# Supplementary material
Source: PubMed Central journal article supplement (PMC4198358)
Supplement: auto-10-1726-s01.pdf [file auto-10-1726-s01.pdf]

## **Supplemental Material to:**

**Cheng-Wu Zeng, Zhen-Hua Chen, Xing-Ju Zhang,  
Bo-Wei Han, Kang-Yu Lin, Xiao-Juan Li, Pan-Pan Wei,  
Hua Zhang, Yangqiu Li, and Yue-Qin Chen**

***MIR125B1* represses the degradation of the PML-RARA  
oncoprotein by an autophagy-lysosomal pathway in acute  
promyelocytic leukemia**

**Autophagy 2014; 10(10)**

**<http://dx.doi.org/10.4161/auto.29592>**

**[www.landesbioscience.com/journals/autophagy/article/29592](http://www.landesbioscience.com/journals/autophagy/article/29592)**

A

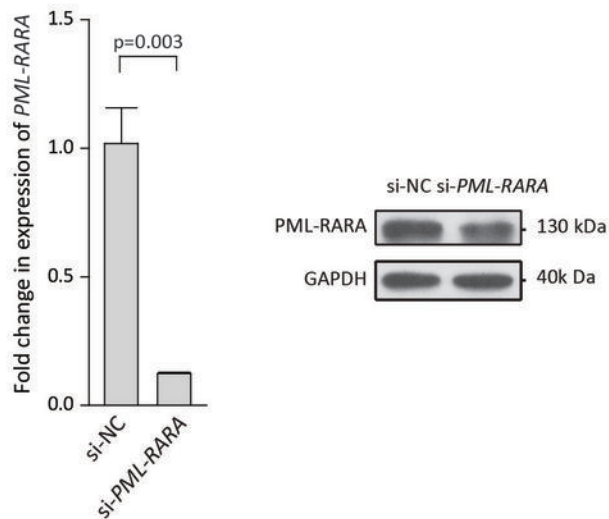

B

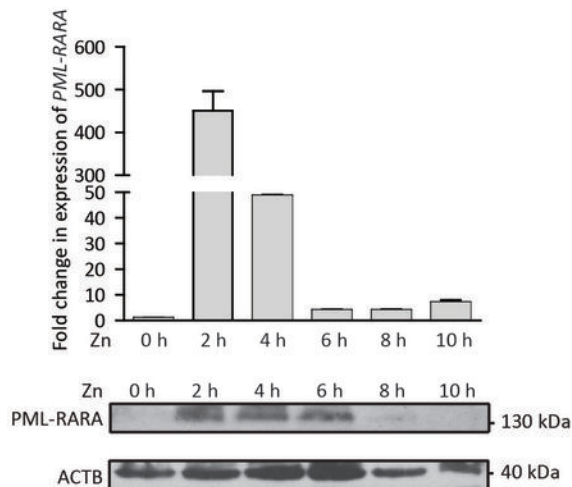

C

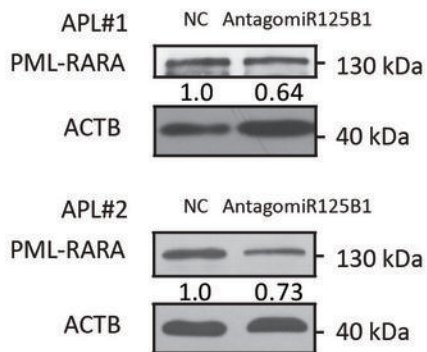

D

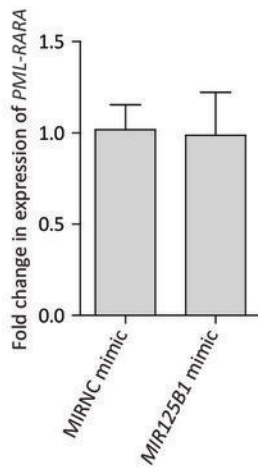

E

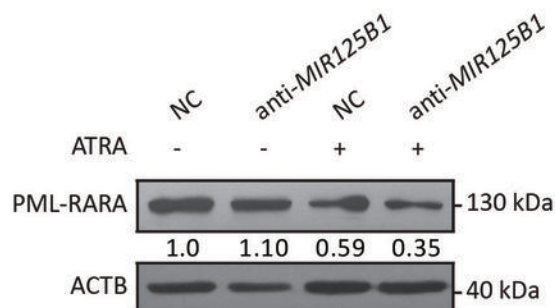



A

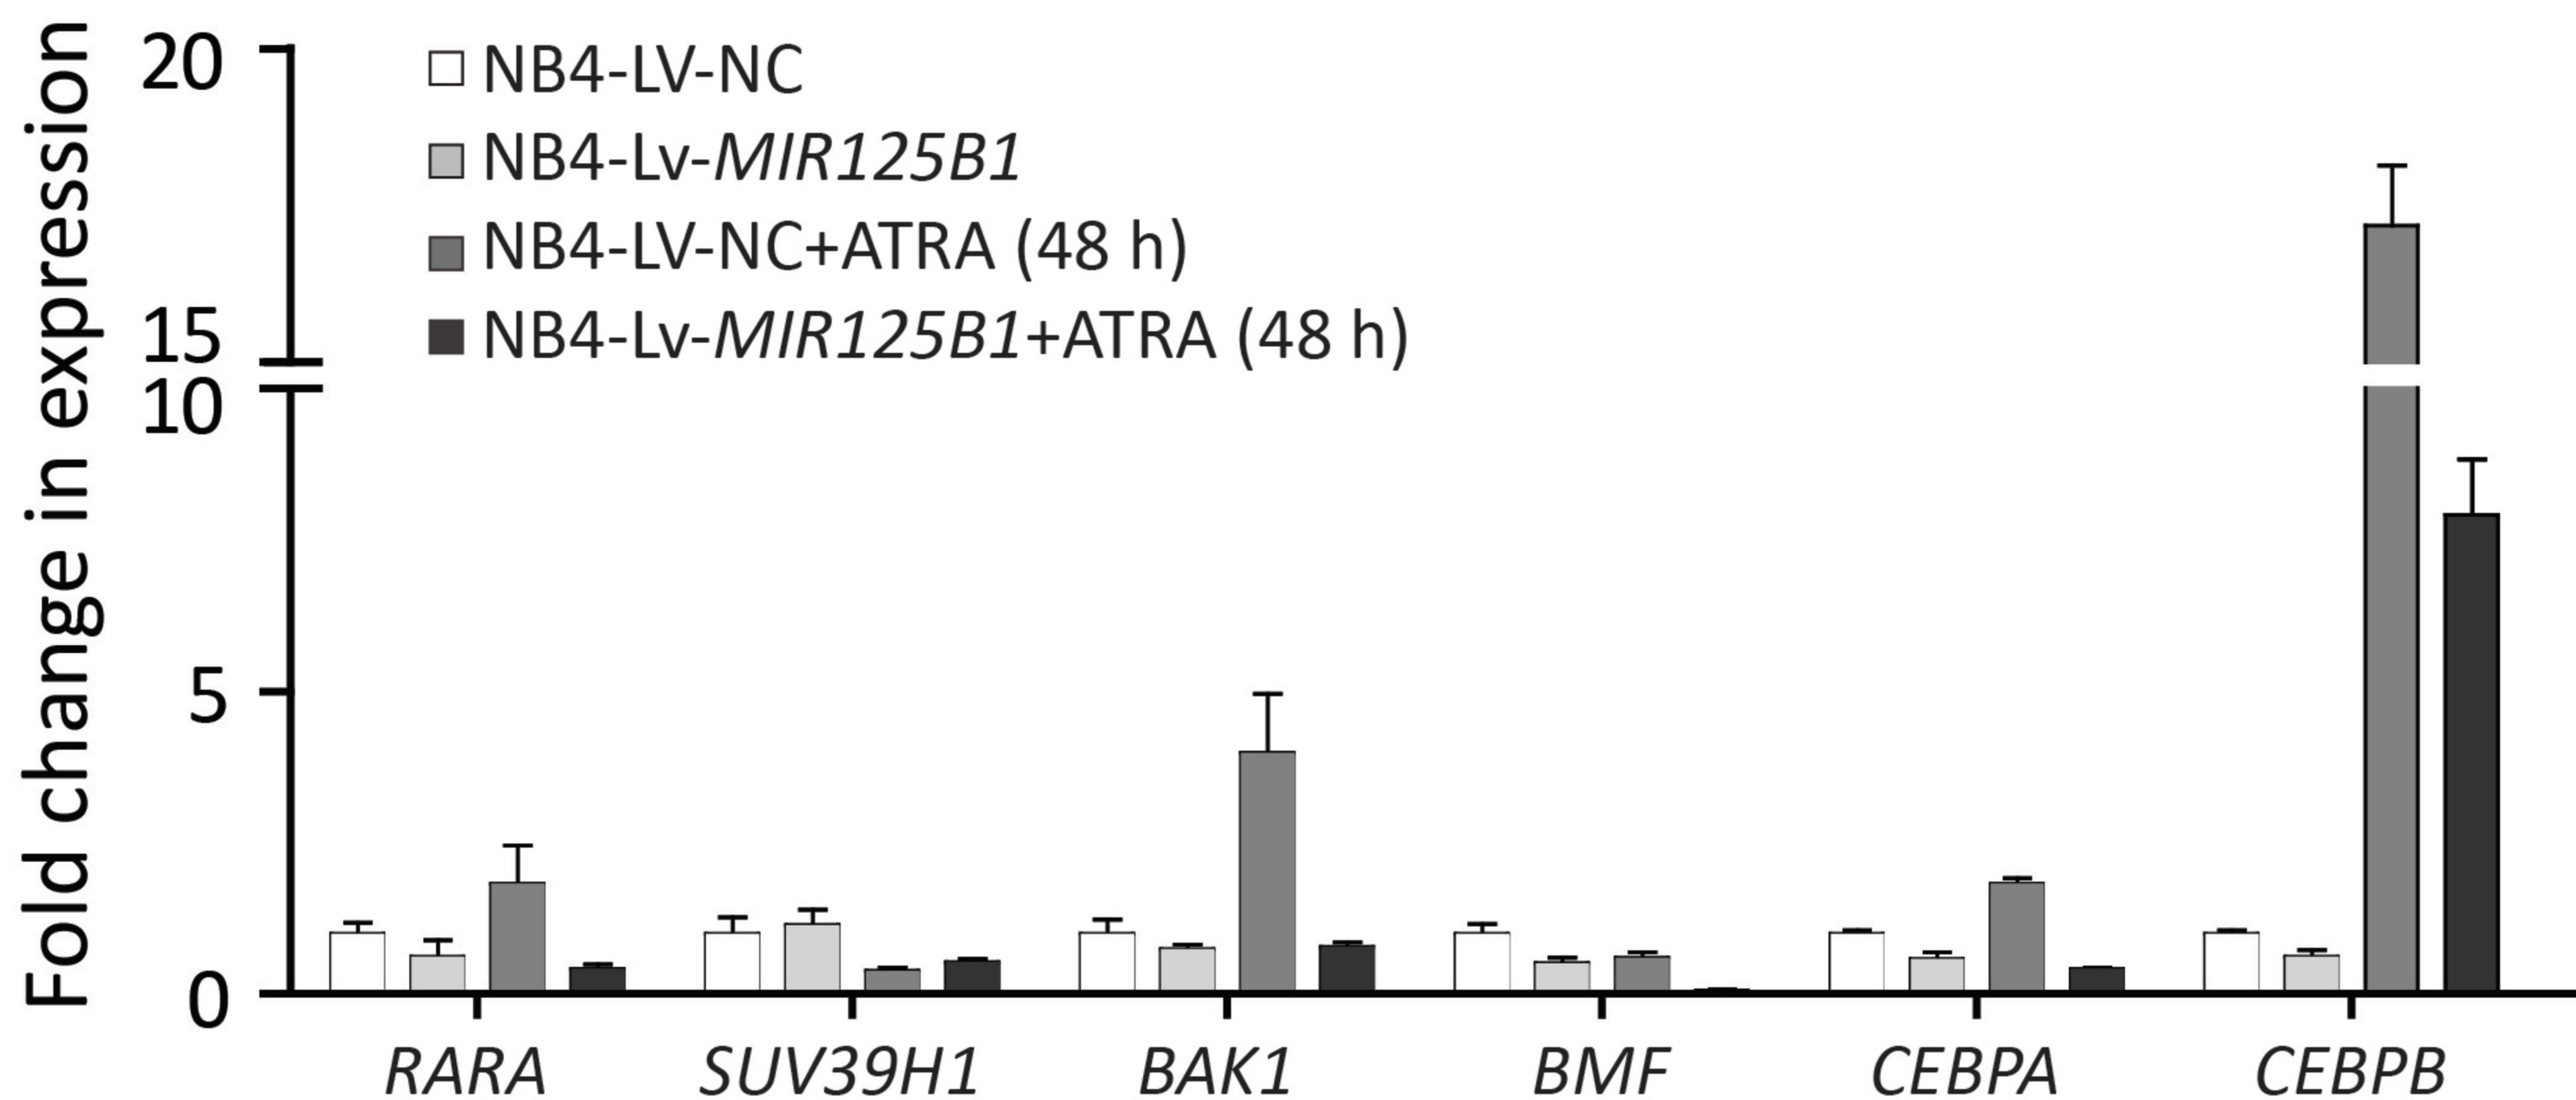

B

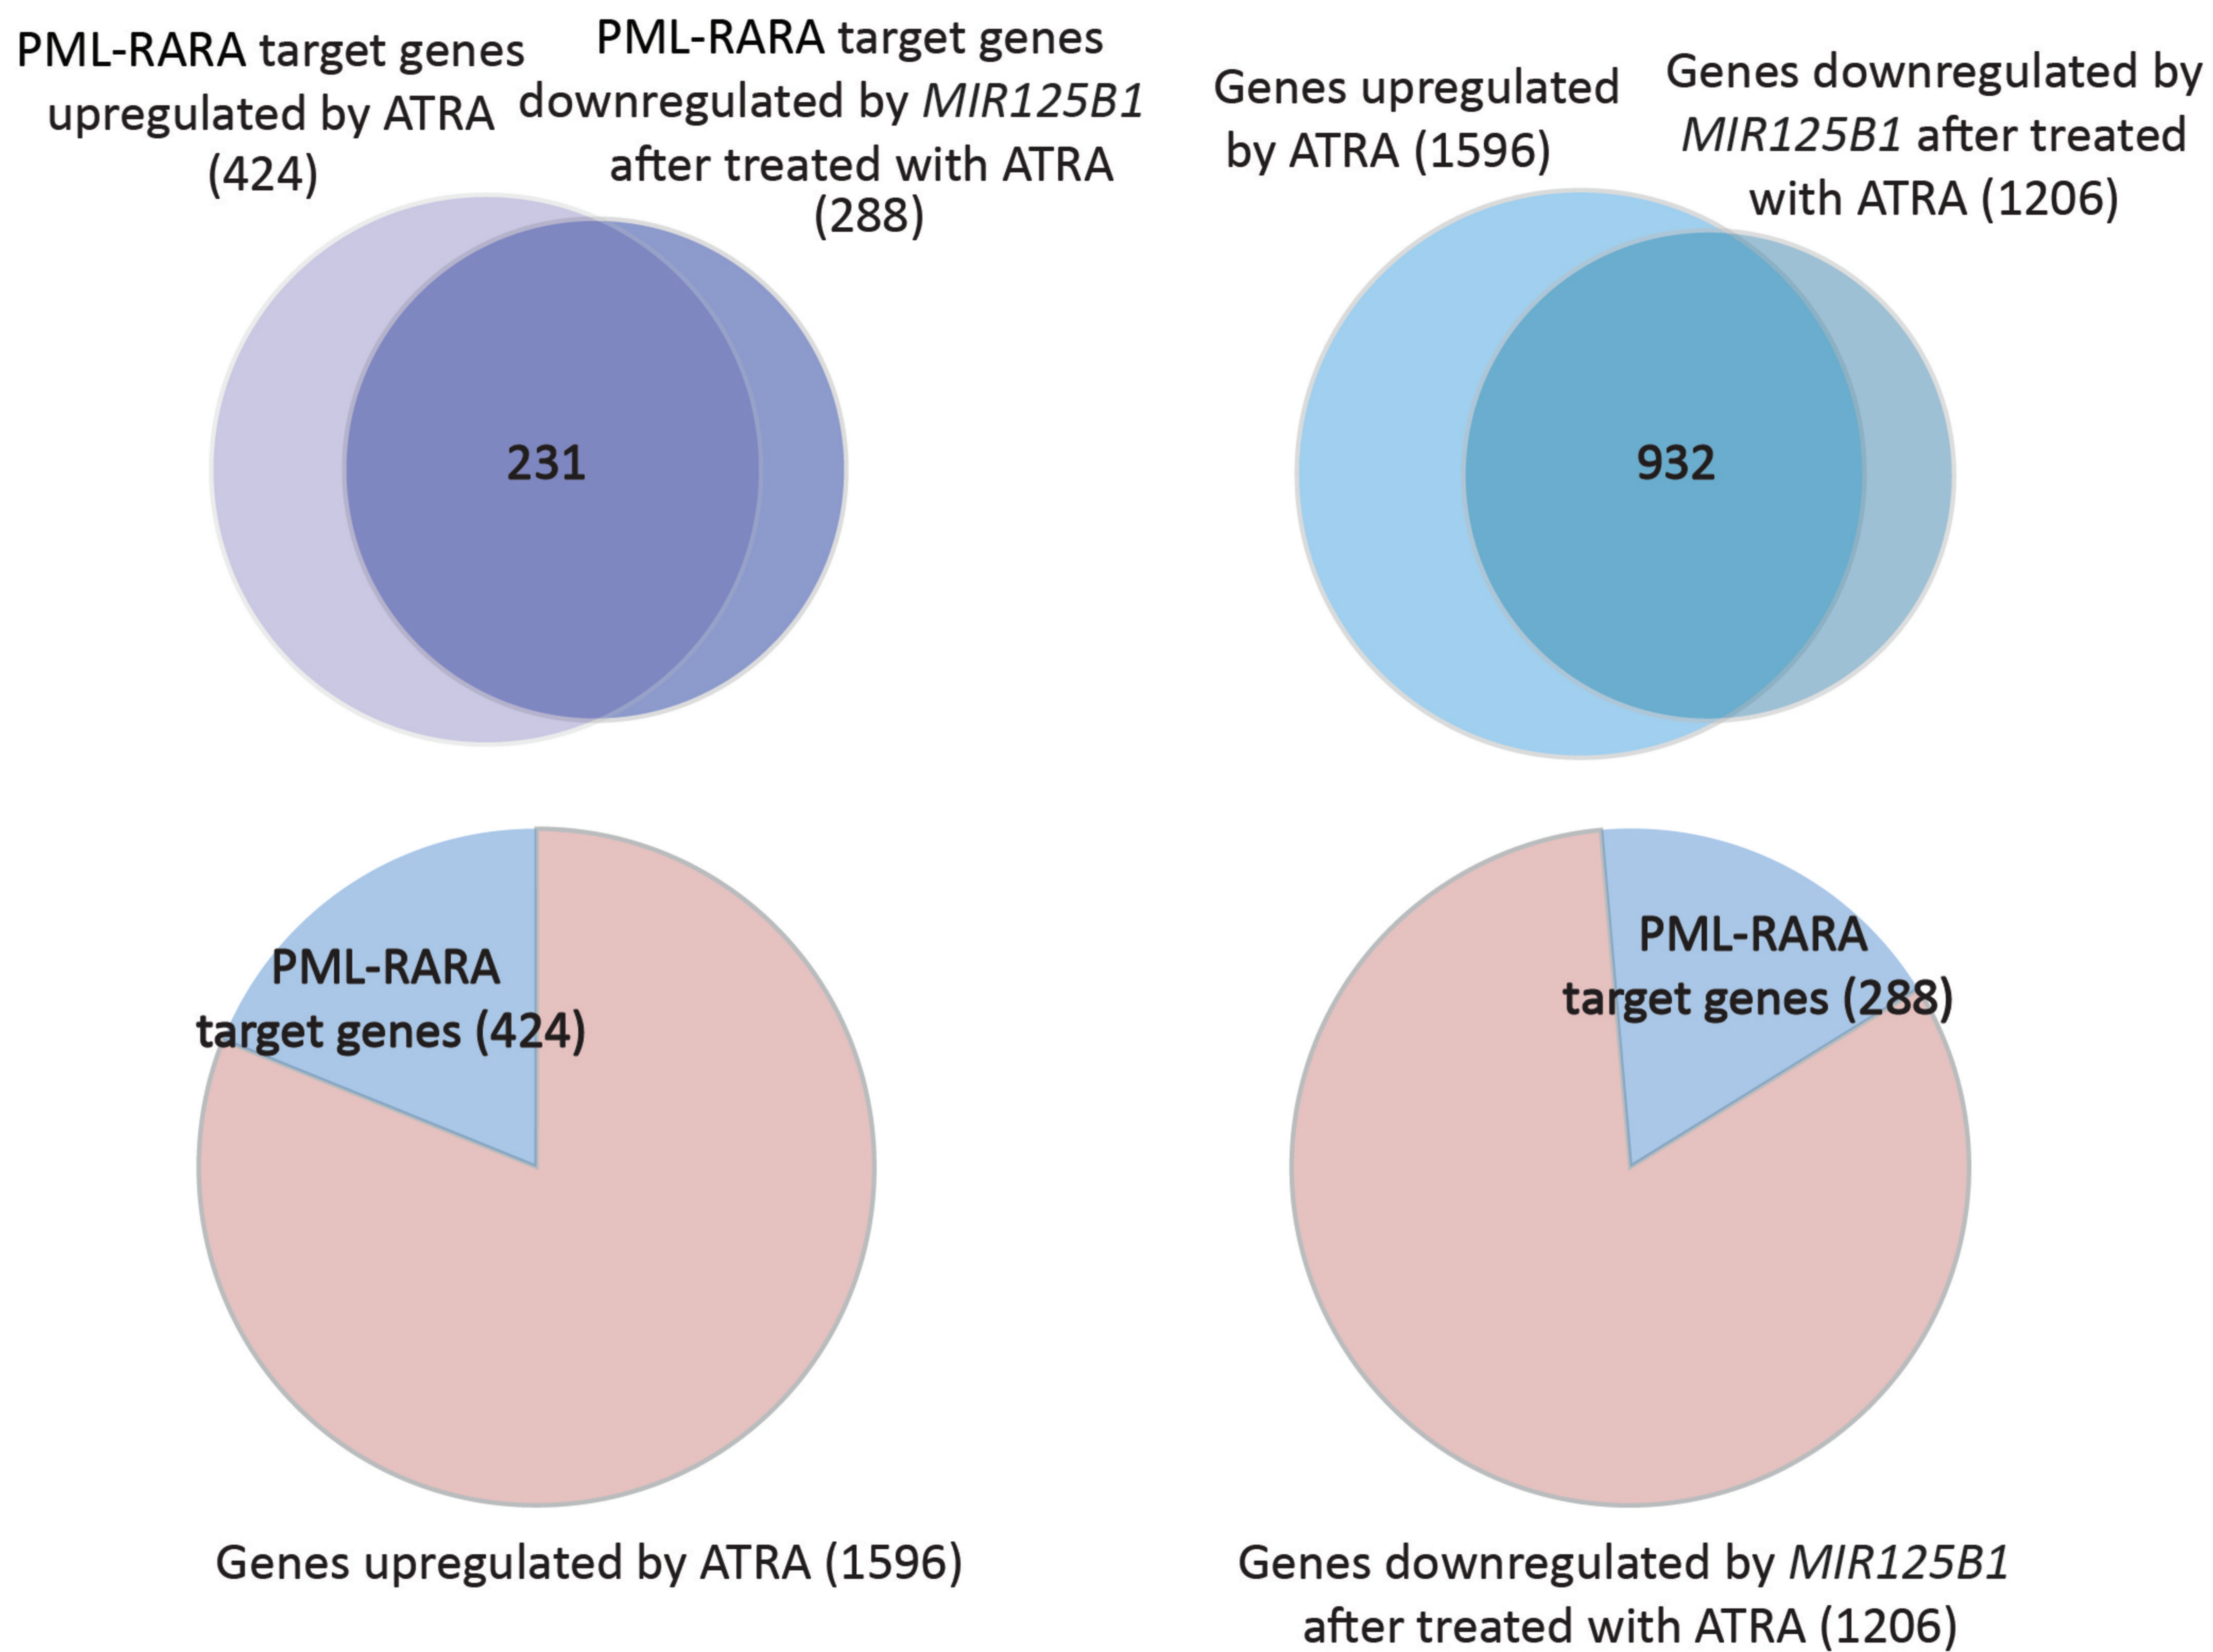



A

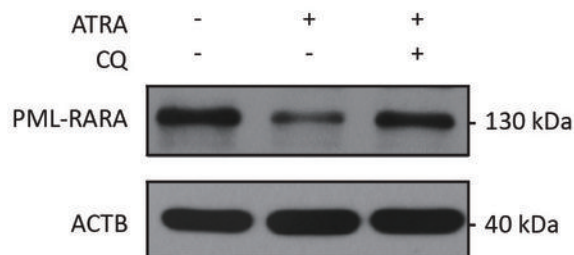

B

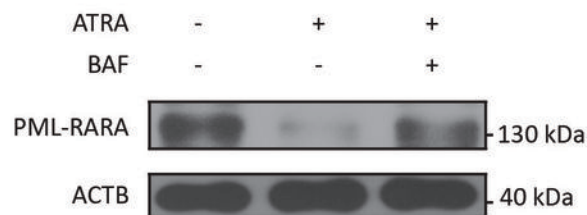

C

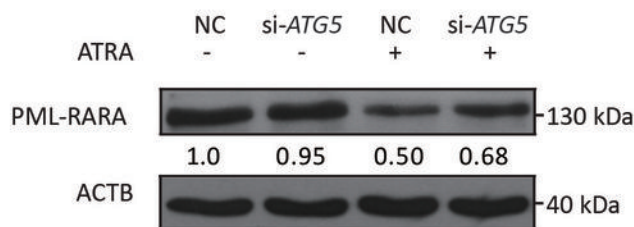

D

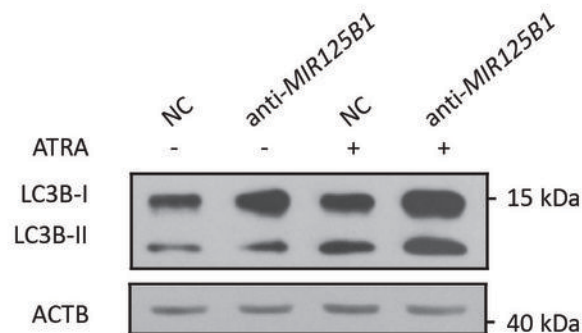

E

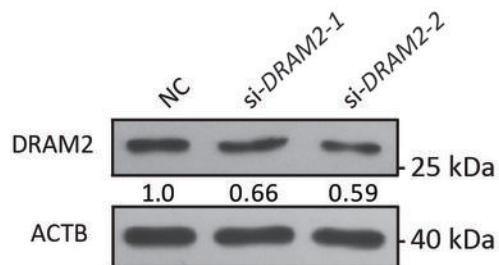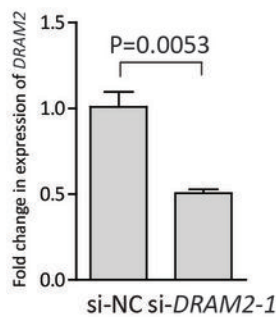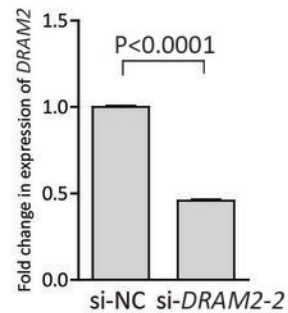



A

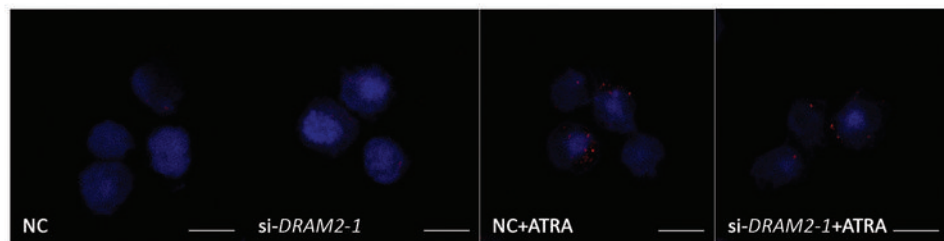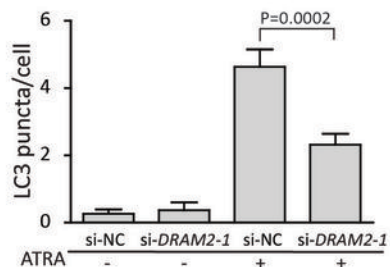

B

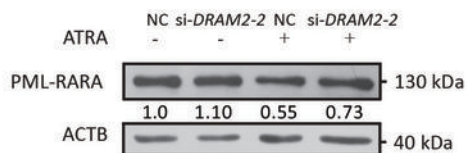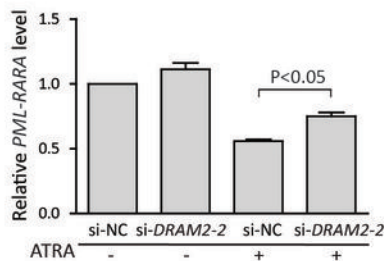

C

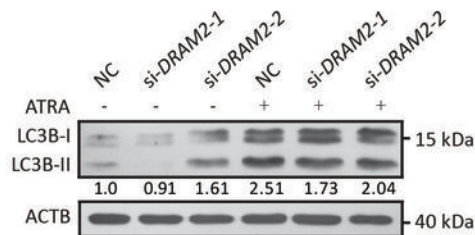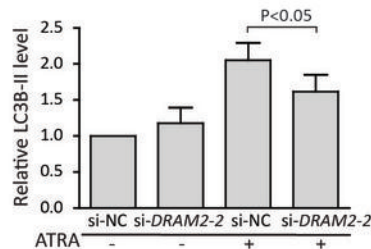

D

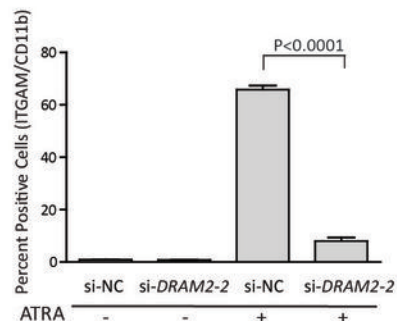



## A

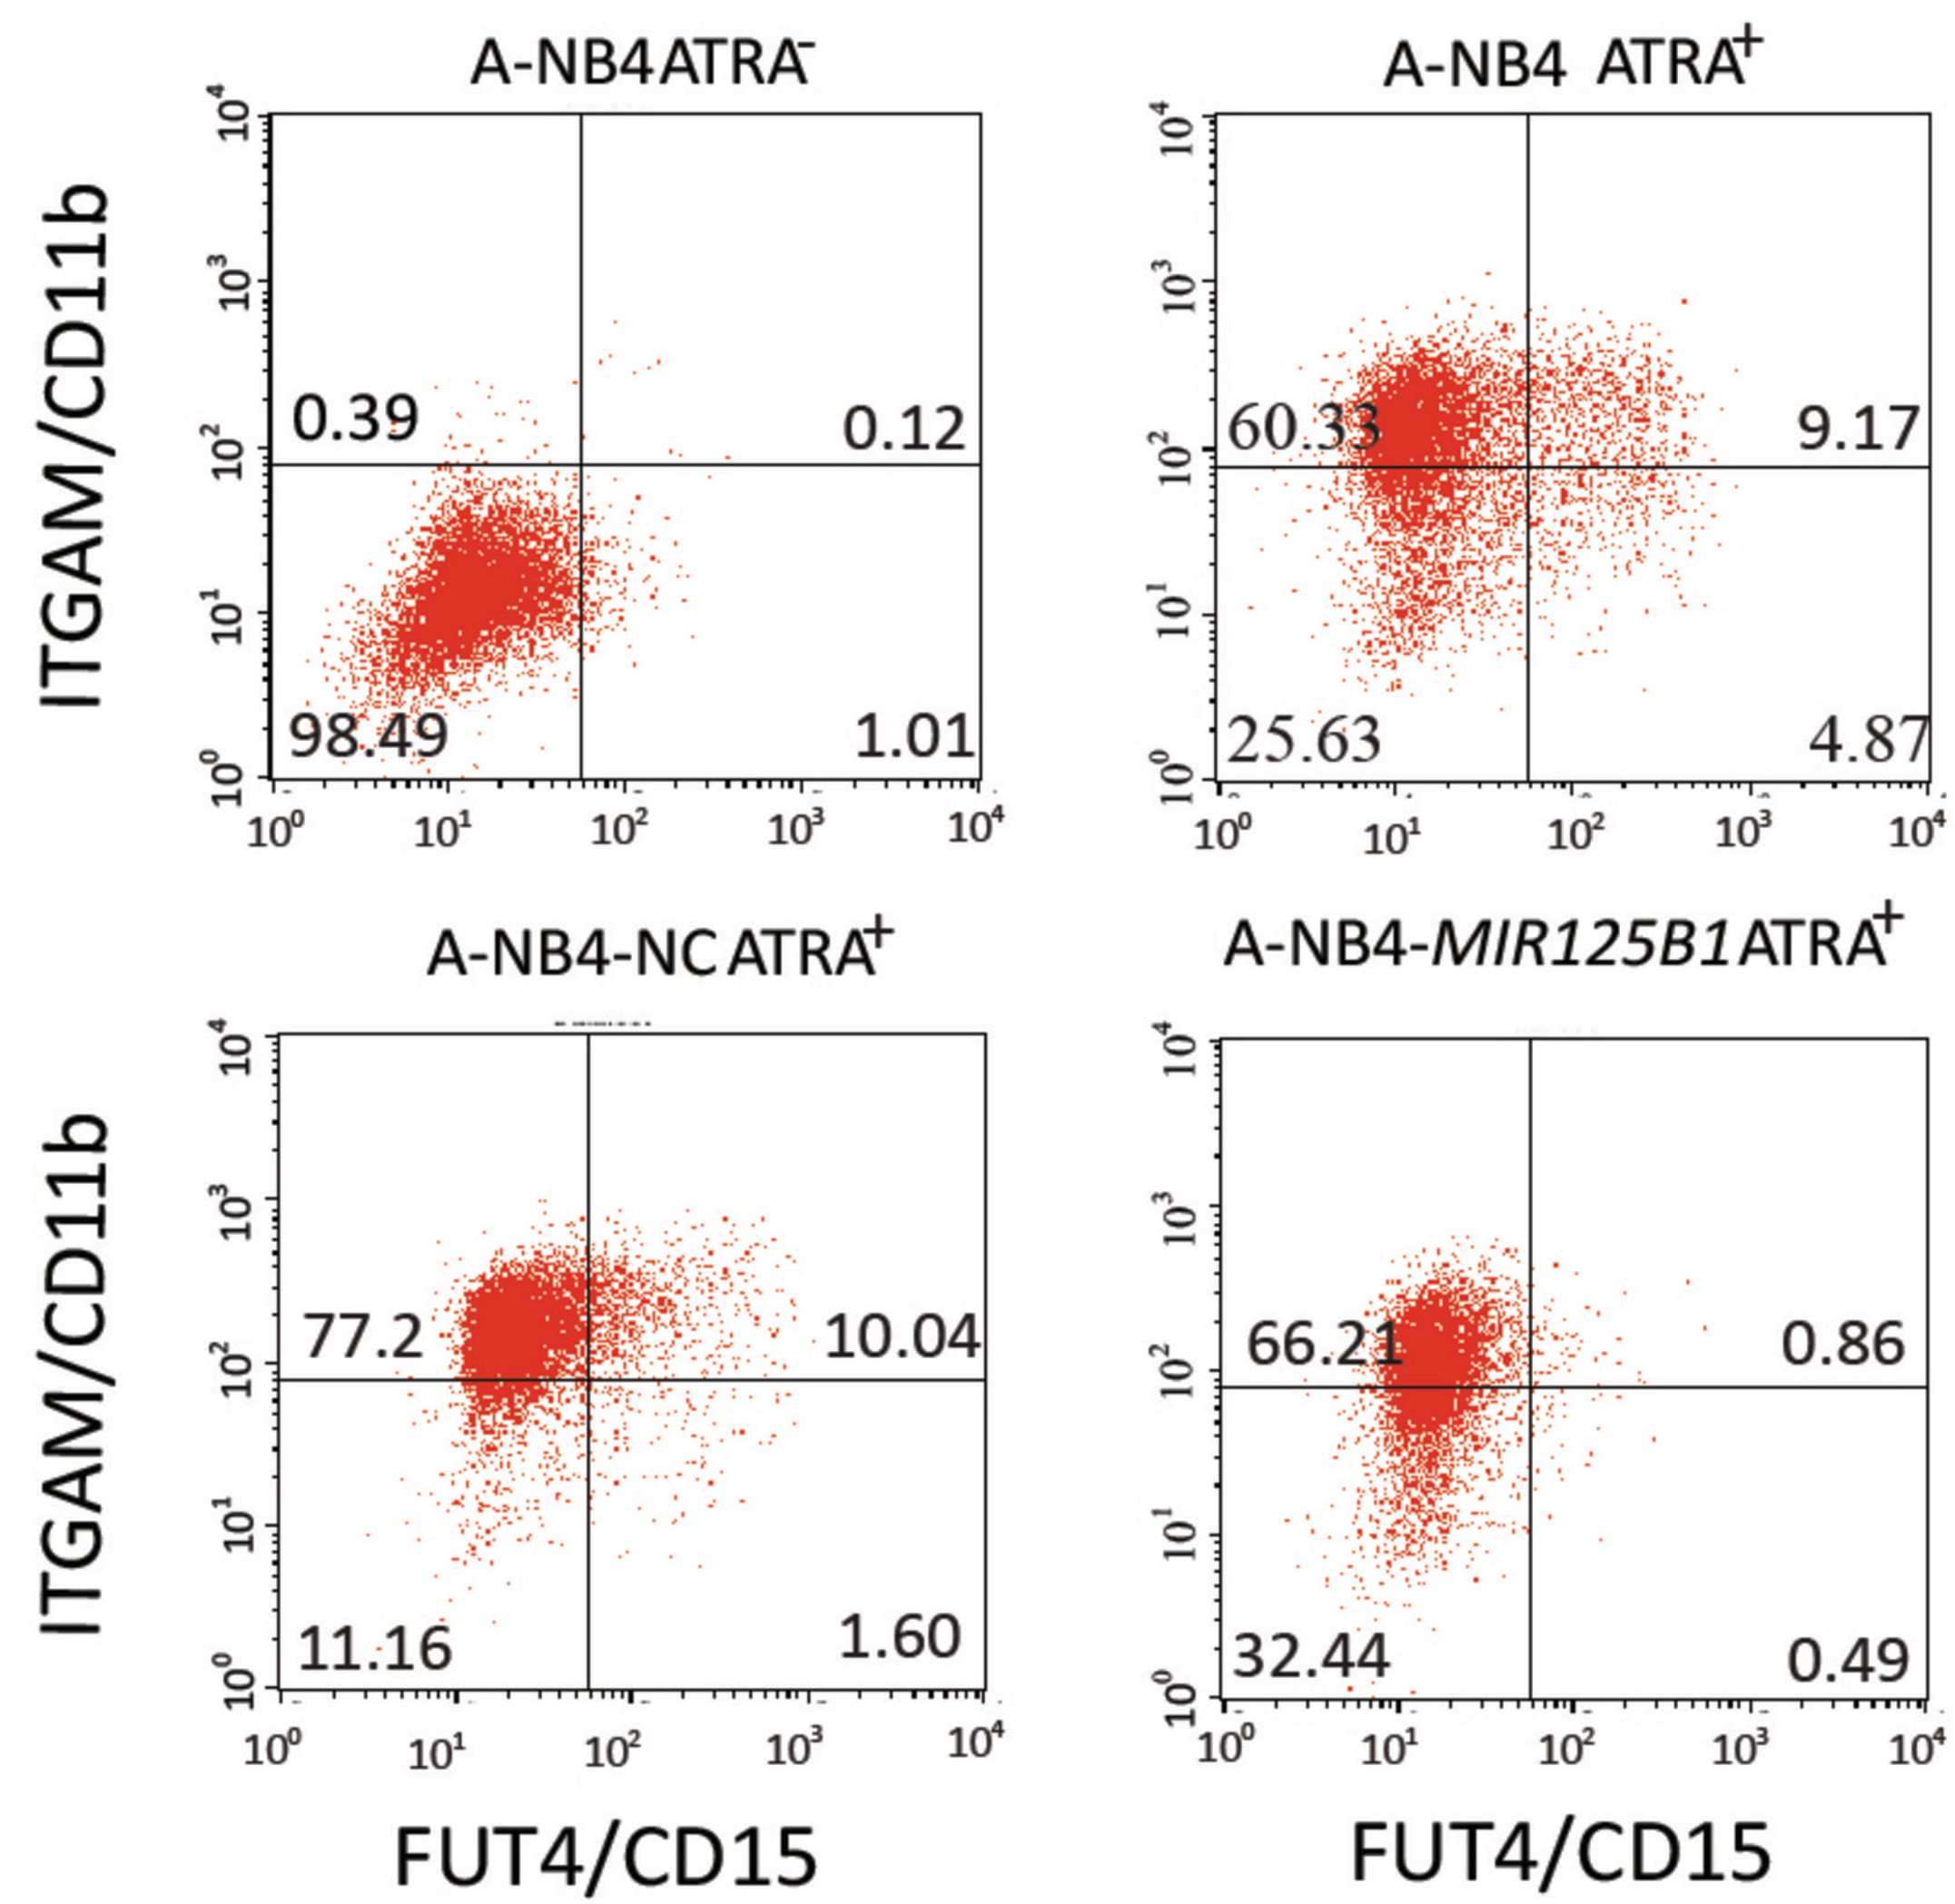

## B

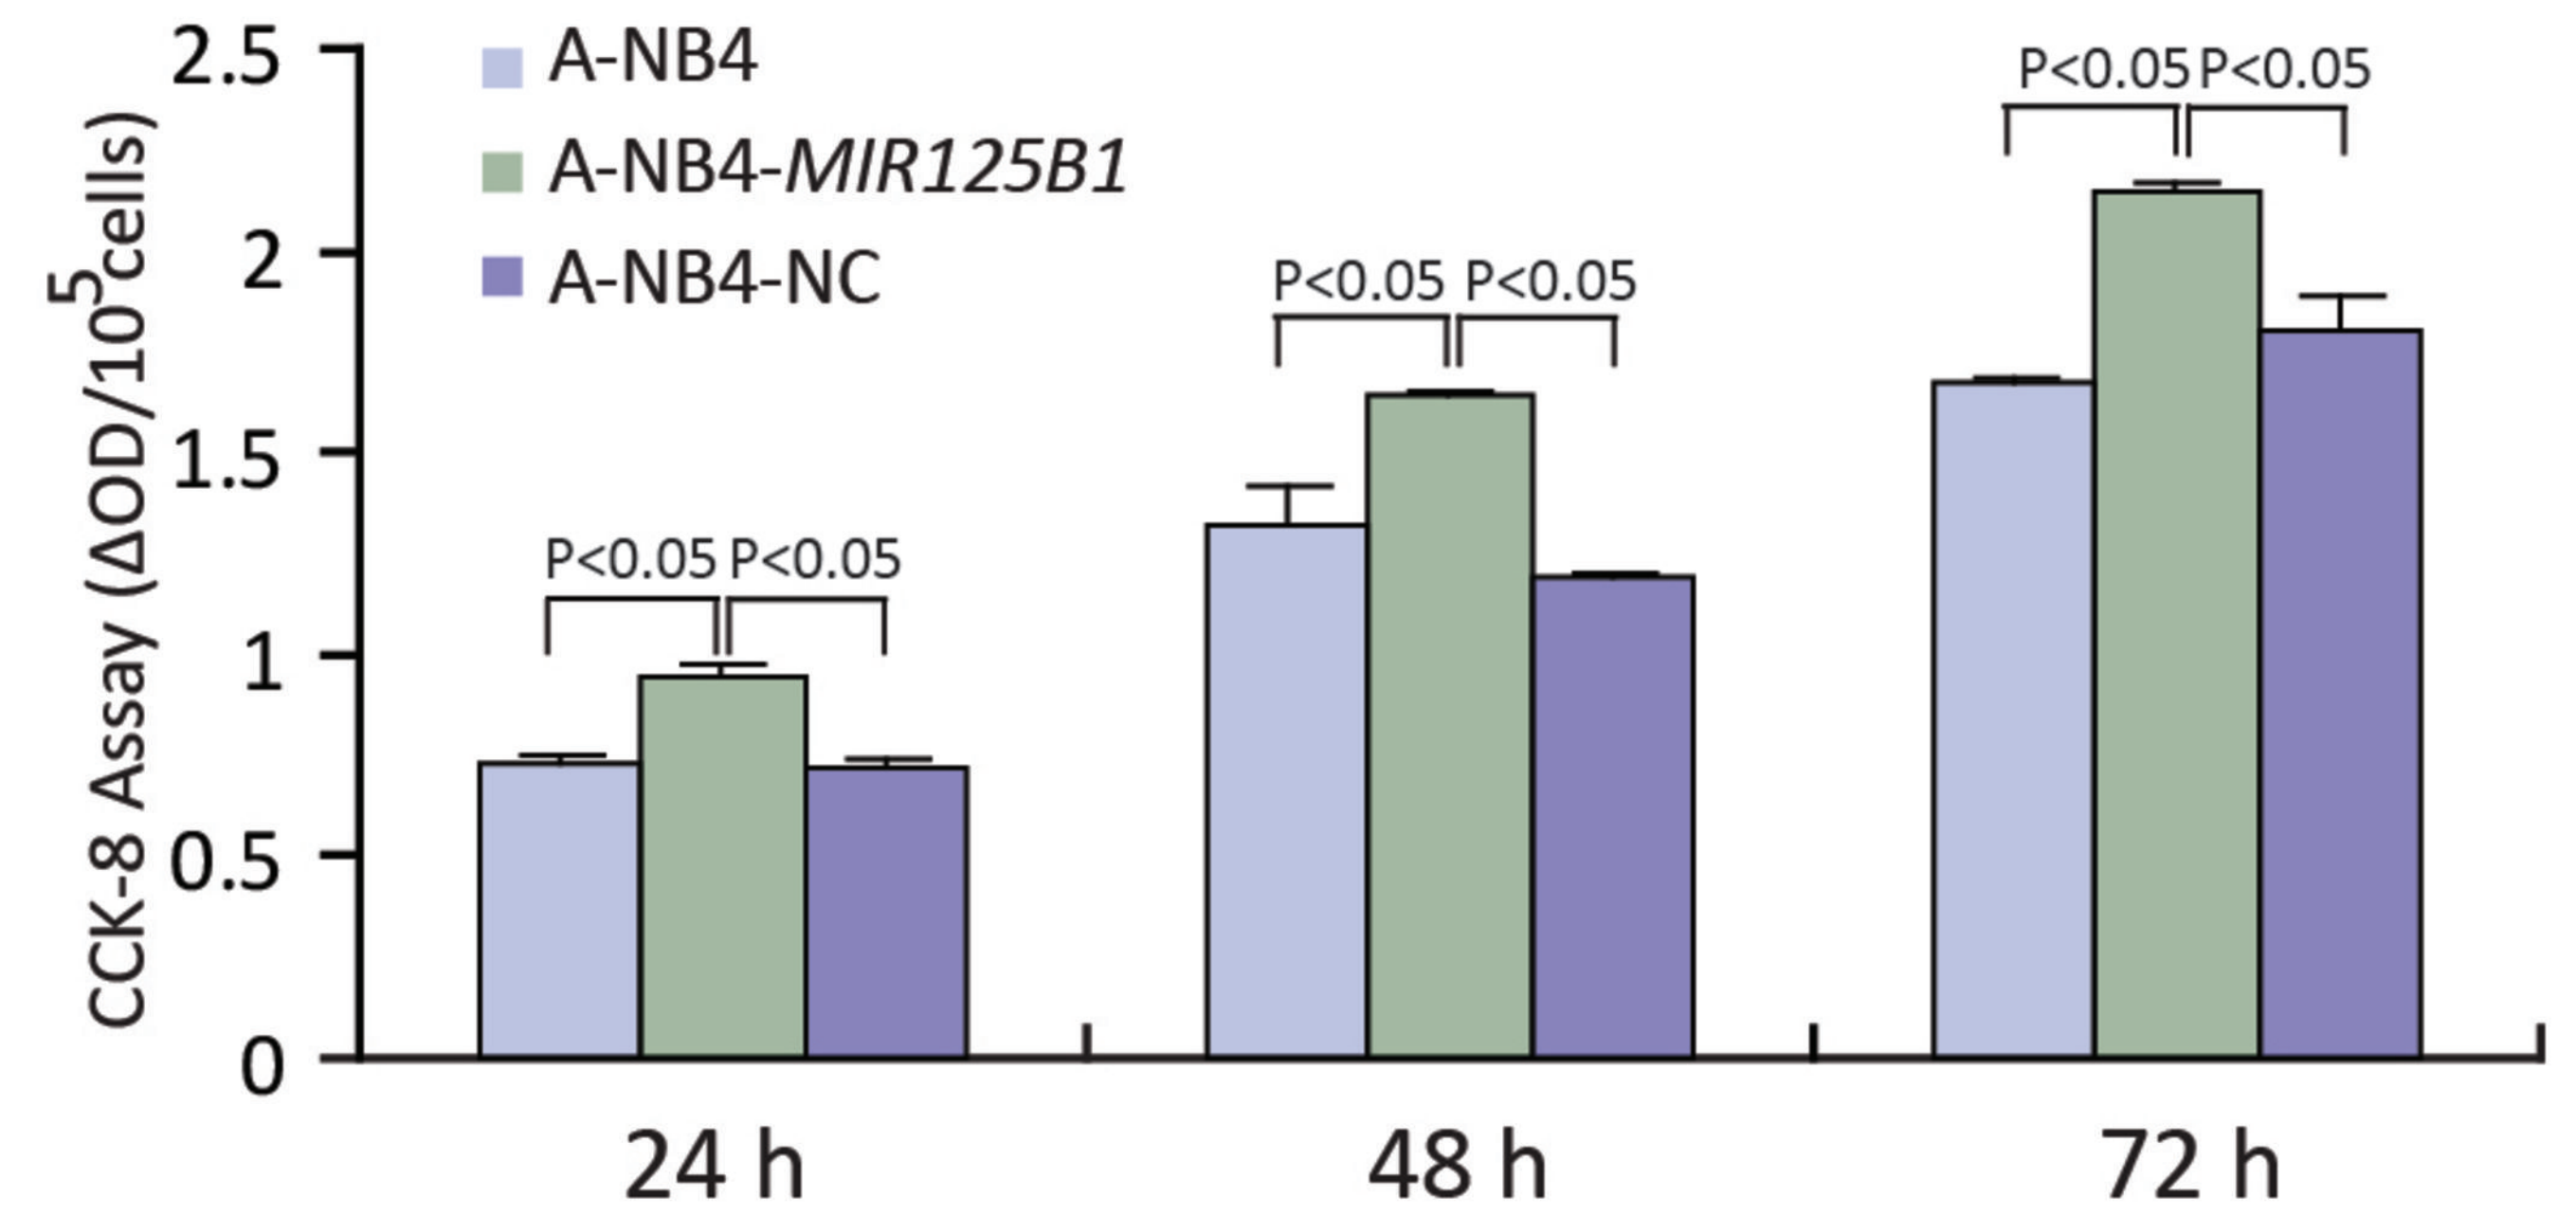

## C

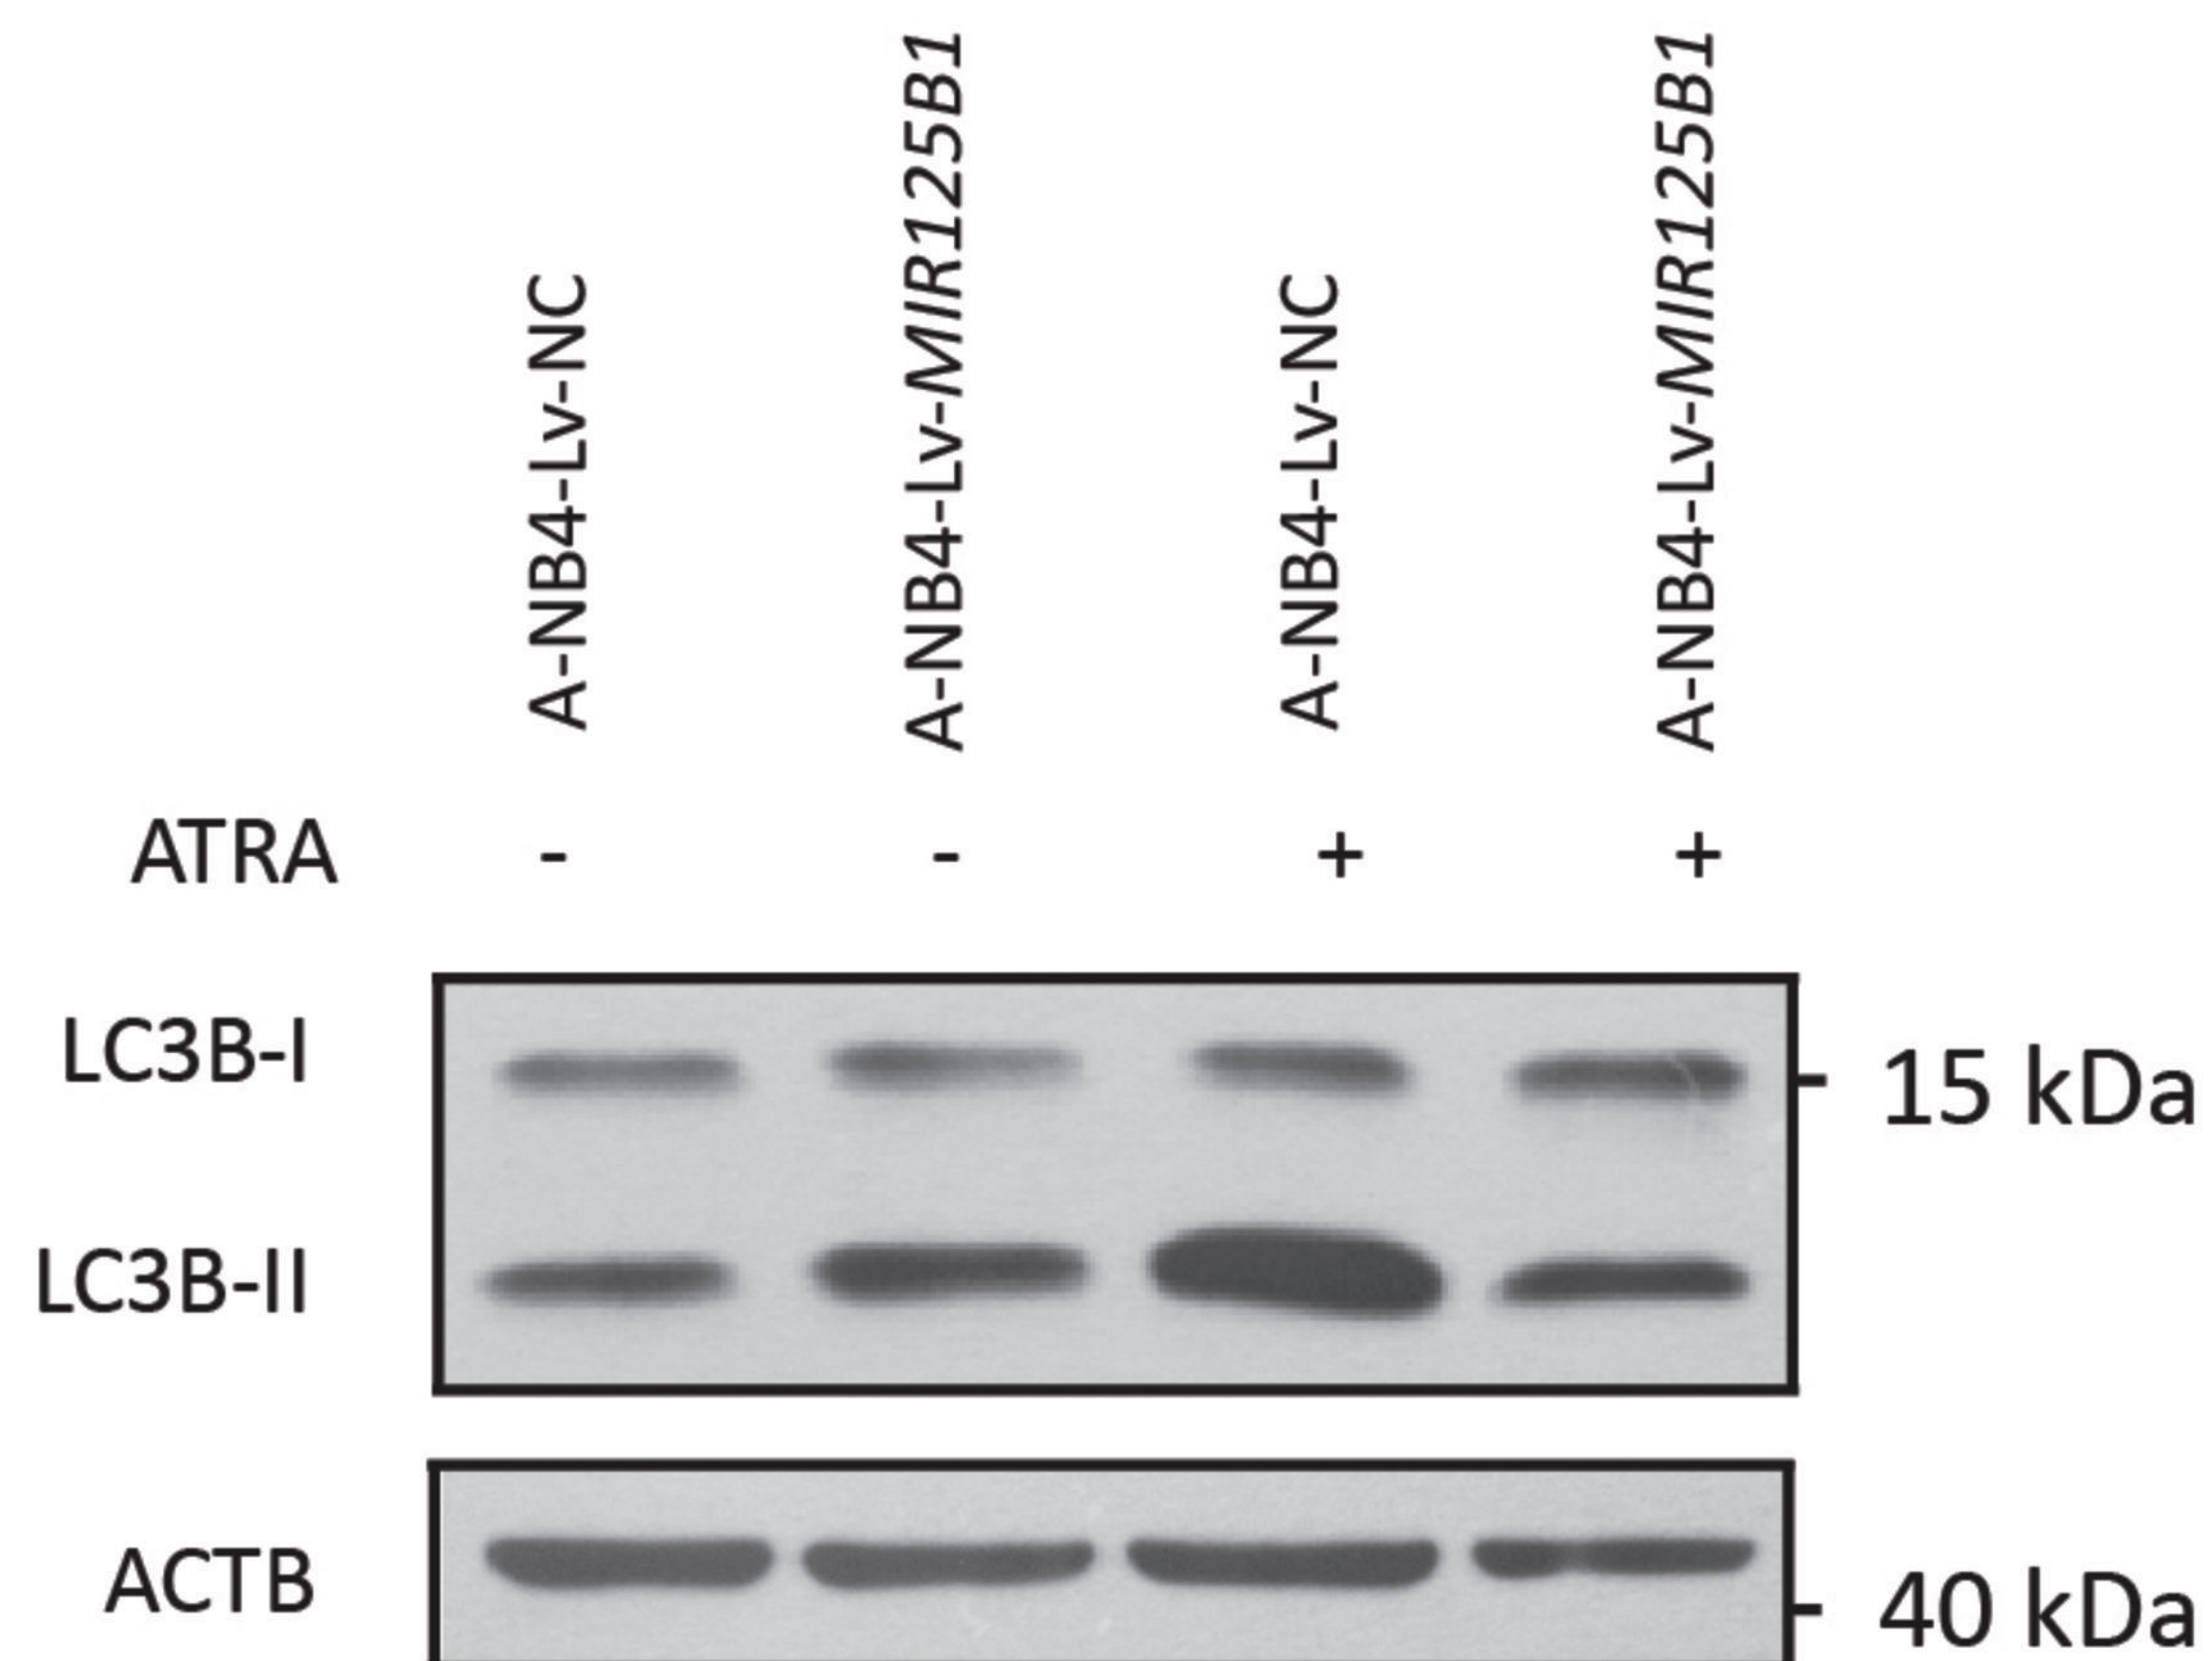

## D

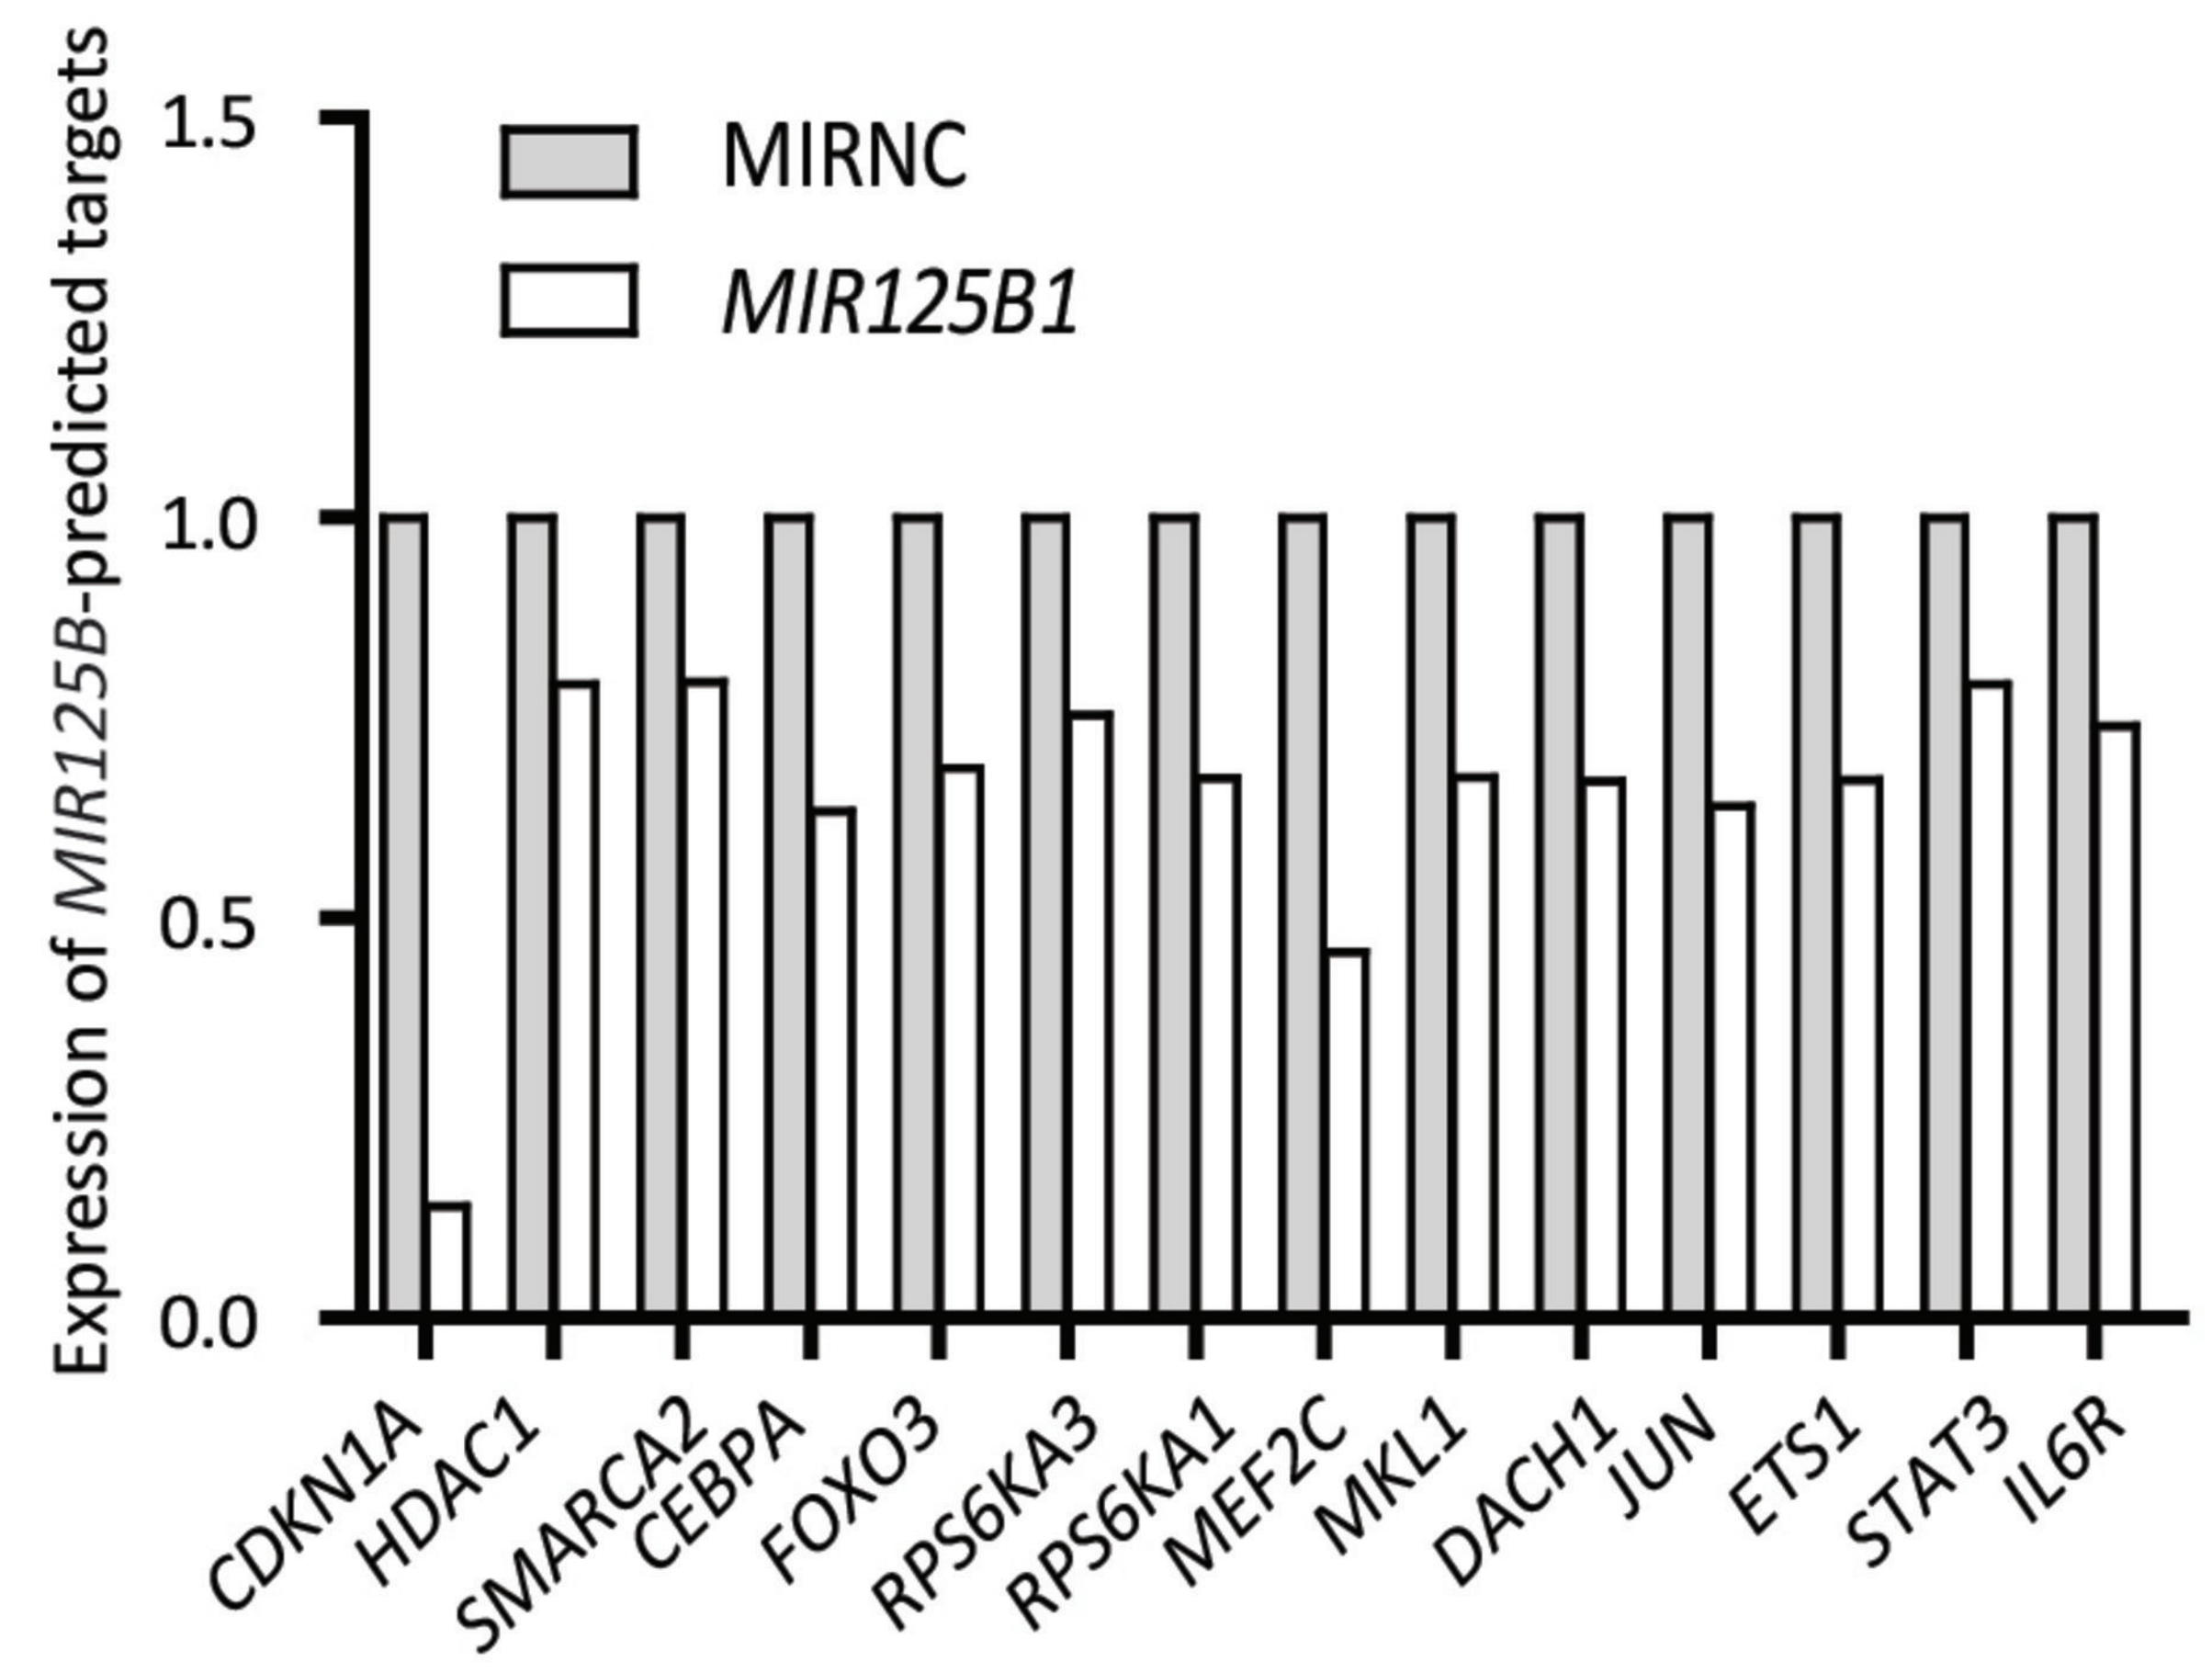



Supplementary Figure 6

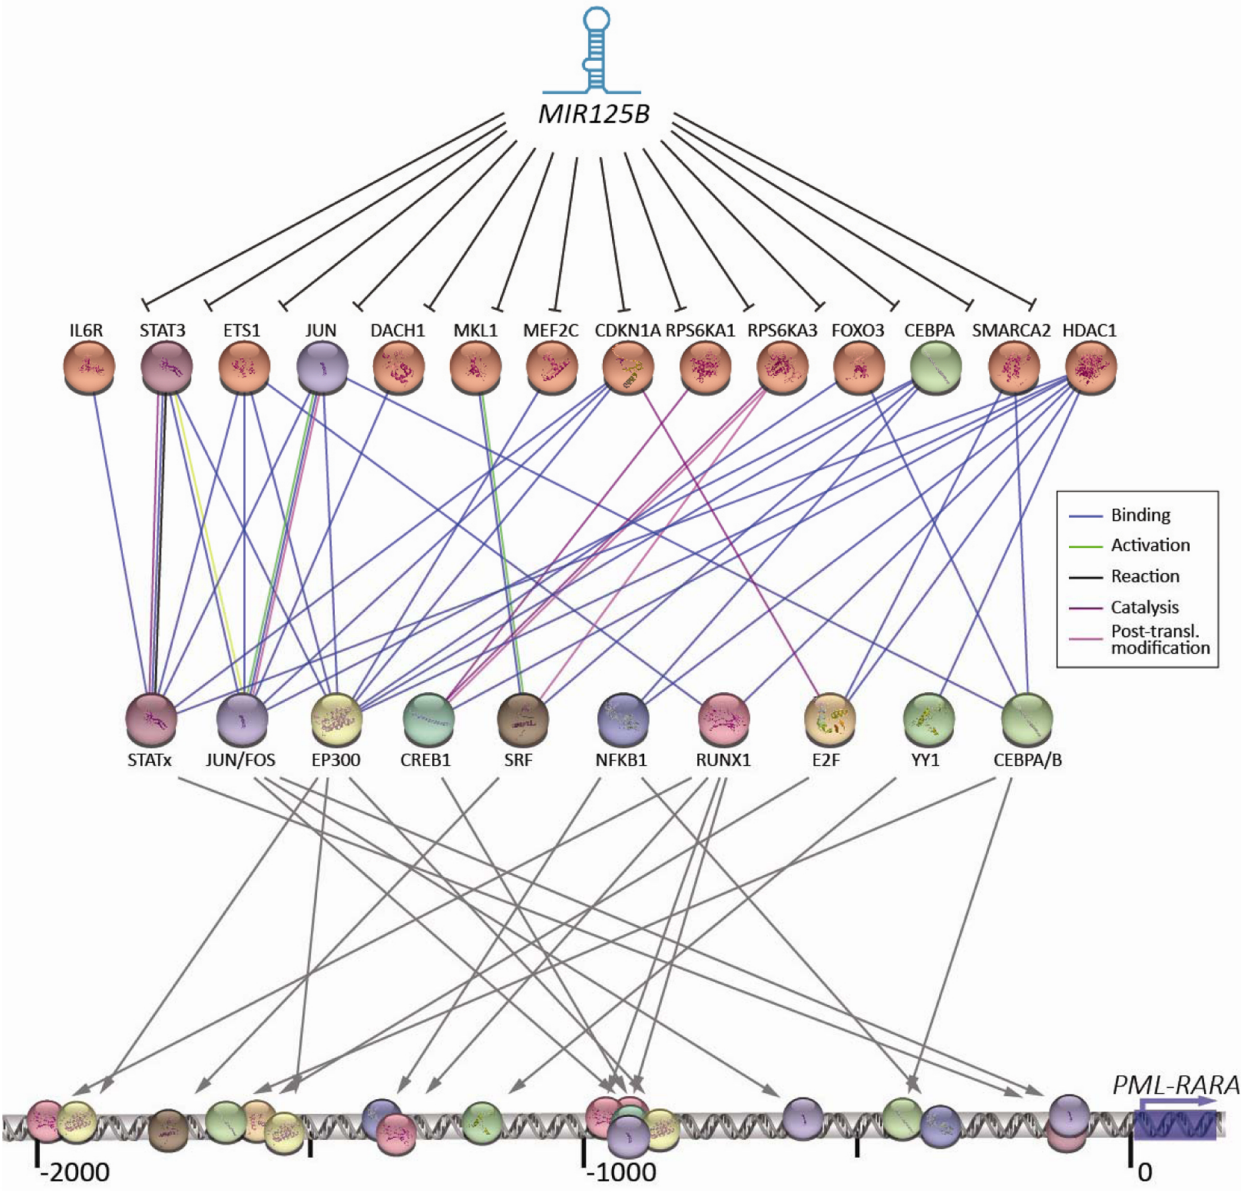

**Figure S1.** Analysis of *PML-RARA* expression associated with *MIR125B1* expression. (A) qRT-PCR analysis and western blot were performed on NB4 cells after knockdown the *PML-RARA*. (B) qRT-PCR and western blot analysis of *PML-RARA* in U937-PR9 cells treated with 100  $\mu$ M  $ZnSO_4$ . (C) *PML-RARA* expression in primary APL patient bone marrow mononuclear cells, which were transfected with antagomirs (chemically engineered oligonucleotide anti-miRNAs) specifically neutralizing *MIR125B1*. *PML-RARA* was assayed by western blot. (D) qRT-PCR analysis of *PML-RARA* mRNA after transient transfection with *MIR125B1* for 12 h. (E) Western blot analyses of *PML-RARA* in NB4 cells transfected with 100 nM *MIR125B1* inhibitor (anti-*MIR125B1*) or control inhibitor (NC) followed by treatment with ATRA (1  $\mu$ M, 36 h). ACTB was used as a loading control. *PML-RARA*/ACTB densitometric ratios were recorded.

**Figure S2.** Validation and analysis of RNA-seq data. (A) qRT-PCR analysis of gene expression to verify the accuracy of RNA-seq. The criteria for selecting the genes used to confirm the RNA sequencing data were mainly based on the differentially expressed levels (great or minor) after ATRA treatment and some of them could be induced or inhibited by ATRA. (B) A significant overlap in the expression of potential *PML-RARA* targets genes altered in the presence of *MIR125B1* after ATRA treatment. The numbers indicate how many genes belong to each DEG subset.

**Figure S3.** Autophagy regulates ATRA-induced degradation of *PML-RARA*. (A) NB4 cells were treated with ATRA (1  $\mu$ M, 48 h) with or without chloroquine (40  $\mu$ M), and *PML-RARA* was assayed by western blot using RARA antibody. (B) NB4 cells were treated with ATRA (1  $\mu$ M, 24 h) with or without bafilomycin A<sub>1</sub> (25 nM). ACTB expression served as loading controls. (C) Western blot analyses of *PML-RARA* in ATG5-knockdown NB4 cells, followed by treatment with ATRA (1  $\mu$ M, 48 h). ACTB was used as a loading control. *PML-RARA*/ACTB densitometric ratios were recorded. (D) Western blot analyses of LC3 in NB4 cells transfected with 100 nM miRNA inhibitor-NC or miRNA inhibitor, followed by treatment with ATRA (1  $\mu$ M, 24 h). ACTB was used as a loading control. (E) Western blot and qRT-PCR analysis of DRAM2 after transient transfection with the indicated siRNA for 48 h. ACTB was used as a loading control.



**Figure S4.** DRAM2 involved in ATRA-induced autophagy and degradation of PML-RARA. **(A)** Confocal microscopy after staining with an antibody directed against LC3. NB4 transduced with lentiviral vectors expressing shRNAs targeting *DRAM2* and scrambled controls, and also treated with or without ATRA (1  $\mu$ M, 24 h). A representative image of 3 independent experiments is shown. Scale bar, 10  $\mu$ m. **(B)** Western blot analyses of PML-RARA in NB4 cells transfected with si-*DRAM2-2* and scrambled controls (si-NC), followed by treatment with ATRA. Quantification of data from 3 independent experiments (bottom panel). **(C)** NB4 cells were transfected with the indicated siRNA for 24 h, and then treated with ATRA (1  $\mu$ M) for 24 h. The level of LC3-I/II protein expression was assayed by western blot. LC3-II/ACTB densitometric ratios were marked. Quantification of data from 3 independent experiments (bottom panel). **(D)** Knockdown of DRAM2 inhibits ATRA-induced differentiation. Results from NB4 cells transfected with si-*DRAM2-2* and scrambled controls (si-NC). The expression of ITGAM/CD11b was determined by FACS analysis.

**Figure S5.** Effects of *MIR125B1* overexpression. **(A)** Flow cytometry to determine the percentage of CD11b- and FUT4/CD15-positive cells. **(B)** CCK-8 assay (O.D at 450 nm) to measure the proliferation of ascitic cells at the indicated times after treatment with ATRA (1  $\mu$ M). **(C)** Western blot analyses of LC3 in A-NB4-Lv-NC and A-NB4-Lv-*MIR125B1* cells treated with ATRA. A-NB4: ascitic cells developed from the injection of NB4 cells; A-NB4-NC: ascitic cells developed from the injection of NB4-lv-NC cells; A-NB4-*MIR125B1*: ascitic cells developed from the injection of NB4-lv-*MIR125B1* cells. **(D)** Expression analysis of several transcription factors in NB4 cells stably overexpressing *MIR125B1* and controls.

**Figure S6.** Bioinformatic analysis of the regulation of *PML-RARA* by *MIR125B1*. TFSEARCH software package (<http://mbs.cbrc.jp/research/db/TFSEARCH.html>) was used to scan the *PML-RARA* promoter.

**Table S1.** Gene expression level in NB4-Lv-MIR125B and NB4-Lv-NC cells with or without ATRA treatment

| Symbol    | GeneID | Length | NB4-LV-miR-125b_RPKM | NB4-LV-miR-125b+ATRA_RPKM | NB4-LV-NC_RPKM | NB4-LV-NC+ATRA_RPKM |
|-----------|--------|--------|----------------------|---------------------------|----------------|---------------------|
| EEF1A1    | 1915   | 3528   | 2099.013504          | 2361.723285               | 2095.420214    | 779.3052201         |
| ACTB      | 60     | 1852   | 3575.875063          | 4335.852391               | 4370.126387    | 4462.507121         |
| MPO       | 4353   | 3215   | 1717.479538          | 1554.422588               | 1577.768134    | 155.6467027         |
| HSP90AA1  | 3320   | 3887   | 1387.533368          | 707.4808753               | 1453.989216    | 407.8261965         |
| GAPDH     | 2597   | 1310   | 4059.327725          | 3918.623327               | 3713.934504    | 2561.265957         |
| RN28S1    | 1E+08  | 5070   | 1037.693166          | 1053.598643               | 1322.175863    | 978.8852925         |
| CALR      | 811    | 1929   | 2502.008798          | 1149.511688               | 2796.319314    | 827.974976          |
| MALAT1    | 378938 | 8708   | 526.996168           | 582.1337558               | 631.4764813    | 1333.826745         |
| SRGN      | 5552   | 1270   | 3388.465172          | 4969.870705               | 3045.994249    | 3147.689123         |
| HSPA8     | 3312   | 2276   | 1846.300358          | 980.5225561               | 1957.540318    | 527.5957887         |
| PTMA      | 5757   | 1223   | 3105.399652          | 2519.849575               | 3281.04676     | 1082.986141         |
| PABPC1    | 26986  | 2869   | 1097.658444          | 1169.929847               | 1043.977963    | 440.4185997         |
| EEF1G     | 1937   | 1552   | 1887.148059          | 1946.340125               | 1793.470004    | 603.8953837         |
| RPL4      | 6124   | 1458   | 1994.937968          | 2125.163567               | 1943.1532      | 720.3024287         |
| RPS6      | 6194   | 829    | 3421.311042          | 3802.939474               | 3156.782936    | 1249.979915         |
| RPLP0     | 6175   | 1289   | 2172.772429          | 2604.324589               | 2046.626478    | 741.7156864         |
| LDHA      | 3939   | 2323   | 1189.979734          | 779.5786607               | 1347.656612    | 620.3577595         |
| HSP90B1   | 7184   | 2780   | 951.4249643          | 624.8132293               | 882.6078898    | 494.3487592         |
| RPS2      | 6187   | 962    | 2558.013995          | 2632.066317               | 2271.860261    | 922.7136841         |
| TPT1      | 7178   | 829    | 2931.671802          | 3049.232781               | 2970.73001     | 2074.102246         |
| ENO1      | 2023   | 2567   | 935.1443489          | 973.3630284               | 906.705466     | 522.6717973         |
| LCP1      | 3936   | 3808   | 618.847825           | 723.3284706               | 614.9340888    | 840.4944202         |
| MKI67     | 4288   | 12507  | 185.1355959          | 139.9318706               | 146.4819834    | 57.86225194         |
| EEF2      | 1938   | 3163   | 718.8086416          | 832.1529156               | 676.7391455    | 253.1160775         |
| YBX1      | 4904   | 1561   | 1407.266197          | 1069.197187               | 1268.791386    | 479.8121672         |
| P4HB      | 5034   | 2596   | 829.9842001          | 815.7083987               | 736.4852872    | 366.259002          |
| TUBB      | 203068 | 2510   | 832.4461338          | 881.831497                | 782.2586802    | 325.2572129         |
| MSN       | 4478   | 3981   | 522.1319591          | 346.4233825               | 599.3035733    | 379.8401422         |
| NCL       | 4691   | 2732   | 710.9376848          | 553.9822821               | 713.2794122    | 272.4490956         |
| ALDOA     | 226    | 2353   | 825.0147999          | 844.3587833               | 865.0732643    | 1068.494041         |
| HSP90AB1  | 3326   | 2567   | 747.5581347          | 521.1003531               | 762.3371483    | 223.4839882         |
| RPS24     | 6229   | 2820   | 678.8229964          | 679.8767445               | 684.8773062    | 358.4139407         |
| MTRNR2L2  | 1E+08  | 1036   | 1791.732797          | 2339.74319                | 1728.211455    | 1665.348648         |
| HNRNPA2B1 | 3181   | 3702   | 494.8994085          | 412.4391021               | 508.4075241    | 276.9589927         |
| HMGB1     | 3146   | 3428   | 528.1367201          | 449.8256063               | 469.1039436    | 166.3483392         |
| ILF3      | 3609   | 6135   | 291.2044816          | 229.2979199               | 272.4832978    | 119.3455904         |
| SCD       | 6319   | 5473   | 310.3323692          | 538.902506                | 232.2086314    | 210.9728183         |
| NPM1      | 4869   | 1449   | 1152.828262          | 768.1499381               | 1187.219135    | 265.155267          |
| PKM2      | 5315   | 2853   | 579.9179917          | 1300.599322               | 496.9228001    | 1279.920876         |
| FLNA      | 2316   | 8557   | 190.0788974          | 131.0642634               | 173.1364668    | 109.0565687         |
| VIM       | 7431   | 2151   | 754.4519639          | 27.65984511               | 816.6534198    | 38.39654862         |
| PPIA      | 5478   | 2276   | 712.4779689          | 630.1191384               | 702.8281759    | 290.21326           |
| SRRM2     | 23524  | 9379   | 170.0857279          | 161.2026619               | 164.3826531    | 118.7076177         |
| RPS3      | 6188   | 855    | 1844.734572          | 1812.11188                | 1784.429546    | 700.3328382         |
| CANX      | 821    | 4953   | 313.614956           | 277.6298198               | 301.5489558    | 172.920759          |
| RPL7A     | 6130   | 890    | 1727.407591          | 1670.494014               | 1642.560971    | 571.5772276         |
| EIF4G2    | 1982   | 4028   | 378.4797486          | 307.4736996               | 417.0093974    | 244.7439331         |
| RPL6      | 6128   | 1148   | 1325.127394          | 1229.461869               | 1372.614765    | 487.2046588         |
| B2M       | 567    | 987    | 1508.771652          | 2577.815192               | 1696.70012     | 7927.951061         |
| HSPD1     | 3329   | 2339   | 632.2951312          | 412.3214449               | 630.8733533    | 165.041403          |
| GNB2L1    | 10399  | 1125   | 1286.270284          | 1257.964783               | 1190.331393    | 555.6447367         |
| MTRNR2L8  | 1E+08  | 1290   | 1110.656619          | 1421.465242               | 998.2795508    | 1059.534638         |
| YWHAZ     | 7534   | 3077   | 460.0515437          | 299.0896939               | 464.4556795    | 309.9918109         |
| RPL18     | 6141   | 648    | 2152.36298           | 2035.755391               | 2111.21733     | 1001.210657         |
| FTL       | 2512   | 889    | 1556.6915            | 3326.698979               | 1594.7365      | 6412.14486          |
| ACTG1     | 71     | 2123   | 633.4719669          | 553.5655108               | 777.9618368    | 448.5282013         |
| LDHB      | 3945   | 1539   | 867.2135655          | 688.3343621               | 840.0594248    | 365.1348431         |
| RPL5      | 6125   | 1035   | 1271.538682          | 1172.078392               | 1245.049043    | 301.002918          |
| RPS3A     | 6189   | 930    | 1408.286629          | 1428.285628               | 1345.179647    | 392.8861265         |
| RPS4X     | 6191   | 956    | 1353.737674          | 1313.221073               | 1273.454806    | 552.867951          |



|         |       |       |             |             |             |             |
|---------|-------|-------|-------------|-------------|-------------|-------------|
| HSPA5   | 3309  | 3973  | 323.8386428 | 248.5204194 | 386.4601965 | 309.9357597 |
| EIF3A   | 8661  | 5305  | 241.7189101 | 207.5431282 | 217.9757774 | 109.2085591 |
| HNRNPU  | 3192  | 6846  | 185.0999477 | 158.7105128 | 196.5942054 | 118.9853556 |
| PGK1    | 5230  | 2439  | 519.4710355 | 474.9926724 | 509.457024  | 345.349118  |
| FASN    | 2194  | 8481  | 143.7523278 | 218.4974185 | 116.3423931 | 41.05384321 |
| PRKDC   | 5591  | 13509 | 89.80948209 | 74.77241542 | 78.40480485 | 19.21043766 |
| RPL3    | 6122  | 1348  | 896.2363793 | 1090.855257 | 936.2046585 | 291.3293725 |
| RPLP1   | 6176  | 512   | 2346.449015 | 2576.938137 | 2288.643138 | 1335.160684 |
| RPL19   | 6143  | 748   | 1588.637943 | 1698.35446  | 1550.457293 | 934.4744168 |
| CFL1    | 1072  | 1260  | 943.0961754 | 1062.169131 | 946.4215818 | 832.3682055 |
| SERBP1  | 26135 | 6764  | 174.7737428 | 126.7682098 | 157.3078146 | 52.97147951 |
| TOP2A   | 7153  | 5753  | 203.6756303 | 168.683529  | 165.5608733 | 60.69699089 |
| MYH9    | 4627  | 7505  | 155.0938344 | 142.6663624 | 149.7714764 | 137.398085  |
| DIAPH1  | 1729  | 5804  | 197.871447  | 93.44844153 | 189.8068135 | 80.21819173 |
| RPL9    | 6133  | 842   | 1344.7736   | 1269.775797 | 1307.606759 | 493.3301981 |
| CCT5    | 22948 | 3403  | 328.0509109 | 231.6726531 | 314.536762  | 103.9210178 |
| PRRC2C  | 23215 | 10394 | 103.4122434 | 89.95631568 | 96.88119806 | 89.74333274 |
| HUWE1   | 10075 | 14734 | 71.85559593 | 58.90683501 | 59.22397614 | 34.29227921 |
| RPL41   | 6171  | 593   | 1779.503854 | 2052.465639 | 1727.333091 | 1147.324466 |
| ARHGDIB | 397   | 1216  | 865.9519225 | 1302.911504 | 926.8033858 | 925.4128694 |
| RPL7    | 6129  | 866   | 1215.224456 | 1181.064692 | 1270.392324 | 351.0948639 |
| HNRNPC  | 3183  | 3252  | 321.3488552 | 277.9241603 | 365.3303238 | 192.0957783 |
| RPL27A  | 6157  | 4906  | 209.3021012 | 256.3529704 | 221.1470138 | 128.281968  |
| NAP1L1  | 4673  | 5125  | 199.4809    | 173.1790406 | 193.9284912 | 57.19355972 |
| DNMT1   | 1786  | 5425  | 184.3808122 | 158.509001  | 182.3864585 | 96.04643193 |
| AHNAK   | 79026 | 18815 | 52.68524661 | 0.971154937 | 73.5313642  | 0.441115247 |
| EIF4G1  | 1981  | 5686  | 171.8195363 | 139.4761739 | 168.5521768 | 84.09021708 |
| ATP5B   | 506   | 1857  | 524.6682084 | 486.224038  | 504.7168559 | 328.2247207 |
| CSDE1   | 7812  | 4216  | 229.934439  | 179.8094861 | 219.1528134 | 117.347282  |
| HMG2    | 3151  | 1989  | 482.655521  | 632.5356149 | 377.5294328 | 301.7604719 |
| DDX21   | 9188  | 4153  | 231.0109975 | 163.0064282 | 240.0801322 | 77.25734355 |
| RPL13   | 6137  | 1296  | 739.7959215 | 800.7189914 | 670.5356663 | 331.4460241 |
| RPL10   | 6134  | 2335  | 409.9102462 | 469.0461009 | 376.2407014 | 191.7655867 |
| RPL15   | 6138  | 2018  | 473.7950912 | 573.3138252 | 470.4174593 | 264.3211367 |
| SET     | 6418  | 2936  | 322.1727472 | 239.0745766 | 336.2853167 | 110.9359811 |
| RPS8    | 6202  | 705   | 1331.264232 | 1537.387487 | 1272.203989 | 637.4355685 |
| RPS11   | 6205  | 641   | 1459.081287 | 1660.989965 | 1446.690823 | 1135.938565 |
| TPI1    | 7167  | 1602  | 573.7357039 | 563.0628638 | 571.4712054 | 481.8110203 |
| HNRNPK  | 3190  | 2995  | 305.0437967 | 270.077678  | 321.9006231 | 196.9541591 |
| EIF4B   | 1975  | 4041  | 224.1622115 | 237.555854  | 232.7217206 | 61.36484957 |
| RPL11   | 6135  | 644   | 1381.828223 | 1330.421852 | 1334.965363 | 733.0188019 |
| RPL8    | 6132  | 967   | 915.404854  | 881.1915062 | 797.5071137 | 371.5731455 |
| PRRC2A  | 7916  | 6958  | 125.5456284 | 105.4596193 | 104.1848256 | 76.16538707 |
| RPL23A  | 6147  | 979   | 886.8564268 | 850.8157054 | 842.3334255 | 402.3764732 |
| PAICS   | 10606 | 3350  | 259.1738632 | 150.2623985 | 253.2894333 | 41.75472964 |
| KPNB1   | 3837  | 4205  | 206.4275994 | 185.4201103 | 192.9449426 | 232.3719671 |
| HSPA9   | 3313  | 3506  | 247.0006258 | 174.0840626 | 265.7029415 | 107.5655937 |
| FTH1    | 2495  | 1245  | 692.614653  | 430.0939289 | 814.9312643 | 1530.004498 |
| HMGA1   | 3159  | 2198  | 391.383704  | 539.7457751 | 408.3428873 | 425.0269347 |
| PDIA3   | 2923  | 3060  | 280.0624845 | 236.8871645 | 266.9368913 | 225.4501846 |
| XPO1    | 7514  | 4830  | 175.5266719 | 133.2382595 | 155.6858107 | 98.49023353 |
| RPL14   | 9045  | 936   | 904.8891884 | 838.9555353 | 910.1497412 | 356.845752  |
| TPM3    | 7170  | 7116  | 118.909322  | 141.6972876 | 120.428751  | 136.7731834 |
| TUBA1B  | 10376 | 1771  | 476.8625897 | 490.7100342 | 443.328161  | 221.974507  |
| RPL37   | 6167  | 1586  | 525.0121366 | 582.2311763 | 503.5664552 | 414.8132438 |
| RPS7    | 6201  | 745   | 1108.349153 | 1086.64583  | 1104.06923  | 479.3080728 |
| NOLC1   | 9221  | 3936  | 208.1249394 | 122.1730014 | 186.5382484 | 40.83549725 |
| INSIG1  | 3638  | 3020  | 271.048544  | 291.6747029 | 170.6369314 | 179.3707408 |
| CENPF   | 1063  | 10316 | 78.83409874 | 54.90894577 | 63.36904339 | 17.34656018 |
| DMXL2   | 23312 | 10599 | 74.85867576 | 91.05466154 | 65.72373415 | 113.6573416 |
| LARP1   | 23367 | 6644  | 117.1436677 | 101.1869672 | 103.034712  | 139.0251207 |
| RN18S1  | 1E+08 | 1869  | 412.5997924 | 424.3239834 | 1135.104488 | 470.4927665 |

|          |        |       |             |             |             |             |
|----------|--------|-------|-------------|-------------|-------------|-------------|
| CAPRIN1  | 4076   | 5562  | 136.992383  | 103.6039775 | 120.9892062 | 62.49017578 |
| RPL29    | 6159   | 737   | 1030.250494 | 1085.440079 | 1027.468907 | 610.0332491 |
| NUCKS1   | 64710  | 6471  | 117.0853848 | 96.86730678 | 114.0173677 | 45.64112364 |
| PRPF8    | 10594  | 7311  | 103.3253012 | 97.80742516 | 101.3507944 | 50.33725521 |
| TPTE2P2  | 644623 | 70641 | 10.66762647 | 12.79440225 | 10.06459736 | 13.22187927 |
| ATP2A2   | 488    | 8329  | 90.37750713 | 65.5468937  | 87.03542037 | 56.75007744 |
| RPS18    | 6222   | 549   | 1365.552758 | 1420.609101 | 1312.736468 | 720.1157912 |
| GNAS     | 2778   | 3784  | 197.472471  | 154.228013  | 180.742276  | 198.042191  |
| RPL32    | 6161   | 1787  | 417.1216311 | 411.4985225 | 426.4712559 | 213.0770516 |
| ANPEP    | 290    | 3740  | 199.0305947 | 53.08661019 | 280.8279542 | 62.89367346 |
| SON      | 6651   | 8412  | 88.36810428 | 85.80064977 | 84.14217196 | 85.09135276 |
| PTGES3   | 10728  | 1932  | 381.584321  | 266.7763974 | 382.5435276 | 189.2269806 |
| MYC      | 4609   | 2379  | 307.7390727 | 155.4864467 | 227.892685  | 29.86655355 |
| RPL35    | 11224  | 475   | 1539.135417 | 1353.88448  | 1548.828503 | 697.2076206 |
| RPS15A   | 6210   | 554   | 1306.743334 | 1303.209203 | 1228.426383 | 713.6165512 |
| NONO     | 4841   | 3228  | 222.8746318 | 230.5641781 | 246.1061657 | 140.9100542 |
| MATR3    | 9782   | 5604  | 127.9784196 | 98.93071371 | 119.8562199 | 63.75570006 |
| RAVER1   | 125950 | 3606  | 197.1878754 | 216.900367  | 197.8084732 | 149.8287951 |
| GANAB    | 23193  | 3921  | 180.825202  | 178.3911751 | 166.1287731 | 95.25153077 |
| HNRNPD   | 3184   | 2257  | 312.329594  | 229.6450265 | 315.8505914 | 148.7946317 |
| NUCB2    | 4925   | 1612  | 434.6375832 | 290.9818867 | 373.9425708 | 76.72706902 |
| TMPO     | 7112   | 4186  | 167.1318331 | 139.4700511 | 156.0155751 | 66.83150707 |
| RHOA     | 387    | 1926  | 362.5042316 | 333.32345   | 350.7151516 | 227.6536434 |
| XRCC5    | 7520   | 3448  | 201.8965453 | 201.441264  | 189.4699774 | 132.2128188 |
| IPO7     | 10527  | 6209  | 112.0190256 | 89.64987059 | 95.00838359 | 35.56931704 |
| PFN1     | 5216   | 847   | 818.7512021 | 1182.828513 | 834.6621151 | 987.0498276 |
| YWHAG    | 7532   | 3779  | 183.4553803 | 133.3222282 | 174.104458  | 95.77740327 |
| BTF3     | 689    | 1262  | 548.2148802 | 572.0902524 | 537.4200348 | 276.3747471 |
| SLC43A3  | 29015  | 2867  | 239.6743275 | 180.3180428 | 288.3701678 | 110.0755484 |
| RPL12    | 6136   | 674   | 1019.201648 | 1047.710353 | 1000.938046 | 512.0789486 |
| AHRR     | 57491  | 5676  | 120.3775475 | 89.39218167 | 123.696135  | 132.8840633 |
| EIF4EBP2 | 1979   | 7531  | 90.48247036 | 76.19096577 | 105.9369617 | 39.16330545 |
| AK2      | 204    | 3789  | 179.1413207 | 153.3775777 | 153.0127699 | 76.50518125 |
| CNOT1    | 23019  | 8449  | 80.33689952 | 79.22705468 | 75.57137517 | 65.38387584 |
| PSIP1    | 11168  | 3396  | 198.6084672 | 109.1853909 | 157.2192556 | 55.8527222  |
| ADRBK1   | 156    | 3478  | 192.4567856 | 211.2361592 | 161.8958853 | 120.0138917 |
| STIP1    | 10963  | 2219  | 301.0988659 | 201.4431571 | 291.7424555 | 111.8421748 |
| SSRP1    | 6749   | 2825  | 235.5686241 | 157.9942894 | 225.4950639 | 62.98583028 |
| TFRC     | 7037   | 5241  | 126.7810403 | 104.2521929 | 154.9663466 | 64.54085671 |
| CKAP5    | 9793   | 6714  | 98.75316192 | 62.96002427 | 80.30960843 | 26.95433475 |
| YWHAE    | 7531   | 1860  | 354.5990131 | 281.8953265 | 322.379652  | 182.7301403 |
| IPO5     | 3843   | 6019  | 109.4768244 | 86.26020194 | 94.70780631 | 16.41224209 |
| EIF4H    | 7458   | 2546  | 257.8508923 | 234.9108114 | 270.7864008 | 156.393391  |
| VCP      | 7415   | 3859  | 169.7480354 | 156.6584798 | 176.6820225 | 112.7810457 |
| RAN      | 5901   | 1087  | 601.6888112 | 549.1892939 | 590.5088363 | 223.4725258 |
| HNRNPA3  | 220988 | 5808  | 111.4833644 | 79.64887285 | 104.2600079 | 39.41925689 |
| SYNCRIP  | 10492  | 7337  | 88.13927159 | 60.46883949 | 89.04081806 | 30.15602388 |
| PGAM1    | 5223   | 1762  | 363.0696402 | 609.0591429 | 360.6949842 | 602.8060408 |
| ACTR2    | 10097  | 3944  | 160.3374249 | 246.67533   | 174.3742135 | 219.7256497 |
| CCT6A    | 908    | 2682  | 235.7832975 | 165.8367035 | 248.4683584 | 79.17519658 |
| PPP1CC   | 5501   | 2526  | 250.1019974 | 183.6649444 | 243.738636  | 92.07868707 |
| CALM3    | 808    | 2277  | 277.0029489 | 304.7435135 | 252.5766888 | 225.8988761 |
| SNRNP200 | 23020  | 7230  | 86.39061266 | 89.1330739  | 76.76971896 | 45.97347067 |
| CCT7     | 10574  | 2044  | 304.9793603 | 205.4988311 | 296.5635912 | 98.14432641 |
| RPL26    | 6154   | 602   | 1035.511316 | 1104.539421 | 1058.178664 | 541.0432566 |
| MLEC     | 9761   | 6367  | 97.81131679 | 83.43538879 | 97.89383478 | 39.07414364 |
| IQGAP1   | 8826   | 7219  | 86.09756712 | 71.76700264 | 95.88154567 | 91.52622367 |
| CYTL1    | 54360  | 1019  | 609.3475746 | 0.874711226 | 14.09947377 | -           |
| PCBP2    | 5094   | 3187  | 194.7664865 | 191.9982906 | 198.5559649 | 135.1642988 |
| RPS14    | 6208   | 793   | 782.2345776 | 944.7206634 | 816.896694  | 472.759463  |
| APLP2    | 334    | 3827  | 162.0883251 | 528.1722716 | 155.6893198 | 688.6389775 |
| SLC38A2  | 54407  | 4961  | 124.9553009 | 76.94263031 | 112.7334738 | 63.57270076 |



|            |        |       |             |             |             |             |
|------------|--------|-------|-------------|-------------|-------------|-------------|
| TCP1       | 6950   | 2463  | 251.3543252 | 150.1836202 | 238.5639145 | 57.53154855 |
| RPS23      | 6228   | 3325  | 186.0682498 | 188.9889236 | 187.0108429 | 70.01299019 |
| HDGF       | 3068   | 2397  | 256.996208  | 261.5053576 | 247.248125  | 112.9108843 |
| WHSC1      | 7468   | 8390  | 73.17950522 | 49.40033297 | 59.91018442 | 20.72543424 |
| RPS27A     | 6233   | 1068  | 573.9270767 | 545.397601  | 538.8948408 | 232.7552844 |
| RPN1       | 6184   | 2372  | 255.9135409 | 187.2283055 | 289.6703389 | 181.8616808 |
| LRPPRC     | 10128  | 6637  | 91.06070497 | 81.11552905 | 91.33282814 | 29.2800525  |
| TOP2B      | 7155   | 5189  | 115.8017603 | 114.5297302 | 104.6040763 | 51.96285324 |
| HSPH1      | 10808  | 3680  | 162.6758386 | 108.7520385 | 159.2099574 | 71.18014909 |
| NACA       | 4666   | 3191  | 187.2205482 | 169.760657  | 182.8132956 | 110.6348909 |
| UBA1       | 7317   | 3616  | 164.9898298 | 148.20592   | 140.0579571 | 112.8585696 |
| CLTC       | 1213   | 8575  | 69.12185275 | 62.73097387 | 70.74035567 | 64.84805674 |
| SF3B1      | 23451  | 4314  | 136.6838421 | 128.1003844 | 146.5867619 | 127.1163166 |
| SAE1       | 10055  | 2587  | 226.9026187 | 166.7584374 | 221.7387426 | 84.43012877 |
| TMBIM6     | 7009   | 3255  | 179.646337  | 187.3026806 | 188.3712373 | 174.8164466 |
| HADHA      | 3030   | 3048  | 191.3773371 | 227.8771254 | 178.2888472 | 109.3833128 |
| HMGB2      | 3148   | 1527  | 381.3334596 | 281.9336915 | 347.5751935 | 144.0996556 |
| STMN1      | 3925   | 2265  | 256.9941751 | 169.5102498 | 229.2882752 | 53.80228499 |
| EIF3B      | 8662   | 3084  | 188.3480835 | 121.5319636 | 181.8939823 | 49.09753226 |
| CHD4       | 1108   | 6511  | 89.21294572 | 88.81136798 | 90.66650641 | 56.21124009 |
| SF3B3      | 23450  | 9736  | 59.53565865 | 54.33492128 | 55.85938535 | 27.71545546 |
| HNRNPH1    | 3187   | 2274  | 254.8086132 | 201.5685279 | 235.6280364 | 122.2228799 |
| TRIM28     | 10155  | 2989  | 193.8557332 | 137.0245817 | 193.5422137 | 64.06748222 |
| ACLY       | 47     | 4450  | 128.6943917 | 112.9185852 | 105.9747387 | 52.44954584 |
| PA2G4      | 5036   | 2643  | 215.9085059 | 141.5573506 | 208.6466996 | 42.20140124 |
| RPS25      | 6230   | 514   | 1107.423109 | 1077.313661 | 1112.327946 | 589.9580481 |
| GPI        | 2821   | 4275  | 132.7195327 | 178.3182724 | 134.8762839 | 133.2479112 |
| EIF3E      | 3646   | 1516  | 372.9103831 | 392.0150199 | 411.559301  | 160.7680416 |
| DDB1       | 1642   | 4355  | 129.7652709 | 110.0092473 | 121.773766  | 46.43546133 |
| NCAPD2     | 9918   | 4806  | 117.2052183 | 76.78129961 | 94.8715179  | 28.64162023 |
| TNRC18     | 84629  | 10586 | 52.55423667 | 16.60825508 | 49.33836483 | 19.82984422 |
| CTSC       | 1075   | 6143  | 90.43164655 | 120.5755891 | 105.8315498 | 184.7332257 |
| FADS2      | 9415   | 3149  | 176.2173535 | 408.8686099 | 152.9784871 | 157.9446543 |
| MBNL1      | 4154   | 6404  | 86.2353882  | 91.47831483 | 67.17298159 | 83.32331086 |
| DNAJA1     | 3301   | 1538  | 357.6093486 | 312.0816664 | 386.989059  | 332.2044539 |
| SPN        | 6693   | 6915  | 79.30124206 | 130.4127079 | 79.16685708 | 53.04426604 |
| DDX5       | 1655   | 3769  | 145.2774063 | 156.497245  | 153.2641384 | 166.1753521 |
| LMNB1      | 4001   | 3420  | 159.1463057 | 74.14725007 | 159.4520377 | 44.51067396 |
| SMC4       | 10051  | 5297  | 102.4438883 | 98.27018153 | 97.56513617 | 43.90990439 |
| ADAR       | 103    | 6730  | 80.60042942 | 71.38592397 | 66.68184742 | 192.3826163 |
| MYCBP2     | 23077  | 15025 | 35.96652435 | 27.19967679 | 31.13374121 | 32.46945489 |
| INPP5D     | 3635   | 4928  | 109.575539  | 65.3395352  | 83.43347111 | 100.9268905 |
| RPL22      | 6146   | 2099  | 256.9676501 | 249.6915076 | 255.5750401 | 103.5772267 |
| SUPT16H    | 11198  | 4684  | 114.8035884 | 86.77344513 | 117.8214767 | 40.32154764 |
| C17orf76-A | 125144 | 1391  | 385.262784  | 525.763387  | 410.7217791 | 247.9789953 |
| RPS27      | 6232   | 361   | 1481.09201  | 1940.064067 | 1552.152873 | 1640.17846  |
| PDS5A      | 23244  | 7190  | 73.88034085 | 60.15552727 | 80.81127868 | 46.03215451 |
| MDH2       | 4191   | 1321  | 400.8815756 | 396.7467634 | 345.3170324 | 209.9375793 |
| RPS20      | 6224   | 1013  | 520.7509375 | 528.8151768 | 493.0673009 | 351.103171  |
| GNAI2      | 2771   | 2200  | 239.1318166 | 317.3340006 | 227.7073496 | 335.2037944 |
| DYNC1H1    | 1778   | 14361 | 36.60477851 | 33.90358723 | 27.98298281 | 23.27205994 |
| RPL23      | 9349   | 594   | 884.6411415 | 926.5938238 | 930.862324  | 455.294547  |
| KHSRP      | 8570   | 3262  | 161.027729  | 129.587248  | 150.4642859 | 77.32261289 |
| PTBP1      | 5725   | 3340  | 157.1448142 | 148.6440783 | 180.5409308 | 92.60817443 |
| MAT2A      | 4144   | 2835  | 182.830096  | 146.9831113 | 183.4860961 | 91.03943572 |
| ARPC2      | 10109  | 1462  | 353.2721249 | 428.8995724 | 360.4269459 | 436.0112787 |
| RPLP2      | 6181   | 511   | 1009.131706 | 972.8761637 | 897.6501309 | 602.9290204 |
| CCT3       | 7203   | 2269  | 227.1758113 | 144.6595613 | 223.0176304 | 56.02702774 |
| U2SURP     | 23350  | 7464  | 69.03235928 | 53.2601165  | 61.48318618 | 30.40229842 |
| BSG        | 682    | 2024  | 253.6650465 | 234.6128711 | 224.4378641 | 163.4233014 |
| ARF1       | 375    | 2020  | 253.964991  | 201.2112955 | 230.9488877 | 194.1112414 |
| TKT        | 7086   | 2957  | 173.213303  | 869.3262939 | 166.9128179 | 493.784034  |

|          |        |       |             |             |             |             |
|----------|--------|-------|-------------|-------------|-------------|-------------|
| RSL1D1   | 26156  | 5137  | 99.70639228 | 67.58289329 | 98.38293735 | 28.01769935 |
| RPL10A   | 4736   | 719   | 712.0825465 | 811.6812258 | 754.9242725 | 329.9674929 |
| MCM7     | 4176   | 2900  | 176.2654504 | 146.9927331 | 182.7248902 | 43.76651623 |
| PARP1    | 142    | 4001  | 127.6072601 | 75.46570553 | 132.2312028 | 43.2077603  |
| ATP1A1   | 476    | 3778  | 135.0312005 | 134.3012237 | 121.3013889 | 90.17675393 |
| SLC1A5   | 6510   | 2873  | 177.3528426 | 190.3346357 | 195.1056289 | 87.36922731 |
| MYB      | 4602   | 3681  | 138.3118567 | 78.33346755 | 141.8322862 | 33.71064738 |
| SCAF11   | 9169   | 7596  | 66.99862539 | 78.41387129 | 73.54356359 | 97.77665853 |
| CCT4     | 10575  | 2349  | 215.9584798 | 139.2585701 | 197.1631319 | 60.32362881 |
| UBC      | 7316   | 2594  | 195.3251005 | 271.625655  | 201.7549552 | 451.8362053 |
| PCM1     | 5108   | 8788  | 57.58536096 | 34.20588208 | 52.4845965  | 25.89099249 |
| RPL36    | 25873  | 557   | 899.7394687 | 848.1244015 | 890.6582041 | 543.3234293 |
| TPM4     | 7171   | 2645  | 189.0861827 | 73.46317622 | 179.1726729 | 220.8732319 |
| EIF2S3   | 1968   | 3486  | 143.4690055 | 132.5745807 | 142.6141834 | 58.64978531 |
| SLC7A5   | 8140   | 4543  | 109.5488266 | 23.9362426  | 93.06203114 | 7.441254703 |
| HMGCS1   | 3157   | 3510  | 141.731035  | 142.460554  | 81.0225894  | 74.80063682 |
| CBX5     | 23468  | 11723 | 42.27897786 | 39.91714049 | 40.04732063 | 10.23972667 |
| HDLBP    | 3069   | 6516  | 76.06452693 | 72.19149747 | 78.37250893 | 43.49300309 |
| SLC25A5  | 292    | 1351  | 366.4125085 | 393.2147449 | 356.4159668 | 156.2792776 |
| EIF5B    | 9669   | 4698  | 105.1514194 | 70.43561874 | 97.50220575 | 41.70948049 |
| SF3B2    | 10992  | 2902  | 169.8053243 | 145.4324965 | 166.6543138 | 101.9817359 |
| MCM4     | 4173   | 4928  | 99.95346286 | 71.76044454 | 96.51014566 | 20.04571533 |
| ASPM     | 259266 | 10906 | 45.12762632 | 34.32595914 | 33.80633675 | 10.15299725 |
| PTPN11   | 5781   | 6300  | 78.08849309 | 57.33520349 | 70.6965519  | 35.28045897 |
| NUP210   | 23225  | 7191  | 68.41294764 | 74.12262299 | 89.0269541  | 67.75779073 |
| SH3KBP1  | 30011  | 4766  | 103.2223052 | 59.56543021 | 101.9628517 | 54.23870289 |
| KCNAB2   | 8514   | 4298  | 114.1290841 | 104.5727141 | 103.2827556 | 53.26827455 |
| CAPZA1   | 829    | 2758  | 177.5595572 | 222.6710947 | 189.451492  | 227.3104382 |
| KIAA0100 | 9703   | 7456  | 65.43317907 | 62.82112437 | 62.17258133 | 39.04140356 |
| MTRNR2L1 | 1E+08  | 1555  | 312.2968072 | 420.4444354 | 307.0762448 | 325.7086914 |
| DOCK8    | 81704  | 7470  | 64.76332795 | 74.51620435 | 59.8498735  | 143.0009518 |
| UBB      | 7314   | 971   | 497.5992804 | 499.3655221 | 497.6398035 | 425.496714  |
| PRRC2B   | 84726  | 11062 | 43.6597826  | 34.28505057 | 33.48238896 | 21.83128128 |
| DHX9     | 1660   | 4680  | 103.0665292 | 80.27690309 | 111.4211092 | 47.27665539 |
| TFDP1    | 7027   | 2651  | 180.9484483 | 137.5998132 | 185.4619539 | 54.59699623 |
| SLC25A3  | 5250   | 1919  | 248.9059274 | 239.3216067 | 270.7395665 | 117.1956575 |
| EEF1B2   | 1933   | 1128  | 422.9054222 | 424.5278719 | 377.9899365 | 87.75506559 |
| SMC1A    | 8243   | 9725  | 48.6953986  | 40.14425333 | 48.40539314 | 21.16916747 |
| CSE1L    | 1434   | 3579  | 131.9173088 | 79.69428233 | 123.6184103 | 34.21890531 |
| PNP      | 4860   | 2438  | 193.0686403 | 190.5685593 | 144.380809  | 65.09607406 |
| PDIA4    | 9601   | 2970  | 156.6960622 | 95.88557949 | 149.9623828 | 89.08233127 |
| RPL24    | 6152   | 579   | 803.4247296 | 666.1889072 | 807.1880693 | 370.944773  |
| NUSAP1   | 51203  | 2437  | 189.7931466 | 140.4476831 | 161.9531942 | 59.39131597 |
| TGOLN2   | 10618  | 6431  | 71.50814463 | 80.11027323 | 70.6363298  | 85.61755672 |
| IARS     | 3376   | 4510  | 101.5586259 | 72.08711464 | 98.19353876 | 24.5966778  |
| MRPL4    | 51073  | 2404  | 190.4430185 | 141.8194707 | 173.3167843 | 66.10093903 |
| YWHAQ    | 10971  | 2166  | 209.7647514 | 145.2630429 | 209.1387481 | 89.71916364 |
| ARHGDI1A | 396    | 2126  | 213.4229977 | 199.6689861 | 195.9800326 | 107.9747557 |
| CLIC1    | 1192   | 1265  | 358.5240371 | 346.6677657 | 355.0920179 | 419.4198022 |
| ESYT2    | 57488  | 5957  | 76.10013777 | 54.09032435 | 73.17113693 | 28.91840899 |
| SRSF1    | 6426   | 5668  | 79.90821249 | 85.82282124 | 90.84350096 | 40.75005869 |
| HK2      | 3099   | 7109  | 63.45200069 | 24.51190877 | 68.7737991  | 70.30480555 |
| POLR2A   | 5430   | 6738  | 66.91538835 | 50.49948198 | 65.5051746  | 66.36470143 |
| XRCC6    | 2547   | 2156  | 208.9365094 | 177.7700453 | 217.1646712 | 88.82082762 |
| TMSB4X   | 7114   | 657   | 684.7092174 | 661.3755483 | 858.0026534 | 894.44595   |
| SUB1     | 10923  | 3522  | 127.4947221 | 84.59037464 | 134.7375281 | 107.5942168 |
| RPS5     | 6193   | 755   | 594.2087932 | 547.1944338 | 565.2916794 | 242.3784001 |
| CHST11   | 50515  | 5768  | 77.60154439 | 28.70400221 | 71.06318257 | 38.70995767 |
| YWHAB    | 7529   | 3110  | 143.2674747 | 144.8770703 | 159.1769119 | 105.1198115 |
| TPR      | 7175   | 9727  | 45.72265875 | 41.62506304 | 42.11793485 | 28.09488691 |
| HNRNPUL1 | 11100  | 4201  | 105.8176423 | 109.7985378 | 97.92226383 | 76.51917029 |
| HNRNPA1  | 3178   | 1941  | 228.6050339 | 213.074427  | 236.5387874 | 80.92982878 |

|         |        |       |             |             |             |             |
|---------|--------|-------|-------------|-------------|-------------|-------------|
| CCDC88A | 55704  | 9827  | 44.92460802 | 33.10631116 | 33.82018211 | 31.35206364 |
| GNB1    | 2782   | 3180  | 138.8283406 | 148.6952695 | 134.8767502 | 135.6528009 |
| TMED2   | 10959  | 2126  | 206.9818532 | 150.9308871 | 224.900007  | 117.4963391 |
| MORF4L1 | 10933  | 1969  | 223.2781348 | 201.6698041 | 216.3281254 | 122.855506  |
| KIF20B  | 9585   | 6319  | 69.54110797 | 36.56868082 | 61.35583749 | 23.89807434 |
| CDC37   | 11140  | 1693  | 258.4706354 | 222.1745847 | 238.9901465 | 171.8194188 |
| BNIP3   | 664    | 1535  | 284.9422799 | 194.6701174 | 303.7820641 | 209.1545125 |
| CYCS    | 54205  | 5544  | 78.81991834 | 66.39963838 | 78.12658023 | 41.73452207 |
| ANP32B  | 10541  | 1617  | 269.8605249 | 248.4646448 | 260.1533456 | 104.6570992 |
| ATXN2L  | 11273  | 4386  | 99.39710361 | 92.61832747 | 88.30026621 | 82.15307252 |
| TUBB4B  | 10383  | 1591  | 273.6282451 | 148.461751  | 254.1791535 | 64.63473437 |
| SURF4   | 6836   | 2985  | 145.8433963 | 105.1083484 | 150.9783571 | 87.00711262 |
| SACS    | 26278  | 15639 | 27.69322144 | 9.874227925 | 19.50861279 | 1.656812741 |
| PRPF40A | 55660  | 7528  | 57.47682223 | 48.13043908 | 53.66318594 | 38.26464824 |
| LARS    | 51520  | 4868  | 88.88363142 | 60.83497083 | 81.94445962 | 24.40956092 |
| HMGN1   | 3150   | 1313  | 329.072627  | 300.5610698 | 321.5132926 | 201.657999  |
| CS      | 1431   | 2997  | 144.168288  | 144.7631756 | 147.9063828 | 58.3578704  |
| BAHCC1  | 57597  | 10342 | 41.7388887  | 17.36638406 | 29.84790527 | 9.160385599 |
| RPL27   | 6155   | 514   | 838.6195105 | 878.3249402 | 880.9012521 | 459.6001616 |
| RTN3    | 10313  | 4942  | 87.05643135 | 79.04202678 | 87.25863981 | 76.59691901 |
| KDELR1  | 10945  | 1575  | 272.7744287 | 282.6791772 | 262.5297003 | 208.8551761 |
| CBX3    | 11335  | 2330  | 184.0352706 | 125.0923398 | 205.4812314 | 78.97332035 |
| EIF3G   | 8666   | 1127  | 379.2116037 | 312.993913  | 378.3253313 | 211.2301179 |
| BZW1    | 9689   | 3400  | 125.5772662 | 101.3233325 | 132.9851145 | 75.1368309  |
| TAOK3   | 51347  | 4399  | 96.6873416  | 104.9071357 | 101.2476192 | 94.65700639 |
| CCT2    | 10576  | 2193  | 193.9478412 | 123.2540112 | 206.3711623 | 42.55344543 |
| SRP72   | 6731   | 3893  | 108.8869542 | 74.92627391 | 102.9558675 | 39.88259386 |
| RAB7A   | 7879   | 2240  | 188.0535234 | 156.281316  | 204.9650832 | 182.4570867 |
| RPN2    | 6185   | 2538  | 165.812104  | 178.6700211 | 168.578267  | 151.0639348 |
| DDX3X   | 1654   | 5433  | 77.38309363 | 101.429271  | 94.61730616 | 115.6896042 |
| SMC3    | 9126   | 4131  | 101.3767268 | 89.3272636  | 96.71737684 | 51.20749499 |
| GLUL    | 2752   | 4737  | 88.36454975 | 66.75101956 | 91.12408011 | 110.9363159 |
| ARHGEF6 | 9459   | 5282  | 79.2470413  | 91.67274213 | 80.64181729 | 63.65663411 |
| RPL38   | 6169   | 411   | 1017.952521 | 975.3673962 | 998.3333493 | 541.7804118 |
| KIF11   | 3832   | 5101  | 81.93877939 | 66.44354313 | 66.52094231 | 28.01701181 |
| GSPT1   | 2935   | 7190  | 57.6488385  | 38.39912328 | 51.83676204 | 17.37115556 |
| HNRNPR  | 10236  | 2760  | 150.0312958 | 115.1302204 | 155.3249206 | 61.02203405 |
| HSPA4   | 3308   | 3385  | 121.9675213 | 72.8732     | 120.6538977 | 51.19028263 |
| RAC1    | 5879   | 2398  | 171.9128027 | 136.413003  | 164.763346  | 137.2599379 |
| DEK     | 7913   | 2879  | 143.1200121 | 134.4426445 | 130.9980198 | 106.663628  |
| DDX17   | 10521  | 4811  | 85.64591868 | 104.9087572 | 85.37467805 | 113.6900411 |
| DHX15   | 1665   | 3019  | 136.4154119 | 114.184221  | 136.1908399 | 77.31052633 |
| TPX2    | 22974  | 3685  | 111.7052218 | 89.55636529 | 85.4312875  | 31.03726121 |
| NCOA4   | 8031   | 3748  | 109.6639765 | 126.3986894 | 135.1252863 | 110.0720445 |
| RPL13A  | 23521  | 1142  | 359.5550014 | 458.7387407 | 370.3958776 | 205.6195105 |
| ANP32A  | 8125   | 2479  | 164.8115974 | 155.8660247 | 180.2611014 | 109.5843219 |
| CCND2   | 894    | 6531  | 62.43307384 | 71.82097709 | 44.67681143 | 24.54810281 |
| BCAT1   | 586    | 9682  | 42.11427445 | 15.65030217 | 36.44345708 | 2.488022587 |
| MAZ     | 4150   | 2789  | 146.1994999 | 124.3197051 | 132.7253144 | 45.79871371 |
| THOC2   | 57187  | 5625  | 72.48896093 | 53.63830314 | 64.11788225 | 45.12814118 |
| ITGA4   | 3676   | 6082  | 66.67250204 | 80.56709532 | 87.78635185 | 63.33806745 |
| STAT1   | 6772   | 4326  | 93.68880518 | 47.95590141 | 61.34388818 | 460.4484539 |
| STAG2   | 10735  | 6277  | 64.56870658 | 58.85878466 | 64.05526539 | 60.30619304 |
| TAGLN2  | 8407   | 1360  | 297.8627831 | 356.368448  | 340.2306084 | 181.8882872 |
| HNRNPL  | 3191   | 2129  | 190.2740183 | 153.3348441 | 187.4668456 | 95.4619908  |
| SRSF11  | 9295   | 2811  | 143.891934  | 119.858776  | 135.4447314 | 74.24552035 |
| RPS13   | 6207   | 529   | 764.2265414 | 722.4159817 | 733.7053055 | 329.8557275 |
| BOD1L   | 259282 | 10542 | 38.34906473 | 35.74369853 | 40.3449274  | 41.87984729 |
| UBR4    | 23352  | 15882 | 25.44210139 | 21.62102803 | 20.81983702 | 26.37106897 |
| RPL28   | 6158   | 4439  | 90.65923967 | 98.74113334 | 88.81670752 | 97.26982759 |
| HAUS6   | 54801  | 6334  | 63.40682352 | 36.83388395 | 59.50931706 | 47.07573652 |
| CDC42   | 998    | 2308  | 173.6573984 | 198.2129557 | 190.8703325 | 190.1498158 |



|         |        |       |             |             |             |             |
|---------|--------|-------|-------------|-------------|-------------|-------------|
| LUC7L3  | 51747  | 3525  | 113.2966163 | 97.03494215 | 110.6472821 | 54.89985617 |
| CCT8    | 10694  | 1895  | 210.6417869 | 154.6305965 | 210.5042899 | 100.4132618 |
| PRKCB   | 5579   | 8014  | 49.70659365 | 89.08858521 | 45.55778233 | 71.58515069 |
| UBAP2L  | 9898   | 4006  | 99.43800337 | 88.55457666 | 97.20364832 | 86.10553731 |
| TM9SF3  | 56889  | 6140  | 64.81105361 | 58.35748486 | 67.68682827 | 52.45347247 |
| RPL37A  | 6168   | 434   | 915.9702692 | 929.8386914 | 929.8476825 | 586.297421  |
| BRD2    | 6046   | 4907  | 80.97141037 | 84.14692578 | 78.75276718 | 115.2611052 |
| ACTN1   | 87     | 3809  | 104.2589458 | 73.24403289 | 90.41589945 | 49.26530742 |
| IRF2BP2 | 359948 | 4677  | 84.77852598 | 76.23098045 | 73.72604886 | 66.6972157  |
| IKZF1   | 10320  | 6217  | 63.77821554 | 53.76371676 | 96.17755745 | 57.99031766 |
| GHITM   | 27069  | 2449  | 161.8231032 | 164.8725295 | 175.1360006 | 120.1843882 |
| RCC2    | 55920  | 4109  | 95.90083524 | 84.1655699  | 98.5721313  | 57.98461224 |
| SMARCC1 | 6599   | 5780  | 68.17587059 | 53.04805782 | 65.35936909 | 23.39489281 |
| KPNA2   | 3838   | 2011  | 195.6456357 | 159.7835561 | 177.243855  | 97.64097318 |
| VDAC1   | 7416   | 2074  | 189.5055936 | 163.8475623 | 188.1595729 | 81.40099889 |
| ZFR     | 51663  | 4746  | 82.81386455 | 68.69031137 | 79.955211   | 53.78482853 |
| SMARCA4 | 6597   | 5779  | 67.97546547 | 46.07805127 | 61.53179674 | 22.76843068 |
| RPL30   | 6156   | 571   | 686.8950201 | 678.2543014 | 668.6367142 | 371.5331845 |
| CALM2   | 805    | 1309  | 299.3187809 | 221.9815286 | 286.8243093 | 152.0149521 |
| HNRNPH3 | 3189   | 2427  | 161.1846418 | 126.2443105 | 140.5082838 | 66.30858923 |
| BAZ1B   | 9031   | 6133  | 63.68530362 | 80.98712772 | 63.7333782  | 82.25219737 |
| SEPT2   | 4735   | 3598  | 107.6464115 | 87.6962428  | 101.2968909 | 72.014715   |
| LRRC59  | 55379  | 2933  | 131.7743756 | 87.82631557 | 138.5993457 | 54.45495154 |
| SLC20A1 | 6574   | 3390  | 113.9498105 | 21.56021256 | 123.4675847 | 25.79624448 |
| ZC3H13  | 23091  | 6409  | 60.14546933 | 47.66790619 | 62.80191456 | 38.97600513 |
| IQGAP2  | 10788  | 5769  | 66.78244527 | 22.78926746 | 96.98076757 | 31.6152549  |
| THRAP3  | 9967   | 4447  | 86.3137449  | 84.33267561 | 92.07777547 | 65.09405757 |
| IGF2BP1 | 10642  | 8769  | 43.65552432 | 37.1514865  | 44.74350574 | 30.21774223 |
| RRM2    | 6241   | 3452  | 110.5414182 | 129.4262842 | 99.46052642 | 61.10396153 |
| EPRS    | 2058   | 5021  | 75.79506969 | 62.70913833 | 74.35574055 | 24.35113189 |
| SUMO2   | 6613   | 1066  | 356.8130007 | 357.243019  | 362.3157071 | 268.7024776 |
| NCAPD3  | 23310  | 5661  | 67.15390789 | 45.4246455  | 60.72430785 | 19.88172546 |
| NIPBL   | 25836  | 10389 | 36.55303689 | 41.65377551 | 37.35971765 | 46.14029719 |
| NUP205  | 23165  | 6286  | 60.37943272 | 43.74411915 | 53.44301154 | 38.96578495 |
| ANAPC5  | 51433  | 2625  | 144.1214465 | 111.2890094 | 151.4811127 | 46.57791742 |
| PSMA4   | 5685   | 1235  | 304.5105662 | 341.1956331 | 304.6948664 | 564.3421661 |
| ILF2    | 3608   | 1637  | 229.606697  | 155.179756  | 230.5159339 | 73.57677059 |
| TACC3   | 10460  | 2788  | 134.7423877 | 116.611509  | 117.9193288 | 60.40918722 |
| FUS     | 2521   | 5119  | 73.26599304 | 97.46481366 | 76.85333574 | 63.07365431 |
| ZYX     | 7791   | 2325  | 161.3112337 | 152.2929617 | 182.5682088 | 180.9235171 |
| SFPQ    | 6421   | 3073  | 122.0464101 | 144.0834834 | 138.1292176 | 86.68935361 |
| HYOU1   | 10525  | 4622  | 80.9673461  | 47.68098771 | 64.63796031 | 37.05210257 |
| RPL34   | 6164   | 1003  | 372.2966391 | 375.0165223 | 372.8554612 | 227.8586104 |
| GCN1L1  | 10985  | 8699  | 42.87903859 | 40.88297101 | 39.63866313 | 23.08419727 |
| OGT     | 8473   | 5497  | 67.81887766 | 75.11532924 | 66.64867677 | 68.20051923 |
| RASSF2  | 9770   | 5426  | 68.66862962 | 65.09211303 | 79.12470237 | 65.25029143 |
| FKBP4   | 2288   | 3757  | 99.11940329 | 45.49179377 | 97.51604371 | 13.25459151 |
| UBE2K   | 3093   | 5259  | 70.77147975 | 50.29518859 | 65.08486659 | 39.60815744 |
| CORO1A  | 11151  | 1943  | 190.8165254 | 388.4376239 | 224.8774506 | 420.1727248 |
| ODC1    | 4953   | 2062  | 179.7052001 | 139.5135771 | 212.0020229 | 45.8459161  |
| TARS    | 6897   | 2850  | 129.8748598 | 133.3086763 | 139.2996725 | 90.63130847 |
| ATP5A1  | 498    | 1950  | 189.7122893 | 203.4062456 | 192.3233084 | 128.2049465 |
| H3F3B   | 3021   | 2753  | 133.9312195 | 90.65477912 | 155.1826326 | 138.0898673 |
| OAZ1    | 4946   | 1146  | 321.5604372 | 458.4986655 | 277.6569377 | 382.2478704 |
| HNRPDL  | 9987   | 4262  | 86.46369333 | 58.40077636 | 89.92739491 | 33.67481554 |
| MCM6    | 4175   | 3769  | 97.71925572 | 65.03474482 | 89.8618924  | 21.32243529 |
| SSB     | 6741   | 1673  | 220.145771  | 171.8195836 | 231.4913136 | 265.8315672 |
| TM7SF3  | 51768  | 4346  | 84.51034146 | 144.3336419 | 90.76591106 | 77.4595488  |
| FSCN1   | 6624   | 2819  | 130.0705163 | 38.57479608 | 139.7822206 | 20.03464092 |
| MLL2    | 8085   | 19432 | 18.84829215 | 23.39330367 | 17.05978749 | 22.3138444  |
| TMEM123 | 114908 | 3605  | 101.5977845 | 135.4303501 | 120.9685846 | 322.594679  |
| ACTR3   | 10096  | 2728  | 134.1096924 | 198.0825735 | 156.5273104 | 207.1037231 |

|           |        |       |             |             |             |             |
|-----------|--------|-------|-------------|-------------|-------------|-------------|
| LOC647979 | 647979 | 5378  | 67.98937423 | 69.69218589 | 68.08413749 | 51.83052144 |
| CENPE     | 1062   | 8630  | 42.29822667 | 29.66799012 | 32.46391582 | 11.65783834 |
| RBBP4     | 5928   | 7943  | 45.87945834 | 36.47016117 | 45.48620697 | 23.16603757 |
| WASF2     | 10163  | 5676  | 64.16775043 | 63.87399191 | 60.48938288 | 65.33644766 |
| RPS15     | 6209   | 531   | 685.1363072 | 659.6854622 | 625.4983896 | 427.7310438 |
| KTN1      | 3895   | 4930  | 73.21419326 | 58.98512243 | 80.74249298 | 45.82365336 |
| SLC25A6   | 293    | 1502  | 240.1741589 | 313.7757179 | 242.9352749 | 132.2121934 |
| RPL35A    | 6165   | 511   | 704.7523055 | 703.3837974 | 722.7510036 | 341.0787691 |
| UBA52     | 7311   | 2823  | 127.5694042 | 140.8195216 | 138.0124336 | 95.08348292 |
| GLTSCR2   | 29997  | 1523  | 236.3257005 | 295.1106534 | 271.2158296 | 151.655504  |
| PEBP1     | 5037   | 1507  | 238.2923008 | 145.3513796 | 218.1546707 | 38.28283075 |
| ANKRD17   | 26057  | 9390  | 38.1999707  | 31.53830011 | 38.54428075 | 29.51279163 |
| HNRNPAB   | 3182   | 1837  | 194.483953  | 197.6017656 | 195.067477  | 90.36018923 |
| MORF4L2   | 9643   | 2047  | 174.3323153 | 125.7311924 | 139.1362278 | 80.79354227 |
| SBNO1     | 55206  | 10981 | 32.49779159 | 27.13116287 | 33.59468112 | 17.8814313  |
| LAPTM5    | 7805   | 2240  | 159.2204747 | 625.5231793 | 154.879276  | 792.1836664 |
| GTF3A     | 2971   | 1404  | 253.8813939 | 241.7195006 | 275.5430186 | 104.3863937 |
| RBMX      | 27316  | 2132  | 166.9984544 | 175.1724107 | 167.3827214 | 86.68740707 |
| STT3B     | 201595 | 2481  | 143.424554  | 97.53982089 | 137.9610292 | 72.04541958 |
| TPP2      | 7174   | 4716  | 75.40965488 | 71.159038   | 72.71313988 | 50.60721574 |
| TRIP12    | 9320   | 6428  | 55.19825571 | 71.30784576 | 54.23457627 | 93.97133277 |
| SRRM1     | 10250  | 3952  | 89.72925141 | 80.51747819 | 87.67889895 | 62.23458211 |
| MTDH      | 92140  | 7667  | 46.19815172 | 48.0425757  | 48.72198488 | 32.42241342 |
| ITM2B     | 9445   | 1896  | 186.4915985 | 498.3178182 | 307.5664248 | 1066.915415 |
| NUFIP2    | 57532  | 10897 | 32.33566612 | 28.19916236 | 28.54099006 | 33.64216489 |
| BAG6      | 7917   | 3832  | 91.89910426 | 93.04078695 | 86.34445102 | 73.37518023 |
| GARS      | 2617   | 2759  | 127.6394953 | 78.18123916 | 116.7847992 | 46.73692849 |
| SF1       | 7536   | 3586  | 97.97541073 | 121.1101234 | 105.2299453 | 75.69913698 |
| PAPOLA    | 10914  | 4539  | 77.40467567 | 68.63187779 | 81.46030676 | 57.3972123  |
| HCFC1     | 3054   | 8436  | 41.57499578 | 40.41417824 | 42.20185193 | 26.82734338 |
| TCERG1    | 10915  | 4233  | 82.6622064  | 62.16995055 | 70.57799494 | 27.64088892 |
| XPOT      | 11260  | 3961  | 87.92578398 | 55.91913371 | 86.89292508 | 21.77094058 |
| LAMP1     | 3916   | 2560  | 136.0445431 | 119.9466561 | 151.5307898 | 140.672245  |
| PDIA6     | 10130  | 2344  | 148.2322891 | 102.5752845 | 153.3256737 | 74.18361488 |
| CPT1A     | 1374   | 5260  | 65.97865273 | 44.56653695 | 62.18038224 | 18.08775011 |
| KHDRBS1   | 10657  | 2685  | 129.2542694 | 111.8727967 | 129.9184883 | 74.11082767 |
| AHCTF1    | 25909  | 8643  | 40.10632199 | 23.4099361  | 35.78860241 | 12.85820268 |
| DNM2      | 1785   | 3684  | 94.03760989 | 94.48009054 | 96.00724498 | 98.24723316 |
| MRFAP1    | 93621  | 1534  | 225.7041517 | 201.6243588 | 213.9017173 | 161.6527752 |
| CDV3      | 55573  | 4213  | 82.13287028 | 69.76413747 | 88.41562646 | 52.084711   |
| WDR1      | 9948   | 3160  | 109.5018299 | 164.44488   | 135.7972628 | 207.361465  |
| GSN       | 2934   | 2797  | 123.3478197 | 137.5874317 | 106.4355484 | 125.278642  |
| RPS12     | 6206   | 532   | 647.7351115 | 618.2350426 | 636.6343467 | 372.8952739 |
| ARPC3     | 10094  | 912   | 377.1731588 | 531.1822989 | 431.6047263 | 576.8778671 |
| HNRNPF    | 3185   | 2773  | 123.8994405 | 143.8407882 | 132.1196452 | 120.8149182 |
| MCM3      | 4172   | 3143  | 109.0536442 | 85.99937849 | 113.4739666 | 33.62006569 |
| UBE2D3    | 7323   | 2623  | 130.4393615 | 126.4955652 | 136.6141652 | 168.3948833 |
| VDAC2     | 7417   | 1963  | 174.0874544 | 135.5385765 | 175.8733062 | 71.36055688 |
| NAA50     | 80218  | 6148  | 55.58452716 | 38.96309956 | 52.51189254 | 16.16665122 |
| PTP4A2    | 8073   | 3939  | 86.70456634 | 108.616084  | 91.40117628 | 117.3768781 |
| PPM1G     | 5496   | 2265  | 150.7855571 | 108.5141065 | 151.0242952 | 52.55106906 |
| GDI2      | 2665   | 2441  | 139.829947  | 144.7819082 | 142.9050148 | 90.64102712 |
| EIF2S2    | 8894   | 2592  | 131.2108733 | 110.2987402 | 124.064586  | 92.31131019 |
| SRPK1     | 6732   | 4408  | 76.9230156  | 62.02715612 | 71.37091871 | 40.45821875 |
| PPP6R1    | 22870  | 3654  | 92.74008391 | 74.27756158 | 100.669614  | 55.84244495 |
| SEPT7     | 989    | 2534  | 132.762286  | 110.7128453 | 141.3289939 | 81.32303966 |
| NUDT21    | 11051  | 4407  | 76.15205081 | 57.23771253 | 73.30483325 | 29.62709703 |
| RPS16     | 6217   | 603   | 554.5203498 | 530.2900541 | 578.8431605 | 239.0204816 |
| CHSY1     | 22856  | 4567  | 73.03661621 | 57.37929434 | 76.42706936 | 52.79018519 |
| TNPO1     | 3842   | 8559  | 38.8283572  | 30.72117864 | 35.84361181 | 19.46476857 |
| PCNX      | 22990  | 12936 | 25.67466938 | 26.69995836 | 26.88425458 | 38.71436356 |
| HNRNPM    | 4670   | 2553  | 129.6126933 | 130.0511948 | 156.1669975 | 104.8221531 |

|          |       |       |             |             |             |             |
|----------|-------|-------|-------------|-------------|-------------|-------------|
| ATRX     | 546   | 11202 | 29.48473911 | 28.38620256 | 28.87671573 | 22.87760583 |
| ARL6IP1  | 23204 | 2280  | 144.5942496 | 117.1826268 | 124.1761317 | 124.5647784 |
| PPP5C    | 5536  | 2232  | 147.6122325 | 121.1003793 | 145.116281  | 56.77440332 |
| MAPK6    | 5597  | 4225  | 77.98118412 | 54.00725898 | 89.5147273  | 52.27216319 |
| SIGMAR1  | 10280 | 1655  | 198.8288402 | 143.7977688 | 195.0713688 | 48.68077792 |
| RPL21    | 6144  | 582   | 564.3446255 | 524.9202934 | 468.6746167 | 212.8633404 |
| IRS2     | 8660  | 7014  | 46.65273097 | 22.90595462 | 42.83531945 | 10.62073304 |
| FDFT1    | 2222  | 2115  | 154.7150142 | 176.2643412 | 118.9787947 | 104.8035957 |
| IMPDH2   | 3615  | 1712  | 191.0151103 | 185.4769718 | 183.3931982 | 37.00948254 |
| ACIN1    | 22985 | 4951  | 65.96830873 | 76.46793201 | 71.05415626 | 66.11340566 |
| RIF1     | 55183 | 9950  | 32.8044935  | 25.10506931 | 30.32307932 | 26.48868136 |
| WNK1     | 65125 | 11232 | 29.06024843 | 35.01599791 | 24.45425479 | 45.93938494 |
| NOP56    | 10528 | 2169  | 150.2035739 | 110.1321522 | 151.9613775 | 39.85114084 |
| PIEZO1   | 9780  | 7833  | 41.59218076 | 30.66687529 | 37.62827041 | 10.15633131 |
| TMED10   | 10972 | 4163  | 78.0133608  | 53.52694805 | 75.26670697 | 37.24729979 |
| EIF5A    | 1984  | 1355  | 239.6823771 | 173.1681307 | 230.3081864 | 72.60548147 |
| SRP9     | 6726  | 1648  | 196.0767789 | 186.7305447 | 187.9511287 | 117.6740599 |
| UBR5     | 51366 | 10900 | 29.62661885 | 24.18450147 | 26.61412636 | 23.21431915 |
| CKAP2    | 26586 | 3736  | 86.43740511 | 61.25513041 | 63.6229541  | 32.72672196 |
| ARHGAP35 | 2909  | 8904  | 36.22207695 | 41.49332786 | 32.01068543 | 35.3750349  |
| C12orf11 | 55726 | 2988  | 107.8704776 | 71.59283044 | 105.3595363 | 46.81336824 |
| SLTM     | 79811 | 4164  | 77.35653238 | 72.72565287 | 70.27603134 | 63.34409424 |
| RPS9     | 6203  | 753   | 426.6866616 | 567.2911775 | 418.3606629 | 428.2459212 |
| ANLN     | 54443 | 4786  | 67.1322725  | 64.76394995 | 55.2713166  | 23.51660004 |
| BCLAF1   | 9774  | 7277  | 44.12404425 | 52.02593533 | 50.66537152 | 36.19073117 |
| H2AFZ    | 3015  | 951   | 337.2049397 | 288.6749396 | 383.4674007 | 137.5068827 |
| MTHFD1   | 4522  | 3466  | 92.28631073 | 65.51255215 | 84.12376534 | 23.71209416 |
| CCAR1    | 55749 | 3858  | 82.80341645 | 82.6525588  | 85.21490116 | 64.48550352 |
| DROSHA   | 29102 | 5424  | 58.85899603 | 41.69896294 | 50.44501585 | 26.68448323 |
| IRAK1    | 3654  | 3589  | 88.72489546 | 86.73648944 | 102.1396102 | 114.2152264 |
| RBM25    | 58517 | 4303  | 73.7177162  | 71.51567224 | 75.76397555 | 50.80715129 |
| RNASE2   | 6036  | 735   | 431.296526  | 219.1946001 | 405.6092494 | 85.6535733  |
| MYO1F    | 4542  | 4173  | 75.91626179 | 316.4405679 | 83.89620167 | 460.643298  |
| PAK2     | 5062  | 6139  | 51.53767521 | 43.55745589 | 55.06688682 | 40.98698105 |
| SRSF2    | 6427  | 3003  | 105.2217835 | 115.6088321 | 125.72956   | 60.26353762 |
| LBR      | 3930  | 3837  | 82.08472373 | 177.0698086 | 98.51145115 | 128.1469138 |
| ABCB10   | 23456 | 3861  | 81.3627403  | 21.06550892 | 60.8517624  | 8.965380877 |
| PRDX1    | 5052  | 1263  | 248.7264769 | 103.3887199 | 243.905924  | 56.09667619 |
| SND1     | 27044 | 3522  | 89.19407731 | 83.3882676  | 86.1456324  | 37.81890739 |
| RAD21    | 5885  | 3773  | 83.15207208 | 67.56442919 | 75.99083519 | 48.17946433 |
| NCOR1    | 9611  | 9809  | 31.94250134 | 40.48199044 | 34.76537923 | 51.34499042 |
| NASP     | 4678  | 3301  | 94.91790234 | 61.36168144 | 104.8423021 | 39.36968495 |
| MYBL2    | 4605  | 2731  | 114.5789906 | 82.98090091 | 129.6643208 | 28.90782005 |
| TUFM     | 7284  | 2089  | 149.694034  | 121.0699364 | 138.3616819 | 49.80777193 |
| BUB3     | 9184  | 2782  | 112.3315783 | 112.8581067 | 108.0726871 | 91.82790261 |
| DDOST    | 1650  | 2144  | 145.7586058 | 178.141428  | 147.3277604 | 128.972867  |
| NUMA1    | 4926  | 7182  | 43.51245488 | 59.91226876 | 41.00960141 | 52.79159848 |
| DCAF7    | 10238 | 6369  | 49.03470949 | 66.68536617 | 45.28241471 | 37.56805087 |
| SRSF3    | 6428  | 3600  | 86.63702568 | 81.64341977 | 93.25874606 | 47.45832232 |
| PRMT1    | 3276  | 1592  | 195.9128721 | 121.0742916 | 160.587036  | 46.02967864 |
| EIF5     | 1983  | 5809  | 53.62102257 | 78.10076539 | 63.76005968 | 78.30223017 |
| MLL      | 4297  | 16608 | 18.74278263 | 14.8259945  | 15.18990878 | 11.34761991 |
| PPA1     | 5464  | 1316  | 234.9819698 | 193.5393303 | 219.3122979 | 107.5211058 |
| MCM2     | 4171  | 3453  | 89.49663657 | 93.44388286 | 81.74817294 | 32.30185447 |
| MLLT6    | 4302  | 7500  | 41.1497485  | 36.69311542 | 40.45398898 | 37.35487284 |
| PRDX3    | 10935 | 1591  | 193.3382671 | 147.0611684 | 194.5519644 | 97.20656901 |
| AP2B1    | 163   | 5772  | 53.22113835 | 36.52108797 | 49.67314989 | 31.66896453 |
| CAP1     | 10487 | 2798  | 109.5708549 | 172.5798527 | 134.5637758 | 231.5126381 |
| EIF4G3   | 8672  | 6515  | 46.99470142 | 42.37754358 | 39.37063704 | 43.00253973 |
| MACF1    | 23499 | 19349 | 15.81301843 | 16.72195246 | 16.46686755 | 15.49419329 |
| GNL3     | 26354 | 2159  | 141.7165788 | 79.05967416 | 136.8115314 | 24.56524414 |
| CALM1    | 801   | 4268  | 71.64051251 | 49.70401028 | 80.04860804 | 52.93125845 |

|          |        |       |             |             |             |             |
|----------|--------|-------|-------------|-------------|-------------|-------------|
| DHCR24   | 1718   | 4286  | 71.33964242 | 79.59795622 | 64.67699648 | 52.14219895 |
| PRKCSH   | 5589   | 2262  | 134.811743  | 177.4189501 | 130.3016101 | 85.91145377 |
| EZR      | 7430   | 3172  | 96.13624298 | 54.86517238 | 85.99263144 | 37.07792225 |
| AHCY     | 191    | 2375  | 128.3114849 | 90.91573537 | 117.1629603 | 23.86529753 |
| FAU      | 2197   | 579   | 526.3208576 | 518.4034997 | 524.0154012 | 343.6745635 |
| GSTP1    | 2950   | 986   | 308.4448459 | 475.0449324 | 237.8560701 | 244.3106967 |
| UGGT1    | 56886  | 10955 | 27.72413014 | 31.77221849 | 29.45064633 | 19.27277992 |
| LASP1    | 3927   | 4109  | 73.91527031 | 80.20675121 | 92.86451181 | 106.165539  |
| PNN      | 5411   | 3606  | 84.2256921  | 87.62527647 | 96.79490454 | 47.82845015 |
| ALDH18A1 | 5832   | 3470  | 87.23225212 | 56.5750995  | 77.45078284 | 21.40962326 |
| EIF3M    | 10480  | 1259  | 240.4256671 | 222.6556929 | 251.8970824 | 111.2635212 |
| NIN      | 51199  | 10293 | 29.38808207 | 27.53746964 | 28.81995579 | 24.11131701 |
| RFC1     | 5981   | 4899  | 61.7038462  | 38.84448107 | 56.92914574 | 25.04019003 |
| IGF2R    | 3482   | 9093  | 33.19898496 | 25.55971519 | 34.11041787 | 61.82172577 |
| FKBP1A   | 2280   | 1643  | 183.4872781 | 220.7983023 | 166.2758347 | 186.4119718 |
| CORO1C   | 23603  | 3828  | 78.43345895 | 42.43600501 | 79.3697719  | 55.36651502 |
| RBM39    | 9584   | 2809  | 106.6678969 | 106.9343037 | 111.0204015 | 104.9978118 |
| PPP6R3   | 55291  | 5145  | 58.197422   | 52.31912209 | 59.9564143  | 51.06951683 |
| TOMM20   | 9804   | 3407  | 87.82546229 | 69.328631   | 90.41772294 | 26.49934631 |
| ACTN4    | 81     | 3966  | 75.34356472 | 80.40180834 | 67.76455281 | 85.90211204 |
| HERC2    | 8924   | 15334 | 19.48692955 | 15.9705961  | 18.89079222 | 10.00659176 |
| CAD      | 790    | 7108  | 42.01015637 | 20.69071074 | 37.54257929 | 4.528163929 |
| IL17RA   | 23765  | 8606  | 34.62642726 | 7.974955485 | 39.5759976  | 9.102947939 |
| PICALM   | 8301   | 4169  | 71.47877981 | 106.4187756 | 78.14850132 | 195.7767271 |
| RNF10    | 9921   | 3864  | 76.80349793 | 73.98921701 | 78.9583839  | 76.32993098 |
| SMG1     | 23049  | 16065 | 18.44755329 | 13.49618439 | 16.61080944 | 16.70841409 |
| CNBP     | 7555   | 3399  | 86.94980847 | 68.7051055  | 78.94429154 | 45.61944955 |
| SRRT     | 51593  | 3032  | 97.33958663 | 111.1223679 | 109.9628474 | 104.9532231 |
| CALU     | 813    | 6181  | 47.74852397 | 32.01349685 | 57.52989053 | 21.45136794 |
| ACSL4    | 2182   | 5351  | 54.92567925 | 81.62064326 | 49.00100707 | 131.5730864 |
| RAP1B    | 5908   | 2126  | 138.1481296 | 139.6110706 | 175.2093294 | 197.6680713 |
| PNRC2    | 55629  | 2428  | 120.7124238 | 128.2113923 | 127.5714416 | 143.067516  |
| PCBP1    | 5093   | 1772  | 164.9391762 | 171.2743322 | 154.4095745 | 135.5999212 |
| UBE3A    | 7337   | 5276  | 55.35781542 | 35.47753131 | 49.97789655 | 25.36115967 |
| MAP4     | 4134   | 6337  | 46.05703771 | 18.21482258 | 33.77488768 | 8.656812665 |
| FAM120A  | 23196  | 4957  | 58.87904942 | 68.32876353 | 56.90239185 | 44.75731971 |
| ZFP106   | 64397  | 10487 | 27.83097625 | 38.03475786 | 26.89664884 | 37.58262574 |
| RPS19    | 6223   | 872   | 334.4714011 | 460.7423516 | 338.0071584 | 360.9826627 |
| RAD23B   | 5887   | 4130  | 70.57013938 | 57.35378786 | 71.92890423 | 48.62213851 |
| KARS     | 3735   | 2197  | 132.5672688 | 105.6857795 | 119.1542191 | 70.11759887 |
| PARP4    | 143    | 5485  | 53.06215192 | 72.15147641 | 50.46181174 | 105.9937456 |
| ARHGEF2  | 9181   | 4194  | 69.34704748 | 117.1013918 | 70.1259866  | 198.5192926 |
| GRB2     | 2885   | 3303  | 88.05374421 | 98.5645027  | 87.18774742 | 139.8554845 |
| MIS18BP1 | 55320  | 4792  | 60.65048643 | 68.07743123 | 58.64122133 | 55.7608721  |
| MNDA     | 4332   | 1670  | 174.0342102 | 147.5766164 | 160.2980794 | 302.3099307 |
| RPL31    | 6160   | 1129  | 257.428814  | 285.3995236 | 255.2634318 | 172.4858868 |
| ARCN1    | 372    | 4032  | 71.98123974 | 68.80622334 | 73.10075449 | 75.76020689 |
| TP53I11  | 9537   | 3648  | 79.22205088 | 21.5013994  | 53.34245209 | 20.47594584 |
| NUP153   | 9972   | 5687  | 50.78207411 | 37.06694562 | 47.07188195 | 24.45377683 |
| FAM101B  | 359845 | 3895  | 74.14573952 | 46.79772429 | 73.88186007 | 69.17402223 |
| UBQLN1   | 29979  | 4177  | 69.09103885 | 54.46784082 | 66.61767554 | 56.1683151  |
| NSUN2    | 54888  | 3389  | 84.91464285 | 65.62024768 | 94.57627117 | 48.50169275 |
| SIN3A    | 25942  | 6795  | 42.35110002 | 26.30048759 | 35.82046285 | 19.51301034 |
| SLC7A1   | 6541   | 7357  | 39.0603442  | 31.28804721 | 37.01862952 | 12.24423597 |
| SETD5    | 55209  | 6827  | 42.09271309 | 33.1295115  | 38.00464142 | 31.4006395  |
| EIF1AX   | 1964   | 4431  | 64.85374684 | 39.52753108 | 69.90373734 | 19.09620057 |
| PLK1     | 5347   | 2204  | 130.2915454 | 84.32053497 | 109.956271  | 32.32983655 |
| ELF1     | 1997   | 3760  | 76.31866488 | 54.34509891 | 75.41067812 | 147.030113  |
| MED13L   | 23389  | 9393  | 30.55021611 | 17.31798785 | 33.31339631 | 21.7665444  |
| ST13     | 6767   | 3214  | 89.28381454 | 61.2200562  | 88.28731628 | 38.29394794 |
| P4HA1    | 5033   | 2953  | 96.96749794 | 114.9252214 | 135.7288155 | 237.8007875 |
| TMSB10   | 9168   | 482   | 593.6527703 | 864.054539  | 607.9916266 | 1910.894868 |



|          |       |       |             |             |             |             |
|----------|-------|-------|-------------|-------------|-------------|-------------|
| STARD7   | 56910 | 3394  | 84.06690943 | 66.37709024 | 87.34016505 | 41.15377591 |
| AP2M1    | 1173  | 1958  | 145.721701  | 116.4238184 | 132.4036783 | 87.98108395 |
| RTN4     | 57142 | 4871  | 58.57587571 | 44.23715996 | 57.99378484 | 44.34235204 |
| PSAP     | 5660  | 2848  | 100.0401398 | 240.358851  | 120.7023549 | 720.5842039 |
| CACYBP   | 27101 | 3060  | 93.04246147 | 54.68867524 | 96.11385223 | 28.44588597 |
| VPS13C   | 54832 | 14607 | 19.43536574 | 24.53035922 | 15.88215705 | 23.96108058 |
| INTS1    | 26173 | 7000  | 40.55605534 | 33.29756975 | 35.37510576 | 22.64311424 |
| PSMD2    | 5708  | 2990  | 94.87893018 | 68.71295496 | 93.27621572 | 47.52677652 |
| BUB1     | 699   | 3509  | 80.84582538 | 54.73974758 | 63.94540227 | 30.0556961  |
| MTRNR2L9 | 1E+08 | 527   | 537.9195732 | 749.6818786 | 482.7075003 | 564.265654  |
| EIF4A2   | 1974  | 1905  | 148.27385   | 139.3142927 | 134.8673332 | 113.06263   |
| DOCK2    | 1794  | 6117  | 46.07626708 | 51.03622549 | 45.11000463 | 40.30707129 |
| TAX1BP1  | 8887  | 3506  | 80.3903382  | 73.40894206 | 85.75533811 | 86.3758069  |
| OLA1     | 29789 | 4356  | 64.56275648 | 46.34674297 | 61.16393115 | 18.077325   |
| SYK      | 6850  | 5079  | 55.33195138 | 62.43176027 | 65.14509476 | 39.25820634 |
| MAR6     | 10299 | 4611  | 60.81496911 | 50.59766231 | 58.46873899 | 50.79379623 |
| MCL1     | 4170  | 4107  | 68.22825332 | 125.1704416 | 80.87159602 | 264.7298327 |
| EIF2AK1  | 27102 | 4465  | 62.71199333 | 58.69008673 | 62.93588636 | 35.54406015 |
| ITPR2    | 3709  | 12568 | 22.24699856 | 81.00911335 | 23.36774493 | 73.49482031 |
| WAPAL    | 23063 | 6302  | 44.23718394 | 41.79438803 | 43.31639347 | 41.37232236 |
| RNPS1    | 10921 | 2258  | 123.2834193 | 100.8569547 | 119.3974116 | 60.78244866 |
| C12orf35 | 55196 | 6246  | 44.56835749 | 21.90510221 | 57.54008631 | 40.54410944 |
| EIF1     | 10209 | 1326  | 209.7809764 | 223.8409774 | 204.273804  | 216.3210398 |
| PTPRC    | 5788  | 5330  | 51.9593354  | 96.11488597 | 74.00912748 | 219.2156467 |
| IMMT     | 10989 | 3018  | 91.76383622 | 84.46673007 | 91.50072336 | 39.97601137 |
| RPL39    | 6170  | 401   | 690.1218741 | 814.6451766 | 687.0706454 | 584.5701329 |
| EFTUD2   | 9343  | 4167  | 66.31391869 | 59.46482972 | 68.34937805 | 36.33712251 |
| WDFY4    | 57705 | 10033 | 27.54212092 | 26.94070035 | 22.21722548 | 18.17885035 |
| SRCAP    | 10847 | 10491 | 26.33972922 | 28.75945621 | 24.00642794 | 26.35762337 |
| BUB1B    | 701   | 3749  | 73.70768183 | 45.17280352 | 57.25935384 | 11.98698522 |
| UBAP2    | 55833 | 4299  | 64.04004847 | 47.0649169  | 62.02404486 | 30.41847999 |
| EP400    | 57634 | 12317 | 22.31869741 | 21.61931138 | 18.93792129 | 17.05944303 |
| DNM1L    | 10059 | 4612  | 59.56093015 | 60.87796678 | 62.16683026 | 36.38628087 |
| PPIB     | 5479  | 1045  | 262.8660381 | 235.4136689 | 278.4106377 | 161.5556667 |
| METAP2   | 10988 | 3506  | 78.23338206 | 57.83734829 | 74.54627775 | 29.67724916 |
| PGD      | 5226  | 1937  | 141.0760489 | 878.7913674 | 146.0559089 | 819.6435582 |
| KRAS     | 3845  | 5436  | 50.26937209 | 46.5669481  | 51.77176272 | 49.49005866 |
| MTSS1L   | 92154 | 4977  | 54.86436016 | 7.835185821 | 54.59357105 | 1.342204637 |
| CCNA2    | 890   | 2811  | 96.99436079 | 60.80137645 | 97.63746176 | 24.55647181 |
| MDN1     | 23195 | 17400 | 15.5873819  | 9.668889482 | 12.65280008 | 4.70007245  |
| PLEC     | 5339  | 15249 | 17.78611352 | 6.736564212 | 18.51114441 | 3.424922726 |
| USP22    | 23326 | 5220  | 51.91878522 | 45.97524932 | 47.72121334 | 30.79090368 |
| PRC1     | 9055  | 3128  | 86.64196254 | 75.08492638 | 62.61540083 | 30.80439219 |
| ATP8B4   | 79895 | 5679  | 47.65051708 | 40.25820295 | 40.5529829  | 49.11903031 |
| ABCE1    | 6059  | 4194  | 64.4250153  | 42.98322412 | 69.62220796 | 12.98363475 |
| CEP57    | 9702  | 3158  | 85.56001081 | 69.22066616 | 73.52816743 | 49.74186119 |
| NRD1     | 4898  | 4040  | 66.8302297  | 65.02963745 | 65.94804061 | 55.567725   |
| G3BP1    | 10146 | 2855  | 94.4972826  | 66.49858053 | 95.17064908 | 33.96267088 |
| TXNRD1   | 7296  | 3923  | 68.71918319 | 64.4130167  | 68.2918882  | 89.784915   |
| APEX1    | 328   | 1574  | 171.0143477 | 175.6895564 | 188.1964647 | 51.18595137 |
| ITM2C    | 81618 | 2123  | 126.6943934 | 64.55115455 | 129.4778495 | 36.61454704 |
| DIS3     | 22894 | 7667  | 35.08180477 | 27.72693117 | 35.93521962 | 21.01648297 |
| BPTF     | 2186  | 10914 | 24.64469463 | 20.39672458 | 22.95984304 | 15.7283925  |
| DKC1     | 1736  | 2594  | 103.6113381 | 76.53967699 | 105.3165753 | 31.05886178 |
| PHB2     | 11331 | 1457  | 184.4665827 | 185.9742928 | 191.5629168 | 75.99765823 |
| NCOR2    | 9612  | 8857  | 30.32216606 | 30.49262887 | 30.29599717 | 32.18017828 |
| NKTR     | 4820  | 7312  | 36.72913359 | 34.61951995 | 33.89456032 | 23.5594861  |
| NUP98    | 4928  | 6980  | 38.3882903  | 33.2972049  | 37.14131837 | 27.60920882 |
| CELF2    | 10659 | 9256  | 28.90465579 | 30.04485637 | 34.49127857 | 20.18602426 |
| ARPP19   | 10776 | 5162  | 51.82903796 | 39.9303048  | 51.40907793 | 23.96048727 |
| RPSA     | 3921  | 1155  | 231.6376571 | 259.1032862 | 213.6628582 | 100.6010107 |
| POLE     | 5426  | 7859  | 33.99067587 | 30.53706597 | 32.82589307 | 12.49242888 |

|          |        |       |             |             |             |             |
|----------|--------|-------|-------------|-------------|-------------|-------------|
| TOPBP1   | 11073  | 5378  | 49.67138744 | 51.66834471 | 48.67642606 | 27.36440747 |
| SSR1     | 6745   | 9874  | 26.99205622 | 23.62829866 | 25.91308953 | 12.75174729 |
| TCOF1    | 6949   | 5113  | 52.12586801 | 33.77573453 | 46.90166324 | 15.91558829 |
| CHCHD2   | 51142  | 831   | 320.7214959 | 349.6676545 | 318.8340442 | 204.86483   |
| CDK1     | 983    | 1923  | 138.4894316 | 98.03247597 | 123.8262746 | 46.94917986 |
| LRR58    | 116064 | 7683  | 34.66291513 | 25.08789175 | 39.40792178 | 13.17381641 |
| NUPL1    | 9818   | 4335  | 61.33942437 | 29.04278359 | 55.36781751 | 29.04515635 |
| QKI      | 9444   | 16378 | 16.21062598 | 13.17023073 | 13.64875305 | 19.15769554 |
| SEC61A1  | 29927  | 3656  | 72.56379817 | 76.00447425 | 78.71166438 | 77.6272609  |
| SNRPB    | 6628   | 1153  | 229.7350163 | 193.8431768 | 247.567834  | 138.1713054 |
| TOP1     | 7150   | 3734  | 70.93853074 | 73.87971712 | 80.91516035 | 90.91408762 |
| CCNI     | 10983  | 1890  | 140.0423744 | 140.7736643 | 149.1290326 | 119.3152134 |
| TBC1D1   | 23216  | 5688  | 46.49713457 | 89.63452579 | 59.9160197  | 70.82163103 |
| LAMP2    | 3920   | 6603  | 40.02291614 | 67.59561829 | 43.16570393 | 72.77996678 |
| USP34    | 9736   | 11326 | 23.29706365 | 23.64867447 | 22.96411277 | 18.06953739 |
| STK17B   | 9262   | 5324  | 49.56095848 | 14.31419575 | 64.5680516  | 22.16679698 |
| AKAP9    | 10142  | 12463 | 21.15527215 | 27.80268192 | 21.03862544 | 31.12041253 |
| SYMPK    | 8189   | 4188  | 62.90682202 | 61.50778022 | 60.08599589 | 48.04543691 |
| BRD4     | 23476  | 5198  | 50.4870796  | 51.2712372  | 49.5490812  | 53.50851437 |
| CUL4A    | 8451   | 3797  | 68.90026207 | 50.99857863 | 63.26857352 | 26.54979556 |
| RBBP7    | 5931   | 2021  | 129.0434193 | 97.79940196 | 120.1218163 | 53.18640585 |
| PABPC4   | 8761   | 3230  | 80.74202799 | 76.50818804 | 85.69134284 | 24.94324689 |
| TYK2     | 7297   | 4262  | 61.04729984 | 105.6128633 | 72.62603834 | 115.985754  |
| SETX     | 23064  | 11016 | 23.61869934 | 27.87431369 | 24.45425479 | 55.89947359 |
| ELAVL1   | 1994   | 6075  | 42.76128717 | 33.37905236 | 40.23974797 | 17.66046047 |
| NAA15    | 80155  | 5554  | 46.77256384 | 29.6896267  | 43.86232082 | 14.76119724 |
| KNTC1    | 9735   | 6965  | 37.29717438 | 34.26472439 | 32.85303612 | 17.46730031 |
| UBE2N    | 7334   | 2568  | 100.91965   | 77.92202138 | 98.15526492 | 51.71079988 |
| FAM46A   | 55603  | 5617  | 46.13880382 | 35.42631075 | 87.45541573 | 65.22988107 |
| RPS28    | 6234   | 401   | 645.7787404 | 623.4869633 | 662.3065961 | 453.8243087 |
| ACACA    | 31     | 10692 | 24.21972268 | 48.26791039 | 18.97057341 | 14.50247933 |
| ARID1A   | 8289   | 8585  | 30.16392253 | 36.36442531 | 31.40353588 | 36.76023266 |
| DDX6     | 1656   | 6246  | 41.42697546 | 49.19728983 | 41.37067934 | 45.53515089 |
| HP1BP3   | 50809  | 3938  | 65.70667566 | 56.81158341 | 57.78407516 | 34.23504894 |
| PYGL     | 5836   | 2859  | 90.29021694 | 79.96723839 | 87.05612063 | 151.0251013 |
| H2AFV    | 94239  | 3755  | 68.69117019 | 59.63963999 | 65.3266599  | 26.52330242 |
| IREB2    | 3658   | 6367  | 40.4470821  | 40.59775629 | 39.98714268 | 41.10892411 |
| KDM1A    | 23028  | 3125  | 82.34309938 | 43.35432714 | 70.92406869 | 22.47770094 |
| ARHGAP11 | 9824   | 5616  | 45.81947749 | 33.68677873 | 42.06131823 | 13.7331547  |
| SF3A3    | 10946  | 2855  | 89.98718502 | 89.05502392 | 88.95421477 | 44.73996936 |
| PUM2     | 23369  | 6111  | 42.00769548 | 37.95922514 | 38.27397003 | 30.37592331 |
| SMARCA5  | 8467   | 7926  | 32.36243261 | 29.94156059 | 30.86900753 | 34.55541907 |
| ZNF207   | 7756   | 2333  | 109.8586604 | 136.966168  | 105.6876625 | 145.4225351 |
| ATP2B1   | 490    | 6950  | 36.87773449 | 17.63424124 | 29.36706179 | 54.55385041 |
| ANKRD11  | 29123  | 9326  | 27.43850337 | 30.84677204 | 25.23817544 | 30.64867623 |
| SLC16A1  | 6566   | 4390  | 58.24307431 | 24.26287547 | 57.03244697 | 9.821719319 |
| LRRFIP1  | 9208   | 4510  | 56.46677725 | 68.77673995 | 62.54216329 | 58.03559197 |
| ARF3     | 377    | 3556  | 71.50067296 | 102.7687297 | 76.35008952 | 88.97534106 |
| STK10    | 6793   | 6039  | 42.03471116 | 57.41474705 | 42.12400276 | 79.07429835 |
| G3BP2    | 9908   | 4410  | 57.56181876 | 51.43847462 | 58.06737659 | 42.55137323 |
| ASS1     | 445    | 1863  | 136.0380292 | 8.611891198 | 98.10054674 | 1.847176957 |
| USP7     | 7874   | 5412  | 46.8290555  | 41.09146699 | 44.31045901 | 28.38941371 |
| TUG1     | 55000  | 7115  | 35.56290598 | 44.37862464 | 32.01194276 | 40.91253759 |
| GART     | 2618   | 3552  | 71.23594483 | 51.81863671 | 71.49895359 | 37.78444418 |
| MSH6     | 2956   | 4435  | 56.96083511 | 38.28602159 | 53.78590656 | 18.57689904 |
| USP9X    | 8239   | 12401 | 20.35456153 | 19.98144871 | 19.45707584 | 24.97509558 |
| DDIT4    | 54541  | 1752  | 143.8402655 | 54.43629513 | 123.0082515 | 42.9814709  |
| CEP170   | 9859   | 7204  | 34.72635615 | 26.07550711 | 29.85673058 | 28.63339969 |
| SNRNP70  | 6625   | 1940  | 128.8475688 | 110.6123069 | 137.0083659 | 68.55451699 |
| DAZAP2   | 9802   | 2182  | 114.1827401 | 163.6012653 | 125.3958597 | 177.5659229 |
| MTHFD2   | 10797  | 2306  | 107.9541859 | 67.44892192 | 113.33879   | 60.65843205 |
| TRA2B    | 6434   | 4290  | 57.98087797 | 63.73326438 | 70.52675484 | 38.92862749 |

|          |        |       |             |             |             |             |
|----------|--------|-------|-------------|-------------|-------------|-------------|
| NCKAP1L  | 3071   | 3909  | 63.63212241 | 124.327983  | 74.04966054 | 143.2900138 |
| ESYT1    | 23344  | 4285  | 58.04853361 | 19.86513082 | 74.94815339 | 13.60548717 |
| SLBP     | 7884   | 1743  | 142.589547  | 110.0739768 | 171.282483  | 59.34661444 |
| SEC24C   | 9632   | 4563  | 54.37756038 | 48.83468874 | 48.06346314 | 43.29839365 |
| DDX46    | 9879   | 5695  | 43.49710898 | 34.43244295 | 50.19636209 | 16.27961707 |
| FANCI    | 55215  | 4749  | 52.16172577 | 55.64951866 | 46.00304132 | 28.34600839 |
| LONP1    | 9361   | 3111  | 79.56015735 | 55.72607802 | 82.04178455 | 36.04808424 |
| CELF1    | 10658  | 7682  | 32.19308296 | 27.87584093 | 27.42136255 | 27.53686043 |
| PNISR    | 25957  | 3222  | 76.7558235  | 85.68891881 | 71.21516165 | 65.52864806 |
| SPEN     | 23013  | 12227 | 20.20960801 | 17.73257563 | 21.51382415 | 18.37703753 |
| TAOK1    | 57551  | 12096 | 20.4284786  | 20.74318808 | 16.8734358  | 21.05286951 |
| CTSG     | 1511   | 924   | 266.9849619 | 35.93297622 | 31.32685315 | 0.438157712 |
| LAMC1    | 3915   | 7889  | 31.2188278  | 15.78951334 | 26.43402959 | 11.11062209 |
| SKP1     | 6500   | 2714  | 90.67094559 | 69.54284598 | 86.4134433  | 47.51185914 |
| EWSR1    | 2130   | 2694  | 91.11647655 | 84.53415138 | 87.99610328 | 71.53388179 |
| PRR11    | 55771  | 6487  | 37.7139268  | 36.92695176 | 31.6259447  | 11.04668067 |
| SRSF10   | 10772  | 3056  | 80.05570784 | 75.54144679 | 79.02437246 | 45.17555122 |
| CD4      | 920    | 3134  | 78.06325563 | 209.6788728 | 89.52972658 | 165.5472801 |
| SRP14    | 6727   | 1126  | 217.0922353 | 217.4894498 | 221.0421393 | 163.9565924 |
| RBBP6    | 5930   | 6853  | 35.66990471 | 32.32098185 | 32.40336848 | 33.52644965 |
| SMARCC2  | 6601   | 5588  | 43.70820881 | 54.43210714 | 41.44024668 | 47.4918109  |
| KIF5B    | 3799   | 5905  | 41.25796991 | 42.03820674 | 36.21002176 | 35.89212862 |
| WIPF1    | 7456   | 4664  | 52.14827186 | 101.5742469 | 55.67516546 | 165.9708345 |
| TRRAP    | 8295   | 12596 | 19.29304174 | 17.56691457 | 19.3906942  | 13.66025195 |
| MYO1G    | 64005  | 3313  | 73.29030113 | 95.24029025 | 74.67988396 | 85.66413096 |
| U2AF2    | 11338  | 3148  | 77.13175592 | 72.90904234 | 78.19146982 | 39.80415063 |
| NOP14    | 8602   | 2939  | 82.61679743 | 66.19017822 | 87.13070118 | 23.55585952 |
| RNF213   | 57674  | 18702 | 12.98314446 | 19.30215748 | 11.17317019 | 142.0855355 |
| LDLR     | 3949   | 5292  | 45.84398743 | 45.64448796 | 35.05442564 | 72.60203739 |
| CD164    | 8763   | 3128  | 77.49424402 | 90.82853998 | 83.35210854 | 195.6984916 |
| LAP3     | 51056  | 2100  | 115.4295216 | 91.46751155 | 101.3160737 | 508.0000513 |
| STT3A    | 3703   | 2803  | 86.47948459 | 78.62344817 | 83.51891387 | 41.30906515 |
| PSMB2    | 5690   | 4759  | 50.89254237 | 51.50576869 | 54.16419602 | 38.92044749 |
| COPA     | 1314   | 5666  | 42.70971108 | 40.1932587  | 44.26315068 | 48.23137398 |
| CEP350   | 9857   | 13473 | 17.96134662 | 16.45650719 | 17.92462571 | 16.81272899 |
| POLR2B   | 5431   | 3748  | 64.51142924 | 63.08043717 | 77.28692845 | 38.45500278 |
| SPAG5    | 10615  | 3824  | 63.12240179 | 51.80393743 | 52.93169492 | 21.54512218 |
| RAB10    | 10890  | 3785  | 63.77280435 | 54.98698218 | 59.1708975  | 65.56876776 |
| TARDBP   | 23435  | 4236  | 56.88651844 | 46.0815467  | 51.92337974 | 27.38237452 |
| EIF2AK4  | 440275 | 5532  | 43.52257881 | 31.94257393 | 37.77307104 | 16.24700202 |
| DGKZ     | 8525   | 4094  | 58.70985189 | 52.95950226 | 57.74979188 | 36.83671297 |
| LOC22090 | 220906 | 5376  | 44.55740122 | 31.66744255 | 46.45435043 | 17.0573428  |
| PHIP     | 55023  | 11966 | 20.01843464 | 20.14916972 | 19.17560177 | 20.2834871  |
| RANBP2   | 5903   | 11711 | 20.41941906 | 18.93250118 | 22.94886999 | 16.81865628 |
| PRG2     | 5553   | 874   | 273.372346  | 186.6287474 | 1087.850602 | 518.3475919 |
| PLCG2    | 5336   | 4263  | 55.95089329 | 63.98010934 | 51.9414567  | 83.14636149 |
| MIF      | 4282   | 561   | 424.8026238 | 326.1062998 | 445.5434451 | 191.9646258 |
| UBE3C    | 9690   | 5195  | 45.83443422 | 41.77844753 | 44.33116263 | 31.17287591 |
| RAB8A    | 4218   | 2194  | 108.4345942 | 83.58764792 | 101.212527  | 104.9050215 |
| AZIN1    | 51582  | 4348  | 54.71607627 | 59.60313072 | 54.71633884 | 60.29102519 |
| WDR43    | 23160  | 3501  | 67.89520521 | 43.47178625 | 63.48802312 | 20.00582307 |
| AEBP2    | 121536 | 5660  | 41.99666315 | 28.62179537 | 33.26055166 | 24.57042913 |
| CASC5    | 57082  | 7685  | 30.90393328 | 23.66056874 | 27.24569922 | 12.48552779 |
| PRR13    | 54458  | 1262  | 188.0287964 | 308.6462226 | 201.9092094 | 380.797243  |
| EIF3J    | 8669   | 2558  | 92.68489247 | 70.47366769 | 96.14365216 | 45.42383399 |
| ATF4     | 468    | 2022  | 117.2541815 | 128.7183856 | 142.6328879 | 122.438427  |
| MRPS35   | 60488  | 1919  | 123.441151  | 129.2406348 | 133.3329057 | 73.41870173 |
| UQCRC2   | 7385   | 1674  | 141.2633193 | 119.4031769 | 122.6814743 | 80.53621429 |
| CAND1    | 55832  | 5956  | 39.703626   | 37.22607813 | 35.11952884 | 24.33496741 |
| PDCD11   | 22984  | 6416  | 36.82518863 | 19.93546774 | 34.87384075 | 8.203164646 |
| SAT1     | 6303   | 1199  | 196.8857582 | 297.915591  | 203.3549747 | 1363.482483 |
| NAPA     | 8775   | 1846  | 127.879753  | 123.0046077 | 132.5394115 | 413.9593487 |

|          |       |       |             |             |             |             |
|----------|-------|-------|-------------|-------------|-------------|-------------|
| CCNB1    | 891   | 2101  | 112.2616078 | 78.37855974 | 91.31202442 | 28.51924961 |
| CHD8     | 57680 | 8254  | 28.57543469 | 33.01724902 | 29.46314034 | 47.62743541 |
| NCAPG2   | 54892 | 3950  | 59.71180707 | 37.28921636 | 54.77356851 | 18.03923032 |
| LRPAP1   | 4043  | 1586  | 148.1993022 | 388.76295   | 141.2117573 | 384.6914205 |
| RAB27A   | 5873  | 3474  | 67.59922484 | 38.74235509 | 52.72996203 | 26.74578241 |
| XPO6     | 23214 | 4422  | 53.10712508 | 37.84426645 | 45.20022258 | 49.6229958  |
| ZC3H11A  | 9877  | 4795  | 48.9759556  | 47.16896246 | 49.65963004 | 49.68900348 |
| ETF1     | 2107  | 3713  | 63.24796851 | 50.11184804 | 69.47985285 | 47.59504373 |
| C9orf140 | 89958 | 3865  | 60.70771563 | 39.20471556 | 51.5502018  | 13.04134201 |
| TRAP1    | 10131 | 2310  | 101.4852531 | 61.25487221 | 108.8436649 | 20.50578092 |
| POLD2    | 5425  | 1789  | 130.9259634 | 91.30036776 | 120.1098951 | 19.34898578 |
| CLEC11A  | 6320  | 1423  | 164.6005261 | 184.6238477 | 96.06552396 | 39.5468896  |
| SPTBN1   | 6711  | 10238 | 22.85819129 | 19.91520869 | 28.66522109 | 19.73276082 |
| PCNP     | 57092 | 2250  | 103.9190117 | 82.59664848 | 95.4068078  | 54.88071396 |
| LMAN1    | 3998  | 4848  | 48.18758046 | 33.78342064 | 45.93525959 | 17.5789091  |
| FNDC3B   | 64778 | 7027  | 33.2451103  | 28.69838903 | 39.08783119 | 86.50830731 |
| ITGA5    | 3678  | 4267  | 54.65306251 | 37.13007707 | 51.6947014  | 56.69146736 |
| TBL1XR1  | 79718 | 6550  | 35.51014645 | 34.4285003  | 33.06364586 | 26.11486858 |
| ATP11A   | 23250 | 8795  | 26.4226348  | 28.0979474  | 23.30258312 | 36.87220449 |
| PTPLAD1  | 51495 | 3213  | 72.32713136 | 42.30561397 | 69.11306698 | 17.01082882 |
| PSME3    | 10197 | 3228  | 71.99103874 | 67.23638009 | 86.79169565 | 52.11226305 |
| CD44     | 960   | 5748  | 40.39364769 | 17.05747761 | 62.34150231 | 19.19341168 |
| MTA2     | 9219  | 3069  | 75.52098878 | 86.83867415 | 88.32790773 | 60.15481362 |
| ANP32E   | 81611 | 3470  | 66.73473441 | 66.52872086 | 66.97787824 | 43.51928869 |
| COPB2    | 9276  | 3221  | 71.76676686 | 61.22537286 | 73.99230389 | 55.05361191 |
| BAZZA    | 11176 | 8934  | 25.87427312 | 29.65615202 | 28.6395619  | 61.69843226 |
| PLEK     | 5341  | 2866  | 80.44228805 | 414.8762058 | 95.91119139 | 440.3145609 |
| MLL5     | 55904 | 6873  | 33.54395425 | 37.54404902 | 33.13909104 | 54.42871217 |
| IGFBP2   | 3485  | 1439  | 159.645624  | 54.50806465 | 76.64395096 | 24.75849887 |
| PTDSS1   | 9791  | 2504  | 91.74522879 | 118.1796347 | 102.2672247 | 64.75460033 |
| EIF3L    | 51386 | 1970  | 116.5104907 | 169.3302178 | 117.1182535 | 51.58339553 |
| USP10    | 9100  | 3399  | 67.40714751 | 53.36446172 | 66.13915448 | 40.73590534 |
| PRMT5    | 10419 | 2470  | 92.67712883 | 50.15990798 | 85.54038922 | 20.73461633 |
| BDP1     | 55814 | 11097 | 20.60990556 | 15.86355059 | 18.69709252 | 11.36461941 |
| MRPL3    | 11222 | 1781  | 128.3008062 | 74.0690339  | 124.8015547 | 19.77687937 |
| H2AFY    | 9555  | 1940  | 117.7854309 | 139.7873079 | 121.761012  | 78.46727059 |
| TXN      | 7295  | 508   | 449.8105037 | 393.4663744 | 430.8878204 | 292.485798  |
| LYAR     | 55646 | 1584  | 143.9993457 | 72.58943518 | 156.0626078 | 27.09275186 |
| SHMT2    | 6472  | 2357  | 96.68671081 | 80.73785014 | 90.44816471 | 43.19971068 |
| FARSA    | 2193  | 1853  | 122.9846613 | 76.12147299 | 127.591823  | 45.22695589 |
| TBC1D2B  | 23102 | 6087  | 37.3381664  | 30.45782712 | 33.25296556 | 21.81589192 |
| PCNA     | 5111  | 1355  | 167.7324124 | 148.6647579 | 181.3462564 | 69.46820758 |
| MAN2B1   | 4125  | 3239  | 70.04280535 | 87.2342835  | 62.75268306 | 66.9346441  |
| CPSF6    | 11052 | 6630  | 34.21849872 | 28.70273194 | 33.42951956 | 13.34259625 |
| FOXM1    | 2305  | 3641  | 62.19716402 | 55.57046903 | 49.67309962 | 23.1839703  |
| NCAPG    | 64151 | 4682  | 48.32453824 | 30.8881701  | 44.49525303 | 16.81863043 |
| EIF2S1   | 1965  | 4165  | 54.32304634 | 40.50044234 | 56.20732667 | 27.60614506 |
| PPIF     | 10105 | 2213  | 102.1469055 | 128.3830425 | 109.9864641 | 75.28194949 |
| YARS     | 8565  | 3117  | 72.52200894 | 57.04859879 | 75.91881063 | 39.09598187 |
| NUDC     | 10726 | 1397  | 161.3729015 | 99.21397989 | 179.8264719 | 48.97706205 |
| HDAC2    | 3066  | 6684  | 33.69742028 | 26.37053465 | 33.66521108 | 12.02337801 |
| BAZ1A    | 11177 | 6031  | 37.31208274 | 70.34876998 | 43.68630367 | 117.2751529 |
| UBE2R2   | 54926 | 4457  | 50.48893224 | 52.8458936  | 47.12072084 | 56.09146191 |
| RALGAPA2 | 57186 | 9453  | 23.71856832 | 26.02425515 | 24.20621988 | 21.84253044 |
| RAD50    | 10111 | 6597  | 33.89396208 | 35.39921989 | 29.8495373  | 20.40551673 |
| ZEB2     | 9839  | 9243  | 24.19111412 | 16.17664519 | 21.53307857 | 16.68839052 |
| C1orf144 | 26099 | 3651  | 61.13111353 | 54.68586292 | 58.159733   | 56.49822277 |
| CNTRL    | 11064 | 7431  | 30.03494758 | 30.61662914 | 26.44258216 | 25.74287115 |
| PSMA1    | 5682  | 1498  | 148.8553467 | 135.6631565 | 160.7908064 | 126.6193889 |
| TM9SF2   | 9375  | 2391  | 93.08930866 | 113.1404765 | 103.38903   | 107.8604648 |
| GLT25D1  | 79709 | 3593  | 61.77661522 | 45.33556709 | 69.68339611 | 31.88832074 |
| PPP1CA   | 5499  | 1521  | 145.9325302 | 158.5173997 | 195.5877344 | 148.2615078 |



|          |        |       |             |             |             |             |
|----------|--------|-------|-------------|-------------|-------------|-------------|
| TRPM7    | 54822  | 10404 | 21.31478204 | 23.36701836 | 22.84653561 | 23.64004887 |
| KRI1     | 65095  | 3023  | 73.35725846 | 69.43711182 | 66.18811413 | 31.07078809 |
| MAPRE1   | 22919  | 2640  | 83.99961831 | 88.87985494 | 86.27461089 | 72.15362123 |
| MST4     | 51765  | 3352  | 66.09624289 | 57.63601959 | 60.00688926 | 28.02117912 |
| SUGP2    | 10147  | 4768  | 46.46698955 | 43.46358993 | 41.25547668 | 26.61973512 |
| LIG1     | 3978   | 3083  | 71.59813866 | 67.79664557 | 67.23008462 | 20.6171466  |
| EID1     | 23741  | 2096  | 105.3134835 | 101.4228918 | 95.56200084 | 70.40584022 |
| WSB1     | 26118  | 2849  | 77.47878606 | 160.9651334 | 71.41706746 | 249.0393698 |
| TNPO3    | 23534  | 4583  | 48.11971969 | 43.7107972  | 49.88219764 | 39.31086363 |
| VPS35    | 55737  | 3298  | 66.8066371  | 50.13397577 | 63.29573809 | 34.98618917 |
| WBP11    | 51729  | 2690  | 81.75446722 | 59.72578651 | 72.7322264  | 44.24839086 |
| RUVBL2   | 10856  | 1488  | 147.6580179 | 91.0499142  | 126.0892931 | 27.88838502 |
| ATP5F1   | 515    | 2116  | 103.6419463 | 111.3110339 | 109.3368685 | 41.32763176 |
| DNAJC8   | 22826  | 1765  | 124.2528942 | 91.02683609 | 121.2642851 | 65.60300828 |
| CARD8    | 22900  | 5512  | 39.78707517 | 50.1292687  | 39.21340908 | 83.76999935 |
| GMPS     | 8833   | 2457  | 89.17459184 | 58.49698073 | 78.59758725 | 24.71658888 |
| PPIG     | 9360   | 2717  | 80.49068819 | 70.53224471 | 82.89641355 | 57.14499002 |
| KPNA3    | 3839   | 4478  | 48.74596415 | 30.70294026 | 38.87866087 | 15.05332992 |
| HECTD1   | 25831  | 9134  | 23.89801045 | 28.10414417 | 24.38079029 | 16.64375696 |
| UBA2     | 10054  | 2682  | 81.31246879 | 54.33727659 | 79.01514379 | 34.11552798 |
| NMT1     | 4836   | 4903  | 44.4788989  | 38.31286013 | 42.53274719 | 34.68085761 |
| SOD1     | 6647   | 981   | 221.8871243 | 129.4746486 | 206.9772229 | 66.03184113 |
| SLC16A3  | 9123   | 2102  | 103.3598937 | 199.5105198 | 116.7996635 | 269.0705248 |
| PDCD6IP  | 10015  | 5972  | 36.34596625 | 54.70072268 | 33.71640616 | 81.52066567 |
| RSL24D1  | 51187  | 1487  | 145.9704845 | 110.4422923 | 138.6778259 | 83.31302228 |
| MED1     | 5469   | 8148  | 26.58926585 | 22.5895677  | 25.80121963 | 17.49017176 |
| RLIM     | 51132  | 10652 | 20.33884136 | 19.60141059 | 19.45835063 | 19.68797428 |
| YEATS2   | 55689  | 6524  | 33.1767247  | 26.50493001 | 29.14719271 | 48.28009055 |
| SH3BGRL3 | 83442  | 1131  | 191.374847  | 288.2442244 | 226.6033736 | 485.578696  |
| ERO1L    | 30001  | 3334  | 64.8591979  | 48.92427271 | 68.88618344 | 73.77056643 |
| STOML2   | 30968  | 1303  | 165.9559216 | 122.788847  | 160.3688634 | 50.80141073 |
| C1orf43  | 25912  | 1909  | 113.2742618 | 119.2954446 | 114.6626573 | 99.46478442 |
| ZNF638   | 27332  | 6527  | 33.0988478  | 35.67644485 | 33.27726899 | 50.52192703 |
| NT5DC2   | 64943  | 2105  | 102.5329185 | 18.41942382 | 85.91912386 | 2.211811804 |
| XPO5     | 57510  | 5378  | 40.13235282 | 31.4484953  | 37.75467751 | 17.91672346 |
| NSD1     | 64324  | 12998 | 16.60500027 | 16.86931542 | 17.05167831 | 14.23449613 |
| QARS     | 5859   | 2437  | 88.48067595 | 107.1645082 | 87.4790005  | 43.02755478 |
| NUS1     | 116150 | 4811  | 44.7346986  | 31.58842049 | 45.454111   | 23.0157115  |
| NUP188   | 23511  | 5689  | 37.83066179 | 26.98747052 | 35.43077208 | 12.56062377 |
| SRPR     | 6734   | 3100  | 69.35943509 | 78.56649175 | 62.09045729 | 60.66335925 |
| ATP13A3  | 79572  | 7384  | 29.06358023 | 17.86524233 | 32.99178357 | 19.16275396 |
| SNX3     | 8724   | 1497  | 143.2205012 | 170.5853418 | 157.3697454 | 192.9632515 |
| TMEM106  | 79022  | 1606  | 133.3727921 | 142.4963681 | 120.3770589 | 59.11527816 |
| SEPT6    | 23157  | 4716  | 45.37580957 | 43.37582795 | 34.31809313 | 33.26598151 |
| MAVS     | 57506  | 11771 | 18.16225739 | 21.9406237  | 21.53952201 | 16.50936271 |
| SPCS3    | 60559  | 4596  | 46.47161567 | 46.05984563 | 47.94821717 | 28.3206612  |
| PSMD3    | 5709   | 2174  | 98.15048732 | 68.87928434 | 103.0183289 | 62.75853433 |
| TMEM33   | 55161  | 7717  | 27.65053252 | 21.65666886 | 30.93841912 | 22.48043742 |
| SEC63    | 11231  | 6500  | 32.82756299 | 32.77354563 | 31.85524094 | 18.99717022 |
| AKT1     | 207    | 3008  | 70.86927303 | 65.2644931  | 69.32781232 | 46.23292183 |
| FAM60A   | 58516  | 3134  | 68.02002976 | 56.45473889 | 65.9337896  | 53.73988959 |
| ADAM10   | 102    | 3927  | 54.23233692 | 57.53815695 | 59.56002822 | 86.70367901 |
| PRDX6    | 9588   | 1715  | 124.0618081 | 80.16779387 | 113.8350551 | 55.35809722 |
| RBM3     | 5935   | 1588  | 133.9836278 | 159.5470797 | 165.1161139 | 55.70617954 |
| CREBZF   | 58487  | 7575  | 28.06093924 | 26.82817274 | 27.78080823 | 16.94256094 |
| HLTF     | 6596   | 5351  | 39.72371795 | 26.23520676 | 33.48336342 | 14.03496695 |
| GNB2     | 2783   | 1681  | 126.4495031 | 169.1460474 | 123.4275049 | 183.5226574 |
| CSDA     | 8531   | 1976  | 107.2613645 | 49.95692274 | 86.71656957 | 19.66920126 |
| IARS2    | 55699  | 3549  | 59.66302341 | 42.38153345 | 59.83127224 | 24.41238471 |
| PAIP2    | 51247  | 1521  | 139.2137213 | 92.00455359 | 124.1870984 | 107.4030851 |
| PXK      | 54899  | 2048  | 103.1910634 | 58.86351682 | 94.50041084 | 39.0426762  |
| SPTAN1   | 6709   | 7907  | 26.72762081 | 23.61626278 | 28.37794569 | 21.65863388 |

|         |        |      |             |             |             |             |
|---------|--------|------|-------------|-------------|-------------|-------------|
| CTBP1   | 1487   | 2483 | 85.03057253 | 79.51258908 | 87.21984712 | 60.24765595 |
| ZRANB2  | 9406   | 3162 | 66.70668103 | 60.25361969 | 59.93751769 | 45.645724   |
| PIWIL4  | 143689 | 3214 | 65.62741923 | 83.33692815 | 60.08533662 | 74.446458   |
| OPA1    | 4976   | 6510 | 32.40038793 | 28.82106306 | 28.75549901 | 16.16943299 |
| STRN4   | 29888  | 3242 | 64.99757534 | 71.61988202 | 74.36024451 | 73.17909543 |
| RSRC2   | 65117  | 2449 | 85.9606995  | 73.7012963  | 77.90532442 | 66.37418414 |
| PHF3    | 23469  | 6947 | 30.27398401 | 23.89669643 | 28.43691548 | 28.84764277 |
| TLN1    | 7094   | 8434 | 24.93637265 | 53.47561702 | 29.8113429  | 72.43660285 |
| ADD1    | 118    | 4068 | 51.64920864 | 70.00495848 | 61.23518526 | 62.30111515 |
| HADHB   | 3032   | 2196 | 95.67804224 | 80.26441422 | 85.72619416 | 46.73562546 |
| CPSF7   | 79869  | 3764 | 55.76636413 | 54.8201557  | 61.18501325 | 34.47314058 |
| TRERF1  | 55809  | 7580 | 27.66493515 | 20.84279334 | 28.59870253 | 24.40896844 |
| ERP29   | 10961  | 1472 | 142.3205314 | 163.3399911 | 159.6118578 | 227.4574316 |
| INCENP  | 3619   | 4146 | 50.48032708 | 38.26745575 | 42.34868227 | 16.25875817 |
| ZDHHC5  | 25921  | 4582 | 45.63226755 | 57.43461385 | 49.20140558 | 68.43350256 |
| SAMD9   | 54809  | 6855 | 30.50139313 | 39.10542958 | 29.37335924 | 500.6533833 |
| LUC7L2  | 51631  | 2725 | 76.65418853 | 69.91631026 | 83.19579778 | 42.49148977 |
| EMP3    | 2014   | 850  | 245.503856  | 113.5135912 | 303.0072048 | 90.73576092 |
| ATP2B4  | 493    | 8911 | 23.41805382 | 29.03251565 | 18.23341729 | 5.452017406 |
| HIPK1   | 204851 | 8155 | 25.58899786 | 18.63542501 | 25.23499173 | 15.51416792 |
| PTPN7   | 5778   | 3772 | 55.26879412 | 111.2981914 | 68.8411908  | 112.3769987 |
| UBTF    | 7343   | 4635 | 44.97818585 | 40.48006916 | 43.8068297  | 27.07786301 |
| ERLIN1  | 10613  | 3450 | 60.36797253 | 57.87190885 | 45.68650202 | 24.46748865 |
| YLPM1   | 56252  | 8150 | 25.55454052 | 22.55668281 | 23.43575758 | 13.83470879 |
| BCOR    | 54880  | 6436 | 32.36008472 | 25.72478011 | 32.89424035 | 20.50708804 |
| ARID2   | 196528 | 8466 | 24.57655552 | 27.87382626 | 23.85875642 | 18.00483508 |
| SMCHD1  | 23347  | 8672 | 23.96918045 | 21.40447721 | 25.87458678 | 40.73320639 |
| DLD     | 1738   | 3579 | 58.07788011 | 54.97660258 | 55.25636676 | 34.04922478 |
| PKP4    | 8502   | 4604 | 45.0590705  | 25.50669523 | 34.55634781 | 6.067589724 |
| LGALS1  | 3956   | 586  | 353.3160209 | 54.37725925 | 329.1859849 | 38.34403377 |
| CYBB    | 1536   | 4353 | 47.56333293 | 405.1224137 | 99.93919679 | 815.4353577 |
| CLPTM1L | 81037  | 2164 | 95.58170151 | 69.09460788 | 96.85512166 | 57.24882816 |
| SRM     | 6723   | 1273 | 162.4813842 | 75.09443971 | 157.8411689 | 19.87714679 |
| COPS2   | 9318   | 4124 | 50.15489866 | 41.06518923 | 47.49296163 | 35.43977669 |
| ZC3HAV1 | 56829  | 7190 | 28.7391399  | 38.83301168 | 31.06091693 | 81.47832119 |
| IL2RG   | 3561   | 1560 | 132.4579589 | 116.4157936 | 158.0572542 | 272.8896787 |
| ARPC1B  | 10095  | 1551 | 133.0947967 | 292.225455  | 151.6182717 | 321.4586006 |
| SF3A1   | 10291  | 5136 | 40.1927628  | 40.39276275 | 44.92269459 | 27.78667219 |
| CCNG1   | 900    | 2484 | 83.1038767  | 90.96310078 | 67.87650546 | 36.99786787 |
| RRM1    | 6240   | 3234 | 63.83117802 | 60.01461608 | 63.82968827 | 18.77818766 |
| NFATC3  | 4775   | 6453 | 31.95810376 | 29.21376899 | 33.03677735 | 34.03615625 |
| ITGB1   | 3688   | 3879 | 53.16464129 | 50.66729259 | 53.48843404 | 75.56509244 |
| FLII    | 2314   | 4176 | 49.38353533 | 60.61732037 | 45.990864   | 42.46352585 |
| SUZ12   | 23512  | 4477 | 46.06335572 | 37.57844025 | 50.82727004 | 35.22271258 |
| SRSF6   | 6431   | 4023 | 51.21085195 | 62.14722155 | 59.66181678 | 37.33587281 |
| PIK3CD  | 5293   | 5411 | 38.03675314 | 64.98428692 | 30.84734088 | 75.08311365 |
| ATP5G2  | 517    | 1178 | 174.3702028 | 165.7057995 | 197.8328453 | 112.3841056 |
| SLK     | 9748   | 5629 | 36.45473667 | 38.4781257  | 35.05773088 | 30.67539885 |
| PPP2CA  | 5515   | 2643 | 77.56312015 | 63.82305802 | 88.4949795  | 64.87220845 |
| NOP58   | 51602  | 1979 | 103.5873302 | 91.43008591 | 113.0624367 | 40.40394182 |
| CLINT1  | 9685   | 4061 | 50.42968244 | 52.73139868 | 53.69265544 | 35.19201607 |
| ACSL3   | 2181   | 4369 | 46.87455719 | 46.20883781 | 41.00926474 | 65.56119045 |
| EIF3H   | 8667   | 1286 | 159.0906331 | 160.9732225 | 161.1744564 | 96.64955043 |
| DHFR    | 1719   | 3932 | 52.03218571 | 50.09768396 | 56.47514857 | 15.49620746 |
| BZW2    | 28969  | 1883 | 108.651383  | 76.09209575 | 104.5764193 | 36.01363202 |
| OS9     | 10956  | 2869 | 71.31075434 | 113.2415665 | 88.37285243 | 187.4001603 |
| C1QBP   | 708    | 1163 | 175.9162117 | 127.6066793 | 206.3796121 | 60.39794965 |
| SLFN11  | 91607  | 5292 | 38.62172488 | 32.88592721 | 32.85853337 | 32.93485469 |
| SP1     | 6667   | 7667 | 26.65790636 | 32.63872505 | 26.59316483 | 45.7557349  |
| PLOD1   | 5351   | 3047 | 67.07783657 | 47.09689825 | 94.65168994 | 80.25404216 |
| MCFD2   | 90411  | 4334 | 47.15878358 | 41.54333393 | 49.28677751 | 35.63756863 |
| ZNF609  | 23060  | 8618 | 23.69247875 | 16.44483494 | 20.49594575 | 18.11007813 |

|          |        |       |             |             |             |             |
|----------|--------|-------|-------------|-------------|-------------|-------------|
| RBM26    | 64062  | 3624  | 56.34155129 | 51.4654959  | 56.37758395 | 37.08961507 |
| NFE2L1   | 4779   | 4891  | 41.7046403  | 33.62308758 | 38.79241785 | 44.45074603 |
| FBL      | 2091   | 1171  | 174.1907734 | 109.227977  | 159.3206185 | 36.64809475 |
| FXR1     | 8087   | 8911  | 22.86758047 | 19.5800687  | 21.90855342 | 13.01669156 |
| ZNF770   | 54989  | 5453  | 37.36897296 | 28.52323747 | 35.72428938 | 43.21056235 |
| TMEM48   | 55706  | 4840  | 42.05963293 | 35.77293307 | 37.14944874 | 12.04535383 |
| HTT      | 3064   | 13481 | 15.08524866 | 14.94256709 | 16.44074732 | 12.19288159 |
| DCAF12   | 25853  | 3688  | 55.14214675 | 71.41763378 | 47.43594968 | 60.43226088 |
| GAK      | 2580   | 4549  | 44.57047235 | 55.10810515 | 48.72229384 | 78.05236879 |
| SEC16A   | 9919   | 9059  | 22.35861492 | 23.78620225 | 21.69056497 | 20.80376106 |
| HEATR1   | 55127  | 8497  | 23.81338194 | 15.99716814 | 21.68298363 | 5.241185107 |
| TOMM70A  | 9868   | 4376  | 46.23910109 | 34.93218047 | 43.93718758 | 18.6885879  |
| ZMIZ1    | 57178  | 7555  | 26.75551558 | 40.02434854 | 34.51031046 | 54.552636   |
| SMARCE1  | 6605   | 2425  | 83.35584338 | 72.31724655 | 80.94166734 | 42.57266809 |
| CPD      | 1362   | 9060  | 22.31102872 | 36.62228119 | 29.33733221 | 153.5867554 |
| PSMD7    | 5713   | 1686  | 119.7707794 | 113.531006  | 138.4754812 | 93.41023451 |
| GBF1     | 8729   | 6450  | 31.30752466 | 34.02948751 | 30.69361572 | 33.76952815 |
| EIF2A    | 83939  | 3894  | 51.85761018 | 44.00573564 | 47.69370961 | 21.20980382 |
| MLL3     | 58508  | 16872 | 11.95644546 | 13.20724779 | 11.44584352 | 20.63641799 |
| TIAL1    | 7073   | 3945  | 51.1353987  | 44.84896114 | 50.61193903 | 30.32584487 |
| BRIX1    | 55299  | 1303  | 154.818993  | 96.45252049 | 149.6667957 | 44.58717089 |
| RBM6     | 10180  | 3758  | 53.62553531 | 47.91080609 | 55.77288006 | 37.38308432 |
| AMD1     | 262    | 3421  | 58.90814431 | 53.672649   | 62.19343896 | 42.72249022 |
| SPTLC2   | 9517   | 8164  | 24.6845617  | 25.11098358 | 22.98148801 | 44.21002727 |
| CPNE1    | 8904   | 2207  | 91.21901927 | 80.36919667 | 85.10745485 | 61.17809315 |
| IPO9     | 55705  | 11416 | 17.63493128 | 16.78662481 | 18.43374407 | 8.972407556 |
| S100A11  | 6282   | 595   | 338.3535723 | 327.6951246 | 376.0513652 | 654.576693  |
| KIAA0947 | 23379  | 7966  | 25.24679756 | 18.74189038 | 25.62152642 | 13.59520985 |
| LARP4B   | 23185  | 5640  | 35.586386   | 40.89216821 | 34.95189403 | 45.33114431 |
| CLNS1A   | 1207   | 1378  | 145.50278   | 119.9868302 | 149.4939349 | 55.23458089 |
| KIAA0020 | 9933   | 2232  | 89.73944654 | 58.80306958 | 84.15419035 | 26.39193509 |
| RREB1    | 6239   | 8733  | 22.93581183 | 20.00467478 | 23.70995833 | 20.7690669  |
| GPX1     | 2876   | 1200  | 166.4044051 | 105.8455253 | 167.7953146 | 121.4573178 |
| PDS5B    | 23047  | 7498  | 26.55003036 | 24.28038189 | 25.16368257 | 15.41569495 |
| PHB      | 5245   | 1826  | 109.0208804 | 64.92168033 | 101.7082723 | 30.153697   |
| ZDHHC3   | 51304  | 12714 | 15.65771022 | 16.66775863 | 17.15006086 | 10.61979327 |
| BCAP31   | 10134  | 1821  | 109.2079855 | 127.6301429 | 110.1094116 | 107.4951732 |
| PRPF4B   | 8899   | 7482  | 26.49753849 | 31.18228026 | 30.66763577 | 30.84321088 |
| HDC      | 3067   | 2646  | 74.69441591 | 1.684298449 | 101.6498493 | 9.868980847 |
| ATAD2    | 29028  | 5580  | 35.41961013 | 30.31003723 | 35.66850272 | 16.68768404 |
| XRN2     | 22803  | 3449  | 57.30397927 | 54.98133219 | 60.52459966 | 45.31025868 |
| BNIP2    | 663    | 2533  | 77.94592907 | 82.16570373 | 76.65641362 | 71.84506427 |
| PSME4    | 23198  | 7101  | 27.77533476 | 22.87635927 | 27.84995587 | 14.73816676 |
| ADIPOR2  | 79602  | 3982  | 49.53105278 | 93.5651052  | 47.91314403 | 86.06531014 |
| CSNK2B   | 1460   | 1128  | 174.851642  | 175.4214752 | 174.3848518 | 141.2336127 |
| SMC2     | 10592  | 6054  | 32.54513809 | 24.69784134 | 29.87442282 | 9.696790594 |
| AP3M1    | 26985  | 5270  | 37.38676774 | 33.31919461 | 37.56619002 | 23.8535719  |
| DICER1   | 23405  | 10323 | 19.06653878 | 19.10364487 | 19.3212065  | 11.90296617 |
| SLC38A10 | 124565 | 4303  | 45.74108292 | 45.20867622 | 46.20473169 | 55.08812422 |
| MRC2     | 9902   | 5983  | 32.86302752 | 4.804515516 | 26.98003638 | 2.808222568 |
| RTF1     | 23168  | 5038  | 39.02729132 | 36.53429885 | 39.50580492 | 27.36285345 |
| GTSF1    | 121355 | 822   | 239.1964643 | 195.9951716 | 207.4292    | 160.3177491 |
| BIRC6    | 57448  | 15718 | 12.48318624 | 12.83010432 | 12.78354804 | 15.76364221 |
| SORL1    | 6653   | 10973 | 17.88122859 | 17.22064309 | 15.57726893 | 7.379162051 |
| PSMA6    | 5687   | 1035  | 189.5755762 | 161.9035545 | 164.536732  | 183.8484359 |
| PRCP     | 5547   | 2224  | 88.13234494 | 154.3998054 | 90.91704884 | 75.81980344 |
| ZNF664   | 144348 | 4341  | 45.15234627 | 29.25930207 | 47.1630808  | 18.88589945 |
| STRAP    | 11171  | 1924  | 101.8743946 | 66.13173752 | 104.9834885 | 30.19598943 |
| PROSER1  | 80209  | 5228  | 37.49164789 | 44.19997974 | 35.92810881 | 31.63434985 |
| PRELID1  | 27166  | 1287  | 152.1382665 | 107.0012426 | 135.2747812 | 78.48640452 |
| SORD     | 6652   | 2898  | 67.49398303 | 38.36905096 | 65.8351068  | 14.10994835 |
| LARP4    | 113251 | 6537  | 29.92160973 | 22.63437397 | 30.57601105 | 22.29597389 |

|          |        |       |             |             |             |             |
|----------|--------|-------|-------------|-------------|-------------|-------------|
| RFWD3    | 55159  | 4952  | 39.45742663 | 29.2490398  | 36.7785671  | 16.51479415 |
| PUM1     | 9698   | 5416  | 36.03928923 | 30.77526739 | 32.96447994 | 39.05800624 |
| CCDC6    | 8030   | 5842  | 33.37631022 | 37.41849773 | 29.0417089  | 42.48164772 |
| RSF1     | 51773  | 5138  | 37.94947534 | 33.30780496 | 34.13124794 | 47.67203662 |
| COPB1    | 1315   | 3490  | 55.81089345 | 56.12318908 | 54.66766175 | 58.69857    |
| MLC1     | 23209  | 3960  | 49.18687327 | 18.288036   | 44.23107757 | 3.118222384 |
| DARS     | 1615   | 2322  | 83.79656847 | 62.37779719 | 87.89882837 | 52.3943784  |
| DDX24    | 57062  | 2967  | 65.57992315 | 45.21242879 | 68.93281058 | 45.3708102  |
| MAPK1IP1 | 93487  | 6469  | 30.01497289 | 23.18231517 | 30.14621035 | 22.90584753 |
| MRPL37   | 51253  | 1487  | 130.5762338 | 88.26392153 | 111.1127662 | 34.57762689 |
| SCARB1   | 949    | 2759  | 70.30173015 | 40.22133998 | 87.68432467 | 20.25022333 |
| UBE2S    | 27338  | 1207  | 160.6979896 | 95.07774038 | 109.9310937 | 106.497372  |
| CMPK1    | 51727  | 2956  | 65.54739083 | 49.5267503  | 55.75172999 | 30.13149516 |
| TALDO1   | 6888   | 1319  | 146.8977159 | 190.9029066 | 159.8651947 | 132.1389318 |
| DNAJB6   | 10049  | 2494  | 77.68969018 | 49.85590942 | 76.2455033  | 55.11194785 |
| JMJD1C   | 221037 | 8762  | 22.09012795 | 30.18744542 | 25.07830995 | 60.39135446 |
| YME1L1   | 10730  | 4036  | 47.95681396 | 41.68450867 | 46.01568514 | 49.45363203 |
| ATM      | 472    | 13147 | 14.72227133 | 14.15268059 | 14.59242134 | 16.18260706 |
| CDK12    | 51755  | 8310  | 23.29166079 | 20.96933327 | 21.10305077 | 18.07487561 |
| WDR26    | 80232  | 6884  | 28.08676859 | 29.29453511 | 30.07830711 | 58.84081272 |
| RAB1B    | 81876  | 1955  | 98.89990536 | 117.856264  | 103.3187887 | 90.91178602 |
| KDM3B    | 51780  | 6830  | 28.27890612 | 31.15742517 | 28.46002642 | 27.91917846 |
| LYST     | 1130   | 13493 | 14.2993065  | 26.60516232 | 11.27436657 | 18.06302164 |
| CERS2    | 29956  | 2505  | 77.02217271 | 76.23457518 | 75.40462142 | 37.98066491 |
| SMG7     | 9887   | 6054  | 31.86992776 | 39.16319401 | 35.03962676 | 54.00109245 |
| ETV6     | 2120   | 5989  | 32.21581944 | 21.95212623 | 40.14727975 | 28.59489365 |
| USP24    | 23358  | 10802 | 17.84263622 | 17.78205649 | 17.46688501 | 10.88790681 |
| HMGCR    | 3156   | 4589  | 41.99959827 | 34.13627748 | 32.36722319 | 36.96565421 |
| DDX54    | 79039  | 4404  | 43.71747736 | 34.15351094 | 41.25905876 | 15.21434006 |
| SERF2    | 10169  | 3446  | 55.8710883  | 64.59949276 | 55.91749923 | 50.51910103 |
| NUP160   | 23279  | 5383  | 35.72866137 | 25.70668721 | 34.54032881 | 14.55321753 |
| PJA2     | 9867   | 4878  | 39.38560844 | 31.7940854  | 40.8882359  | 35.31508044 |
| TARBP1   | 6894   | 5130  | 37.41103544 | 25.84511646 | 27.63588204 | 11.68010593 |
| API5     | 8539   | 3844  | 49.92679807 | 45.50563411 | 62.3301039  | 29.17419097 |
| MGA      | 23269  | 12042 | 15.93743662 | 12.78669533 | 15.08926215 | 9.027096779 |
| ABCF2    | 10061  | 3552  | 54.03114071 | 31.42994793 | 50.56082409 | 14.87441814 |
| KDM5B    | 10765  | 6393  | 30.0201176  | 24.36415558 | 33.9747747  | 33.12069305 |
| INPPL1   | 3636   | 4726  | 40.56585392 | 64.87891964 | 47.61283767 | 61.20838874 |
| SDHA     | 6389   | 2405  | 79.71485473 | 62.17078231 | 76.69505059 | 40.48577259 |
| TTC3     | 7267   | 9021  | 21.22933593 | 17.61220532 | 20.18927661 | 7.090956734 |
| HSPG2    | 3339   | 14294 | 13.38361923 | 2.743707326 | 8.499282061 | 0.750575748 |
| AFF1     | 4299   | 9378  | 20.39938721 | 25.44826246 | 21.08792244 | 38.59488238 |
| NUP155   | 9631   | 4355  | 43.88084205 | 30.03508288 | 43.22726116 | 15.19959545 |
| SKIV2L2  | 23517  | 4222  | 45.21475153 | 37.26193165 | 44.48890404 | 18.93874961 |
| KDM2A    | 22992  | 7393  | 25.82127431 | 28.99567736 | 27.15007755 | 57.47303981 |
| MDC1     | 9656   | 7385  | 25.82157005 | 22.56991851 | 23.97516994 | 10.74503917 |
| PATL1    | 219988 | 4142  | 46.03869985 | 57.99460023 | 43.05271332 | 128.1430417 |
| DDX42    | 11325  | 4014  | 47.45588157 | 44.4110981  | 46.5310735  | 35.45278791 |
| WAC      | 51322  | 3806  | 49.99567064 | 50.87798293 | 55.06949114 | 58.5586385  |
| DDX1     | 1653   | 2706  | 70.31911399 | 48.00866785 | 74.72265951 | 23.48952807 |
| LMNA     | 4000   | 3243  | 58.6121296  | 24.18658804 | 74.33731505 | 23.71969409 |
| CAPZB    | 832    | 2148  | 88.49121801 | 125.2137107 | 103.4783841 | 129.2981378 |
| GRSF1    | 2926   | 6646  | 28.60053209 | 20.48612254 | 28.54855788 | 15.35121079 |
| SLC2A1   | 6513   | 3687  | 51.4984405  | 40.00955717 | 54.55467665 | 48.09538485 |
| SSR2     | 6746   | 1152  | 164.8218317 | 244.8838358 | 187.4418629 | 243.7229452 |
| ZNF317   | 57693  | 4098  | 46.33351638 | 40.89072204 | 42.53536557 | 35.02246555 |
| ANAPC1   | 64682  | 6329  | 30.00075053 | 26.86385503 | 30.11200107 | 10.68276825 |
| CHCHD3   | 54927  | 1622  | 117.0621147 | 99.87630198 | 129.8710894 | 52.66644893 |
| SSR3     | 6747   | 3734  | 50.79549115 | 41.17690211 | 48.71884829 | 19.0827423  |
| ZWINT    | 11130  | 1878  | 100.9959339 | 100.2628427 | 113.4052393 | 44.19373472 |
| HIP1     | 3092   | 7239  | 26.20118303 | 21.70148401 | 20.63521568 | 33.69619835 |
| ARGLU1   | 55082  | 1772  | 106.9221094 | 112.2966069 | 109.2194365 | 68.31402937 |

|          |       |       |             |             |             |             |
|----------|-------|-------|-------------|-------------|-------------|-------------|
| FNBP1    | 23048 | 5457  | 34.71980535 | 34.46413522 | 26.32831917 | 35.35178787 |
| GATAD2A  | 54815 | 5689  | 33.26798938 | 23.61893284 | 31.64257632 | 23.30653986 |
| CITED2   | 10370 | 1930  | 97.95710126 | 75.27819194 | 104.547641  | 94.71153536 |
| EDEM3    | 80267 | 6670  | 28.34440861 | 28.9315     | 24.80299373 | 19.6359032  |
| TPP1     | 1200  | 3540  | 53.40599024 | 167.7539844 | 66.96652606 | 203.1150625 |
| STAU1    | 6780  | 3688  | 51.15196125 | 44.65112636 | 46.00370482 | 62.07891649 |
| EIF3I    | 8668  | 1458  | 129.3885001 | 113.8616942 | 127.2345819 | 52.89807736 |
| CDK16    | 5127  | 3280  | 57.32782762 | 50.00148048 | 46.76607828 | 34.00558033 |
| LPCAT1   | 79888 | 3994  | 47.0282645  | 41.56493494 | 50.30841464 | 28.88944714 |
| GLUD1    | 2746  | 3486  | 53.8814941  | 46.21572894 | 55.57892317 | 25.7246088  |
| PSMD1    | 5707  | 3329  | 56.36122027 | 43.1073142  | 63.21406498 | 30.46466216 |
| CCL5     | 6352  | 1237  | 151.5134326 | 79.08128424 | 145.3543508 | 125.8430037 |
| RCC1     | 1104  | 2858  | 65.4350398  | 46.46895735 | 68.16114415 | 10.4826703  |
| BTK      | 695   | 2611  | 71.62517953 | 86.11190307 | 73.0716735  | 125.6749088 |
| CTNNB1   | 1499  | 3720  | 50.27240424 | 71.94141247 | 41.23460665 | 96.1537099  |
| DUT      | 1854  | 2146  | 87.14508097 | 77.46187457 | 90.67719721 | 24.90271194 |
| GPBP1L1  | 60313 | 3754  | 49.76264187 | 42.50085303 | 47.61505277 | 55.2715995  |
| RAB5B    | 5869  | 3336  | 55.93662213 | 50.43125809 | 45.41102335 | 50.48585551 |
| ABCA2    | 20    | 8171  | 22.83742154 | 18.18986669 | 16.39389777 | 6.044871198 |
| PPP1CB   | 5500  | 4991  | 37.34726212 | 45.13801729 | 39.36983131 | 64.24510497 |
| EIF2AK2  | 5610  | 2930  | 63.5480543  | 37.56974275 | 45.28560755 | 172.9972262 |
| GOT2     | 2806  | 2473  | 75.29146748 | 56.67681306 | 67.66580307 | 20.05461845 |
| MYL6     | 4637  | 827   | 224.8989274 | 281.8415819 | 255.9943542 | 378.422034  |
| COX4I1   | 1327  | 839   | 221.6822562 | 233.7220055 | 210.7811028 | 170.0981506 |
| ARF6     | 382   | 3939  | 47.21792661 | 33.26367571 | 41.78492742 | 33.24993002 |
| MFSD10   | 10227 | 1969  | 94.35603187 | 142.2552995 | 83.69838185 | 59.62861377 |
| ABCF1    | 23    | 3474  | 53.47928231 | 40.41007236 | 56.68318871 | 28.14425469 |
| EIF3D    | 8664  | 1949  | 95.32428258 | 100.1546597 | 96.04838305 | 48.60785421 |
| BASP1    | 10409 | 1820  | 102.0807839 | 135.0464018 | 81.37946028 | 159.829822  |
| KIAA1731 | 85459 | 8044  | 23.0709399  | 24.23901034 | 22.45754239 | 24.05793051 |
| CDC27    | 996   | 5611  | 33.07478891 | 27.48177114 | 31.21637269 | 22.18744443 |
| MMS19    | 64210 | 3703  | 50.0616404  | 35.9854025  | 45.30383487 | 16.12652297 |
| PFKP     | 5214  | 2781  | 66.65884733 | 68.18792331 | 58.6522243  | 60.56124199 |
| ZMYND8   | 23613 | 4652  | 39.84915185 | 56.42667726 | 33.06433927 | 60.04983467 |
| ZNF292   | 23036 | 10100 | 18.33404636 | 15.2673483  | 16.71450736 | 19.44118783 |
| UBXN4    | 23190 | 4018  | 46.03521207 | 46.64068887 | 49.79757815 | 55.31779281 |
| VPS26A   | 9559  | 2707  | 68.33006357 | 57.29277746 | 66.49967369 | 67.3018015  |
| SEPT15   | 9403  | 1851  | 99.81906856 | 82.10258833 | 94.51311853 | 70.21033496 |
| MTA1     | 9112  | 2856  | 64.69366103 | 49.15426869 | 62.80839019 | 19.49157469 |
| WDR82    | 80335 | 4292  | 43.04871759 | 48.75113956 | 46.96310865 | 38.81615895 |
| PRKAR1A  | 5573  | 3657  | 50.52367949 | 79.21315017 | 49.62909762 | 73.73126756 |
| RANBP1   | 5902  | 884   | 208.7790834 | 162.8392696 | 230.4055542 | 61.59882821 |
| BRCA2    | 675   | 11386 | 16.20944228 | 11.46846595 | 15.04935372 | 10.80948083 |
| TCEA1    | 6917  | 2784  | 66.21994381 | 46.98375932 | 67.31666068 | 31.19324074 |
| KIF2A    | 3796  | 3374  | 54.57970878 | 32.29554915 | 50.84861477 | 15.35915498 |
| SERP1    | 27230 | 3181  | 57.8912095  | 39.08853759 | 68.54632937 | 29.65477841 |
| XPO7     | 23039 | 4880  | 37.73605275 | 35.4797123  | 34.55025401 | 19.57918511 |
| XPO4     | 64328 | 9902  | 18.57680784 | 15.07754987 | 17.00605482 | 7.97285968  |
| MAPKAPK3 | 7867  | 2500  | 73.5790205  | 105.8009587 | 80.45723713 | 63.15780524 |
| PRPF19   | 27339 | 2342  | 78.45566399 | 69.74225359 | 83.35914581 | 34.74654266 |
| KIAA0368 | 23392 | 7391  | 24.83273967 | 17.81817301 | 22.86940997 | 11.1471448  |
| CAT      | 847   | 2300  | 79.79946909 | 56.28947384 | 93.97578734 | 40.66179769 |
| PTP4A1   | 7803  | 5099  | 35.95497014 | 26.70146507 | 33.85362817 | 40.97010915 |
| GTPBP4   | 23560 | 2537  | 72.1836841  | 47.16639799 | 71.53867166 | 22.26158958 |
| ATIC     | 471   | 2094  | 87.25942418 | 63.42324742 | 83.04076342 | 29.00126976 |
| AHSA1    | 10598 | 1429  | 127.4374218 | 83.42581269 | 130.5559442 | 44.62217763 |
| PPP3CA   | 5530  | 4676  | 38.94526855 | 20.15787546 | 48.57380634 | 16.45059194 |
| KIF14    | 9928  | 7293  | 24.97025582 | 21.20470084 | 20.5693378  | 8.854354488 |
| CPXM1    | 56265 | 2409  | 75.59488407 | 65.95255468 | 55.07963061 | 31.93149353 |
| CIT      | 11113 | 8708  | 20.91273263 | 19.14088748 | 13.99992045 | 7.787513676 |
| RPL36AL  | 6166  | 549   | 331.3364109 | 375.446691  | 321.7378151 | 301.6153186 |
| KDM5C    | 8242  | 6863  | 26.50498172 | 27.24123889 | 26.81466227 | 31.53088365 |



|          |        |       |             |             |             |             |
|----------|--------|-------|-------------|-------------|-------------|-------------|
| SREK1    | 140890 | 4222  | 43.08472041 | 39.74254183 | 42.98759119 | 31.06913861 |
| ZMYM3    | 9203   | 6136  | 29.61201163 | 27.9993481  | 26.78936511 | 24.5778199  |
| COPG     | 22820  | 3114  | 58.28353154 | 66.04835196 | 60.59001024 | 55.84020336 |
| PTPRA    | 5786   | 3637  | 49.84617296 | 36.08700888 | 54.02662306 | 41.46535686 |
| ADNP     | 23394  | 4713  | 38.42269147 | 33.19086456 | 33.57782437 | 22.16280358 |
| EIF3F    | 8665   | 1274  | 141.9794024 | 151.2953472 | 132.840733  | 50.3688772  |
| HLA-E    | 3133   | 2679  | 67.51838698 | 150.8009173 | 97.95284569 | 533.1609022 |
| MTMR2    | 8898   | 4870  | 37.1000765  | 27.91128084 | 28.6774594  | 14.79767458 |
| USP1     | 7398   | 3949  | 45.7009335  | 40.23289547 | 43.76574697 | 20.40179475 |
| OGDH     | 4967   | 4319  | 41.73850433 | 39.36590379 | 40.70130156 | 28.96527838 |
| RALY     | 22913  | 1589  | 113.447829  | 114.2911504 | 91.34841476 | 84.71692503 |
| TUBA1C   | 84790  | 1581  | 113.8926085 | 122.0576249 | 109.9856791 | 70.16509608 |
| GLG1     | 2734   | 9448  | 19.05844772 | 18.91530622 | 16.79454443 | 22.00406882 |
| PDAP1    | 11333  | 2707  | 66.51799558 | 57.04582583 | 77.42685012 | 35.96907391 |
| IFI6     | 2537   | 860   | 209.3769931 | 120.2260067 | 112.7670994 | 2853.305438 |
| NAT10    | 55226  | 4058  | 44.32228385 | 41.12904901 | 43.94389812 | 20.35263087 |
| OSBPL8   | 114882 | 7259  | 24.74933761 | 16.02406136 | 28.37892855 | 19.01866435 |
| PPP3R1   | 5534   | 3111  | 57.74845442 | 53.57725753 | 57.45641534 | 54.46253883 |
| SMU1     | 55234  | 7091  | 25.33569901 | 19.13765407 | 23.83694953 | 14.73040379 |
| RPL36A   | 6173   | 2361  | 76.09294439 | 75.69327114 | 67.02765195 | 37.46777345 |
| MGEA5    | 10724  | 5220  | 34.37759685 | 37.52297507 | 32.42128235 | 49.52139042 |
| UCHL5    | 51377  | 5108  | 35.09136049 | 25.73830932 | 34.91079456 | 13.75153004 |
| SMS      | 6611   | 1844  | 97.20535216 | 92.32330322 | 101.9758338 | 91.5540519  |
| CSNK1A1  | 1452   | 3149  | 56.92177497 | 59.86549739 | 56.36049525 | 89.28983507 |
| IRAK3    | 11213  | 8351  | 21.46409644 | 20.83969905 | 20.6199354  | 9.186988272 |
| LSM12    | 124801 | 2507  | 71.41694583 | 54.93043445 | 67.42234108 | 39.72676529 |
| PPRC1    | 23082  | 5354  | 33.40267035 | 22.97415801 | 31.53091601 | 8.507003019 |
| UCP2     | 7351   | 1646  | 108.5258268 | 146.0731876 | 96.27191435 | 62.47500752 |
| CNOT7    | 29883  | 2646  | 67.51077508 | 45.72870288 | 66.19617051 | 34.04415874 |
| C6orf62  | 81688  | 2498  | 71.51061284 | 75.2885452  | 81.62121486 | 179.9817873 |
| IK       | 3550   | 1955  | 91.26809448 | 91.18473033 | 96.18590159 | 82.62825199 |
| UPF1     | 5976   | 5360  | 33.2890158  | 31.72039897 | 33.62423534 | 31.57285997 |
| STAT6    | 6778   | 4050  | 44.00610828 | 75.59805156 | 37.82258074 | 96.01625821 |
| FAM168B  | 130074 | 5420  | 32.88279309 | 29.31359856 | 31.06899535 | 12.32500457 |
| DOT1L    | 84444  | 7455  | 23.85190693 | 24.09163567 | 22.44634889 | 22.32012412 |
| TMEM194  | 23306  | 5632  | 31.57243718 | 17.25054165 | 30.01203997 | 16.13823854 |
| TXNIP    | 10628  | 2953  | 60.21536275 | 124.8859103 | 65.03821472 | 378.2602322 |
| BRCA1    | 672    | 7287  | 24.40180681 | 26.05371859 | 26.03728773 | 13.50081342 |
| HINT1    | 3094   | 971   | 182.9161483 | 140.2170653 | 175.1639886 | 58.16442097 |
| TTC37    | 9652   | 5704  | 31.13807504 | 24.7288025  | 28.04042152 | 17.14115372 |
| LAT2     | 7462   | 2199  | 80.67630462 | 62.3201915  | 70.04392498 | 44.00227217 |
| TMED5    | 50999  | 6154  | 28.8279483  | 20.60315203 | 27.56933106 | 24.90065799 |
| PPP2R1A  | 5518   | 2519  | 70.42762758 | 64.48790281 | 68.44317796 | 42.75194724 |
| EXOSC10  | 5394   | 2834  | 62.52745508 | 41.20124446 | 62.40132155 | 24.57146396 |
| SLC30A9  | 10463  | 3272  | 54.0948721  | 52.43923204 | 57.53506185 | 36.06846794 |
| AP3D1    | 8943   | 4863  | 36.35493221 | 33.12935042 | 32.45521627 | 33.05130931 |
| MLLT1    | 4298   | 4530  | 39.02738087 | 30.79321427 | 38.29244792 | 16.71266992 |
| PPP2R5C  | 5527   | 4494  | 39.34001677 | 34.46121849 | 39.0223302  | 38.42274591 |
| BTAF1    | 9044   | 7054  | 25.03397352 | 20.72274471 | 25.01031695 | 20.94883328 |
| RNF40    | 9810   | 6022  | 29.32408655 | 28.08535498 | 30.20859839 | 28.23650695 |
| UHMK1    | 127933 | 8535  | 20.69005849 | 20.8864848  | 20.59624153 | 25.99438006 |
| RAD23A   | 5886   | 1793  | 98.48837099 | 127.6347837 | 80.83733759 | 85.01334847 |
| MYO9B    | 4650   | 7652  | 23.05087076 | 34.6829231  | 23.49756037 | 57.61762461 |
| MED13    | 9969   | 10474 | 16.84029626 | 15.04131259 | 13.77768684 | 29.24144259 |
| GBE1     | 2632   | 3118  | 56.57000097 | 82.8297247  | 66.13660266 | 31.94195015 |
| CDC20    | 991    | 1697  | 103.8190199 | 79.57372242 | 87.52692236 | 20.99439003 |
| BST2     | 684    | 983   | 179.2277486 | 126.9443575 | 117.3565409 | 442.3369254 |
| VPS13A   | 23230  | 11262 | 15.64383563 | 12.46533399 | 12.21331732 | 7.78296019  |
| NUP62    | 23636  | 3602  | 48.91195915 | 47.14006268 | 50.0349532  | 45.97079675 |
| SRSF4    | 6429   | 2535  | 69.418734   | 61.97122002 | 68.26123059 | 64.28214386 |
| KIAA1033 | 23325  | 5823  | 30.22093263 | 26.21335893 | 33.7083193  | 86.59630734 |
| PPT1     | 5538   | 2504  | 70.19652736 | 57.84394772 | 82.35380475 | 41.14867861 |

|          |        |       |             |             |             |             |
|----------|--------|-------|-------------|-------------|-------------|-------------|
| RBM33    | 155435 | 10325 | 17.02393264 | 16.05690242 | 15.90007357 | 16.48839455 |
| DLGAP5   | 9787   | 3084  | 56.92857275 | 42.55786359 | 45.21658317 | 15.1624732  |
| BCCIP    | 56647  | 2373  | 73.89942359 | 53.52491795 | 78.26350832 | 31.56286527 |
| FRYL     | 285527 | 11706 | 14.98063661 | 14.46718268 | 13.97013543 | 14.71612527 |
| NOTCH2   | 4853   | 11474 | 15.2835395  | 54.94105501 | 12.59532654 | 45.37624503 |
| SRSF5    | 6430   | 1651  | 105.968843  | 119.5819253 | 120.8072772 | 96.61656209 |
| ZDHC20   | 253832 | 5356  | 32.66515307 | 35.86291528 | 35.97679282 | 25.36030005 |
| CDCA7    | 83879  | 2839  | 61.62541735 | 27.31446787 | 61.91931013 | 6.773773153 |
| AARS     | 16     | 3344  | 52.31894732 | 53.24261815 | 47.1978818  | 34.32331498 |
| ERAP2    | 64167  | 5691  | 30.70640901 | 100.7856845 | 23.53796147 | 115.460216  |
| RACGAP1  | 29127  | 3326  | 52.54064151 | 38.45639238 | 42.49834797 | 15.64167702 |
| TAPBP    | 6892   | 3779  | 46.24243813 | 117.1065657 | 45.84638908 | 154.1651939 |
| SMEK2    | 57223  | 4470  | 39.09399859 | 44.3671341  | 38.19196581 | 34.46272141 |
| CCNB2    | 9133   | 1566  | 111.5901492 | 98.75216042 | 95.5233787  | 35.28932285 |
| RRP1B    | 23076  | 5087  | 34.3121265  | 22.90967056 | 37.21469357 | 9.470821581 |
| PPP1R12A | 4659   | 5726  | 30.41163381 | 37.3982204  | 30.44183167 | 47.16033936 |
| DAP      | 1611   | 2385  | 73.01342355 | 67.64396803 | 62.36665493 | 64.59050931 |
| CHD2     | 1106   | 9374  | 18.55479294 | 31.2831036  | 21.48009148 | 44.63627691 |
| ATP13A1  | 57130  | 3887  | 44.58952161 | 59.79276825 | 47.39910263 | 74.31592165 |
| CHD1     | 1105   | 6457  | 26.84210477 | 29.95489707 | 27.68265574 | 34.64207737 |
| GIT2     | 9815   | 5643  | 30.7140653  | 46.12237742 | 34.44656751 | 58.07767661 |
| RPAP3    | 79657  | 3687  | 47.00826431 | 47.08073269 | 50.6006087  | 50.51113478 |
| GAS7     | 8522   | 8211  | 21.10820491 | 25.15721578 | 28.58815855 | 17.9230037  |
| P2RY8    | 286530 | 4240  | 40.82902932 | 21.2321709  | 42.70543408 | 13.55891441 |
| TXNDC12  | 51060  | 1616  | 107.125671  | 85.35484644 | 102.1122516 | 67.39277739 |
| PSMC1    | 5700   | 1586  | 109.0231388 | 83.45688193 | 118.2981514 | 90.11020003 |
| SPG20    | 23111  | 5031  | 34.32842616 | 29.98563458 | 21.71222851 | 25.50981895 |
| NIPA2    | 81614  | 3477  | 49.61228813 | 41.84922149 | 53.5351955  | 29.51723713 |
| DAZAP1   | 26528  | 2274  | 75.85836668 | 74.27756158 | 77.21092203 | 42.72904759 |
| FAM122B  | 159090 | 4277  | 40.33245869 | 41.10708166 | 41.69378971 | 27.0725531  |
| SAP18    | 10284  | 2318  | 74.3302587  | 60.37054617 | 71.00553456 | 58.94714517 |
| RUNX1    | 861    | 7274  | 23.68676652 | 24.01716041 | 28.17517439 | 38.7102761  |
| SREBF2   | 6721   | 4325  | 39.79032451 | 57.39551695 | 32.14459491 | 52.42088474 |
| CERS6    | 253782 | 6259  | 27.49531131 | 37.0616432  | 26.02660984 | 29.39891938 |
| ZC3H15   | 55854  | 2149  | 80.08057398 | 67.29567817 | 84.35659621 | 46.90999244 |
| OSBPL9   | 114883 | 3925  | 43.79331652 | 34.915185   | 53.56135989 | 34.91575547 |
| SLC25A36 | 55186  | 4677  | 36.66452747 | 33.06518777 | 35.10118871 | 24.4974848  |
| PLEKHB2  | 55041  | 4326  | 39.63938858 | 35.90253843 | 42.34486549 | 45.24935517 |
| AQR      | 9716   | 5106  | 33.54398919 | 33.03649478 | 36.66241648 | 29.33751637 |
| TRIM25   | 7706   | 5744  | 29.81817702 | 34.52665206 | 27.21983346 | 92.12204871 |
| CEBPZ    | 10153  | 3341  | 51.26477367 | 36.88311124 | 48.12562209 | 25.87163259 |
| FAM208A  | 23272  | 8296  | 20.64556519 | 19.44682543 | 16.91093076 | 17.00734299 |
| MAN2A2   | 4122   | 6279  | 27.24497892 | 26.86484191 | 26.51574963 | 32.56141927 |
| LETM1    | 3954   | 5462  | 31.32025314 | 21.90793697 | 30.94613861 | 8.931775169 |
| EPB41    | 2035   | 5999  | 28.51662321 | 23.58705698 | 31.6979972  | 25.94895743 |
| EBF3     | 253738 | 4361  | 39.22752182 | 3.014704976 | 26.93747473 | 0.881941847 |
| FNBP4    | 23360  | 4127  | 41.45171375 | 38.60561415 | 41.31495091 | 28.74323084 |
| IMPAD1   | 54928  | 7239  | 23.60365195 | 22.99433838 | 23.40798157 | 17.56117225 |
| ATP5C1   | 509    | 1162  | 146.6936869 | 135.7706892 | 146.9174588 | 98.42711495 |
| USP48    | 84196  | 4465  | 38.17649813 | 24.80354856 | 37.28832966 | 15.95855762 |
| PIKFYVE  | 200576 | 9901  | 17.19560428 | 16.3394131  | 15.02317665 | 18.19631229 |
| GNB4     | 59345  | 6428  | 26.4862598  | 18.51161382 | 22.97573867 | 23.14642412 |
| TP53BP1  | 7158   | 6236  | 27.30174438 | 20.54663145 | 25.47885512 | 18.63280426 |
| HCLS1    | 3059   | 2050  | 83.05057462 | 139.8954465 | 90.80091452 | 168.1640749 |
| RBPJ     | 3516   | 2499  | 68.0469355  | 57.5138382  | 70.09006289 | 82.05699807 |
| DDX18    | 8886   | 3790  | 44.81395927 | 34.98296766 | 53.07205615 | 23.98167796 |
| COX6A1   | 1337   | 548   | 309.5629917 | 330.5893662 | 296.1071108 | 274.0916356 |
| MAR7     | 64844  | 3484  | 48.63264446 | 46.2422592  | 46.27160532 | 50.7234206  |
| MYADM    | 91663  | 3243  | 52.24672627 | 132.545251  | 66.38889048 | 143.2544682 |
| ANKRD13  | 338692 | 2233  | 75.78672062 | 61.77045762 | 56.86616282 | 51.58173893 |
| MIA3     | 375056 | 8123  | 20.83365101 | 12.37197351 | 18.41556211 | 18.54081916 |
| IDH2     | 3418   | 1740  | 96.90723485 | 123.966689  | 92.40672609 | 79.80816091 |

|          |          |       |             |             |             |             |
|----------|----------|-------|-------------|-------------|-------------|-------------|
| NRAS     | 4893     | 4454  | 37.8577882  | 29.31745695 | 38.28172484 | 25.81490664 |
| ADPGK    | 83440    | 2786  | 60.30345662 | 59.66733052 | 68.17839213 | 81.23311873 |
| RCOR1    | 23186    | 5537  | 30.30540798 | 38.83574874 | 29.72563285 | 40.72706399 |
| ETNK1    | 55500    | 7101  | 23.6306216  | 22.1232281  | 22.55370358 | 31.15825197 |
| CBL      | 867      | 11242 | 14.92626258 | 29.53395306 | 15.76836104 | 31.94349785 |
| POLR1D   | 51082    | 2210  | 75.92807419 | 84.39409825 | 83.74907283 | 56.97319129 |
| QSER1    | 79832    | 9271  | 18.07751675 | 15.40672537 | 15.38315326 | 17.77338954 |
| ATP6VOC  | 527      | 1180  | 142.0310659 | 159.0043395 | 155.2405831 | 226.6173966 |
| DDX23    | 9416     | 3288  | 50.91005828 | 53.53948326 | 53.91359939 | 40.94136066 |
| XK       | 7504     | 5089  | 32.89295964 | 35.51135927 | 36.99247836 | 25.05996928 |
| HMMR     | 3161     | 3144  | 53.17680835 | 40.3281799  | 33.80287372 | 15.64574227 |
| SNRPA    | 6626     | 1646  | 101.1997126 | 89.48505748 | 93.83302585 | 41.69099911 |
| CASC4    | 113201   | 3985  | 41.80043336 | 35.56376098 | 34.56905004 | 42.06050151 |
| PCF11    | 51585    | 5932  | 28.08070245 | 24.45449726 | 26.28593289 | 22.01055573 |
| STK4     | 6789     | 6344  | 26.22483304 | 37.44319703 | 31.07324753 | 53.670452   |
| PTPN6    | 5777     | 2464  | 67.43748158 | 129.5034109 | 67.91295901 | 167.1023974 |
| CAB39    | 51719    | 3968  | 41.82499205 | 46.10525055 | 46.85750756 | 49.68893965 |
| PBRM1    | 55193    | 7592  | 21.86005907 | 18.52047209 | 21.03942039 | 10.77203117 |
| ADAM15   | 8751     | 2970  | 55.81049909 | 50.34368063 | 49.15749835 | 15.40367779 |
| ARRB2    | 409      | 1936  | 85.51280791 | 95.18730903 | 100.2947808 | 158.6180708 |
| NAMPT    | 10135    | 4593  | 36.04458875 | 49.87415631 | 39.60726748 | 163.2917347 |
| SCCPDH   | 51097    | 2482  | 66.7013683  | 43.72260978 | 68.27170774 | 36.04897559 |
| KIAA0528 | 9847     | 4430  | 37.3246975  | 27.36365248 | 31.23962047 | 28.37659682 |
| KIF2C    | 11004    | 2896  | 57.09544542 | 44.08947802 | 47.13050961 | 24.67451265 |
| CKS2     | 1164     | 627   | 263.7135725 | 153.5306536 | 233.1882853 | 70.05911206 |
| APEH     | 327      | 2775  | 59.51135992 | 51.31174254 | 56.11418707 | 26.04219967 |
| KIAA1430 | 57587    | 4892  | 33.75797706 | 22.31970882 | 31.09669423 | 10.26213369 |
| KIF23    | 9493     | 3697  | 44.61445432 | 35.50133928 | 31.6041312  | 11.00573477 |
| VDAC3    | 7419     | 1461  | 112.8950292 | 89.98718959 | 124.0809892 | 54.86778216 |
| NARS     | 4677     | 2868  | 57.5103339  | 41.64516005 | 61.88256609 | 28.79741147 |
| ETFA     | 2108     | 1369  | 120.3325431 | 114.4275949 | 115.2883249 | 72.60231681 |
| ARF4     | 378      | 1758  | 93.70605884 | 90.75551893 | 82.92746606 | 101.2144315 |
| ANKLE2   | 23141    | 4491  | 36.68119605 | 27.48815572 | 36.83722292 | 25.06133329 |
| PDCD4    | 27250    | 3728  | 44.13381579 | 43.75362801 | 40.01261843 | 46.91484377 |
| SNX1     | 6642     | 8221  | 20.01348562 | 17.88949908 | 20.22638453 | 19.87107315 |
| R3HDM1   | 23518    | 4666  | 35.21784807 | 24.59469195 | 34.86696662 | 14.70711199 |
| NT5C2    | 22978    | 5361  | 30.65220651 | 54.40924908 | 34.36678081 | 80.50332696 |
| ATG13    | 9776     | 5966  | 27.54382821 | 15.42572893 | 25.03827125 | 20.05287596 |
| ADK      | 132      | 2288  | 71.8210136  | 48.40377811 | 67.411659   | 19.46431375 |
| LSM14A   | 26065    | 3772  | 43.56481419 | 33.20041591 | 47.72391747 | 25.38410715 |
| NFX1     | 4799     | 4721  | 34.76426455 | 24.92176605 | 33.52092486 | 22.25388263 |
| ALKBH5   | 54890    | 3449  | 47.52615447 | 35.92199847 | 47.96635783 | 33.21969743 |
| MTOR     | 2475     | 8733  | 18.7231117  | 14.92695758 | 17.0566537  | 9.526882248 |
| LOC10050 | 1.01E+08 | 2538  | 64.34379364 | 44.77725344 | 66.01608186 | 17.46726595 |
| ECHS1    | 1892     | 1350  | 120.966332  | 123.795936  | 115.6588434 | 73.02433797 |
| SHISA5   | 51246    | 2166  | 75.39452829 | 66.15023836 | 65.74604301 | 98.87799492 |
| SETD8    | 387893   | 2765  | 58.9874004  | 51.25554701 | 58.30389617 | 27.16134111 |
| KIAA0664 | 23277    | 5252  | 31.05486712 | 22.23235468 | 30.01112566 | 11.56295866 |
| SLC27A2  | 11001    | 2408  | 67.73262546 | 20.91369882 | 71.59815834 | 18.41026619 |
| CUL1     | 8454     | 3226  | 50.55801677 | 42.5495765  | 47.87636719 | 27.73513869 |
| CYTH2    | 9266     | 4607  | 35.40268333 | 32.16490891 | 34.39626026 | 29.04395017 |
| NF1      | 4763     | 12444 | 13.09030665 | 16.58173144 | 10.66271538 | 19.16274514 |
| GIGYF2   | 26058    | 7959  | 20.44118479 | 21.64212405 | 19.32595882 | 20.88127861 |
| MAX      | 4149     | 2169  | 75.00755637 | 56.4016339  | 75.59104418 | 63.46317511 |
| NAE1     | 8883     | 1918  | 84.8234566  | 51.35143204 | 83.6106016  | 21.95266084 |
| ANO6     | 196527   | 6196  | 26.25748705 | 28.69923861 | 25.57514058 | 28.58703278 |
| SEC62    | 7095     | 6541  | 24.87255615 | 33.55606092 | 26.61651787 | 46.05016788 |
| TP53     | 7157     | 2719  | 59.7598395  | 70.89013325 | 53.30685778 | 32.60898932 |
| TACC1    | 6867     | 7802  | 20.82632704 | 18.73599605 | 21.09597912 | 17.07231374 |
| GOLGA4   | 2803     | 7886  | 20.57857183 | 18.70596466 | 21.46070173 | 24.30891874 |
| FLNB     | 2317     | 9560  | 16.97516919 | 10.48898621 | 12.53121963 | 16.13502025 |
| ANKRD52  | 283373   | 8656  | 18.74799185 | 15.54886109 | 13.13207043 | 9.401155604 |

|          |        |       |             |             |             |             |
|----------|--------|-------|-------------|-------------|-------------|-------------|
| UQCRB    | 7381   | 4442  | 36.48767025 | 40.63360528 | 39.19375132 | 24.10735446 |
| DCP2     | 167227 | 10198 | 15.89313897 | 14.31216008 | 12.18233376 | 10.36162644 |
| CALCOCO2 | 10241  | 3299  | 49.06754928 | 38.29831229 | 42.58998676 | 48.47493232 |
| ARIH1    | 25820  | 5267  | 30.73359504 | 26.82284453 | 28.36117833 | 27.97953526 |
| POM121   | 9883   | 5997  | 26.95838901 | 24.9325882  | 26.0362579  | 16.81000063 |
| VMA21    | 203547 | 4760  | 33.92123377 | 21.67469181 | 32.62485286 | 12.12021553 |
| SHOC2    | 8036   | 3962  | 40.75342573 | 33.52051492 | 43.08886602 | 44.80820616 |
| ESD      | 2098   | 1208  | 133.4939458 | 96.1058185  | 115.2621339 | 36.36346296 |
| AFF4     | 27125  | 9580  | 16.83305705 | 20.53875372 | 14.9972482  | 32.83658174 |
| B7H6     | 374383 | 6382  | 25.26804867 | 18.01655677 | 20.22798326 | 3.742808811 |
| FAM78A   | 286336 | 3957  | 40.70161749 | 45.83922299 | 42.18219901 | 31.35933611 |
| TNPO2    | 30000  | 5092  | 31.62928131 | 22.01194824 | 28.04958733 | 12.88039112 |
| IVNS1ABP | 10625  | 4205  | 38.25253609 | 97.92979819 | 31.70527572 | 98.44637925 |
| ZAK      | 51776  | 7194  | 22.35917629 | 8.765867359 | 18.73779229 | 4.051953887 |
| RANGAP1  | 5905   | 3040  | 52.9118139  | 30.27299303 | 43.36897733 | 17.71252551 |
| C11orf58 | 10944  | 3980  | 40.36370052 | 34.04077194 | 44.75202357 | 38.60389623 |
| ZFP91    | 80829  | 5735  | 28.01177473 | 30.7342029  | 27.44675627 | 21.07236812 |
| LOC28366 | 283663 | 2534  | 63.39681455 | 52.23465459 | 44.60826651 | 8.787361849 |
| PGM2     | 55276  | 3238  | 49.55007471 | 60.4910222  | 54.35460352 | 54.07688896 |
| RBM27    | 54439  | 6555  | 24.47645186 | 21.04247626 | 23.7876665  | 17.47898344 |
| CCDC47   | 57003  | 3445  | 46.57275527 | 37.77482958 | 53.60315862 | 33.4345495  |
| SRSF7    | 6432   | 2489  | 64.37876888 | 59.26686914 | 64.85398059 | 33.99568691 |
| SCAF4    | 57466  | 4269  | 37.53543119 | 32.20608257 | 36.37720768 | 23.28240143 |
| RXRA     | 6256   | 5547  | 28.88746273 | 11.85066558 | 35.04272227 | 17.62630986 |
| MRPS27   | 23107  | 2797  | 57.21643532 | 53.53720563 | 59.37426615 | 12.52062685 |
| HERC1    | 8925   | 15216 | 10.51750589 | 12.97514187 | 10.94192902 | 14.35467555 |
| RUVBL1   | 8607   | 1785  | 89.65510901 | 47.56260666 | 84.15880411 | 15.30974594 |
| INTS6    | 26512  | 7465  | 21.4105805  | 14.35800688 | 21.17093121 | 15.34825672 |
| BANF1    | 8815   | 1179  | 135.5640232 | 115.1018702 | 129.5664822 | 63.01220755 |
| NAA25    | 80018  | 5825  | 27.43862376 | 18.09439655 | 25.6080758  | 9.035451394 |
| LYZ      | 4069   | 1516  | 105.1591102 | 14.40475139 | 98.11640633 | 28.4415223  |
| MBTPS1   | 8720   | 4354  | 36.61488541 | 30.50259075 | 40.76233338 | 25.19899948 |
| USO1     | 8615   | 3998  | 39.87524039 | 29.65157286 | 38.94869163 | 30.63268186 |
| TRIM33   | 51592  | 8339  | 19.09303572 | 16.72781636 | 18.03990288 | 15.63307204 |
| CUL3     | 8452   | 6784  | 23.46946122 | 18.98544985 | 25.00908953 | 15.63571996 |
| UBE4A    | 9354   | 6144  | 25.91419676 | 29.59496594 | 25.24137611 | 27.60992629 |
| CASC3    | 22794  | 4198  | 37.92682823 | 29.45977609 | 36.89178897 | 28.98040654 |
| EP300    | 2033   | 8761  | 18.17336205 | 23.34897895 | 19.02792794 | 33.96534968 |
| SUPT6H   | 6830   | 5896  | 26.96954524 | 37.75608074 | 30.63915722 | 42.77923393 |
| BRD7     | 29117  | 2330  | 68.24568186 | 58.05126165 | 80.25193726 | 58.99107208 |
| GOLPH3   | 64083  | 2676  | 59.34531112 | 62.53637752 | 68.77018952 | 63.84527666 |
| RAB11B   | 9230   | 1635  | 97.13030738 | 130.7012506 | 96.79038915 | 136.4382917 |
| ANXA1    | 301    | 1399  | 113.3693112 | 46.98759257 | 122.4817309 | 62.21902149 |
| AP1G1    | 164    | 6850  | 23.15381991 | 23.90978442 | 22.05381086 | 27.39438773 |
| NCBP1    | 4686   | 5381  | 29.47475681 | 26.46164013 | 28.4278326  | 12.67766713 |
| TUBGCP3  | 10426  | 3908  | 40.58435681 | 42.70769725 | 35.84488147 | 21.85900209 |
| TMX2     | 51075  | 1818  | 87.2407406  | 79.67065186 | 93.78812014 | 57.3437098  |
| ELOVL5   | 60481  | 3003  | 52.74701306 | 121.6935075 | 59.24134834 | 74.6216288  |
| MYSM1    | 114803 | 7768  | 20.36494517 | 15.94940431 | 18.84916833 | 15.34894442 |
| UQCRC1   | 7384   | 1636  | 96.69614552 | 96.84232204 | 102.1554072 | 71.14706369 |
| ZMYM4    | 9202   | 7011  | 22.56381316 | 18.59322787 | 22.84322481 | 24.97517707 |
| MGST1    | 4257   | 987   | 160.2785148 | 118.3022561 | 98.89925    | 15.79232264 |
| GAPVD1   | 26130  | 6906  | 22.87728177 | 26.8457564  | 24.50609526 | 24.18242281 |
| STXBP2   | 6813   | 1910  | 82.61053494 | 147.5829038 | 107.1910648 | 187.3791779 |
| KIF22    | 3835   | 2097  | 75.14627352 | 64.71392704 | 61.96477265 | 22.20249808 |
| ACTR1A   | 10121  | 2891  | 54.5076913  | 51.56522521 | 55.03197001 | 41.10195177 |
| GTF2I    | 2969   | 4529  | 34.79393587 | 34.98212384 | 36.71475098 | 26.01315925 |
| DHCR7    | 1717   | 2665  | 59.13010715 | 101.3407932 | 45.66604974 | 41.47323046 |
| IPO4     | 79711  | 3606  | 43.64319173 | 23.35850106 | 39.37419846 | 5.052301072 |
| LMAN2    | 10960  | 1853  | 84.82081124 | 91.03310434 | 95.32329223 | 74.28582127 |
| DCTN1    | 1639   | 4518  | 34.78817247 | 23.97004975 | 32.73557613 | 19.31094288 |
| HMGB3    | 3149   | 3556  | 44.19937099 | 23.31095577 | 43.61164647 | 6.546490225 |

|          |        |       |             |             |             |             |
|----------|--------|-------|-------------|-------------|-------------|-------------|
| EZH2     | 2146   | 2723  | 57.64545614 | 40.75309475 | 54.1596634  | 19.17981882 |
| SEPT9    | 10801  | 4469  | 35.12387045 | 24.03342001 | 36.87673168 | 18.39027039 |
| TRIM14   | 9830   | 4454  | 35.2421592  | 69.54140813 | 27.89300397 | 89.98858299 |
| KIAA1967 | 57805  | 4012  | 39.02288253 | 35.93538062 | 40.55066457 | 25.0261007  |
| CAPN1    | 823    | 3125  | 50.09913751 | 50.27105368 | 59.4977888  | 52.21045233 |
| C15orf42 | 90381  | 6688  | 23.37850158 | 16.49255068 | 20.28182069 | 6.507506809 |
| CHD3     | 1107   | 7372  | 21.20936226 | 25.51150107 | 16.50841326 | 15.70663451 |
| DLAT     | 1737   | 4352  | 35.9272561  | 25.7547887  | 33.79002617 | 12.1401501  |
| NOB1     | 28987  | 1733  | 90.10446185 | 60.04781522 | 76.32098131 | 26.16506942 |
| ATP5J2   | 9551   | 528   | 295.7405916 | 286.9814879 | 314.9263394 | 175.9750911 |
| FARSB    | 10056  | 2233  | 69.92880985 | 34.32800876 | 62.3540787  | 10.87839837 |
| ALCAM    | 214    | 4760  | 32.76190047 | 18.49136775 | 31.6927142  | 8.420360266 |
| TBRG4    | 9238   | 2299  | 67.832382   | 48.269107   | 61.20732974 | 27.11965628 |
| NAP1L4   | 4676   | 2564  | 60.82162489 | 49.88532022 | 61.06162565 | 26.60628971 |
| TTLL12   | 23170  | 3421  | 45.58510559 | 27.68310173 | 37.11842782 | 10.35517422 |
| GTF3C1   | 2975   | 7124  | 21.86163111 | 18.04807118 | 20.73105674 | 12.78677545 |
| MARS     | 4141   | 2932  | 53.04838809 | 44.30813615 | 55.99190299 | 35.83239423 |
| CDT1     | 81620  | 2742  | 56.72424285 | 52.90447767 | 49.00696872 | 19.41604338 |
| MTR      | 4548   | 10558 | 14.73175543 | 12.09349577 | 13.3678936  | 5.579352067 |
| GPBP1    | 65056  | 4633  | 33.43939464 | 29.05049462 | 31.10213841 | 49.11073645 |
| SAFB     | 6294   | 3121  | 49.57396002 | 39.55440799 | 51.9241948  | 33.46789275 |
| DDX50    | 79009  | 2575  | 60.08556474 | 43.87424123 | 53.7442791  | 25.94233972 |
| USP14    | 9097   | 4156  | 37.22818316 | 21.76854427 | 30.09638564 | 13.54071797 |
| AGPS     | 8540   | 7674  | 20.13499388 | 20.03577697 | 21.39278858 | 11.73844723 |
| RUNX2    | 860    | 5720  | 27.01327676 | 10.55728279 | 19.09689189 | 20.45522426 |
| CDK4     | 1019   | 1474  | 104.8276411 | 62.58665637 | 92.88502399 | 24.85727557 |
| TPCN1    | 53373  | 5472  | 28.20021142 | 13.96776514 | 27.76201451 | 6.732831334 |
| KAT6A    | 7994   | 9285  | 16.61944608 | 15.28749813 | 14.6772936  | 12.97201653 |
| PSMB1    | 5689   | 938   | 164.5112547 | 116.1675723 | 168.2619581 | 90.42398036 |
| TNKS2    | 80351  | 6274  | 24.56282606 | 26.56659997 | 24.78571635 | 48.75199425 |
| SEC31A   | 22872  | 4273  | 36.01750165 | 27.84756697 | 41.09001561 | 26.38728684 |
| AHCYL1   | 10768  | 4024  | 38.24621882 | 28.35246883 | 34.65406126 | 37.6787322  |
| LGALS3BP | 3959   | 2277  | 67.50039454 | 133.8757632 | 41.29192745 | 540.7882184 |
| TAF1D    | 79101  | 1323  | 116.1741484 | 109.647829  | 112.5893853 | 88.43830899 |
| KDELR2   | 11014  | 2874  | 53.47891384 | 47.91600528 | 44.99174459 | 27.82164261 |
| RPS6KA3  | 6197   | 7723  | 19.90138526 | 20.39915941 | 26.40033597 | 17.84980651 |
| SNW1     | 22938  | 2146  | 71.52563476 | 67.18208156 | 74.03827612 | 69.14275701 |
| NUP107   | 57122  | 3158  | 48.60481704 | 38.8087323  | 48.3051291  | 17.24299054 |
| SLC6A6   | 6533   | 6516  | 23.55647824 | 33.24023474 | 20.03897829 | 67.01029119 |
| SETD2    | 29072  | 8452  | 18.16067347 | 19.6415464  | 19.52359189 | 22.39363309 |
| PSD4     | 23550  | 5039  | 30.42064418 | 38.51702092 | 29.64443864 | 45.87691238 |
| GNAI3    | 2773   | 4730  | 32.40795476 | 24.30902015 | 34.03784105 | 25.20731507 |
| AP2A1    | 160    | 3499  | 43.80955302 | 43.36926502 | 40.27634634 | 28.46384698 |
| LEO1     | 123169 | 2162  | 70.90176967 | 48.64802368 | 78.96303755 | 33.80056407 |
| PTCD3    | 55037  | 6752  | 22.67257699 | 19.60346782 | 22.4677812  | 11.51254197 |
| CSNK2A1  | 1457   | 2849  | 53.73297293 | 40.59324794 | 51.0969465  | 28.56314598 |
| ZNF146   | 7705   | 3880  | 39.45495873 | 24.29335713 | 39.5342105  | 12.99092445 |
| PPHLN1   | 51535  | 3484  | 43.93950628 | 39.52657841 | 41.29877224 | 31.78202871 |
| SLC39A10 | 57181  | 5386  | 28.38485958 | 13.28059632 | 21.61490968 | 2.706067236 |
| TCF12    | 6938   | 4806  | 31.81041483 | 25.13011135 | 28.13613135 | 22.53421591 |
| FUBP1    | 8880   | 2884  | 52.86826677 | 61.19399664 | 59.85424758 | 51.37930918 |
| PARK7    | 11315  | 979   | 155.7426776 | 158.190721  | 157.977983  | 71.74955612 |
| MCM3AP   | 8888   | 6113  | 24.94226752 | 21.25166943 | 25.2656896  | 19.50443322 |
| MCMBP    | 79892  | 4241  | 35.95191732 | 19.75597488 | 42.1971688  | 16.32413844 |
| RPS6KA1  | 6195   | 3199  | 47.59852929 | 78.7820464  | 70.47228521 | 109.8519869 |
| PLP2     | 5355   | 1049  | 145.1550955 | 76.04776086 | 183.8922661 | 55.76924823 |
| CCND3    | 896    | 2104  | 72.17629413 | 50.51862672 | 87.0645856  | 59.84351367 |
| ZKSCAN1  | 7586   | 5494  | 27.64086692 | 25.79570213 | 22.03606994 | 21.3335114  |
| NOM1     | 64434  | 6082  | 24.96858317 | 20.33412365 | 26.22821355 | 8.054551929 |
| EPT1     | 85465  | 8143  | 18.62391461 | 13.35408942 | 16.78757713 | 12.70307614 |
| PSMB4    | 5692   | 925   | 163.7298925 | 152.2489262 | 163.774242  | 111.3905851 |
| PAFAH1B2 | 5049   | 4200  | 36.05955965 | 29.97630164 | 30.18353734 | 27.56888324 |



|          |        |       |             |             |             |             |
|----------|--------|-------|-------------|-------------|-------------|-------------|
| MBNL3    | 55796  | 11539 | 13.12506721 | 11.5288251  | 13.22017486 | 5.490964044 |
| EDC4     | 23644  | 4739  | 31.91512225 | 28.82389444 | 29.55935784 | 17.29978677 |
| COCH     | 1690   | 2882  | 52.47944634 | 26.44301811 | 57.47649303 | 7.375097367 |
| EFHD2    | 79180  | 2424  | 62.31079958 | 132.1000693 | 61.4503947  | 150.9865446 |
| MLF2     | 8079   | 1888  | 80.00072997 | 76.83478695 | 80.23896922 | 86.52547267 |
| EEA1     | 8411   | 8019  | 18.83543811 | 13.22713031 | 17.44238833 | 9.895512443 |
| RPL17    | 6139   | 985   | 153.134002  | 139.5814888 | 155.2996622 | 55.28260318 |
| TNFAIP8  | 25816  | 2015  | 74.857068   | 43.12890672 | 87.76443933 | 41.9926872  |
| SUMF2    | 25870  | 2064  | 73.07993799 | 88.42052752 | 71.04245367 | 52.07835573 |
| CTDSPL2  | 51496  | 4875  | 30.94092144 | 26.05428314 | 27.78123734 | 25.78632285 |
| KEAP1    | 9817   | 2606  | 57.80222788 | 71.14228461 | 65.10424535 | 64.78345039 |
| SSBP1    | 6742   | 628   | 239.8608373 | 174.575925  | 255.6949341 | 97.02402508 |
| NDUFV1   | 4723   | 1631  | 92.23066811 | 98.36881239 | 87.31203504 | 43.68789685 |
| ANKRD27  | 84079  | 4461  | 33.72073967 | 14.03631123 | 33.58011563 | 6.625109615 |
| AK4      | 205    | 6998  | 21.46668098 | 13.8195749  | 23.12719737 | 16.71961743 |
| UHRF1    | 29128  | 4086  | 36.76550013 | 24.59558023 | 32.26668896 | 8.02581395  |
| CD46     | 4179   | 3402  | 44.15750544 | 75.98057446 | 58.19336314 | 89.49236034 |
| HSH2D    | 84941  | 2369  | 63.32606473 | 95.56690912 | 51.90702031 | 127.8318189 |
| SEC23IP  | 11196  | 7306  | 20.50575707 | 17.96447458 | 24.52360767 | 18.45300065 |
| GNL2     | 29889  | 2419  | 61.93264207 | 45.32190198 | 59.91787776 | 30.46056474 |
| POLE3    | 54107  | 2422  | 61.85592947 | 50.14195425 | 73.80136586 | 22.4828093  |
| ATP5G3   | 518    | 3305  | 45.26798034 | 48.67933385 | 46.28446815 | 31.05338382 |
| AUP1     | 550    | 1612  | 92.81059244 | 96.21063808 | 103.2831216 | 66.42981917 |
| VARS     | 7407   | 4308  | 34.68112554 | 35.53529583 | 34.38036623 | 14.98950958 |
| CREB3L2  | 64764  | 7455  | 20.04108502 | 60.2888699  | 20.03733418 | 72.87982135 |
| LYPLA1   | 10434  | 2578  | 57.87505922 | 50.65164983 | 55.56674484 | 46.17074143 |
| TRAM1    | 23471  | 3099  | 48.14517673 | 53.20948264 | 57.47436393 | 61.33614144 |
| HOXD13   | 3239   | 2341  | 63.6469528  | 31.79244626 | 37.9969605  | 11.06830178 |
| TMOD3    | 29766  | 4682  | 31.8234764  | 28.22293508 | 30.95714359 | 33.81020308 |
| HELZ     | 9931   | 13847 | 10.76027418 | 11.57049905 | 11.23027258 | 14.89672935 |
| MCCC2    | 64087  | 3696  | 40.2025823  | 38.04313422 | 43.84616125 | 19.60755761 |
| KIAA0090 | 23065  | 4253  | 34.93739576 | 22.21515597 | 34.87465377 | 12.94630866 |
| ERGIC2   | 51290  | 1781  | 83.42995181 | 72.94298439 | 84.22918617 | 73.65182661 |
| COPS3    | 8533   | 1865  | 79.67224888 | 66.79006476 | 93.35047901 | 30.06584184 |
| GIGYF1   | 64599  | 6329  | 23.44515058 | 18.7307613  | 20.39737545 | 14.32898256 |
| KIAA2026 | 158358 | 7204  | 20.59749556 | 17.7239212  | 17.157355   | 16.74730737 |
| KIAA2013 | 90231  | 2832  | 52.32343638 | 36.03720678 | 53.86567715 | 49.74946632 |
| VAT1     | 10493  | 2758  | 53.65322178 | 92.51030603 | 51.78698284 | 42.49684976 |
| MOK      | 5891   | 1954  | 75.72957301 | 11.74604224 | 65.09387223 | 7.666190306 |
| UGP2     | 7360   | 2185  | 67.72338017 | 76.18124279 | 74.26393443 | 71.24384239 |
| GOLGB1   | 2804   | 11185 | 13.22982438 | 16.01765566 | 13.4685771  | 17.98965488 |
| BNIP3L   | 665    | 3505  | 42.16011398 | 40.17981648 | 47.32055283 | 43.77776837 |
| LRR8C    | 84230  | 7207  | 20.50384342 | 3.277405936 | 12.51818969 | 3.48288872  |
| ATP5O    | 539    | 815   | 181.3143552 | 184.8280919 | 185.3602508 | 113.2608117 |
| UHRF2    | 115426 | 3637  | 40.57377325 | 34.12642436 | 33.92639556 | 21.92932967 |
| OSBP     | 5007   | 5083  | 29.03144075 | 28.49522823 | 25.14799934 | 26.28429068 |
| PHF14    | 9678   | 8370  | 17.63044365 | 14.82888953 | 16.30704371 | 9.166133699 |
| CLSTN1   | 22883  | 5209  | 28.32920202 | 23.22867111 | 24.37745087 | 24.40493875 |
| RNF4     | 6047   | 3493  | 42.24643954 | 46.88864108 | 52.14069977 | 51.75178203 |
| RNF216   | 54476  | 5867  | 25.11716843 | 18.68649751 | 22.18363951 | 19.2181484  |
| PRPF38B  | 55119  | 3761  | 39.18171421 | 31.99405737 | 37.58295808 | 18.78427896 |
| CEP55    | 55165  | 2656  | 55.48284155 | 48.49295624 | 51.86659051 | 27.05656866 |
| MSL1     | 339287 | 3834  | 38.38237898 | 29.99000139 | 36.04074959 | 31.3622182  |
| COX5A    | 9377   | 784   | 187.1801896 | 271.4352218 | 184.0656786 | 268.2698834 |
| C12orf51 | 283450 | 15336 | 9.568940314 | 8.006051727 | 8.651984229 | 9.120914469 |
| CHP      | 11261  | 3230  | 45.43321011 | 54.98379249 | 56.77869129 | 42.80461715 |
| PFKL     | 5211   | 3401  | 43.08876286 | 50.71228991 | 43.98400795 | 32.85525797 |
| DENR     | 8562   | 3061  | 47.8748391  | 42.22246232 | 46.86780561 | 28.0398033  |
| VAPA     | 9218   | 6994  | 20.95294288 | 16.28074091 | 24.95299012 | 15.68722387 |
| NSA2     | 10412  | 1104  | 132.5547974 | 139.4722692 | 146.2151791 | 70.77675824 |
| SRP68    | 6730   | 2515  | 58.18707607 | 44.92094281 | 56.62263585 | 32.27593401 |
| B4GALT5  | 9334   | 4743  | 30.81090241 | 138.5011079 | 30.78173521 | 140.1594742 |

|          |        |       |             |             |             |             |
|----------|--------|-------|-------------|-------------|-------------|-------------|
| UBP1     | 7342   | 4162  | 35.06288419 | 31.37432803 | 33.75885783 | 23.83232649 |
| CEP152   | 22995  | 5641  | 25.8698323  | 19.5931593  | 18.05340453 | 8.361270177 |
| ARAP1    | 116985 | 5155  | 28.2691247  | 63.37007097 | 29.96103987 | 103.6687096 |
| AKNA     | 80709  | 7387  | 19.72753998 | 29.65270463 | 21.16565905 | 49.16168677 |
| SGOL2    | 151246 | 4542  | 32.08439846 | 24.43211735 | 28.60857073 | 10.16155455 |
| BBX      | 56987  | 8914  | 16.32521333 | 16.948683   | 15.05113568 | 30.31664035 |
| EEF1D    | 1936   | 2498  | 58.25578529 | 51.91698259 | 52.18682857 | 35.81807743 |
| ELAC2    | 60528  | 3814  | 38.15494275 | 27.16759266 | 36.8391102  | 12.79112637 |
| UBE2A    | 7319   | 2678  | 54.34016118 | 44.68302902 | 48.284643   | 43.69077027 |
| PPP2R2A  | 5520   | 3945  | 36.88794719 | 24.85332859 | 30.90273949 | 38.48457471 |
| EIF2B1   | 1967   | 1886  | 77.15957139 | 49.62339745 | 77.52335889 | 33.80969874 |
| GLYR1    | 84656  | 3747  | 38.83719019 | 37.6442726  | 46.68902653 | 34.95368944 |
| ZNF518A  | 9849   | 8296  | 17.51670269 | 23.58330487 | 18.05700287 | 31.13539406 |
| LMNB2    | 84823  | 4653  | 31.23115527 | 22.077341   | 25.38323267 | 7.830903789 |
| CIZ1     | 25792  | 3032  | 47.92828677 | 41.45040706 | 44.8771063  | 24.10185341 |
| SLC3A2   | 6520   | 2350  | 61.7507146  | 28.63637055 | 58.26064909 | 53.83746355 |
| KDM3A    | 55818  | 4907  | 29.57289165 | 26.24766492 | 34.05874185 | 42.77944383 |
| RB1      | 5925   | 4772  | 30.4095095  | 32.12675757 | 32.45426028 | 44.37145655 |
| TRAF7    | 84231  | 3676  | 39.47610971 | 42.25091982 | 34.02627278 | 23.18350144 |
| TBC1D9B  | 23061  | 5189  | 27.92634287 | 29.11554447 | 26.91447818 | 28.08802878 |
| TRIP13   | 9319   | 2408  | 60.17848552 | 34.97954935 | 59.05093206 | 12.52570622 |
| CERCAM   | 51148  | 2714  | 53.31813079 | 16.58518877 | 43.90737119 | 4.102279831 |
| PPP1R14B | 26472  | 1038  | 139.4079065 | 133.5278708 | 118.2624724 | 47.58443407 |
| NUTF2    | 10204  | 894   | 161.8628713 | 127.8670775 | 149.3646188 | 54.56974941 |
| TMEM109  | 79073  | 2412  | 59.99394982 | 50.16506957 | 54.22274763 | 20.22610115 |
| CDK13    | 8621   | 6985  | 20.7165937  | 25.26606819 | 21.83931248 | 23.79299878 |
| IGF1R    | 3480   | 11242 | 12.83549499 | 11.35768799 | 12.51695882 | 6.788443456 |
| MED14    | 9282   | 6768  | 21.32042474 | 19.06325716 | 20.7601014  | 17.07843983 |
| MBP      | 4155   | 4889  | 29.51454994 | 17.27420485 | 30.42431417 | 16.47917518 |
| MAP3K1   | 4214   | 7522  | 19.15610854 | 7.613400688 | 21.06668054 | 13.50961037 |
| ARRB1    | 408    | 7539  | 19.11291265 | 26.74938051 | 22.33637814 | 21.58811591 |
| ROD1     | 9991   | 7271  | 19.8173908  | 23.90448275 | 23.71178177 | 37.05581304 |
| NUP50    | 10762  | 5225  | 27.57746382 | 27.72081246 | 30.00445798 | 24.13649409 |
| RICTOR   | 253260 | 9535  | 15.09049421 | 15.51766153 | 14.89075612 | 50.06054104 |
| GFPT1    | 2673   | 8642  | 16.64983364 | 11.24219516 | 12.39543786 | 11.07947838 |
| FKBP8    | 23770  | 1787  | 80.51922904 | 81.92561493 | 68.10297848 | 81.44731531 |
| PRKRIR   | 5612   | 3202  | 44.87304064 | 35.28300161 | 49.09302388 | 23.83375432 |
| EEF2K    | 29904  | 7412  | 19.38525042 | 14.34041967 | 15.62116153 | 4.997906357 |
| KPNA6    | 23633  | 7373  | 19.48779006 | 16.65276133 | 20.77600054 | 13.89244604 |
| CPSF2    | 53981  | 5072  | 28.28846411 | 27.72228393 | 26.32728099 | 22.03090149 |
| PIK3CG   | 5294   | 5379  | 26.63593675 | 53.39864857 | 15.7118246  | 47.94466842 |
| NDUFS1   | 4719   | 3473  | 41.25387383 | 31.11829891 | 31.57408326 | 19.05967123 |
| ZMYM2    | 7750   | 10246 | 13.96352895 | 8.525318409 | 14.02241243 | 8.436182362 |
| CGGBP1   | 8545   | 4608  | 31.04824601 | 27.37050772 | 32.7381336  | 25.25967799 |
| CFLAR    | 8837   | 11061 | 12.93466392 | 19.42055041 | 16.02639136 | 26.53664689 |
| SPAG9    | 9043   | 8273  | 17.2936441  | 11.98604433 | 13.45909214 | 10.98640874 |
| ZNF644   | 84146  | 5648  | 25.29495954 | 21.30482467 | 25.47537579 | 19.96332802 |
| STK24    | 8428   | 4624  | 30.89661148 | 37.63674887 | 35.22935792 | 66.71747127 |
| CDC42EP3 | 10602  | 3981  | 35.83560545 | 3.190520731 | 32.90543885 | 7.067975873 |
| ASXL1    | 171023 | 7056  | 20.21847297 | 17.62197252 | 17.45734352 | 9.352580686 |
| GLO1     | 2739   | 2071  | 68.88534297 | 44.54501762 | 53.56084004 | 27.95492748 |
| TOR1AIP2 | 163590 | 8331  | 17.099647   | 12.99924196 | 15.62254387 | 17.59194536 |
| GFI1     | 2672   | 2802  | 50.84124166 | 43.34183197 | 43.65948495 | 15.17132806 |
| CD320    | 51293  | 1283  | 110.8751153 | 67.04085449 | 101.4430343 | 21.61555279 |
| ARPC5    | 10092  | 2000  | 71.12638648 | 110.5250116 | 74.9004479  | 122.671891  |
| SH3BGRL  | 6451   | 2090  | 67.96573531 | 140.843051  | 60.75700554 | 106.5415068 |
| ATP2A3   | 489    | 4857  | 29.24611628 | 54.59561352 | 36.1058991  | 54.76457194 |
| LMBR1    | 64327  | 4909  | 28.93631835 | 29.36906641 | 31.33332782 | 21.89646083 |
| AURKA    | 6790   | 2554  | 55.61800579 | 42.66451951 | 47.81620676 | 20.68673971 |
| NLN      | 57486  | 8672  | 16.35654989 | 7.348956162 | 12.62056116 | 2.007481805 |
| SENP6    | 26054  | 6645  | 21.34597451 | 23.84259426 | 19.52277554 | 17.91244115 |
| N4BP2L2  | 10443  | 2860  | 49.59580441 | 58.59097165 | 48.3886429  | 76.93712379 |

|          |        |      |             |             |             |             |
|----------|--------|------|-------------|-------------|-------------|-------------|
| SART3    | 9733   | 4377 | 32.40667138 | 25.14949652 | 31.13517731 | 22.66167303 |
| MX2      | 4600   | 2961 | 47.90408667 | 52.75437758 | 43.88386634 | 242.4224073 |
| AKAP11   | 11215  | 9926 | 14.29014715 | 14.41251094 | 12.49487759 | 10.01335601 |
| MYL12A   | 10627  | 1243 | 114.1142402 | 110.7888972 | 114.2263553 | 271.6422714 |
| FLOT2    | 2319   | 2659 | 53.26800092 | 41.23116995 | 52.68213493 | 45.60168819 |
| PAFAH1B1 | 5048   | 5614 | 25.22971401 | 20.24308322 | 27.36088734 | 25.85349033 |
| RAB5C    | 5878   | 1791 | 79.08409517 | 117.3261986 | 93.07854646 | 145.5769824 |
| TBC1D5   | 9779   | 7869 | 17.99969684 | 21.6347911  | 13.85473845 | 12.03923089 |
| ASCC3    | 10973  | 7598 | 18.61479709 | 16.65819491 | 18.40885918 | 9.671186793 |
| GATAD2B  | 57459  | 7480 | 18.90845298 | 14.80586154 | 18.89699269 | 17.48249271 |
| CNOT8    | 9337   | 2550 | 55.46479541 | 55.6644785  | 59.49116026 | 69.85780369 |
| SLC39A8  | 64116  | 4098 | 34.46335825 | 24.52355803 | 37.07021557 | 11.41070457 |
| NPLOC4   | 55666  | 4401 | 32.09062534 | 28.20218255 | 34.32597236 | 32.97920808 |
| RBL2     | 5934   | 4903 | 28.80498514 | 27.2689396  | 28.0535141  | 20.10664007 |
| MPHOSPH  | 54737  | 4281 | 32.99015233 | 35.86351782 | 31.38918669 | 27.23639922 |
| MTMR4    | 9110   | 5847 | 24.11945544 | 10.63285771 | 20.66955422 | 11.14795517 |
| GLRX3    | 10539  | 1365 | 103.3160849 | 39.83236269 | 106.4937112 | 32.77419686 |
| ATP11B   | 23200  | 7368 | 19.14039847 | 27.49116591 | 20.56069135 | 32.55675931 |
| KLHDC5   | 57542  | 6477 | 21.74186657 | 30.61928199 | 21.20350392 | 18.31454588 |
| NUP214   | 8021   | 6614 | 21.29151342 | 18.96806796 | 21.72265463 | 14.293057   |
| DYNLL1   | 8655   | 820  | 171.7342314 | 152.450166  | 200.7205233 | 108.6203655 |
| DNAJC13  | 23317  | 7551 | 18.62239221 | 21.89668283 | 16.42486491 | 39.86382191 |
| RAB14    | 51552  | 4379 | 32.06515128 | 38.31765508 | 32.27894619 | 47.01305175 |
| PRKCD    | 5580   | 2850 | 49.19610922 | 84.12911185 | 53.15479786 | 101.9247082 |
| IPO8     | 10526  | 5365 | 26.13400024 | 22.88551897 | 27.17362262 | 15.50759789 |
| ERBB2IP  | 55914  | 6916 | 20.27312193 | 18.26867152 | 23.27920592 | 32.95761997 |
| C6orf106 | 64771  | 4430 | 31.64986711 | 27.06184749 | 27.51948246 | 38.84075249 |
| HTATSF1  | 27336  | 3037 | 46.09961314 | 35.80584463 | 49.67313784 | 15.53043302 |
| ANXA6    | 309    | 3002 | 46.63708365 | 40.60275768 | 42.08803707 | 51.78726407 |
| RBM10    | 8241   | 3443 | 40.66352748 | 36.63180353 | 40.56323766 | 24.22326214 |
| NCAPH    | 23397  | 4495 | 31.14672416 | 23.29952432 | 31.25792354 | 11.70889975 |
| CCNK     | 8812   | 2618 | 53.39959471 | 43.40896456 | 53.02295195 | 56.4450229  |
| CDCA7L   | 55536  | 2976 | 46.97585314 | 37.13878079 | 39.33190786 | 7.414229188 |
| DCAF16   | 54876  | 4548 | 30.73881683 | 21.11716955 | 25.73697401 | 9.391488585 |
| RAF1     | 5894   | 3291 | 42.47953174 | 44.01131725 | 36.65864441 | 77.07182172 |
| CAMKK2   | 10645  | 5620 | 24.83910192 | 30.41150697 | 26.65496367 | 17.82958846 |
| TSPAN3   | 10099  | 3871 | 36.0091363  | 34.07826127 | 36.84247324 | 22.12022966 |
| RALBP1   | 10928  | 4368 | 31.8651512  | 25.09928592 | 29.16774522 | 15.01532775 |
| TMEM131  | 23505  | 6657 | 20.90836419 | 24.87076532 | 23.29623176 | 49.23123466 |
| SEPHS2   | 22928  | 2291 | 60.75381075 | 66.13977548 | 71.75012848 | 89.24188197 |
| ILK      | 3611   | 1931 | 72.08025916 | 98.89570731 | 74.95083456 | 66.14842699 |
| THOC4    | 10189  | 1113 | 124.8720524 | 100.5049486 | 123.3918193 | 46.37858046 |
| CCNF     | 899    | 4287 | 32.41954613 | 18.60837442 | 23.50894126 | 5.430212092 |
| MRPL42   | 28977  | 3244 | 42.84296987 | 31.66642037 | 42.20484752 | 26.58282849 |
| PRKAA1   | 5562   | 5130 | 27.09212364 | 27.71291479 | 25.82369306 | 25.37266255 |
| CHAMP1   | 283489 | 3831 | 36.27841145 | 32.34011295 | 38.82653928 | 20.02624356 |
| NOL8     | 55035  | 4440 | 31.25635318 | 25.99714655 | 34.02446044 | 17.64413738 |
| POM121C  | 1E+08  | 5863 | 23.67017024 | 25.54043393 | 23.42403119 | 22.58033027 |
| SMAP2    | 64744  | 2946 | 47.03795721 | 39.63486993 | 55.08034512 | 49.26730982 |
| OAS3     | 4940   | 6646 | 20.85071049 | 29.27067917 | 9.632753941 | 412.1069088 |
| TECR     | 9524   | 1245 | 111.3042746 | 124.571525  | 116.2490454 | 57.07030594 |
| CYB5B    | 80777  | 4286 | 32.28404941 | 28.69893653 | 32.88075964 | 21.20638345 |
| RAB11A   | 8766   | 4943 | 27.99300744 | 25.01965204 | 28.72412697 | 21.74584791 |
| CASP2    | 835    | 4242 | 32.61891461 | 34.03950488 | 31.57815622 | 18.46769683 |
| PURB     | 5814   | 9074 | 15.2264767  | 12.45053683 | 15.18158083 | 12.40361999 |
| SKA3     | 221150 | 2927 | 47.2036384  | 27.55908161 | 41.65060038 | 8.852372552 |
| IDH3A    | 3419   | 2701 | 51.07762437 | 57.99754808 | 54.13145311 | 51.03815464 |
| GRPEL1   | 80273  | 1519 | 90.82334656 | 92.85917672 | 98.33991197 | 61.83475471 |
| AIM1     | 202    | 7553 | 18.26567767 | 5.251452123 | 13.06368113 | 4.770599445 |
| PIP4K2B  | 8396   | 5732 | 24.06850374 | 17.76596946 | 21.15796459 | 9.111417767 |
| FAM20B   | 9917   | 5950 | 23.15231551 | 17.86406565 | 18.96236346 | 7.824981257 |
| EBNA1BP2 | 10969  | 1514 | 90.9882941  | 52.54377044 | 97.12958646 | 17.2479018  |

|          |          |       |             |             |             |             |
|----------|----------|-------|-------------|-------------|-------------|-------------|
| SNX5     | 27131    | 2154  | 63.85881666 | 73.24305515 | 68.27028501 | 41.91423996 |
| CRTAP    | 10491    | 6668  | 20.62865793 | 14.63717995 | 18.06123485 | 4.918037762 |
| GTF2F1   | 2962     | 2551  | 53.84065266 | 58.3505423  | 58.14265091 | 61.81579155 |
| SQLE     | 6713     | 2989  | 45.9509886  | 45.99791452 | 42.76590185 | 35.28452245 |
| ATXN2    | 6311     | 4712  | 29.14845181 | 22.03735804 | 25.78283909 | 15.25090118 |
| RPS26    | 6231     | 699   | 196.4914234 | 151.4242135 | 216.1210363 | 82.24577551 |
| ZNF592   | 9640     | 8191  | 16.76809973 | 17.3565197  | 15.68320534 | 13.66660496 |
| FDPS     | 2224     | 1555  | 88.32636973 | 121.3757453 | 70.79058564 | 53.24334723 |
| CDC42SE2 | 56990    | 3667  | 37.39926882 | 39.98470318 | 35.31975967 | 40.29808289 |
| DNAJC10  | 54431    | 4193  | 32.70763624 | 31.03608106 | 31.54406406 | 16.84895616 |
| NR2C2    | 7182     | 8330  | 16.46375975 | 15.56886225 | 14.35620347 | 10.47381032 |
| KLHL5    | 51088    | 7728  | 17.74626278 | 20.47246457 | 16.13069477 | 22.97232309 |
| TFAM     | 7019     | 1936  | 70.73281642 | 53.98167828 | 69.08225927 | 29.27690167 |
| PTPN12   | 5782     | 3240  | 42.20195877 | 42.02184271 | 40.62666862 | 77.16038449 |
| DAP3     | 7818     | 2161  | 63.2736448  | 57.22912542 | 69.41794566 | 41.12275374 |
| C7orf42  | 55069    | 4238  | 32.26388542 | 38.33058688 | 36.89257277 | 40.55264385 |
| PARP8    | 79668    | 7201  | 18.95986117 | 14.91533871 | 16.02020271 | 23.33230888 |
| HN1      | 51155    | 1696  | 80.50115581 | 71.60602192 | 74.24865435 | 42.01353759 |
| PSME1    | 5720     | 1187  | 115.021028  | 226.9626924 | 105.9093791 | 200.5529426 |
| SMG5     | 23381    | 4577  | 29.78491896 | 28.28616776 | 31.2980267  | 31.00341554 |
| PDHA1    | 5160     | 3504  | 38.90570037 | 40.38206473 | 40.76155784 | 23.05054689 |
| SH2B3    | 10019    | 5425  | 25.12913808 | 37.50161128 | 28.04147985 | 61.30702707 |
| DNAJC3   | 5611     | 5598  | 24.31603928 | 38.05431344 | 29.70366331 | 44.29713418 |
| MIB1     | 57534    | 9308  | 14.624107   | 8.809886977 | 11.80361795 | 4.023349769 |
| SEC11A   | 23478    | 1399  | 97.29891917 | 138.892138  | 107.0771235 | 77.26734297 |
| SEL1L    | 6400     | 6593  | 20.61531954 | 21.36057284 | 22.88143783 | 19.58889952 |
| HIPK2    | 28996    | 15245 | 8.915500279 | 27.08487798 | 7.844353882 | 40.19364829 |
| GYS1     | 2997     | 3635  | 37.39114216 | 42.11445789 | 31.96880846 | 29.57076375 |
| ATP2C1   | 27032    | 5051  | 26.90888968 | 23.42588707 | 27.73347788 | 15.26933217 |
| GRWD1    | 83743    | 2456  | 55.2574982  | 49.99218619 | 54.54175029 | 22.5012539  |
| RB1CC1   | 9821     | 6670  | 20.34668899 | 12.36103349 | 18.91109483 | 9.681380402 |
| FAM208B  | 54906    | 8636  | 15.71473085 | 10.7597533  | 12.20832514 | 8.883804893 |
| MRPS16   | 51021    | 2651  | 51.11581645 | 49.42497874 | 52.12381514 | 21.83879849 |
| FERMT3   | 83706    | 2570  | 52.72685969 | 155.2025314 | 56.56183495 | 229.6819317 |
| LITAF    | 9516     | 2642  | 51.289943   | 74.64304542 | 52.22140392 | 79.37785845 |
| TIMELESS | 8914     | 5154  | 26.25216206 | 23.82243098 | 27.13824447 | 12.01847731 |
| ZFC3H1   | 196441   | 7158  | 18.90243689 | 17.05955731 | 17.76940854 | 16.17620978 |
| MED12    | 9968     | 6985  | 19.37060032 | 20.4170248  | 17.69528782 | 16.40296871 |
| MZT1     | 440145   | 2412  | 56.01130061 | 34.0900749  | 41.43353736 | 17.54047776 |
| CENPJ    | 55835    | 5187  | 26.04574071 | 19.2889677  | 24.4401112  | 8.936998191 |
| ZFP36L2  | 678      | 3702  | 36.4383768  | 56.52077012 | 45.88680393 | 19.73982159 |
| LOC10050 | 1.01E+08 | 3335  | 40.38695195 | 34.20999538 | 39.3426797  | 19.84834728 |
| KIF20A   | 10112    | 3471  | 38.8045188  | 29.53126908 | 29.03567593 | 7.290005148 |
| ZNF655   | 79027    | 4863  | 27.6969946  | 37.75737862 | 32.58555851 | 45.53920956 |
| SNRPD3   | 6634     | 1385  | 97.10187623 | 85.91527339 | 91.98896108 | 46.0397775  |
| PSMF1    | 9491     | 3695  | 36.39677905 | 32.86706717 | 41.05614578 | 24.54347242 |
| DNAJC7   | 7266     | 2096  | 64.16321497 | 54.43241154 | 67.4377411  | 63.16244102 |
| TBCA     | 6902     | 679   | 198.0649464 | 117.1594528 | 178.3006896 | 99.27659995 |
| RAPGEF1  | 2889     | 6204  | 21.6443766  | 37.21061596 | 22.44304606 | 67.63943148 |
| CCDC88C  | 440193   | 7523  | 17.84948988 | 14.06958996 | 16.65450797 | 13.10419464 |
| MRE11A   | 4361     | 5164  | 25.96385094 | 20.45365851 | 24.99902967 | 9.721603023 |
| UBE2L3   | 7332     | 3016  | 44.4553469  | 40.63593389 | 45.2552904  | 38.25744426 |
| ZNF22    | 7570     | 2204  | 60.83363259 | 37.91390961 | 57.23094489 | 17.54261017 |
| IDE      | 3416     | 5896  | 22.74038776 | 20.93780654 | 28.63238201 | 14.488633   |
| KLF13    | 51621    | 6817  | 19.66808365 | 18.69741758 | 26.59268377 | 26.33921101 |
| CTCF     | 10664    | 3946  | 33.97803503 | 31.96231616 | 33.62565386 | 23.9569891  |
| ASH1L    | 55870    | 11784 | 11.36056857 | 11.27022065 | 9.377285318 | 12.35118402 |
| MAPK1    | 5594     | 5916  | 22.62896215 | 21.16835173 | 22.07132903 | 19.50379511 |
| PRDX2    | 7001     | 1039  | 128.847873  | 98.44100317 | 142.9578318 | 43.25236533 |
| COASY    | 80347    | 2553  | 52.35744375 | 34.30209366 | 45.18663521 | 22.67710725 |
| ERH      | 2079     | 801   | 166.877096  | 134.3672743 | 177.5214037 | 106.6479153 |
| PLDN     | 26258    | 3959  | 33.76321139 | 30.39395043 | 33.67534337 | 22.39551452 |

|          |        |       |             |             |             |             |
|----------|--------|-------|-------------|-------------|-------------|-------------|
| SAR1A    | 56681  | 3088  | 43.22026157 | 46.25510069 | 48.92118017 | 42.80636254 |
| SSFA2    | 6744   | 5308  | 25.14396528 | 25.10436049 | 20.41994774 | 23.41584813 |
| DDX41    | 51428  | 2118  | 63.0142435  | 47.55447285 | 60.85160738 | 25.0407753  |
| DHX30    | 22907  | 4133  | 32.29232222 | 23.88455827 | 30.51947799 | 12.19569003 |
| ZBTB44   | 29068  | 9351  | 14.27271604 | 9.365120854 | 13.85066396 | 6.970601419 |
| USP32    | 84669  | 7026  | 18.99575402 | 11.22726593 | 15.30656754 | 14.78024576 |
| CHERP    | 10523  | 4105  | 32.51258654 | 25.0245719  | 32.52910333 | 16.96358803 |
| FBRS1    | 57666  | 4563  | 29.20442287 | 16.99447168 | 23.24456502 | 5.900293398 |
| TSN      | 7247   | 3408  | 39.04207611 | 31.25411482 | 40.66983669 | 13.83976675 |
| EHMT2    | 10919  | 3982  | 33.41421281 | 23.55915627 | 25.99938048 | 12.86150234 |
| WDR3     | 10885  | 3877  | 34.26644551 | 20.46129372 | 32.80717729 | 6.68323303  |
| YY1      | 7528   | 2592  | 51.25424739 | 43.75842459 | 48.3379103  | 36.54965581 |
| VCL      | 7414   | 5647  | 23.48975085 | 38.71061869 | 26.71459529 | 31.36625732 |
| SLC35F2  | 54733  | 3184  | 41.66037156 | 17.00638894 | 38.42144373 | 5.976228994 |
| POFUT1   | 23509  | 5249  | 25.27083693 | 18.38189226 | 23.38663485 | 11.76239345 |
| OCIAD1   | 54940  | 2068  | 64.14246763 | 71.97883627 | 58.13395997 | 69.89081632 |
| PRTN3    | 5657   | 1001  | 132.514109  | 1432.941051 | 161.2602974 | 191.9130779 |
| RHEB     | 6009   | 2092  | 63.30890865 | 39.94371739 | 56.15407616 | 45.18846989 |
| FOXK1    | 221937 | 11191 | 11.83470976 | 9.836417323 | 9.383301438 | 5.498916481 |
| SMARCD2  | 6603   | 2770  | 47.73929629 | 62.1839947  | 42.7146088  | 39.9011405  |
| CPSF3    | 51692  | 2286  | 57.84682884 | 51.85782515 | 63.40391351 | 30.90449395 |
| CMTM6    | 54918  | 3384  | 39.07737906 | 75.19944621 | 43.01867629 | 100.0180434 |
| MGAT4A   | 11320  | 8382  | 15.75202393 | 16.61541732 | 15.37624725 | 13.16198166 |
| ADD3     | 120    | 4454  | 29.64379537 | 76.09531062 | 36.76373823 | 148.5720595 |
| ENSA     | 2029   | 2931  | 44.97750883 | 49.18892768 | 49.81158994 | 41.02447786 |
| DIS3L    | 115752 | 3795  | 34.68371336 | 30.59178623 | 33.57172888 | 11.84168843 |
| TXLNA    | 200081 | 4843  | 27.17833827 | 26.36447003 | 26.78687662 | 24.49376702 |
| UBE2I    | 7329   | 1478  | 88.91766309 | 76.89084521 | 90.91820584 | 51.6344258  |
| POMP     | 51371  | 1477  | 88.83948536 | 70.45556112 | 87.54656327 | 94.84141717 |
| FOXK2    | 3607   | 5262  | 24.89766889 | 16.85431557 | 22.92732777 | 14.88786962 |
| UBE2E1   | 7324   | 1845  | 71.00896136 | 81.04104686 | 76.72671551 | 94.46680271 |
| RAP2A    | 5911   | 4358  | 30.01540788 | 6.698274828 | 24.19254151 | 3.623095757 |
| IFITM2   | 10581  | 738   | 177.2454574 | 203.2064998 | 156.6026619 | 638.8303819 |
| OSBPL5   | 114879 | 3904  | 33.50592919 | 13.58457453 | 32.30968303 | 5.49627548  |
| EIF4E    | 1977   | 4842  | 27.01510689 | 17.30381856 | 31.67962345 | 11.66411664 |
| DNTTIP2  | 30836  | 2725  | 48.00262295 | 35.5714561  | 51.09602119 | 32.16576061 |
| PCNT     | 5116   | 10573 | 12.35247909 | 8.577783287 | 11.09080134 | 3.924895196 |
| ALAS1    | 211    | 2407  | 54.17464695 | 440.9439458 | 73.03237285 | 437.4044521 |
| ERGIC1   | 57222  | 2949  | 44.21782815 | 18.43715669 | 36.61122857 | 10.29648336 |
| C9orf86  | 55684  | 3151  | 41.38317208 | 45.96675502 | 56.99525457 | 38.54564195 |
| STK38L   | 23012  | 5110  | 25.51827304 | 44.43571541 | 34.77308891 | 102.0463309 |
| CDC123   | 8872   | 1566  | 83.26843883 | 64.88614575 | 83.11073627 | 43.1744829  |
| GOLGA3   | 2802   | 9252  | 14.09407428 | 11.87381254 | 14.18156472 | 10.19583335 |
| RFX7     | 64864  | 7203  | 18.10334239 | 19.36599481 | 15.8397572  | 13.54584367 |
| PDPR     | 55066  | 7999  | 16.27628317 | 11.72803604 | 13.89370977 | 9.287585036 |
| SNRPC    | 6631   | 1231  | 105.7627856 | 80.00978607 | 100.7507351 | 44.23506429 |
| DUSP6    | 1848   | 2842  | 45.73877652 | 159.7934594 | 95.97770124 | 378.0049176 |
| STAT5B   | 6777   | 5171  | 25.13819433 | 20.98617627 | 26.10925595 | 14.56266429 |
| BAG1     | 573    | 3885  | 33.45935724 | 36.42181591 | 38.12371112 | 60.38997482 |
| ANKRD13A | 88455  | 3917  | 33.13383117 | 44.20244985 | 39.96987699 | 80.25836716 |
| COX7B    | 1349   | 456   | 284.6167033 | 312.2589595 | 293.2966095 | 258.807077  |
| KIAA1143 | 57456  | 5157  | 25.12717288 | 19.83327561 | 22.0830883  | 9.342266702 |
| SLC2A3   | 6515   | 3938  | 32.90523884 | 43.79697765 | 50.32633473 | 107.8455446 |
| SRGAP2   | 23380  | 6306  | 20.5488155  | 15.90147608 | 18.36093391 | 37.91127294 |
| CHD6     | 84181  | 10389 | 12.47288772 | 8.064788667 | 10.41272479 | 13.63944596 |
| RBM12    | 10137  | 6724  | 19.27139062 | 17.82926597 | 19.7018955  | 12.88512096 |
| PAN3     | 255967 | 5643  | 22.92689073 | 24.71969886 | 18.98305405 | 26.00760688 |
| SNRPF    | 6636   | 806   | 160.5166804 | 115.0104179 | 173.5366154 | 46.46320055 |
| GORASP2  | 26003  | 3191  | 40.48011852 | 38.89620978 | 40.38975382 | 29.94247048 |
| CLASP1   | 23332  | 8118  | 15.88663119 | 12.98347621 | 13.84620511 | 12.01905789 |
| QRICH1   | 54870  | 3331  | 38.71740379 | 34.25107613 | 38.05789757 | 32.14796413 |
| ANXA2    | 302    | 1665  | 77.45806128 | 7.360839436 | 86.54426862 | 22.37051699 |

|           |        |       |             |             |             |             |
|-----------|--------|-------|-------------|-------------|-------------|-------------|
| PKD1P1    | 339044 | 6295  | 20.48731883 | 14.90271013 | 18.96360447 | 6.720831193 |
| VPS26B    | 112936 | 3685  | 34.99801141 | 35.73788784 | 34.22985143 | 16.91942735 |
| EPB41L2   | 2037   | 4457  | 28.89012472 | 48.14625879 | 23.74998103 | 35.42618647 |
| NCOA6     | 23054  | 7062  | 18.23326053 | 14.79871554 | 17.53226709 | 13.61564853 |
| PM20D2    | 135293 | 4708  | 27.3498908  | 21.29879102 | 25.08669958 | 6.621504863 |
| FGFRL1    | 53834  | 3215  | 40.05078876 | 7.762756047 | 31.34769243 | 10.38903962 |
| CD93      | 22918  | 6701  | 19.21553289 | 62.25082612 | 21.28297477 | 95.12736747 |
| GNL3L     | 54552  | 8690  | 14.79388949 | 21.7191351  | 16.31439297 | 8.595655976 |
| DOPEY2    | 9980   | 7689  | 16.71984649 | 21.93839802 | 15.60797821 | 12.76863032 |
| CYFIP1    | 23191  | 4446  | 28.91563196 | 18.84504936 | 21.43261974 | 14.70637039 |
| JAK1      | 3716   | 5053  | 25.44209375 | 26.45945198 | 27.42980476 | 36.17519558 |
| SP100     | 6672   | 5455  | 23.52970001 | 29.28891567 | 18.39784815 | 115.8909879 |
| DGKD      | 8527   | 6294  | 20.39315436 | 7.222413042 | 15.57612477 | 3.762976957 |
| NFE2L2    | 4780   | 2884  | 44.43485692 | 40.87326291 | 44.32291284 | 63.66261397 |
| SLC36A4   | 120103 | 2493  | 51.4039821  | 51.48480803 | 51.359232   | 18.26975297 |
| ASXL2     | 55252  | 7174  | 17.86313456 | 17.02150979 | 15.75653015 | 14.30602642 |
| ACAP2     | 23527  | 7187  | 17.83082334 | 23.56377354 | 19.63798812 | 31.7712199  |
| ROCK1     | 6093   | 6650  | 19.27069584 | 20.6748521  | 20.87429898 | 22.70856117 |
| C14orf166 | 51637  | 1064  | 120.2497568 | 116.2332143 | 137.4145252 | 76.86208706 |
| RET       | 5979   | 5629  | 22.69343667 | 13.45942669 | 23.57200749 | 5.610037772 |
| MDH1      | 4190   | 1665  | 76.72153455 | 65.17688737 | 76.2655505  | 46.32155963 |
| POLR1A    | 25885  | 6637  | 19.24685174 | 15.17558739 | 17.66807934 | 5.459509789 |
| PDK1      | 5163   | 4576  | 27.91550591 | 18.26098269 | 28.95007547 | 12.82875224 |
| NEMF      | 9147   | 4121  | 30.99765956 | 29.9561532  | 31.58248313 | 27.50792605 |
| PPIP5K2   | 23262  | 5293  | 24.13401758 | 26.56478822 | 23.27206043 | 17.43955441 |
| DIDO1     | 11083  | 8592  | 14.86747614 | 16.15744444 | 16.25456556 | 13.0994469  |
| ADIPOR1   | 51094  | 2151  | 59.38696189 | 56.14844962 | 61.09675573 | 70.67600004 |
| TGFB1     | 7040   | 2217  | 57.52682402 | 93.37463425 | 66.33026338 | 268.9007674 |
| UCK2      | 7371   | 4940  | 25.81720017 | 15.87795648 | 23.09590509 | 4.138727765 |
| FLI1      | 2313   | 4049  | 31.49838697 | 49.75074018 | 35.58809762 | 59.79375651 |
| ARL6IP4   | 51329  | 1402  | 90.82209892 | 110.6216466 | 96.44953443 | 86.48708196 |
| TPD52     | 7163   | 4250  | 29.96060769 | 18.24606454 | 20.08448084 | 7.144548104 |
| ACADVL    | 37     | 2320  | 54.88473392 | 68.38658256 | 48.17656843 | 56.62772934 |
| AAK1      | 22848  | 21283 | 5.982830554 | 4.271753765 | 4.98355261  | 8.037043142 |
| TAF9      | 6880   | 1482  | 85.91942152 | 58.6401802  | 98.08631297 | 35.10406058 |
| NOL11     | 25926  | 2454  | 51.80448106 | 39.77209288 | 54.58620159 | 18.64259292 |
| AATF      | 26574  | 2172  | 58.53047722 | 61.14561699 | 52.62663715 | 37.09331835 |
| TMEM167   | 153339 | 4608  | 27.58858431 | 23.59860029 | 32.18791286 | 21.65742826 |
| NOC2L     | 26155  | 2817  | 45.12893025 | 34.25152733 | 47.02717266 | 15.09054356 |
| XBP1      | 7494   | 1820  | 69.85065743 | 45.17871465 | 59.67053151 | 21.68880675 |
| LOC100190 | 1E+08  | 2453  | 51.74227899 | 42.24101036 | 51.07699286 | 35.98001804 |
| CAPNS1    | 826    | 1492  | 85.06957799 | 86.77331758 | 94.03021551 | 43.00934957 |
| DDX56     | 54606  | 2499  | 50.78984008 | 46.18940804 | 58.76066793 | 25.84025902 |
| NPEPPS    | 9520   | 4364  | 29.08428285 | 35.02823596 | 34.47175758 | 30.01179522 |
| HIF1A     | 3091   | 4082  | 31.09353512 | 49.02100708 | 29.65854195 | 57.5746962  |
| GEMIN5    | 25929  | 5404  | 23.44919026 | 9.319057504 | 21.15193484 | 4.420171323 |
| TH1L      | 51497  | 2263  | 55.99621042 | 47.55995878 | 60.68718289 | 28.89285141 |
| SLC29A2   | 3177   | 2529  | 50.02571689 | 39.47372193 | 36.42552628 | 9.605165502 |
| DNAJA2    | 10294  | 3066  | 41.26387411 | 36.04860132 | 41.00275049 | 32.35164476 |
| SDF4      | 51150  | 2167  | 58.38257407 | 58.61311966 | 59.37813552 | 46.33350993 |
| SKP2      | 6502   | 1600  | 78.94415741 | 58.49357974 | 64.30979924 | 18.85118786 |
| MTCH2     | 23788  | 2628  | 48.06341395 | 39.08899074 | 52.41920259 | 17.33123827 |
| C5orf51   | 285636 | 5250  | 24.05917178 | 20.16105243 | 19.11624031 | 20.0500969  |
| ESPL1     | 9700   | 6641  | 19.0198241  | 17.01192157 | 15.58944934 | 7.010787303 |
| RPS21     | 6227   | 418   | 302.1785929 | 281.4728649 | 291.6538452 | 150.6109483 |
| SCAP      | 22937  | 4255  | 29.68522958 | 24.09001997 | 28.0057827  | 20.93271438 |
| CASP8AP2  | 9994   | 6821  | 18.4579797  | 14.50486908 | 18.33757202 | 10.41673228 |
| MKRN1     | 23608  | 3158  | 39.86759959 | 45.79430412 | 40.3434804  | 62.30552717 |
| PTEN      | 5728   | 5572  | 22.59545576 | 39.83154236 | 21.00713528 | 64.63046432 |
| CHORDC1   | 26973  | 3400  | 36.96985098 | 20.2515587  | 39.39839374 | 14.34863411 |
| PSMC3     | 5702   | 1618  | 77.6869551  | 69.68685938 | 85.53245902 | 45.54023864 |
| PPP1R9B   | 84687  | 4071  | 30.87631868 | 46.30716072 | 32.02227899 | 43.3101301  |



|          |        |       |             |             |             |             |
|----------|--------|-------|-------------|-------------|-------------|-------------|
| OXSRI    | 9943   | 4525  | 27.77845157 | 19.35320334 | 25.3074786  | 17.98373545 |
| SLC25A23 | 79085  | 3475  | 36.11312437 | 28.53540855 | 39.3384865  | 28.31091436 |
| ARHGAP19 | 84986  | 5495  | 22.83769011 | 21.33029885 | 17.30266472 | 10.57271768 |
| RNH1     | 6050   | 2057  | 61.00783042 | 38.02346735 | 48.27605145 | 16.13919957 |
| CDC5L    | 988    | 3012  | 41.66437821 | 42.16953197 | 43.21096049 | 38.2410435  |
| AES      | 166    | 1754  | 71.54681139 | 73.68469621 | 75.52767695 | 108.2544318 |
| MCM5     | 4174   | 2568  | 48.78844276 | 53.19175847 | 39.57475476 | 25.7765725  |
| TTF2     | 8458   | 4860  | 25.77957222 | 18.84449248 | 20.25899152 | 8.746926177 |
| LRP8     | 7804   | 4528  | 27.66977054 | 19.19274449 | 19.64462998 | 4.247071992 |
| CBFB     | 865    | 3181  | 39.38658315 | 38.24792388 | 43.97061051 | 33.40935336 |
| PNPT1    | 87178  | 4579  | 27.36159009 | 14.55055094 | 25.33202315 | 75.19796809 |
| MAP7D1   | 55700  | 3357  | 37.26074913 | 26.88329977 | 38.32958584 | 36.6627193  |
| AP1B1    | 162    | 4194  | 29.82459104 | 30.49736792 | 27.35518012 | 23.16782409 |
| KDELC2   | 143888 | 4311  | 29.01515538 | 28.17068271 | 26.51474273 | 14.50951488 |
| UBE2M    | 9040   | 1540  | 81.09087576 | 63.37708826 | 70.79411485 | 45.87511245 |
| PLAGL2   | 5326   | 5656  | 22.07919885 | 34.27589033 | 22.3388061  | 35.07430794 |
| PAIP1    | 10605  | 2796  | 44.59068759 | 39.29059856 | 45.03781036 | 34.96893448 |
| NELF     | 26012  | 3652  | 34.13898207 | 15.925337   | 26.55523151 | 11.41849556 |
| POLG     | 5428   | 4464  | 27.92911346 | 24.35984546 | 24.94333988 | 15.10054018 |
| GOPC     | 57120  | 4640  | 26.82568456 | 17.96108278 | 26.5472017  | 13.3498345  |
| CTDSP1   | 58190  | 2655  | 46.881799   | 47.83978542 | 45.44015018 | 44.22174784 |
| BAP1     | 8314   | 3599  | 34.58493369 | 29.28587382 | 34.75425916 | 21.1484447  |
| NARG2    | 79664  | 7209  | 17.26608078 | 15.57881441 | 16.26620094 | 9.94032702  |
| PSMA2    | 5683   | 1466  | 84.76588688 | 91.35228072 | 93.53602328 | 107.8423888 |
| SMARCD1  | 6602   | 3431  | 36.21882547 | 21.49741144 | 42.49096046 | 20.64998602 |
| HPRT1    | 3251   | 1435  | 86.59706632 | 53.7282989  | 70.52641163 | 20.45448441 |
| MRPL12   | 6182   | 1032  | 120.4135564 | 96.94949171 | 118.7453116 | 38.6419438  |
| XAB2     | 56949  | 2682  | 46.33362795 | 33.15072379 | 42.22544075 | 31.92669986 |
| AP3B1    | 8546   | 4009  | 30.94597256 | 31.29329047 | 30.83102654 | 25.95371304 |
| HDAC1    | 3065   | 2091  | 59.33161358 | 81.09788287 | 74.77318193 | 48.21117826 |
| ANTXR2   | 118429 | 8058  | 15.39617821 | 16.06673987 | 21.65813017 | 31.57769679 |
| SATB1    | 6304   | 5652  | 21.95017764 | 12.30074268 | 16.22391834 | 17.97935053 |
| RBM5     | 10181  | 3151  | 39.30752708 | 39.67284549 | 39.02498607 | 40.85838046 |
| M6PR     | 4074   | 2583  | 47.95122642 | 90.92746795 | 66.09294897 | 136.7550778 |
| GRN      | 2896   | 2323  | 53.31813079 | 165.757589  | 49.11483906 | 343.6846472 |
| GAL      | 51083  | 778   | 159.2005371 | 56.71063185 | 167.5613082 | 20.03473322 |
| PAPD7    | 11044  | 3871  | 31.99638797 | 23.54393388 | 29.47397859 | 32.21291128 |
| LOC72908 | 729082 | 1894  | 65.28702833 | 51.531529   | 72.73371933 | 34.84256036 |
| CTR9     | 9646   | 4324  | 28.5970471  | 26.84917409 | 28.5850105  | 22.61173469 |
| CHD7     | 55636  | 11589 | 10.66991386 | 11.95978341 | 12.21509967 | 11.52843641 |
| IGF2BP3  | 10643  | 4168  | 29.61834105 | 26.78483087 | 36.14348245 | 32.29731139 |
| MCTP1    | 79772  | 3924  | 31.46005237 | 16.80898947 | 25.84523075 | 15.47621276 |
| NOC3L    | 64318  | 3475  | 35.52496273 | 20.96871595 | 31.73831523 | 9.378718543 |
| DCTN4    | 51164  | 4105  | 30.07289781 | 31.64712672 | 20.27921948 | 31.36291275 |
| LTA4H    | 4048   | 2060  | 59.9268182  | 54.41011671 | 41.12873267 | 72.12756573 |
| PTK2B    | 2185   | 4748  | 25.95721553 | 58.85260882 | 20.73687843 | 70.00593786 |
| IFITM1   | 8519   | 733   | 168.137598  | 89.68027558 | 121.6400673 | 1190.270668 |
| CD99     | 4267   | 1255  | 98.20307516 | 45.09920472 | 93.09997851 | 21.45262054 |
| USP12    | 219333 | 4503  | 27.36950018 | 13.26208295 | 36.17600511 | 11.77800624 |
| WDR36    | 134430 | 6611  | 18.64239288 | 11.25792115 | 17.22621182 | 5.389121144 |
| EDF1     | 8721   | 658   | 187.3022178 | 163.9073243 | 198.4407029 | 114.1354227 |
| TMEM66   | 51669  | 1977  | 62.23595001 | 59.8503569  | 65.83278351 | 52.73184847 |
| PML      | 5371   | 5600  | 21.97151306 | 34.41969148 | 23.5054297  | 102.87724   |
| BLM      | 641    | 4528  | 27.17324937 | 20.22619996 | 28.2304065  | 9.924736655 |
| TCF25    | 22980  | 2286  | 53.82347907 | 49.42089727 | 46.6748926  | 34.26945318 |
| DEPDC1   | 55635  | 5356  | 22.97245578 | 15.06076025 | 15.58205391 | 3.817273181 |
| SETD3    | 84193  | 2905  | 42.35472398 | 31.75653407 | 42.76607218 | 29.19714065 |
| SPCS1    | 28972  | 1100  | 111.8549756 | 81.43521751 | 119.4719287 | 52.63150437 |
| SLMAP    | 7871   | 4420  | 27.79096991 | 23.08990263 | 23.3751693  | 25.00591837 |
| ARHGAP26 | 23092  | 9041  | 13.58655978 | 12.74245084 | 13.71796869 | 19.18831275 |
| PSMD8    | 5714   | 1556  | 78.94350064 | 75.1845498  | 94.91519807 | 52.9489378  |
| TCEB2    | 6923   | 998   | 122.67266   | 98.24286702 | 106.9126297 | 67.34106463 |

|          |        |      |             |             |             |             |
|----------|--------|------|-------------|-------------|-------------|-------------|
| C9orf5   | 23731  | 8006 | 15.26641625 | 11.32811675 | 15.20110199 | 7.914093693 |
| BTBD1    | 53339  | 3308 | 36.94768092 | 36.84687985 | 37.17283286 | 28.57747249 |
| UBE2J1   | 51465  | 4360 | 28.03278176 | 52.13058221 | 31.59579459 | 77.44296867 |
| IFT57    | 55081  | 3223 | 37.92210006 | 19.01302771 | 45.36427393 | 6.971642503 |
| E2F4     | 1874   | 2100 | 58.20139452 | 62.49926253 | 59.56218035 | 42.12448243 |
| TAF15    | 8148   | 2166 | 56.33358371 | 57.81716012 | 67.79451022 | 25.70080208 |
| SOS1     | 6654   | 8331 | 14.64632605 | 15.00529782 | 14.63345424 | 15.72097879 |
| SP3      | 6670   | 6359 | 19.18832243 | 12.68523854 | 20.13501579 | 18.81356471 |
| OAF      | 220323 | 1957 | 62.34979168 | 7.059594509 | 56.57292537 | 1.86189041  |
| ALG3     | 10195  | 1623 | 75.18086403 | 57.39005682 | 76.28642647 | 25.56864874 |
| CDCA5    | 113130 | 2599 | 46.8696253  | 36.18137474 | 47.47606796 | 16.90152492 |
| CLPX     | 10845  | 2351 | 51.81376272 | 33.7424227  | 40.98079591 | 26.0893005  |
| ICMT     | 23463  | 4815 | 25.25644236 | 19.85362861 | 29.44383694 | 8.870714451 |
| PSMC2    | 5701   | 2846 | 42.73006676 | 49.40527901 | 49.88874197 | 53.20336946 |
| PLOD3    | 8985   | 2995 | 40.60426377 | 30.80224757 | 33.08599435 | 18.51936843 |
| HJURP    | 55355  | 3065 | 39.67692332 | 28.86283062 | 29.91764647 | 7.595210192 |
| ECT2     | 1894   | 3916 | 31.05458886 | 22.76125483 | 22.33705087 | 10.59701657 |
| RPA1     | 6117   | 4345 | 27.94140019 | 23.48846251 | 25.18883921 | 13.65055393 |
| SART1    | 9092   | 3601 | 33.71435263 | 32.2398858  | 37.02323922 | 28.83810239 |
| RPS29    | 6235   | 735  | 165.1773929 | 175.2344106 | 172.189894  | 114.8473957 |
| UBA6     | 55236  | 6462 | 18.78758648 | 15.58656353 | 16.34824833 | 24.46563633 |
| PIK3C2A  | 5286   | 8304 | 14.62010884 | 12.02180187 | 12.08577332 | 19.30679907 |
| PRPF38A  | 84950  | 2780 | 43.59748117 | 45.28793773 | 46.89305675 | 46.01979906 |
| OTUD4    | 54726  | 7068 | 17.14784913 | 19.48367277 | 18.533751   | 16.92635229 |
| SREBF1   | 6720   | 5012 | 24.14138298 | 59.79847585 | 22.89058767 | 37.52123178 |
| TIMM23   | 1E+08  | 1182 | 102.3659996 | 64.09738817 | 98.84980798 | 47.61017251 |
| SPI1     | 6688   | 1426 | 84.85035868 | 202.5183446 | 106.0868788 | 369.0848834 |
| TRIM24   | 8805   | 4007 | 30.19630933 | 27.08248502 | 30.53004163 | 19.3487034  |
| FANCD2   | 2177   | 5204 | 23.21141916 | 20.29644361 | 21.0716355  | 9.841372469 |
| PCID2    | 55795  | 1950 | 61.94473093 | 32.91067344 | 60.89335174 | 15.1562123  |
| TLK1     | 9874   | 5751 | 21.00369072 | 21.85317931 | 22.81478644 | 18.23302921 |
| DBI      | 1622   | 789  | 153.0953426 | 182.1636016 | 143.5343879 | 126.229405  |
| CPSF1    | 29894  | 4494 | 26.83307502 | 18.79252059 | 23.60145754 | 10.18000067 |
| FIP1L1   | 81608  | 2458 | 49.05933244 | 47.95707495 | 53.72374933 | 35.74211819 |
| POLD1    | 5424   | 3470 | 34.75153866 | 27.99857364 | 37.8729457  | 14.75922257 |
| RNF24    | 11237  | 3374 | 35.67974303 | 31.1728     | 33.62771691 | 24.71864005 |
| PSMD11   | 5717   | 1598 | 75.33382539 | 49.50288053 | 78.40542146 | 57.51107871 |
| IPO11    | 51194  | 4480 | 26.87130647 | 10.99241592 | 25.37303607 | 4.066651265 |
| NOP2     | 4839   | 2729 | 44.11266141 | 38.45884738 | 47.84682394 | 18.91511911 |
| C15orf23 | 90417  | 2039 | 59.04043795 | 42.40268842 | 50.67103889 | 16.38095262 |
| NEAT1    | 283131 | 3756 | 32.05097257 | 65.3784927  | 38.70178802 | 108.9752825 |
| FAM136A  | 84908  | 1824 | 65.88764628 | 53.63133147 | 68.45904274 | 28.18910701 |
| PIN1     | 5300   | 997  | 120.5406889 | 99.01191509 | 109.1390693 | 65.98734249 |
| PIK3R1   | 5295   | 6453 | 18.62375125 | 21.16789644 | 15.38878628 | 21.89607103 |
| PPP3CB   | 5532   | 3165 | 37.90669215 | 40.76465228 | 36.18209815 | 34.85741874 |
| SUDS3    | 64426  | 4728 | 25.37535547 | 18.33373823 | 22.83555691 | 12.75884119 |
| SLAIN2   | 57606  | 6011 | 19.95918826 | 14.75418541 | 20.70316494 | 14.17776598 |
| MADD     | 8567   | 6031 | 19.89299961 | 23.09242712 | 17.62166058 | 29.70478258 |
| PPAT     | 5471   | 3713 | 32.3120605  | 18.30432773 | 32.94744865 | 6.160641399 |
| FAM192A  | 80011  | 2865 | 41.8046403  | 42.46654306 | 44.54310501 | 44.37184151 |
| RAB1A    | 5861   | 2648 | 45.23047374 | 41.31829615 | 47.15607778 | 62.76212103 |
| DDX55    | 57696  | 2638 | 45.40193119 | 31.00060474 | 45.73297905 | 17.26553987 |
| USP39    | 10713  | 2234 | 53.61248634 | 38.2027387  | 57.50274615 | 26.91198402 |
| COTL1    | 23406  | 1850 | 64.74069972 | 356.4118455 | 112.9516913 | 490.6437954 |
| PDCD2    | 5134   | 3133 | 38.22862894 | 30.5834837  | 35.40520259 | 13.95615525 |
| MEF2A    | 4205   | 5771 | 20.68298772 | 17.06672096 | 21.63737549 | 51.03690792 |
| CIAO1    | 9391   | 4053 | 29.45016584 | 24.74086063 | 26.6907964  | 17.68068529 |
| GTF3C3   | 9330   | 4162 | 28.67888566 | 23.77167516 | 28.58080746 | 19.11449859 |
| ZNF512   | 84450  | 3460 | 34.4384786  | 28.2082994  | 30.28822013 | 19.65783178 |
| SEH1L    | 81929  | 3513 | 33.91891146 | 24.16716564 | 35.60506084 | 9.56538322  |
| PPP1R15B | 84919  | 5284 | 22.55055563 | 26.18832271 | 20.99252455 | 30.64782179 |
| TAF7     | 6879   | 2310 | 51.58317574 | 54.88822408 | 48.01926395 | 59.939975   |

|          |          |       |             |             |             |             |
|----------|----------|-------|-------------|-------------|-------------|-------------|
| PUS7     | 54517    | 3484  | 34.20124454 | 18.93182396 | 28.92733386 | 5.229218618 |
| EIF4EBP1 | 1978     | 877   | 135.8690262 | 71.90610009 | 111.303945  | 30.4681983  |
| KDM2B    | 84678    | 5318  | 22.40638134 | 21.87263284 | 24.11618092 | 14.80722597 |
| POLDIP2  | 26073    | 2723  | 43.68444723 | 32.73340944 | 42.59835989 | 17.69301116 |
| CCDC86   | 79080    | 2022  | 58.82925312 | 26.77959564 | 59.03852135 | 11.41290325 |
| MANF     | 7873     | 969   | 122.7582557 | 66.91879387 | 117.5257857 | 42.82550764 |
| C12orf75 | 387882   | 1383  | 86.01066508 | 29.00208478 | 46.13738101 | 19.75986732 |
| RAB35    | 11021    | 2962  | 40.15960493 | 42.42999129 | 38.73316186 | 50.98309648 |
| ZNF395   | 55893    | 4807  | 24.74573534 | 16.64175865 | 30.10818838 | 15.24427884 |
| CD97     | 976      | 3247  | 36.57171655 | 59.22531781 | 37.02526308 | 77.24341275 |
| KIAA0101 | 9768     | 1508  | 78.74559923 | 72.40584584 | 74.81834388 | 30.74019205 |
| KCTD20   | 222658   | 5032  | 23.59864142 | 20.72450248 | 27.54427732 | 16.17178118 |
| YTHDC1   | 91746    | 6249  | 19.00277863 | 17.36590134 | 17.2435955  | 17.62222779 |
| RILPL2   | 196383   | 1435  | 82.60904353 | 109.4752911 | 90.84508555 | 123.8554297 |
| RAB6A    | 5870     | 3419  | 34.67211976 | 37.8665662  | 32.5053479  | 45.17497    |
| CCND1    | 595      | 4304  | 27.54274569 | 42.4541825  | 31.2705374  | 37.29695361 |
| HGS      | 9146     | 2986  | 39.63147733 | 35.14875905 | 36.08681457 | 37.28595935 |
| DPP3     | 10072    | 2697  | 43.87823185 | 40.65023392 | 48.17950621 | 23.1175713  |
| KIFC1    | 3833     | 2721  | 43.49121327 | 30.30065908 | 34.55410467 | 13.01912937 |
| WDR75    | 84128    | 2777  | 42.54058521 | 32.09689373 | 45.11770381 | 13.92290703 |
| VPS4A    | 27183    | 2211  | 53.43066718 | 40.31346626 | 51.22054821 | 41.74923632 |
| WHSC1L1  | 54904    | 5431  | 21.7143839  | 18.66854567 | 16.61178293 | 15.31914246 |
| SFSWAP   | 6433     | 3245  | 36.34231709 | 26.98713254 | 31.70899192 | 21.14742205 |
| SYPL1    | 6856     | 2183  | 54.02236324 | 61.85827162 | 54.10361044 | 34.86635477 |
| DDX27    | 55661    | 2711  | 43.50085539 | 31.31658166 | 43.41040652 | 23.07285823 |
| IFNGR2   | 3460     | 2234  | 52.78908637 | 48.67607438 | 64.217705   | 86.08210376 |
| DACH1    | 1602     | 5246  | 22.44118048 | 49.91010381 | 33.38830865 | 25.73771475 |
| LRRC33   | 375387   | 2488  | 47.31769807 | 30.80966381 | 41.61154866 | 14.64517497 |
| NDRG1    | 10397    | 3520  | 33.44500932 | 56.91096125 | 49.9400345  | 117.5467602 |
| CIRH1A   | 84916    | 2268  | 51.90759823 | 39.59504936 | 52.35539501 | 22.04582414 |
| RAB3GAP2 | 25782    | 7329  | 16.03520898 | 15.5973758  | 16.37464108 | 12.40149536 |
| PSMD12   | 5718     | 1814  | 64.78613375 | 48.27632034 | 70.2341296  | 55.34989858 |
| FAF2     | 23197    | 4515  | 26.02924621 | 21.71569907 | 24.52119933 | 19.4582783  |
| PRPF6    | 24148    | 3120  | 37.60181425 | 36.13889054 | 31.35411683 | 22.44884185 |
| CHMP5    | 51510    | 2070  | 56.67519829 | 51.77899583 | 56.2405331  | 145.9052481 |
| PHF17    | 79960    | 5771  | 20.32882697 | 10.73427246 | 16.03582143 | 2.911383751 |
| MAPK14   | 1432     | 4353  | 26.95099023 | 20.98814628 | 29.99632036 | 25.43730486 |
| UBAP1    | 51271    | 2898  | 40.41175786 | 56.82310353 | 37.69296812 | 95.48663066 |
| TXLNG    | 55787    | 4418  | 26.50821057 | 13.87030066 | 24.19875266 | 10.12602506 |
| FNDC3A   | 22862    | 6303  | 18.58056073 | 24.53528212 | 14.74937252 | 47.91747795 |
| PI4K2B   | 55300    | 3601  | 32.4656729  | 26.60873492 | 27.22469572 | 60.14964825 |
| DENND4A  | 10260    | 7341  | 15.92547175 | 13.78096157 | 15.68590041 | 17.84109445 |
| NUDCD3   | 23386    | 4932  | 23.70415412 | 15.67780649 | 22.96200975 | 10.99978412 |
| HOOK3    | 84376    | 14460 | 8.084985347 | 4.931290395 | 8.094865684 | 4.521751226 |
| KIAA1429 | 25962    | 6456  | 18.10856384 | 16.32587669 | 17.05070642 | 11.7581821  |
| MFN2     | 9927     | 4685  | 24.95387153 | 26.49259454 | 24.57848345 | 22.68413085 |
| ABR      | 29       | 5603  | 20.82893128 | 18.69201532 | 19.00544703 | 20.19591904 |
| LRMP     | 4033     | 2885  | 40.45216705 | 74.99845299 | 48.70168676 | 69.88531976 |
| HPS3     | 84343    | 4451  | 26.21983868 | 25.58245381 | 26.53520144 | 48.3900944  |
| KIF4A    | 24137    | 4504  | 25.86592269 | 24.78667297 | 21.86027948 | 7.191078613 |
| USP47    | 55031    | 7777  | 14.98008432 | 14.26908538 | 14.31748351 | 13.71737312 |
| IFNAR1   | 3454     | 6099  | 19.06799961 | 20.35051736 | 21.33979554 | 20.17982434 |
| LOC10050 | 1.01E+08 | 3881  | 29.96540315 | 24.00001603 | 25.42385559 | 6.728503819 |
| PIK3AP1  | 118788   | 4817  | 24.10034118 | 61.71035944 | 31.84403918 | 170.9530028 |
| LRCH4    | 4034     | 3201  | 36.26721132 | 47.26753919 | 33.9270126  | 47.87211786 |
| C14orf43 | 91748    | 8100  | 14.33226462 | 22.88849305 | 12.9640156  | 24.84127034 |
| DLST     | 1743     | 2857  | 40.63400191 | 33.38200527 | 40.52644355 | 26.00328761 |
| ZCRB1    | 85437    | 1844  | 62.95626    | 52.20375261 | 67.02905933 | 43.14237697 |
| PPP2R5D  | 5528     | 2975  | 39.02230032 | 23.66895072 | 32.81128059 | 15.44583257 |
| PIP5K1A  | 8394     | 3824  | 30.30516665 | 28.43680705 | 30.33350784 | 41.81977033 |
| CLCN7    | 1186     | 4225  | 27.42886563 | 26.8454051  | 24.5040315  | 29.8013616  |
| MOB1A    | 55233    | 1336  | 86.74173449 | 101.2420955 | 98.68390052 | 161.3673196 |

|          |        |       |             |             |             |             |
|----------|--------|-------|-------------|-------------|-------------|-------------|
| GGA2     | 23062  | 5973  | 19.40180098 | 25.03276937 | 20.23353147 | 23.24898711 |
| SLFN13   | 146857 | 8469  | 13.68366481 | 17.83924433 | 13.77130574 | 13.05067413 |
| CARM1    | 10498  | 2968  | 39.04547078 | 17.04279631 | 28.68859799 | 9.207512297 |
| EXOC5    | 10640  | 8522  | 13.5985634  | 12.49871196 | 13.38814493 | 10.76041715 |
| UBE2G2   | 7327   | 3515  | 32.85296869 | 24.34359913 | 32.218672   | 11.63318074 |
| KANK1    | 23189  | 5263  | 21.94151338 | 17.02047107 | 16.53986732 | 7.730990206 |
| MARK2    | 2011   | 4748  | 24.32143744 | 30.41187441 | 24.60835574 | 47.15381686 |
| CNOT6    | 57472  | 6178  | 18.65875668 | 15.65383379 | 20.14352937 | 13.17196551 |
| FH       | 2271   | 1877  | 61.41385124 | 49.74261849 | 63.03647648 | 20.05954636 |
| PITPNB   | 23760  | 2941  | 39.19544331 | 24.01834786 | 37.86027516 | 17.89578523 |
| LRBA     | 987    | 10180 | 11.32355587 | 10.90085236 | 8.800072575 | 5.070664052 |
| TFG      | 10342  | 2090  | 55.15492764 | 48.08494776 | 48.72691626 | 48.91223722 |
| CLSPN    | 63967  | 8484  | 13.58719929 | 11.97686283 | 15.39061557 | 7.444342909 |
| ZCCHC11  | 23318  | 5864  | 19.65787837 | 20.86206411 | 20.14123151 | 23.99182465 |
| SEC13    | 6396   | 1621  | 70.98668267 | 58.14819596 | 67.7779617  | 38.33785375 |
| HSPB1    | 3315   | 914   | 125.6728954 | 54.12347485 | 102.6372364 | 25.91266626 |
| ZNF217   | 7764   | 5653  | 20.31930416 | 21.44365478 | 18.53834099 | 39.03192298 |
| ATP1B3   | 483    | 1853  | 61.9886813  | 44.49438389 | 77.30764609 | 32.22693717 |
| MECP2    | 4204   | 10241 | 11.21619241 | 11.94562483 | 10.9552005  | 16.54457165 |
| DCUN1D5  | 84259  | 12732 | 9.021758282 | 5.128022041 | 9.658162984 | 3.036750929 |
| POGZ     | 23126  | 6636  | 17.2785775  | 17.6291681  | 16.81108409 | 18.02824864 |
| FAM126A  | 84668  | 6165  | 18.598644   | 13.87960275 | 19.91183234 | 10.08039918 |
| MOB3A    | 126308 | 3347  | 34.25773537 | 40.07925791 | 46.58743767 | 91.02343554 |
| NDUFB9   | 4715   | 736   | 155.7889134 | 81.74568598 | 142.3875566 | 57.48319614 |
| ALMS1    | 7840   | 12928 | 8.869170813 | 4.464237728 | 7.550553817 | 2.019904341 |
| U2AF1    | 7307   | 1038  | 110.2661408 | 81.36183769 | 112.9701759 | 60.26061527 |
| TUBB6    | 84617  | 1843  | 61.99233203 | 21.15882791 | 55.14268595 | 5.052483829 |
| TRPC4AP  | 26133  | 3189  | 35.82686357 | 43.32275464 | 38.02993196 | 63.22331374 |
| HDAC7    | 51564  | 4301  | 26.56402417 | 20.82742136 | 29.32736632 | 23.2033084  |
| JUNB     | 3726   | 1832  | 62.36455673 | 55.22163694 | 48.20798594 | 77.56826517 |
| TMX1     | 81542  | 4119  | 27.73776837 | 29.48380995 | 30.93098109 | 39.11953749 |
| DENND4C  | 55667  | 7023  | 16.23914022 | 20.17963655 | 16.54657821 | 29.86135583 |
| PHACTR4  | 65979  | 6225  | 18.32088061 | 13.78161986 | 15.61301048 | 27.08807114 |
| KPNA4    | 3840   | 3816  | 29.88665665 | 24.1752441  | 28.12700702 | 21.69638494 |
| PSEN1    | 5663   | 6107  | 18.6748783  | 23.53480951 | 18.198098   | 40.10789654 |
| NACC1    | 112939 | 4556  | 25.03237089 | 26.21560997 | 25.92365707 | 26.74762412 |
| ZNF598   | 90850  | 3210  | 35.46513882 | 23.53279755 | 29.09279269 | 9.459292661 |
| FAM107B  | 83641  | 3785  | 30.07743609 | 70.29385088 | 41.69873626 | 55.78158628 |
| RASA3    | 22821  | 4220  | 26.97703687 | 16.52763752 | 26.6859663  | 14.43864639 |
| FGFR1OP2 | 26127  | 3030  | 37.57197875 | 44.56653695 | 34.79574123 | 58.92483734 |
| PRKD2    | 25865  | 3617  | 31.41794565 | 32.03566383 | 27.16268013 | 126.5949925 |
| FAR1     | 84188  | 5292  | 21.47367903 | 27.11720502 | 21.55966953 | 21.26803624 |
| CD47     | 961    | 5346  | 21.21854158 | 28.84403626 | 26.874979   | 51.42132359 |
| PSMD14   | 10213  | 1715  | 66.14246254 | 54.96106452 | 69.23733871 | 36.70867427 |
| ARHGEF7  | 8874   | 5525  | 20.49410626 | 20.36751236 | 21.45352962 | 17.69649607 |
| AGPAT3   | 56894  | 6555  | 17.27382717 | 25.73369067 | 17.82463357 | 27.97872614 |
| PBX2     | 5089   | 3231  | 35.04485828 | 37.03533015 | 34.72367944 | 40.59854633 |
| COPS6    | 10980  | 1441  | 78.43549683 | 54.43241154 | 63.78131242 | 34.41712104 |
| CHD1L    | 9557   | 3023  | 37.38853818 | 38.03561539 | 36.06448457 | 17.81213283 |
| MEF2D    | 4209   | 5888  | 19.19591558 | 12.48892425 | 16.3989701  | 14.23327943 |
| APPL1    | 26060  | 6061  | 18.64800378 | 23.7134271  | 19.5911625  | 23.61280418 |
| PPME1    | 51400  | 2484  | 45.41914845 | 32.83283519 | 42.0187891  | 26.32227163 |
| CHML     | 1122   | 7082  | 15.93069257 | 7.771769716 | 12.73914051 | 1.286260778 |
| MAPKAPK2 | 9261   | 3608  | 31.26972416 | 87.26790009 | 32.09092273 | 105.5906652 |
| UBE2V2   | 7336   | 1535  | 73.49913014 | 50.22808399 | 78.87046792 | 32.04574182 |
| PPP2R2D  | 55844  | 2466  | 45.75067509 | 33.34357691 | 53.72082132 | 24.95473412 |
| USMG5    | 84833  | 714   | 157.7265807 | 116.7218825 | 154.172774  | 92.99253088 |
| SNRPA1   | 6627   | 1068  | 105.4464219 | 59.46377823 | 91.79412853 | 28.05193981 |
| MYL12B   | 103910 | 1041  | 108.1813435 | 122.2261892 | 100.8727439 | 172.6770704 |
| COX7C    | 1350   | 448   | 251.3767379 | 324.7985338 | 245.2412409 | 189.3252089 |
| ATP6AP1  | 537    | 2109  | 53.39818805 | 61.5986037  | 56.50289493 | 75.05897147 |
| RCN1     | 5954   | 2529  | 44.53016156 | 48.02048762 | 33.75209316 | 19.45046014 |

|          |       |       |             |             |             |             |
|----------|-------|-------|-------------|-------------|-------------|-------------|
| PSMA7    | 5688  | 984   | 114.4479457 | 93.29986394 | 133.9854584 | 83.93391879 |
| TTK      | 7272  | 3019  | 37.23497596 | 34.02645501 | 33.66279239 | 12.67275757 |
| YTHDF2   | 51441 | 3073  | 36.58066789 | 40.60732296 | 41.11561578 | 35.50574589 |
| WDR5     | 11091 | 3163  | 35.53980159 | 23.1779808  | 32.13024667 | 9.471853214 |
| RABEP1   | 9135  | 5421  | 20.73646789 | 16.77102663 | 22.48871192 | 13.85373698 |
| MDM2     | 4193  | 7369  | 15.25476895 | 12.09568108 | 14.79480755 | 11.94959362 |
| CWC15    | 51503 | 1592  | 70.61079926 | 59.76730929 | 71.93237479 | 56.71059854 |
| EDEM1    | 9695  | 6162  | 18.2096732  | 41.51443072 | 21.25877183 | 87.74545488 |
| ZNF318   | 24149 | 8021  | 13.98927892 | 8.473253815 | 12.45950531 | 10.65016584 |
| EVL      | 51466 | 1853  | 60.55477941 | 82.97601321 | 67.72970764 | 211.2776152 |
| SBF1     | 6305  | 8033  | 13.96838121 | 8.543815125 | 16.17579089 | 6.325114478 |
| PKD1     | 5310  | 14138 | 7.936625142 | 4.791422844 | 6.710062092 | 2.319527217 |
| SLC35E1  | 79939 | 5109  | 21.92280683 | 19.7143029  | 20.05737116 | 15.72993905 |
| RPRD2    | 23248 | 7819  | 14.32454535 | 15.50338669 | 14.13248883 | 20.60792619 |
| DNAJC2   | 27000 | 2212  | 50.63454796 | 42.51147964 | 59.2208644  | 36.51406705 |
| SMAD5    | 4090  | 7096  | 15.78405018 | 10.83388898 | 13.78591383 | 5.705435822 |
| TOMM6    | 1E+08 | 881   | 127.1323724 | 115.5897127 | 138.857976  | 50.54977282 |
| PMPCB    | 9512  | 3939  | 28.3826438  | 33.82938448 | 30.19886282 | 18.70629757 |
| FAM96A   | 84191 | 1108  | 100.9018357 | 128.9131326 | 112.3165383 | 110.349308  |
| MAGT1    | 84061 | 4035  | 27.707369   | 29.87669949 | 29.16619878 | 34.91709755 |
| TUBGCP2  | 10844 | 3198  | 34.95911004 | 28.84700797 | 36.07300804 | 16.39433255 |
| SAFB2    | 9667  | 3334  | 33.53306356 | 29.00701415 | 34.66489636 | 24.5294723  |
| KIAA1797 | 54914 | 6117  | 18.2768079  | 16.7935046  | 14.5070459  | 7.578258888 |
| ATXN10   | 25814 | 3340  | 33.41163106 | 21.54938837 | 26.18918898 | 10.84873248 |
| TCIRG1   | 10312 | 2727  | 40.92220306 | 165.1429614 | 46.95216919 | 253.2030992 |
| E2F3     | 1871  | 5050  | 22.09798965 | 19.19449859 | 19.45493347 | 14.14997795 |
| OXA1L    | 5018  | 1737  | 64.24573849 | 95.05988451 | 65.07619305 | 59.90122945 |
| SLC25A39 | 51629 | 1628  | 68.54720378 | 64.87880379 | 58.27202571 | 40.28682531 |
| POLR1B   | 84172 | 5427  | 20.56289806 | 10.14182295 | 16.429366   | 4.438738657 |
| SDHB     | 6390  | 1161  | 96.11959324 | 122.0685508 | 101.9116851 | 86.13252222 |
| CTPS     | 1503  | 3217  | 34.68910406 | 23.89719498 | 35.46589093 | 9.501634537 |
| EVI2B    | 2124  | 2009  | 55.5474603  | 87.62459977 | 90.02476641 | 373.7225748 |
| PRPS1    | 5631  | 2156  | 51.76013347 | 32.24665939 | 48.60725493 | 17.36982358 |
| NCSTN    | 23385 | 2944  | 37.83643396 | 39.43472444 | 47.36682829 | 64.63421575 |
| PLTP     | 5360  | 1745  | 63.83407541 | 107.0107678 | 54.84928189 | 78.76744868 |
| IBTK     | 25998 | 5775  | 19.25300007 | 21.60801791 | 18.0735363  | 14.65199389 |
| ABCC1    | 4363  | 6564  | 16.93876834 | 17.68675027 | 16.06201949 | 27.69365005 |
| UBQLN4   | 56893 | 3545  | 31.36419617 | 31.86915971 | 28.42957156 | 20.21433497 |
| EYA3     | 2140  | 6040  | 18.40829063 | 19.95902027 | 20.42885772 | 20.51100399 |
| TPD52L2  | 7165  | 2426  | 45.7467804  | 35.91408893 | 47.37795143 | 75.26415267 |
| PRDX4    | 10549 | 921   | 120.5012913 | 89.27824177 | 134.8918998 | 49.23351281 |
| ELMO1    | 9844  | 5539  | 20.03641257 | 17.09765138 | 21.05600077 | 16.51883843 |
| RNF44    | 22838 | 4153  | 26.7232577  | 26.18404771 | 30.42337763 | 20.95940551 |
| SLC29A1  | 2030  | 2503  | 44.33946834 | 87.77987501 | 46.42693518 | 61.54549129 |
| CREBBP   | 1387  | 10197 | 10.88375887 | 10.77341508 | 11.08535327 | 20.50691531 |
| GGCT     | 79017 | 1217  | 91.02489982 | 67.1976954  | 85.59029363 | 22.62146702 |
| SACM1L   | 22908 | 3707  | 29.88327572 | 34.38367836 | 30.4359489  | 24.19098632 |
| NOL6     | 65083 | 4895  | 22.63070543 | 19.16497656 | 20.76158738 | 8.188133782 |
| ZC3H4    | 23211 | 6131  | 18.03505414 | 21.11658617 | 15.02530679 | 16.44259888 |
| PITPNM1  | 9600  | 4248  | 26.02940605 | 27.11970292 | 28.3503564  | 28.82991104 |
| RARS     | 5917  | 2154  | 51.33375901 | 43.34581936 | 50.12372937 | 30.1669754  |
| RRBP1    | 6238  | 3792  | 29.1056252  | 62.994894   | 35.827031   | 113.5459366 |
| MSH2     | 4436  | 3145  | 35.09333251 | 21.46845898 | 34.12803141 | 11.006466   |
| TDG      | 6996  | 3251  | 33.94910204 | 30.15883768 | 39.0594099  | 23.66132511 |
| EBP      | 10682 | 1191  | 92.66879156 | 119.5550676 | 100.409047  | 77.33428434 |
| CHD9     | 80205 | 11479 | 9.614821042 | 15.19975539 | 9.626442216 | 17.22911396 |
| IVD      | 3712  | 4673  | 23.5746083  | 32.13978804 | 21.5670514  | 17.84735535 |
| LANCL1   | 10314 | 4620  | 23.84505294 | 18.03883638 | 17.83572661 | 8.719338469 |
| TNIP1    | 10318 | 3268  | 33.70995856 | 58.70836645 | 35.94685658 | 80.33972927 |
| VHL      | 7428  | 4560  | 24.15880363 | 28.92915556 | 27.05927646 | 26.99051506 |
| LAS1L    | 81887 | 2499  | 44.00150396 | 29.42568466 | 41.8511232  | 12.39360385 |
| PSMC5    | 5705  | 1507  | 72.96599762 | 62.25120125 | 70.38151971 | 41.10367091 |

|          |        |       |             |             |             |             |
|----------|--------|-------|-------------|-------------|-------------|-------------|
| LYRM7    | 90624  | 6213  | 17.66543896 | 9.540237267 | 16.59535869 | 3.551383561 |
| TOR1A    | 1861   | 2117  | 51.84476724 | 57.78703067 | 56.18957045 | 92.8476268  |
| C2orf29  | 55571  | 2544  | 43.142835   | 37.31396372 | 41.44304085 | 37.00055868 |
| CDC25B   | 994    | 3701  | 29.65559909 | 22.63850026 | 25.17605506 | 14.22088743 |
| INTS10   | 55174  | 2539  | 43.22779529 | 28.52328576 | 38.77853438 | 9.407879413 |
| KPNA1    | 3836   | 7012  | 15.62335797 | 13.44241666 | 17.11490936 | 11.43209209 |
| MAP4K4   | 9448   | 7495  | 14.6165425  | 4.667742696 | 15.30722154 | 8.561701075 |
| VAMP8    | 8673   | 790   | 138.6721343 | 225.3712849 | 159.3996427 | 211.3972303 |
| CDK5RAP2 | 55755  | 6230  | 17.58442794 | 16.20276183 | 15.29525319 | 17.12359724 |
| DNAJB11  | 51726  | 1723  | 63.58153573 | 70.22527441 | 72.83990032 | 81.18302049 |
| SPG11    | 80208  | 7817  | 14.01445389 | 21.4366354  | 13.29820936 | 31.56719764 |
| DNAJC21  | 134218 | 6218  | 17.61836379 | 17.55998963 | 21.20323112 | 11.06880241 |
| NDUFS5   | 4725   | 584   | 187.2373286 | 144.6123074 | 191.0245788 | 96.01506    |
| NUP133   | 55746  | 4170  | 26.22220621 | 17.36705577 | 27.10727754 | 8.398127888 |
| C19orf50 | 79036  | 1592  | 68.68505019 | 58.08766593 | 73.39225693 | 39.54483441 |
| LTN1     | 26046  | 7756  | 14.09832387 | 13.04358418 | 12.99417627 | 13.70231473 |
| TMED9    | 54732  | 1402  | 77.99329522 | 77.72124311 | 95.99742724 | 61.21957054 |
| SMAD3    | 4088   | 6256  | 17.47867646 | 19.98227879 | 17.02166236 | 35.33444986 |
| TYMS     | 7298   | 1603  | 68.08622192 | 55.18688449 | 64.18944403 | 19.32103308 |
| GPS1     | 2873   | 2363  | 46.18798719 | 39.13481344 | 49.17757882 | 19.8745223  |
| CKS1B    | 1163   | 942   | 115.8622226 | 107.3949457 | 119.3243026 | 62.9635423  |
| MDM4     | 4194   | 10090 | 10.81686955 | 8.900056685 | 10.72128819 | 6.881377601 |
| CEBPD    | 1052   | 1269  | 86.0064726  | 88.50092444 | 71.59373316 | 66.35965878 |
| DYNC112  | 1781   | 2602  | 41.94550874 | 30.57312392 | 39.22003833 | 26.13993004 |
| ATAD1    | 84896  | 3034  | 35.97304342 | 36.42881069 | 39.27640257 | 25.88740897 |
| SNHG1    | 23642  | 1134  | 96.24533839 | 110.6303364 | 100.7981093 | 50.69647009 |
| ZNF445   | 353274 | 10264 | 10.61358414 | 6.187384563 | 9.42794434  | 3.07666273  |
| USP5     | 8078   | 3214  | 33.89478145 | 23.57284157 | 30.83153487 | 10.95912326 |
| RCN2     | 5955   | 2213  | 49.2263116  | 31.21470053 | 51.65162942 | 10.24493116 |
| GXYLT1   | 283464 | 7509  | 14.48041569 | 15.43121535 | 13.56229258 | 10.35193546 |
| DBF4     | 10926  | 3923  | 27.71691088 | 25.67432412 | 29.89116558 | 17.18297511 |
| FBXW2    | 26190  | 9186  | 11.83686495 | 10.04275326 | 9.936317974 | 6.963588144 |
| MKLN1    | 4289   | 11266 | 9.651468258 | 10.58188233 | 10.05224854 | 11.75115182 |
| MTIF2    | 4528   | 2965  | 36.67232425 | 24.27485908 | 34.3471349  | 13.04010551 |
| WARS     | 7453   | 2884  | 37.63143385 | 105.3123957 | 53.55380047 | 384.4323448 |
| GPX4     | 2879   | 1031  | 105.265815  | 74.34960577 | 88.94043301 | 45.15871821 |
| UAP1     | 6675   | 2344  | 46.30079148 | 24.33667547 | 32.35973947 | 10.01781062 |
| B4GALT1  | 2683   | 4214  | 25.75440323 | 67.42090011 | 30.3840924  | 103.5202182 |
| URB1     | 9875   | 10808 | 10.02263777 | 6.082128238 | 9.794010496 | 2.584676451 |
| RPS10    | 6204   | 813   | 133.2406754 | 111.2792989 | 123.1844734 | 53.03486815 |
| NBN      | 4683   | 4639  | 23.35086636 | 38.90805662 | 21.72511989 | 75.01082462 |
| C19orf43 | 79002  | 945   | 114.6292794 | 131.5773948 | 125.2057845 | 109.6757437 |
| AKIRIN1  | 79647  | 2726  | 39.73758953 | 47.16597913 | 41.62139283 | 62.30294058 |
| ANKRD12  | 23253  | 11358 | 9.519306471 | 8.220364052 | 9.76620001  | 11.51338664 |
| ZDHHC6   | 64429  | 2187  | 49.43771509 | 50.231602   | 52.26568628 | 39.61570798 |
| AK3      | 50808  | 4333  | 24.95275396 | 30.65042236 | 24.08831574 | 16.53815312 |
| CUL4B    | 8450   | 5365  | 20.11479902 | 18.56592919 | 17.56439955 | 21.95966416 |
| POLR3A   | 11128  | 6652  | 16.22307527 | 13.16494965 | 14.00730303 | 6.999193999 |
| HS6ST1   | 9394   | 3966  | 27.2102614  | 7.641262008 | 34.09537248 | 7.094708006 |
| NFAT5    | 10725  | 14239 | 7.57889576  | 10.07825332 | 7.00375078  | 17.71376945 |
| EXOC4    | 60412  | 4203  | 25.62729254 | 31.75750135 | 24.02905447 | 21.76965169 |
| HNRNPA0  | 10949  | 2983  | 36.10845141 | 38.76974971 | 37.11472174 | 18.18670307 |
| MAP7D3   | 79649  | 4589  | 23.47167369 | 11.26545715 | 22.09995325 | 4.102393605 |
| UBE2Z    | 65264  | 3137  | 34.33583378 | 37.64785557 | 32.86801516 | 60.72220594 |
| ARHGAP1  | 392    | 3372  | 31.94291535 | 29.47312497 | 30.38941556 | 24.79333345 |
| ATP5J    | 522    | 1303  | 82.66424448 | 69.77416376 | 86.91376216 | 43.34432292 |
| HSD17B4  | 3295   | 2899  | 37.15471216 | 28.67078007 | 37.38843828 | 28.34981661 |
| ARFGEF1  | 10565  | 7212  | 14.90670055 | 17.73515821 | 14.56025047 | 15.43758661 |
| ARHGEF18 | 23370  | 5773  | 18.62240159 | 32.23026013 | 20.01953308 | 30.01543508 |
| CAPG     | 822    | 1460  | 73.49502618 | 31.89865145 | 58.46509835 | 65.30410579 |
| NDUFB11  | 54539  | 1141  | 94.04271536 | 109.3657348 | 102.772167  | 76.46524096 |
| HSP90AB2 | 391634 | 4889  | 21.94778855 | 26.38988023 | 22.29963937 | 26.58198609 |



|          |        |       |             |             |             |             |
|----------|--------|-------|-------------|-------------|-------------|-------------|
| ME2      | 4200   | 4638  | 23.13556236 | 22.48505745 | 20.40870485 | 24.48525056 |
| CDC25A   | 993    | 3717  | 28.86810283 | 16.96573844 | 27.17086789 | 7.515518721 |
| ARL5A    | 26225  | 3169  | 33.79563018 | 27.98592885 | 38.86999554 | 19.35498437 |
| EIF4A3   | 9775   | 1734  | 61.76375551 | 54.744362   | 70.79379836 | 32.570734   |
| PGAM5    | 192111 | 2851  | 37.56518837 | 34.62465077 | 43.72431049 | 17.67968673 |
| MEPCE    | 56257  | 3047  | 35.14878637 | 28.96020452 | 37.65265029 | 22.12300997 |
| STAR     | 6770   | 2695  | 39.73964826 | 29.60077964 | 36.76903639 | 4.056088534 |
| PCGF3    | 10336  | 5666  | 18.86586055 | 18.87746006 | 19.01786592 | 25.68767251 |
| KIAA0494 | 9813   | 5794  | 18.44907937 | 22.5755585  | 22.09847521 | 30.95477607 |
| TTC17    | 55761  | 4525  | 23.62297589 | 27.57708364 | 20.26465998 | 21.78626658 |
| SCAMP1   | 9522   | 6245  | 17.08399995 | 8.278171795 | 14.14203847 | 6.612568141 |
| PSMD13   | 5719   | 1763  | 60.51592724 | 60.92192515 | 73.58414264 | 46.27273498 |
| RMND5A   | 64795  | 6201  | 17.20522169 | 14.98487817 | 20.27325157 | 20.69664556 |
| CBX1     | 10951  | 2443  | 43.58788111 | 35.02568602 | 42.03208924 | 21.95810425 |
| C9orf78  | 51759  | 1835  | 58.03007823 | 48.33101282 | 67.47295376 | 43.68492083 |
| ZMIZ2    | 83637  | 5159  | 20.64066555 | 17.23400683 | 21.78784513 | 17.57862582 |
| THUMPD1  | 55623  | 4416  | 24.11349492 | 16.8537402  | 29.18562147 | 16.7315523  |
| BRWD3    | 254065 | 12793 | 8.323707774 | 11.56577055 | 8.489046146 | 17.2633385  |
| PIGT     | 51604  | 2245  | 47.43215748 | 49.52940298 | 44.51567578 | 39.31357873 |
| TMEM30A  | 55754  | 4544  | 23.43424154 | 25.59829697 | 25.52714216 | 29.49117678 |
| PCNXL3   | 399909 | 6584  | 16.14228545 | 20.98363678 | 14.69751226 | 17.61721423 |
| STOM     | 2040   | 3108  | 34.19588397 | 25.59564622 | 28.61997572 | 37.58090538 |
| HOMER3   | 9454   | 1991  | 53.38061647 | 44.65607293 | 47.0111247  | 26.23136446 |
| TEX261   | 113419 | 3381  | 31.43472564 | 30.25146474 | 39.43232311 | 20.35664401 |
| KIAA0930 | 23313  | 6287  | 16.90485245 | 13.71659758 | 15.79510702 | 6.343007158 |
| PANK3    | 79646  | 3404  | 31.22232884 | 22.78077976 | 23.02780448 | 18.25665715 |
| TCF3     | 6929   | 4462  | 23.77329028 | 11.58610104 | 22.39751056 | 4.899667682 |
| RBM14    | 10432  | 5415  | 19.5893668  | 15.22587135 | 19.31411946 | 8.672852485 |
| SSU72    | 29101  | 1319  | 80.42185081 | 65.54896261 | 87.62150452 | 53.86848438 |
| CTDSP2   | 10106  | 5038  | 21.05526423 | 27.46706972 | 23.4854042  | 32.54612525 |
| JARID2   | 3720   | 5756  | 18.42884316 | 11.45908177 | 25.10750118 | 17.54899281 |
| FOXJ3    | 22887  | 5367  | 19.72648315 | 15.90179211 | 18.69950841 | 14.4080167  |
| ANAPC7   | 51434  | 3070  | 34.4860049  | 24.60595444 | 31.45183581 | 10.02253654 |
| CUX1     | 1523   | 13882 | 7.626569302 | 12.34392267 | 7.503485618 | 14.61127508 |
| USP4     | 7375   | 4120  | 25.69709589 | 28.34085602 | 23.43619804 | 35.62158389 |
| AGPAT5   | 55326  | 5535  | 19.12773894 | 15.33861841 | 20.61314745 | 6.071037263 |
| ROCK2    | 9475   | 6401  | 16.50799076 | 12.18425866 | 15.61282489 | 12.36520628 |
| COBRA1   | 25920  | 2622  | 40.30040003 | 27.11046012 | 37.06750199 | 16.75326593 |
| FAM193A  | 8603   | 4742  | 22.28335067 | 22.27387022 | 22.99091878 | 21.25887258 |
| CCDC14   | 64770  | 4187  | 25.23707879 | 29.1646313  | 23.71718124 | 13.73054623 |
| ST3GAL4  | 6484   | 1766  | 59.83445576 | 37.34907966 | 41.27590185 | 20.40336218 |
| BRWD1    | 54014  | 13003 | 8.126405359 | 7.506015221 | 7.994470706 | 6.304982658 |
| PHKB     | 5257   | 5603  | 18.85911991 | 28.07779322 | 16.32809239 | 16.51079607 |
| DNAJC5   | 80331  | 5307  | 19.9109947  | 25.65494072 | 22.57366868 | 42.72099614 |
| TESC     | 54997  | 1044  | 101.0184509 | 131.6932629 | 100.3804997 | 59.52649514 |
| THBS1    | 7057   | 5820  | 18.12083552 | 21.97696925 | 87.63598177 | 162.6387222 |
| COX5B    | 1329   | 523   | 201.6505979 | 260.7525871 | 213.3046922 | 227.2002726 |
| KAT7     | 11143  | 3664  | 28.72785932 | 23.47527738 | 23.70033759 | 17.67937668 |
| ZNF706   | 51123  | 2870  | 36.67556674 | 18.55645005 | 30.47801087 | 15.37612966 |
| PHF20    | 51230  | 5899  | 17.84351187 | 14.5810165  | 18.30251111 | 11.70168542 |
| SMARCA2  | 6595   | 5758  | 18.28045789 | 30.8436349  | 22.97052112 | 20.00382477 |
| PCYOX1   | 51449  | 5377  | 19.57576279 | 9.490177572 | 20.59014598 | 4.668249769 |
| C19orf2  | 8725   | 2295  | 45.86443422 | 30.68197315 | 41.3363215  | 13.93627902 |
| ZNF148   | 7707   | 9573  | 10.99539084 | 9.5203769   | 10.72645921 | 11.58790524 |
| USP8     | 9101   | 5866  | 17.94389303 | 23.81794977 | 19.9542717  | 31.57558977 |
| FEN1     | 2237   | 2308  | 45.60609902 | 46.05337549 | 55.65907058 | 22.71623722 |
| ZNF561   | 93134  | 4557  | 23.05343216 | 24.93848348 | 20.21508799 | 18.87914566 |
| ATG3     | 64422  | 1372  | 76.57032826 | 61.87992193 | 77.46081266 | 66.09922056 |
| REST     | 5978   | 7333  | 14.32626352 | 10.42296616 | 14.23355681 | 14.4375147  |
| PES1     | 23481  | 2690  | 39.05371389 | 27.75053881 | 39.11517143 | 11.88987373 |
| WHSC2    | 7469   | 2466  | 42.60117209 | 26.56642713 | 36.15659744 | 14.85791735 |
| PSMA3    | 5684   | 1014  | 103.6040339 | 113.3941473 | 109.6013654 | 88.83712428 |

|          |        |       |             |             |             |             |
|----------|--------|-------|-------------|-------------|-------------|-------------|
| TSC22D4  | 81628  | 2399  | 43.79095055 | 50.34402465 | 49.4083998  | 90.28715438 |
| MT2A     | 4502   | 466   | 225.0002236 | 76.50907631 | 238.4888079 | 1072.525456 |
| ATF6B    | 1388   | 2622  | 39.9885981  | 54.22092024 | 45.93146986 | 59.44707265 |
| PGM1     | 5236   | 2573  | 40.75013766 | 50.31705784 | 41.87921815 | 27.77201268 |
| ATXN7L3B | 552889 | 3701  | 28.33020919 | 26.07040057 | 25.86111778 | 19.9092424  |
| TRA2A    | 29896  | 1852  | 56.61452711 | 60.40065213 | 57.6127454  | 58.47702035 |
| PDXK     | 8566   | 7390  | 14.18810612 | 10.70441178 | 14.58122169 | 12.98393519 |
| QSOX1    | 5768   | 3316  | 31.61945241 | 19.89097548 | 28.03537244 | 50.42407744 |
| PREPL    | 9581   | 6903  | 15.18906334 | 10.10381433 | 13.89588319 | 4.516014037 |
| TNIK     | 23043  | 5816  | 17.99273006 | 8.429021775 | 21.07035103 | 31.88184981 |
| PNRC1    | 10957  | 2133  | 49.06034601 | 43.25022573 | 72.7065236  | 64.62918691 |
| ABL1     | 25     | 5881  | 17.79386466 | 14.54986413 | 16.56219605 | 11.97844658 |
| RPL7L1   | 285855 | 1293  | 80.93249655 | 53.42469626 | 80.39605769 | 33.34675005 |
| MRPL18   | 29074  | 994   | 105.2773823 | 64.78737011 | 112.0191843 | 41.74840735 |
| ANXA11   | 311    | 2731  | 38.31772905 | 78.49324157 | 58.41083663 | 72.56604058 |
| HMGNA4   | 10473  | 1980  | 52.85137275 | 53.56987775 | 45.67165549 | 52.54971493 |
| ETV5     | 2119   | 4102  | 25.51090152 | 22.00078921 | 23.07546882 | 40.16994014 |
| ZXDC     | 79364  | 12600 | 8.288994593 | 6.012945461 | 8.719688564 | 3.614801124 |
| SH3GLB1  | 51100  | 6469  | 16.14489595 | 15.29412769 | 18.38820848 | 24.00107248 |
| TAF1     | 6872   | 7709  | 13.54797404 | 15.72460507 | 13.89562511 | 10.92364859 |
| TIPRL    | 261726 | 3032  | 34.44634956 | 29.69142633 | 31.07948666 | 18.82748659 |
| LGALS9   | 3965   | 1835  | 56.80487504 | 155.3149884 | 44.21435878 | 403.7545713 |
| USP11    | 8237   | 3300  | 31.58695324 | 23.63376959 | 28.2353272  | 39.68832556 |
| CNP      | 1267   | 5222  | 19.96111561 | 16.25799557 | 18.93551672 | 72.17972861 |
| MCU      | 90550  | 2978  | 35.00233234 | 40.63067422 | 32.13969003 | 34.05535942 |
| PLK4     | 10733  | 3870  | 26.93461129 | 19.74977025 | 25.8782886  | 9.206067152 |
| KDM5A    | 5927   | 10835 | 9.620391851 | 12.36017015 | 10.95911729 | 19.46754732 |
| B3GALNT2 | 148789 | 4720  | 22.08409867 | 14.16309437 | 20.81513009 | 9.263693728 |
| PHRF1    | 57661  | 5539  | 18.81873004 | 19.95396491 | 19.45391376 | 14.47225668 |
| NCBP2    | 22916  | 2175  | 47.83106185 | 37.08755489 | 50.41691547 | 24.3845343  |
| CCP110   | 9738   | 5515  | 18.86356474 | 14.70736124 | 17.46978263 | 10.13061943 |
| CRKL     | 1399   | 5336  | 19.49635673 | 16.53705831 | 17.50147386 | 17.37489116 |
| NUMB     | 8650   | 3647  | 28.52551674 | 32.50534365 | 32.84849457 | 58.66940174 |
| SUPV3L1  | 6832   | 2490  | 41.78014439 | 23.9835982  | 39.71135274 | 13.33266407 |
| CSTF3    | 1479   | 2846  | 36.55395627 | 30.92723488 | 30.80926773 | 19.5600623  |
| MFSD1    | 64747  | 2379  | 43.64362058 | 63.88057629 | 58.88263841 | 43.90638642 |
| OTUB1    | 55611  | 2518  | 41.2343818  | 48.05327554 | 44.05262101 | 49.36112862 |
| RECQL    | 5965   | 3795  | 27.35920247 | 23.95671551 | 25.77729763 | 17.65585076 |
| DENND5A  | 23258  | 4965  | 20.9120188  | 24.72926673 | 16.59638609 | 41.17888249 |
| IWS1     | 55677  | 3000  | 34.60939112 | 39.21855251 | 33.66470531 | 28.81237483 |
| AMOTL1   | 154810 | 8999  | 11.53774568 | 6.586675646 | 11.2697728  | 2.294448719 |
| ERP44    | 23071  | 4862  | 21.3550336  | 26.67392483 | 21.46743565 | 34.64023323 |
| GOLT1B   | 51026  | 3272  | 31.73232682 | 28.12649719 | 29.05811205 | 26.97401719 |
| FLJ45340 | 402483 | 10263 | 10.11674689 | 14.95973105 | 11.01406483 | 21.02593471 |
| NEK9     | 91754  | 5560  | 18.6373718  | 22.96459143 | 14.93433655 | 19.7695814  |
| PFDN5    | 5204   | 743   | 139.4667392 | 185.6439191 | 157.5393779 | 194.527871  |
| RHOG     | 391    | 1332  | 77.79563603 | 140.3578247 | 95.17331593 | 160.1801964 |
| ACSL1    | 2180   | 3822  | 27.11245086 | 38.42143884 | 30.73634938 | 196.3379893 |
| GATC     | 283459 | 4346  | 23.84348532 | 19.58630593 | 22.60639992 | 13.46110018 |
| DNAJA3   | 9093   | 2728  | 37.98525924 | 27.36398438 | 35.2399437  | 15.8054794  |
| NCLN     | 56926  | 3749  | 27.64038069 | 16.10767073 | 31.22212798 | 8.747259482 |
| TAB2     | 23118  | 4395  | 23.53114927 | 24.69158532 | 25.14264623 | 42.65054086 |
| SUMO1    | 7341   | 1527  | 67.72717815 | 48.30230429 | 69.45969234 | 58.19664102 |
| ARHGAP30 | 257106 | 4425  | 23.37161605 | 47.58799708 | 21.39108996 | 82.89290388 |
| PIGS     | 94005  | 2873  | 35.92586664 | 41.18487838 | 43.90428212 | 40.3730381  |
| ZC3H18   | 124245 | 3744  | 27.56811294 | 28.98491385 | 29.45797154 | 21.30261004 |
| POLQ     | 10721  | 8787  | 11.7463315  | 10.90452423 | 9.954693434 | 6.88815637  |
| SLC39A9  | 55334  | 5401  | 19.0725104  | 24.34202629 | 19.67714034 | 21.47597454 |
| WDR6     | 11180  | 4273  | 24.10733178 | 25.08366987 | 24.62434148 | 12.83833884 |
| PTTG1    | 9232   | 728   | 141.4981163 | 96.41798859 | 132.6334285 | 42.82149024 |
| UBN1     | 29855  | 6485  | 15.88444544 | 11.64846263 | 15.24768979 | 12.23625509 |
| ADO      | 84890  | 3739  | 27.49565192 | 23.18318116 | 23.67700321 | 16.7833505  |

|           |        |       |             |             |             |             |
|-----------|--------|-------|-------------|-------------|-------------|-------------|
| HMGXB3    | 22993  | 5422  | 18.96094477 | 16.80903136 | 16.99006934 | 21.76614296 |
| FBRS      | 64319  | 2811  | 36.57283619 | 35.59298308 | 31.56869433 | 46.30443219 |
| GNS       | 2799   | 5144  | 19.94592853 | 27.16098237 | 21.23526859 | 60.60273113 |
| MRFAP1L1  | 114932 | 1604  | 63.96624461 | 60.84832663 | 60.19771567 | 45.68531695 |
| SCAF1     | 58506  | 4323  | 23.7339478  | 23.09253823 | 23.60641678 | 22.94474736 |
| TGFBR1    | 7046   | 6475  | 15.84584654 | 10.42753722 | 17.88170644 | 12.41146851 |
| PAPD4     | 167153 | 3523  | 29.06541873 | 34.91445983 | 32.62529383 | 55.67799268 |
| REPIN1    | 29803  | 3310  | 30.9357916  | 67.85962121 | 27.76703057 | 38.40644288 |
| PLXND1    | 23129  | 6977  | 14.67643259 | 3.257694402 | 17.92755894 | 2.205044229 |
| PIAS1     | 8554   | 2309  | 44.34710705 | 46.61246719 | 43.00729226 | 77.06148572 |
| MAK16     | 84549  | 3590  | 28.46604012 | 21.41428307 | 26.83728445 | 11.67208207 |
| NDUFB10   | 4716   | 741   | 137.9123941 | 113.0702962 | 144.5632578 | 49.4461865  |
| WTAP      | 9589   | 2143  | 47.68692675 | 54.17444179 | 60.33890525 | 52.42558047 |
| UBE2D2    | 7322   | 2879  | 35.49603474 | 32.35292192 | 35.51991125 | 24.8202114  |
| RBAK      | 57786  | 6551  | 15.59961594 | 13.02776954 | 13.99749449 | 12.02027594 |
| UBXN1     | 51035  | 1307  | 78.18904669 | 80.30160254 | 95.05389417 | 67.37303396 |
| MARK3     | 4140   | 3546  | 28.81925663 | 22.24556413 | 29.37489773 | 29.97043233 |
| AIDA      | 64853  | 3020  | 33.83876954 | 24.1279099  | 29.38397343 | 28.01829957 |
| TNFRSF1A  | 7132   | 2258  | 45.16771384 | 67.10638867 | 46.78581961 | 136.8053343 |
| CEP250    | 11190  | 8341  | 12.22739454 | 11.54102863 | 10.79094933 | 10.45999759 |
| FBXL5     | 26234  | 3644  | 27.98811686 | 38.21910756 | 22.20693293 | 67.71700986 |
| CABIN1    | 23523  | 7528  | 13.52076404 | 11.92900796 | 12.93866565 | 10.19135747 |
| DVL3      | 1857   | 5062  | 20.10752898 | 28.17323553 | 19.61751044 | 39.86992816 |
| HIF1AN    | 55662  | 6928  | 14.6917309  | 15.374426   | 14.33369484 | 15.83666913 |
| VAMP7     | 6845   | 2664  | 38.20732421 | 58.46848597 | 40.84521475 | 42.02070616 |
| LOC100495 | 1E+08  | 11210 | 9.079778027 | 9.263160668 | 8.764265302 | 7.421789712 |
| TRIM27    | 5987   | 2969  | 34.2823549  | 27.01911974 | 33.16224277 | 18.34064134 |
| AP2S1     | 1175   | 890   | 114.1347478 | 121.1809207 | 103.5057932 | 76.42258197 |
| KLHDC3    | 116138 | 1879  | 54.06063093 | 44.23448186 | 59.933357   | 27.47171903 |
| PTTG1IP   | 754    | 2843  | 35.72983662 | 34.25180557 | 36.04400607 | 45.14241967 |
| G6PD      | 2539   | 2395  | 42.32799138 | 129.6058162 | 54.60762726 | 190.9339463 |
| PIK3CB    | 5291   | 3213  | 31.55167736 | 30.03005057 | 33.80030107 | 40.63697996 |
| COX15     | 1355   | 7689  | 13.18448945 | 15.79448734 | 11.12892812 | 12.21576179 |
| AIF1      | 199    | 1491  | 67.99164276 | 117.170238  | 55.40733849 | 114.7232657 |
| MPHOSPH   | 10198  | 3624  | 27.97338282 | 31.23592821 | 32.5322563  | 26.42076495 |
| ZC3H14    | 79882  | 4208  | 24.09114528 | 20.01681436 | 26.46080543 | 9.81356655  |
| YKT6      | 10652  | 2783  | 36.353271   | 33.54901003 | 41.14852341 | 32.73193975 |
| SCAF8     | 22828  | 5018  | 20.1616487  | 19.31690272 | 18.06320499 | 17.70949997 |
| MAD2L1    | 4085   | 1453  | 69.62914878 | 45.70140403 | 69.21648067 | 15.74291914 |
| NRBP1     | 29959  | 2212  | 45.73741102 | 48.15281343 | 46.23048124 | 54.90837151 |
| TMCO1     | 54499  | 4456  | 22.70447782 | 30.75451102 | 28.25981099 | 25.16732273 |
| KIF15     | 56992  | 4857  | 20.78788697 | 14.72705205 | 19.2274788  | 4.876297502 |
| CTSB      | 1508   | 3945  | 25.59360381 | 20.39102641 | 28.33197434 | 93.23529632 |
| RPTOR     | 57521  | 6856  | 14.72677465 | 12.51321231 | 15.65528862 | 11.36743177 |
| PREP      | 5550   | 2943  | 34.30743018 | 30.43789985 | 28.57333844 | 11.5555722  |
| OTUD5     | 55593  | 2941  | 34.26126516 | 27.88249846 | 33.26244288 | 32.21241342 |
| GTF3C2    | 2976   | 3935  | 25.60670415 | 27.18162355 | 27.49118115 | 15.43295016 |
| AGAP3     | 116988 | 3247  | 31.03245483 | 23.74502893 | 26.6139413  | 12.28164028 |
| ANKRD28   | 23243  | 6383  | 15.75403332 | 11.55532174 | 14.99482953 | 9.418983597 |
| RAC2      | 5880   | 1516  | 66.33113105 | 265.7529644 | 62.71645291 | 242.3538168 |
| DIMT1     | 27292  | 1557  | 64.58445387 | 28.19398773 | 62.96475868 | 13.00121149 |
| PYCR2     | 29920  | 1708  | 58.87470414 | 65.88437107 | 50.22342688 | 43.25909542 |
| VPS39     | 23339  | 4851  | 20.72933306 | 20.71687092 | 20.9499011  | 26.99886092 |
| GCC2      | 9648   | 6998  | 14.36953339 | 16.36696198 | 12.40897927 | 29.04238045 |
| CMIP      | 80790  | 4359  | 23.06905131 | 55.36311025 | 25.49570646 | 57.5382797  |
| TMED7     | 51014  | 4063  | 24.69938679 | 23.41854698 | 26.72910838 | 38.01457604 |
| DR1       | 1810   | 3222  | 31.14637136 | 23.51431186 | 32.98455461 | 25.69627714 |
| TOR1AIP1  | 26092  | 3824  | 26.24309846 | 40.49914119 | 31.65956283 | 60.24164384 |
| EXOC7     | 23265  | 4952  | 20.26526828 | 24.16420673 | 20.65061076 | 29.3914282  |
| NSF       | 4905   | 3983  | 25.19548293 | 26.79810595 | 20.47600248 | 32.67932686 |
| DENND4B   | 9909   | 5688  | 17.64303947 | 26.36540029 | 14.04107591 | 30.9622206  |
| VPRBP     | 9730   | 6001  | 16.72281428 | 10.99124724 | 12.85101448 | 6.577841739 |

|          |        |       |             |             |             |             |
|----------|--------|-------|-------------|-------------|-------------|-------------|
| ERGIC3   | 51614  | 1383  | 72.56226212 | 80.883592   | 73.63648227 | 53.27845706 |
| SNRPD1   | 6632   | 1614  | 62.17695695 | 51.22114377 | 68.9882709  | 25.83664546 |
| MPRIP    | 23164  | 3923  | 25.58083317 | 19.48294949 | 26.60583026 | 6.553266784 |
| FKBP5    | 2289   | 7384  | 13.59068371 | 7.212488035 | 21.11703059 | 5.702221492 |
| MXI1     | 4601   | 3470  | 28.86144736 | 17.27434934 | 29.22671051 | 24.15145512 |
| NSFL1C   | 55968  | 3574  | 28.0216067  | 24.4405183  | 29.3812329  | 18.40777293 |
| MS4A3    | 932    | 1665  | 60.14968309 | 11.10817588 | 25.50644867 | -           |
| MTRR     | 4552   | 3317  | 30.19271099 | 27.20748789 | 34.01448977 | 25.44854864 |
| FMNL1    | 752    | 3973  | 25.20745591 | 49.86112679 | 27.33460039 | 40.70995759 |
| EFHA1    | 221154 | 1947  | 51.4377105  | 52.07440758 | 48.50759544 | 39.71639735 |
| UBL5     | 59286  | 537   | 186.4976207 | 228.2271445 | 205.7764063 | 154.1776628 |
| ZBTB40   | 9923   | 8992  | 11.11486167 | 9.218611958 | 11.44302478 | 9.027354765 |
| RFX5     | 5993   | 3618  | 27.62433283 | 34.12086991 | 25.22803121 | 33.4024409  |
| CTNNA1   | 1495   | 3778  | 26.4544299  | 22.1771015  | 22.09038664 | 26.6297366  |
| PSMA5    | 5686   | 3838  | 25.98761074 | 32.86172474 | 25.37839369 | 35.65448446 |
| MAPKAP1  | 79109  | 3395  | 29.37863034 | 25.79477028 | 32.05056027 | 19.67644323 |
| FAM46C   | 54855  | 5720  | 17.43714161 | 2.610103125 | 14.70128235 | 2.017210697 |
| UTP20    | 27340  | 9029  | 11.04667737 | 8.341726375 | 11.3025296  | 2.802481766 |
| MCM8     | 84515  | 3710  | 26.88421833 | 19.09994441 | 30.01268713 | 10.74891806 |
| PRKD3    | 23683  | 5907  | 16.85052714 | 8.638680346 | 17.27620446 | 5.791514786 |
| MRPS2    | 51116  | 1510  | 65.91792307 | 38.66368437 | 60.72687843 | 10.72470797 |
| MED21    | 9412   | 1782  | 55.85637701 | 60.64750398 | 56.20032373 | 39.41796602 |
| TTYH3    | 80727  | 4838  | 20.57380402 | 37.86036934 | 18.60423901 | 57.40644894 |
| SETD1A   | 9739   | 6447  | 15.43912887 | 12.89228966 | 14.28884069 | 7.253151441 |
| SF3A2    | 8175   | 1678  | 59.31827404 | 54.57940014 | 52.63231838 | 35.58791095 |
| MYO19    | 80179  | 4418  | 22.48340373 | 17.0982979  | 19.27291961 | 7.835069164 |
| TLE3     | 7090   | 5354  | 18.55279747 | 22.55795949 | 20.91537608 | 30.24712185 |
| GLE1     | 2733   | 3350  | 29.65124707 | 29.6001626  | 30.21056737 | 20.96800461 |
| RHOT1    | 55288  | 3309  | 29.95687262 | 21.61658864 | 30.90414763 | 22.75718858 |
| COPE     | 11316  | 1134  | 87.4138373  | 92.74870123 | 100.7981093 | 83.18505303 |
| TET3     | 200424 | 10983 | 9.025520486 | 12.23419001 | 8.329809858 | 9.160260848 |
| GIT1     | 28964  | 3778  | 26.23803375 | 17.87144084 | 24.38331285 | 12.16287768 |
| ATXN7L3  | 56970  | 3656  | 27.11359177 | 23.95329461 | 26.17943022 | 30.17607503 |
| BMS1     | 9790   | 8048  | 12.31700938 | 9.912288909 | 11.31507606 | 4.879622193 |
| MGAT1    | 4245   | 3181  | 31.0980526  | 32.92403704 | 35.26947761 | 103.2189927 |
| HMG20A   | 10363  | 3898  | 25.37786181 | 21.09421772 | 22.81962148 | 18.74726001 |
| RPS6KB1  | 6198   | 5332  | 18.55268292 | 11.78522451 | 17.23722265 | 9.52919066  |
| ARID1B   | 57492  | 9648  | 10.25320329 | 10.46260429 | 10.81827033 | 9.609496189 |
| HARS     | 3035   | 1981  | 49.93584318 | 40.60706673 | 50.34144743 | 25.44411251 |
| SIKE1    | 80143  | 5519  | 17.9240633  | 15.10045735 | 19.40956224 | 14.41466627 |
| NUP93    | 9688   | 2764  | 35.78976315 | 29.50678821 | 35.46893244 | 18.2361747  |
| TRIP6    | 7205   | 1762  | 56.14239803 | 57.79485637 | 45.20678492 | 52.84748976 |
| CAMK2G   | 818    | 3818  | 25.90961376 | 26.55549281 | 27.39286456 | 13.62603923 |
| RLF      | 6018   | 6266  | 15.78724949 | 14.61606023 | 16.69102408 | 19.41585487 |
| NMD3     | 51068  | 2758  | 35.79351674 | 37.40809755 | 33.47767974 | 33.54241855 |
| TRIB3    | 57761  | 2469  | 39.98319934 | 24.81935533 | 33.97328889 | 22.54675468 |
| PILRB    | 29990  | 3705  | 26.64467454 | 29.53059331 | 23.95130898 | 19.45065458 |
| SNX2     | 6643   | 2091  | 47.21115216 | 52.53778746 | 56.18093128 | 137.5664344 |
| RAPGEF6  | 51735  | 8395  | 11.75920419 | 12.66124963 | 12.8104757  | 11.50191395 |
| SERPINH1 | 871    | 2333  | 42.31398164 | 25.40655557 | 34.23302177 | 22.9066523  |
| C19orf48 | 84798  | 1692  | 58.34427847 | 48.20139634 | 53.57042708 | 16.03160026 |
| CEP290   | 80184  | 7972  | 12.38315594 | 8.022200266 | 10.07127563 | 3.123275231 |
| SNX14    | 57231  | 3505  | 28.10674265 | 32.48716174 | 31.04469389 | 35.05686728 |
| MGRN1    | 23295  | 6471  | 15.22394267 | 17.4932783  | 14.98681896 | 20.7089951  |
| TNKS     | 8658   | 9599  | 10.26295791 | 7.939241398 | 8.100092945 | 7.739492937 |
| SPTLC1   | 10558  | 2780  | 35.43673849 | 34.30661477 | 39.06488034 | 38.22847232 |
| CYC1     | 1537   | 1235  | 79.76852874 | 81.19409565 | 79.55256197 | 37.86321242 |
| WDR33    | 55339  | 6315  | 15.60002106 | 14.29093228 | 18.83663035 | 11.98866108 |
| PSME2    | 5721   | 829   | 118.5883556 | 291.375911  | 92.51672904 | 417.7994988 |
| GNG5     | 2787   | 823   | 119.4529123 | 138.3566244 | 127.8491023 | 181.2759077 |
| EPS15    | 2060   | 5220  | 18.83328483 | 16.3496012  | 16.79754329 | 21.52260899 |
| GCFC1    | 94104  | 4028  | 24.40659057 | 23.7326767  | 25.65001199 | 15.0263729  |

|          |        |      |             |             |             |             |
|----------|--------|------|-------------|-------------|-------------|-------------|
| ABI2     | 10152  | 6489 | 15.15021526 | 6.009511455 | 9.279728308 | 4.585767122 |
| IKBKAP   | 8518   | 6129 | 16.04009575 | 9.670989418 | 15.34046644 | 4.723009855 |
| SSR4     | 6748   | 948  | 103.7022646 | 149.0252343 | 91.37843055 | 121.2864917 |
| TADA3    | 10474  | 2571 | 38.2379412  | 49.74949865 | 39.11767655 | 49.91828048 |
| MKI67IP  | 84365  | 1754 | 56.04888645 | 51.07111703 | 59.14527812 | 26.54426367 |
| AFG3L2   | 10939  | 3223 | 30.50255874 | 25.30461142 | 28.77878071 | 12.81274838 |
| UPF2     | 26019  | 5223 | 18.78333537 | 16.51086521 | 19.86230477 | 21.23894637 |
| CLK3     | 1198   | 2713 | 36.16120924 | 37.1250916  | 35.20114712 | 40.59023275 |
| MSMO1    | 6307   | 2214 | 44.31136435 | 42.47307722 | 26.14815927 | 53.94445761 |
| RDH11    | 51109  | 2587 | 37.92244324 | 36.60761153 | 30.46355469 | 47.80983195 |
| CREB1    | 1385   | 9794 | 10.01688387 | 10.62516477 | 10.74329295 | 15.41882089 |
| GPATCH8  | 23131  | 7054 | 13.87878856 | 18.89055082 | 14.55690304 | 22.75674629 |
| POLR2D   | 5433   | 2338 | 41.87381287 | 27.54433101 | 41.66051112 | 13.16047355 |
| DARS2    | 55157  | 3348 | 29.24162918 | 22.49625073 | 27.76741189 | 7.557827918 |
| ACSL5    | 51703  | 3399 | 28.8028757  | 74.40867819 | 33.38038154 | 66.16606847 |
| CUL5     | 8065   | 6408 | 15.27792985 | 13.90965573 | 14.7055249  | 11.62512821 |
| KIAA0430 | 9665   | 7760 | 12.61610496 | 16.25300252 | 12.44292989 | 33.33815552 |
| CSK      | 1445   | 2755 | 35.53574392 | 77.56680387 | 43.40732302 | 97.79775557 |
| SUMO3    | 6612   | 1831 | 53.46858246 | 42.22989711 | 53.6577903  | 29.18690323 |
| RALB     | 5899   | 2275 | 42.94355531 | 55.92855516 | 40.02801413 | 53.83273059 |
| RRP12    | 23223  | 4449 | 21.95922417 | 27.0965346  | 22.27299462 | 31.7134002  |
| MGAT2    | 4247   | 2728 | 35.81253238 | 37.81947692 | 31.44487284 | 27.01030283 |
| YTHDF3   | 253943 | 5156 | 18.94813583 | 20.0532129  | 19.21888151 | 24.42023909 |
| GTF2H1   | 2965   | 3515 | 27.79419298 | 21.36404403 | 28.85254209 | 18.54398119 |
| LSM4     | 25804  | 1167 | 83.71601399 | 71.41338825 | 82.55856999 | 32.61064802 |
| DCAF11   | 80344  | 4311 | 22.66216384 | 22.63992482 | 21.51565999 | 20.70775425 |
| CNOT2    | 4848   | 3639 | 26.84709764 | 33.49532249 | 30.1918318  | 29.98328033 |
| CHMP4B   | 128866 | 1664 | 58.5890638  | 84.09791227 | 61.58239739 | 118.8539658 |
| NUCB1    | 4924   | 2585 | 37.71458497 | 53.96257665 | 39.64143492 | 56.30419825 |
| TMEM97   | 27346  | 2585 | 37.71458497 | 34.13607085 | 41.4396031  | 8.144139941 |
| RBM8A    | 9939   | 4973 | 19.60430367 | 19.62612425 | 21.28567574 | 12.08955807 |
| TRMT112  | 51504  | 612  | 159.3009839 | 129.9857328 | 141.2017441 | 70.12241658 |
| ARFGEF2  | 10564  | 9004 | 10.80495513 | 10.5179799  | 9.62091872  | 10.97126667 |
| DPF2     | 5977   | 2545 | 38.22703968 | 30.82008056 | 34.78519254 | 35.31568375 |
| MICU1    | 10367  | 2506 | 38.82195371 | 37.79085835 | 36.33828098 | 41.84283759 |
| CXCR4    | 7852   | 1912 | 50.88274895 | 43.82065348 | 40.66568629 | 92.00349472 |
| IDS      | 3423   | 5876 | 16.55681007 | 8.987635515 | 17.40330573 | 16.26045325 |
| PHF21A   | 51317  | 7332 | 13.24105699 | 11.33614176 | 12.67939103 | 18.02864805 |
| AIFM1    | 9131   | 2492 | 38.95803765 | 34.873494   | 42.47739384 | 19.49555662 |
| ARFGAP2  | 84364  | 2803 | 34.635544   | 35.29707885 | 30.07585436 | 25.27652588 |
| RNF219   | 79596  | 3552 | 27.33204668 | 23.39994127 | 22.96056247 | 19.88954763 |
| JUP      | 3728   | 3508 | 27.67486597 | 18.35765276 | 39.45026188 | 70.34229873 |
| TTC19    | 54902  | 3642 | 26.65662543 | 22.39339995 | 22.79926173 | 18.50873459 |
| MEGF6    | 1953   | 7450 | 13.03133286 | 2.542386336 | 20.98667428 | 0.380403232 |
| DTL      | 51514  | 4428 | 21.92489382 | 21.28686216 | 23.95324079 | 10.42316639 |
| NDUFS2   | 4720   | 2082 | 46.62988944 | 55.22654435 | 55.30749037 | 44.53046073 |
| FES      | 2242   | 2783 | 34.81101101 | 59.01102718 | 37.04885503 | 29.67695871 |
| NXF3     | 56000  | 1915 | 50.58957893 | 81.33683897 | 78.7766682  | 79.06881958 |
| MORC2    | 22880  | 4467 | 21.68771964 | 13.61838436 | 19.86559207 | 7.386591597 |
| CBLL1    | 79872  | 4339 | 22.32750487 | 21.51806751 | 19.9646813  | 18.61468456 |
| TNRC6A   | 27327  | 8438 | 11.48128036 | 9.13724922  | 13.07070934 | 13.69837411 |
| TMEM87A  | 25963  | 3023 | 32.04731844 | 36.85621646 | 31.10212332 | 34.08411884 |
| DIP2B    | 57609  | 8715 | 11.11635613 | 8.770121729 | 10.42483619 | 25.31812514 |
| KAT2A    | 2648   | 3127 | 30.91610409 | 24.08616803 | 27.16228784 | 11.26403011 |
| KIAA1715 | 80856  | 5765 | 16.76923807 | 17.39370479 | 14.65982733 | 12.60571757 |
| CTSH     | 1512   | 1494 | 64.70860608 | 16.55584204 | 41.29528134 | 22.76308499 |
| TWISTNB  | 221830 | 3892 | 24.83932618 | 13.96998332 | 23.50624401 | 7.437648356 |
| BICD2    | 23299  | 6433 | 15.02792748 | 12.36612287 | 15.40378565 | 7.929748712 |
| RYBP     | 23429  | 4678 | 20.62211871 | 11.43220272 | 18.7437315  | 21.67953406 |
| EI24     | 9538   | 2279 | 42.33008834 | 35.98175866 | 55.6256502  | 26.55824047 |
| KLHDC10  | 23008  | 6438 | 14.98450937 | 12.35651886 | 12.50380461 | 10.21891588 |
| STX16    | 8675   | 4978 | 19.37932329 | 19.15877643 | 19.90609744 | 35.21562783 |

|          |        |       |             |             |             |             |
|----------|--------|-------|-------------|-------------|-------------|-------------|
| GALNT2   | 2590   | 4463  | 21.56977037 | 15.57781708 | 22.39249207 | 13.87928122 |
| PDHB     | 5162   | 1614  | 59.64429067 | 44.73221181 | 59.69383592 | 26.21290728 |
| TOMM40   | 10452  | 1819  | 52.92242174 | 39.69092351 | 61.21334208 | 16.24772622 |
| DENND1A  | 57706  | 5041  | 19.09658503 | 16.62072792 | 11.9452801  | 15.78150033 |
| PPP2R4   | 5524   | 2869  | 33.55381148 | 30.2132849  | 35.20185289 | 39.44152471 |
| AZI2     | 64343  | 3415  | 28.18913182 | 17.42205764 | 24.19102246 | 40.07083788 |
| ADSS     | 159    | 2791  | 34.49153893 | 28.74230258 | 36.63985113 | 18.78505034 |
| LRP5     | 4041   | 5161  | 18.61296241 | 11.65759056 | 16.4983063  | 3.451606266 |
| NSRP1    | 84081  | 2542  | 37.78973209 | 39.71015192 | 35.98989051 | 32.25164811 |
| MAP2K7   | 5609   | 3386  | 28.37020053 | 23.09931256 | 28.32938029 | 20.14723178 |
| HERC4    | 26091  | 4531  | 21.20094879 | 21.49147721 | 20.5176109  | 28.28017441 |
| FAM178A  | 55719  | 7291  | 13.17535304 | 13.47815306 | 12.63477657 | 10.63369284 |
| DNAJC9   | 23234  | 1450  | 66.10835366 | 61.47108545 | 78.83107303 | 32.24901196 |
| TIMMDC1  | 51300  | 1596  | 60.06084763 | 45.37632991 | 50.4382795  | 32.2161223  |
| AKAP13   | 11214  | 13302 | 7.206218073 | 17.63966449 | 7.433563999 | 35.67082054 |
| POU2F1   | 5451   | 14038 | 6.813842901 | 7.222458438 | 7.570610839 | 9.156740845 |
| SARS     | 6301   | 3192  | 29.96639306 | 22.408926   | 30.71307308 | 16.93248948 |
| ZNF480   | 147657 | 4742  | 20.171389   | 14.1443775  | 22.45624625 | 11.31245227 |
| LENG8    | 114823 | 3970  | 24.0938858  | 26.82972879 | 24.85390014 | 22.7923682  |
| WBP2     | 23558  | 1944  | 49.20407749 | 79.43572558 | 50.2127365  | 119.8537146 |
| RPRD1A   | 55197  | 4283  | 22.33311386 | 12.43451124 | 19.88040131 | 8.460136929 |
| MPHOSPH  | 10199  | 2488  | 38.3634809  | 23.37593678 | 41.86631324 | 16.76058914 |
| C15orf39 | 56905  | 4443  | 21.48285854 | 30.04203875 | 22.68350915 | 46.74589543 |
| ATP6AP2  | 10159  | 2044  | 46.69683976 | 56.90736861 | 48.06624953 | 48.62650279 |
| GAS5     | 60674  | 651   | 146.6180345 | 143.7630224 | 147.9966992 | 88.62093079 |
| EGR1     | 1958   | 3136  | 30.43633306 | 29.77260679 | 27.62332658 | 17.94490558 |
| ZNF266   | 10781  | 3618  | 26.32502883 | 28.94730841 | 26.45439384 | 28.1430951  |
| DMTF1    | 9988   | 4052  | 23.50541814 | 23.04217545 | 24.97665368 | 26.12791099 |
| ATF7IP   | 55729  | 4661  | 20.43423178 | 17.7367359  | 11.9672124  | 13.98457281 |
| SLC43A1  | 8501   | 2555  | 37.27747722 | 30.35059659 | 28.44695026 | 10.77507842 |
| HN1L     | 90861  | 3705  | 25.6517053  | 21.77204639 | 25.66211676 | 8.031590514 |
| RNF6     | 6049   | 3584  | 26.51773665 | 44.64114611 | 28.76868402 | 49.13870278 |
| HNRNPUL2 | 221092 | 5156  | 18.43280996 | 20.22608543 | 16.80115441 | 12.21011955 |
| DNAJB1   | 3337   | 2233  | 42.56138296 | 52.48992036 | 43.43023084 | 49.85932585 |
| VRK1     | 7443   | 1720  | 55.1367337  | 39.38438149 | 57.24342953 | 25.18591667 |
| SERINC3  | 10955  | 2592  | 36.58764737 | 42.72679179 | 44.0991728  | 52.40345951 |
| PDPK1    | 5170   | 7254  | 13.07350179 | 17.81678483 | 11.65066233 | 19.56198414 |
| GNAQ     | 2776   | 2215  | 42.81498057 | 46.67917188 | 46.3586429  | 37.83546242 |
| XPNPEP1  | 7511   | 2557  | 37.08845599 | 52.98485425 | 39.57974216 | 53.59575292 |
| POLD3    | 10714  | 3430  | 27.6487411  | 21.50367891 | 23.59243837 | 14.34117017 |
| MRPL19   | 9801   | 7827  | 12.09030226 | 8.284695447 | 12.60636049 | 4.344966012 |
| HDAC3    | 8841   | 1965  | 48.1581658  | 37.08208036 | 48.60087132 | 25.65129103 |
| GNA13    | 10672  | 6311  | 14.99458023 | 16.10072956 | 16.53853147 | 32.84537406 |
| IDI1     | 3422   | 2150  | 44.01432363 | 40.31716947 | 31.7418502  | 37.37872493 |
| RELA     | 5970   | 2595  | 36.46658798 | 48.60242758 | 36.72039591 | 54.05903739 |
| POGK     | 57645  | 3852  | 24.56666558 | 23.89145867 | 22.15966864 | 14.97721338 |
| ZZZ3     | 26009  | 4344  | 21.78425318 | 15.44029422 | 18.23936131 | 8.900532418 |
| SLC5A6   | 8884   | 3357  | 28.12821258 | 18.51960651 | 29.64406393 | 6.994860918 |
| YWHAH    | 7533   | 1807  | 52.25589908 | 30.95240945 | 48.99187328 | 16.01955031 |
| PRPF3    | 9129   | 2480  | 38.07516518 | 43.12890672 | 39.01952448 | 47.99523041 |
| SATB2    | 23314  | 5730  | 16.4793036  | 13.88329292 | 17.10927212 | 6.676972967 |
| PFAS     | 5198   | 5400  | 17.48637215 | 10.81151174 | 18.03745833 | 2.624077853 |
| SRSF9    | 8683   | 1204  | 78.42725053 | 75.32633114 | 93.18289724 | 77.50806131 |
| ASPH     | 444    | 5349  | 17.65309584 | 8.706679961 | 15.60244545 | 4.957596008 |
| DOCK11   | 139818 | 6638  | 14.2251295  | 19.90656554 | 19.22506717 | 22.71911764 |
| WBSCR22  | 114049 | 1435  | 65.80237605 | 39.90801392 | 60.51431144 | 21.30087687 |
| SLC30A5  | 64924  | 4072  | 23.1390038  | 21.77981545 | 23.40113639 | 15.55997891 |
| MRPS15   | 64960  | 965   | 97.63940256 | 107.3753351 | 94.36656181 | 45.52027281 |
| WDR34    | 89891  | 1818  | 51.82729564 | 39.46761523 | 51.01980761 | 10.02123084 |
| CYBA     | 1535   | 743   | 126.8129522 | 382.3844859 | 138.7711488 | 357.1793262 |
| TOPORS   | 10210  | 4183  | 22.52498768 | 17.79252133 | 22.37608159 | 16.50208995 |
| CLTA     | 1211   | 1246  | 75.45556766 | 92.995984   | 80.54595638 | 84.80567132 |

|          |       |       |             |             |             |             |
|----------|-------|-------|-------------|-------------|-------------|-------------|
| KIAA0182 | 23199 | 7395  | 12.71367644 | 39.50421226 | 15.65707224 | 25.07435273 |
| DCAF8    | 50717 | 4201  | 22.37982321 | 22.43709251 | 22.17961908 | 15.61222366 |
| C12orf24 | 29902 | 1529  | 61.48962544 | 43.42978421 | 56.93219207 | 12.18015395 |
| C20orf30 | 29058 | 1792  | 52.46519939 | 43.77070593 | 51.64214591 | 34.56653575 |
| SUPT5H   | 6829  | 3798  | 24.75451219 | 25.75659521 | 24.75558684 | 32.99196055 |
| FUT4     | 2526  | 6063  | 15.50678497 | 23.338076   | 16.44836011 | 24.8069677  |
| LARP7    | 51574 | 2303  | 40.82398493 | 36.57436163 | 39.44960807 | 43.59735824 |
| ISCU     | 23479 | 1189  | 78.90096815 | 45.54107855 | 81.03099342 | 29.96423876 |
| MAFG     | 4097  | 5043  | 18.60266729 | 18.29322457 | 18.60210867 | 26.5730532  |
| NDUFV2   | 4729  | 937   | 100.1208657 | 76.81425525 | 104.1766913 | 58.54666154 |
| NHP2     | 55651 | 867   | 108.2044419 | 82.24505089 | 108.9322818 | 26.61694392 |
| VPS29    | 51699 | 1107  | 84.56085363 | 91.7901574  | 84.74293952 | 89.6026584  |
| TEX10    | 54881 | 3129  | 29.91654361 | 20.01150029 | 27.82017312 | 10.6745805  |
| NR3C1    | 2908  | 7286  | 12.84777175 | 14.55783117 | 16.93525949 | 24.19922312 |
| CEP85    | 64793 | 3961  | 23.63263443 | 19.68983581 | 25.07039582 | 14.3606439  |
| ARL8B    | 55207 | 3008  | 31.11996841 | 39.70688797 | 40.38854315 | 73.62273141 |
| BRD3     | 8019  | 5673  | 16.50076943 | 17.71506096 | 17.54188659 | 12.70309805 |
| GADD45G  | 90480 | 744   | 125.8183669 | 67.08941046 | 113.0259879 | 32.3777348  |
| NISCH    | 11188 | 5252  | 17.8234701  | 10.22518603 | 15.24693918 | 8.787848582 |
| CDCA8    | 55143 | 2319  | 40.36604785 | 31.22924646 | 34.16635856 | 10.73684784 |
| UBE4B    | 10277 | 5890  | 15.89284634 | 16.38141808 | 18.72506714 | 14.77833804 |
| H2AFX    | 3014  | 1651  | 56.69828284 | 61.00567747 | 57.97213622 | 26.85155723 |
| IDH1     | 3417  | 2339  | 40.02089139 | 69.45063154 | 32.88056996 | 66.3800504  |
| SLC4A7   | 9497  | 7757  | 12.04131479 | 8.330730769 | 10.15975454 | 5.088775078 |
| PTPRJ    | 5795  | 7854  | 11.8925998  | 17.44870144 | 23.96927965 | 83.40460918 |
| ANXA7    | 310   | 2212  | 42.22625624 | 37.57531257 | 48.90497189 | 34.77530195 |
| GBAS     | 2631  | 2019  | 46.26274334 | 51.32104923 | 42.17323369 | 27.07072462 |
| GPR107   | 57720 | 7096  | 13.16297615 | 12.27840752 | 11.93985193 | 18.28592181 |
| CREG1    | 8804  | 2048  | 45.60765566 | 117.2918136 | 42.71088438 | 281.6014798 |
| MTMR12   | 54545 | 5187  | 18.00741831 | 9.923722802 | 16.66000914 | 9.05407677  |
| SNTB1    | 6641  | 4975  | 18.73368696 | 16.97559548 | 13.7175835  | 21.5652859  |
| ARID4A   | 5926  | 5792  | 16.09117621 | 20.96750918 | 20.93878678 | 30.37131939 |
| RNF138   | 51444 | 3585  | 25.99723644 | 17.52826139 | 24.87089799 | 20.60991213 |
| RANBP6   | 26953 | 4606  | 20.23449688 | 15.57796884 | 19.08260111 | 12.12991016 |
| FURIN    | 5045  | 4180  | 22.29667288 | 22.76305177 | 26.1831355  | 35.40083704 |
| ANXA5    | 308   | 1624  | 57.3892196  | 72.1736405  | 69.99458227 | 169.5217079 |
| IMPDH1   | 3614  | 2625  | 35.50479719 | 25.72125847 | 45.87897675 | 16.11719328 |
| SLC38A5  | 92745 | 2006  | 46.46066432 | 34.21359267 | 44.55306782 | 37.43823936 |
| EIF2B5   | 8893  | 2898  | 32.08961576 | 25.60499794 | 29.60028058 | 14.66875819 |
| MOGS     | 7841  | 2910  | 31.95728744 | 24.04448901 | 38.9170557  | 21.84283951 |
| ZC3H7A   | 29066 | 3817  | 24.36355946 | 20.95806493 | 20.86831413 | 17.81925542 |
| PHF6     | 84295 | 4772  | 19.48778425 | 16.99729615 | 19.83561884 | 13.40476125 |
| DCAF13   | 25879 | 2657  | 35.00026589 | 21.72136445 | 31.88753832 | 9.447188185 |
| MRPS5    | 64969 | 1678  | 55.42056404 | 46.87719768 | 54.39512331 | 24.24803424 |
| CTDNEP1  | 23399 | 1780  | 52.24477891 | 64.34606739 | 55.55127434 | 50.60721574 |
| ATR      | 545   | 8258  | 11.26128681 | 10.25386537 | 9.671305376 | 6.226317654 |
| ZNF451   | 26036 | 5241  | 17.74388599 | 15.00857426 | 13.66638697 | 13.4411838  |
| PRCC     | 5546  | 2142  | 43.41536249 | 35.89041841 | 41.03382854 | 28.54039058 |
| SMEK1    | 55671 | 3894  | 23.8293067  | 27.52504401 | 29.29988987 | 29.21546507 |
| CYB5R3   | 1727  | 3167  | 29.29943805 | 28.35540636 | 31.28909159 | 16.81048025 |
| PWP1     | 11137 | 1853  | 50.07626567 | 28.01943634 | 43.7848615  | 14.42018883 |
| KIAA1109 | 84162 | 15592 | 5.951213462 | 7.402984267 | 5.257727515 | 15.18995444 |
| VTA1     | 51534 | 3273  | 28.35054088 | 30.16036643 | 29.30744933 | 27.02762393 |
| RNPEP    | 6051  | 2430  | 38.10161898 | 66.39130196 | 41.64831304 | 46.90018512 |
| ATP5L    | 10632 | 1396  | 66.32301871 | 75.9801991  | 72.64805548 | 54.52238716 |
| SETD7    | 80854 | 7012  | 13.20406933 | 4.004124113 | 9.792861871 | 3.435401411 |
| ORAI2    | 80228 | 10769 | 8.597542402 | 14.75343154 | 11.30095854 | 19.06053181 |
| UQCRFS1  | 7386  | 1224  | 75.64292004 | 66.63134201 | 70.77349033 | 47.96108681 |
| UPF3B    | 65109 | 2404  | 38.42868051 | 44.58507544 | 37.61642174 | 35.28190249 |
| RBM28    | 55131 | 2823  | 32.724955   | 24.39082522 | 33.30560354 | 10.97117111 |
| PPFIA1   | 8500  | 5227  | 17.67410521 | 16.62612341 | 19.847105   | 15.95574738 |
| STAT3    | 6774  | 4978  | 18.55816552 | 19.5616479  | 23.38648122 | 45.86977851 |



|          |        |       |             |             |             |             |
|----------|--------|-------|-------------|-------------|-------------|-------------|
| PTPN9    | 5780   | 3956  | 23.35251465 | 25.1785162  | 20.08166589 | 30.24152124 |
| CMAS     | 55907  | 1741  | 52.94552659 | 49.02063082 | 52.54813422 | 53.01985153 |
| TAF9B    | 51616  | 2714  | 33.96395055 | 19.04833562 | 33.47547803 | 8.204559663 |
| METAP1   | 23173  | 2835  | 32.51434278 | 24.83778779 | 32.04671865 | 11.2103462  |
| CSNK1G1  | 53944  | 8163  | 11.29219182 | 9.554261872 | 10.35328979 | 10.48969852 |
| PRR14L   | 253143 | 10844 | 8.48153593  | 10.58270312 | 10.05375663 | 13.5525041  |
| UNC93B1  | 81622  | 2334  | 39.40607353 | 50.60039542 | 37.92986933 | 187.1643043 |
| RNMT     | 8731   | 6203  | 14.82730544 | 9.447847185 | 13.28406528 | 8.223774539 |
| DHX38    | 9785   | 4470  | 20.53006475 | 17.29819723 | 19.56865575 | 12.22724676 |
| IDH3B    | 3420   | 1645  | 55.78686289 | 42.94100976 | 60.36707467 | 24.85752603 |
| GUF1     | 60558  | 4230  | 21.69489112 | 16.80463982 | 20.0795447  | 8.326861029 |
| CDC16    | 8881   | 2317  | 39.60698725 | 39.33472942 | 37.56984104 | 24.46270247 |
| SWAP70   | 23075  | 4848  | 18.88717064 | 13.97300663 | 22.18315667 | 16.45152063 |
| LPCAT2   | 54947  | 5395  | 16.97219709 | 45.6404294  | 27.41414883 | 48.36530201 |
| VBP1     | 7411   | 1643  | 55.73037327 | 44.21391067 | 51.43877331 | 31.17133434 |
| DEGS1    | 8560   | 2058  | 44.49222706 | 65.07407363 | 43.52999943 | 110.4604534 |
| C1orf96  | 126731 | 5121  | 17.88029746 | 10.05162081 | 14.60550782 | 7.075720849 |
| ANKIB1   | 54467  | 6081  | 15.05755686 | 14.84085468 | 12.75144013 | 27.62965898 |
| PRR12    | 57479  | 6960  | 13.15589128 | 13.95905899 | 12.02137435 | 10.58679686 |
| CLASP2   | 23122  | 7155  | 12.76877947 | 14.51293237 | 13.96753209 | 14.37230781 |
| WAS      | 7454   | 1844  | 49.54480321 | 115.7666551 | 58.32101059 | 166.5317707 |
| CDC23    | 8697   | 3169  | 28.82947842 | 23.90757741 | 28.00239816 | 15.39455853 |
| POLA1    | 5422   | 5455  | 16.7480508  | 12.78581674 | 14.25349078 | 5.751874199 |
| ADRM1    | 11047  | 1410  | 64.64980918 | 65.90158123 | 72.07657462 | 64.74852283 |
| PRKCA    | 5578   | 8787  | 10.37398782 | 11.9696173  | 12.76797636 | 10.3207159  |
| PTPRCAP  | 5790   | 917   | 99.40701303 | 58.0774391  | 134.7890789 | 53.2010425  |
| GGNBP2   | 79893  | 2869  | 31.77282361 | 28.58223353 | 32.6979554  | 30.12796252 |
| SEC23B   | 10483  | 3447  | 26.44509166 | 25.92280435 | 28.13452436 | 27.54254039 |
| POLDIP3  | 84271  | 3435  | 26.53747626 | 22.64006025 | 23.12753137 | 19.32945183 |
| UBN2     | 254048 | 14461 | 6.289457491 | 5.239133726 | 5.990370801 | 5.641299479 |
| UBFD1    | 56061  | 4931  | 18.4449087  | 12.38210416 | 20.13868137 | 11.82306074 |
| MED17    | 9440   | 3497  | 26.0085344  | 17.33213905 | 24.77173353 | 15.86088317 |
| ADCK3    | 56997  | 2932  | 31.02041091 | 17.40405348 | 24.71714637 | 11.39180163 |
| HBS1L    | 10767  | 7163  | 12.69745146 | 8.399389206 | 11.50370752 | 5.397726208 |
| MLXIP    | 22877  | 5400  | 16.84293422 | 16.21726761 | 16.82452729 | 9.746574883 |
| POLR2E   | 5434   | 2866  | 31.73476789 | 25.19113393 | 28.16147203 | 13.91433566 |
| DDX10    | 1662   | 3204  | 28.38696778 | 16.96977999 | 28.9494414  | 6.886624863 |
| SEC24B   | 10427  | 4649  | 19.56374377 | 14.76284511 | 19.58781074 | 18.11366035 |
| PPP4R2   | 151987 | 1495  | 60.83735437 | 53.36060277 | 56.95502263 | 71.35786674 |
| PGRMC2   | 10424  | 3790  | 23.94392048 | 15.52185456 | 23.74863017 | 8.652632137 |
| MLST8    | 64223  | 1931  | 46.99505884 | 31.73432848 | 42.01623426 | 11.63625261 |
| FYB      | 2533   | 4876  | 18.61104565 | 55.89097076 | 35.57522335 | 147.1304123 |
| ADI1     | 55256  | 1685  | 53.85605852 | 36.36735211 | 65.83056363 | 30.63463505 |
| AMPD2    | 271    | 3932  | 23.07921124 | 24.42545451 | 21.01025984 | 21.82854473 |
| ACAT1    | 38     | 2149  | 42.13265353 | 58.89667982 | 43.9480169  | 18.08578022 |
| UFM1     | 51569  | 2618  | 34.58482523 | 36.94017768 | 36.55920431 | 33.94433569 |
| TP53BP2  | 7159   | 4802  | 18.85528372 | 16.8911073  | 23.45164053 | 20.74031665 |
| CDC7     | 8317   | 3316  | 27.30490725 | 16.46381416 | 23.44776604 | 4.700549592 |
| NAT8L    | 339983 | 5894  | 15.36190574 | 25.10364823 | 13.0843125  | 2.884971919 |
| SCMH1    | 22955  | 3364  | 26.91530096 | 21.52812798 | 23.23881145 | 10.04923309 |
| ANKFY1   | 51479  | 7959  | 11.37618701 | 15.48265795 | 10.59211205 | 32.2756913  |
| C11orf84 | 144097 | 2004  | 45.18117387 | 28.91042816 | 48.28763508 | 23.03082872 |
| UNC13D   | 201294 | 4406  | 20.54994835 | 41.21848345 | 24.74419811 | 45.89796507 |
| CD59     | 966    | 7801  | 11.60659819 | 14.9393019  | 7.096091203 | 12.06632756 |
| RASA1    | 5921   | 4307  | 20.9748517  | 23.64396028 | 20.35829486 | 25.75598256 |
| AGFG1    | 3267   | 8750  | 10.32442129 | 10.82330183 | 11.10754174 | 14.59801286 |
| RNF169   | 254225 | 7840  | 11.52279162 | 8.498338359 | 10.72593559 | 9.501762955 |
| MAU2     | 23383  | 4853  | 18.57290338 | 21.81032871 | 20.15760241 | 38.66712466 |
| CLN6     | 54982  | 2258  | 39.91775913 | 40.8559484  | 57.07869992 | 20.44011548 |
| REEP5    | 7905   | 3116  | 28.92628373 | 21.88279895 | 30.91972117 | 17.47540569 |
| PPP6C    | 5537   | 4367  | 20.63986721 | 19.74725189 | 24.67488626 | 18.81981185 |
| TERF2IP  | 54386  | 2196  | 41.04476325 | 36.32700416 | 34.05956536 | 34.84431248 |

|          |        |       |             |             |             |             |
|----------|--------|-------|-------------|-------------|-------------|-------------|
| AKAP8L   | 26993  | 2136  | 42.19770604 | 35.88691177 | 38.8740221  | 40.75112878 |
| SCYL2    | 55681  | 3818  | 23.60772659 | 32.56695602 | 27.83557752 | 47.6646275  |
| LRR8D    | 55144  | 3795  | 23.75080372 | 18.43727616 | 20.82226634 | 16.64237292 |
| FAF1     | 11124  | 2610  | 34.5342146  | 32.95533192 | 29.06177369 | 15.74446712 |
| STAB1    | 23166  | 7965  | 11.31629631 | 0.111905931 | 17.53411516 | 1.042006702 |
| ARID4B   | 51742  | 6067  | 14.82279775 | 21.92700062 | 15.39275829 | 47.07880759 |
| HIAT1    | 64645  | 2664  | 33.7574752  | 29.86158726 | 34.10377154 | 50.15129488 |
| USPL1    | 10208  | 3905  | 23.02942739 | 15.69244259 | 18.50432481 | 29.70339013 |
| GOSR1    | 9527   | 5246  | 17.14256842 | 18.73221768 | 16.311538   | 21.60887595 |
| SNAPC3   | 6619   | 3095  | 29.056515   | 19.15137129 | 23.27887031 | 14.32372245 |
| UBR1     | 197131 | 7758  | 11.59189404 | 9.449852189 | 9.668225095 | 13.82924689 |
| UNG      | 7374   | 2166  | 41.42452806 | 29.3200901  | 42.92026547 | 7.289682045 |
| C10orf46 | 143384 | 6758  | 13.27693515 | 12.26601934 | 18.63357765 | 17.10371127 |
| MRTO4    | 51154  | 2273  | 39.47449528 | 20.19513113 | 40.1561887  | 6.323118904 |
| SNRPD2   | 6633   | 882   | 101.7296233 | 86.40451041 | 94.14389027 | 46.36125886 |
| UXS1     | 80146  | 2132  | 42.08514436 | 38.98526802 | 39.34336316 | 39.68821047 |
| SMNDC1   | 10285  | 2043  | 43.9185158  | 38.39310085 | 47.46926357 | 34.2831065  |
| KIAA1310 | 55683  | 5309  | 16.90064565 | 24.38609716 | 15.83939255 | 25.47042389 |
| ST8SIA4  | 7903   | 6330  | 14.17464894 | 10.34957493 | 12.38335647 | 21.33018193 |
| ABLIM1   | 3983   | 7704  | 11.64661575 | 9.51608947  | 18.04586877 | 8.119226201 |
| USP16    | 10600  | 3052  | 29.39892784 | 22.19565405 | 28.52205822 | 19.96431447 |
| CSNK1D   | 1453   | 3778  | 23.74947797 | 36.3326982  | 23.60036244 | 42.81118621 |
| UHRF1BP1 | 23074  | 5195  | 17.23217355 | 10.42316504 | 16.18697498 | 10.83257438 |
| NEIL3    | 55247  | 2402  | 37.26941782 | 20.87316989 | 33.953338   | 6.320634772 |
| PHC3     | 80012  | 12687 | 7.0561316   | 9.343973223 | 7.22768081  | 9.716968357 |
| TNF      | 7124   | 1669  | 53.63759233 | 15.62098509 | 34.56005983 | 16.85896462 |
| APH1A    | 51107  | 2213  | 40.36003409 | 47.22482112 | 41.91324457 | 49.94403939 |
| IST1     | 9798   | 2377  | 37.57541247 | 45.74772829 | 35.37708667 | 62.59369553 |
| RANBP3   | 8498   | 3415  | 26.15424757 | 20.7498664  | 26.10898076 | 18.84989119 |
| RALGAPB  | 57148  | 8636  | 10.34237557 | 10.86296437 | 11.79241026 | 10.07925093 |
| RBM15B   | 29890  | 6650  | 13.43109104 | 11.05786255 | 12.8359464  | 6.788216006 |
| C4orf14  | 84273  | 2307  | 38.71554202 | 34.5791509  | 34.61882956 | 15.61869857 |
| BAG3     | 9531   | 2608  | 34.16885325 | 31.44264877 | 31.352455   | 35.5492405  |
| HIATL1   | 84641  | 3312  | 26.9059086  | 33.64019999 | 29.72786799 | 37.83317215 |
| PSMB3    | 5691   | 784   | 113.6637363 | 100.9000039 | 116.9612072 | 75.39442345 |
| NBEAL2   | 23218  | 8843  | 10.07716491 | 27.01307679 | 9.198759824 | 39.37324938 |
| BTG1     | 694    | 4704  | 18.94395605 | 20.8431933  | 21.6045855  | 23.41014061 |
| CLPB     | 81570  | 3131  | 28.46131245 | 33.80566121 | 25.710474   | 13.31853905 |
| RNASEH2B | 79621  | 1691  | 52.69803032 | 46.64859278 | 50.72833419 | 24.54045944 |
| PHF15    | 23338  | 6463  | 13.75645723 | 11.44676641 | 11.89968329 | 23.89806938 |
| TRIM44   | 54765  | 4337  | 20.49988082 | 20.44902203 | 14.61503998 | 17.17634807 |
| TMEM126  | 55863  | 1205  | 73.78255859 | 62.31918237 | 84.16322444 | 48.71731972 |
| SLC39A14 | 23516  | 4740  | 18.75695846 | 7.803845077 | 20.2815541  | 3.373814383 |
| AGPAT1   | 10554  | 2259  | 39.35723023 | 29.88858056 | 41.80800723 | 31.81153003 |
| SF3B14   | 51639  | 783   | 113.5478711 | 112.1278133 | 120.3486636 | 78.59307067 |
| TDP1     | 55775  | 3763  | 23.57257426 | 18.8309311  | 21.28007562 | 6.778112339 |
| FBN2     | 2201   | 10724 | 8.271502884 | 2.119445528 | 8.905325637 | 0.566287382 |
| ARMC10   | 83787  | 2629  | 33.74043246 | 27.03827555 | 32.8700903  | 15.4766837  |
| MED25    | 81857  | 2361  | 37.57035025 | 37.09159047 | 28.81562607 | 55.12992752 |
| UTP6     | 55813  | 2065  | 42.95573701 | 28.91968984 | 43.07548888 | 29.31052301 |
| NLRC5    | 84166  | 6822  | 13.00257944 | 13.98012153 | 10.9637651  | 50.17695797 |
| MRPL51   | 51258  | 690   | 128.5559376 | 96.56083005 | 115.1348845 | 51.63402881 |
| XIAP     | 331    | 8460  | 10.46089962 | 15.85641563 | 9.465357513 | 22.75530126 |
| FAM125B  | 89853  | 4818  | 18.36845387 | 9.666258014 | 11.5772472  | 11.34408323 |
| RFC2     | 5982   | 1715  | 51.60303835 | 35.73118852 | 52.60559365 | 21.12814371 |
| FBXO41   | 150726 | 6939  | 12.7538854  | 11.36803147 | 11.90551112 | 8.839306164 |
| KHNYN    | 23351  | 6301  | 14.04526436 | 10.85694877 | 12.50741406 | 15.645589   |
| VPS36    | 51028  | 4427  | 19.99078626 | 18.52325005 | 27.01314094 | 15.68400723 |
| FADS1    | 3992   | 4432  | 19.96823348 | 16.79289637 | 17.0667745  | 4.750135773 |
| DTX3L    | 151636 | 5768  | 15.3431364  | 19.58671483 | 13.0038298  | 108.6546047 |
| IFRD1    | 3475   | 3514  | 25.1265864  | 14.1410611  | 23.44936168 | 29.6672921  |
| BLMH     | 642    | 2543  | 34.72073323 | 19.36532573 | 41.04391353 | 9.472683717 |

|         |        |       |             |             |             |             |
|---------|--------|-------|-------------|-------------|-------------|-------------|
| RALA    | 5898   | 2828  | 31.22164943 | 18.35926999 | 33.76970019 | 12.31179789 |
| FCHSD2  | 9873   | 4507  | 19.59059787 | 8.207283263 | 20.57998896 | 6.15326253  |
| NNT     | 23530  | 4689  | 18.83020358 | 26.70760692 | 19.06023759 | 12.77861877 |
| ATP6VOB | 533    | 1028  | 85.88990719 | 106.2140229 | 95.16035458 | 145.5203597 |
| SNRPB2  | 6629   | 1692  | 52.18370248 | 62.95155042 | 56.31762847 | 58.14446064 |
| THAP4   | 51078  | 2245  | 39.32954325 | 19.95072144 | 35.38666827 | 8.385694546 |
| PEAK1   | 79834  | 11576 | 7.609747618 | 5.447620057 | 6.880991278 | 4.249327375 |
| ITGB2   | 3689   | 2977  | 29.59033874 | 175.5265857 | 53.93900525 | 398.5339489 |
| PPP1R8  | 5511   | 2659  | 33.12916075 | 26.56561153 | 28.92352506 | 17.73821928 |
| EXOSC8  | 11340  | 1427  | 61.73121123 | 47.15870413 | 59.52100495 | 19.29244945 |
| RASSF5  | 83593  | 3637  | 24.22063196 | 34.12642436 | 30.32462068 | 49.70277004 |
| TMEM43  | 79188  | 3343  | 26.35071446 | 19.39704196 | 23.38479261 | 12.47392934 |
| SLC17A9 | 63910  | 2612  | 33.72528271 | 22.86338419 | 27.34083053 | 4.572474316 |
| CHPT1   | 56994  | 1567  | 56.08554707 | 40.67016454 | 63.50677894 | 21.70264772 |
| FAM43A  | 131583 | 3182  | 27.61975244 | 5.742388482 | 21.57999605 | 5.534667215 |
| ZNF192  | 7745   | 5362  | 16.39053567 | 12.79978868 | 13.08215979 | 10.87271774 |
| NUP54   | 53371  | 2358  | 37.27143862 | 22.49117005 | 36.64778091 | 19.57327428 |
| SLC35B4 | 84912  | 6816  | 12.89408044 | 12.68472442 | 12.3063454  | 4.217267978 |
| SENP5   | 205564 | 6324  | 13.89722521 | 9.40802132  | 11.2925758  | 8.866665882 |
| CD99L2  | 83692  | 3736  | 23.52410392 | 14.851536   | 22.90426348 | 9.915546553 |
| ARHGEF1 | 9138   | 3261  | 26.88796875 | 54.46110081 | 25.33343811 | 55.30945014 |
| HAT1    | 8520   | 1682  | 52.12940909 | 40.40664022 | 56.14999306 | 22.02406773 |
| SCYL1   | 57410  | 2667  | 32.87651522 | 26.48592466 | 32.48097194 | 25.19924353 |
| PSAT1   | 29968  | 2221  | 39.4784629  | 17.3570709  | 37.29114203 | 5.195157672 |
| SNRNP40 | 9410   | 1638  | 53.52971068 | 46.11738714 | 59.46414834 | 29.04199194 |
| GLRX5   | 51218  | 1182  | 74.18076657 | 49.76973669 | 77.57833031 | 21.40745167 |
| EMILIN2 | 84034  | 4009  | 21.87120631 | 0.555831092 | 15.0202437  | 0.807897682 |
| NDUFB8  | 4714   | 686   | 127.8158398 | 129.2819366 | 121.0421446 | 86.16505537 |
| ZNF384  | 171017 | 3251  | 26.97067551 | 28.10255329 | 25.34637248 | 24.40852485 |
| GRK6    | 2870   | 2952  | 29.70246141 | 52.76424344 | 29.05881203 | 41.48694515 |
| WDR45L  | 56270  | 2596  | 33.77568031 | 23.43348341 | 28.40461545 | 25.65450536 |
| NUP88   | 4927   | 2518  | 34.82194841 | 23.00893488 | 34.90645779 | 13.18440569 |
| DHX29   | 54505  | 4491  | 19.47835224 | 17.26692814 | 18.72441216 | 10.86291605 |
| SKA2    | 348235 | 2990  | 29.25661536 | 29.88491859 | 25.43896792 | 18.48263531 |
| USP33   | 23032  | 4524  | 19.33626877 | 23.05165704 | 20.7828733  | 38.6601542  |
| INTS8   | 55656  | 3393  | 25.7816917  | 16.48423338 | 23.97425085 | 14.19925417 |
| C5orf15 | 56951  | 2298  | 38.06670145 | 43.63564323 | 41.92595787 | 51.44406265 |
| TIMM44  | 10469  | 2017  | 43.369995   | 30.82316264 | 41.0627796  | 11.84264047 |
| RBM22   | 55696  | 2352  | 37.19272106 | 36.38084649 | 38.71757319 | 37.09474487 |
| MPP1    | 4354   | 2216  | 39.47530682 | 42.43474412 | 45.57496206 | 82.30523715 |
| ESF1    | 51575  | 3216  | 27.20064674 | 17.53005884 | 30.94375703 | 9.00103464  |
| AAMP    | 14     | 1859  | 46.94615049 | 33.80248365 | 44.78009466 | 24.28275225 |
| CHTF8   | 54921  | 2934  | 29.74536256 | 33.26541101 | 33.05375101 | 32.56524312 |
| DSTN    | 11034  | 1746  | 49.98447523 | 31.90616906 | 47.19419068 | 11.47792522 |
| ATAD5   | 79915  | 6245  | 13.97484288 | 12.16748527 | 12.85639861 | 7.973979229 |
| CAPZA2  | 830    | 2373  | 36.6913222  | 47.89071606 | 41.13508628 | 76.85984219 |
| TAF5    | 6877   | 3283  | 26.52101967 | 15.40755999 | 24.97060232 | 6.47427067  |
| HSPA4L  | 22824  | 3284  | 26.51294384 | 12.2815822  | 20.26635196 | 2.40399685  |
| GPT2    | 84706  | 3963  | 21.97035266 | 3.092555554 | 15.67441833 | 1.430231684 |
| ARAF    | 369    | 2503  | 34.78566024 | 46.20461981 | 34.1026942  | 43.75310222 |
| TWF2    | 11344  | 1659  | 52.48252416 | 85.8288641  | 56.80108714 | 115.063543  |
| CENPB   | 1059   | 2856  | 30.48617212 | 32.22335392 | 30.10955808 | 20.20035922 |
| ACP1    | 52     | 1597  | 54.52004232 | 47.85949334 | 55.16953381 | 31.30865946 |
| GALNT7  | 51809  | 4339  | 20.06649172 | 19.1557021  | 26.10016872 | 14.6958036  |
| ARSB    | 411    | 6076  | 14.29626751 | 10.45215852 | 20.44691239 | 12.39360385 |
| TWF1    | 5756   | 3083  | 28.17519345 | 26.38142392 | 19.32607937 | 29.02158853 |
| CDYL    | 9425   | 3477  | 24.98249106 | 21.34118033 | 26.25108338 | 15.19526409 |
| IRF2BP1 | 26145  | 2630  | 32.95046968 | 22.79163201 | 29.88514495 | 12.69990965 |
| DPY19L1 | 23333  | 4879  | 17.76178218 | 16.76154853 | 17.36527758 | 7.717107708 |
| DOCK10  | 55619  | 7431  | 11.66192104 | 3.598428498 | 8.188670606 | 31.13661558 |
| DHX36   | 170506 | 3625  | 23.90613386 | 23.54342573 | 22.96446786 | 20.77338952 |
| MAML1   | 9794   | 5725  | 15.13707166 | 15.14094574 | 14.13485827 | 20.57879445 |

|           |        |       |             |             |             |             |
|-----------|--------|-------|-------------|-------------|-------------|-------------|
| SMARCA1   | 56916  | 5114  | 16.94558765 | 17.51637451 | 17.39360276 | 12.34998147 |
| WDHD1     | 11169  | 6054  | 14.31445908 | 10.74779385 | 12.38950946 | 5.182767387 |
| PTPRE     | 5791   | 5392  | 16.07190936 | 5.083163988 | 14.81187682 | 23.12614606 |
| DBNL      | 28988  | 2237  | 38.73926475 | 72.31851995 | 39.00787056 | 78.54638044 |
| SETD1B    | 23067  | 8195  | 10.54976804 | 15.11836153 | 10.02925835 | 19.66240084 |
| HSD17B11  | 51170  | 1892  | 45.69521622 | 56.88593379 | 51.14609974 | 71.68463963 |
| SDHD      | 6392   | 1382  | 62.55813971 | 61.5934049  | 64.21099839 | 57.27184183 |
| CCNL2     | 81669  | 3136  | 27.56866999 | 29.34626875 | 28.56656212 | 23.17345721 |
| PIBF1     | 10464  | 3114  | 27.76343901 | 17.17400268 | 18.86228762 | 9.295866218 |
| PPIL1     | 51645  | 1750  | 49.40305662 | 33.48856919 | 40.68740833 | 20.01153902 |
| UBE2O     | 63893  | 5395  | 16.02508787 | 20.07352823 | 13.62874828 | 34.33223533 |
| EXOC6     | 54536  | 3637  | 23.77106106 | 17.40018765 | 20.97162465 | 21.42840589 |
| STIM1     | 6786   | 4062  | 21.28393626 | 24.57632761 | 25.33128478 | 25.16656223 |
| RGS19     | 10287  | 1593  | 54.27203332 | 75.39662089 | 50.4006336  | 98.35526675 |
| LDB1      | 8861   | 2305  | 37.41907285 | 35.47921705 | 40.6070062  | 31.8792526  |
| MTF2      | 22823  | 4144  | 20.76413532 | 22.96080029 | 27.12439504 | 30.72580956 |
| SNX27     | 81609  | 7085  | 12.14489439 | 10.37893944 | 9.006068868 | 14.42859221 |
| DENND3    | 22898  | 5458  | 15.7652211  | 22.29143383 | 12.89077053 | 19.54562308 |
| GSTK1     | 373156 | 1226  | 70.18480974 | 115.9602389 | 75.31112619 | 105.0120366 |
| GATA2     | 2624   | 3484  | 24.69763971 | 6.395886474 | 71.68156944 | 8.889671651 |
| PSMB5     | 5693   | 1379  | 62.39780765 | 45.89157539 | 64.35068874 | 28.18443922 |
| ELK1      | 2002   | 2939  | 29.27750144 | 26.00599213 | 28.68411697 | 29.41038601 |
| STAG1     | 10274  | 5166  | 16.65632535 | 13.19914857 | 14.76457585 | 7.484303683 |
| REXO4     | 57109  | 2397  | 35.81234484 | 22.96189951 | 36.49223663 | 13.17434402 |
| SEPN1     | 57190  | 4357  | 19.70213233 | 20.86659063 | 21.96740806 | 10.31425467 |
| DIP2A     | 23181  | 7290  | 11.77533478 | 11.49315356 | 11.76702512 | 11.96801645 |
| UBE2Q1    | 55585  | 3223  | 26.63425088 | 34.43086472 | 30.1554422  | 49.80641896 |
| HS2ST1    | 9653   | 6770  | 12.67979181 | 8.22868112  | 13.85678494 | 6.847298319 |
| CDCA2     | 157313 | 3735  | 22.98318356 | 17.48058277 | 15.49987272 | 8.129673211 |
| USP36     | 57602  | 5234  | 16.40087707 | 12.34648043 | 15.05716775 | 8.54734022  |
| ELK4      | 2005   | 11170 | 7.685066301 | 6.443595091 | 6.696043467 | 9.06127408  |
| RBM19     | 9904   | 4496  | 19.09301392 | 14.52179195 | 22.41611014 | 9.635181644 |
| MED24     | 9862   | 3735  | 22.98318356 | 19.80734975 | 23.70236011 | 14.63341178 |
| MFAP1     | 4236   | 2063  | 41.51129637 | 30.24389323 | 44.85832549 | 30.41829739 |
| PDDC1     | 347862 | 4378  | 19.56094208 | 21.02099105 | 17.61510687 | 6.79694903  |
| NFATC2IP  | 84901  | 3877  | 22.08867795 | 23.50749756 | 23.10671623 | 22.34706044 |
| ECD       | 11319  | 2379  | 35.99739572 | 33.34528616 | 37.21240648 | 27.48403646 |
| HMG3      | 9324   | 1484  | 57.70741537 | 51.05331052 | 56.52294492 | 29.46403935 |
| DMXL1     | 1657   | 11173 | 7.664709962 | 5.90338089  | 6.921169127 | 10.38143189 |
| KIAA1432  | 57589  | 6787  | 12.61791726 | 10.2108391  | 14.47582349 | 24.06955833 |
| CNIH      | 10175  | 1423  | 60.18116965 | 61.54128257 | 64.43962504 | 107.5447789 |
| S100A10   | 6281   | 1069  | 80.11020057 | 24.38861002 | 115.2282656 | 19.88309692 |
| PTPRN2    | 5799   | 4842  | 17.68645279 | 9.802429131 | 13.09075349 | 9.155704458 |
| KLHL9     | 55958  | 4412  | 19.41020046 | 19.69735881 | 18.91602011 | 18.81138572 |
| FAM48A    | 55578  | 3003  | 28.51741739 | 25.08073508 | 27.3692215  | 32.01921742 |
| TM9SF4    | 9777   | 3996  | 21.43088198 | 24.64765932 | 19.77490009 | 22.44143801 |
| ZNFX1-AS1 | 441951 | 1020  | 83.75825318 | 98.74546422 | 76.8496534  | 103.5959475 |
| DCTN5     | 84516  | 7430  | 11.49844122 | 11.15662971 | 12.19934894 | 7.546809561 |
| RAD1      | 5810   | 4683  | 18.24330947 | 12.56199632 | 16.6483188  | 6.267816598 |
| SMCR8     | 140775 | 8327  | 10.25980764 | 12.71112348 | 13.04195597 | 30.60621334 |
| FKBP3     | 2287   | 1353  | 63.14369419 | 47.92632022 | 69.17897212 | 36.95486264 |
| WIPI2     | 26100  | 4489  | 19.03172605 | 14.54443676 | 19.9565023  | 13.61851562 |
| COG5      | 10466  | 5666  | 15.07825949 | 19.89998914 | 14.09559474 | 23.04387868 |
| PSMD6     | 9861   | 1308  | 65.31606899 | 46.16793392 | 78.3433557  | 42.5595851  |
| TCTN3     | 26123  | 2741  | 31.09413793 | 23.81976528 | 32.83739815 | 10.04389834 |
| C11orf82  | 220042 | 3577  | 23.82695892 | 16.50843205 | 26.63948207 | 9.33764674  |
| LOC100288 | 1E+08  | 5762  | 14.791571   | 15.08239275 | 11.5139561  | 9.766612965 |
| MLF1IP    | 79682  | 2554  | 33.37080347 | 22.51011459 | 38.71623662 | 11.49263317 |
| APRT      | 353    | 807   | 105.6121835 | 95.26304366 | 103.9405827 | 45.40226046 |
| MED15     | 51586  | 3384  | 25.18588418 | 27.32729438 | 19.72990088 | 34.51579608 |
| LIG3      | 3980   | 3722  | 22.89871899 | 19.03836479 | 20.83329055 | 12.6721991  |
| COX8A     | 1351   | 521   | 163.1950977 | 227.1097036 | 165.8646207 | 177.1738225 |

|           |        |       |             |             |             |             |
|-----------|--------|-------|-------------|-------------|-------------|-------------|
| FXYD5     | 53827  | 1608  | 52.87602357 | 72.33747602 | 43.22928264 | 52.74732188 |
| UGGT2     | 55757  | 4947  | 17.18711257 | 12.88258497 | 15.29006359 | 7.815628224 |
| DYNLRB1   | 83658  | 702   | 121.1177292 | 126.6527653 | 118.2833493 | 117.0742427 |
| KRIT1     | 889    | 4997  | 17.01513826 | 18.46162327 | 17.50488117 | 11.34282202 |
| ZRANB1    | 54764  | 4942  | 17.2045014  | 15.01482882 | 15.22002733 | 13.80382979 |
| SUCLA2    | 8803   | 2182  | 38.96638218 | 29.92207912 | 35.24640382 | 20.96650918 |
| FBXW5     | 54461  | 2387  | 35.53425209 | 34.82052426 | 32.39640664 | 32.39540245 |
| GSK3B     | 2932   | 7134  | 11.88957944 | 13.36871167 | 11.99471942 | 17.05351088 |
| CD55      | 1604   | 2930  | 28.94889411 | 73.92265173 | 37.64185851 | 194.5527912 |
| SEC24D    | 9871   | 4077  | 20.80457683 | 34.48796274 | 22.49143646 | 49.30386581 |
| MRPS34    | 65993  | 1020  | 83.15711739 | 48.71734186 | 69.80682802 | 18.45674927 |
| PSPC1     | 55269  | 2077  | 40.8378718  | 38.08647236 | 42.72489156 | 41.51887127 |
| BRD9      | 65980  | 2878  | 29.40092897 | 35.84834365 | 33.03618576 | 22.4373896  |
| NUB1      | 51667  | 3112  | 27.19019074 | 38.8811529  | 24.91693683 | 110.7764632 |
| SEC23A    | 10484  | 3890  | 21.75215259 | 21.13759914 | 19.28177128 | 16.44409272 |
| SCFD1     | 23256  | 2172  | 38.95758452 | 30.47021518 | 36.28416942 | 25.62980539 |
| PSMB7     | 5695   | 1012  | 83.61252329 | 60.99274078 | 81.00641048 | 45.00641716 |
| IGFBP4    | 3487   | 2246  | 37.67403098 | 5.258295766 | 38.94563277 | 9.10298983  |
| TUBG1     | 7283   | 1968  | 42.89201596 | 22.53237005 | 42.94405719 | 10.08029907 |
| PACSIN2   | 11252  | 3305  | 25.54054082 | 15.64211282 | 23.39794937 | 13.35234255 |
| KIAA0319L | 79932  | 4822  | 17.50549303 | 18.85436238 | 14.41573755 | 25.02024105 |
| PHF12     | 57649  | 4475  | 18.86290221 | 19.71882529 | 17.56378351 | 21.98445305 |
| SYNPO2    | 171024 | 9950  | 8.483566573 | 21.23069197 | 8.239043961 | 7.568194675 |
| SLC39A1   | 27173  | 2445  | 34.52412573 | 49.48799502 | 36.72639001 | 52.49075628 |
| TIMP1     | 7076   | 931   | 90.44801421 | 270.4628719 | 99.17447982 | 1081.722442 |
| NDUFA5    | 4698   | 1550  | 54.32716209 | 39.39106814 | 52.48040847 | 25.07505915 |
| CCDC59    | 29080  | 1617  | 52.0761294  | 31.83324068 | 50.1752309  | 19.15375141 |
| ECH1      | 1891   | 1276  | 65.99302605 | 62.51888804 | 56.62961472 | 36.48796119 |
| SH3BP2    | 6452   | 9211  | 9.142015116 | 36.52994832 | 11.12507972 | 57.86507395 |
| COPZ1     | 22818  | 1900  | 44.31952697 | 46.7948638  | 50.2635327  | 28.1269578  |
| DAXX      | 1616   | 2632  | 31.91592518 | 32.00256643 | 32.67207366 | 30.07206893 |
| LTBR      | 4055   | 2136  | 39.32711379 | 28.06273043 | 32.24664429 | 22.55527593 |
| ALG8      | 79053  | 1743  | 48.19432878 | 49.60360395 | 56.73050391 | 34.84145662 |
| XRN1      | 54464  | 10092 | 8.323693526 | 10.20102065 | 8.144051939 | 43.22574313 |
| DCP1A     | 55802  | 6025  | 13.94235935 | 11.76112759 | 12.83489173 | 35.04287204 |
| HM13      | 81502  | 2011  | 41.77161366 | 62.60590098 | 46.96384303 | 83.44780079 |
| NDUFA13   | 51079  | 557   | 150.4458329 | 180.8265233 | 152.8685078 | 141.0096927 |
| PHGDH     | 26227  | 2021  | 41.46379461 | 10.80534543 | 31.25885386 | 2.804556241 |
| TEX2      | 55852  | 5105  | 16.41495179 | 14.36081357 | 14.52712071 | 6.978938272 |
| PRRC1     | 133619 | 4700  | 17.82943168 | 15.31382067 | 19.06058273 | 7.14961516  |
| GMIP      | 51291  | 3532  | 23.72546118 | 50.21937063 | 25.36374259 | 97.03059597 |
| SF3B4     | 10262  | 2001  | 41.87822534 | 50.89182255 | 46.98736572 | 56.5505919  |
| STK40     | 83931  | 3863  | 21.69255214 | 15.92074061 | 29.15215579 | 45.06570596 |
| GNL1      | 2794   | 7925  | 10.57392163 | 8.294718233 | 9.251206586 | 8.454757557 |
| EHMT1     | 79813  | 5123  | 16.35727677 | 14.22336286 | 13.69247331 | 9.601837536 |
| PARP9     | 83666  | 6801  | 12.32147168 | 12.22123091 | 9.879216896 | 117.4807708 |
| NHP2L1    | 4809   | 1601  | 52.21358072 | 40.08483023 | 50.41272882 | 19.59804732 |
| GRIPAP1   | 56850  | 3260  | 25.64231372 | 38.00459286 | 26.11894443 | 67.4969859  |
| GNPAT     | 8443   | 2687  | 31.11051088 | 23.96674577 | 30.35203494 | 12.05382139 |
| C6orf48   | 50854  | 842   | 99.28021702 | 91.30317843 | 79.0435865  | 61.78648192 |
| SUN2      | 25777  | 4070  | 20.53905227 | 29.83877474 | 16.87163328 | 31.03577653 |
| GTF3C5    | 9328   | 2457  | 34.02276871 | 33.37502156 | 36.37503218 | 23.06881629 |
| PPP4C     | 5531   | 1429  | 58.35518304 | 68.76781943 | 68.16114415 | 72.52874586 |
| NGLY1     | 55768  | 2599  | 32.08524685 | 19.63396876 | 29.99772102 | 19.16025405 |
| RUNX3     | 864    | 4340  | 19.21418354 | 25.87734403 | 15.04308554 | 30.36432944 |
| SLC22A15  | 55356  | 4729  | 17.63365544 | 13.28797147 | 13.67162973 | 7.448217838 |
| PSMC6     | 5706   | 1599  | 52.15106727 | 37.62653213 | 59.06459558 | 36.33338566 |
| SFMBT2    | 57713  | 8024  | 10.39251702 | 5.581925428 | 11.74389376 | 12.26077111 |
| TOMM34    | 10953  | 2066  | 40.36280569 | 27.61140721 | 33.23695423 | 18.02851442 |
| COX7A2    | 1347   | 761   | 109.578918  | 129.1316872 | 106.0588421 | 99.48540702 |
| KCNH2     | 3757   | 4307  | 19.31394715 | 5.794581075 | 67.79557469 | 9.963993254 |
| P2RY2     | 5029   | 2681  | 31.0276652  | 26.59696349 | 34.51798787 | 10.79721276 |

|           |        |       |             |             |             |             |
|-----------|--------|-------|-------------|-------------|-------------|-------------|
| ARHGAP15  | 55843  | 1774  | 46.89130236 | 61.04660924 | 41.20886552 | 73.6001221  |
| G6PC3     | 92579  | 1848  | 45.01362034 | 54.2612057  | 38.64407432 | 27.05623872 |
| ARNT      | 405    | 4903  | 16.92449199 | 15.95232966 | 14.47923309 | 15.60638593 |
| SEC24A    | 10802  | 6387  | 12.99213782 | 16.32780593 | 14.48923211 | 25.54527377 |
| PAXIP1    | 22976  | 3723  | 22.28868768 | 22.44487155 | 25.25428923 | 10.11328727 |
| TRIM56    | 81844  | 3547  | 23.39463891 | 23.24445823 | 17.21491289 | 49.42300404 |
| CKAP2L    | 150468 | 3273  | 25.35312686 | 16.88435864 | 21.4964331  | 9.772001328 |
| EPDR1     | 54749  | 2613  | 31.67868276 | 9.977582899 | 21.42765471 | 4.2608448   |
| STX17     | 55014  | 6910  | 11.97921824 | 13.15712524 | 10.79356306 | 19.9499357  |
| CWC22     | 57703  | 3279  | 25.24440319 | 22.83372433 | 23.97009187 | 16.42149361 |
| THYN1     | 29087  | 1323  | 62.5671943  | 61.47689337 | 65.3178136  | 33.6616401  |
| SPRED2    | 200734 | 4457  | 18.57222303 | 18.34857422 | 17.39769069 | 22.16407564 |
| TARP      | 445347 | 1027  | 80.60019285 | 167.2872443 | 41.9689302  | 43.36353442 |
| ORC1      | 4998   | 3192  | 25.93245553 | 31.13514329 | 31.57356866 | 17.88375293 |
| SMAD2     | 4087   | 10531 | 7.86026     | 5.988191984 | 7.764429081 | 4.344214512 |
| SAP130    | 79595  | 4173  | 19.83618453 | 14.41764315 | 17.77161544 | 16.10505212 |
| RFC3      | 5983   | 2396  | 34.46244236 | 26.31955333 | 35.27291509 | 10.89871591 |
| EXOC3     | 11336  | 2774  | 29.76640659 | 44.18095768 | 33.13225349 | 47.65178353 |
| SPG21     | 51324  | 1815  | 45.49422143 | 47.39031202 | 31.43079095 | 81.64073151 |
| DCAF6     | 55827  | 3633  | 22.72832697 | 23.67558941 | 25.18202633 | 25.79811824 |
| LPXN      | 9404   | 1926  | 42.87228032 | 57.73287107 | 46.51336387 | 119.5023973 |
| SLC12A6   | 9990   | 7754  | 10.64895691 | 31.78397593 | 13.07927334 | 51.76894961 |
| KLC1      | 3831   | 2624  | 31.46799234 | 23.09851    | 33.65740482 | 24.53215641 |
| C10orf137 | 26098  | 4698  | 17.57599231 | 14.4191435  | 14.43644283 | 11.33222455 |
| SERINC1   | 57515  | 3144  | 26.19835424 | 32.88624864 | 27.82184835 | 49.44827187 |
| ZNF107    | 51427  | 5508  | 14.95418041 | 12.17731266 | 14.07797883 | 23.63140139 |
| ABCA1     | 19     | 10515 | 7.83334529  | 25.04880964 | 8.981862894 | 45.2408776  |
| UBR2      | 23304  | 7898  | 10.42892197 | 13.71191248 | 11.87774551 | 17.04421295 |
| JTB       | 10899  | 1574  | 52.3301307  | 60.1676563  | 58.66038165 | 52.47203055 |
| GNA15     | 2769   | 2132  | 38.63397079 | 14.73705842 | 43.50563332 | 15.00176376 |
| CCNL1     | 57018  | 2625  | 31.30028173 | 53.14028977 | 35.97877651 | 81.665587   |
| PRPF4     | 9128   | 2756  | 29.81249621 | 21.83048798 | 28.51884297 | 16.08560268 |
| NDUFB4    | 4710   | 1560  | 52.53772653 | 58.85068341 | 59.99945467 | 50.08816737 |
| FOPNL     | 123811 | 2250  | 36.42615706 | 28.81969389 | 42.25695227 | 16.55418257 |
| ERLIN2    | 11160  | 4836  | 16.94765372 | 14.053757   | 13.06330514 | 8.664759022 |
| RRAGA     | 10670  | 1657  | 49.46219275 | 50.160888   | 52.78931274 | 107.7503061 |
| ZNF24     | 7572   | 6311  | 12.98666667 | 12.07554717 | 13.72631154 | 14.0811711  |
| NOL7      | 51406  | 896   | 91.47193458 | 82.31877081 | 100.2187763 | 56.93311771 |
| SLC7A2    | 6542   | 7584  | 10.80681084 | 2.468083534 | 12.0630672  | 0.640597668 |
| RHOBTB3   | 22836  | 5566  | 14.6881903  | 27.94416348 | 12.94432332 | 31.02260512 |
| LOC100129 | 1E+08  | 5714  | 14.30774715 | 19.53783253 | 12.5720719  | 13.28505838 |
| FUBP3     | 8939   | 3175  | 25.74943849 | 17.2651466  | 23.75705821 | 13.58026703 |
| ANKH      | 56172  | 8224  | 9.940961481 | 6.015181908 | 8.22119694  | 4.356749604 |
| LCP2      | 3937   | 2472  | 33.07219548 | 98.5259403  | 42.56464853 | 130.1211421 |
| DIAPH2    | 1730   | 4983  | 16.40667614 | 13.54972978 | 14.58598393 | 15.27458408 |
| TOX4      | 9878   | 4538  | 17.97048943 | 19.83790318 | 18.71671972 | 27.07675624 |
| C15orf44  | 81556  | 2708  | 30.11450556 | 29.3763916  | 29.72654877 | 17.19299796 |
| VEZF1     | 7716   | 4652  | 17.53011201 | 20.93247705 | 16.16882525 | 26.80485374 |
| PPP2R5E   | 5529   | 3366  | 24.22759389 | 22.90555821 | 24.66871991 | 18.28234532 |
| AASDHPPT  | 60496  | 2880  | 28.31600036 | 20.65844681 | 27.51103664 | 10.05115535 |
| ATPIF1    | 93974  | 1944  | 41.94963017 | 37.02415492 | 45.86531342 | 24.7829575  |
| TIMP2     | 7077   | 3670  | 22.22073053 | 27.38352611 | 25.50385539 | 63.81749167 |
| SLC38A1   | 81539  | 8487  | 9.608823029 | 3.308226497 | 22.72923143 | 2.337460654 |
| ORC2      | 4999   | 3657  | 22.29972137 | 17.85342538 | 19.58587205 | 14.8348196  |
| MEN1      | 4221   | 3179  | 25.58845388 | 18.01446995 | 28.24662585 | 11.65287258 |
| EXOSC2    | 23404  | 2194  | 37.0764334  | 24.27393421 | 37.46115413 | 8.211562809 |
| DYNC1LI2  | 1783   | 4352  | 18.69156592 | 15.41191133 | 18.93406639 | 10.74473055 |
| ZNF721    | 170960 | 5170  | 15.69464385 | 11.12008369 | 15.65223667 | 9.201311953 |
| SPECC1L   | 23384  | 6795  | 11.94132579 | 10.69072189 | 11.06951803 | 8.460602955 |
| HHEX      | 3087   | 1772  | 45.79080627 | 20.37183687 | 46.74019552 | 20.3342763  |
| PGRMC1    | 10857  | 1928  | 42.08574103 | 44.0348822  | 42.41037482 | 21.73380427 |
| ATP6V1G1  | 9550   | 1611  | 50.36704451 | 55.74275106 | 65.70680661 | 100.2720252 |

|           |        |       |             |             |             |             |
|-----------|--------|-------|-------------|-------------|-------------|-------------|
| PELP1     | 27043  | 3688  | 22.00143946 | 15.22609451 | 22.17115039 | 9.166382894 |
| LPGAT1    | 9926   | 7802  | 10.37386857 | 12.48114371 | 11.88849144 | 15.69718817 |
| DLG1      | 1739   | 5034  | 16.07805374 | 18.14886785 | 14.8579272  | 17.33151369 |
| C11orf57  | 55216  | 3757  | 21.54296581 | 18.56444778 | 23.61980297 | 9.860122949 |
| RANBP9    | 10048  | 3132  | 25.84192929 | 32.15848452 | 27.86098545 | 42.52815831 |
| SRF       | 6722   | 4343  | 18.63617834 | 17.23964588 | 16.97867412 | 17.19922874 |
| LOC100129 | 1E+08  | 4139  | 19.50532408 | 13.99770428 | 13.83381743 | 5.233121125 |
| CCDC93    | 54520  | 6946  | 11.62288171 | 12.1906738  | 11.16347645 | 11.86129387 |
| INO80     | 54617  | 6249  | 12.9192729  | 14.62016335 | 12.98341308 | 13.89694066 |
| EBPL      | 84650  | 988   | 81.7130935  | 51.19738809 | 69.50156624 | 14.95678846 |
| MRPL11    | 65003  | 1704  | 47.25830411 | 41.19266179 | 51.95323651 | 18.05703472 |
| ZC3H7B    | 23264  | 5868  | 13.72327032 | 15.15171118 | 15.01461239 | 9.107229008 |
| SIPA1     | 6494   | 3642  | 22.11096931 | 83.39400036 | 24.77171694 | 79.64869869 |
| TOMM22    | 56993  | 1396  | 57.68492135 | 43.41725663 | 62.35624762 | 21.31593328 |
| TRAPPC10  | 7109   | 6970  | 11.55353662 | 15.53754445 | 11.24629074 | 18.09371329 |
| MLX       | 6945   | 2568  | 31.35831394 | 40.17583062 | 32.91039897 | 55.41568951 |
| PEA15     | 8682   | 2474  | 32.54977777 | 16.21256397 | 23.99798623 | 12.10972988 |
| UBXN2B    | 137886 | 5088  | 15.82707355 | 15.72266781 | 18.56216359 | 21.08633989 |
| NXF1      | 10482  | 4147  | 19.36912564 | 38.4194284  | 25.78010351 | 58.47836456 |
| TTC1      | 7265   | 1407  | 57.0886738  | 44.34481288 | 62.01891005 | 36.97527916 |
| SLC9A3R1  | 9368   | 2013  | 39.80098255 | 95.19925925 | 49.12134541 | 90.50470773 |
| LSM3      | 27258  | 695   | 115.2796804 | 103.2404669 | 123.4267815 | 55.63152924 |
| DNA2      | 1763   | 4287  | 18.68891483 | 15.64558855 | 19.81256685 | 9.113312468 |
| ADCY7     | 113    | 6138  | 13.05301041 | 12.30698601 | 18.82905905 | 42.04900623 |
| MYO9A     | 4649   | 8704  | 9.204891759 | 4.326599692 | 8.180487658 | 2.279185268 |
| AGPAT6    | 137964 | 6328  | 12.66109006 | 11.90225149 | 13.38893636 | 21.62482796 |
| EIF3K     | 27335  | 910   | 88.04327239 | 107.9881472 | 91.24715518 | 47.82659949 |
| WDR76     | 79968  | 4037  | 19.8462665  | 20.03672642 | 21.40586262 | 6.769357567 |
| PPP1R18   | 170954 | 4615  | 17.36064526 | 51.76091832 | 20.7393276  | 73.16388806 |
| IFI16     | 3428   | 2750  | 29.13431923 | 21.79708807 | 19.05404393 | 192.2706146 |
| RBBP8     | 5932   | 3279  | 24.37175715 | 18.21261345 | 25.7098566  | 9.075035942 |
| SDCBP     | 6386   | 2173  | 36.77634225 | 68.70588991 | 42.00414952 | 205.9688063 |
| RNF26     | 79102  | 2803  | 28.51052148 | 19.39749378 | 19.52292301 | 8.594018798 |
| MLL4      | 9757   | 8469  | 9.412044579 | 9.577411412 | 9.380454631 | 8.867765752 |
| SBDS      | 51119  | 1605  | 49.66392868 | 34.4314678  | 54.89454548 | 21.56718727 |
| PMPCA     | 23203  | 2097  | 38.01173368 | 25.82181325 | 38.08566514 | 14.86602046 |
| CDC42SE1  | 56882  | 3193  | 24.96417336 | 38.52290698 | 43.60684552 | 64.22187227 |
| RBM17     | 84991  | 3760  | 21.19962913 | 18.49037171 | 23.60095739 | 11.62889213 |
| USP19     | 10869  | 4883  | 16.32410517 | 18.29938697 | 17.69720815 | 16.1677773  |
| C11orf2   | 738    | 2546  | 31.22789449 | 40.96060348 | 34.52256902 | 22.42142158 |
| ITCH      | 83737  | 6379  | 12.46374343 | 11.56256759 | 14.07681824 | 17.42176607 |
| KIAA1147  | 57189  | 7296  | 10.89723401 | 2.473882602 | 9.846055217 | 1.609220676 |
| SECISBP2L | 9728   | 7190  | 11.05788865 | 10.75423388 | 11.34296494 | 21.56613477 |
| UTRN      | 7402   | 12436 | 6.393230892 | 5.823465949 | 5.011981715 | 12.27334856 |
| FAM76B    | 143684 | 3958  | 20.08747331 | 18.97286881 | 21.03238908 | 22.0431632  |
| CLIC4     | 25932  | 4452  | 17.85853984 | 11.11160288 | 13.33580816 | 18.64237058 |
| EIF6      | 3692   | 1259  | 63.15029338 | 59.46924708 | 55.38043785 | 60.45532365 |
| SPIN1     | 10927  | 4535  | 17.53169115 | 12.97195783 | 15.28145573 | 10.53433554 |
| CR1       | 1378   | 9979  | 7.967353379 | 11.36605236 | 8.89263451  | 12.11043503 |
| TRIP11    | 9321   | 8106  | 9.808317218 | 9.593955955 | 9.644135419 | 11.3625873  |
| PDCD7     | 10081  | 2866  | 27.74117912 | 21.07036203 | 26.17100149 | 11.72477015 |
| MED28     | 80306  | 1363  | 58.33178237 | 57.22042528 | 56.42527743 | 58.21871921 |
| UHRF1BP1  | 54887  | 9658  | 8.210999503 | 8.675200814 | 7.131790454 | 7.377817329 |
| MRPL16    | 54948  | 1196  | 66.3058806  | 66.51443851 | 60.77086782 | 46.88360789 |
| KAT6B     | 23522  | 8550  | 9.275068211 | 10.52917013 | 8.87148881  | 7.481581368 |
| KDM4A     | 9682   | 4526  | 17.52139487 | 16.24719089 | 12.18411903 | 13.19410397 |
| SCRIB     | 23513  | 5276  | 15.03067346 | 9.249499234 | 13.37549475 | 4.182097434 |
| OGFOD1    | 55239  | 3020  | 26.25888517 | 22.50462545 | 25.04633926 | 11.86420819 |
| CXorf38   | 159013 | 4260  | 18.6154538  | 22.85865804 | 16.51592149 | 24.42451539 |
| LYN       | 4067   | 3106  | 25.53182009 | 41.75422489 | 36.18914779 | 183.5285506 |
| ACADM     | 34     | 2627  | 30.18722238 | 29.60358088 | 30.8039831  | 26.04528195 |
| POLA2     | 23649  | 2514  | 31.5440864  | 35.98650358 | 29.75131485 | 22.30421441 |



|          |        |       |             |             |             |             |
|----------|--------|-------|-------------|-------------|-------------|-------------|
| EPN1     | 29924  | 2964  | 26.68604826 | 29.62080897 | 22.66820314 | 23.15228898 |
| HSPE1    | 3336   | 965   | 81.96626636 | 56.57410131 | 102.2486876 | 23.07479267 |
| DIAPH3   | 81624  | 4812  | 16.43754095 | 13.01246559 | 13.56753767 | 6.436329184 |
| BRD8     | 10902  | 4074  | 19.41518091 | 14.16633906 | 18.87767627 | 10.13634954 |
| ABHD2    | 11057  | 9159  | 8.636035269 | 48.75605418 | 9.135141991 | 55.25408422 |
| NSMAF    | 8439   | 3582  | 22.02486345 | 17.97840477 | 24.36086165 | 16.6712771  |
| TLK2     | 11011  | 5455  | 14.46252261 | 14.82827948 | 14.83447545 | 23.45280319 |
| ENTPD1   | 953    | 12740 | 6.192547949 | 7.153733757 | 5.904032578 | 9.962550791 |
| EMD      | 2010   | 1370  | 57.58617581 | 55.95214858 | 49.19696268 | 30.88148347 |
| RIOK1    | 83732  | 2495  | 31.62046528 | 19.29132661 | 30.31661105 | 8.113381281 |
| CD151    | 977    | 1574  | 50.1226562  | 28.88047502 | 59.46578735 | 15.94738183 |
| ZBTB11   | 27107  | 5132  | 15.37277102 | 10.03007603 | 12.35101879 | 6.942221333 |
| SPDYE7P  | 441251 | 6338  | 12.44762715 | 17.19236081 | 13.80118195 | 17.02344335 |
| STARD3NL | 83930  | 1646  | 47.93017063 | 48.33005374 | 48.77776994 | 46.73327334 |
| TMEM50A  | 23585  | 2327  | 33.81550266 | 36.67594253 | 51.93591899 | 90.29701751 |
| HEXA     | 3073   | 2437  | 32.28915663 | 68.2122211  | 37.9740359  | 91.95270878 |
| MRPS25   | 64432  | 4574  | 17.20347064 | 14.46902216 | 15.1511591  | 7.65636058  |
| PPIP5K1  | 9677   | 5721  | 13.7543567  | 15.50208155 | 10.89477445 | 9.659688793 |
| SAMHD1   | 25939  | 3189  | 24.67503126 | 81.89398135 | 16.96108464 | 209.7922208 |
| RER1     | 11079  | 3118  | 25.17135617 | 25.7279559  | 25.61438095 | 27.6570544  |
| ALDH3A2  | 224    | 3823  | 20.52950262 | 17.25306688 | 15.19835453 | 10.80185405 |
| FTO      | 79068  | 4313  | 18.1971455  | 10.22974069 | 13.91256022 | 5.726019309 |
| UBE2G1   | 7326   | 4208  | 18.65120925 | 14.56249722 | 21.13851819 | 15.34572416 |
| SOX12    | 6666   | 4645  | 16.89650991 | 7.291833817 | 15.87478616 | 2.658376887 |
| UBA3     | 9039   | 2136  | 36.74358077 | 43.29380345 | 39.17077036 | 50.32290554 |
| CNOT6L   | 246175 | 8794  | 8.924754211 | 8.640657891 | 10.18702966 | 10.887975   |
| TSR1     | 55720  | 4890  | 16.04995675 | 11.98466178 | 17.80149728 | 4.553614504 |
| UTP11L   | 51118  | 2067  | 37.97014443 | 25.54975631 | 38.84286856 | 14.20037984 |
| FAM204A  | 63877  | 2766  | 28.3746524  | 26.66580573 | 25.28389588 | 13.75872243 |
| SLC26A2  | 1836   | 8082  | 9.685709275 | 7.968157126 | 8.391785251 | 3.406375323 |
| VEGFA    | 7422   | 3677  | 21.28906782 | 31.33111178 | 24.24861825 | 60.22767911 |
| ZNF84    | 7637   | 7025  | 11.1430466  | 8.500947973 | 8.752151681 | 3.976538518 |
| TMF1     | 7110   | 6895  | 11.3531403  | 12.8302503  | 9.652603311 | 17.46848056 |
| LOC10013 | 1E+08  | 21017 | 3.724599246 | 4.272806392 | 3.367768714 | 5.567106761 |
| FAM111A  | 63901  | 3799  | 20.60539678 | 34.84143583 | 20.35541528 | 31.06502424 |
| NFKB1    | 4790   | 4093  | 19.12531208 | 30.05219692 | 21.37109485 | 26.16292903 |
| PSMD4    | 5710   | 1332  | 58.6152524  | 71.60089269 | 72.4903423  | 77.81049387 |
| R3HDM2   | 22864  | 3974  | 19.64658183 | 21.86833091 | 15.47153134 | 26.38604706 |
| CSNK1G2  | 1455   | 2921  | 26.6590654  | 31.27743949 | 29.51187355 | 35.69012818 |
| HSBP1    | 3281   | 1919  | 40.57901512 | 41.45454323 | 36.55369503 | 35.44351118 |
| WT1      | 7490   | 3037  | 25.64080673 | 4.035494785 | 32.6980039  | 3.066094072 |
| NADK     | 65220  | 3662  | 21.26464501 | 36.75339748 | 21.52081267 | 114.1495363 |
| CUTA     | 51596  | 1214  | 64.14425867 | 44.97035236 | 67.87566469 | 38.51817738 |
| PNPLA2   | 57104  | 2443  | 31.87520672 | 25.53956272 | 33.38351121 | 20.63233192 |
| VPS13D   | 55187  | 16341 | 4.765383393 | 4.800018666 | 4.654703757 | 4.955115671 |
| SC5DL    | 6309   | 7019  | 11.09433395 | 9.587615158 | 7.64586542  | 11.01692914 |
| ZDHHC2   | 51201  | 4012  | 19.40955384 | 17.27342098 | 19.48538427 | 11.60484508 |
| SS18     | 6760   | 3440  | 22.57754182 | 22.67193013 | 22.04977597 | 16.53561351 |
| NAA38    | 51691  | 12520 | 6.203414046 | 7.012466277 | 6.969697    | 5.497269441 |
| MAST2    | 23139  | 5756  | 13.49317996 | 9.020155585 | 10.31463133 | 6.470971297 |
| SQSTM1   | 8878   | 2931  | 26.4983773  | 95.64091348 | 37.34067089 | 290.7627134 |
| FAM32A   | 26017  | 1464  | 53.05105455 | 69.10248557 | 60.18152014 | 73.42194415 |
| MRPL30   | 51263  | 4554  | 17.05462096 | 15.7069152  | 17.53747031 | 7.734436134 |
| MAEA     | 10296  | 2207  | 35.19109373 | 36.7517432  | 42.41012654 | 47.05301617 |
| MRPL20   | 55052  | 749   | 103.693917  | 98.77229818 | 95.62821642 | 59.18814551 |
| DPP9     | 91039  | 4286  | 18.12103216 | 17.98882616 | 17.59884736 | 13.64954302 |
| ADSL     | 158    | 1565  | 49.62731237 | 39.58305838 | 59.67275688 | 15.26300692 |
| PTPN23   | 25930  | 5283  | 14.66257007 | 14.84707648 | 12.95783886 | 13.75581333 |
| CAPN2    | 824    | 3492  | 22.18280575 | 3.06299223  | 22.20547177 | 11.4199559  |
| SMC5     | 23137  | 5965  | 12.98614546 | 13.14955658 | 16.96653826 | 10.82561731 |
| TSPAN14  | 81619  | 5579  | 13.88463124 | 77.44624049 | 16.24684758 | 88.64199896 |
| GSTO1    | 9446   | 1070  | 72.2037117  | 135.9904141 | 69.9016874  | 177.6455162 |

|          |        |       |             |             |             |             |
|----------|--------|-------|-------------|-------------|-------------|-------------|
| STIL     | 6491   | 5019  | 15.39310052 | 15.71683013 | 14.14458653 | 10.60744988 |
| CHUK     | 1147   | 3539  | 21.83045253 | 18.82649696 | 21.91057005 | 19.84821007 |
| ACTL6A   | 86     | 1956  | 39.49794045 | 36.56916759 | 47.52826943 | 17.59351058 |
| ATN1     | 1822   | 4367  | 17.69131475 | 17.34900683 | 16.4983063  | 17.47553958 |
| RAP2B    | 5912   | 6237  | 12.38704049 | 5.930772113 | 11.58560019 | 4.965787403 |
| WDTC1    | 23038  | 4802  | 16.08870711 | 16.38066175 | 14.21178216 | 25.75677536 |
| NDUFA10  | 4705   | 4928  | 15.67734812 | 14.78617855 | 17.27836015 | 6.531288395 |
| PDCD6    | 10016  | 1151  | 66.94490474 | 85.95804694 | 79.1170566  | 83.71515097 |
| EPM2AIP1 | 9852   | 7439  | 10.35805691 | 11.74222509 | 11.07689971 | 10.47655763 |
| NUP43    | 348995 | 3862  | 19.95173106 | 12.46293628 | 19.47627526 | 7.023684007 |
| APC      | 324    | 10848 | 7.103022249 | 8.134378978 | 8.0634118   | 13.82741403 |
| TFDP2    | 7029   | 9946  | 7.747193379 | 5.690679864 | 7.28641395  | 5.067845051 |
| YIPF3    | 25844  | 1593  | 48.37011008 | 57.07202472 | 51.8595993  | 69.89069342 |
| CFDP1    | 10428  | 1281  | 60.15112049 | 46.79312427 | 56.24364061 | 33.81715587 |
| AGGF1    | 55109  | 4514  | 17.02463429 | 15.45118084 | 16.56951828 | 16.90644248 |
| GALNT1   | 2589   | 3852  | 19.95046708 | 15.0984763  | 21.22720733 | 10.51032518 |
| KRR1     | 11103  | 3357  | 22.89222496 | 18.32047095 | 20.45503349 | 20.08007488 |
| VEZT     | 55591  | 4653  | 16.51605398 | 15.42061562 | 11.98778788 | 11.5723356  |
| DDHD1    | 80821  | 12969 | 5.925607154 | 3.419207669 | 6.076738067 | 2.622256841 |
| FBXO7    | 25793  | 2153  | 35.69400798 | 40.36449004 | 37.68385897 | 42.87392546 |
| C20orf43 | 51507  | 1654  | 46.46263554 | 52.54216871 | 47.64765175 | 48.71021007 |
| DYRK1A   | 1859   | 6580  | 11.64814787 | 14.62974465 | 12.23396567 | 19.0123157  |
| AKT2     | 208    | 5263  | 14.56295136 | 15.79262615 | 14.41216594 | 10.84646387 |
| CHKA     | 1119   | 2733  | 28.04420527 | 28.45539955 | 31.54196218 | 32.4419473  |
| DYNC1LI1 | 51143  | 2517  | 30.45085936 | 23.46073161 | 27.11361856 | 21.31253424 |
| CCNH     | 902    | 1517  | 50.52393739 | 39.366618   | 41.36557292 | 26.15428948 |
| KIAA0232 | 9778   | 7873  | 9.709186695 | 11.63269826 | 11.02985354 | 11.05606644 |
| UBL4A    | 8266   | 2318  | 32.9768882  | 17.49592262 | 30.44396475 | 7.51030294  |
| ZMYND11  | 10771  | 4336  | 17.62924973 | 16.44521659 | 14.42349847 | 7.423014117 |
| AIMP1    | 9255   | 3159  | 24.13296634 | 19.32768459 | 22.20529939 | 11.85480837 |
| CSNK2A2  | 1459   | 1674  | 45.54124294 | 27.28835148 | 43.79678148 | 20.67821718 |
| ATF6     | 22926  | 2488  | 30.64149545 | 27.76452262 | 32.18525907 | 37.83336868 |
| FAM53C   | 51307  | 4419  | 17.25187614 | 21.68319856 | 20.98981902 | 35.13531068 |
| TRIM65   | 201292 | 3429  | 22.23273277 | 15.59633839 | 17.12953154 | 4.663715419 |
| GDE1     | 51573  | 2960  | 25.75541915 | 22.81023766 | 24.69747548 | 20.31127442 |
| TCEB3    | 6924   | 4959  | 15.37326894 | 12.26725609 | 16.23300949 | 15.22604676 |
| RDX      | 5962   | 4498  | 16.94887521 | 15.90246594 | 16.48753918 | 9.990930986 |
| UTP18    | 51096  | 1893  | 40.27260469 | 26.83880197 | 41.63191547 | 14.65016071 |
| ARIH2    | 10425  | 4081  | 18.63064311 | 26.09998121 | 21.64102677 | 22.66846125 |
| DOK3     | 79930  | 2354  | 32.29891865 | 37.20188832 | 39.49247876 | 47.72643116 |
| XRCC2    | 7516   | 3094  | 24.57390256 | 15.4844949  | 29.91038315 | 5.692085028 |
| CMTM3    | 123920 | 2346  | 32.40905989 | 54.23591773 | 29.08993091 | 53.15267672 |
| CAMSAP1  | 157922 | 7650  | 9.938778368 | 9.204591945 | 9.5837663   | 4.604264334 |
| KCTD9    | 54793  | 3417  | 22.19118184 | 20.73772132 | 21.33252639 | 25.59241112 |
| MRPL49   | 740    | 2119  | 35.78445887 | 30.91685197 | 30.81028375 | 29.9965375  |
| ATP6V1C1 | 528    | 5704  | 13.29370062 | 9.766509675 | 16.11305596 | 17.85093234 |
| MAP4K5   | 11183  | 4435  | 17.0974675  | 17.23373413 | 16.62646713 | 15.10799406 |
| FTSJ3    | 117246 | 3586  | 21.14536206 | 16.77769796 | 24.27476901 | 13.03989608 |
| LOC40139 | 401397 | 1143  | 66.34056723 | 24.36927873 | 51.57344569 | 16.29348678 |
| TAF6     | 6878   | 2787  | 27.20748774 | 21.9874375  | 27.51932844 | 14.30874991 |
| WDR74    | 54663  | 1385  | 54.60135897 | 27.83397434 | 50.18966533 | 16.36969866 |
| ELF4     | 2000   | 4195  | 18.02690874 | 103.9000552 | 23.5712201  | 143.4132493 |
| SHC1     | 6464   | 3496  | 21.6312592  | 22.43624286 | 18.25171566 | 25.41941386 |
| IP6K1    | 9807   | 4468  | 16.92544364 | 10.92219292 | 13.38262924 | 13.68252386 |
| FAM49B   | 51571  | 2219  | 34.07971256 | 69.79212073 | 42.0855631  | 102.5371978 |
| LONRF1   | 91694  | 3584  | 21.10013454 | 13.8648685  | 15.15072089 | 6.382383235 |
| MBD3     | 53615  | 2559  | 29.551732   | 25.77509757 | 29.31070351 | 12.18211993 |
| MBD4     | 8930   | 2470  | 30.61655149 | 36.62755871 | 32.84750946 | 41.30532264 |
| WDR12    | 55759  | 2299  | 32.89381565 | 18.60977619 | 31.98220833 | 6.691863238 |
| MRPS22   | 56945  | 1155  | 65.29739914 | 43.40896456 | 64.75740738 | 30.84630293 |
| UBE2T    | 29089  | 935   | 80.66149306 | 56.24439957 | 73.2152542  | 16.67061224 |
| HNRNPU-A | 284702 | 5079  | 14.84908368 | 11.3631946  | 10.81591612 | 6.496535669 |

|           |        |       |             |             |             |             |
|-----------|--------|-------|-------------|-------------|-------------|-------------|
| USP15     | 9958   | 4611  | 16.35621254 | 22.23010952 | 19.52012759 | 61.59351436 |
| SETDB1    | 9869   | 4449  | 16.95178602 | 19.5335462  | 14.53206046 | 15.42445146 |
| MAP3K7    | 6885   | 2912  | 25.89920879 | 26.01755248 | 23.21810564 | 24.88651543 |
| FYCO1     | 79443  | 8521  | 8.850897313 | 6.302391389 | 7.513118495 | 6.628054543 |
| FUCA2     | 2519   | 2548  | 29.59909576 | 51.77274308 | 33.8320968  | 47.74715331 |
| DBP       | 1628   | 1658  | 45.4876333  | 22.17574969 | 37.84775279 | 12.57549631 |
| SNX13     | 23161  | 6371  | 11.80569924 | 16.26388297 | 11.60723065 | 16.74462577 |
| SCAMP2    | 10066  | 1313  | 57.28416591 | 68.563903   | 68.06812952 | 73.69458986 |
| NUF2      | 83540  | 1989  | 37.81503763 | 29.57658561 | 34.8423337  | 10.78806409 |
| MRP63     | 78988  | 2671  | 28.15953195 | 23.86003289 | 22.54442418 | 11.67130097 |
| DAD1      | 1603   | 711   | 105.7863711 | 77.09822848 | 114.1116011 | 55.23375445 |
| PTOV1     | 53635  | 1884  | 39.92256361 | 36.07429344 | 43.51299756 | 21.27437095 |
| TBC1D24   | 57465  | 6607  | 11.38400331 | 3.102861661 | 8.282541727 | 2.144698109 |
| KIDINS220 | 57498  | 7361  | 10.2179201  | 13.56188599 | 11.53871404 | 41.60778015 |
| GRIN2D    | 2906   | 5109  | 14.68187976 | 39.47222151 | 17.45198068 | 62.76126814 |
| PRKACA    | 5566   | 2689  | 27.89502554 | 19.05969412 | 28.44369045 | 21.68074099 |
| NEDD1     | 121441 | 3977  | 18.86088098 | 13.67140434 | 15.14110058 | 10.7907767  |
| LIMD2     | 80774  | 3232  | 23.20845411 | 58.81073022 | 32.09802532 | 54.55307538 |
| ZYG11B    | 79699  | 8143  | 9.211558845 | 7.470627893 | 10.04141012 | 5.643049477 |
| ANKLE1    | 126549 | 3217  | 23.31666884 | 28.81516843 | 21.21385698 | 9.438709805 |
| RNF123    | 63891  | 4272  | 17.55845592 | 15.49187907 | 14.9363291  | 9.666546827 |
| LTV1      | 84946  | 1835  | 40.87723361 | 36.18754226 | 49.05030427 | 20.07741311 |
| UBR7      | 55148  | 3709  | 20.22370549 | 19.22525185 | 21.8747232  | 10.04230541 |
| C5orf22   | 55322  | 3616  | 20.74383951 | 18.24072862 | 25.94315101 | 20.88107464 |
| PHF19     | 26147  | 4287  | 17.44934395 | 21.46720289 | 20.25613178 | 10.19935489 |
| MAP2K1    | 5604   | 2603  | 28.73812428 | 20.7166768  | 25.48728969 | 30.4848691  |
| SUGT1     | 10910  | 1801  | 41.53544559 | 27.83861969 | 45.40100091 | 18.65807399 |
| ANAPC16   | 119504 | 3277  | 22.82738404 | 34.95148    | 30.17432661 | 25.07968214 |
| NOP10     | 55505  | 552   | 135.5169158 | 136.4446512 | 152.339375  | 209.0298041 |
| LMO2      | 4005   | 2303  | 32.48169236 | 20.22233222 | 30.00005079 | 35.95024097 |
| TFCP2     | 7024   | 3715  | 20.13602625 | 16.25508952 | 19.05259625 | 14.87566072 |
| ARHGAP17  | 55114  | 3480  | 21.49578664 | 19.97810277 | 20.46062201 | 22.10430113 |
| GDI1      | 2664   | 2505  | 29.86241018 | 30.5116211  | 27.66523023 | 37.57661528 |
| LPP       | 4026   | 18278 | 4.092643479 | 5.668957129 | 3.595008249 | 5.083425325 |
| ZNF131    | 7690   | 2415  | 30.97529503 | 23.71345755 | 28.43376706 | 15.67461589 |
| SNHG13    | 57291  | 855   | 87.49162281 | 65.67700182 | 106.2601724 | 11.36442739 |
| PSMC4     | 5704   | 1450  | 51.58988793 | 34.57748556 | 55.6626061  | 29.73610194 |
| SELT      | 51714  | 3498  | 21.38517367 | 24.65301572 | 24.82505344 | 24.88405119 |
| BCKDK     | 10295  | 2190  | 34.06436134 | 37.34228096 | 30.19731977 | 32.07434495 |
| ATF7      | 11016  | 6704  | 11.12782687 | 12.8634023  | 11.12522684 | 12.92356106 |
| HSF1      | 3297   | 2166  | 34.44180579 | 29.52584512 | 36.38467959 | 22.24287598 |
| SIK3      | 23387  | 6072  | 12.28605918 | 16.51428    | 12.10920569 | 23.06995605 |
| UBR3      | 130507 | 7969  | 9.36139432  | 8.416694454 | 10.5788204  | 10.36403264 |
| NOL10     | 79954  | 3495  | 21.34505045 | 13.58036104 | 19.52646006 | 6.660749425 |
| AHSA2     | 130872 | 3059  | 24.38736559 | 24.62159119 | 22.03329156 | 16.94076133 |
| GON4L     | 54856  | 7637  | 9.768358169 | 9.832999183 | 8.936097672 | 11.37121674 |
| PTPN13    | 5783   | 8588  | 8.686650132 | 4.436933988 | 6.568820597 | 1.508552309 |
| ETS1      | 2113   | 5242  | 14.23139095 | 16.06843854 | 21.16072104 | 13.47723639 |
| CST7      | 8530   | 940   | 79.36271419 | 3.081728619 | 61.58726023 | 1.076749271 |
| TMED3     | 23423  | 1435  | 51.98672567 | 46.42994616 | 48.73537004 | 20.87768064 |
| CNPY3     | 10695  | 1783  | 41.84012975 | 67.48718439 | 38.86786412 | 85.03601702 |
| MED4      | 29079  | 2022  | 36.89463469 | 29.09388169 | 41.58819734 | 22.02490101 |
| AP1M1     | 8907   | 2409  | 30.96760122 | 30.80252554 | 30.96036561 | 18.99083563 |
| IDH3G     | 3421   | 1723  | 43.29712788 | 68.93199128 | 36.29732406 | 48.1693754  |
| SSH2      | 85464  | 9166  | 8.138877519 | 7.657898286 | 7.514600939 | 11.35156399 |
| NAA10     | 8260   | 916   | 81.21895761 | 126.9854382 | 86.036262   | 60.99384954 |
| PROSC     | 11212  | 2586  | 28.76897338 | 26.5400104  | 27.37060907 | 19.56968899 |
| CCDC82    | 79780  | 2746  | 27.09270399 | 25.31820744 | 27.69938605 | 33.24669235 |
| SKI       | 6497   | 5707  | 13.03601983 | 7.965282581 | 12.43940421 | 7.555168707 |
| SLU7      | 10569  | 3570  | 20.839374   | 23.71888521 | 23.91009624 | 34.0783604  |
| DHX34     | 9704   | 4390  | 16.90026856 | 13.60345319 | 17.80759948 | 13.55673934 |
| GTPBP1    | 9567   | 5074  | 14.62202976 | 12.77972236 | 11.86759105 | 44.00453998 |

|          |        |      |             |             |             |             |
|----------|--------|------|-------------|-------------|-------------|-------------|
| NET1     | 10276  | 3414 | 21.73174546 | 18.40621473 | 26.24040387 | 12.74815628 |
| PHF8     | 23133  | 6072 | 12.21873831 | 12.7710432  | 9.847428766 | 16.06895783 |
| ARL1     | 400    | 3215 | 23.07688305 | 19.47620044 | 20.24127729 | 13.60019732 |
| PUF60    | 22827  | 1946 | 38.12547739 | 26.56586992 | 41.04092487 | 17.05978085 |
| ALDH9A1  | 223    | 2500 | 29.6768716  | 28.43345057 | 32.70688106 | 16.68013831 |
| TXN2     | 25828  | 1342 | 55.13248348 | 66.25204263 | 51.01062793 | 37.40861253 |
| TONSL    | 4796   | 4519 | 16.37260297 | 10.99616922 | 15.33556135 | 3.941965023 |
| CDC6     | 990    | 3053 | 24.23445556 | 18.24702626 | 26.09051917 | 5.834831294 |
| RERE     | 473    | 8207 | 9.015205658 | 14.091649   | 6.951003481 | 31.00439634 |
| MBD2     | 8932   | 5190 | 14.25583677 | 15.4136674  | 14.69630036 | 16.49853739 |
| MBTD1    | 54799  | 5397 | 13.70905926 | 9.372432729 | 14.71985738 | 5.62614961  |
| KIAA1267 | 284058 | 5357 | 13.81142297 | 12.47896312 | 13.68598324 | 19.15837848 |
| TUBGCP4  | 27229  | 3087 | 23.96753898 | 21.65526577 | 22.17566008 | 10.03291741 |
| REEP3    | 221035 | 5205 | 14.21475367 | 16.65358585 | 16.88654385 | 17.73440183 |
| SLIRP    | 81892  | 436  | 169.2279969 | 97.10598647 | 165.7325422 | 69.64295744 |
| SREK1IP1 | 285672 | 6856 | 10.76187378 | 9.7830569   | 9.707511644 | 5.550849801 |
| ARMC1    | 55156  | 3042 | 24.25490028 | 17.06772372 | 22.85098175 | 9.449342058 |
| FCF1     | 51077  | 2409 | 30.62823025 | 25.16002086 | 33.41614532 | 16.89007947 |
| DPP8     | 54878  | 4096 | 18.01352702 | 18.06163363 | 17.89936821 | 15.02401717 |
| CHAF1A   | 10036  | 3344 | 22.06441587 | 21.39033846 | 22.9987001  | 11.44110499 |
| ZMPSTE24 | 10269  | 3154 | 23.39359755 | 20.91264258 | 26.52782673 | 20.66648506 |
| ACAP1    | 9744   | 2523 | 29.24431497 | 37.44790263 | 36.00968981 | 32.49452616 |
| ATAD3A   | 55210  | 2656 | 27.77989709 | 17.95413951 | 30.54719441 | 6.783196085 |
| THUMPD3  | 25917  | 3980 | 18.48719108 | 18.64404121 | 15.44820743 | 13.12227303 |
| RAP1A    | 5906   | 1906 | 38.60389323 | 61.7290963  | 51.87894455 | 89.74417062 |
| SARNP    | 84324  | 1195 | 61.57240209 | 51.83890072 | 63.47383207 | 43.1961172  |
| MBOAT7   | 79143  | 2615 | 28.13729273 | 29.56900253 | 32.64208168 | 66.41834203 |
| AIP      | 9049   | 1250 | 58.8632164  | 57.75823189 | 49.01806464 | 58.62339871 |
| RSBN1L   | 222194 | 3220 | 22.85062748 | 18.40791744 | 23.42504963 | 32.43891096 |
| DEF6     | 50619  | 2320 | 31.71509504 | 47.44799408 | 32.23914031 | 36.90836596 |
| REPS1    | 85021  | 3548 | 20.73816812 | 21.16533674 | 20.78308391 | 14.26358955 |
| MCM10    | 55388  | 4562 | 16.08387425 | 11.96712139 | 18.47931166 | 4.881011601 |
| DIABLO   | 56616  | 2265 | 32.39498204 | 25.2838852  | 32.18244709 | 24.93494603 |
| FBXL19   | 54620  | 3814 | 19.23823658 | 18.9881024  | 18.66884231 | 14.59568362 |
| KIAA0195 | 9772   | 5472 | 13.40910715 | 13.68270871 | 13.39835749 | 16.05521318 |
| KCTD10   | 83892  | 4057 | 18.08593402 | 21.75049129 | 20.88370454 | 15.46782044 |
| SMPD4    | 55627  | 4913 | 14.93479225 | 9.887548397 | 14.01970938 | 5.026729347 |
| TCF20    | 6942   | 7407 | 9.906120471 | 9.83748993  | 10.12637914 | 8.417455082 |
| SERTAD2  | 9792   | 5565 | 13.18501965 | 16.13685031 | 13.85785048 | 16.58716289 |
| EMB      | 133418 | 4309 | 17.02822797 | 19.08221413 | 17.01457698 | 18.60334874 |
| DPP7     | 29952  | 1633 | 44.93241539 | 42.437823   | 41.01486182 | 30.24656617 |
| C16orf53 | 79447  | 3843 | 19.09306124 | 11.77076112 | 17.70327691 | 6.320963714 |
| DHX33    | 56919  | 5635 | 13.02123058 | 8.106601663 | 14.47309989 | 4.095277795 |
| C1GALT1  | 56913  | 6234 | 11.77007288 | 13.15406288 | 9.015358762 | 28.93232546 |
| RNF114   | 55905  | 2478 | 29.61042548 | 31.11384541 | 25.57926893 | 62.9833145  |
| FAM162A  | 26355  | 838  | 87.55922951 | 60.6275085  | 82.44644029 | 33.57710257 |
| MPZL1    | 9019   | 5026 | 14.55834623 | 5.364654766 | 11.89685385 | 6.766424388 |
| FTSJD2   | 23070  | 4137 | 17.6867895  | 14.21992477 | 15.67909638 | 54.60735099 |
| PLAA     | 9373   | 4954 | 14.76993302 | 12.23465689 | 14.8846148  | 18.51035021 |
| PHF10    | 55274  | 1692 | 43.24482752 | 28.57842352 | 38.33594665 | 9.810382247 |
| CCNT2    | 905    | 6923 | 10.56915328 | 9.720564898 | 10.19342919 | 11.92994021 |
| BRCC3    | 79184  | 2937 | 24.91326121 | 27.38937664 | 27.48068738 | 18.95401339 |
| NPTN     | 27020  | 2454 | 29.81672704 | 47.39961754 | 32.02849683 | 84.05664684 |
| TBC1D14  | 57533  | 5009 | 14.60775567 | 10.36534549 | 13.49792846 | 7.718888565 |
| RBM34    | 23029  | 1870 | 39.12847495 | 31.3395701  | 42.25695227 | 45.24880466 |
| KIAA0564 | 23078  | 7169 | 10.20647903 | 8.299111009 | 9.077375715 | 3.557823508 |
| BIN2     | 51411  | 2228 | 32.74948922 | 52.10764307 | 73.77896963 | 116.3875105 |
| KIAA0907 | 22889  | 2960 | 24.65062905 | 23.33720685 | 22.4133159  | 18.80673558 |
| SMCR7L   | 54471  | 5730 | 12.73400733 | 15.82773171 | 13.12694154 | 9.361893313 |
| UFC1     | 51506  | 1124 | 64.91624732 | 89.4106235  | 71.99471851 | 69.33728847 |
| RNF220   | 55182  | 3025 | 24.12094611 | 22.9094099  | 24.30647833 | 15.79279724 |
| ORC4     | 5000   | 6710 | 10.87419702 | 10.19517649 | 10.04468538 | 10.5890508  |

|          |        |       |             |             |             |             |
|----------|--------|-------|-------------|-------------|-------------|-------------|
| INTS3    | 65123  | 4538  | 16.07885897 | 21.01639248 | 19.08919175 | 15.34498212 |
| YTHDF1   | 54915  | 3277  | 22.26605493 | 18.97171774 | 20.69649326 | 15.87556234 |
| RPF1     | 80135  | 1975  | 36.94474025 | 30.12472244 | 38.61964499 | 22.24155102 |
| TATDN2   | 9797   | 4909  | 14.82205659 | 15.34272712 | 15.58058334 | 18.63879529 |
| ACO2     | 50     | 2744  | 26.51657282 | 30.29030299 | 25.40961051 | 19.6232061  |
| C22orf13 | 83606  | 3619  | 20.10540918 | 23.45931276 | 20.14181892 | 22.9333611  |
| TTL      | 150465 | 5181  | 14.04390578 | 7.311630266 | 10.88844456 | 4.6885666   |
| PDZD8    | 118987 | 3853  | 18.88436954 | 46.78734543 | 27.74723313 | 17.49514959 |
| KBTBD2   | 25948  | 3710  | 19.61225763 | 20.42132421 | 21.12847614 | 26.84501363 |
| SGTA     | 6449   | 2358  | 30.85728406 | 25.04268934 | 29.74832094 | 15.62428035 |
| USP37    | 57695  | 8032  | 9.058948683 | 7.795814792 | 9.996041997 | 6.225090781 |
| AP3S1    | 1176   | 1313  | 55.41620398 | 101.8275787 | 60.98775671 | 90.96194146 |
| TBC1D10B | 26000  | 3326  | 21.8765712  | 26.32989931 | 19.69280698 | 32.92664307 |
| GTF3C4   | 9329   | 3866  | 18.76800043 | 10.49031263 | 13.99092057 | 6.440442355 |
| RHOQ     | 23433  | 4542  | 15.9747005  | 22.32251686 | 14.46709837 | 25.89413681 |
| ASH2L    | 9070   | 2662  | 27.25660768 | 35.57621751 | 27.70036879 | 26.38723345 |
| SENP1    | 29843  | 4726  | 15.35274855 | 13.10780498 | 16.54154924 | 12.07891226 |
| N4BP1    | 9683   | 7121  | 10.18917142 | 8.605390859 | 9.969341359 | 37.2962601  |
| ERAL1    | 26284  | 1856  | 39.09325951 | 33.25681771 | 38.24982749 | 20.61371503 |
| TGS1     | 96764  | 3708  | 19.56771566 | 16.34587116 | 20.74100678 | 10.42716096 |
| SSH1     | 54434  | 8537  | 8.499131973 | 8.900778435 | 8.662254478 | 11.14461352 |
| EFTUD1   | 79631  | 3685  | 19.68984794 | 15.29896044 | 18.7490141  | 15.60103041 |
| BTF3L4   | 91408  | 2345  | 30.85403134 | 35.34915084 | 33.15684102 | 23.56634524 |
| NDUFS3   | 4722   | 971   | 74.51359782 | 56.68349447 | 76.81104095 | 36.48305975 |
| KIAA0922 | 23240  | 5034  | 14.37280562 | 12.74847302 | 12.12977672 | 16.72832876 |
| PNKD     | 25953  | 3129  | 23.12326733 | 15.31129026 | 20.86512984 | 17.01463437 |
| TRAK1    | 22906  | 5123  | 14.12311214 | 21.18280646 | 14.43483632 | 19.0061064  |
| SNRPG    | 6637   | 606   | 119.3939001 | 108.8423675 | 127.9562829 | 76.82943644 |
| PRDM2    | 7799   | 7970  | 9.078130927 | 10.0931743  | 9.914742879 | 10.41352996 |
| TMED4    | 222068 | 1048  | 68.84381424 | 68.46576764 | 63.90960816 | 62.00349715 |
| ACBD3    | 64746  | 3581  | 20.14753346 | 17.11225588 | 21.41758402 | 19.78500476 |
| RNF130   | 55819  | 1865  | 38.68542484 | 6.690954609 | 45.42905593 | 19.6459111  |
| PPP1R10  | 5514   | 4540  | 15.89169985 | 16.98240285 | 15.96270334 | 16.0516279  |
| GOLM1    | 51280  | 3100  | 23.27365075 | 19.76741558 | 33.87371819 | 16.3249083  |
| TMEM214  | 54867  | 3064  | 23.48039528 | 21.89054769 | 22.13525078 | 13.60977342 |
| PNPO     | 55163  | 3482  | 20.66166891 | 23.03841657 | 18.38577906 | 19.88244432 |
| FOXN3    | 1112   | 7907  | 9.098764532 | 6.594517292 | 10.84881916 | 5.862679855 |
| SEPHS1   | 22929  | 3275  | 21.96761257 | 13.06377877 | 23.03165185 | 5.748361605 |
| BTN3A2   | 11118  | 4096  | 17.51453735 | 20.78175917 | 13.77271272 | 29.60324436 |
| DNAJC11  | 55735  | 3316  | 21.63436218 | 17.3374043  | 23.44776604 | 8.790638198 |
| GOLIM4   | 27333  | 2838  | 25.27820472 | 23.94783962 | 22.18564443 | 7.632095961 |
| LSM5     | 23658  | 3022  | 23.73909496 | 16.66452242 | 24.82001664 | 8.641073237 |
| TMEM170  | 1E+08  | 8362  | 8.579232837 | 8.660681959 | 12.02721196 | 16.77627386 |
| VAMP3    | 9341   | 2225  | 32.24249213 | 34.75188387 | 23.26506361 | 27.93063412 |
| CTNNA1   | 8727   | 2445  | 29.34132719 | 15.22006477 | 22.46790918 | 1.738652811 |
| KIAA2018 | 205717 | 13708 | 5.233407133 | 6.24217617  | 4.778105925 | 4.947014086 |
| MRPL17   | 63875  | 2366  | 30.32102493 | 37.4841118  | 27.95102718 | 28.31950703 |
| ARL6IP5  | 10550  | 2135  | 33.60166041 | 46.54959129 | 40.27770392 | 33.27987396 |
| SHKBP1   | 92799  | 2379  | 30.15533627 | 35.40594991 | 28.50878873 | 38.12027348 |
| TXNL1    | 9352   | 1434  | 49.88504799 | 49.41477946 | 55.54697004 | 34.44396273 |
| C20orf11 | 54994  | 4440  | 16.11152226 | 12.99857328 | 16.84567692 | 10.25821941 |
| C4orf46  | 201725 | 3525  | 20.29366208 | 9.671886742 | 20.49911727 | 4.019863945 |
| CLPP     | 8192   | 1194  | 59.91219331 | 48.52303018 | 54.32531134 | 27.2956842  |
| C5orf42  | 65250  | 11217 | 6.377387788 | 5.939821052 | 5.650836089 | 4.583839814 |
| KCNQ5    | 56479  | 6652  | 10.75393247 | 8.14015971  | 9.846403491 | 2.038895643 |
| PCCB     | 5096   | 1885  | 37.8412587  | 33.809097   | 40.35146636 | 15.571451   |
| CCDC137  | 339230 | 2109  | 33.82208281 | 24.09001997 | 28.55199478 | 12.28586745 |
| PLEKHA2  | 59339  | 5656  | 12.61152275 | 40.5007072  | 12.51421412 | 36.25538157 |
| PLAC8    | 51316  | 1442  | 49.46655523 | 62.12117841 | 46.00791614 | 101.9163346 |
| REV3L    | 5980   | 10719 | 6.654610752 | 6.13262823  | 6.465286102 | 3.04049323  |
| ORMDL1   | 94101  | 2185  | 32.64566254 | 29.06513279 | 32.39377348 | 25.94054079 |
| PRDM4    | 11108  | 4225  | 16.88302311 | 15.40050744 | 15.35252586 | 13.36749178 |

|          |        |       |             |             |             |             |
|----------|--------|-------|-------------|-------------|-------------|-------------|
| SLC39A11 | 201266 | 2799  | 25.48437751 | 10.429111   | 25.43871546 | 10.55899035 |
| UPF3A    | 65110  | 2402  | 29.69640826 | 59.7436507  | 29.55523723 | 32.02454951 |
| PSMG1    | 8624   | 1146  | 62.24325711 | 34.80545425 | 73.37812829 | 13.07132274 |
| NDUFA4   | 4697   | 2058  | 34.66023938 | 44.06846584 | 36.24077782 | 34.42667737 |
| PTAR1    | 375743 | 10057 | 7.092649164 | 6.912975802 | 6.659766267 | 5.434602068 |
| CDK9     | 1025   | 2472  | 28.77281006 | 39.48249026 | 24.61570035 | 35.86724999 |
| ACOT7    | 11332  | 1814  | 39.20969486 | 21.12856768 | 35.6412001  | 3.905738811 |
| METTL16  | 79066  | 5758  | 12.35262009 | 8.784824494 | 10.01749563 | 3.972640068 |
| TMCO3    | 55002  | 3102  | 22.9292026  | 14.58253869 | 22.5452147  | 13.70408163 |
| ZNF282   | 8427   | 3736  | 19.03811201 | 16.70052241 | 17.87098089 | 11.5952293  |
| KLHL8    | 57563  | 4576  | 15.54335369 | 10.8591977  | 14.0825726  | 10.30723887 |
| ADH5     | 128    | 2644  | 26.90105389 | 15.33870977 | 29.24743671 | 12.63266354 |
| PEX19    | 5824   | 3722  | 19.05480933 | 14.24883906 | 16.40550673 | 15.77226498 |
| SLC19A1  | 6573   | 2873  | 24.6856945  | 19.00243918 | 24.48932319 | 8.807381785 |
| CBFA2T3  | 863    | 4372  | 16.22186649 | 10.1426588  | 15.89951658 | 5.232036028 |
| YY1AP1   | 55249  | 3091  | 22.9446782  | 24.3666928  | 23.03557573 | 25.86845709 |
| CRCP     | 27297  | 2925  | 24.24683771 | 31.15848481 | 25.35417136 | 25.19114739 |
| BRK1     | 55845  | 1197  | 59.2497914  | 55.66163136 | 57.36637213 | 52.42518589 |
| RSU1     | 6251   | 3769  | 18.81719297 | 7.331189416 | 18.38721192 | 5.04863707  |
| CTSD     | 1509   | 2141  | 33.12564237 | 559.4234846 | 36.31611031 | 2028.070579 |
| RBL1     | 5933   | 4270  | 16.60936775 | 14.71635061 | 15.48761834 | 8.343672103 |
| KIAA1524 | 57650  | 4284  | 16.55508877 | 26.47568547 | 18.79073158 | 17.81411796 |
| GLB1     | 2720   | 2588  | 27.40417323 | 32.2883527  | 25.63501355 | 39.73487727 |
| FBXO9    | 26268  | 4688  | 15.12841304 | 14.97275932 | 15.00806859 | 9.067845823 |
| BABAM1   | 29086  | 1451  | 48.87801538 | 51.13941008 | 53.73127288 | 38.78375183 |
| ATP5G1   | 516    | 663   | 106.9713429 | 80.99951285 | 101.6588822 | 32.9748374  |
| C2orf28  | 51374  | 1278  | 55.33459636 | 52.83122338 | 55.3837207  | 34.37172399 |
| GMFB     | 2764   | 4125  | 17.14366403 | 18.96103572 | 18.13207407 | 28.85531428 |
| ATP6V1B2 | 526    | 3054  | 23.15573482 | 23.93225953 | 26.15115907 | 54.61734875 |
| C4orf41  | 60684  | 4561  | 15.50484853 | 17.97904582 | 17.46423044 | 19.35079681 |
| PPPDE1   | 51029  | 4093  | 17.27769708 | 11.0518043  | 20.1838118  | 10.68278387 |
| DPAGT1   | 1798   | 2150  | 32.89191355 | 30.16014477 | 29.38332263 | 13.18141433 |
| MTMR6    | 9107   | 5222  | 13.54224706 | 13.99638464 | 11.57170466 | 18.76207768 |
| IER2     | 9592   | 2088  | 33.77070305 | 29.88177765 | 36.63078717 | 44.20860225 |
| TERF2    | 7014   | 2979  | 23.67010003 | 17.95228074 | 21.77389115 | 13.72629416 |
| RPAP1    | 26015  | 4698  | 15.00920136 | 9.913161156 | 13.35708261 | 6.463245944 |
| SRP54    | 6729   | 2298  | 30.68460747 | 32.58128028 | 34.84635533 | 48.88947735 |
| ERLEC1   | 27248  | 3121  | 22.59315219 | 17.34967715 | 22.20487079 | 17.96629127 |
| APOA1BP  | 128240 | 1121  | 62.90207669 | 50.09262851 | 53.90494358 | 20.40540724 |
| SMARCB1  | 6598   | 1717  | 41.06769247 | 28.81121492 | 41.83856661 | 15.68027884 |
| NCF4     | 4689   | 1646  | 42.83914215 | 68.2306641  | 60.33039966 | 88.42427246 |
| RIN3     | 79890  | 3869  | 18.22518169 | 28.85478807 | 21.29776607 | 76.28360873 |
| CCDC90A  | 63933  | 5472  | 12.88618932 | 9.447584587 | 13.97753721 | 5.918972601 |
| C5orf13  | 9315   | 2304  | 30.60469964 | 24.08217817 | 31.82109904 | 12.47608444 |
| CES1     | 1066   | 2027  | 34.78698963 | 103.2263892 | 43.67455107 | 188.9469209 |
| LPCAT4   | 254531 | 1908  | 36.8494978  | 22.89056929 | 27.13038078 | 12.62528024 |
| UNC119B  | 84747  | 4811  | 14.61418454 | 14.03415163 | 14.05344495 | 6.10105698  |
| RPA2     | 6118   | 1741  | 40.38417106 | 42.23709705 | 50.72776005 | 21.27770357 |
| MRAS     | 22808  | 4454  | 15.78555047 | 7.954736613 | 16.98247521 | 7.135458348 |
| PURA     | 5813   | 5304  | 13.25581482 | 11.38530497 | 11.35297077 | 11.22060439 |
| PLIN3    | 10226  | 2345  | 29.98244853 | 38.19988881 | 29.28253622 | 40.39944898 |
| GATAD1   | 57798  | 3955  | 17.777204   | 22.98754371 | 17.62932269 | 19.44954941 |
| SPOP     | 8405   | 3105  | 22.64374937 | 18.73086336 | 22.52343189 | 17.27653742 |
| METTL21A | 151194 | 4805  | 14.63243326 | 17.11243718 | 16.00575508 | 15.62978318 |
| ZWILCH   | 55055  | 3289  | 21.31482385 | 18.15723913 | 25.76016701 | 10.52457755 |
| PHKA2    | 5256   | 5325  | 13.16515599 | 18.16138689 | 15.39502111 | 19.23549383 |
| ZBTB33   | 10009  | 5324  | 13.16762878 | 12.72372956 | 12.50088276 | 23.53558718 |
| ARPC1A   | 10552  | 1631  | 42.98249886 | 59.84102754 | 41.32424211 | 60.81553823 |
| PAM      | 5066   | 5359  | 13.08163009 | 14.30387079 | 12.97120479 | 19.45341751 |
| C2orf3   | 57136  | 2251  | 31.1436942  | 20.09552866 | 40.26706469 | 13.4892623  |
| ATP11C   | 286410 | 6128  | 11.4066693  | 12.47252136 | 11.44688981 | 9.579694885 |
| EDC3     | 80153  | 4086  | 17.1072123  | 14.83369805 | 16.28847279 | 12.28643123 |



|           |        |       |             |             |             |             |
|-----------|--------|-------|-------------|-------------|-------------|-------------|
| ANKZF1    | 55139  | 2594  | 26.94682709 | 34.27534357 | 27.93780769 | 25.75232258 |
| PPPDE2    | 27351  | 3804  | 18.37541258 | 21.32258077 | 18.99563312 | 27.56523423 |
| PIP4K2A   | 5305   | 3833  | 18.2363865  | 15.58026598 | 18.41093407 | 14.41770926 |
| HMHA1     | 23526  | 4349  | 16.07267636 | 38.0695987  | 13.79739532 | 36.02665899 |
| HIRA      | 7290   | 4013  | 17.41840754 | 16.32514561 | 19.90172933 | 27.64291475 |
| ANAPC4    | 29945  | 2701  | 25.87932968 | 22.77001888 | 26.20525548 | 18.28679843 |
| FBXO45    | 200933 | 5743  | 12.17135112 | 9.079374583 | 13.79623638 | 5.357685386 |
| GNPNAT1   | 64841  | 3945  | 17.71864879 | 10.788604   | 16.5493007  | 3.643206406 |
| SLC1A4    | 6509   | 4611  | 15.1594165  | 3.527821728 | 12.05115859 | 1.931656901 |
| POLR2G    | 5436   | 852   | 81.80244519 | 87.09305636 | 84.06752829 | 60.82369591 |
| FANCA     | 2175   | 5460  | 12.76477716 | 13.26385028 | 11.72514335 | 11.97518731 |
| MRPS10    | 55173  | 2167  | 32.1622904  | 30.02637007 | 33.54035898 | 22.41944029 |
| CHMP2A    | 27243  | 928   | 75.10310701 | 101.5713638 | 68.75861846 | 64.78596153 |
| ATL2      | 64225  | 3444  | 20.23684184 | 15.91662034 | 22.45360704 | 9.698246919 |
| TSC2      | 7249   | 5675  | 12.28117767 | 10.9551223  | 10.90862292 | 7.455089402 |
| FASTKD2   | 22868  | 6945  | 10.00594631 | 9.304748535 | 9.218039265 | 3.789165181 |
| UBE2H     | 7328   | 5174  | 13.43086531 | 16.02121351 | 14.98676216 | 33.9598479  |
| LSS       | 4047   | 4390  | 15.82945265 | 23.70452478 | 13.52414987 | 8.991714869 |
| VAV1      | 7409   | 2888  | 24.0620835  | 54.08785042 | 26.55691426 | 58.31745636 |
| GGA3      | 23163  | 4091  | 16.98638405 | 20.20799952 | 15.39057905 | 14.94341643 |
| KIF18A    | 81930  | 3463  | 20.06679097 | 15.37886562 | 16.59528013 | 8.359031881 |
| NFRKB     | 4798   | 5068  | 13.71177923 | 12.17929236 | 13.96613951 | 10.22529379 |
| WDR41     | 55255  | 2608  | 26.64543602 | 23.66742856 | 20.41555209 | 15.44606738 |
| C19orf10  | 56005  | 1067  | 65.12773865 | 54.29849862 | 60.19734532 | 46.67057197 |
| PCMT1     | 5110   | 1751  | 39.68663457 | 18.32547493 | 39.21618929 | 23.69955277 |
| RAD18     | 56852  | 5739  | 12.10860727 | 8.852736038 | 13.54814291 | 4.444334681 |
| MESDC2    | 23184  | 4243  | 16.37786876 | 14.96755012 | 17.12985103 | 12.88140302 |
| TAOK2     | 9344   | 4920  | 14.12424739 | 15.80662743 | 13.7420983  | 14.60614763 |
| CTSA      | 5476   | 2300  | 30.21360745 | 53.09230923 | 47.8605916  | 132.7229241 |
| SPARC     | 6678   | 3178  | 21.80204876 | 8.694541507 | 11.90055767 | 2.356786636 |
| HEATR2    | 54919  | 3424  | 20.23566325 | 12.88576857 | 17.15454546 | 2.956028957 |
| HAX1      | 10456  | 1196  | 57.9321998  | 66.70075346 | 58.47429432 | 69.22525497 |
| ZZEF1     | 23140  | 11412 | 6.071408252 | 6.092165934 | 5.517250165 | 6.917915926 |
| CNN2      | 1265   | 2478  | 27.9608196  | 49.6382736  | 33.84989922 | 38.39449782 |
| TTI1      | 9675   | 3931  | 17.62577231 | 14.79504724 | 16.93073005 | 7.415353922 |
| NMI       | 9111   | 1501  | 46.02433364 | 77.93948001 | 45.88862905 | 163.4535522 |
| GOLGA8A   | 23015  | 6526  | 10.58573779 | 10.75579156 | 11.00778714 | 7.816744325 |
| LOC646214 | 646214 | 8226  | 8.398070119 | 9.31855623  | 8.142143126 | 10.4585785  |
| TRIM13    | 10206  | 7311  | 9.44912116  | 6.918755223 | 7.398290098 | 5.094639691 |
| ACAT2     | 39     | 1567  | 44.08584863 | 46.64270619 | 35.3264885  | 30.48705275 |
| MAN2C1    | 4123   | 3254  | 21.23003221 | 26.02225575 | 18.31048024 | 17.1697499  |
| SAMD9L    | 219285 | 7133  | 9.68491866  | 21.99273939 | 7.434806547 | 227.317425  |
| PDE4A     | 5141   | 4794  | 14.41020542 | 1.440928917 | 12.78109737 | 3.589164237 |
| MGAT4B    | 11282  | 2922  | 23.64220561 | 31.80055768 | 30.73101423 | 38.2411815  |
| RFC5      | 5985   | 2486  | 27.70641136 | 26.98014405 | 33.91094923 | 10.66700766 |
| USP28     | 57646  | 4642  | 14.83803073 | 9.93674402  | 15.88504561 | 12.86439349 |
| IQCB1     | 9657   | 2594  | 26.55286763 | 24.39648515 | 20.44428493 | 16.23176696 |
| RWDD1     | 51389  | 1323  | 52.06208513 | 46.14977749 | 57.33275082 | 22.49209588 |
| CDK2      | 1017   | 2325  | 29.62500586 | 21.66029538 | 31.715433   | 15.84604433 |
| LIMS1     | 3987   | 4690  | 14.68617028 | 23.85117436 | 21.30867636 | 45.10408567 |
| BAHD1     | 22893  | 4544  | 15.15804107 | 13.38761508 | 12.83331737 | 10.7362139  |
| NFKB2     | 4791   | 3128  | 22.01986529 | 29.99122771 | 24.72193819 | 32.2281246  |
| PRKCI     | 5584   | 4884  | 14.10281299 | 9.991883284 | 12.80513705 | 7.336181151 |
| IRF7      | 3665   | 2051  | 33.58271021 | 17.16604787 | 25.23879402 | 237.8613163 |
| LRRC47    | 57470  | 2694  | 25.5672378  | 17.61817441 | 21.01867708 | 9.993704073 |
| MCRS1     | 10445  | 1937  | 35.5591836  | 29.68034727 | 35.34138497 | 19.7517063  |
| SNHG3     | 8420   | 2346  | 29.35982039 | 22.70119849 | 33.14270766 | 6.64408459  |
| C3orf17   | 25871  | 4857  | 14.18121034 | 14.45178005 | 15.00787372 | 12.21158263 |
| GNB5      | 10681  | 3084  | 22.33402679 | 5.057810613 | 18.97726294 | 3.41319743  |
| CEP192    | 55125  | 7995  | 8.58958755  | 10.36819997 | 7.901706522 | 7.469232592 |
| KCMF1     | 56888  | 7555  | 9.089841491 | 10.1461871  | 9.76020936  | 8.359735968 |
| UQCRH     | 7388   | 546   | 125.7761034 | 119.1705933 | 107.1902544 | 61.17355749 |

|          |        |       |             |             |             |             |
|----------|--------|-------|-------------|-------------|-------------|-------------|
| APOOL    | 139322 | 6468  | 10.61746327 | 9.095211622 | 9.1138603   | 5.383080462 |
| MLLT10   | 8028   | 5137  | 13.36845483 | 10.45409325 | 12.70916707 | 9.221014976 |
| NIP7     | 51388  | 2328  | 29.49903456 | 17.70792383 | 26.22907905 | 9.477983704 |
| IFRD2    | 7866   | 2129  | 32.25634216 | 21.14241537 | 27.39060316 | 4.944246535 |
| ZNF33A   | 7581   | 6130  | 11.202896   | 12.32304733 | 11.20188376 | 9.54354672  |
| ZNF516   | 9658   | 8626  | 7.937556955 | 5.011539629 | 7.519640823 | 5.890290355 |
| CDK2AP1  | 8099   | 1627  | 42.08319994 | 27.25488891 | 38.56888391 | 16.54765751 |
| CHTOP    | 26097  | 2175  | 31.48016841 | 32.27231986 | 33.7084194  | 24.94295875 |
| VAPB     | 9217   | 7949  | 8.613582374 | 6.924100281 | 8.638513957 | 5.882635217 |
| FBXW11   | 23291  | 4575  | 14.9659817  | 14.02750015 | 13.11581907 | 12.74306285 |
| FAM98A   | 25940  | 2745  | 24.94330284 | 13.47549205 | 20.01239998 | 8.18564801  |
| RAD54L   | 8438   | 3164  | 21.64012841 | 13.73336711 | 21.63598694 | 5.822069067 |
| BFAR     | 51283  | 3060  | 22.3756099  | 18.64221153 | 23.40703729 | 17.59675737 |
| PFDN1    | 5201   | 1324  | 51.71402288 | 51.66890802 | 45.16131984 | 78.73932358 |
| RNGTT    | 8732   | 4463  | 15.34155642 | 11.33386051 | 13.53964637 | 7.166426248 |
| WIZ      | 58525  | 4185  | 16.360661   | 15.01524901 | 13.93419215 | 8.948468255 |
| CHCHD8   | 51287  | 833   | 82.196118   | 65.53902492 | 81.41945786 | 41.55502469 |
| ADAM9    | 8754   | 4111  | 16.65516086 | 7.913785447 | 18.34800774 | 20.18872143 |
| RFT1     | 91869  | 5112  | 13.393851   | 13.20780584 | 12.35800932 | 6.335801657 |
| -        | 151162 | 5251  | 13.03930038 | 11.41534797 | 11.82969336 | 7.517354461 |
| NDUFA12  | 55967  | 600   | 113.7749669 | 102.1316472 | 117.2630426 | 60.72865889 |
| PTPN1    | 5770   | 3318  | 20.57413506 | 26.52770056 | 24.96191273 | 35.87346938 |
| FAM53B   | 9679   | 5740  | 11.89285368 | 13.82028498 | 11.37404029 | 18.23270421 |
| IMP3     | 55272  | 1255  | 54.39440648 | 41.19297439 | 57.40884751 | 19.35574785 |
| BUD31    | 8896   | 1060  | 64.40092465 | 59.91256146 | 75.94291894 | 56.90924638 |
| RC3H1    | 149041 | 10996 | 6.208164799 | 7.052180274 | 6.45613676  | 8.413058419 |
| SLMO2    | 51012  | 2581  | 26.44904306 | 29.35417002 | 24.55847672 | 19.05858725 |
| CTSS     | 1520   | 4107  | 16.62161678 | 31.84874262 | 16.05085112 | 132.4881382 |
| TMEM165  | 55858  | 1983  | 34.42510344 | 31.91350603 | 36.3328813  | 38.07663433 |
| MTO1     | 25821  | 3048  | 22.39664702 | 14.47535157 | 22.32076547 | 7.239089915 |
| MMADHC   | 27249  | 1466  | 46.56547075 | 55.02416908 | 54.91097823 | 42.52939276 |
| CEBPA    | 1050   | 2591  | 26.34696261 | 28.29484882 | 41.50673236 | 14.45362395 |
| REEP4    | 80346  | 1731  | 39.43673029 | 29.22184832 | 33.32220673 | 12.62987706 |
| TBL2     | 26608  | 3041  | 22.38099111 | 40.96135178 | 21.26048569 | 69.16264012 |
| C15orf24 | 56851  | 1075  | 63.31218043 | 65.29515878 | 66.82494778 | 83.60782805 |
| MIER1    | 57708  | 5646  | 12.0546571  | 16.7341584  | 10.8898097  | 22.73111922 |
| GABARAP  | 11337  | 924   | 73.65865147 | 109.4870551 | 81.40408555 | 134.9525753 |
| GLS      | 2744   | 4348  | 15.65331048 | 20.80728381 | 19.68038831 | 29.61010967 |
| THOP1    | 7064   | 2568  | 26.50334656 | 20.7387117  | 26.73969916 | 6.779159741 |
| MSL2     | 55167  | 4696  | 14.49331217 | 11.5781889  | 15.34244115 | 12.37161066 |
| FEM1B    | 10116  | 2583  | 26.3494363  | 16.73617532 | 20.77674386 | 20.92470244 |
| ATP6V0A2 | 23545  | 6550  | 10.39093038 | 8.266922503 | 11.96742694 | 7.108189081 |
| GTF3C6   | 112495 | 957   | 71.11869797 | 64.96376076 | 70.64903201 | 37.43982105 |
| NBR1     | 4077   | 4995  | 13.62574454 | 19.04896024 | 12.98587022 | 25.491042   |
| LRRC41   | 10489  | 2960  | 22.9934439  | 24.76755178 | 21.27123611 | 17.98607803 |
| TNRC6B   | 23112  | 18297 | 3.719767938 | 4.615706811 | 3.741392725 | 5.27728959  |
| NDUFA9   | 4704   | 1621  | 41.86070808 | 35.32880936 | 37.01719446 | 36.09003171 |
| CLK2     | 1196   | 2175  | 31.19825646 | 38.11207298 | 34.38841633 | 20.56863389 |
| SLC4A2   | 6522   | 4943  | 13.72773777 | 14.06510169 | 15.38792516 | 16.25819514 |
| PRDX5    | 25824  | 913   | 74.32224292 | 158.8872703 | 75.67373162 | 113.2980821 |
| SMC6     | 79677  | 5275  | 12.86373607 | 11.78584247 | 15.78126938 | 7.32965172  |
| C19orf6  | 91304  | 2754  | 24.63914589 | 26.05378522 | 26.31469613 | 32.85610085 |
| RFC4     | 5984   | 1486  | 45.66366608 | 34.78949048 | 46.35183863 | 14.57596792 |
| FBXO11   | 80204  | 4070  | 16.67228693 | 20.69551716 | 19.46726917 | 28.94683003 |
| AKAP10   | 11216  | 2929  | 23.16702212 | 29.59437158 | 22.07345066 | 38.01156525 |
| C11orf48 | 79081  | 1357  | 50.00457464 | 51.23345441 | 63.99265801 | 39.23271257 |
| HLA-C    | 3107   | 1543  | 43.97680349 | 142.971068  | 58.60653134 | 559.9263688 |
| WDR48    | 57599  | 3705  | 18.31476594 | 12.32947378 | 18.93293948 | 13.05816417 |
| IFIT3    | 3437   | 2552  | 26.50933449 | 30.91017649 | 18.2969954  | 1127.160714 |
| AKAP17A  | 8227   | 3287  | 20.58163116 | 17.69374223 | 23.39752149 | 28.51370963 |
| PSMG2    | 56984  | 1141  | 59.29169292 | 45.11336562 | 55.36734763 | 32.46668004 |
| NKRF     | 55922  | 3747  | 18.05492971 | 17.84088749 | 18.55155764 | 9.562292165 |

|           |          |       |             |             |             |             |
|-----------|----------|-------|-------------|-------------|-------------|-------------|
| TMEM14B   | 81853    | 989   | 68.40426858 | 47.09002135 | 65.37223152 | 31.11141271 |
| DCTN2     | 10540    | 1757  | 38.50416712 | 37.28674406 | 35.83543477 | 28.57277064 |
| DHPS      | 1725     | 1361  | 49.7074369  | 41.58670237 | 41.76017693 | 28.70592987 |
| RSBN1     | 54665    | 6604  | 10.24406748 | 8.064356701 | 12.18950546 | 7.755073036 |
| ATG2B     | 55102    | 11099 | 6.095307832 | 4.135826025 | 6.301041176 | 3.228210536 |
| DHX8      | 1659     | 4201  | 16.05509056 | 22.86143469 | 16.79816955 | 24.86391176 |
| FASTKD1   | 79675    | 3020  | 22.3335879  | 27.96476408 | 21.26839982 | 17.42765045 |
| UBE3B     | 89910    | 5753  | 11.72387197 | 14.37005493 | 11.45851652 | 13.82835792 |
| MAN1A2    | 10905    | 5388  | 12.51808379 | 11.58002074 | 11.05833384 | 8.152758586 |
| AZU1      | 566      | 912   | 73.95552133 | 168.1018499 | 41.46926785 | 14.20553424 |
| FIBP      | 9158     | 1450  | 46.51547273 | 49.79157921 | 39.92553422 | 36.71640756 |
| ISG15     | 9636     | 685   | 98.46340942 | 32.53031894 | 52.1271893  | 1573.921349 |
| SYVN1     | 84447    | 3074  | 21.94126072 | 23.92153089 | 28.31793158 | 32.39915438 |
| FAM175B   | 23172    | 3008  | 22.35473713 | 19.55712393 | 24.79505344 | 23.68848396 |
| ZFAND5    | 7763     | 5887  | 11.42229477 | 13.47518868 | 14.8584833  | 25.85807796 |
| GFM1      | 85476    | 3468  | 19.38957592 | 18.05535883 | 22.72468742 | 10.4483179  |
| MAPKAPK5  | 8550     | 2066  | 32.54745851 | 24.05212425 | 31.80520851 | 15.18706377 |
| SENP2     | 59343    | 3207  | 20.96758631 | 17.09287198 | 24.5741241  | 13.31851889 |
| INSR      | 3643     | 9059  | 7.422789412 | 3.173133495 | 7.836591215 | 0.983206752 |
| SYNRG     | 11276    | 8181  | 8.219416854 | 11.03132103 | 8.057798013 | 18.13719063 |
| FAM105B   | 90268    | 7896  | 8.516090335 | 7.930089211 | 8.081053436 | 6.460495626 |
| MMS22L    | 253714   | 8643  | 7.756411329 | 6.780631272 | 7.749308036 | 2.904220642 |
| MAD2L2    | 10459    | 1196  | 56.05239391 | 36.7040459  | 45.75481036 | 18.11027453 |
| CCDC72    | 51372    | 491   | 136.5349554 | 129.3428007 | 155.774101  | 79.56979745 |
| NSL1      | 25936    | 13233 | 5.066021546 | 4.900197329 | 4.805918021 | 3.686643692 |
| RNF111    | 54778    | 5556  | 12.06599408 | 13.11488263 | 10.60987193 | 19.60164296 |
| IGBP1     | 3476     | 1679  | 39.92773265 | 50.69808551 | 39.13612911 | 44.12683969 |
| PPM1B     | 5495     | 3850  | 17.41263977 | 18.75267269 | 13.82954802 | 23.29246397 |
| TMEM59    | 9528     | 1709  | 39.22683623 | 44.20145122 | 40.92174138 | 70.35853985 |
| EGLN1     | 54583    | 7102  | 9.43940624  | 14.37022946 | 9.430761666 | 17.78592094 |
| LOC100506 | 1.01E+08 | 4382  | 15.29864517 | 10.11951261 | 12.92202557 | 7.668459893 |
| CTBP2     | 1488     | 4752  | 14.10746278 | 16.646802   | 19.65232839 | 11.28864661 |
| ITPK1     | 3705     | 3385  | 19.80462721 | 37.45695646 | 17.97636965 | 56.57243851 |
| GRAMD1A   | 57655    | 2672  | 25.08932003 | 22.60017124 | 23.64301783 | 21.97019845 |
| EXO1      | 9156     | 3478  | 19.27506128 | 11.53245637 | 22.17335765 | 3.899578441 |
| LRRK1     | 79705    | 7647  | 8.766661844 | 5.857116468 | 9.919083213 | 3.785448856 |
| SLC39A7   | 7922     | 2475  | 27.08632853 | 28.54059033 | 30.81769651 | 27.23588338 |
| C5orf24   | 134553   | 5083  | 13.14858882 | 11.26657485 | 12.51164926 | 8.880904277 |
| DDX47     | 51202    | 1836  | 36.40211163 | 28.5216127  | 37.63078266 | 15.98702894 |
| SLC23A2   | 9962     | 6971  | 9.587473383 | 6.936550364 | 8.759330947 | 14.05473672 |
| LOC219731 | 219731   | 3163  | 21.13002749 | 18.73964405 | 22.24401692 | 7.295886935 |
| ENOPH1    | 58478    | 2032  | 32.89088433 | 18.53283648 | 33.06523332 | 12.15370142 |
| ASF1B     | 55723    | 1746  | 38.27850914 | 43.0095159  | 43.32184683 | 19.245814   |
| DRAP1     | 10589    | 1022  | 65.39557432 | 62.35826598 | 63.67485959 | 110.9199249 |
| MRPS30    | 10884    | 1686  | 39.64073366 | 38.72477855 | 42.48252319 | 24.37310746 |
| PRIM1     | 5557     | 1471  | 45.29564295 | 52.11043069 | 52.28256501 | 21.60525594 |
| TAP2      | 6891     | 5679  | 11.73268019 | 15.26358767 | 8.854688009 | 56.21241713 |
| ATP6VOD1  | 9114     | 1688  | 39.47268411 | 63.23273459 | 41.68117626 | 101.4542761 |
| TRPM2     | 7226     | 5879  | 11.33354155 | 8.641920755 | 10.02695159 | 9.847704508 |
| ZBED4     | 9889     | 6897  | 9.660706218 | 6.300184649 | 11.058982   | 4.402541604 |
| C13orf27  | 93081    | 1177  | 56.6099327  | 81.78735753 | 68.93232656 | 22.35832811 |
| AAGAB     | 79719    | 2864  | 23.26462667 | 26.29799143 | 31.57467802 | 25.30360787 |
| CCDC43    | 124808   | 2147  | 31.03395006 | 24.70152723 | 31.49097514 | 14.89695405 |
| SNX17     | 9784     | 2043  | 32.51370759 | 46.24623511 | 35.67951183 | 24.57286246 |
| RIC8A     | 60626    | 2714  | 24.47513066 | 21.51148246 | 23.66638447 | 20.95892059 |
| SDAD1     | 55153    | 3031  | 21.91537599 | 18.67354072 | 24.25836257 | 14.96010073 |
| MEGF8     | 1954     | 10966 | 6.057405126 | 4.023424364 | 5.664574124 | 2.879710252 |
| NIPA1     | 123606   | 6565  | 10.11812713 | 5.77022946  | 10.68492624 | 7.986150115 |
| VPS41     | 27072    | 4894  | 13.57284524 | 23.03909654 | 15.41247646 | 28.62296141 |
| C12orf32  | 83695    | 1896  | 35.03454885 | 24.56330755 | 27.85927761 | 12.49165452 |
| FTSJ1     | 24140    | 2051  | 32.3868867  | 23.46750849 | 32.655909   | 12.53460049 |
| KIAA0196  | 9897     | 4173  | 15.91792586 | 13.83025769 | 15.94888565 | 10.18693056 |

|           |        |      |             |             |             |             |
|-----------|--------|------|-------------|-------------|-------------|-------------|
| CSNK1E    | 1454   | 2820 | 23.55514348 | 9.640279269 | 17.90675814 | 6.67584548  |
| SLC7A6    | 9057   | 6362 | 10.44097841 | 10.33254354 | 11.3911778  | 6.427323219 |
| FAM91A1   | 157769 | 5347 | 12.42294831 | 12.83569607 | 11.97293486 | 15.25693506 |
| QSOX2     | 169714 | 4549 | 14.60222128 | 11.07060601 | 14.49128282 | 4.894960414 |
| PI4KB     | 5298   | 4251 | 15.62585383 | 20.23369003 | 13.76755561 | 27.90480209 |
| TMEM85    | 51234  | 1013 | 65.5730549  | 50.59379812 | 71.33207146 | 43.36333984 |
| HMGXB4    | 10042  | 4264 | 15.53028106 | 12.33314109 | 12.48681047 | 10.01700049 |
| TTLL5     | 23093  | 4773 | 13.8741082  | 12.65192909 | 11.1109313  | 6.192041482 |
| RAB3GAP1  | 22930  | 4939 | 13.40779884 | 16.51280879 | 14.20257963 | 27.09161337 |
| GEN1      | 348654 | 6367 | 10.40067825 | 13.68424372 | 9.789383478 | 8.011948086 |
| RAB11FIP2 | 22841  | 6077 | 10.89700814 | 14.11725911 | 9.665486862 | 12.09176851 |
| ARL17A    | 51326  | 5273 | 12.55852806 | 11.8748311  | 11.17929991 | 8.484122646 |
| C21orf59  | 56683  | 1427 | 46.40582932 | 29.98169269 | 47.67602884 | 18.01574323 |
| DHX37     | 57647  | 4568 | 14.49674222 | 14.09777712 | 16.74366979 | 7.622102546 |
| IRAK4     | 51135  | 4351 | 15.21974683 | 26.88741887 | 17.09313629 | 23.96020787 |
| TBK1      | 29110  | 3098 | 21.37544172 | 29.70622944 | 24.41573421 | 54.69107756 |
| NME4      | 4833   | 1059 | 62.53174546 | 41.66276825 | 52.07301484 | 9.557547826 |
| CDK5RAP3  | 80279  | 1884 | 35.14921361 | 44.82674497 | 35.6627145  | 25.89456262 |
| ELOVL1    | 64834  | 1501 | 44.1180003  | 63.83614553 | 44.19947706 | 48.4156974  |
| C10orf2   | 56652  | 3684 | 17.97533074 | 13.60948807 | 17.83647144 | 5.329967347 |
| STK35     | 140901 | 6414 | 10.32446499 | 11.36050638 | 9.355296574 | 11.1092859  |
| DUSP7     | 1849   | 3248 | 20.38827538 | 25.10984071 | 17.17339193 | 13.89828708 |
| METTL3    | 56339  | 1975 | 33.52968023 | 29.78624242 | 34.23348032 | 14.34938775 |
| MBD6      | 114785 | 4214 | 15.71455113 | 34.15992272 | 20.5568942  | 39.39052388 |
| USP13     | 8975   | 7933 | 8.347550542 | 3.426898719 | 6.685046653 | 0.969657985 |
| VMP1      | 81671  | 2197 | 30.04858092 | 24.95076943 | 36.73681331 | 38.60614182 |
| DNAJB12   | 54788  | 4377 | 15.08264388 | 20.31305488 | 18.63283479 | 25.85280658 |
| NHLRC2    | 374354 | 6409 | 10.30062916 | 9.526627496 | 7.846118459 | 9.159677057 |
| PPM1A     | 5494   | 8210 | 8.041014894 | 6.893971002 | 8.904327336 | 6.533940156 |
| MAPK9     | 5601   | 4341 | 15.20772455 | 17.14492437 | 16.15907412 | 9.186474546 |
| ZNRF1     | 84937  | 4633 | 14.24924072 | 6.012105675 | 13.59008394 | 3.62650456  |
| FKBP15    | 23307  | 4336 | 15.22526113 | 17.16469481 | 16.22643578 | 47.71270709 |
| S100A4    | 6275   | 564  | 117.0509438 | 58.86891849 | 196.6746449 | 23.32956754 |
| WBSCR16   | 81554  | 2386 | 27.66837061 | 31.56640714 | 27.36252777 | 17.56193405 |
| TIMM17A   | 10440  | 1675 | 39.2909529  | 35.65322956 | 42.38309243 | 24.1706105  |
| CCDC25    | 55246  | 3653 | 18.01597211 | 11.34598395 | 16.36835135 | 8.145919205 |
| TGDS      | 23483  | 1952 | 33.71534124 | 24.42940294 | 29.87427978 | 16.69623306 |
| ZDHHC16   | 84287  | 1973 | 33.35648561 | 26.99291011 | 37.80208858 | 28.42006844 |
| URM1      | 81605  | 1745 | 37.71481152 | 29.37049713 | 38.38238931 | 21.34493455 |
| CIRBP     | 1153   | 3312 | 19.87087745 | 31.62178799 | 22.07262302 | 24.63128979 |
| ASNSD1    | 54529  | 2487 | 26.38036186 | 21.50375727 | 28.54510648 | 8.383664208 |
| COMT      | 1312   | 2304 | 28.47567706 | 31.52927744 | 31.17917485 | 18.27482791 |
| FHOD1     | 29109  | 3865 | 16.97489261 | 12.04968463 | 17.27451089 | 6.494483572 |
| PARVG     | 64098  | 2232 | 29.39424729 | 40.43335005 | 35.49811179 | 41.35643437 |
| DHX16     | 8449   | 3477 | 18.86912854 | 22.11023188 | 24.61039067 | 26.25695059 |
| GAB2      | 9846   | 6118 | 10.72375939 | 1.711856192 | 9.669783129 | 6.816009442 |
| HSD17B12  | 51144  | 2556 | 25.66821594 | 32.69258872 | 26.12127723 | 23.99684878 |
| NCOA3     | 8202   | 7996 | 8.205097542 | 44.6445674  | 9.538994354 | 67.11342117 |
| AGPAT2    | 10555  | 1576 | 41.62941621 | 45.66938907 | 45.44767392 | 36.09296351 |
| PAK1      | 5058   | 3484 | 18.83121698 | 49.95187336 | 27.59315913 | 78.14776713 |
| RPS6KB2   | 6199   | 1782 | 36.70234219 | 37.26382719 | 36.51835382 | 22.60569233 |
| PDE4D     | 5144   | 8395 | 7.790777102 | 4.140786042 | 7.021852105 | 4.099214616 |
| C3orf26   | 84319  | 1230 | 53.17363721 | 25.90656416 | 52.39174977 | 7.899662945 |
| ITSN2     | 50618  | 6112 | 10.70084649 | 14.21870861 | 10.92375402 | 19.64010401 |
| GABPA     | 2551   | 5182 | 12.62129945 | 15.30845924 | 13.33271265 | 8.945621308 |
| CCNC      | 892    | 2321 | 28.17904945 | 19.00942334 | 35.41136242 | 23.63559753 |
| C14orf2   | 9556   | 942  | 69.43054541 | 73.33135061 | 72.67119181 | 40.39981554 |
| CCDC144B  | 284047 | 8713 | 7.506435645 | 7.570122195 | 6.620078027 | 6.110270969 |
| FBXL3     | 26224  | 3572 | 18.25285207 | 18.83971747 | 20.40684285 | 20.85493325 |
| LRP3      | 4037   | 3714 | 17.55497782 | 6.839775461 | 14.44973866 | 0.49053844  |
| MELK      | 9833   | 2501 | 26.06924734 | 16.30483059 | 21.88034914 | 10.44115287 |
| COX6C     | 1345   | 921  | 70.79173464 | 74.03561513 | 69.9694378  | 66.37732531 |

|          |        |      |             |             |             |             |
|----------|--------|------|-------------|-------------|-------------|-------------|
| GTF2F2   | 2963   | 1469 | 44.38338162 | 38.22589282 | 44.29932369 | 33.07210831 |
| NCS1     | 23413  | 5009 | 13.01640799 | 2.580214756 | 8.394024259 | 0.282891204 |
| UBQLN2   | 29978  | 3418 | 19.07524506 | 19.7537459  | 20.52268601 | 19.78093629 |
| GMPR2    | 51292  | 1956 | 33.332918   | 33.83502422 | 30.78535633 | 38.49874081 |
| RPE      | 6120   | 2492 | 26.16339792 | 31.92265989 | 20.60280779 | 27.29377927 |
| RNF167   | 26001  | 1723 | 37.84050354 | 39.96244898 | 38.38196768 | 26.43441333 |
| SECISBP2 | 79048  | 3477 | 18.75156388 | 15.18876798 | 20.59980848 | 14.72950887 |
| PER2     | 8864   | 6342 | 10.28054046 | 10.40026406 | 9.061724234 | 5.936891913 |
| DCUN1D4  | 23142  | 4278 | 15.24057681 | 8.80288072  | 12.98922212 | 4.258671731 |
| CNOT3    | 4849   | 2908 | 22.35034437 | 18.23733802 | 21.50628933 | 14.89675952 |
| SLC35B2  | 347734 | 2059 | 31.56619788 | 29.97797653 | 37.86502037 | 22.12068682 |
| SLC25A1  | 6576   | 1620 | 40.1202478  | 48.55551711 | 31.17102344 | 24.99121765 |
| BRPF1    | 7862   | 4728 | 13.74678541 | 8.719130008 | 15.41735251 | 7.7066826   |
| TMEM135  | 65084  | 9098 | 7.143855951 | 14.32810734 | 6.618614749 | 13.55014042 |
| LRP10    | 26020  | 3252 | 19.9861013  | 44.0594761  | 24.55892983 | 155.4942496 |
| SHCBP1   | 79801  | 3249 | 19.94164828 | 19.82106676 | 21.46013273 | 13.39556957 |
| SURF6    | 6838   | 2352 | 27.54694527 | 20.085259   | 23.89530039 | 7.229602248 |
| SNRPE    | 6635   | 1593 | 40.67194932 | 26.71754098 | 42.44263882 | 12.32617684 |
| RBM23    | 55147  | 2624 | 24.69146923 | 21.9945371  | 27.21579624 | 26.07505933 |
| FAM35A   | 54537  | 3417 | 18.9611985  | 7.955981135 | 19.16835704 | 3.554501544 |
| CLK1     | 1195   | 3333 | 19.43906849 | 15.91184488 | 20.22197386 | 25.08344446 |
| TRUB1    | 142940 | 3412 | 18.98898455 | 12.01676846 | 15.79062548 | 7.950019823 |
| CENPC1   | 1060   | 3349 | 19.34619745 | 17.56578942 | 17.28636148 | 12.75380415 |
| AMFR     | 267    | 3594 | 18.02738321 | 13.08227504 | 15.7552354  | 10.41996095 |
| IL10RB   | 3588   | 1935 | 33.48341874 | 65.87095384 | 42.47533445 | 91.95605713 |
| CD81     | 975    | 1497 | 43.14364001 | 39.59485247 | 42.48277433 | 36.64543878 |
| ETV4     | 2118   | 2431 | 26.5676796  | 12.46616418 | 22.77112607 | 4.08021978  |
| MORC3    | 23515  | 4246 | 15.21102899 | 21.93689643 | 15.67468201 | 26.55508165 |
| AHR      | 196    | 6247 | 10.33872725 | 10.41574259 | 12.48024283 | 34.08918902 |
| SLC25A10 | 1468   | 1960 | 32.95205566 | 29.21836734 | 30.72252908 | 8.159122537 |
| FAM199X  | 139231 | 7626 | 8.469188185 | 9.934843012 | 8.505693907 | 10.24620261 |
| BORA     | 79866  | 2803 | 23.04175137 | 24.00837345 | 18.31687371 | 13.79376126 |
| OCRL     | 4952   | 5165 | 12.50455549 | 12.77027583 | 8.795009427 | 6.505942159 |
| IL1RAP   | 3556   | 4965 | 13.00826367 | 22.66475444 | 15.27718617 | 39.9149762  |
| METTLL17 | 64745  | 1802 | 35.72788176 | 30.54365879 | 36.58204525 | 17.07502063 |
| PKN1     | 5585   | 3097 | 20.78838971 | 75.04504042 | 21.28538765 | 81.37679509 |
| TMEM173  | 340061 | 2191 | 29.38459285 | 177.0660448 | 24.49398877 | 89.34217731 |
| NR2F2    | 7026   | 5110 | 12.59914735 | 5.145647123 | 12.19745687 | 2.178784239 |
| DCAF5    | 8816   | 5999 | 10.7320625  | 16.90096209 | 12.4326589  | 27.06250177 |
| VAC14    | 55697  | 3107 | 20.72148147 | 16.35206055 | 19.31280085 | 16.61389123 |
| EXOC1    | 55763  | 3582 | 17.97365799 | 15.36562622 | 15.21816539 | 19.15784046 |
| PRPS2    | 5634   | 2558 | 25.08884158 | 12.02146618 | 20.23642163 | 4.194186762 |
| MAF1     | 84232  | 1828 | 35.10790852 | 31.572027   | 33.17216986 | 21.15093699 |
| NADKD1   | 133686 | 3898 | 16.46415002 | 10.51852591 | 14.30969138 | 3.946791581 |
| NFYA     | 4800   | 6236 | 10.29141385 | 9.07625111  | 10.16443688 | 6.297498302 |
| SLC35A4  | 113829 | 2676 | 23.98253242 | 21.4005979  | 31.81904291 | 24.1310939  |
| STK25    | 10494  | 2198 | 29.19802401 | 22.40492417 | 30.18353734 | 16.02485084 |
| RAB5A    | 5868   | 2548 | 25.18730642 | 25.88637154 | 28.02757038 | 44.72819853 |
| TGIF2    | 60436  | 3456 | 18.56980809 | 13.0243641  | 13.63324704 | 9.723145616 |
| COL23A1  | 91522  | 3080 | 20.83677168 | 17.29123755 | 17.62992976 | 4.994997917 |
| SSBP3    | 23648  | 2106 | 30.47353123 | 24.33595322 | 35.61542748 | 33.93038396 |
| HSD17B10 | 3028   | 963  | 66.6430496  | 37.71726647 | 68.45362985 | 22.91250889 |
| HECA     | 51696  | 5621 | 11.41740914 | 11.13965209 | 9.998531671 | 15.62962578 |
| LRCH1    | 23143  | 5595 | 11.43393576 | 8.523001704 | 9.365258412 | 9.51542287  |
| GMNN     | 51053  | 1215 | 52.65256839 | 41.99891754 | 53.73414919 | 21.82566341 |
| ATP6V1F  | 9296   | 832  | 76.89046947 | 78.20570186 | 83.54890203 | 119.4622256 |
| MEST     | 4232   | 2507 | 25.51769868 | 19.46563939 | 27.72743777 | 6.378891174 |
| UXT      | 8409   | 734  | 87.15649945 | 80.75407921 | 93.84037085 | 41.91987353 |
| KDM4B    | 23030  | 5675 | 11.27275253 | 9.384495446 | 11.42985405 | 12.62728061 |
| TROAP    | 10024  | 2618 | 24.43577945 | 18.12962638 | 20.25686597 | 9.819887546 |
| OAZ2     | 4947   | 1936 | 33.04383812 | 30.73157377 | 31.10338687 | 34.2957991  |
| TRAF3    | 7187   | 7793 | 8.209017143 | 8.263652751 | 8.458981848 | 6.182223711 |

|          |        |       |             |             |             |             |
|----------|--------|-------|-------------|-------------|-------------|-------------|
| DDX58    | 23586  | 4759  | 13.39955546 | 14.56208551 | 9.545329627 | 356.8771087 |
| SAMD4B   | 55095  | 4543  | 14.03664636 | 11.13427679 | 13.48725089 | 12.65458884 |
| NSMCE4A  | 54780  | 1420  | 44.9073834  | 31.69873403 | 48.20863569 | 19.81521968 |
| TTC13    | 79573  | 3289  | 19.3884112  | 14.49869095 | 17.47323049 | 12.98646704 |
| C6orf89  | 221477 | 6751  | 9.445783503 | 13.59903216 | 9.952385441 | 12.0239926  |
| NME1     | 4830   | 1031  | 61.85110032 | 40.20065893 | 75.2099975  | 14.52932673 |
| JAG1     | 182    | 5988  | 10.6493795  | 4.465584865 | 10.19727723 | 1.487453235 |
| ATP6V1A  | 523    | 4607  | 13.84165063 | 18.91199907 | 17.56502357 | 17.79546115 |
| GUSB     | 2990   | 2321  | 27.47457321 | 73.15747771 | 26.67231154 | 91.75147084 |
| MKRN2    | 23609  | 2778  | 22.88124487 | 14.7592563  | 22.05636458 | 16.3225577  |
| EHBP1    | 23301  | 5177  | 12.27817235 | 8.221178827 | 8.284876677 | 5.904338093 |
| CDK19    | 23097  | 6139  | 10.35414534 | 14.33766256 | 9.361370759 | 13.98107801 |
| CD63     | 967    | 1031  | 61.65285961 | 97.25965871 | 87.91577364 | 162.7677278 |
| DDX11    | 1663   | 3947  | 16.10440797 | 14.33987888 | 15.63089696 | 5.487683896 |
| RP2      | 6102   | 3831  | 16.59203818 | 23.14993697 | 17.42782161 | 49.24659365 |
| RRN3     | 54700  | 3762  | 16.89635786 | 14.09733625 | 16.23107284 | 7.425620172 |
| GTF2A2   | 2958   | 1582  | 40.05038691 | 38.4534279  | 41.93641913 | 27.12700313 |
| RDBP     | 7936   | 1568  | 40.40797965 | 44.05493129 | 45.27530601 | 27.75650863 |
| AVL9     | 23080  | 2353  | 26.92720446 | 26.70582962 | 21.01174422 | 28.4759684  |
| FAN1     | 22909  | 4901  | 12.92791514 | 11.77589581 | 12.97627284 | 6.939002036 |
| PLCXD1   | 55344  | 5320  | 11.90972032 | 11.51860682 | 13.30458554 | 5.13682265  |
| RABGGTB  | 5876   | 1526  | 41.52012588 | 38.55034651 | 49.01363402 | 26.79595696 |
| ZFAND6   | 54469  | 1709  | 37.074144   | 41.59369598 | 36.96556094 | 70.24009112 |
| KIF18B   | 146909 | 2669  | 23.7391203  | 18.61809243 | 19.94895461 | 5.612490018 |
| PDXDC1   | 23042  | 4032  | 15.71421431 | 24.09599468 | 19.07431873 | 23.29538502 |
| CNPY2    | 10330  | 1247  | 50.80971299 | 45.03114399 | 57.43827915 | 26.46022828 |
| ELP3     | 55140  | 3232  | 19.60387132 | 20.68372693 | 20.5924195  | 15.28237703 |
| MED23    | 9439   | 5227  | 12.12162083 | 11.2972377  | 12.89455498 | 10.68880164 |
| COPS7B   | 64708  | 1977  | 32.04841279 | 26.37473355 | 37.51186203 | 20.37599582 |
| RECQL4   | 9401   | 3840  | 16.44669946 | 10.67739948 | 13.26031966 | 4.744426476 |
| FNIP1    | 96459  | 6655  | 9.489906225 | 7.232435748 | 8.222802884 | 14.90460449 |
| SCARB2   | 950    | 4780  | 13.21241128 | 10.48898621 | 18.21115516 | 79.82811855 |
| GNE      | 10020  | 5329  | 11.85125275 | 9.073877386 | 12.33056123 | 5.811900175 |
| MRPL47   | 57129  | 1222  | 51.68193611 | 42.48773776 | 49.27672421 | 35.28424534 |
| C12orf29 | 91298  | 2895  | 21.8153112  | 12.23847906 | 19.92426247 | 3.216486251 |
| STX6     | 10228  | 4548  | 13.88639532 | 6.957396929 | 9.941719202 | 9.435998009 |
| CYLD     | 1540   | 8730  | 7.234287048 | 10.41417358 | 7.599474807 | 20.98489358 |
| ZCCHC17  | 51538  | 1602  | 39.4228002  | 22.25544916 | 42.20419703 | 21.60757526 |
| NDUFAB1  | 4706   | 804   | 78.5514004  | 54.32239578 | 72.53058972 | 26.18482804 |
| CCDC18   | 343099 | 4331  | 14.58215791 | 11.88509586 | 12.78148406 | 7.431583747 |
| LPL      | 4023   | 3747  | 16.85490417 | 4.043934498 | 7.21762729  | 3.187430722 |
| KIAA0586 | 9786   | 5600  | 11.27773677 | 8.236851025 | 8.187284503 | 3.036432944 |
| IFT74    | 80173  | 2183  | 28.83689407 | 20.00696574 | 19.16371175 | 15.30039505 |
| GOLGA2   | 2801   | 4304  | 14.62614771 | 16.15329871 | 15.61072354 | 19.65968046 |
| C18orf10 | 25941  | 2079  | 30.2794323  | 26.15256136 | 27.23632325 | 13.33946812 |
| ABCB7    | 22     | 2404  | 26.18591504 | 28.82735647 | 26.89398377 | 19.7881792  |
| PDCD10   | 11235  | 1454  | 43.29500671 | 52.41318995 | 44.02976801 | 57.08104114 |
| CLPTM1   | 1209   | 2531  | 24.87196355 | 26.41240831 | 30.21931395 | 29.8324638  |
| VDR      | 7421   | 5060  | 12.44089719 | 13.4316144  | 15.07387329 | 26.80382177 |
| RNF34    | 80196  | 2105  | 29.90543456 | 24.66509052 | 36.73644782 | 27.21490177 |
| AP1G2    | 8906   | 2876  | 21.8883657  | 40.05719681 | 25.19842599 | 40.11976769 |
| PFKFB3   | 5209   | 4553  | 13.82625516 | 25.44981245 | 14.84979654 | 20.80753522 |
| LUZP1    | 7798   | 8487  | 7.417337075 | 7.535404798 | 7.518321896 | 8.610441796 |
| KIAA1549 | 57670  | 12427 | 5.065658627 | 3.783511425 | 4.641565933 | 1.205418513 |
| RAP2C    | 57826  | 3933  | 16.00583264 | 21.81301389 | 18.37258794 | 36.85203811 |
| DEAF1    | 10522  | 2737  | 22.92530274 | 17.42279669 | 23.39031154 | 5.547009398 |
| FBXO5    | 26271  | 2269  | 27.65383587 | 22.88233387 | 33.15001104 | 12.13324168 |
| DHX40    | 79665  | 3682  | 17.04143226 | 11.98285486 | 16.52634744 | 8.24669458  |
| PPTC7    | 160760 | 3748  | 16.74134301 | 15.75524585 | 19.39219795 | 21.17185546 |
| C16orf57 | 79650  | 3113  | 20.15629733 | 21.90388742 | 23.3478824  | 23.92991377 |
| RAD17    | 5884   | 3164  | 19.83140126 | 15.07149006 | 24.17354096 | 11.26026545 |
| PFKFB4   | 5210   | 3503  | 17.9122334  | 26.27173817 | 21.4119584  | 36.0014792  |



|          |        |       |             |             |             |             |
|----------|--------|-------|-------------|-------------|-------------|-------------|
| PPID     | 5481   | 1851  | 33.89873236 | 22.75277008 | 36.5268091  | 13.56087467 |
| SLC7A11  | 23657  | 9648  | 6.503581425 | 6.998165783 | 4.730255851 | 6.777002771 |
| ALG10B   | 144245 | 10091 | 6.218070914 | 5.299756648 | 5.192609337 | 2.126395746 |
| PDE12    | 201626 | 3993  | 15.66295202 | 14.34209867 | 15.34499895 | 11.1531054  |
| PIH1D1   | 55011  | 1256  | 49.79471928 | 38.67637363 | 50.29788507 | 29.9775227  |
| E2F8     | 79733  | 3736  | 16.74040884 | 12.52539181 | 19.28482431 | 5.039048248 |
| CNDP2    | 55748  | 5089  | 12.28967723 | 12.65447944 | 12.91207718 | 17.42264531 |
| VKORC1L1 | 154807 | 1148  | 54.47923991 | 30.86271505 | 53.9254661  | 17.10418093 |
| SLC25A30 | 253512 | 3671  | 17.03682033 | 12.01876099 | 14.84921505 | 12.73796441 |
| FAM102B  | 284611 | 5359  | 11.67049215 | 3.783872796 | 9.817112442 | 2.077549443 |
| DST      | 667    | 16652 | 3.75583518  | 2.622820455 | 1.877861199 | 0.887419349 |
| SEC31B   | 25956  | 4631  | 13.50511065 | 17.08175407 | 13.23096109 | 11.80215785 |
| SRPK2    | 6733   | 3737  | 16.7359292  | 12.87981266 | 15.32196155 | 18.09238433 |
| NARF     | 26502  | 1796  | 34.82303309 | 31.51419929 | 47.40966527 | 47.22588729 |
| ERCC3    | 2071   | 2751  | 22.7343393  | 17.09112922 | 22.42644504 | 18.32235074 |
| FAM117A  | 81558  | 2385  | 26.13743449 | 32.32708969 | 26.04516555 | 27.75439756 |
| SAMD1    | 90378  | 1617  | 38.55150356 | 22.60022282 | 41.55136309 | 12.14322802 |
| BRAT1    | 221927 | 3013  | 20.68960546 | 26.6985062  | 18.65308547 | 12.83236403 |
| MYO5A    | 4644   | 12238 | 5.093788303 | 5.80843491  | 3.159430571 | 3.639021887 |
| DDX60L   | 91351  | 6754  | 9.229757366 | 31.67299043 | 8.477668097 | 232.610365  |
| RBM38    | 55544  | 2401  | 25.9632575  | 25.70789407 | 38.63140785 | 27.23220439 |
| ACER3    | 55331  | 4387  | 14.20966065 | 26.92074833 | 14.59295252 | 43.14360311 |
| PDK3     | 5165   | 12795 | 4.872042302 | 4.319070404 | 4.574121055 | 4.113443092 |
| CDK8     | 1024   | 1772  | 35.17933479 | 20.24608479 | 34.1012651  | 14.73663844 |
| ARFGAP1  | 55738  | 3274  | 19.04025084 | 18.98910172 | 17.81142154 | 14.6535249  |
| SLAIN1   | 122060 | 2374  | 26.25854307 | 13.61025244 | 18.51189148 | 3.410764329 |
| RINT1    | 60561  | 2990  | 20.78039969 | 15.94856005 | 23.24839013 | 11.17082354 |
| EXOSC9   | 5393   | 1644  | 37.79403594 | 25.88871216 | 30.715972   | 32.13742897 |
| PI4KA    | 5297   | 6738  | 9.221340915 | 9.722886511 | 9.281728905 | 8.68238964  |
| MMGT1    | 93380  | 3704  | 16.7746747  | 12.9344026  | 16.25706182 | 8.853530183 |
| MRS2     | 57380  | 3348  | 18.55836173 | 14.64253006 | 22.97122256 | 10.76234696 |
| C11orf30 | 56946  | 5518  | 11.26012959 | 13.48787907 | 12.0613809  | 10.74875985 |
| BCYRN1   | 618    | 200   | 310.6669754 | 65.735642   | 174.3099281 | 7.085010203 |
| ZDHHC7   | 55625  | 3279  | 18.8865535  | 23.37738443 | 17.20434013 | 34.32462574 |
| PECAM1   | 5175   | 6831  | 9.065877458 | 8.383545598 | 13.6093244  | 23.32184382 |
| DDX49    | 54555  | 1836  | 33.73039701 | 29.73529835 | 36.71015189 | 18.74341324 |
| RAP1GDS1 | 5910   | 3770  | 16.42679282 | 10.5210127  | 13.39444508 | 3.436458151 |
| INPP4A   | 3631   | 6752  | 9.171950373 | 10.65979816 | 8.574055778 | 18.28815261 |
| EML4     | 27436  | 5565  | 11.12830349 | 11.13162378 | 12.79478249 | 49.10673225 |
| INO80D   | 54891  | 14136 | 4.380942906 | 3.625602539 | 3.333085865 | 3.723224701 |
| ABL2     | 27     | 12244 | 5.057906641 | 3.767262801 | 4.59014591  | 7.539003717 |
| DCXR     | 51181  | 860   | 72.01047549 | 47.67583022 | 62.15702863 | 25.42129907 |
| KCNE3    | 10008  | 3070  | 20.17231561 | 27.87223158 | 26.22133358 | 47.40923533 |
| HDAC6    | 10013  | 4099  | 15.10832128 | 17.01552338 | 14.32963251 | 15.11179118 |
| SPTY2D1  | 144108 | 5752  | 10.76651754 | 9.491308721 | 12.63594539 | 10.27629137 |
| IKBKB    | 3551   | 4187  | 14.74196865 | 16.01925916 | 15.2395505  | 18.90367457 |
| MON2     | 23041  | 10379 | 5.947068383 | 6.376462797 | 5.49637591  | 7.216367597 |
| NDUFS8   | 4728   | 824   | 74.90852275 | 65.17315173 | 73.07786042 | 34.39325341 |
| PAK1IP1  | 55003  | 1511  | 40.85018051 | 20.20389001 | 45.44510089 | 10.58364009 |
| POLH     | 5429   | 8412  | 7.337686965 | 6.039687604 | 6.605788426 | 3.778094565 |
| YEATS4   | 8089   | 1404  | 43.96340652 | 31.42512221 | 40.93266032 | 16.72489181 |
| COG2     | 22796  | 2977  | 20.73383364 | 15.26969019 | 22.21435348 | 8.703693133 |
| C4orf3   | 401152 | 2975  | 20.74777235 | 25.46659254 | 23.15254864 | 39.26099292 |
| RPF2     | 84154  | 1078  | 57.25846266 | 28.31918164 | 60.95506566 | 12.20582198 |
| FAM3C    | 10447  | 2552  | 24.1867644  | 17.81264408 | 28.81155837 | 14.1985762  |
| HAUS2    | 55142  | 3953  | 15.5629235  | 13.35981439 | 16.8899531  | 7.220457798 |
| C20orf27 | 54976  | 1376  | 44.70947426 | 22.83387249 | 38.8481429  | 6.473015967 |
| CDC73    | 79577  | 5942  | 10.35345617 | 10.01284531 | 10.20510375 | 16.79525908 |
| HCG18    | 414777 | 6814  | 9.028505515 | 9.843357515 | 8.62007098  | 4.961200486 |
| STRBP    | 55342  | 6426  | 9.573644037 | 6.27648863  | 11.37636592 | 3.055648881 |
| BAG5     | 9529   | 5073  | 12.12699322 | 11.94766218 | 13.20269453 | 8.858507309 |
| C7orf73  | 647087 | 2515  | 24.46132667 | 25.60582342 | 20.66642199 | 17.62700636 |

|          |        |      |             |             |             |             |
|----------|--------|------|-------------|-------------|-------------|-------------|
| SCAMP3   | 10067  | 1595 | 38.57068124 | 30.31642169 | 33.38166763 | 25.00218558 |
| ATMIN    | 23300  | 4866 | 12.6428764  | 10.12043225 | 13.80775876 | 7.737724725 |
| DGUOK    | 1716   | 1144 | 53.77643058 | 45.18984516 | 49.12740081 | 40.16726564 |
| PARG     | 8505   | 4276 | 14.38733316 | 9.692909112 | 14.52706264 | 8.852712201 |
| GSK3A    | 2931   | 2200 | 27.9637439  | 24.91674566 | 27.27494192 | 26.03971283 |
| NPAT     | 4863   | 5962 | 10.31872469 | 8.33473477  | 9.107712793 | 8.148763353 |
| DDX52    | 11056  | 3822 | 16.09634657 | 12.06864619 | 17.41357923 | 11.91692678 |
| BID      | 637    | 2506 | 24.54917661 | 31.12188334 | 22.8484319  | 33.19962597 |
| FAR2     | 55711  | 2235 | 27.43438497 | 68.79398321 | 30.91280401 | 59.77765081 |
| XPR1     | 9213   | 8500 | 7.21362946  | 4.168281985 | 7.158824856 | 4.858292711 |
| RBM41    | 55285  | 5141 | 11.92683338 | 11.13946703 | 11.178653   | 11.81261601 |
| PITRM1   | 10531  | 3508 | 17.47886272 | 14.67341795 | 14.99712246 | 6.866885602 |
| ZNF121   | 7675   | 1729 | 35.46318705 | 31.83324068 | 35.31596069 | 17.2105511  |
| AGTPBP1  | 23287  | 4436 | 13.82232877 | 11.55354317 | 12.90761279 | 9.081006251 |
| TBRG1    | 84897  | 5162 | 11.87831275 | 14.89292449 | 10.88759134 | 11.76456003 |
| TANK     | 10010  | 2089 | 29.35177138 | 45.65456633 | 30.74704043 | 150.1016317 |
| NDUFS6   | 4726   | 554  | 110.6784303 | 108.1985419 | 118.6093155 | 56.27083916 |
| DCAF15   | 90379  | 2274 | 26.96387441 | 28.90749428 | 25.82988727 | 27.77388093 |
| ATP6V0E1 | 8992   | 894  | 68.58596243 | 94.46710013 | 90.75318609 | 148.538405  |
| HDGFRP2  | 84717  | 2344 | 26.15863925 | 21.57978645 | 25.50920967 | 13.47222808 |
| DRG1     | 4733   | 1467 | 41.79676238 | 25.36677461 | 40.32701648 | 14.3507851  |
| ATF2     | 1386   | 2117 | 28.96355712 | 20.42018934 | 25.05076764 | 24.47887998 |
| NDC80    | 10403  | 2209 | 27.75728855 | 19.46885838 | 27.92899516 | 8.79727064  |
| USP20    | 10868  | 4511 | 13.54720999 | 9.928922552 | 14.80070596 | 20.41789684 |
| COX6B1   | 1340   | 590  | 103.578753  | 119.3476752 | 119.2505518 | 102.5868305 |
| NADSYN1  | 55191  | 2453 | 24.91294914 | 49.68996272 | 29.02689139 | 29.29565689 |
| GYG1     | 2992   | 2051 | 29.79593576 | 63.23189786 | 25.44482499 | 96.72368878 |
| TMX4     | 56255  | 2368 | 25.80720618 | 12.04500999 | 28.37354481 | 7.095268423 |
| ALDH16A1 | 126133 | 3119 | 19.59328767 | 24.00505998 | 18.08689685 | 14.86252312 |
| TMEM129  | 92305  | 2858 | 21.38259771 | 18.32249157 | 18.48187206 | 11.19095883 |
| KIAA0317 | 9870   | 5445 | 11.22340941 | 13.42316264 | 14.59009555 | 17.58472951 |
| PREB     | 10113  | 2211 | 27.6397396  | 20.55986779 | 29.62382452 | 16.29685102 |
| TMEM209  | 84928  | 3560 | 17.16614164 | 18.96581558 | 19.11058797 | 10.91751171 |
| MAD1L1   | 8379   | 2754 | 22.19007416 | 13.02689261 | 21.4813846  | 7.350358132 |
| GFM2     | 84340  | 3111 | 19.64367221 | 18.26497416 | 18.67673075 | 12.16785515 |
| GTSE1    | 51512  | 3128 | 19.47157228 | 14.60380447 | 16.81902352 | 6.212650525 |
| ZNF326   | 284695 | 2729 | 22.31846027 | 18.78032887 | 23.92341197 | 16.5414571  |
| C21orf33 | 8209   | 1668 | 36.51503482 | 55.70817119 | 36.73416115 | 23.05844362 |
| DCTD     | 1635   | 2042 | 29.8271685  | 22.69794242 | 28.24717916 | 16.75341716 |
| LLPH     | 84298  | 1234 | 49.35743766 | 45.14438508 | 51.02338646 | 31.49622503 |
| C3orf23  | 285343 | 3702 | 16.45247922 | 15.16851339 | 14.32535794 | 13.23278899 |
| KDM4C    | 23081  | 4687 | 12.99489611 | 18.39902902 | 13.56874614 | 24.35883907 |
| TSG101   | 7251   | 1562 | 38.99300773 | 36.94856936 | 40.7149252  | 45.2289841  |
| NDE1     | 54820  | 3936 | 15.47435927 | 13.19106086 | 10.7360143  | 17.94910396 |
| GOLGA7   | 51125  | 2042 | 29.72707733 | 23.02531659 | 35.9039237  | 27.06321233 |
| NDUFA3   | 4696   | 414  | 146.6248597 | 148.01688   | 132.1805633 | 101.2144315 |
| DOCK5    | 80005  | 7555 | 8.034770603 | 21.82610016 | 5.537310754 | 26.47249723 |
| ZFX      | 7543   | 7740 | 7.842725053 | 6.017058283 | 6.333083286 | 8.133769558 |
| TMEM164  | 84187  | 5584 | 10.87082591 | 14.0467595  | 15.55122438 | 17.0019944  |
| WIPF2    | 147179 | 5525 | 10.98691256 | 15.12439037 | 11.12830146 | 18.94221215 |
| ORAI1    | 84876  | 1496 | 40.57666571 | 21.59808776 | 38.69787742 | 18.13199708 |
| RBCK1    | 10616  | 2778 | 21.85122099 | 28.7163791  | 17.4929788  | 71.7026642  |
| HOXA10   | 3206   | 2648 | 22.92397731 | 15.56799346 | 16.99533768 | 9.632189098 |
| MRPL23   | 6150   | 758  | 79.81306826 | 86.42850833 | 75.53848328 | 36.0526339  |
| ABHD10   | 55347  | 2666 | 22.69253779 | 18.13754411 | 20.60541559 | 8.200419054 |
| C4orf43  | 55319  | 1923 | 31.4603774  | 19.6991973  | 35.48880807 | 9.895118626 |
| RBM12B   | 389677 | 5115 | 11.82762576 | 8.059442166 | 8.591833893 | 5.857179221 |
| MID1IP1  | 58526  | 2454 | 24.65293632 | 27.33196337 | 30.8231233  | 10.47614735 |
| ZNF558   | 148156 | 3014 | 20.07243057 | 13.15999266 | 18.71699777 | 9.201311953 |
| APAF1    | 317    | 7204 | 8.397876977 | 9.217676298 | 10.7930028  | 12.44808249 |
| CCDC124  | 115098 | 1066 | 56.75263203 | 41.80725793 | 55.69513878 | 15.76134674 |
| FOXN2    | 3344   | 5472 | 11.05597693 | 9.325417545 | 10.73413079 | 18.53378296 |

|          |        |      |             |             |             |             |
|----------|--------|------|-------------|-------------|-------------|-------------|
| SNAP23   | 8773   | 2650 | 22.82954934 | 36.57819542 | 32.60961034 | 49.65236261 |
| MAT2B    | 27430  | 2119 | 28.55040384 | 28.18270859 | 33.60215412 | 34.48646509 |
| BACH1    | 571    | 5770 | 10.484975   | 15.4862923  | 10.36284012 | 60.06208204 |
| ISG20L2  | 81875  | 2051 | 29.39732792 | 37.48282605 | 35.74637357 | 23.4900387  |
| RBMS1    | 5937   | 4305 | 14.00555623 | 22.87852419 | 17.86472779 | 22.52344375 |
| NBAS     | 51594  | 7299 | 8.260572623 | 6.930130078 | 6.57098792  | 3.605391449 |
| CCDC99   | 54908  | 2683 | 22.47257532 | 13.37162216 | 21.02610186 | 7.846664833 |
| CLDND1   | 56650  | 2500 | 24.11756783 | 20.32234085 | 26.79090774 | 20.89065866 |
| AKAP1    | 8165   | 3968 | 15.19504021 | 16.6787569  | 17.94429551 | 6.172855952 |
| AFTPH    | 54812  | 4135 | 14.58135903 | 18.64573372 | 16.96409692 | 32.45715505 |
| SOS2     | 6655   | 5313 | 11.3483756  | 11.99513417 | 11.69164687 | 21.29827487 |
| EXT2     | 2132   | 3678 | 16.39312658 | 13.87403067 | 17.92301401 | 10.45717345 |
| ZNF800   | 168850 | 4242 | 14.16537798 | 19.69878755 | 15.63965466 | 18.08593566 |
| FKTN     | 2218   | 7456 | 8.059218536 | 6.156589734 | 6.149248017 | 3.203675674 |
| POLR2C   | 5432   | 1822 | 32.9799854  | 29.96378033 | 35.60067055 | 19.66515299 |
| DTD1     | 92675  | 1368 | 43.92509752 | 30.94898399 | 39.07532502 | 9.322381847 |
| GRB10    | 2887   | 5040 | 11.92252647 | 7.516181827 | 20.49965244 | 4.05661015  |
| ZNF37BP  | 1E+08  | 8688 | 6.916382758 | 4.411512635 | 5.179978611 | 2.609580185 |
| ARF5     | 381    | 1096 | 54.82621661 | 46.35570449 | 60.33953495 | 46.35916478 |
| BCL7B    | 9275   | 1729 | 34.63571269 | 49.23197546 | 40.20398293 | 54.09030346 |
| FAM118A  | 55007  | 3255 | 18.3978947  | 15.12934664 | 17.46101407 | 9.639469665 |
| VASP     | 7408   | 2298 | 26.05968113 | 59.63537908 | 35.67384134 | 88.00105922 |
| NKIRAS2  | 28511  | 2493 | 24.02131859 | 28.51328778 | 22.20481648 | 33.77874328 |
| TNKS1BP1 | 85456  | 5822 | 10.28600949 | 1.263050257 | 10.08882921 | 1.043089297 |
| NR1H2    | 7376   | 2087 | 28.69436858 | 27.44034498 | 26.11953447 | 36.66416397 |
| CYFIP2   | 26999  | 6791 | 8.818310593 | 29.33476957 | 10.01821428 | 26.2313944  |
| PRPF39   | 55015  | 2894 | 20.69286359 | 15.93861981 | 21.31829659 | 10.00253193 |
| SUPT7L   | 9913   | 4261 | 14.00628047 | 16.21171844 | 12.84270199 | 17.81526018 |
| ABCD3    | 5825   | 3616 | 16.50463525 | 10.59934231 | 15.95153204 | 5.598143334 |
| UNC45A   | 55898  | 4035 | 14.79077102 | 7.676268446 | 14.92345898 | 8.929947362 |
| STAU2    | 27067  | 4225 | 14.12562392 | 17.08823429 | 17.75292078 | 12.7925459  |
| ZNF12    | 7559   | 5074 | 11.76207353 | 13.35063779 | 11.20134032 | 12.64681702 |
| KIF1C    | 10749  | 7935 | 7.521204924 | 6.178095859 | 6.683361702 | 4.719513503 |
| TAF4     | 6874   | 4647 | 12.84285799 | 9.734244675 | 10.77565923 | 4.007629738 |
| RGS18    | 64407  | 2158 | 27.56087808 | 19.61918911 | 27.21833348 | 16.69709806 |
| VPS33A   | 65082  | 2628 | 22.63180171 | 20.68918382 | 21.8681336  | 20.72045819 |
| CLCN6    | 1185   | 5644 | 10.5379828  | 9.199152294 | 6.663481134 | 6.133121114 |
| TBC1D15  | 64786  | 5852 | 10.16342702 | 6.66365684  | 8.917863304 | 7.61010763  |
| PMS1     | 5378   | 3538 | 16.81073344 | 9.888279114 | 16.12404906 | 3.776230909 |
| KIAA0141 | 9812   | 4988 | 11.92389232 | 15.90385641 | 9.911915429 | 9.658794985 |
| PPIE     | 10450  | 4392 | 13.54197971 | 9.792055591 | 14.48012595 | 6.683102261 |
| ATP5I    | 521    | 373  | 159.4540882 | 160.1049853 | 156.3393945 | 87.91816568 |
| CBX2     | 84733  | 4265 | 13.94522272 | 4.440979649 | 12.43434352 | 0.901793293 |
| KIAA1274 | 27143  | 4601 | 12.92683654 | 4.746273224 | 7.071908987 | 1.715871692 |
| ACBD6    | 84320  | 1617 | 36.78192635 | 23.42706024 | 32.01284263 | 9.639469665 |
| FBXO18   | 84893  | 3727 | 15.90340454 | 9.924933101 | 15.70321409 | 10.42831813 |
| MRPL9    | 65005  | 1314 | 45.1080584  | 36.63003037 | 49.04250549 | 17.87043235 |
| NPM3     | 10360  | 904  | 65.56635922 | 33.52350124 | 61.70262942 | 10.076658   |
| SASS6    | 163786 | 3908 | 15.16683437 | 11.4039245  | 16.59785613 | 7.666190306 |
| IL8      | 3576   | 1718 | 34.50057551 | 173.0260777 | 63.82816714 | 441.3844707 |
| TCEB1    | 6921   | 2235 | 26.51990547 | 20.23938926 | 29.1166472  | 18.38615623 |
| SASH3    | 54440  | 2707 | 21.89582147 | 61.16168628 | 23.64953184 | 177.3776368 |
| AURKAIP1 | 54998  | 1032 | 57.43409761 | 63.69732752 | 58.75845592 | 34.52275182 |
| THOC7    | 80145  | 1028 | 57.45875736 | 41.61855591 | 52.82119034 | 35.83857301 |
| INTS2    | 57508  | 6162 | 9.585784253 | 6.834692862 | 8.02347195  | 4.664865066 |
| SLC35E2B | 728661 | 6020 | 9.811894114 | 10.36431092 | 8.493507018 | 9.583426236 |
| WWP2     | 11060  | 4527 | 13.04784682 | 23.82394951 | 14.18832946 | 23.83357278 |
| TIA1     | 7072   | 4653 | 12.69452022 | 16.37841783 | 15.57504258 | 23.18817622 |
| ZIC2     | 7546   | 2991 | 19.74844619 | 15.34721934 | 20.3443702  | 16.91983141 |
| REV1     | 51455  | 4751 | 12.43266735 | 12.61671063 | 13.11913378 | 9.62932499  |
| C2orf68  | 388969 | 4283 | 13.79117501 | 13.2149199  | 12.72740332 | 7.703923573 |
| CENPN    | 55839  | 4659 | 12.63430273 | 8.848260716 | 12.28979831 | 6.821492055 |

|          |        |       |             |             |             |             |
|----------|--------|-------|-------------|-------------|-------------|-------------|
| TAB3     | 257397 | 6798  | 8.658902088 | 9.505954483 | 8.764681186 | 10.21375404 |
| LSG1     | 55341  | 3589  | 16.40100763 | 15.21148168 | 17.36667724 | 7.839958749 |
| RC3H2    | 54542  | 3991  | 14.74898933 | 16.52680398 | 14.9291663  | 25.86788276 |
| ZNF692   | 55657  | 2208  | 26.6590654  | 21.59700839 | 21.91313875 | 6.967660138 |
| ATRN     | 8455   | 8658  | 6.798708293 | 5.945293391 | 8.248354047 | 5.330767008 |
| NDUFB5   | 4711   | 1076  | 54.70559145 | 66.06284984 | 63.22833937 | 63.40011786 |
| DUS3L    | 56931  | 2127  | 27.67429074 | 19.48607398 | 26.52234663 | 6.471632666 |
| PPAPDC2  | 403313 | 3023  | 19.47178842 | 25.57821423 | 17.82256505 | 20.28976033 |
| NGRN     | 51335  | 1777  | 33.12505143 | 23.44947217 | 29.24932543 | 15.94825032 |
| HERC5    | 51191  | 3525  | 16.69878479 | 3.097532355 | 9.470352424 | 187.9573528 |
| COL4A2   | 1284   | 6264  | 9.397065197 | 3.272766123 | 6.374971248 | 4.782801998 |
| NAA35    | 60560  | 2657  | 22.07709079 | 18.2828473  | 21.2318522  | 12.26610724 |
| RIOK2    | 55781  | 3980  | 14.73839955 | 10.69372934 | 14.7049947  | 7.73095155  |
| MAGOH    | 4116   | 772   | 75.98294071 | 64.65611578 | 73.34755964 | 41.69195494 |
| DCUN1D1  | 54165  | 3192  | 18.37682651 | 19.96558516 | 17.60706345 | 28.7281563  |
| MRPL32   | 64983  | 908   | 64.60223593 | 54.97193985 | 75.15966731 | 47.04018732 |
| FAM123B  | 139285 | 8443  | 6.947628832 | 3.66857079  | 5.630589992 | 1.534460172 |
| FBXL12   | 54850  | 1876  | 31.26803317 | 33.61495191 | 31.87291443 | 34.42153906 |
| PARN     | 5073   | 3087  | 19.00188864 | 18.33479168 | 20.19080162 | 13.31164858 |
| TYW3     | 127253 | 3539  | 16.57497322 | 10.6410635  | 15.34336922 | 4.919152929 |
| TCHP     | 84260  | 3172  | 18.49269553 | 13.41773102 | 17.98451626 | 8.74298683  |
| PRMT3    | 10196  | 2743  | 21.38491806 | 13.32284371 | 15.48240504 | 4.427900757 |
| ARHGAP25 | 9938   | 3020  | 19.42345372 | 15.19984538 | 21.68817087 | 59.45509981 |
| CCDC85B  | 11007  | 1277  | 45.93487097 | 28.61751002 | 33.09080053 | 16.16894598 |
| KIAA1279 | 26128  | 2548  | 23.02151893 | 12.24355411 | 17.49650104 | 9.533541426 |
| C6orf115 | 58527  | 941   | 62.11949422 | 88.32793986 | 61.07274717 | 131.4389323 |
| PDCD5    | 9141   | 604   | 96.77888089 | 49.06746204 | 97.2469597  | 23.79544581 |
| MCTS1    | 28985  | 9805  | 5.961697507 | 5.908872823 | 6.852478747 | 4.831040687 |
| MAPK8IP3 | 23162  | 5653  | 10.34042881 | 9.972876214 | 10.764198   | 10.7785402  |
| ARPC4    | 10093  | 1988  | 29.40364389 | 52.23341604 | 30.60865758 | 48.67253345 |
| MANBA    | 4126   | 3311  | 17.65461917 | 25.17046937 | 20.42015211 | 43.83615063 |
| PIGY     | 84992  | 1353  | 43.20358024 | 32.60966118 | 44.97413989 | 28.12758776 |
| STRN3    | 29966  | 4233  | 13.80922373 | 9.528163463 | 10.03265699 | 9.325213389 |
| GPN1     | 11321  | 1849  | 31.61408548 | 27.11592973 | 39.08025332 | 13.90398356 |
| OXR1     | 55074  | 4716  | 12.39492028 | 15.78161932 | 11.78284399 | 10.30172331 |
| IKBKE    | 9641   | 3492  | 16.73953152 | 20.61138522 | 16.51796674 | 30.43389263 |
| SLC37A4  | 2542   | 2621  | 22.22436394 | 17.59876602 | 17.89592408 | 6.101442264 |
| TRAPPC8  | 22878  | 6283  | 9.271058076 | 8.547298587 | 8.844165564 | 8.827870197 |
| MXD1     | 4084   | 5630  | 10.34636908 | 10.96352641 | 13.54774402 | 50.01395175 |
| ZCCHC8   | 55596  | 2874  | 20.26793942 | 15.89446777 | 19.77578316 | 19.01732533 |
| WDR46    | 9277   | 2363  | 24.65089204 | 23.57518882 | 27.62885792 | 13.96356524 |
| CLIP1    | 6249   | 5898  | 9.876239046 | 7.102839052 | 11.3201059  | 17.46970011 |
| HAUS3    | 79441  | 5620  | 10.36477898 | 7.811038949 | 10.71461868 | 6.591544826 |
| INF2     | 64423  | 4725  | 12.32805458 | 4.52739423  | 10.19532817 | 1.713683496 |
| PRKRA    | 8575   | 1906  | 30.56141547 | 18.12123092 | 34.36425814 | 5.522718192 |
| DCK      | 1633   | 2618  | 22.24983113 | 23.74725708 | 24.13068894 | 16.08296543 |
| TBC1D4   | 9882   | 6363  | 9.154495976 | 0.770441469 | 5.180013008 | 0.190880587 |
| SPHK2    | 56848  | 3012  | 19.33932865 | 20.93680272 | 19.92193633 | 14.51681089 |
| USP3     | 9960   | 2345  | 24.84010998 | 18.62482141 | 25.85873199 | 25.29281742 |
| C16orf58 | 64755  | 2774  | 20.99857891 | 22.33146588 | 16.8327081  | 11.96767611 |
| PARL     | 55486  | 1423  | 40.9346858  | 40.71433453 | 45.28591161 | 20.34246479 |
| CPSF4    | 10898  | 1829  | 31.73628853 | 19.73695731 | 27.95566553 | 10.84637975 |
| NFYB     | 4801   | 3482  | 16.67021014 | 11.39121708 | 15.53385954 | 5.871716013 |
| MAP2K2   | 5605   | 1759  | 32.99924487 | 35.3441268  | 35.19410749 | 32.91339102 |
| HMGN5    | 79366  | 2126  | 27.30276186 | 20.12411828 | 20.07503377 | 7.141187545 |
| VPS13B   | 157680 | 14111 | 4.113505189 | 6.727143626 | 4.536835284 | 6.641950503 |
| TSPYL1   | 7259   | 5259  | 11.03739717 | 10.9318944  | 8.798509743 | 11.12415695 |
| SMAD4    | 4089   | 8789  | 6.604354503 | 4.969303244 | 5.601245807 | 4.053644314 |
| UTP14A   | 10813  | 2577  | 22.52451367 | 25.85447138 | 30.17182467 | 12.01847731 |
| OGFR     | 11054  | 2423  | 23.9561171  | 67.68669252 | 22.32311139 | 120.6385795 |
| NT5C3    | 51251  | 1755  | 33.07445682 | 37.32923608 | 35.51510234 | 497.017647  |
| ZNF621   | 285268 | 8287  | 7.004425211 | 6.184568299 | 6.424974039 | 3.615237326 |

|           |        |       |             |             |             |             |
|-----------|--------|-------|-------------|-------------|-------------|-------------|
| ZNF367    | 195828 | 3714  | 15.62888307 | 9.179698644 | 12.17418927 | 3.052239183 |
| ECI2      | 10455  | 1481  | 39.19356632 | 18.80762025 | 34.80991342 | 8.611086    |
| RABL3     | 285282 | 3883  | 14.89603027 | 9.813131365 | 10.82813997 | 5.4738683   |
| LRIF1     | 55791  | 3349  | 17.27121098 | 17.43271526 | 15.39369417 | 25.62849743 |
| DLGAP4    | 22839  | 4894  | 11.81881601 | 6.647644457 | 14.5490324  | 9.05842276  |
| EIF2C1    | 26523  | 7478  | 7.734860331 | 48.80983386 | 8.984829381 | 40.52367048 |
| SYAP1     | 94056  | 3533  | 16.37171966 | 12.10978643 | 15.48903289 | 16.329529   |
| FAM134A   | 79137  | 4625  | 12.5062239  | 11.37048943 | 11.87762983 | 11.24847952 |
| BOP1      | 23246  | 2422  | 23.88162079 | 15.548606   | 26.08346146 | 6.352020473 |
| AKR1B1    | 231    | 1416  | 40.84836551 | 21.7167447  | 41.18262298 | 9.864118322 |
| ZCCHC6    | 79670  | 5696  | 10.15472008 | 13.02726194 | 10.23781498 | 21.60757526 |
| POLR3E    | 55718  | 2640  | 21.90957786 | 18.73820304 | 22.16889352 | 7.66775996  |
| CUL2      | 8453   | 4285  | 13.49854972 | 10.40059205 | 16.27163856 | 11.1016996  |
| LSM14B    | 149986 | 2618  | 22.01562238 | 13.78872992 | 20.57968455 | 14.3045606  |
| GPATCH4   | 54865  | 2172  | 26.53632569 | 23.18608966 | 30.35029721 | 6.803548341 |
| USF2      | 7392   | 1732  | 33.27765554 | 36.92435365 | 27.20352297 | 40.67277385 |
| CHID1     | 66005  | 3558  | 16.19924097 | 11.96206936 | 17.28045687 | 6.429022348 |
| PLRG1     | 5356   | 3374  | 17.08266135 | 15.5864     | 17.4087622  | 11.27937944 |
| ZNF259    | 8882   | 1810  | 31.73067029 | 26.46907581 | 35.13630562 | 20.01920799 |
| NIPSNAP1  | 8508   | 2259  | 25.42386597 | 16.67052843 | 17.95780176 | 10.8428032  |
| UBXN7     | 26043  | 4740  | 12.11656397 | 9.07314518  | 12.34723183 | 7.089280855 |
| PIK3R2    | 5296   | 3953  | 14.5288422  | 15.10730066 | 14.85888279 | 6.401115069 |
| RPGR      | 6103   | 4718  | 12.17306342 | 11.90204251 | 10.74784712 | 4.762527297 |
| TNFRSF10B | 8795   | 4154  | 13.82583371 | 12.44515716 | 18.20894188 | 20.56451135 |
| PDP2      | 57546  | 7042  | 8.155710483 | 6.170459177 | 6.750791154 | 3.650733541 |
| N4BP2     | 55728  | 6822  | 8.388760928 | 5.585515844 | 8.888702215 | 7.922677574 |
| SNRNP48   | 154007 | 4173  | 13.71390536 | 8.703984571 | 10.98701012 | 4.753900927 |
| RRP1      | 8568   | 1820  | 31.44402585 | 18.61020224 | 31.92489526 | 7.674500848 |
| APOL6     | 80830  | 10156 | 5.634908138 | 13.38400332 | 4.077571212 | 58.1215601  |
| FOXP1     | 27086  | 6222  | 9.197706051 | 10.8157298  | 8.455465378 | 7.352768085 |
| LEPRE1    | 64175  | 2715  | 21.07849984 | 17.39982658 | 23.11291865 | 13.56981696 |
| MTCH1     | 23787  | 1890  | 30.2794323  | 38.90729416 | 30.63070085 | 30.84630293 |
| ZNF438    | 220929 | 3431  | 16.67972225 | 6.689526823 | 9.852976339 | 18.1719877  |
| SLC25A40  | 55972  | 3152  | 18.15613168 | 26.93504216 | 23.79634844 | 49.25854628 |
| MRPL38    | 64978  | 1614  | 35.45732779 | 31.89241027 | 35.47594196 | 15.42673491 |
| SRSF8     | 10929  | 4335  | 13.20141339 | 19.89302168 | 13.40330089 | 9.432671353 |
| LPIN1     | 23175  | 5363  | 10.63280643 | 12.88050201 | 7.642969178 | 19.77861723 |
| HBXIP     | 10542  | 855   | 66.69443378 | 66.45887089 | 65.73303687 | 62.03083286 |
| CCDC117   | 150275 | 3999  | 14.2595001  | 11.36730875 | 14.37095651 | 8.60537802  |
| ASTN2     | 23245  | 3519  | 16.20452995 | 22.16295529 | 16.39123042 | 27.49673103 |
| MUS81     | 80198  | 2406  | 23.70064043 | 24.8209308  | 25.81783867 | 18.76210991 |
| STRN      | 6801   | 3479  | 16.39084245 | 16.46105202 | 14.93994001 | 20.48144862 |
| SP110     | 3431   | 2591  | 22.00839092 | 35.77707327 | 18.83704356 | 194.4598379 |
| GPN3      | 51184  | 1626  | 35.06995134 | 22.33808586 | 35.21412689 | 18.54975435 |
| SRPRB     | 58477  | 2880  | 19.79991003 | 14.77813986 | 16.8734358  | 5.131009374 |
| PRKX      | 5613   | 6084  | 9.339144431 | 7.947845593 | 12.32841721 | 4.824488022 |
| CHEK1     | 1111   | 2748  | 20.67662108 | 16.29889725 | 24.834417   | 6.482438115 |
| HELLS     | 3070   | 3165  | 17.95240275 | 13.1657858  | 19.89347832 | 3.517721157 |
| DVL1      | 1855   | 2941  | 19.31973979 | 12.57743137 | 14.08086135 | 3.854476819 |
| PNPLA6    | 10908  | 4591  | 12.37624803 | 23.05500441 | 14.35871173 | 39.94784357 |
| POT1      | 25913  | 4215  | 13.48027395 | 12.26504931 | 12.98285959 | 11.71830191 |
| TSC1      | 7248   | 8626  | 6.586987563 | 6.070679448 | 7.397171103 | 5.045467834 |
| FANCG     | 2189   | 2649  | 21.44936003 | 18.25394209 | 21.45549294 | 6.648286552 |
| CCDC90B   | 60492  | 1585  | 35.84817332 | 34.0224036  | 37.05814742 | 38.44232666 |
| CANT1     | 124583 | 3545  | 16.02802672 | 17.34889168 | 15.5558033  | 17.35920292 |
| GOT1      | 2805   | 2140  | 26.55110033 | 34.25792209 | 25.07772401 | 19.39154996 |
| UTP14C    | 9724   | 5537  | 10.26175812 | 10.1818077  | 10.76075541 | 9.871011919 |
| TOP1MT    | 116447 | 1923  | 29.54724634 | 49.47974851 | 26.14964805 | 29.15901978 |
| UBA5      | 79876  | 3044  | 18.66601666 | 12.37145983 | 21.44776323 | 6.450591231 |
| NLRC3     | 197358 | 6401  | 8.8766372   | 7.101682188 | 8.64811865  | 5.882169741 |
| GRAMD4    | 23151  | 4337  | 13.05394709 | 12.99900144 | 9.694643189 | 3.173890404 |
| HVCN1     | 84329  | 1736  | 32.61230907 | 2.438836987 | 49.65678723 | 17.49097318 |

|          |        |       |             |             |             |             |
|----------|--------|-------|-------------|-------------|-------------|-------------|
| PBK      | 55872  | 1899  | 29.81304294 | 12.55560678 | 20.47203586 | 5.329880541 |
| ASCC1    | 51008  | 2438  | 23.2218903  | 23.21554632 | 22.70574548 | 18.93100113 |
| ATG12    | 9140   | 4447  | 12.73104757 | 20.04341666 | 14.82366664 | 20.93934719 |
| OSTC     | 58505  | 1103  | 51.32816731 | 42.4250805  | 57.27483558 | 19.45372572 |
| FOSL2    | 2355   | 4015  | 14.1008639  | 8.158506764 | 17.05012769 | 42.5024985  |
| DCTN3    | 11258  | 947   | 59.78349371 | 75.06190753 | 62.47067918 | 51.5156874  |
| C10orf76 | 79591  | 4101  | 13.8051618  | 17.60492315 | 13.75592082 | 19.34945484 |
| CEP120   | 153241 | 4728  | 11.97440113 | 11.87686898 | 13.76389731 | 9.933057573 |
| CUEDC2   | 79004  | 1203  | 47.06148674 | 34.63816463 | 43.55662578 | 23.22126607 |
| SNRK     | 54861  | 5236  | 10.81263723 | 15.27825321 | 11.90393518 | 28.72510412 |
| PSMD5    | 5711   | 3411  | 16.59776269 | 14.63339824 | 17.3438092  | 12.34394708 |
| TBL1X    | 6907   | 5715  | 9.906381198 | 0.19495423  | 11.23894444 | 1.310563067 |
| ZNHIT1   | 10467  | 1208  | 46.86669582 | 42.42675289 | 45.65010159 | 30.66596185 |
| CES2     | 8824   | 4193  | 13.45351357 | 22.37361323 | 12.04318101 | 20.4215142  |
| TBC1D8   | 11138  | 4163  | 13.55046418 | 12.4717789  | 13.80481746 | 22.22195301 |
| PQBP1    | 10084  | 1147  | 49.18097854 | 39.24341963 | 56.36716389 | 39.00329443 |
| TAF2     | 6873   | 5049  | 11.17262475 | 8.385464468 | 9.164460831 | 7.778015332 |
| SIRPA    | 140885 | 4201  | 13.42789393 | 86.14146156 | 16.29523035 | 208.8857703 |
| PLEKHM2  | 23207  | 4138  | 13.6323302  | 14.70114136 | 15.164711   | 30.08548833 |
| ERCC6L   | 54821  | 4224  | 13.35477803 | 7.965846448 | 16.40658185 | 3.258797983 |
| SEMA4D   | 10507  | 4642  | 12.15221508 | 15.40915377 | 20.98282529 | 32.53165269 |
| ZADH2    | 284273 | 5495  | 10.26580207 | 9.205281062 | 9.035836018 | 5.341616948 |
| NUPL2    | 11097  | 1799  | 31.35663278 | 38.27420766 | 27.71717826 | 31.05634585 |
| YES1     | 7525   | 4685  | 11.99705362 | 11.12974349 | 7.847075449 | 10.28347265 |
| EXOC2    | 55770  | 4458  | 12.60793993 | 10.89670823 | 11.75384047 | 13.34995193 |
| MPI      | 4351   | 1771  | 31.73698262 | 24.15803245 | 29.3484197  | 14.40205349 |
| CNST     | 163882 | 5233  | 10.74072162 | 9.197756527 | 8.31734394  | 10.2897148  |
| CSPP1    | 79848  | 4735  | 11.87036879 | 6.070837662 | 14.72523152 | 2.13758039  |
| C2CD3    | 26005  | 6300  | 8.921618446 | 10.43422889 | 8.518464982 | 11.14965325 |
| SLC2A4RG | 56731  | 2296  | 24.48005061 | 11.74336013 | 29.63139946 | 4.143796411 |
| PSMD10   | 5716   | 1585  | 35.46132253 | 27.27415826 | 25.32751083 | 15.96442137 |
| TMEM14C  | 51522  | 1201  | 46.79949726 | 34.13922897 | 49.96242483 | 21.74298361 |
| WDR11    | 55717  | 4746  | 11.84285634 | 15.35320015 | 11.26317839 | 11.47352805 |
| H1FX     | 8971   | 1524  | 36.74659452 | 41.37903529 | 35.63004178 | 77.70399267 |
| C9orf123 | 90871  | 2487  | 22.51781666 | 16.48621391 | 16.99113481 | 6.348794254 |
| PATZ1    | 23598  | 3812  | 14.69092603 | 10.75582739 | 11.19609701 | 6.319264085 |
| C16orf80 | 29105  | 1308  | 42.81483948 | 24.36167731 | 43.2907615  | 17.17859617 |
| SFXN4    | 119559 | 1400  | 40.00129289 | 47.1131962  | 44.06796451 | 18.36318971 |
| SNRNP27  | 11017  | 1452  | 38.5687397  | 37.29224683 | 40.74361789 | 47.54011175 |
| HADH     | 3033   | 2037  | 27.49229752 | 20.67519755 | 24.68619205 | 5.266926724 |
| RHOXF2B  | 727940 | 1309  | 42.78213143 | 24.51329763 | 39.06104832 | 11.59829238 |
| PIGK     | 10026  | 4626  | 12.10588198 | 13.00579872 | 12.05775551 | 6.82639486  |
| ADAM17   | 6868   | 3572  | 15.67799833 | 22.27079184 | 19.22383747 | 44.14672011 |
| NDUFA11  | 126328 | 2633  | 21.26920245 | 16.75688248 | 19.01803587 | 9.225774233 |
| ALDOC    | 230    | 1665  | 33.63472075 | 53.93487805 | 31.08994987 | 50.21208432 |
| METTL9   | 51108  | 3212  | 17.4351837  | 6.868130694 | 23.48339346 | 19.97819102 |
| HPCAL1   | 3241   | 1920  | 29.1676094  | 161.6697551 | 35.43421519 | 209.9145136 |
| RALGAPA1 | 253959 | 7882  | 7.10502538  | 5.965198741 | 6.138570204 | 5.187849571 |
| NRBF2    | 29982  | 1916  | 29.22850211 | 40.00753839 | 39.36777652 | 76.17495313 |
| UFL1     | 23376  | 4219  | 13.27371653 | 14.89424439 | 14.2225343  | 9.596058922 |
| C19orf53 | 28974  | 934   | 59.9591114  | 52.48735615 | 66.73340964 | 34.46058802 |
| SDHC     | 6391   | 2858  | 19.52324138 | 20.03778866 | 21.73468154 | 14.94488806 |
| SNX10    | 29887  | 2712  | 20.57427134 | 14.78977996 | 26.72222461 | 44.48657903 |
| C4orf21  | 55345  | 6740  | 8.278549536 | 7.471837797 | 7.335405662 | 4.955602728 |
| FBXO28   | 23219  | 5457  | 10.22492649 | 10.73941655 | 10.91850883 | 15.50582091 |
| SKAP2    | 8935   | 3984  | 14.00537748 | 40.60655851 | 13.84169747 | 51.11532031 |
| ITPR1    | 3708   | 10197 | 5.47194507  | 10.75156231 | 5.366554201 | 23.62364881 |
| MKNK2    | 2872   | 3805  | 14.66423755 | 15.75348021 | 28.93018677 | 23.51473257 |
| STYX     | 6815   | 4879  | 11.43624183 | 9.180030669 | 10.43648852 | 10.5384159  |
| MINOS1   | 440574 | 3967  | 14.06539548 | 12.47009226 | 12.78254165 | 7.450116963 |
| PHTF2    | 57157  | 5102  | 10.89632256 | 11.09359113 | 9.60761753  | 13.84705472 |
| MTRF1L   | 54516  | 3878  | 14.33549193 | 13.15850562 | 14.81935407 | 12.42343202 |

|          |        |       |             |             |             |             |
|----------|--------|-------|-------------|-------------|-------------|-------------|
| GGPS1    | 9453   | 2921  | 19.03219367 | 14.49442318 | 12.6582791  | 15.73137689 |
| TMEM181  | 57583  | 5397  | 10.30072961 | 7.473173233 | 11.50967572 | 7.576548141 |
| PUS7L    | 83448  | 4379  | 12.69537285 | 10.63531197 | 13.55812239 | 7.072759998 |
| PPP2R5A  | 5525   | 3135  | 17.73302638 | 21.03938586 | 21.36436024 | 29.25048642 |
| UQCRCQ   | 27089  | 1585  | 35.07447174 | 38.80241072 | 33.59227752 | 19.28502101 |
| YDJC     | 150223 | 1350  | 41.18002793 | 35.98335205 | 34.58809797 | 16.49420365 |
| LAMTOR1  | 55004  | 1198  | 46.40487288 | 85.37579491 | 52.90937263 | 81.61364007 |
| ATXN7    | 6314   | 7242  | 7.676475795 | 7.507756846 | 7.993927729 | 16.54762315 |
| RHOH     | 58480  | 4386  | 12.67511112 | 27.73977334 | 13.7773465  | 6.923011729 |
| ANKRD10  | 55608  | 2495  | 22.19986034 | 29.11561332 | 21.00145123 | 43.24432223 |
| ST3GAL2  | 6483   | 4450  | 12.44688799 | 15.97384864 | 16.76034174 | 41.85046155 |
| SLC4A1AP | 22950  | 2982  | 18.57432983 | 14.422102   | 18.77614412 | 18.87163779 |
| ATXN1L   | 342371 | 7895  | 7.015662006 | 5.644906517 | 7.305983515 | 8.948406988 |
| ECHDC1   | 55862  | 2354  | 23.52958859 | 21.5827749  | 27.0164457  | 17.88666249 |
| LAIR1    | 3903   | 2816  | 19.66926546 | 42.33504486 | 17.70710358 | 20.2716404  |
| NF2      | 4771   | 6106  | 9.071184333 | 6.824387823 | 6.505328388 | 5.337544536 |
| GNA12    | 2768   | 4398  | 12.59405447 | 7.144021953 | 7.878740533 | 4.556720653 |
| RPRD1B   | 58490  | 3895  | 14.22044969 | 13.1010744  | 12.58486897 | 8.575292012 |
| NAA60    | 79903  | 2692  | 20.57527918 | 28.30935296 | 25.19405958 | 32.86085182 |
| CCDC9    | 26093  | 2093  | 26.36610863 | 19.27028951 | 21.40103651 | 28.24138939 |
| LONP2    | 83752  | 4342  | 12.70941165 | 13.0866731  | 13.23571052 | 11.60865658 |
| FOXRED2  | 80020  | 5019  | 10.9950718  | 7.547630286 | 10.69263387 | 3.266933234 |
| LYL1     | 4066   | 1788  | 30.86368309 | 40.3790771  | 34.15061299 | 25.47343074 |
| ZNF714   | 148206 | 8808  | 6.265243571 | 6.805403292 | 6.164870989 | 4.711389294 |
| MCPH1    | 79648  | 3773  | 14.62609737 | 12.81598001 | 11.59182232 | 8.530662393 |
| VPS52    | 6293   | 2990  | 18.45627604 | 23.25210623 | 20.13918294 | 17.26400002 |
| BRAP     | 8315   | 4043  | 13.64933598 | 15.15681135 | 15.62556113 | 16.62289946 |
| FNTA     | 2339   | 1710  | 32.27150022 | 30.88382824 | 35.95547693 | 29.1213452  |
| SEPT8    | 23176  | 4344  | 12.70356017 | 11.79823147 | 10.7004253  | 6.710349048 |
| NEK4     | 6787   | 3745  | 14.73545137 | 11.95977827 | 14.61221714 | 6.918796918 |
| AURKB    | 9212   | 1253  | 43.87859474 | 34.14515201 | 34.90498452 | 13.73220539 |
| PTGES2   | 80142  | 2120  | 25.93390528 | 23.75480507 | 27.90553452 | 14.13182628 |
| UBE2Q2   | 92912  | 3109  | 17.68410396 | 10.39264692 | 15.01895537 | 8.334157111 |
| ZNF142   | 7701   | 5940  | 9.25587192  | 10.01621664 | 8.856886461 | 6.440918367 |
| TRAM2    | 9697   | 7065  | 7.782006964 | 3.374819146 | 7.297025021 | 2.005664601 |
| TIMM50   | 92609  | 2572  | 21.37631384 | 12.90904744 | 21.27634261 | 5.115814966 |
| MBTPS2   | 51360  | 4541  | 12.10743871 | 12.02246372 | 10.93413762 | 6.374659195 |
| ZNF410   | 57862  | 2207  | 24.91159003 | 27.66477373 | 22.88040687 | 29.99285826 |
| ALS2     | 57679  | 6935  | 7.927884528 | 5.944347033 | 15.14182068 | 9.457383071 |
| SLC5A3   | 6526   | 11579 | 4.748240712 | 13.91381217 | 7.39013113  | 19.72016214 |
| UQCR10   | 29796  | 993   | 55.36745136 | 46.90033345 | 57.87457713 | 37.91718883 |
| MRPL35   | 51318  | 3323  | 16.54525405 | 16.29501727 | 19.32909042 | 9.320377981 |
| VGLL4    | 9686   | 3783  | 14.53340714 | 13.90127243 | 14.13033165 | 22.09968818 |
| RYK      | 6259   | 2942  | 18.68792631 | 22.49534581 | 18.60052794 | 15.27505356 |
| COPS8    | 10920  | 2339  | 23.50572005 | 16.86249902 | 21.67949668 | 10.47195058 |
| UBASH3B  | 84959  | 6917  | 7.948515137 | 8.665894491 | 13.19575205 | 9.979505894 |
| SOLH     | 6650   | 4759  | 11.55282185 | 10.25433031 | 12.29793631 | 7.911697523 |
| SNUPN    | 10073  | 1803  | 30.49355474 | 17.79695319 | 24.02294846 | 8.869595215 |
| RBM4     | 5936   | 3106  | 17.63538089 | 18.4378622  | 18.02654918 | 13.42573914 |
| FBXL20   | 84961  | 10381 | 5.276514116 | 4.765326656 | 5.454610928 | 3.70498834  |
| NUDCD1   | 84955  | 3965  | 13.81475234 | 9.722586245 | 12.68241443 | 11.33397417 |
| CYBRD1   | 79901  | 4390  | 12.47733327 | 11.82688281 | 9.5776008   | 4.841692622 |
| VOPP1    | 81552  | 2962  | 18.49273904 | 24.90128921 | 17.33362492 | 35.26444743 |
| LRFN4    | 78999  | 2546  | 21.51433348 | 6.73924459  | 14.85466311 | 2.782800551 |
| TOMM5    | 401505 | 932   | 58.77198824 | 37.53726556 | 68.91691787 | 20.63384333 |
| BTBD7    | 55727  | 8448  | 6.483841505 | 6.462358873 | 6.27751836  | 5.631011221 |
| CLTCL1   | 8218   | 5542  | 9.883704987 | 10.21282965 | 6.671749051 | 2.301158132 |
| WRNIP1   | 56897  | 2670  | 20.51516593 | 24.5366327  | 21.28674187 | 19.18146155 |
| ASF1A    | 25842  | 2525  | 21.69326457 | 24.00415455 | 18.91103211 | 28.1396162  |
| ERC1     | 23085  | 9471  | 5.783496255 | 5.717278259 | 4.930200851 | 7.160138221 |
| RNF126   | 55658  | 1665  | 32.89819402 | 25.96368819 | 28.42509702 | 16.16999326 |
| ZBTB7B   | 51043  | 3630  | 15.0896675  | 28.05359144 | 16.64667817 | 34.18426804 |



|           |        |       |             |             |             |             |
|-----------|--------|-------|-------------|-------------|-------------|-------------|
| MAP3K2    | 10746  | 4941  | 11.04454703 | 9.69622085  | 13.72645383 | 16.83834501 |
| TRIM8     | 81603  | 2753  | 19.82241441 | 31.08163855 | 21.64268169 | 46.17701632 |
| RRM2B     | 50484  | 4932  | 11.06470131 | 6.189796798 | 8.696432797 | 8.906541618 |
| HEXB      | 3074   | 1919  | 28.43726257 | 8.476699315 | 35.67288311 | 33.54475165 |
| DCAF10    | 79269  | 7932  | 6.87986723  | 8.596419759 | 6.259697292 | 11.28007532 |
| ATP5H     | 10476  | 628   | 86.89666699 | 108.5777094 | 90.83898976 | 84.45280588 |
| SCP2      | 6342   | 2725  | 20.02609426 | 25.43154677 | 21.0121726  | 23.10289041 |
| HDDC2     | 51020  | 1615  | 33.79015905 | 32.01063954 | 33.62240475 | 17.17198404 |
| DEPDC1B   | 55789  | 2516  | 21.68962912 | 15.67622623 | 18.05493787 | 6.114703333 |
| MOB1B     | 92597  | 6960  | 7.840676274 | 6.403238067 | 6.860683343 | 7.212982473 |
| RNASEH2C  | 84153  | 2785  | 19.59465238 | 16.72245282 | 15.5523792  | 12.93800273 |
| ZNF646    | 9726   | 6221  | 8.772079548 | 7.987733274 | 9.237977028 | 14.15472679 |
| UVRAG     | 7405   | 5166  | 10.56351275 | 9.360180524 | 8.425215029 | 12.4999627  |
| CCNB1IP1  | 57820  | 1681  | 32.46347821 | 44.00978664 | 25.01229477 | 14.45060295 |
| BMPR2     | 659    | 12086 | 4.515233069 | 5.033371085 | 3.478873698 | 14.88989402 |
| POLR2H    | 5437   | 821   | 66.22012265 | 47.76924789 | 69.48463528 | 16.766337   |
| NR2C1     | 7181   | 4029  | 13.49384976 | 15.59662872 | 13.68709921 | 14.01778426 |
| ZNFX1     | 57169  | 7371  | 7.375759151 | 11.88078213 | 8.197997795 | 81.94922359 |
| SZT2      | 23334  | 10217 | 5.321201987 | 6.368517563 | 3.722350694 | 7.330789791 |
| ACAA2     | 10449  | 1952  | 27.85180364 | 33.10526566 | 28.90011849 | 19.49622246 |
| ANKRD49   | 54851  | 1924  | 28.25713134 | 23.39511555 | 30.19922525 | 24.83015159 |
| RASGRP2   | 10235  | 2310  | 23.53537693 | 45.72410934 | 26.43346149 | 23.83577953 |
| CASP8     | 841    | 2938  | 18.50467008 | 29.5037149  | 18.33819406 | 55.3268812  |
| NDUFV3    | 4731   | 2151  | 25.18007184 | 35.11867974 | 29.56611491 | 20.89223969 |
| CHPF2     | 54480  | 3970  | 13.64290542 | 14.76196375 | 17.72237419 | 29.82893824 |
| COQ5      | 84274  | 1530  | 35.40021865 | 30.43923602 | 31.76176151 | 20.77211208 |
| CRLF3     | 51379  | 2954  | 18.33525204 | 18.93398912 | 17.09446783 | 28.84988196 |
| PRDM8     | 56978  | 4118  | 13.15258245 | 5.627634583 | 14.57136285 | 5.65306441  |
| CARKD     | 55739  | 2677  | 20.23247461 | 20.31048751 | 17.04800465 | 20.34118944 |
| BTBD2     | 55643  | 2656  | 20.39244523 | 20.7227685  | 15.35314719 | 11.88964707 |
| ZNF197    | 10168  | 4338  | 12.438439   | 11.24950621 | 10.22816964 | 11.52603254 |
| PREX1     | 57580  | 6633  | 8.134772857 | 9.708826457 | 9.556072427 | 18.92143751 |
| USP42     | 84132  | 5135  | 10.50787699 | 8.765764814 | 10.12191846 | 10.52551245 |
| ZNF622    | 90441  | 1710  | 31.55435577 | 40.26625707 | 30.51890997 | 33.85652328 |
| KIAA0146  | 23514  | 3220  | 16.75712682 | 15.70901225 | 17.32272578 | 10.43577368 |
| SKIV2L    | 6499   | 4187  | 12.88701895 | 12.66639096 | 13.9779983  | 8.992540843 |
| GRPEL2    | 134266 | 4105  | 13.1444454  | 13.1908264  | 11.42636225 | 6.60790929  |
| TUBGCP5   | 114791 | 3934  | 13.71579775 | 9.062844321 | 16.00479382 | 3.396112088 |
| MYLIP     | 29116  | 3086  | 17.4847532  | 16.31891988 | 17.32179022 | 12.79119516 |
| CYP1B1    | 1545   | 5160  | 10.41735701 | 3.757062708 | 15.88730376 | 18.32059671 |
| MFF       | 56947  | 2032  | 26.4535247  | 23.90626244 | 27.34640366 | 19.52561867 |
| BCAP29    | 55973  | 6034  | 8.908445839 | 10.78341796 | 9.73436587  | 10.80246832 |
| COPG2     | 26958  | 3154  | 17.04298104 | 16.39099013 | 15.60854451 | 6.931616106 |
| ERMP1     | 79956  | 5355  | 10.03801348 | 13.2742533  | 10.33736834 | 10.50891203 |
| LOC144438 | 144438 | 4024  | 13.3582411  | 12.40420511 | 12.91651374 | 12.42542971 |
| MRI1      | 84245  | 3177  | 16.9195978  | 13.60703206 | 16.62612223 | 5.989396638 |
| ZBTB1     | 22890  | 4119  | 13.05014863 | 13.95747333 | 16.1579752  | 17.83968858 |
| PPP1R12B  | 4660   | 11108 | 4.839175567 | 5.035200204 | 4.260693783 | 2.678883944 |
| WDR70     | 55100  | 2247  | 23.92236858 | 19.93296379 | 20.87459592 | 13.60336373 |
| UBTD2     | 92181  | 3015  | 17.82871051 | 11.08620322 | 17.02892106 | 9.601103616 |
| SLC31A1   | 1317   | 4797  | 11.20566233 | 9.33695427  | 13.38973681 | 17.68140371 |
| CCDC91    | 55297  | 2352  | 22.8544057  | 15.25342782 | 22.27832518 | 22.11914021 |
| TET2      | 54790  | 9796  | 5.48729708  | 6.437489769 | 6.79406899  | 20.10650099 |
| RWDD4     | 201965 | 2593  | 20.65143696 | 12.11701062 | 20.37068659 | 9.133890075 |
| MBD1      | 4152   | 3284  | 16.30608283 | 15.40286828 | 15.05500431 | 12.94459842 |
| CAPN7     | 23473  | 4385  | 12.21189875 | 10.06177231 | 10.45582513 | 8.494164375 |
| TRIT1     | 54802  | 2146  | 24.95301772 | 11.11048335 | 21.85704428 | 6.13134953  |
| TAF5L     | 27097  | 4139  | 12.93770863 | 9.744555675 | 11.68983096 | 5.575474843 |
| CBR4      | 84869  | 3523  | 15.19987966 | 11.44840078 | 15.71291725 | 6.320515165 |
| CARS2     | 79587  | 1865  | 28.71269492 | 37.51713834 | 28.5489329  | 35.60143005 |
| MUDENG    | 55745  | 3110  | 17.21838457 | 18.84405019 | 19.97354336 | 23.82281796 |
| RAE1      | 8480   | 1839  | 29.11863841 | 26.65752618 | 26.76962991 | 19.15313875 |

|           |        |       |             |             |             |             |
|-----------|--------|-------|-------------|-------------|-------------|-------------|
| INPP5A    | 3632   | 2938  | 18.22640437 | 5.915911984 | 16.46841741 | 2.067006769 |
| ZNF498    | 221785 | 4359  | 12.28473871 | 8.792663862 | 13.37797525 | 6.687257689 |
| NT5DC3    | 51559  | 7214  | 7.394620163 | 3.675781742 | 5.564749745 | 1.178543422 |
| CBX4      | 8535   | 2655  | 20.09219957 | 19.47163196 | 21.88448564 | 24.3982057  |
| TRMT1     | 55621  | 2282  | 23.3763321  | 18.45546775 | 22.77653431 | 5.677233667 |
| RRP36     | 88745  | 1177  | 45.32267618 | 45.43742085 | 45.41635057 | 33.53749216 |
| LY6E      | 4061   | 1194  | 44.67737844 | 68.67875041 | 42.29234335 | 656.1136513 |
| PLD1      | 5337   | 5607  | 9.513962878 | 6.040764773 | 10.55104926 | 9.964395608 |
| EHD1      | 10938  | 3482  | 15.32015791 | 93.94554314 | 20.38819064 | 95.22644386 |
| INPP5B    | 3633   | 4469  | 11.93662785 | 13.26325669 | 12.15041031 | 11.64113175 |
| KLHL12    | 59349  | 3338  | 15.98106347 | 15.62098509 | 16.20398409 | 13.40227044 |
| WDR77     | 79084  | 2428  | 21.97067128 | 14.59242046 | 19.84057891 | 6.41969623  |
| SETDB2    | 83852  | 6236  | 8.554328072 | 11.3989138  | 6.945698537 | 6.492266291 |
| KIF1B     | 23095  | 10585 | 5.039658938 | 4.778745341 | 5.149878926 | 10.02104149 |
| C16orf72  | 29035  | 3996  | 13.34954701 | 11.32007883 | 12.4782792  | 20.26314944 |
| RNASEH2A  | 10535  | 1148  | 46.46758699 | 30.66860992 | 46.01148984 | 16.22252212 |
| NCK2      | 8440   | 2527  | 21.10992871 | 16.93069864 | 27.50798832 | 13.53798094 |
| MKKS      | 8195   | 2678  | 19.91963774 | 15.97605507 | 20.51308363 | 7.861315066 |
| RAD51C    | 5889   | 1295  | 41.19288792 | 30.45666811 | 44.54111185 | 17.97630829 |
| ADCY9     | 115    | 7741  | 6.864798307 | 3.483110044 | 5.458849279 | 3.033425669 |
| TBL3      | 10607  | 2618  | 20.29809156 | 15.2356954  | 17.59361267 | 6.727009579 |
| CALML4    | 91860  | 4655  | 11.41576878 | 8.855863948 | 9.667809704 | 14.30700234 |
| LARS2     | 23395  | 4203  | 12.64344604 | 10.17936604 | 13.4723569  | 6.550160686 |
| SUCLG2    | 8801   | 2363  | 22.48853309 | 29.70473792 | 26.10882366 | 13.02123875 |
| GTF2H2B   | 653238 | 4374  | 12.14915494 | 7.183220976 | 10.28890127 | 3.424722419 |
| BUD13     | 84811  | 2216  | 23.98032658 | 23.63072243 | 25.74317941 | 12.78882708 |
| CHMP7     | 91782  | 3420  | 15.53812973 | 14.85551232 | 18.47197183 | 13.02173972 |
| TBCD      | 6904   | 4449  | 11.94434787 | 8.264192624 | 11.39769448 | 4.777484965 |
| PRKAR2A   | 5576   | 2381  | 22.23268271 | 14.78688122 | 24.93532883 | 7.056529032 |
| IFIH1     | 64135  | 3434  | 15.41526428 | 16.48209142 | 11.38255121 | 192.4076321 |
| RG9MTD1   | 54931  | 1631  | 32.45617261 | 23.90908635 | 37.17886359 | 15.01771454 |
| ZSCAN29   | 146050 | 5607  | 9.441058948 | 7.193279104 | 9.269850418 | 10.46983597 |
| CIC       | 23152  | 5473  | 9.672212228 | 9.079424209 | 8.994947816 | 13.09333409 |
| EIF1AD    | 84285  | 2836  | 18.66573255 | 16.26458595 | 21.15827653 | 11.92017634 |
| GTPBP10   | 85865  | 7550  | 7.011393049 | 5.046938952 | 6.408504682 | 3.67321248  |
| RCSD1     | 92241  | 3012  | 17.57503902 | 159.5783868 | 24.69197742 | 145.9745984 |
| TTLL4     | 9654   | 4997  | 10.59355964 | 25.68573672 | 9.89406327  | 34.59560716 |
| ATP6V1E1  | 529    | 1406  | 37.65008359 | 48.65550086 | 44.93182336 | 84.08140538 |
| SMARCA1   | 50485  | 3281  | 16.1341108  | 13.92279804 | 15.45514865 | 10.3034502  |
| LOC38879  | 388796 | 1186  | 44.63407886 | 32.12848996 | 54.51360622 | 12.63046868 |
| ERI3      | 79033  | 1769  | 29.92426089 | 18.64287018 | 27.7094769  | 7.666893057 |
| CDCA3     | 83461  | 1170  | 45.06977039 | 23.2355449  | 38.82583222 | 7.439693254 |
| HSPA13    | 6782   | 4001  | 13.17961294 | 10.5262128  | 14.46938881 | 10.62485909 |
| MAP4K2    | 5871   | 2971  | 17.74878201 | 23.17579925 | 25.10384408 | 35.36202621 |
| GTPBP2    | 54676  | 2996  | 17.60067802 | 24.46994435 | 17.27795946 | 52.56664065 |
| RSRC1     | 51319  | 1647  | 32.01677678 | 27.46510929 | 31.0448769  | 22.24628063 |
| C17orf70  | 80233  | 3877  | 13.60114299 | 10.57550013 | 12.97027939 | 5.012424773 |
| STAT2     | 6773   | 4576  | 11.52352084 | 19.57577344 | 11.35840282 | 189.4231624 |
| F8A1      | 8263   | 1720  | 30.65792521 | 37.05241153 | 33.53531387 | 25.42129907 |
| C14orf159 | 80017  | 3164  | 16.66612875 | 20.77611947 | 17.49576722 | 15.67480134 |
| CPSF3L    | 54973  | 2147  | 24.56061078 | 24.28637551 | 25.98005449 | 14.89695405 |
| SLC25A13  | 10165  | 3207  | 16.44266647 | 15.14734184 | 18.24941656 | 10.98304401 |
| DFFA      | 1676   | 3408  | 15.47289652 | 14.64627975 | 16.67711291 | 7.840554551 |
| C22orf28  | 51493  | 2081  | 25.33956336 | 18.20353503 | 25.17953908 | 16.82854075 |
| CTSZ      | 1522   | 1517  | 34.76046892 | 107.8175284 | 41.08701688 | 315.9865178 |
| CSTF1     | 1477   | 2323  | 22.61181454 | 19.47267973 | 19.91879584 | 11.93833587 |
| MRPL45    | 84311  | 1722  | 30.50362671 | 21.6103707  | 32.39208885 | 8.463924583 |
| CWF19L1   | 55280  | 2633  | 19.9495804  | 19.12654263 | 19.98097439 | 13.9155428  |
| DPM1      | 8813   | 1047  | 50.16928862 | 49.16365824 | 56.10044284 | 44.66195544 |
| DNMT3A    | 1788   | 4395  | 11.95159162 | 12.57394899 | 8.84559638  | 7.415482807 |
| SPG7      | 6687   | 3096  | 16.96616447 | 22.16810946 | 20.33684073 | 17.58829591 |
| ANKRD40   | 91369  | 4169  | 12.59948313 | 10.63653257 | 15.55874832 | 8.108807895 |

|          |        |      |             |             |             |             |
|----------|--------|------|-------------|-------------|-------------|-------------|
| PIK3CA   | 5290   | 3724 | 14.10506047 | 9.813254645 | 13.95704922 | 13.10025671 |
| ASCC2    | 84164  | 2799 | 18.76643272 | 21.57472582 | 19.47533706 | 24.95103884 |
| PTPN22   | 26191  | 3672 | 14.30480533 | 48.36537302 | 18.93047018 | 63.727605   |
| ORC3     | 23595  | 2589 | 20.28862309 | 17.12773436 | 20.64698518 | 16.96680698 |
| NUDT5    | 11164  | 1224 | 42.914416   | 30.76693114 | 41.94623939 | 17.86137026 |
| LIN7C    | 55327  | 4866 | 10.79474829 | 11.49424658 | 10.03016438 | 9.401751547 |
| PCIF1    | 63935  | 2703 | 19.4329431  | 18.38390259 | 18.21285586 | 14.3040743  |
| GMCL1    | 64395  | 2402 | 21.86812872 | 11.87451442 | 21.63865583 | 8.59606329  |
| THRA     | 7067   | 2566 | 20.39082581 | 8.944569964 | 20.91439181 | 4.812221606 |
| FAM116A  | 201627 | 4679 | 11.1824875  | 12.28699138 | 11.24383534 | 10.42644924 |
| HNRPLL   | 92906  | 3053 | 17.13817852 | 41.74919609 | 22.35341563 | 45.61777193 |
| IP6K2    | 51447  | 2319 | 22.56268177 | 24.02249728 | 21.22869745 | 28.28242846 |
| HIPK3    | 10114  | 4743 | 11.03159583 | 13.20176774 | 12.25032877 | 18.138787   |
| SNX6     | 58533  | 3080 | 16.98794124 | 12.29920663 | 21.95166352 | 29.31275093 |
| STXBP5   | 134957 | 6433 | 8.133508319 | 17.49269482 | 12.64489867 | 12.42956643 |
| TNIP2    | 79155  | 1993 | 26.25331612 | 41.48064528 | 25.12518236 | 38.39343211 |
| TMEM106  | 54664  | 6514 | 8.032370129 | 9.167816934 | 6.681710292 | 5.189686846 |
| BCORL1   | 63035  | 7127 | 7.341498389 | 6.909782984 | 7.05567184  | 5.99305319  |
| LPCAT3   | 10162  | 2297 | 22.68980098 | 31.04329957 | 22.07590019 | 31.72589929 |
| CSTB     | 1476   | 674  | 77.32711106 | 79.01633776 | 97.49192995 | 89.50118867 |
| EARS2    | 124454 | 3979 | 13.09838473 | 8.568333945 | 13.32809125 | 4.019070162 |
| CCM2     | 83605  | 1904 | 27.37314751 | 24.3430664  | 33.9564795  | 27.21732611 |
| PPP4R1   | 9989   | 3976 | 13.10826782 | 10.31217656 | 15.09176867 | 9.011546465 |
| PHC1     | 1911   | 5206 | 10.01123182 | 4.793941739 | 8.603989514 | 3.577306068 |
| CSNK1G3  | 1456   | 4462 | 11.68051834 | 10.13783841 | 9.65981428  | 8.166112804 |
| ASNA1    | 439    | 1298 | 40.15290666 | 38.96996875 | 38.57818832 | 24.95271038 |
| METTL8   | 79828  | 8154 | 6.39176758  | 3.47065869  | 5.052799665 | 1.787451329 |
| ZBTB7A   | 51341  | 4456 | 11.69624615 | 21.10309537 | 13.79799496 | 31.79986626 |
| OST4     | 1E+08  | 509  | 102.3938563 | 123.0176511 | 117.8877647 | 71.98354459 |
| IKBIP    | 121457 | 2935 | 17.75757167 | 8.351480518 | 18.06898641 | 5.44868149  |
| ACAD9    | 28976  | 2784 | 18.72071582 | 21.77100943 | 17.60706345 | 9.161651125 |
| HIGD1A   | 25994  | 2952 | 17.65530923 | 21.21137683 | 20.82786774 | 19.54343697 |
| CISD2    | 493856 | 5892 | 8.845633546 | 5.446012662 | 8.713882724 | 5.187840853 |
| ARRDC1   | 92714  | 1621 | 32.15204988 | 31.34229002 | 29.19666042 | 17.98257635 |
| SLC25A43 | 203427 | 2557 | 20.38266439 | 14.29196727 | 24.21057297 | 6.887489666 |
| PNMA1    | 9240   | 2666 | 19.47265067 | 11.2837256  | 17.35610005 | 6.454033515 |
| MARCKSL1 | 65108  | 1584 | 32.77404462 | 27.57273119 | 45.88507444 | 31.31001984 |
| PUS1     | 80324  | 2014 | 25.77660709 | 18.366547   | 22.76504132 | 6.834738173 |
| SLC25A37 | 51312  | 1865 | 27.83597141 | 24.01574779 | 26.39643399 | 17.58363314 |
| MCCC1    | 56922  | 2551 | 20.35048478 | 24.72036448 | 20.37477511 | 15.15637508 |
| VKORC1   | 79001  | 1042 | 49.82158031 | 42.98403995 | 43.79799276 | 29.33470087 |
| TRMT6    | 51605  | 2311 | 22.46390596 | 23.04500721 | 23.67925279 | 11.56235825 |
| RNASET2  | 8635   | 1250 | 41.53126935 | 96.79851825 | 33.97458963 | 85.99178098 |
| SUCLG1   | 8802   | 1475 | 35.19599097 | 40.94078479 | 40.96775712 | 26.21282225 |
| UBE2J2   | 118424 | 2396 | 21.66698109 | 17.85637541 | 20.98738448 | 13.26432867 |
| COX7A2L  | 9167   | 1145 | 45.3398137  | 38.5335123  | 48.1618539  | 24.75112735 |
| JRKL     | 8690   | 3577 | 14.45616453 | 9.032915652 | 10.51403062 | 7.753076384 |
| KAT5     | 10524  | 2347 | 22.03225416 | 18.89378111 | 21.78564646 | 19.92376112 |
| NAA20    | 51126  | 1079 | 47.92372615 | 33.2493626  | 41.7086693  | 20.82447061 |
| ZNF503   | 84858  | 3198 | 16.16938728 | 8.779524164 | 12.7510816  | 6.39315671  |
| FBXO38   | 81545  | 4413 | 11.71758453 | 12.32068323 | 10.72462872 | 13.44021229 |
| METTL5   | 29081  | 956  | 54.08964489 | 28.43680705 | 51.71614452 | 12.91648603 |
| SHFM1    | 7979   | 509  | 101.5907672 | 85.80590611 | 93.39699667 | 71.1881463  |
| SLC25A46 | 91137  | 2358 | 21.92947435 | 24.38118434 | 20.4295698  | 17.51292962 |
| PHF20L1  | 51105  | 6263 | 8.256378814 | 6.831211156 | 8.096494128 | 7.563205162 |
| CNOT10   | 25904  | 2741 | 18.86526834 | 17.47866735 | 21.5061833  | 13.14569048 |
| CARHSP1  | 23589  | 3029 | 17.07154193 | 13.31552193 | 12.27669792 | 8.487443247 |
| ZNF768   | 79724  | 2332 | 22.08632691 | 27.51964546 | 21.01975327 | 20.74635431 |
| STK39    | 27347  | 3288 | 15.66463332 | 7.793722246 | 13.30168662 | 1.662280809 |
| MON1B    | 22879  | 3328 | 15.47635647 | 29.72887982 | 15.30036884 | 20.25505149 |
| ABHD14B  | 84836  | 2447 | 21.04835078 | 21.58207858 | 18.8230805  | 8.768884133 |
| HIVEP2   | 3097   | 9732 | 5.292366867 | 10.23491678 | 4.776268753 | 23.31717585 |

|          |        |        |             |             |             |             |
|----------|--------|--------|-------------|-------------|-------------|-------------|
| UBE2B    | 7320   | 2631   | 19.57632624 | 15.75327988 | 22.00381019 | 24.23606683 |
| CD33     | 945    | 1466   | 35.13322943 | 42.40813032 | 32.86011295 | 24.57867504 |
| LOC40132 | 401321 | 4639   | 11.10267608 | 7.301264945 | 9.883335464 | 2.487269926 |
| TRAFD1   | 10906  | 3196   | 16.11555518 | 20.56809825 | 13.75069786 | 81.64293002 |
| S1PR3    | 1903   | 4221   | 12.15373802 | 1.372577542 | 13.36484987 | 0.863236089 |
| DPYD     | 1806   | 4451   | 11.52570842 | 7.309272517 | 7.025420059 | 8.595608874 |
| YTHDC2   | 64848  | 6308   | 8.132677264 | 8.124844244 | 8.507661602 | 6.706980399 |
| KCTD3    | 51133  | 3946   | 13.00074206 | 10.27763523 | 10.38754275 | 5.283875541 |
| RNF31    | 55072  | 3571   | 14.36598381 | 19.2817977  | 15.02837563 | 33.55863536 |
| TUT1     | 64852  | 2844   | 18.03830105 | 11.36101944 | 19.01860018 | 8.327769679 |
| HPS1     | 3257   | 3729   | 13.75728833 | 24.50024155 | 18.5844467  | 29.42248424 |
| MAP1S    | 55201  | 3278   | 15.65006961 | 22.90866832 | 16.951767   | 56.01067074 |
| DYM      | 54808  | 2628   | 19.52090113 | 21.19793424 | 19.4562071  | 10.24468751 |
| STAMBP   | 10617  | 2417   | 21.22504269 | 20.09827277 | 21.59178157 | 18.17420904 |
| KIAA0913 | 23053  | 5851   | 8.767890648 | 15.27190336 | 10.76104237 | 28.3697945  |
| RAB22A   | 57403  | 8702   | 5.871815906 | 6.017660413 | 6.361366063 | 7.443948075 |
| PPP2R1B  | 5519   | 5605   | 9.116242999 | 8.786088016 | 13.53277954 | 12.02654975 |
| BIRC5    | 332    | 2724   | 18.75790823 | 12.27052229 | 17.37437098 | 3.641341514 |
| PRKACB   | 5567   | 4529   | 11.28208037 | 15.54761059 | 10.35663878 | 9.296799182 |
| COPS4    | 51138  | 1765   | 28.94988216 | 23.10389876 | 32.32118162 | 18.4651824  |
| SGOL1    | 151648 | 4136   | 12.35409623 | 10.07488202 | 13.07758678 | 6.460495626 |
| PPARGC1B | 133522 | 10642  | 4.80140406  | 6.930804233 | 4.66565673  | 7.855959444 |
| DDX20    | 11218  | 3513   | 14.54498776 | 11.22726593 | 14.91563359 | 7.663831134 |
| ZNF275   | 10838  | 6320   | 8.084895888 | 5.500300446 | 6.853382291 | 3.587346938 |
| PPP1R11  | 6992   | 1664   | 30.7070565  | 46.06637233 | 31.99745184 | 40.75340691 |
| FABP5    | 2171   | 751    | 68.03800534 | 34.41889671 | 74.83588085 | 22.10275201 |
| USP25    | 29761  | 4968   | 10.28513326 | 12.0207648  | 8.718473446 | 28.11511985 |
| HDAC4    | 9759   | 8980   | 5.690038086 | 5.310266652 | 5.482110178 | 3.76454567  |
| OBFC2B   | 79035  | 1404   | 36.24797425 | 33.48838781 | 30.84998296 | 14.85055049 |
| TROVE2   | 6738   | 3257   | 15.62547002 | 12.65706069 | 15.43929174 | 10.75228532 |
| CCDC41   | 51134  | 3235   | 15.73173287 | 12.81201835 | 14.89116711 | 3.691901983 |
| COIL     | 8161   | 2649   | 19.21183686 | 17.32862705 | 18.90316665 | 9.170050417 |
| CNOT4    | 4850   | 3783   | 13.45285642 | 13.90127243 | 13.73937386 | 23.81201269 |
| ZNF639   | 51193  | 3013   | 16.89085823 | 14.79141618 | 16.2688565  | 8.398143999 |
| RABGAP1  | 23637  | 4999   | 10.18046726 | 7.132072326 | 11.8343135  | 10.40692494 |
| SFXN1    | 94081  | 2991   | 16.94676352 | 13.55919379 | 13.91611434 | 5.617384027 |
| BCR      | 613    | 6927   | 7.317420193 | 3.409883728 | 7.960924313 | 3.389887123 |
| SYNGR2   | 9144   | 1694   | 29.92194196 | 23.94070167 | 31.43079095 | 16.49066298 |
| DDX26B   | 203522 | 3852   | 13.15881871 | 17.70166187 | 11.79289296 | 42.4091621  |
| LYRM2    | 57226  | 5530   | 9.165961967 | 9.14701979  | 8.176299988 | 6.845243648 |
| ARMC8    | 25852  | 3832   | 13.22749731 | 20.46897313 | 18.19519083 | 28.73729161 |
| CEBPG    | 1054   | 3750   | 13.51673858 | 9.150995587 | 14.02930815 | 4.210520349 |
| ANGEL1   | 23357  | 4131   | 12.22062055 | 11.92109013 | 10.94527691 | 7.154348582 |
| MAP1LC3B | 81631  | 2304   | 21.91119076 | 38.00922097 | 29.06999538 | 53.94588622 |
| COG6     | 57511  | 5257   | 9.603078468 | 7.884131513 | 8.922430478 | 8.548451127 |
| FAM8A1   | 51439  | 4762   | 10.60129851 | 6.878707404 | 12.51203333 | 31.2017609  |
| RFWD2    | 64326  | 2801   | 18.02334292 | 28.32146939 | 20.74377343 | 24.35506134 |
| ZCCHC3   | 85364  | 2773   | 18.20533123 | 23.22345687 | 19.88652099 | 15.98698918 |
| C6orf120 | 387263 | 4219   | 11.96572257 | 16.21465613 | 12.51983653 | 11.6112313  |
| SUV39H1  | 6839   | 2745   | 18.39103224 | 14.28726868 | 15.00929999 | 7.30071309  |
| MAP2K3   | 5606   | 2319   | 21.76946249 | 27.19346692 | 21.22869745 | 17.8947464  |
| ADRBK2   | 157    | 9068   | 5.567201534 | 7.740658987 | 4.217307213 | 6.76399928  |
| CD68     | 968    | 1872   | 26.96761939 | 69.15907577 | 32.84394528 | 332.0828195 |
| ZNF117   | 51351  | 6404   | 7.883101734 | 11.34345022 | 8.479104258 | 14.47726721 |
| ZNF330   | 27309  | 1906   | 26.48656008 | 14.96462941 | 24.38753804 | 12.85094041 |
| TBXAS1   | 6916   | 2385   | 21.16703711 | 44.84682963 | 21.97007162 | 62.04423431 |
| B3GNT2   | 10678  | 2788   | 18.10738289 | 25.33642793 | 20.00687841 | 32.2375951  |
| TTN      | 7273   | 101520 | 0.497275251 | 0.913104776 | 0.514059654 | 0.498495033 |
| WEE1     | 7465   | 3374   | 14.96247288 | 16.64310508 | 13.15050382 | 4.439755738 |
| POLR2K   | 5440   | 971    | 51.99112617 | 40.38985841 | 66.36648014 | 40.65255229 |
| C17orf85 | 55421  | 3797   | 13.29559745 | 13.73264373 | 13.02097292 | 9.276434594 |
| RNF41    | 10193  | 3429   | 14.72247988 | 14.42661301 | 15.7739571  | 16.4705899  |

|          |        |       |             |             |             |             |
|----------|--------|-------|-------------|-------------|-------------|-------------|
| SLC25A32 | 81034  | 3038  | 16.61730859 | 12.17584782 | 17.52592491 | 7.795976618 |
| PITPNA   | 5306   | 3660  | 13.73743097 | 15.95141077 | 12.00743999 | 18.25178273 |
| FAM120B  | 84498  | 3261  | 15.41827579 | 18.65480617 | 14.64285681 | 15.95345531 |
| LYRM5    | 144363 | 1149  | 43.75891848 | 37.04181269 | 46.52310237 | 35.41183764 |
| RUFY1    | 80230  | 2644  | 19.01626223 | 20.05831277 | 21.0166007  | 15.84825062 |
| NACC2    | 138151 | 6899  | 7.287867421 | 3.585219308 | 7.564478338 | 2.112607354 |
| ERAP1    | 51752  | 5584  | 9.004118435 | 17.99741061 | 9.308032109 | 20.01087614 |
| WDFY2    | 115825 | 3809  | 13.20005181 | 11.17381013 | 11.59320429 | 6.111661654 |
| RNF187   | 149603 | 3133  | 16.04819577 | 16.28748318 | 20.29898282 | 16.60524027 |
| COMMD6   | 170622 | 1722  | 29.19802401 | 32.35085435 | 30.42893195 | 19.39649384 |
| LIMK1    | 3984   | 3398  | 14.7966443  | 40.13349119 | 18.03195432 | 61.71756975 |
| PPIL4    | 85313  | 2481  | 20.18323707 | 17.60387191 | 22.73802148 | 14.36012893 |
| CASP4    | 837    | 1352  | 37.0374343  | 52.4118297  | 29.53610939 | 93.27898049 |
| KLHL15   | 80311  | 6290  | 7.960987468 | 7.935535991 | 5.844761284 | 8.528402016 |
| ULK3     | 25989  | 2635  | 19.0036475  | 15.6447995  | 20.44691239 | 11.0625261  |
| NOMO1    | 23420  | 4261  | 11.75184491 | 8.367338549 | 9.123772845 | 9.12141321  |
| VPS11    | 55823  | 3279  | 15.27130563 | 19.70767874 | 17.26877586 | 22.16284288 |
| CHPF     | 79586  | 3013  | 16.61951914 | 18.56322731 | 16.2688565  | 15.2510295  |
| LIN54    | 132660 | 6127  | 8.17277806  | 5.491714607 | 7.069263274 | 6.772958529 |
| INTS7    | 25896  | 4589  | 10.91187866 | 10.43997107 | 12.10893272 | 9.572251746 |
| ADNP2    | 22850  | 5401  | 9.271359224 | 7.261350216 | 9.584293008 | 7.383537493 |
| SPATS2L  | 26010  | 6335  | 7.904437438 | 3.623009712 | 6.403579192 | 26.90530428 |
| SOCS4    | 122809 | 7029  | 7.124002158 | 7.862072246 | 9.047761157 | 7.77575658  |
| FAM129B  | 64855  | 4007  | 12.49678342 | 2.391266644 | 15.29138527 | 3.233203701 |
| FAM98B   | 283742 | 1556  | 32.18162672 | 20.04921328 | 29.87316677 | 8.716409909 |
| WRN      | 7486   | 5765  | 8.68596898  | 6.416344435 | 7.659759779 | 2.809073554 |
| MTRNR2L1 | 1E+08  | 1121  | 44.6695907  | 57.44749856 | 35.24554003 | 42.97776038 |
| TELO2    | 9894   | 3338  | 15.00138142 | 11.54884795 | 10.44397412 | 4.85150061  |
| RTCD1    | 8634   | 2634  | 19.01086225 | 18.69628828 | 19.9733886  | 18.98250917 |
| C11orf73 | 51501  | 1187  | 42.01366892 | 41.30007636 | 46.10172973 | 28.30934393 |
| NQO1     | 1728   | 2601  | 19.17348135 | 3.683892904 | 17.05874659 | 8.094041425 |
| HMG20B   | 10362  | 1584  | 31.48372791 | 25.46257319 | 25.87704779 | 22.23650389 |
| NCOA5    | 57727  | 3209  | 15.54073699 | 16.04062019 | 17.51378826 | 10.97619886 |
| GSR      | 2936   | 3174  | 15.71210618 | 22.67642003 | 16.57526956 | 19.77093495 |
| CRNKL1   | 51340  | 4406  | 11.31870744 | 10.97473731 | 11.41302161 | 9.510389158 |
| SLC44A1  | 23446  | 4540  | 10.98463106 | 74.75202178 | 10.70385355 | 59.21267181 |
| PPP6R2   | 9701   | 4004  | 12.45510115 | 12.24355411 | 11.97843178 | 11.83025822 |
| POLRMT   | 5442   | 3800  | 13.12374342 | 7.975064507 | 10.39743431 | 3.782223492 |
| COPS5    | 10987  | 1510  | 33.02663907 | 39.40154094 | 46.1748154  | 37.67053675 |
| FAM193B  | 54540  | 4620  | 10.794421   | 8.151238901 | 7.911745393 | 6.616181452 |
| FOXP4    | 116113 | 5965  | 8.360473596 | 8.069046086 | 6.552838366 | 5.837009963 |
| BCL2     | 596    | 6492  | 7.681796827 | 1.064050097 | 7.029807217 | 0.31181279  |
| MACC1    | 346389 | 9167  | 5.440190357 | 7.900144272 | 8.089991408 | 19.41038186 |
| NEK2     | 4751   | 2161  | 22.98280372 | 20.21064609 | 15.54570896 | 6.744506309 |
| LEMD3    | 23592  | 4798  | 10.35136283 | 12.49312051 | 10.21635361 | 16.41201077 |
| FAM126B  | 285172 | 9348  | 5.312990889 | 6.102392736 | 7.594317482 | 8.59694679  |
| GEMIN4   | 50628  | 3757  | 13.2195472  | 12.39606897 | 12.7097035  | 4.256555809 |
| VPS72    | 6944   | 1324  | 37.51196287 | 31.80919744 | 38.45893315 | 25.07427003 |
| PARP2    | 10038  | 1904  | 26.08499939 | 21.88535297 | 22.41571523 | 11.48230945 |
| DNHD1    | 144132 | 14882 | 3.337309423 | 3.204286691 | 2.399349864 | 3.033304424 |
| PARP6    | 56965  | 2631  | 18.87717173 | 17.87065621 | 21.2810573  | 22.23562957 |
| NUP37    | 79023  | 1228  | 40.27805592 | 33.38861074 | 42.49783066 | 15.00083594 |
| FTSJ2    | 29960  | 1605  | 30.81710447 | 27.21196649 | 33.43696535 | 14.25200094 |
| MICAL3   | 57553  | 9471  | 5.222410798 | 3.035098335 | 4.751732042 | 1.838125036 |
| CCDC88B  | 283234 | 4932  | 10.02868059 | 58.59975509 | 15.25088707 | 69.73370603 |
| ASAP1    | 50807  | 6042  | 8.186271544 | 9.293915352 | 16.54049853 | 18.32647932 |
| ARMC6    | 93436  | 2505  | 19.74509088 | 16.27879493 | 20.9176131  | 5.333455072 |
| SOCS7    | 30837  | 7978  | 6.199730843 | 4.161703438 | 5.640969437 | 2.080617544 |
| TMUB1    | 83590  | 1810  | 27.32676943 | 26.71529977 | 27.89892705 | 28.29530515 |
| FPGS     | 2356   | 2487  | 19.88799866 | 22.93734109 | 22.2583866  | 16.11617003 |
| AIMP2    | 7965   | 1236  | 40.01735653 | 26.8625162  | 37.09449289 | 10.48175342 |
| SLC30A7  | 148867 | 8232  | 6.008436913 | 6.956754128 | 6.236904399 | 7.844364344 |

|          |        |       |             |             |             |             |
|----------|--------|-------|-------------|-------------|-------------|-------------|
| MRPL15   | 29088  | 1749  | 28.27984715 | 25.35374743 | 33.22087443 | 10.99527843 |
| NUP85    | 79902  | 2311  | 21.40261907 | 16.29542351 | 22.2164418  | 7.620645209 |
| GGA1     | 26088  | 3231  | 15.3084038  | 20.69012857 | 16.28285533 | 11.7785906  |
| MOV10    | 4343   | 3653  | 13.48400397 | 21.89896902 | 9.716901152 | 91.87710232 |
| ANKRD20A | 284232 | 37567 | 1.311179133 | 1.583739101 | 1.259823423 | 1.659650486 |
| TUBA4A   | 7277   | 1514  | 32.53439003 | 72.70762633 | 34.74894688 | 32.75764295 |
| STAG3L1  | 54441  | 1826  | 26.97539239 | 39.05063478 | 23.25752302 | 22.28269521 |
| ZNF398   | 57541  | 5508  | 8.942822531 | 7.52485101  | 8.937790377 | 2.976895043 |
| RMI1     | 80010  | 3508  | 14.04135305 | 12.64073668 | 16.9244635  | 7.213115128 |
| ANAPC13  | 25847  | 1859  | 26.49653927 | 24.33299355 | 22.04908214 | 18.83818897 |
| KBTBD11  | 9920   | 6717  | 7.333194357 | 10.48312169 | 6.165224539 | 1.446566238 |
| HEATR5B  | 54497  | 6792  | 7.252218271 | 8.464492442 | 7.310353198 | 7.212571383 |
| ACVR1B   | 91     | 4687  | 10.50929518 | 5.562497144 | 10.68369713 | 14.94354312 |
| CEP135   | 9662   | 5687  | 8.661344557 | 6.778627477 | 8.953688674 | 4.769732308 |
| PIGU     | 128869 | 1833  | 26.8723767  | 27.59575528 | 22.01603351 | 11.81663303 |
| FBXO34   | 55030  | 3468  | 14.20330637 | 12.46526552 | 15.35287193 | 15.46818013 |
| C12orf52 | 84934  | 1775  | 27.75046    | 22.97373595 | 28.56808041 | 10.03590983 |
| RARA     | 5914   | 3494  | 14.09761491 | 15.49752215 | 15.35956765 | 31.05376947 |
| PCCA     | 5095   | 2577  | 19.11411195 | 12.10577255 | 18.28346984 | 9.819017411 |
| PFDN2    | 5202   | 668   | 73.7381235  | 48.70295205 | 68.31962343 | 36.06142918 |
| PAPSS1   | 9061   | 2558  | 19.17618465 | 17.68375098 | 20.15382399 | 22.55364579 |
| CBX6     | 23466  | 3284  | 14.93686977 | 10.11025275 | 8.299553659 | 17.32110551 |
| PDE3B    | 5140   | 6091  | 8.05330493  | 1.536524833 | 8.70669432  | 3.423111621 |
| C8orf59  | 401466 | 1050  | 46.71683841 | 43.50542893 | 49.70222482 | 26.41214688 |
| RAB2A    | 5862   | 1148  | 42.72881562 | 37.85049959 | 36.80919187 | 48.31490283 |
| UBAC1    | 10422  | 1877  | 26.13355372 | 35.8526749  | 34.10723638 | 19.95169933 |
| BCL11A   | 53335  | 5946  | 8.249693967 | 1.648946877 | 5.365623775 | 0.272356358 |
| KIAA1191 | 57179  | 2852  | 17.19939703 | 18.59543442 | 16.07601445 | 19.37695638 |
| MYO18A   | 399687 | 7591  | 6.461952355 | 9.305488218 | 8.294409022 | 10.21344415 |
| SMURF1   | 57154  | 5781  | 8.485154875 | 7.709139759 | 8.113685698 | 10.18972481 |
| CDK6     | 1021   | 11733 | 4.180744936 | 4.368151154 | 4.79005766  | 1.690789105 |
| ZNF160   | 90338  | 4336  | 11.31288753 | 9.918521253 | 11.88964063 | 13.44545953 |
| IRF3     | 3661   | 1684  | 29.00730057 | 37.4475355  | 29.48451242 | 26.56578308 |
| FAM40A   | 85369  | 3290  | 14.84750582 | 11.51415088 | 13.29360049 | 10.45985006 |
| KIAA1704 | 55425  | 1431  | 34.1357751  | 23.51344193 | 33.22087443 | 14.57035142 |
| WDFY3    | 23001  | 14329 | 3.409051166 | 3.25019409  | 2.315005062 | 8.659982762 |
| TDP2     | 51567  | 1940  | 25.17953307 | 30.78307191 | 29.51452079 | 41.32053079 |
| CRLS1    | 54675  | 3968  | 12.310558   | 9.097503762 | 15.38843146 | 6.22387129  |
| PRSS12   | 8492   | 4573  | 10.68189245 | 4.385510961 | 6.560777632 | 0.708257557 |
| ESCO1    | 114799 | 4499  | 10.85758928 | 10.05446433 | 11.55280091 | 14.75809448 |
| CXXC1    | 30827  | 2976  | 16.41407734 | 13.47778335 | 15.47717674 | 8.774638213 |
| WDR60    | 55112  | 3789  | 12.89213359 | 9.056804817 | 15.55778528 | 5.128838966 |
| LEMD2    | 221496 | 2957  | 16.51954486 | 18.99013749 | 14.5048382  | 18.48352824 |
| RALGDS   | 5900   | 3668  | 13.31741935 | 11.05658359 | 11.92364929 | 8.333358317 |
| SEC22B   | 9554   | 1821  | 26.82498307 | 30.46970813 | 28.42656042 | 46.24404557 |
| C12orf48 | 55010  | 3081  | 15.85468814 | 15.40518074 | 18.1042444  | 6.898744112 |
| FBXO22   | 26263  | 3497  | 13.91018244 | 10.51398141 | 14.31927036 | 8.046214455 |
| STAT5A   | 6776   | 4314  | 11.27582476 | 6.611632742 | 12.92980459 | 11.40246029 |
| ESRRA    | 2101   | 2221  | 21.90180459 | 41.3359145  | 22.83131145 | 45.20698605 |
| VPS4B    | 9525   | 3396  | 14.32388339 | 12.66393055 | 15.36729566 | 17.7035843  |
| EFR3A    | 23167  | 5430  | 8.95836243  | 15.84040816 | 10.27240829 | 28.70538204 |
| KDM6A    | 7403   | 5778  | 8.418814122 | 9.718559459 | 7.386556212 | 16.32603845 |
| CD2BP2   | 10421  | 3513  | 13.84682835 | 19.21955692 | 14.67505886 | 21.60854643 |
| OBSL1    | 23363  | 6118  | 7.950949329 | 10.45324951 | 5.698265058 | 4.43371488  |
| IMP4     | 92856  | 1074  | 45.29227932 | 33.19667557 | 43.47665946 | 14.51305628 |
| NUDT15   | 55270  | 2022  | 24.05732344 | 19.28571703 | 24.66033812 | 9.110299965 |
| SLC24A6  | 80024  | 2993  | 16.25255863 | 37.22564062 | 18.14239347 | 31.44985676 |
| NDST1    | 3340   | 8030  | 6.057771855 | 10.29525854 | 5.893871301 | 13.18434562 |
| ACO1     | 48     | 3561  | 13.66018197 | 10.51274671 | 11.62926516 | 8.470064752 |
| SUPT4H1  | 6827   | 1499  | 32.31455759 | 37.46086495 | 35.66047006 | 35.78628998 |
| ST3GAL6  | 10402  | 2107  | 22.98980628 | 4.547605811 | 22.96355498 | 26.13224999 |
| PLD6     | 201164 | 2591  | 18.69529982 | 6.278188339 | 15.57521784 | 2.031320122 |

|           |        |      |             |             |             |             |
|-----------|--------|------|-------------|-------------|-------------|-------------|
| C20orf177 | 63939  | 5119 | 9.462692289 | 9.750834417 | 10.11228102 | 5.615334741 |
| EPS15L1   | 58513  | 2774 | 17.46197615 | 16.38711885 | 21.5550063  | 13.71904334 |
| ZMAT2     | 153527 | 1512 | 32.03672078 | 35.81239576 | 35.07438829 | 31.8638025  |
| METTL13   | 51603  | 3421 | 14.15946268 | 12.83193186 | 16.05788891 | 8.224966954 |
| VCCIP1    | 80124  | 8176 | 5.924599049 | 6.595585825 | 5.297624276 | 15.42480206 |
| ELMO2     | 63916  | 3683 | 13.15219164 | 11.25356486 | 11.07194107 | 20.06150828 |
| MRPS31    | 10240  | 1344 | 36.04131088 | 29.84366314 | 31.75559657 | 28.61717557 |
| MMP9      | 4318   | 2387 | 20.29305481 | 1.960404851 | 41.24788387 | 5.173087826 |
| SEPSECS   | 51091  | 5645 | 8.580960465 | 7.263279715 | 7.074015925 | 6.634072568 |
| BRP44L    | 51660  | 962  | 50.35293329 | 52.34946648 | 59.95918903 | 25.0405766  |
| SCO1      | 6341   | 1768 | 27.39791959 | 22.43451238 | 25.09604066 | 15.80044292 |
| PPIH      | 10465  | 813  | 59.58120766 | 59.7509536  | 88.10028795 | 27.13990906 |
| SPTSSA    | 171546 | 2538 | 19.00517559 | 14.22336286 | 22.31060522 | 12.36267682 |
| DNAJC14   | 85406  | 3330 | 14.48502572 | 15.65851298 | 15.60842381 | 13.73841532 |
| SYNGAP1   | 8831   | 6011 | 8.024477734 | 6.487393084 | 7.20568559  | 4.512638103 |
| EAF1      | 85403  | 4503 | 10.71177785 | 12.61877295 | 10.65104171 | 19.42022403 |
| MAR5      | 54708  | 3941 | 12.23931379 | 10.96918062 | 11.25851304 | 11.35163124 |
| TBC1D23   | 55773  | 3912 | 12.3300449  | 14.24033006 | 14.7445654  | 24.5791692  |
| TMTC2     | 160335 | 4855 | 9.935146377 | 3.901293142 | 9.095471704 | 6.546103292 |
| CDAN1     | 146059 | 4757 | 10.13982251 | 8.103858411 | 7.639474239 | 3.829850256 |
| CWC25     | 54883  | 2347 | 20.55182602 | 13.76682543 | 18.63482983 | 12.85125717 |
| DERL1     | 79139  | 3179 | 15.17305305 | 16.96304175 | 13.89069365 | 24.13354484 |
| SPPL3     | 121665 | 3432 | 14.05452671 | 17.7253272  | 13.05138969 | 20.76193466 |
| COG3      | 83548  | 4601 | 10.48362001 | 11.47823219 | 11.70997917 | 14.82689129 |
| PHAX      | 51808  | 3641 | 13.2477714  | 12.17899046 | 15.49382897 | 9.507095733 |
| CHMP1A    | 5119   | 2373 | 20.24051812 | 23.66364794 | 22.88250471 | 23.80010652 |
| MEAF6     | 64769  | 2166 | 22.17486126 | 21.5013994  | 25.55706716 | 15.70085364 |
| PHC2      | 1912   | 3873 | 12.40143287 | 17.20293642 | 13.74742057 | 57.33655116 |
| CDC40     | 51362  | 3866 | 12.42388761 | 12.79587584 | 12.5699677  | 15.91784127 |
| ANKRD36   | 375248 | 6269 | 7.661628568 | 6.718037552 | 6.133964997 | 2.712398228 |
| PPM1F     | 9647   | 5199 | 9.238459221 | 8.486414999 | 9.387724538 | 5.022758862 |
| PSMB8     | 5696   | 1602 | 29.98174125 | 58.55965061 | 28.61972111 | 100.0771907 |
| PPA2      | 27068  | 1682 | 28.55573691 | 31.0005043  | 31.90626004 | 14.56236172 |
| DBF4B     | 80174  | 3423 | 14.03177023 | 11.39226405 | 11.04877952 | 9.876021067 |
| NEDD8     | 4738   | 625  | 76.84919918 | 79.86323421 | 80.11918151 | 50.20235801 |
| B4GALT3   | 8703   | 2438 | 19.70088166 | 17.09176048 | 21.23247192 | 14.28128155 |
| FAM65A    | 79567  | 4249 | 11.30401259 | 15.837955   | 9.298717433 | 11.76745803 |
| MKL1      | 57591  | 4507 | 10.65692245 | 18.58999101 | 15.75142663 | 35.52723111 |
| SAR1B     | 51128  | 6651 | 7.190853003 | 5.7291218   | 8.100678717 | 7.030682205 |
| NFYC      | 4802   | 2380 | 20.09511064 | 22.28326847 | 19.79684949 | 19.13718242 |
| PKN2      | 5586   | 6104 | 7.835249561 | 10.51373087 | 9.345820047 | 13.86226486 |
| THADA     | 63892  | 6346 | 7.536458135 | 6.671637268 | 8.423423357 | 3.189865474 |
| CEP68     | 23177  | 5877 | 8.137887242 | 2.805788442 | 7.262127241 | 1.79110105  |
| LOC100495 | 1E+08  | 2318 | 20.6325985  | 20.09147158 | 18.04761982 | 22.26892151 |
| C20orf20  | 55257  | 1659 | 28.82842877 | 25.78895447 | 28.65525697 | 18.42480911 |
| FAM54B    | 56181  | 2120 | 22.55960534 | 29.85117097 | 21.02881351 | 17.66478285 |
| WDR59     | 79726  | 3678 | 13.00336143 | 6.664381545 | 10.45509151 | 6.274304072 |
| TMEM57    | 55219  | 3940 | 12.13867089 | 23.01850322 | 12.9773889  | 26.71649968 |
| RIN1      | 9610   | 2698 | 17.72659871 | 13.13209669 | 16.52375265 | 24.75964595 |
| BTRC      | 8945   | 6146 | 7.781705715 | 5.764789599 | 7.322429901 | 5.467489627 |
| MIER3     | 166968 | 5220 | 9.162138567 | 8.836468533 | 10.199954   | 8.996838354 |
| RAC3      | 5881   | 1077 | 44.40702258 | 19.44872086 | 31.97717373 | 3.007299728 |
| LSM2      | 57819  | 907  | 52.7302793  | 51.59301411 | 51.48173347 | 26.55902392 |
| DCLRE1A   | 9937   | 4468 | 10.70419949 | 11.37105016 | 12.38957195 | 9.197193192 |
| ENY2      | 56943  | 2993 | 15.91111833 | 16.37928187 | 17.78942862 | 21.03420527 |
| ZFYVE27   | 118813 | 3059 | 15.56782516 | 13.69484954 | 14.78095421 | 17.20546073 |
| KLHL18    | 23276  | 4743 | 10.04047589 | 6.765318702 | 8.597503467 | 6.18852733  |
| DGCR2     | 9993   | 4504 | 10.57326313 | 11.42858574 | 10.69558739 | 13.97765905 |
| ITFG1     | 81533  | 2261 | 21.06235168 | 21.87919328 | 23.73566094 | 28.82887832 |
| EIF2C4    | 192670 | 7069 | 6.736734638 | 7.344746859 | 7.412451665 | 9.4499257   |
| ELF2      | 1998   | 3218 | 14.79862559 | 18.0731295  | 16.34863442 | 16.98439807 |
| DTYMK     | 1841   | 1227 | 38.81171732 | 25.4250822  | 31.68410439 | 6.929105333 |



|           |        |       |             |             |             |             |
|-----------|--------|-------|-------------|-------------|-------------|-------------|
| RAB21     | 23011  | 2627  | 18.12789385 | 15.94691463 | 23.56544921 | 22.26948664 |
| H6PD      | 9563   | 9117  | 5.223426254 | 13.19838212 | 4.936234964 | 7.304935386 |
| APOBR     | 55911  | 3733  | 12.75702576 | 30.14479127 | 22.86607115 | 112.1953703 |
| MAN2B2    | 23324  | 4242  | 11.22630296 | 23.37589456 | 16.23734847 | 29.92053208 |
| MRPL28    | 10573  | 1161  | 41.01806818 | 37.61861    | 42.22055524 | 33.82532249 |
| CHST14    | 113189 | 2213  | 21.51919438 | 18.32604999 | 19.57224405 | 9.51315036  |
| C14orf135 | 64430  | 3952  | 12.05009543 | 11.4461121  | 11.38756431 | 5.992959759 |
| PIK3R4    | 30849  | 5078  | 9.378097116 | 8.469221771 | 12.02467429 | 6.816726185 |
| NOL9      | 79707  | 6728  | 7.047798898 | 7.05460194  | 7.756738415 | 3.640590431 |
| AP2A2     | 161    | 4616  | 10.27244172 | 11.92367269 | 11.62615455 | 10.74416625 |
| HIBADH    | 11112  | 2012  | 23.56739115 | 26.80194319 | 22.78767058 | 15.59466887 |
| MRPS18B   | 28973  | 1536  | 30.87082746 | 32.20628647 | 33.5634647  | 17.26444079 |
| EIF4E2    | 9470   | 1014  | 46.76291024 | 52.52170774 | 57.30109406 | 51.90483666 |
| RBBP5     | 5929   | 4423  | 10.72068528 | 8.967718265 | 12.08569854 | 9.611137513 |
| SPRED1    | 161742 | 7255  | 6.535849895 | 3.440008365 | 6.406981047 | 3.292433608 |
| CD2AP     | 23607  | 5425  | 8.740569767 | 10.67953881 | 10.32082244 | 28.17212747 |
| C1orf9    | 51430  | 5669  | 8.364366023 | 12.85346409 | 9.764792287 | 13.03343358 |
| MEA1      | 4201   | 868   | 54.62856104 | 52.88425467 | 52.82119034 | 38.71335398 |
| DHX32     | 55760  | 3070  | 15.44546938 | 10.88759046 | 15.8291515  | 8.70378173  |
| MNAT1     | 4331   | 1397  | 33.94244165 | 22.17161287 | 37.20547695 | 20.43125961 |
| STK38     | 11329  | 3593  | 13.1972143  | 12.52774904 | 11.29047431 | 15.32442269 |
| NEK7      | 140609 | 4134  | 11.4701478  | 15.36219525 | 10.68178885 | 19.97846543 |
| BRD1      | 23774  | 4617  | 10.2702168  | 8.880488194 | 9.335519021 | 6.532791982 |
| GLT8D1    | 55830  | 2347  | 20.11640597 | 12.72244557 | 19.80513315 | 6.813753802 |
| SNX4      | 8723   | 2567  | 18.3923665  | 17.01410448 | 19.01315928 | 18.37394822 |
| PRPF31    | 26121  | 2201  | 21.45079728 | 18.8309311  | 22.75078984 | 7.817561722 |
| DDX51     | 317781 | 4738  | 9.964796289 | 7.195736759 | 9.632230573 | 2.819819535 |
| CEP63     | 80254  | 6054  | 7.798679355 | 6.772582424 | 8.410906424 | 7.088688296 |
| TFAP4     | 7023   | 2147  | 21.99031431 | 12.35076362 | 17.61526422 | 2.451397502 |
| EHBP1L1   | 254102 | 5197  | 9.08470364  | 19.55199235 | 11.05819802 | 24.81185024 |
| FAM100B   | 283991 | 1604  | 29.43466635 | 34.59185692 | 20.41716834 | 56.41253226 |
| CC2D1A    | 54862  | 3644  | 12.95642284 | 18.10056934 | 12.63997749 | 18.88743507 |
| FLJ14186  | 401149 | 4818  | 9.799336824 | 5.365004448 | 7.323485917 | 7.352646537 |
| NFKBIA    | 4792   | 1579  | 29.90069969 | 75.50062466 | 29.83945648 | 77.30500593 |
| C15orf17  | 57184  | 3563  | 13.25096964 | 9.005867697 | 11.56343768 | 7.783540338 |
| PTPMT1    | 114971 | 2651  | 17.80958311 | 15.46631988 | 17.69340514 | 7.025068047 |
| UTP3      | 57050  | 2088  | 22.61168813 | 21.34412689 | 23.37489458 | 18.32330225 |
| AMPD3     | 272    | 4473  | 10.55515422 | 21.62069868 | 13.46214107 | 16.24680568 |
| EZH1      | 2145   | 4654  | 10.10073456 | 7.2298529   | 9.98767673  | 8.438160596 |
| GRINA     | 2907   | 1986  | 23.67010003 | 34.67034219 | 21.80935351 | 53.81794544 |
| SLC35F5   | 80255  | 2875  | 16.35089344 | 17.12905159 | 17.34372302 | 15.84225884 |
| CUTC      | 51076  | 1378  | 34.11380163 | 18.91975625 | 29.43880565 | 9.548531271 |
| ZHX1      | 11244  | 5234  | 8.981432681 | 8.301943738 | 9.082741939 | 7.657798025 |
| EIF2D     | 1939   | 2115  | 22.2263918  | 19.49127502 | 19.87974823 | 6.412640103 |
| SIPA1L3   | 23094  | 7984  | 5.887878087 | 3.600377797 | 4.048918899 | 4.335588122 |
| SDCCAG3   | 10807  | 2390  | 19.66896178 | 12.68001888 | 21.57049447 | 3.811422106 |
| ZNF687    | 57592  | 4598  | 10.22375351 | 16.13816529 | 9.695755687 | 19.81143722 |
| ACCN2     | 41     | 3923  | 11.98287501 | 1.022428836 | 6.139806983 | 0.361203681 |
| SBF2      | 81846  | 7447  | 6.31245047  | 5.505735731 | 4.76646165  | 14.10777224 |
| TRIOBP    | 11078  | 10159 | 4.607188944 | 3.114700387 | 3.327646601 | 3.188169906 |
| HSF2      | 3298   | 2697  | 17.3542575  | 11.64976216 | 14.49302219 | 8.406389563 |
| CBFA2T2   | 9139   | 7737  | 6.04942904  | 6.480206032 | 5.379746412 | 7.822958514 |
| SH3BP1    | 23616  | 2592  | 18.05726562 | 55.96607939 | 24.20971224 | 75.59843339 |
| XRCC1     | 7515   | 2102  | 22.26661869 | 17.70364336 | 20.80682474 | 9.341389014 |
| XRCC3     | 7517   | 2657  | 17.61551844 | 18.03124848 | 15.665449   | 9.371001183 |
| CDK7      | 1022   | 1534  | 30.51136407 | 27.59987621 | 34.84683483 | 23.88502229 |
| ARFIP2    | 23647  | 2596  | 18.0294424  | 16.56652857 | 20.34714574 | 11.30669689 |
| ERI1      | 90459  | 4615  | 10.14180552 | 7.870363513 | 10.62146579 | 7.895383604 |
| KIFC3     | 3801   | 3411  | 13.72161609 | 3.527694218 | 12.51231949 | 3.501408066 |
| SLX4      | 84464  | 7304  | 6.40805483  | 6.925386013 | 5.75652622  | 5.459814622 |
| NANS      | 54187  | 1257  | 37.23502982 | 43.07744025 | 38.49181412 | 30.43679801 |
| QTRTD1    | 79691  | 4008  | 11.67775262 | 13.23208058 | 10.80673056 | 8.63656077  |

|          |        |      |             |             |             |             |
|----------|--------|------|-------------|-------------|-------------|-------------|
| CPOX     | 1371   | 2728 | 17.15705003 | 10.45549254 | 16.65184153 | 6.826779836 |
| PRMT2    | 3275   | 2249 | 20.81121942 | 18.52810673 | 19.82262545 | 19.71183681 |
| DHTKD1   | 55526  | 5202 | 8.997391865 | 5.911363032 | 8.529373296 | 5.370085176 |
| CNTLN    | 54875  | 5522 | 8.475992844 | 10.89547716 | 6.389814406 | 7.991577712 |
| MRPS7    | 51081  | 1432 | 32.54193178 | 28.47652326 | 35.26330864 | 16.11514691 |
| MAGED2   | 10916  | 2174 | 21.4351639  | 18.96230298 | 19.82616896 | 19.74007311 |
| MRPL52   | 122704 | 1306 | 35.6815056  | 22.01027284 | 41.09213582 | 18.75489465 |
| NOP16    | 51491  | 537  | 86.77848476 | 54.35955624 | 92.06822003 | 18.84812504 |
| TMX3     | 54495  | 4767 | 9.775549888 | 10.93829415 | 10.10550149 | 8.407995566 |
| CEP104   | 9731   | 6458 | 7.215863474 | 6.797466537 | 6.968667416 | 6.363124679 |
| MRPL43   | 84545  | 2151 | 21.6643637  | 17.71473226 | 20.43106944 | 9.787355531 |
| DDX19A   | 55308  | 2918 | 15.96985823 | 13.21112216 | 16.65369949 | 6.937246846 |
| SIRT1    | 23411  | 4110 | 11.33821078 | 9.975964475 | 13.05750107 | 8.323717236 |
| KRTCAP2  | 200185 | 577  | 80.76264526 | 90.75507957 | 77.62975634 | 119.2821723 |
| SNAPC4   | 6621   | 4661 | 9.997864474 | 9.322543129 | 8.9754093   | 4.256174334 |
| IFT122   | 55764  | 4182 | 11.14300486 | 8.951671697 | 8.841423539 | 1.645763113 |
| MAP3K4   | 4216   | 5501 | 8.471195476 | 8.061026043 | 8.872346823 | 4.195035517 |
| CDCA4    | 55038  | 2453 | 18.91384433 | 16.26051797 | 18.60477312 | 7.262021989 |
| UCHL3    | 7347   | 899  | 51.6080758  | 62.71042185 | 52.64492385 | 32.42464546 |
| BECN1    | 8678   | 2143 | 21.64986474 | 23.49985383 | 17.64814386 | 25.59879695 |
| GAPT     | 202309 | 2216 | 20.93666974 | 86.37783222 | 35.18234519 | 166.5287984 |
| ZNF195   | 7748   | 2405 | 19.29133478 | 23.34878859 | 20.82099312 | 17.2548511  |
| CORO2A   | 7464   | 5657 | 8.201460164 | 13.55037008 | 12.21320788 | 10.98562152 |
| LRRC40   | 55631  | 2958 | 15.68480735 | 11.82715737 | 16.57135383 | 8.896467946 |
| CWC27    | 10283  | 2093 | 22.1670617  | 23.95477977 | 20.99724337 | 11.50933335 |
| EIF2B4   | 8890   | 1763 | 26.31631319 | 16.93680077 | 26.4854976  | 10.10422005 |
| PDXDC2P  | 283970 | 4298 | 10.74715542 | 7.880541666 | 7.078875206 | 6.499577266 |
| FLJ42627 | 645644 | 7148 | 6.462125626 | 6.39069675  | 5.4978967   | 6.088724893 |
| PYGB     | 5834   | 4131 | 11.18162043 | 10.73437528 | 13.24685384 | 7.59537007  |
| GLTSCR1  | 29998  | 5741 | 8.045858557 | 7.76285263  | 8.391033895 | 10.54280265 |
| CIB1     | 10519  | 995  | 46.42339093 | 50.61325302 | 51.17550501 | 44.75814055 |
| MEMO1    | 51072  | 1831 | 25.22734789 | 25.92209822 | 31.2715294  | 16.6940242  |
| FIGNL1   | 63979  | 3544 | 13.03365519 | 13.1410923  | 14.12937033 | 4.969331568 |
| TRAPPC3  | 27095  | 1278 | 36.14340687 | 31.03616423 | 35.37945143 | 27.71913225 |
| UMPS     | 7372   | 6837 | 6.756073421 | 5.345116323 | 6.582368608 | 3.049608437 |
| HERPUD2  | 64224  | 2932 | 15.75418621 | 14.06004321 | 14.05202199 | 26.78799414 |
| IL16     | 3603   | 8322 | 5.550501559 | 5.623030978 | 6.245620199 | 5.059505347 |
| TRMT1L   | 81627  | 4421 | 10.44815064 | 10.08064622 | 10.27510149 | 14.19428806 |
| APEX2    | 27301  | 1991 | 23.20003716 | 32.12103492 | 21.43622391 | 20.33439106 |
| ALAD     | 210    | 3200 | 14.43477312 | 15.04120622 | 12.14887378 | 16.57386315 |
| COQ9     | 57017  | 1699 | 27.18733018 | 23.60793599 | 23.37936147 | 16.32298659 |
| RNF38    | 152006 | 5268 | 8.768275243 | 9.432742729 | 8.38240606  | 13.56442457 |
| DVL2     | 1856   | 3046 | 15.16456795 | 11.99755755 | 13.73420314 | 7.110928541 |
| APPBP2   | 10513  | 6468 | 7.141508036 | 6.407990006 | 6.69656402  | 10.32800321 |
| KIF3B    | 9371   | 6135 | 7.495825234 | 9.298315777 | 6.887848781 | 10.26167504 |
| MEX3C    | 51320  | 4158 | 11.05985758 | 8.306653712 | 9.603852789 | 5.063155783 |
| GPHN     | 10243  | 4318 | 10.65004349 | 6.295874835 | 9.835163741 | 3.094095636 |
| ZDHHC17  | 23390  | 4771 | 9.638836263 | 8.547135047 | 10.93844814 | 14.25615132 |
| MRPS26   | 64949  | 1062 | 43.30215425 | 24.12971633 | 36.80572585 | 7.433828301 |
| HPS5     | 11234  | 4880 | 9.423542584 | 13.01379409 | 10.91060653 | 26.58952893 |
| ACADSB   | 36     | 5941 | 7.740597174 | 8.064135199 | 8.21524657  | 5.451711509 |
| ANKS1A   | 23294  | 6355 | 7.236331677 | 7.118022817 | 6.981872523 | 8.855267333 |
| ITGA6    | 3655   | 5810 | 7.91512699  | 23.93246046 | 6.654924497 | 36.44416362 |
| UNK      | 85451  | 3865 | 11.89828921 | 11.12722074 | 9.730578919 | 11.67959546 |
| SUN1     | 23353  | 3977 | 11.56321041 | 6.779671826 | 9.881560375 | 3.512092417 |
| GLA      | 2717   | 1418 | 32.43080946 | 53.74384921 | 38.59150437 | 63.5266883  |
| NDUFA7   | 4701   | 585  | 78.61006463 | 76.56302501 | 95.34902051 | 66.09215867 |
| TRABD    | 80305  | 2315 | 19.86474635 | 24.16026085 | 20.6265037  | 17.40101241 |
| PPWD1    | 23398  | 2114 | 21.75349471 | 16.97070116 | 24.78648099 | 14.55496082 |
| NARS2    | 79731  | 2513 | 18.29959722 | 8.069150144 | 17.8242616  | 3.947080893 |
| TMEM104  | 54868  | 4763 | 9.655025784 | 17.31011828 | 10.38014574 | 12.66508527 |
| SAMM50   | 25813  | 1773 | 25.82205394 | 26.26736103 | 29.31531376 | 13.58659599 |

|           |        |       |             |             |             |             |
|-----------|--------|-------|-------------|-------------|-------------|-------------|
| PDHX      | 8050   | 2991  | 15.30675414 | 11.69666717 | 12.99779207 | 8.324557052 |
| GALM      | 130589 | 2483  | 18.43838165 | 72.06389281 | 22.03896625 | 120.1692082 |
| SLC35B1   | 10237  | 1186  | 38.60244658 | 34.75889265 | 38.30204359 | 28.84525956 |
| NT5C3L    | 115024 | 1654  | 27.67986798 | 19.93907941 | 27.59220584 | 4.8954985   |
| VPS53     | 55275  | 13106 | 3.493247493 | 3.961545517 | 3.901336201 | 4.015832776 |
| KIAA0889  | 140710 | 8036  | 5.697175416 | 4.492147204 | 4.890364063 | 3.325113229 |
| TRMT5     | 57570  | 5302  | 8.634949385 | 5.715813867 | 7.013602037 | 3.054377412 |
| PLBD2     | 196463 | 2832  | 16.16613759 | 14.79256523 | 13.20529759 | 17.79830045 |
| PSMB6     | 5694   | 849   | 53.92520806 | 39.89466205 | 51.01693296 | 27.41969286 |
| MINK1     | 50488  | 5035  | 9.092850376 | 10.04627993 | 9.189942947 | 11.21701147 |
| AP1S1     | 1174   | 1297  | 35.29876765 | 30.06609085 | 27.85635636 | 20.91400743 |
| CCBL2     | 56267  | 2165  | 21.05224733 | 17.80602977 | 15.22421375 | 16.08210828 |
| ZNHIT6    | 54680  | 6197  | 7.354867754 | 6.975882014 | 6.818936949 | 3.103234142 |
| HEXIM1    | 10614  | 4785  | 9.525206996 | 17.74279057 | 13.99733947 | 21.61779498 |
| C19orf42  | 79086  | 1390  | 32.79001113 | 31.42101166 | 30.40068509 | 24.90311911 |
| ATG5      | 9474   | 3244  | 14.04997394 | 13.46338046 | 15.9570797  | 14.16502833 |
| CLCC1     | 23155  | 4825  | 9.446241549 | 13.43923549 | 12.52382212 | 9.691412921 |
| CD53      | 963    | 1572  | 28.99371213 | 62.93747584 | 32.25721548 | 217.2375902 |
| TRIM22    | 10346  | 3111  | 14.65063178 | 23.20726128 | 7.334861532 | 196.7028135 |
| GIN54     | 84296  | 3841  | 11.86621075 | 9.804406072 | 13.86195258 | 4.690489144 |
| POLR1C    | 9533   | 1353  | 33.68670767 | 22.89264093 | 29.04579868 | 8.228815567 |
| NDUFC2    | 4718   | 2491  | 18.29711581 | 12.79208106 | 18.91469361 | 11.21444524 |
| MRPL48    | 51642  | 997   | 45.71526126 | 45.37114845 | 50.01324341 | 16.44607613 |
| STXBP3    | 6814   | 2522  | 18.07221074 | 16.43413139 | 19.43618741 | 23.43744171 |
| ZNF92     | 168374 | 3125  | 14.58499695 | 14.97435641 | 13.52222473 | 17.23074481 |
| PIGG      | 54872  | 3266  | 13.89275239 | 15.62421458 | 18.04912689 | 16.48685779 |
| MXD4      | 10608  | 3773  | 12.02590228 | 11.87102296 | 12.20781287 | 6.384583804 |
| PEX5      | 5830   | 3745  | 12.11581557 | 6.009639829 | 9.026852288 | 3.135079854 |
| TRAPPC1   | 58485  | 837   | 54.20995138 | 57.23898115 | 47.70946224 | 44.74234127 |
| SNF8      | 11267  | 1226  | 37.00956713 | 33.4430783  | 39.98210819 | 31.53663363 |
| KDSR      | 2531   | 5198  | 8.729074511 | 4.32976167  | 7.560401234 | 2.453447165 |
| C14orf119 | 55017  | 2855  | 15.8927248  | 26.22479232 | 21.09147355 | 32.19008889 |
| ORC6      | 23594  | 1703  | 26.64341122 | 23.81418005 | 25.92983859 | 11.64887174 |
| CPPED1    | 55313  | 6156  | 7.370651284 | 10.09914214 | 9.335519021 | 13.67940334 |
| PRIC285   | 85441  | 10002 | 4.536465637 | 4.344368479 | 4.203726006 | 95.85113927 |
| SLC50A1   | 55974  | 1363  | 33.28960331 | 37.60199376 | 26.81750823 | 34.01042525 |
| POLR3D    | 661    | 1946  | 23.31640766 | 15.00055586 | 18.13183718 | 8.113798207 |
| E2F1      | 1869   | 2722  | 16.59417455 | 11.87022016 | 17.85286374 | 5.800680129 |
| TMEM69    | 51249  | 1487  | 30.37615544 | 35.96492558 | 36.09033583 | 26.13741875 |
| PALB2     | 79728  | 4069  | 11.10084619 | 7.612126611 | 9.658138514 | 5.870387277 |
| GPSM3     | 63940  | 1472  | 30.68569507 | 84.92468488 | 44.49611143 | 157.7349904 |
| CD82      | 3732   | 1715  | 26.33780941 | 30.79378792 | 35.35785802 | 64.56477437 |
| GTF2H3    | 2967   | 1505  | 30.01285258 | 23.68985353 | 34.11441662 | 17.48554962 |
| POC1B     | 282809 | 3251  | 13.89398435 | 15.83338978 | 15.53277698 | 14.69492822 |
| BAG4      | 9530   | 4478  | 10.08694577 | 13.48540812 | 9.011922604 | 12.83827536 |
| TSC22D3   | 1831   | 2312  | 19.53691312 | 25.83008629 | 21.47574348 | 25.74138655 |
| ITPRIP    | 85450  | 4378  | 10.31734654 | 20.10482194 | 9.314289388 | 60.84887703 |
| SRBD1     | 55133  | 3717  | 12.15209662 | 14.86750224 | 11.19803551 | 16.5559253  |
| LNPEP     | 4012   | 4470  | 10.10499846 | 9.671038219 | 10.20973343 | 22.82419394 |
| CERS4     | 79603  | 1817  | 24.74681176 | 16.06553754 | 28.48913953 | 12.03209532 |
| RQCD1     | 9125   | 900   | 49.9610633  | 51.00392562 | 51.17786442 | 28.34004081 |
| TERF1     | 7013   | 2960  | 15.19086384 | 15.58323167 | 17.20257685 | 12.85696832 |
| ZNF511    | 118472 | 1098  | 40.95169123 | 33.68873012 | 40.79450766 | 18.06742128 |
| BRIP1     | 83990  | 8166  | 5.506362597 | 5.566723939 | 5.407606555 | 4.164590862 |
| MYH10     | 4628   | 7619  | 5.901687488 | 3.363401857 | 5.851303931 | 1.833257848 |
| AKAP8     | 10270  | 3549  | 12.66975401 | 15.57128933 | 14.34759862 | 11.92100095 |
| PIM3      | 415116 | 2410  | 18.65765849 | 20.71141966 | 14.8162343  | 26.03856743 |
| GOLPH3L   | 55204  | 3208  | 14.01650778 | 14.1006967  | 14.16029417 | 14.26088623 |
| TOP3A     | 7156   | 4116  | 10.92443075 | 11.96453434 | 12.88446917 | 11.5575274  |
| PTER      | 9317   | 3810  | 11.74818131 | 11.69725379 | 11.64561677 | 7.757116533 |
| DPY19L4   | 286148 | 6234  | 7.180072313 | 7.685118258 | 6.337864994 | 9.157032299 |
| WDFY1     | 57590  | 4607  | 9.715773996 | 9.528551963 | 10.68577152 | 34.80001291 |

|          |        |      |             |             |             |             |
|----------|--------|------|-------------|-------------|-------------|-------------|
| SMYD5    | 10322  | 2585 | 17.31550128 | 10.43046609 | 15.93830888 | 4.46361516  |
| VPS37A   | 137492 | 4585 | 9.762392759 | 8.164861731 | 11.75084278 | 11.74396457 |
| ME1      | 4199   | 3519 | 12.7196848  | 6.142304751 | 11.1676515  | 6.385224151 |
| TGFBRAP1 | 9392   | 2978 | 15.0304133  | 13.24425292 | 17.31144452 | 6.933426468 |
| YIPF6    | 286451 | 6282 | 7.125210252 | 7.519982357 | 7.567505779 | 8.507039131 |
| AMZ2     | 51321  | 1980 | 22.60634889 | 20.59514207 | 24.7565983  | 15.23328312 |
| S100PBP  | 64766  | 4317 | 10.36844355 | 12.18172657 | 13.3123593  | 6.986773357 |
| YIF1B    | 90522  | 2931 | 15.27143323 | 16.87780826 | 15.35436853 | 9.669068855 |
| PLXNA1   | 5361   | 9071 | 4.934469276 | 2.972412618 | 3.517142428 | 2.343184942 |
| AOAH     | 313    | 2559 | 17.49143056 | 20.63749366 | 17.00846457 | 25.07618193 |
| FLVCR1   | 28982  | 5947 | 7.526579923 | 11.05358029 | 6.67925595  | 8.816054398 |
| ATG2A    | 23130  | 6378 | 6.985917942 | 16.24603299 | 6.824186397 | 21.0426993  |
| ALG13    | 79868  | 4193 | 10.62632593 | 6.642996802 | 8.616669257 | 5.74505955  |
| C11orf31 | 280636 | 1294 | 34.4329093  | 46.15081879 | 40.82008527 | 40.36062337 |
| SNHG5    | 387066 | 524  | 85.03088671 | 68.04051442 | 99.19093759 | 50.22090111 |
| OAS1     | 4938   | 1673 | 26.63250725 | 16.78237793 | 17.68073317 | 802.3346027 |
| LIMD1    | 8994   | 6284 | 7.090417669 | 8.22679549  | 7.195248079 | 7.054729629 |
| FAH      | 2184   | 1810 | 24.61667659 | 29.66998731 | 19.37749745 | 14.42725045 |
| PVR      | 5817   | 5904 | 7.54677924  | 7.09562072  | 6.978409293 | 2.46864467  |
| ATXN3    | 4287   | 6982 | 6.381579008 | 6.989452586 | 6.052270449 | 6.61039541  |
| PEF1     | 553115 | 1997 | 22.31155966 | 16.62597397 | 14.28314611 | 14.19130737 |
| CENPT    | 80152  | 2360 | 18.87973925 | 13.69099122 | 20.05414684 | 5.060721574 |
| CENPA    | 1058   | 1431 | 31.13639737 | 19.62048796 | 24.50962291 | 5.799848624 |
| COL4A3BP | 10087  | 5494 | 8.109971721 | 7.544026094 | 9.422054338 | 11.27470551 |
| DNMT3B   | 1789   | 4353 | 10.23574193 | 2.457148832 | 11.60051871 | 1.999641881 |
| CUL7     | 9820   | 5527 | 8.061549599 | 9.1519847   | 6.384033861 | 8.020973582 |
| PAF1     | 54623  | 2164 | 20.58973412 | 20.69749059 | 17.1839732  | 16.65080296 |
| KLF10    | 7071   | 3249 | 13.6509075  | 20.23257679 | 13.85154022 | 21.74443619 |
| CISD1    | 55847  | 2082 | 21.30249686 | 12.62932603 | 23.64522065 | 16.23708939 |
| PNO1     | 56902  | 1994 | 22.24262711 | 15.42172041 | 27.12582694 | 7.918481099 |
| DAGLB    | 221955 | 2910 | 15.24116786 | 13.93661465 | 18.51464404 | 9.251903358 |
| LRRC8B   | 23507  | 7823 | 5.669410516 | 2.876914375 | 5.050524143 | 2.225346058 |
| CLIP2    | 7461   | 5563 | 7.972640386 | 6.248768438 | 11.5080501  | 6.877414183 |
| CRYZ     | 1429   | 2317 | 19.14190698 | 7.405315807 | 13.58715125 | 4.280972933 |
| FAM189B  | 10712  | 3209 | 13.82106527 | 8.402229621 | 12.64153137 | 4.983446611 |
| HENMT1   | 113802 | 1890 | 23.46656003 | 18.15673728 | 24.59399339 | 6.961839202 |
| PWP2     | 5822   | 3277 | 13.53426868 | 11.83182397 | 14.95821319 | 6.362579458 |
| IFIT1    | 3434   | 1876 | 23.64168362 | 11.04660964 | 18.92102341 | 1033.293599 |
| ZFYVE20  | 64145  | 6678 | 6.641479255 | 5.305540113 | 5.916479541 | 4.910673225 |
| LIMA1    | 51474  | 3748 | 11.83345743 | 10.99894522 | 9.4706083   | 12.3682523  |
| AKR1A1   | 10327  | 1597 | 27.64396512 | 24.836705   | 27.12171326 | 19.77389018 |
| KDELC1   | 79070  | 2129 | 20.73621996 | 23.65438551 | 22.52777869 | 9.41308475  |
| BIRC2    | 329    | 3753 | 11.76323269 | 14.96238651 | 11.65359595 | 28.37132478 |
| HERPUD1  | 9709   | 2198 | 20.08526492 | 13.58488615 | 22.3012123  | 15.47226978 |
| XPC      | 7508   | 3729 | 11.83894135 | 8.485449513 | 11.162      | 6.568488178 |
| DNPEP    | 23549  | 2438 | 18.10804442 | 18.64555689 | 14.64607247 | 13.94915873 |
| PYCARD   | 29108  | 782  | 56.45449143 | 100.5881556 | 51.3351722  | 124.7707314 |
| CEP95    | 90799  | 2705 | 16.32066998 | 16.55799247 | 17.65262701 | 10.32723959 |
| CSGALNAC | 55454  | 3745 | 11.73378535 | 9.222714589 | 12.97610016 | 23.2428334  |
| STYXL1   | 51657  | 1429 | 30.75089302 | 43.97397977 | 32.82380477 | 45.18880846 |
| SAMD8    | 142891 | 7009 | 6.269514357 | 7.439413358 | 3.948966149 | 16.5489711  |
| EXOSC7   | 23016  | 1246 | 35.26727619 | 25.5738956  | 36.62721385 | 9.910241284 |
| KIF24    | 347240 | 6237 | 7.045538902 | 6.823960684 | 6.063808287 | 3.018419794 |
| CHRAC1   | 54108  | 2500 | 17.57721045 | 13.63736031 | 17.57889215 | 8.663955334 |
| ZNF512B  | 57473  | 5919 | 7.424062532 | 6.399992635 | 8.174389314 | 4.069781161 |
| AARS2    | 57505  | 4782 | 9.146516094 | 10.48459934 | 9.013402618 | 5.545416363 |
| TAF1C    | 9013   | 3925 | 11.14360254 | 8.629444097 | 11.95037376 | 7.271966797 |
| CPNE2    | 221184 | 2252 | 19.42213142 | 33.74153885 | 20.26532347 | 14.83159964 |
| COX4NB   | 10328  | 1964 | 22.27018328 | 15.43036921 | 18.39597464 | 9.276271724 |
| NKAP     | 79576  | 1600 | 27.33664998 | 26.18284046 | 28.12728386 | 19.73681414 |
| ODF2L    | 57489  | 4380 | 9.985990859 | 13.58363626 | 11.38429308 | 14.55824014 |
| COX11    | 1353   | 2427 | 18.02168931 | 8.905962266 | 19.5005301  | 4.420572615 |

|           |        |       |             |             |             |             |
|-----------|--------|-------|-------------|-------------|-------------|-------------|
| STX7      | 8417   | 4270  | 10.24324121 | 10.22838553 | 9.945722959 | 17.30363817 |
| PPP1R7    | 5510   | 1299  | 33.67100844 | 46.31626242 | 34.6448454  | 33.66022663 |
| CTDP1     | 9150   | 3765  | 11.61716865 | 6.510383884 | 9.708436578 | 5.000234862 |
| WDR18     | 57418  | 1551  | 28.20028366 | 21.55054978 | 29.28834539 | 8.091933916 |
| NRM       | 11270  | 1433  | 30.52242844 | 31.72216866 | 23.88564643 | 12.28981931 |
| ZBED5     | 58486  | 2756  | 15.8703338  | 18.4346343  | 15.6393655  | 17.84840845 |
| KIF21B    | 23046  | 9895  | 4.420276904 | 18.26349746 | 5.295464459 | 25.12204585 |
| CDK17     | 5128   | 4722  | 9.262736121 | 10.85377329 | 9.664868372 | 23.23516385 |
| TMEM192   | 201931 | 4511  | 9.695996445 | 9.928922552 | 11.8499323  | 5.968308307 |
| PAQR3     | 152559 | 3739  | 11.69795131 | 8.820336278 | 11.24516382 | 4.980865309 |
| GPS2      | 2874   | 1181  | 36.86219627 | 33.96264458 | 43.11568797 | 26.73912161 |
| CD70      | 970    | 913   | 47.6826438  | 72.48774082 | 41.88668325 | 52.54725139 |
| RPUSD3    | 285367 | 1244  | 34.99538086 | 17.91259524 | 25.13677225 | 10.90251915 |
| CCDC50    | 152137 | 8949  | 4.864705978 | 4.332650256 | 6.823253552 | 4.840739376 |
| MRPL36    | 64979  | 626   | 69.54353641 | 60.86963114 | 69.52821221 | 21.34234018 |
| RNF20     | 56254  | 3970  | 10.965807   | 12.46066902 | 11.6552551  | 11.67662711 |
| IL6R      | 3570   | 5928  | 7.343834985 | 8.495308156 | 9.908428417 | 36.60656901 |
| IFNAR2    | 3455   | 2898  | 15.02217177 | 17.53134994 | 13.99816224 | 31.57275571 |
| ABI1      | 10006  | 3725  | 11.687048   | 16.8694811  | 14.57723052 | 27.98680924 |
| LEPROTL1  | 23484  | 2721  | 15.99935825 | 12.93920036 | 17.54882619 | 11.53122887 |
| PDLIM7    | 9260   | 1709  | 25.47352475 | 24.38251144 | 29.30046135 | 50.10380868 |
| MAN2A1    | 4124   | 5128  | 8.48951907  | 7.865194216 | 11.41300291 | 8.842446432 |
| PDE8A     | 5151   | 3931  | 11.0746003  | 10.54359689 | 8.223497453 | 11.32901294 |
| EPC2      | 26122  | 3641  | 11.95667503 | 14.93303353 | 11.77995236 | 17.84665339 |
| CAMLG     | 819    | 2255  | 19.30565578 | 16.30483059 | 17.33378308 | 8.079200739 |
| ATPAF1    | 64756  | 4140  | 10.51552024 | 8.773364158 | 11.1256227  | 7.578858396 |
| MMAB      | 326625 | 4241  | 10.26509167 | 13.03053662 | 8.070769003 | 4.629945698 |
| TXNL4A    | 10907  | 1415  | 30.7662571  | 26.77141795 | 33.59651682 | 16.02263792 |
| MTIF3     | 219402 | 1098  | 39.64868287 | 48.09776529 | 39.83237304 | 36.68792689 |
| EED       | 8726   | 2413  | 18.04154737 | 16.62241328 | 17.16196155 | 19.88215521 |
| KDM6B     | 23135  | 6704  | 6.463285744 | 13.36198378 | 7.248731371 | 20.44217485 |
| NDUFAF3   | 25915  | 1387  | 31.23999108 | 35.82674023 | 26.0488062  | 19.7028814  |
| SPRY2     | 10253  | 2126  | 20.38093491 | 48.73809897 | 19.27998293 | 86.17032972 |
| IKBKG     | 8517   | 2279  | 19.01266679 | 26.10633033 | 18.35646457 | 25.49235791 |
| ETS2      | 2114   | 3672  | 11.80007288 | 17.23433618 | 16.85905095 | 22.54722357 |
| PPP1R2    | 5504   | 3475  | 12.46902665 | 12.63252918 | 11.79546581 | 13.39816935 |
| CDC42BPB  | 9578   | 6701  | 6.46617932  | 5.054554258 | 7.125855256 | 5.8907071   |
| ARL2BP    | 23568  | 2100  | 20.6332703  | 18.14494719 | 26.56151286 | 15.13396737 |
| VTI1B     | 10490  | 1357  | 31.930632   | 28.57250342 | 37.05657568 | 23.12194087 |
| MTMR14    | 64419  | 2536  | 17.08590995 | 25.74525892 | 18.16249132 | 30.73151113 |
| MLLT11    | 10962  | 2180  | 19.87608607 | 10.93720058 | 14.34410306 | 9.750014041 |
| RPAP2     | 79871  | 3112  | 13.92347931 | 8.234498311 | 14.0539671  | 5.529065987 |
| ACOX1     | 51     | 7759  | 5.584465476 | 6.835182236 | 4.847104978 | 7.305075606 |
| CCNY      | 219771 | 3968  | 10.91982551 | 9.77139293  | 11.23515238 | 7.244178059 |
| MLH1      | 4292   | 2662  | 16.27718543 | 15.6535357  | 18.65211079 | 10.72218996 |
| UBE2C     | 11065  | 1490  | 29.08044807 | 26.17162405 | 22.97190023 | 11.81967186 |
| CRTC2     | 200186 | 2696  | 16.07190936 | 24.38265653 | 17.94666556 | 34.23870976 |
| TMEM127   | 55654  | 4593  | 9.433892363 | 16.15573351 | 10.53433711 | 27.72213255 |
| ZMYND19   | 116225 | 1371  | 31.60457157 | 17.06596054 | 30.20555305 | 7.087224961 |
| INTS4     | 92105  | 3163  | 13.69897807 | 12.68096214 | 14.36175267 | 12.67180362 |
| MYD88     | 4615   | 2886  | 14.94299427 | 40.6133029  | 15.15452031 | 165.1134939 |
| VPS54     | 51542  | 3994  | 10.79756671 | 13.22267058 | 13.38383691 | 16.67478616 |
| C7orf30   | 115416 | 774   | 55.7176763  | 35.69929316 | 59.50914467 | 13.86140793 |
| BET1L     | 51272  | 2971  | 14.51547676 | 18.30063113 | 16.427728   | 17.23813609 |
| RAB11FIP1 | 80223  | 7856  | 5.489496112 | 16.22457939 | 7.691884133 | 35.73941356 |
| RPIA      | 22934  | 1834  | 23.51443918 | 27.58070853 | 23.15607254 | 9.823429009 |
| MIOS      | 54468  | 3340  | 12.9118208  | 14.87775111 | 11.323345   | 11.63662925 |
| GNPTAB    | 79158  | 5644  | 7.640942852 | 11.01529395 | 10.40700986 | 9.540410621 |
| ERI2      | 112479 | 3529  | 12.22031212 | 13.32323505 | 11.55510313 | 6.195045962 |
| NCAPH2    | 29781  | 3348  | 12.88096818 | 11.11501146 | 13.44195166 | 5.320710854 |
| ENAH      | 55740  | 13172 | 3.274026834 | 1.590211993 | 3.224129747 | 1.275553874 |
| KLF6      | 1316   | 4679  | 9.21681587  | 4.238535786 | 15.44334011 | 22.88627239 |

|          |        |       |             |             |             |             |
|----------|--------|-------|-------------|-------------|-------------|-------------|
| JOSD1    | 9929   | 3435  | 12.55472532 | 7.006093145 | 11.80980326 | 10.96121354 |
| PHLDA1   | 22822  | 5913  | 7.29333358  | 10.5518606  | 10.75540558 | 39.30125734 |
| AGRN     | 375790 | 7319  | 5.89226417  | 1.91808432  | 6.004540287 | 6.803866688 |
| MTX2     | 10651  | 1603  | 26.77548053 | 23.90968295 | 28.7336731  | 17.67937668 |
| SLC44A2  | 57153  | 3434  | 12.49886293 | 6.813462987 | 18.39666385 | 29.12051785 |
| CNNM3    | 26505  | 4916  | 8.730898147 | 5.937974309 | 7.951114901 | 3.541269775 |
| SCPEP1   | 59342  | 1952  | 21.98826603 | 71.34755531 | 35.82748771 | 81.92561564 |
| UGDH     | 7358   | 3195  | 13.43383264 | 14.43704718 | 17.32601173 | 10.20064067 |
| MYO1B    | 4430   | 5113  | 8.394503284 | 1.830426904 | 5.454642773 | 1.781595704 |
| MYBBP1A  | 10514  | 4585  | 9.361198536 | 6.172246666 | 9.216347279 | 1.324507282 |
| AKIRIN2  | 55122  | 1948  | 22.03341647 | 29.28396678 | 27.00713839 | 62.66150121 |
| ARL4A    | 10124  | 3212  | 13.36273203 | 4.093128393 | 11.18256832 | 2.33183933  |
| NDUFC1   | 4717   | 1257  | 34.14566053 | 24.10918467 | 28.91088222 | 21.41848749 |
| VPS25    | 84313  | 1122  | 38.25409562 | 47.6647454  | 47.83095311 | 31.57312925 |
| TMOD2    | 29767  | 9186  | 4.672446689 | 2.741137968 | 2.001064036 | 2.29181382  |
| ASMTL    | 8623   | 2149  | 19.97258971 | 5.91040625  | 17.20559946 | 5.27501923  |
| ADARB1   | 104    | 7044  | 6.093284397 | 2.878730027 | 4.769204579 | 2.097857325 |
| FAM13B   | 51306  | 5558  | 7.722399296 | 14.35302287 | 9.807748908 | 19.66743181 |
| LCLAT1   | 253558 | 5077  | 8.454027041 | 6.715265071 | 8.697757558 | 4.585250983 |
| COPS7A   | 50813  | 2054  | 20.89634629 | 22.34836079 | 19.44148973 | 11.6293115  |
| SHPRH    | 257218 | 7345  | 5.843580026 | 6.128278056 | 5.839456304 | 3.610371824 |
| RAB28    | 9364   | 1827  | 23.49266299 | 18.41693235 | 21.39446133 | 17.3953648  |
| MRPL24   | 79590  | 935   | 45.68631992 | 40.75335732 | 44.06473633 | 11.90758017 |
| FAM55C   | 91775  | 8929  | 4.784041788 | 5.814762632 | 4.235633585 | 3.854060556 |
| QRSL1    | 55278  | 4118  | 10.3731688  | 9.199018069 | 10.72329168 | 6.685363128 |
| ARL2     | 402    | 993   | 43.01783396 | 41.51464922 | 27.66064348 | 9.785080989 |
| C10orf26 | 54838  | 4236  | 10.08420895 | 18.6219949  | 11.77129454 | 29.81954922 |
| MMP2     | 4313   | 3549  | 12.03626631 | 0.188362371 | 12.97832572 | 0.741497667 |
| STX5     | 6811   | 1794  | 23.81087465 | 25.46304369 | 27.91220092 | 26.51660133 |
| SNHG7    | 84973  | 2176  | 19.63084059 | 18.94487439 | 20.29343526 | 12.37272002 |
| DSCR3    | 10311  | 3252  | 13.13551941 | 15.28034708 | 18.06185844 | 21.35089176 |
| FAM160B1 | 57700  | 5828  | 7.329565738 | 6.691098118 | 5.800542522 | 6.877301796 |
| C7orf50  | 84310  | 1311  | 32.58330215 | 24.64587284 | 33.52191485 | 19.91862954 |
| ZNF3     | 7551   | 2837  | 15.05700004 | 13.35268114 | 17.20365875 | 10.77432439 |
| TAF10    | 6881   | 834   | 51.21907568 | 100.9961089 | 55.22791124 | 83.73855842 |
| BCL2L13  | 23786  | 3367  | 12.6868753  | 12.17737273 | 11.7345561  | 27.35525175 |
| PLEKHG3  | 26030  | 4418  | 9.668788846 | 7.212556342 | 9.182135396 | 3.757167669 |
| IRX3     | 79191  | 2308  | 18.5081062  | 8.110028387 | 17.85118218 | 1.140197235 |
| ZBTB2    | 57621  | 3105  | 13.75739424 | 8.611891198 | 11.70401899 | 7.432170814 |
| VTI1A    | 143187 | 4401  | 9.659696195 | 8.961914383 | 10.36980424 | 10.44111609 |
| DBT      | 1629   | 10831 | 3.925059824 | 3.394644353 | 3.530841271 | 3.083811503 |
| SLC39A6  | 25800  | 3637  | 11.68884326 | 10.90575141 | 12.31574633 | 6.456350867 |
| IQGAP3   | 128239 | 6069  | 7.004831595 | 7.894056223 | 5.744271812 | 4.102611657 |
| UIMC1    | 51720  | 2825  | 15.04860989 | 14.19818876 | 14.43467573 | 12.46818483 |
| SLC25A11 | 8402   | 1822  | 23.33277879 | 28.25156431 | 23.88839783 | 16.33207621 |
| NECAP2   | 55707  | 2092  | 20.32137808 | 23.32713096 | 23.22920416 | 32.80276508 |
| MATK     | 4145   | 2163  | 19.65433331 | 21.42820084 | 17.97336851 | 7.019031309 |
| JMJD6    | 23210  | 5445  | 7.807589156 | 7.284521191 | 7.877099459 | 8.736599228 |
| FADD     | 8772   | 1855  | 22.91769431 | 21.14207683 | 26.53873283 | 18.44230611 |
| RCOR3    | 55758  | 4474  | 9.502083807 | 9.712197927 | 10.53118055 | 10.54222733 |
| TMEM39A  | 55254  | 2957  | 14.37684239 | 10.17328794 | 12.50417086 | 12.11697962 |
| MRPS21   | 54460  | 945   | 44.98658514 | 34.19125851 | 48.74082326 | 17.13683496 |
| GSS      | 2937   | 1918  | 22.16492333 | 20.44762905 | 22.47241466 | 14.03703794 |
| ZFAND1   | 79752  | 2212  | 19.21895251 | 18.43507292 | 23.21075814 | 10.7986464  |
| PDXP     | 57026  | 2072  | 20.51753038 | 12.69027838 | 16.92725405 | 5.373353022 |
| TMTC4    | 84899  | 3771  | 11.21928846 | 7.327301222 | 9.076672326 | 4.294433582 |
| REXO1    | 57455  | 4581  | 9.235524293 | 9.777203587 | 8.209711312 | 9.854100947 |
| CCDC66   | 285331 | 3152  | 13.42256878 | 11.31130379 | 12.87013775 | 5.00934369  |
| GLIPR1   | 11010  | 3924  | 10.78183914 | 3.236866216 | 16.90708845 | 9.440489786 |
| ZNF335   | 63925  | 4462  | 9.481832538 | 10.98681996 | 8.807477726 | 10.47984477 |
| PTPN2    | 5771   | 3418  | 12.37798033 | 13.16916393 | 13.22847833 | 9.475897622 |
| FAM120AC | 158293 | 2779  | 15.22415861 | 14.91431427 | 19.08329439 | 18.72048139 |

|           |        |       |             |             |             |             |
|-----------|--------|-------|-------------|-------------|-------------|-------------|
| APIP      | 51074  | 1266  | 33.41859146 | 35.02662264 | 41.05533278 | 19.50736278 |
| PTPN18    | 26469  | 3686  | 11.47800781 | 20.79610514 | 15.13271215 | 11.58776182 |
| VPS37B    | 79720  | 2766  | 15.29571106 | 15.87058528 | 15.81198323 | 23.56547139 |
| AFF2      | 2334   | 13746 | 3.077836228 | 2.674770332 | 1.782993767 | 0.206169364 |
| IFNGR1    | 3459   | 2138  | 19.7885579  | 40.33500888 | 29.4494195  | 93.45055554 |
| PPIL2     | 23759  | 4128  | 10.24901569 | 12.95538865 | 10.49258141 | 9.954713949 |
| SLCO4A1   | 28231  | 2796  | 15.13159399 | 13.22969444 | 13.60202326 | 6.733148875 |
| VPS18     | 57617  | 3922  | 10.78733727 | 10.56779178 | 11.25918285 | 19.09706254 |
| TMEM179   | 374395 | 1060  | 39.91314791 | 46.45851257 | 49.43266115 | 64.73904202 |
| TCF19     | 6941   | 3306  | 12.79731905 | 14.01972124 | 13.10144467 | 6.857844117 |
| POLR3H    | 171568 | 4490  | 9.42270307  | 9.032416174 | 10.7759934  | 3.516581584 |
| CIDEB     | 27141  | 2252  | 18.78682806 | 31.267819   | 18.1074418  | 15.82037295 |
| TBC1D20   | 128637 | 4456  | 9.494599817 | 10.40152568 | 9.293494889 | 9.494531499 |
| ATP6V0A1  | 535    | 4208  | 10.05416749 | 7.996134837 | 15.11328735 | 22.12863046 |
| CSTF2     | 1478   | 2027  | 20.87219378 | 20.33746753 | 25.32915491 | 14.18100569 |
| CRTC3     | 64784  | 5171  | 8.181770796 | 4.352369205 | 9.47941687  | 9.708442857 |
| YIPF5     | 81555  | 3461  | 12.16514031 | 10.36580822 | 12.94203103 | 12.75050336 |
| GINS1     | 9837   | 3289  | 12.80132278 | 11.72090437 | 14.77515814 | 4.923778971 |
| TOR1B     | 27348  | 2774  | 15.17792019 | 24.58067827 | 15.1570539  | 147.9905314 |
| RARS2     | 57038  | 1848  | 22.78330661 | 22.18680411 | 26.29626359 | 14.4592045  |
| CLASRP    | 11129  | 2250  | 18.71268916 | 18.42083527 | 19.43819805 | 16.01437227 |
| FLOT1     | 10211  | 1839  | 22.8948073  | 122.745791  | 34.81200799 | 230.3880425 |
| TBP       | 6908   | 1921  | 21.91751724 | 16.70375149 | 21.88738548 | 9.80004386  |
| NDFIP2    | 54602  | 4666  | 9.023478486 | 12.41673768 | 15.98446652 | 18.95872548 |
| TSSC1     | 7260   | 1732  | 24.30920936 | 21.48559951 | 25.00772291 | 12.15508184 |
| ATG16L2   | 89849  | 2160  | 19.49238454 | 41.67796511 | 15.8463571  | 26.24077853 |
| NEK3      | 4752   | 2424  | 17.36945157 | 14.43264501 | 13.42320679 | 10.6893129  |
| DUS1L     | 64118  | 1885  | 22.33610112 | 19.62346189 | 42.14486487 | 19.86702369 |
| PSMD9     | 5715   | 2360  | 17.84048755 | 12.36910242 | 15.66730222 | 6.947770296 |
| BDH1      | 622    | 3546  | 11.87353373 | 13.51072398 | 11.49970641 | 6.450778769 |
| NDOR1     | 27158  | 4877  | 8.63308399  | 9.777772101 | 8.794506163 | 7.844792926 |
| ATXN1     | 6310   | 10636 | 3.958588813 | 2.40934174  | 5.641676591 | 5.919083902 |
| OTUD6B    | 51633  | 3306  | 12.73549625 | 10.24518091 | 14.95481977 | 6.857844117 |
| SH3GL1    | 6455   | 2559  | 16.45312646 | 13.58417304 | 13.0453272  | 19.93437806 |
| RAB11FIP3 | 9727   | 4273  | 9.805561537 | 6.935817241 | 8.801471454 | 4.026785245 |
| AP4E1     | 23431  | 6682  | 6.270452626 | 5.535801507 | 6.26075767  | 7.967493409 |
| LATS2     | 26524  | 5558  | 7.538532646 | 3.60830184  | 10.49201046 | 9.323819524 |
| UBXN6     | 80700  | 1933  | 21.6757188  | 25.24591721 | 17.92586698 | 24.71454302 |
| RLTPR     | 146206 | 4512  | 9.286162334 | 9.136535168 | 12.22192436 | 4.621048955 |
| RHOT2     | 89941  | 2509  | 16.69954741 | 17.85148252 | 20.12636826 | 12.26352617 |
| TRIM4     | 89122  | 3458  | 12.11658891 | 13.14571073 | 11.60905282 | 12.93718297 |
| BTN2A1    | 11120  | 3162  | 13.25084265 | 16.63140848 | 12.6289753  | 35.53068278 |
| ASB1      | 51665  | 6833  | 6.131884158 | 6.098304119 | 6.215167135 | 2.666266306 |
| AEN       | 64782  | 3134  | 13.36922924 | 8.034490547 | 14.83173181 | 4.715158582 |
| LIPA      | 3988   | 2669  | 15.69845052 | 24.5458259  | 28.73599415 | 64.54363521 |
| SLC11A2   | 4891   | 4424  | 9.47087804  | 9.267905514 | 9.217440991 | 7.778685963 |
| ZNF91     | 7644   | 5403  | 7.754796307 | 7.506116717 | 6.843389457 | 5.769765851 |
| POLR3G    | 10622  | 3285  | 12.75469237 | 4.341336933 | 12.09179152 | 1.478932332 |
| ERF       | 2077   | 2705  | 15.48952475 | 11.69768622 | 11.8725633  | 10.5517448  |
| INTS12    | 57117  | 1768  | 23.69862243 | 13.35987816 | 20.55485235 | 15.22796311 |
| CLEC16A   | 23274  | 6891  | 6.080273465 | 5.497250966 | 5.794923799 | 6.110173196 |
| SAAL1     | 113174 | 1545  | 27.11920029 | 20.04773021 | 27.62428595 | 6.944161642 |
| CCNT1     | 904    | 2568  | 16.23628438 | 15.44556771 | 16.86657947 | 14.03128411 |
| RAI1      | 10743  | 7668  | 5.437503688 | 8.078701925 | 6.971184745 | 7.3917686   |
| FYTTD1    | 84248  | 3824  | 10.9034462  | 24.99875046 | 18.45426524 | 58.0712507  |
| TMEM189   | 387521 | 2399  | 17.38006598 | 15.51190427 | 14.79609834 | 16.70734259 |
| NDUFA6    | 4700   | 1202  | 34.68783551 | 26.32465993 | 34.62820132 | 19.36715411 |
| PYGO2     | 90780  | 3227  | 12.92060064 | 17.05598796 | 13.81502468 | 10.16221748 |
| GCNT2     | 2651   | 4691  | 8.888249474 | 3.420156321 | 9.683697227 | 15.06025862 |
| ANKRD55   | 79722  | 2502  | 16.66457965 | 11.22178988 | 15.70702063 | 5.258943282 |
| LRRC37A4  | 55073  | 7238  | 5.760538585 | 6.834602931 | 5.283578586 | 4.279029571 |
| ZKSCAN5   | 23660  | 4361  | 9.560829691 | 7.664504176 | 9.544393026 | 8.401656545 |



|           |        |      |             |             |             |             |
|-----------|--------|------|-------------|-------------|-------------|-------------|
| C12orf49  | 79794  | 2798 | 14.90163627 | 20.38783677 | 16.46178627 | 17.94222945 |
| ING5      | 84289  | 5233 | 7.96766258  | 3.193665461 | 5.248809283 | 1.237860427 |
| GABPB1    | 2553   | 3069 | 13.58578634 | 9.511593907 | 14.4574128  | 7.321474027 |
| NAA40     | 79829  | 3352 | 12.43877634 | 16.08756256 | 15.06475476 | 14.67488475 |
| TJAP1     | 93643  | 2788 | 14.95508547 | 15.82527675 | 12.95900079 | 15.75576157 |
| ASAH1     | 427    | 2618 | 15.92619491 | 17.53381706 | 16.62515693 | 44.53744273 |
| ALDH5A1   | 7915   | 5170 | 8.06475402  | 2.715369272 | 8.827371074 | 1.213790087 |
| BMPR1A    | 657    | 3631 | 11.48300145 | 9.880490841 | 9.950342658 | 13.38004051 |
| POR       | 5447   | 2509 | 16.6180862  | 65.72187593 | 18.69478558 | 128.6056626 |
| UFD1L     | 7353   | 1783 | 23.26998997 | 15.87198596 | 20.38192875 | 11.80740423 |
| ATP6V1H   | 51606  | 2165 | 19.1641534  | 21.30548071 | 17.56640048 | 24.12316242 |
| CDC45     | 8318   | 2036 | 20.37838512 | 16.63583894 | 21.68885812 | 6.462611047 |
| MTHFD1L   | 25902  | 3613 | 11.48364022 | 7.277679712 | 9.882957285 | 1.400697917 |
| ACTR6     | 64431  | 1784 | 23.25694625 | 12.36571513 | 20.84423655 | 13.84322942 |
| TET1      | 80312  | 9601 | 4.321465692 | 4.084840383 | 5.699693073 | 1.981909501 |
| AMMECR1   | 9949   | 5618 | 7.385260255 | 8.369116497 | 6.167800082 | 5.80118315  |
| TK1       | 7083   | 1616 | 25.67474759 | 27.85408559 | 25.10313996 | 12.65180393 |
| SOD2      | 6648   | 1593 | 26.04544389 | 24.33953995 | 25.46558329 | 46.25493165 |
| HERC2P2   | 400322 | 6075 | 6.829694175 | 6.565769641 | 6.990656302 | 5.431424636 |
| ZNF37A    | 7587   | 7058 | 5.878491373 | 5.903897995 | 6.585810074 | 4.130030641 |
| TAF8      | 129685 | 4323 | 9.597592439 | 8.041151705 | 9.188418953 | 7.211206314 |
| DAG1      | 1605   | 5883 | 7.052590874 | 6.704298011 | 6.177286921 | 4.714049673 |
| GUK1      | 2987   | 1155 | 35.92241741 | 50.93318508 | 41.34229963 | 50.30050534 |
| GJA1      | 2697   | 3130 | 13.25571633 | 4.057975409 | 4.927727661 | 0.776085098 |
| ACOT9     | 23597  | 1727 | 24.02454668 | 17.80597018 | 21.65454705 | 110.7673859 |
| EIF2B3    | 8891   | 1994 | 20.80761891 | 8.940127773 | 18.22516497 | 4.872911445 |
| STXBP1    | 6812   | 3976 | 10.43520928 | 4.707732776 | 6.855063938 | 1.527380757 |
| PSTPIP1   | 9051   | 1870 | 22.18737546 | 28.00303792 | 21.58042215 | 16.23760933 |
| NPRL3     | 8131   | 2753 | 15.07097425 | 15.62176104 | 13.89122478 | 6.911846392 |
| PRSS57    | 400668 | 1073 | 38.47717236 | 12.87570033 | 28.15817416 | 0.188656909 |
| MRRF      | 92399  | 2036 | 20.27799899 | 24.07818794 | 23.03792585 | 11.03615117 |
| TMEM156   | 80008  | 1880 | 21.96064146 | 64.2421889  | 29.10784744 | 178.5250291 |
| CARS      | 833    | 2846 | 14.50667813 | 12.91897153 | 17.52045105 | 15.50579484 |
| NCDN      | 23154  | 3718 | 11.10435878 | 9.229756173 | 12.27474676 | 6.315693411 |
| VLDLR     | 7436   | 3646 | 11.32364398 | 9.289788283 | 8.808360869 | 6.829059282 |
| DBN1      | 1627   | 3058 | 13.50098298 | 17.34276618 | 12.09118157 | 9.466097908 |
| N4BP2L1   | 90634  | 3051 | 13.53195868 | 6.792343389 | 10.04139312 | 9.288771161 |
| SPATA13   | 221178 | 8457 | 4.881873708 | 1.396491935 | 4.372098053 | 2.321816212 |
| PCMTD2    | 55251  | 3929 | 10.50801882 | 6.465494034 | 8.926767724 | 3.761086026 |
| DGKE      | 8526   | 7784 | 5.303957598 | 2.8627015   | 5.971563142 | 3.224714672 |
| SUV39H2   | 79723  | 3148 | 13.11499554 | 8.84818475  | 12.9536083  | 5.20862068  |
| TMEM154   | 201799 | 3233 | 12.77018433 | 26.60483028 | 16.79560274 | 78.76755632 |
| METTL7A   | 25840  | 3390 | 12.17876282 | 18.73372128 | 11.65494111 | 10.80814873 |
| TMEM201   | 199953 | 3912 | 10.50143655 | 6.322706546 | 9.127588106 | 3.311719639 |
| TTF1      | 7270   | 3154 | 13.02524406 | 13.91821144 | 12.72799767 | 10.39742416 |
| HMOX2     | 3163   | 1872 | 21.94530971 | 13.56993913 | 18.73572136 | 8.542671033 |
| NOTCH1    | 4851   | 9309 | 4.413107721 | 7.444512295 | 5.719600372 | 17.6573463  |
| ZNF295    | 49854  | 7479 | 5.492929506 | 3.634922789 | 4.237560396 | 6.739508875 |
| UROS      | 7390   | 1371 | 29.96471173 | 37.22004727 | 29.58911319 | 20.52342228 |
| NDRG3     | 57446  | 2964 | 13.86019561 | 11.80321576 | 16.75165955 | 10.17607982 |
| SLC25A38  | 54977  | 2124 | 19.3416289  | 19.09394945 | 23.97345927 | 13.72399071 |
| FXR2      | 9513   | 3016 | 13.62122672 | 11.96912962 | 15.27190914 | 11.74570657 |
| RRP7A     | 27341  | 5455 | 7.531002709 | 7.843056915 | 7.59153313  | 4.341737299 |
| JKAMP     | 51528  | 2377 | 17.28297004 | 22.87386415 | 19.91072215 | 25.20780119 |
| DKFZp761f | 91056  | 4450 | 9.231824669 | 18.62781095 | 10.06570099 | 57.40791574 |
| EVPL      | 2125   | 6587 | 6.236772397 | 0.710412385 | 6.094444308 | 0.276584146 |
| NCOA1     | 8648   | 6952 | 5.909323903 | 6.442659614 | 6.047995902 | 8.473360058 |
| STX18     | 53407  | 2162 | 19.00167427 | 22.88106199 | 24.13845331 | 26.12287362 |
| NHLRC3    | 387921 | 3572 | 11.50101338 | 21.77172648 | 10.3512971  | 31.792439   |
| CARD9     | 64170  | 2147 | 19.13442933 | 32.79698574 | 18.10731071 | 14.70838501 |
| PANK1     | 53354  | 6976 | 5.859695185 | 4.152558632 | 4.936842905 | 1.683038138 |
| ANKMY2    | 57037  | 2567 | 15.92412684 | 22.0488905  | 16.46160977 | 22.63228814 |

|          |        |       |             |             |             |             |
|----------|--------|-------|-------------|-------------|-------------|-------------|
| AAAS     | 8086   | 1854  | 22.04813032 | 24.27842628 | 28.49039393 | 10.59093835 |
| BSDC1    | 55108  | 2925  | 13.9751226  | 18.13134324 | 12.20756399 | 25.74479898 |
| RANBP10  | 57610  | 5305  | 7.705416326 | 8.064821012 | 7.407910577 | 9.348741079 |
| KLF3     | 51274  | 5632  | 7.258031536 | 10.72224033 | 8.365856141 | 27.81959161 |
| UBAC2    | 337867 | 2840  | 14.39339212 | 9.964701043 | 12.94491144 | 9.123554387 |
| C3orf21  | 152002 | 2830  | 14.44425216 | 6.614115024 | 12.69201747 | 3.648011311 |
| MTPAP    | 55149  | 5620  | 7.273529112 | 6.383640969 | 5.977629369 | 2.449317203 |
| FGFR1OP  | 11116  | 1902  | 21.49171062 | 18.15934076 | 27.77139345 | 8.301499112 |
| C12orf65 | 91574  | 1901  | 21.5030161  | 16.52783196 | 18.56104953 | 10.96800257 |
| ACTR8    | 93973  | 3629  | 11.26404894 | 10.92979275 | 11.81890509 | 10.59836979 |
| STARD4   | 134429 | 2264  | 18.0553152  | 32.87372646 | 14.37184331 | 84.31555555 |
| ZNF254   | 9534   | 3986  | 10.25520161 | 10.78944008 | 9.276174922 | 10.36013247 |
| MED16    | 10025  | 2952  | 13.84730136 | 11.70022566 | 11.16545487 | 7.817374789 |
| NP1P     | 9284   | 1102  | 37.09367841 | 21.4339969  | 30.67655337 | 13.40953448 |
| TBCE     | 6905   | 1973  | 20.71831404 | 13.21410244 | 19.16876446 | 5.745573404 |
| MICB     | 4277   | 2497  | 16.37053809 | 24.27332409 | 18.36155115 | 41.91258396 |
| BMP2K    | 55589  | 3859  | 10.59270112 | 12.81908681 | 10.45747329 | 19.56620002 |
| NAB2     | 4665   | 2725  | 15.00081967 | 5.887689285 | 10.54485415 | 11.21715901 |
| ZNF267   | 10308  | 3281  | 12.45877282 | 17.65818288 | 13.97403024 | 32.51448058 |
| FAM104A  | 84923  | 2905  | 14.07133687 | 17.25898591 | 15.85544853 | 18.04787453 |
| RTKN2    | 219790 | 6659  | 6.138644482 | 1.505852352 | 4.219983971 | 0.516787907 |
| GOSR2    | 9570   | 3319  | 12.25454879 | 12.68917668 | 12.73183256 | 12.44214765 |
| C20orf4  | 25980  | 2682  | 15.16511836 | 13.45969237 | 13.9438489  | 9.359127146 |
| CCDC34   | 91057  | 2120  | 19.1853054  | 14.4000367  | 18.13859744 | 3.723927196 |
| DTX2     | 113878 | 2835  | 14.3466834  | 14.61971053 | 15.42714131 | 28.41858464 |
| IPMK     | 253430 | 6133  | 6.631802942 | 8.64734697  | 9.818385291 | 21.71827683 |
| PPP2R3C  | 55012  | 1843  | 22.06882661 | 21.03792032 | 22.46978471 | 20.42960852 |
| DGCR8    | 54487  | 4536  | 8.966677125 | 10.316328   | 10.10775865 | 4.864362007 |
| SLC12A9  | 56996  | 3308  | 12.2952985  | 21.35367626 | 11.11352735 | 19.33721907 |
| SMAP1    | 60682  | 3344  | 12.16293285 | 13.19404054 | 12.51028192 | 9.927731317 |
| FIS1     | 51024  | 785   | 51.81254451 | 44.28267366 | 55.44542782 | 21.91904886 |
| ULK1     | 8408   | 5239  | 7.763475366 | 6.209882033 | 8.832098251 | 5.911741942 |
| KDM1B    | 221656 | 3875  | 10.49621869 | 11.04100012 | 11.94099684 | 9.873304542 |
| GAR1     | 54433  | 1280  | 31.77566206 | 20.54238812 | 34.49883994 | 9.330705402 |
| C6orf228 | 221710 | 4710  | 8.635424085 | 4.589123231 | 8.38858819  | 4.512745353 |
| PKI55    | 150967 | 3353  | 12.13028555 | 11.23135214 | 11.46848392 | 2.475270916 |
| GK5      | 256356 | 10938 | 3.699804468 | 3.076223752 | 4.114431722 | 1.850693572 |
| PRR3     | 80742  | 3404  | 11.88850214 | 10.60484575 | 13.15874542 | 6.065729736 |
| BRMS1    | 25855  | 1455  | 27.81337545 | 22.6661425  | 38.33620412 | 24.90361957 |
| BCL2L11  | 10018  | 5238  | 7.725937624 | 7.402231223 | 8.91445824  | 13.37158965 |
| MTA3     | 57504  | 1872  | 21.61776777 | 8.927591536 | 23.25035301 | 8.218265804 |
| THOC1    | 9984   | 2133  | 18.97255568 | 14.10333448 | 18.82048976 | 7.497365295 |
| GOLGA5   | 9950   | 2891  | 13.99808415 | 15.10730066 | 16.73615024 | 17.71515127 |
| PGP      | 283871 | 3136  | 12.90448382 | 15.49028229 | 11.5209484  | 6.196801927 |
| MED22    | 6837   | 3887  | 10.41123264 | 10.2043267  | 11.57799181 | 8.02007844  |
| PIGO     | 84720  | 4087  | 9.901752208 | 12.15847534 | 9.512208488 | 8.86585918  |
| TRIM26   | 7726   | 3499  | 11.565722   | 17.06749343 | 14.31108558 | 36.56331563 |
| ARFIP1   | 27236  | 3091  | 13.0923524  | 10.95780268 | 14.14944859 | 17.15831837 |
| FKBP2    | 2286   | 747   | 54.17464695 | 65.32845778 | 46.38648041 | 49.86199569 |
| DES      | 1674   | 2268  | 17.84323689 | 0.982507428 | 28.59983322 | 0.981797836 |
| C11orf24 | 53838  | 2120  | 19.08889683 | 10.72119521 | 19.83286203 | 6.779457203 |
| PIM2     | 11040  | 2234  | 18.11479914 | 15.85962259 | 20.71233784 | 12.23272001 |
| CNTROB   | 116840 | 3803  | 10.64119413 | 7.089864542 | 8.555838351 | 3.246952574 |
| MBNL2    | 10150  | 4731  | 8.553891624 | 5.416562829 | 7.815437167 | 6.717677338 |
| CCDC58   | 131076 | 718   | 56.07809903 | 29.48343322 | 61.20784173 | 11.84124268 |
| SPOPL    | 339745 | 5741  | 7.01342538  | 8.694394946 | 5.594022597 | 12.69367543 |
| NDUFS4   | 4724   | 676   | 59.56224128 | 44.50061012 | 51.25843323 | 35.6346667  |
| SEC22C   | 9117   | 6416  | 6.275572803 | 5.105424666 | 6.454459668 | 3.722974724 |
| DCAF17   | 80067  | 5842  | 6.892173075 | 5.187477769 | 5.931307919 | 2.564145132 |
| CYP20A1  | 57404  | 10943 | 3.679436636 | 3.196996391 | 3.996705255 | 1.942340365 |
| NMRAL1   | 57407  | 1401  | 28.73952541 | 24.97125732 | 25.1852642  | 12.7150178  |
| C7orf68  | 29923  | 1432  | 28.11737088 | 9.803393253 | 22.72196456 | 8.057573456 |

|           |          |       |             |             |             |             |
|-----------|----------|-------|-------------|-------------|-------------|-------------|
| DCTPP1    | 79077    | 1143  | 35.22666238 | 37.04130368 | 32.71863759 | 27.09677693 |
| VANGL1    | 81839    | 8691  | 4.63284721  | 2.487029159 | 4.521800209 | 1.37421504  |
| CIAPIN1   | 57019    | 2106  | 19.11874411 | 14.07252947 | 25.48258755 | 10.09260713 |
| TSNAX     | 7257     | 2667  | 15.09714102 | 13.61894549 | 16.5573735  | 13.20683245 |
| MRPL10    | 124995   | 1903  | 21.15821077 | 21.31137605 | 24.75906557 | 16.27515293 |
| GM2A      | 2760     | 3690  | 10.91167347 | 26.20850547 | 13.7420983  | 42.40582956 |
| LOC10050  | 1.01E+08 | 1787  | 22.53165926 | 31.17413049 | 25.30214825 | 34.66325241 |
| KCTD5     | 54442    | 2479  | 16.24206337 | 21.21359968 | 17.04596703 | 29.96829072 |
| MRPL44    | 65080    | 1772  | 22.72239001 | 20.12033271 | 26.11250719 | 30.95836448 |
| FUT8      | 2530     | 5179  | 7.735023931 | 5.120117684 | 7.139376953 | 5.237587881 |
| ZNF710    | 374655   | 4506  | 8.890299365 | 14.68737403 | 7.736792194 | 23.31570792 |
| LCORL     | 254251   | 5057  | 7.921631192 | 6.257117112 | 7.269833592 | 5.844297803 |
| TIMM17B   | 10245    | 1117  | 35.86364274 | 37.30502421 | 33.48021733 | 28.08994965 |
| IRF9      | 10379    | 1699  | 23.57839255 | 22.16522879 | 15.04735499 | 79.35116111 |
| MPDU1     | 9526     | 1634  | 24.5163335  | 22.77420952 | 31.03325748 | 17.22008075 |
| TRIM37    | 4591     | 4520  | 8.862763039 | 6.014510517 | 7.80631751  | 4.388944374 |
| DPY19L3   | 147991   | 6044  | 6.62800942  | 25.18112569 | 7.341131682 | 14.46877379 |
| SCLT1     | 132320   | 3053  | 13.12141793 | 7.590762926 | 8.166263295 | 13.59250472 |
| CA8       | 767      | 2278  | 17.58546485 | 4.206235928 | 7.420009179 | 0.444312693 |
| MAP3K11   | 4296     | 3574  | 11.20864268 | 28.1190657  | 17.32133046 | 46.61414499 |
| C5orf25   | 375484   | 2087  | 19.09693472 | 9.823002873 | 12.04738218 | 5.819708566 |
| OSBPL1A   | 114876   | 4165  | 9.569100305 | 6.848159339 | 6.442536541 | 2.770334979 |
| GINS2     | 51659    | 1196  | 33.32383175 | 24.96620381 | 39.39506838 | 4.400627456 |
| CERS5     | 91012    | 1986  | 20.06812828 | 22.10374567 | 24.25625659 | 26.39933308 |
| FRY       | 10129    | 10718 | 3.718539165 | 4.61549319  | 3.666632358 | 3.75847581  |
| MED6      | 10001    | 1344  | 29.65424313 | 26.03030618 | 30.81236103 | 26.05669144 |
| RRP9      | 9136     | 1588  | 25.09779771 | 12.90970214 | 25.41271374 | 8.795712559 |
| MR1       | 3140     | 7860  | 5.070649207 | 13.4380016  | 5.698774734 | 25.08469625 |
| LOC90784  | 90784    | 3653  | 10.91029367 | 7.990988695 | 10.12177203 | 3.712765896 |
| PEX26     | 55670    | 4267  | 9.340356871 | 9.086685527 | 9.160459539 | 5.597985898 |
| RPP14     | 11102    | 3500  | 11.38722936 | 9.995637573 | 12.79781983 | 7.634459974 |
| PGAP1     | 80055    | 11113 | 3.586367567 | 2.506441608 | 1.958276831 | 4.389935748 |
| UBL7      | 84993    | 1461  | 27.27946801 | 26.69111556 | 30.36947289 | 22.16880087 |
| C22orf29  | 79680    | 6693  | 5.954774058 | 2.929818655 | 4.135410689 | 1.058570178 |
| MYPOP     | 339344   | 1909  | 20.87758133 | 17.85929846 | 23.35310877 | 19.40517649 |
| UBE2E3    | 10477    | 1559  | 25.56465861 | 25.58502282 | 26.15648425 | 16.62020171 |
| TAF4B     | 6875     | 4777  | 8.343165746 | 4.524758304 | 8.624770455 | 1.059393254 |
| PAPOLG    | 64895    | 7386  | 5.396060489 | 3.801369927 | 5.749829005 | 5.371792193 |
| METTL14   | 57721    | 2138  | 18.54579822 | 15.21682506 | 19.46824041 | 18.17883147 |
| CASP3     | 836      | 2689  | 14.74559933 | 15.49636    | 18.77912159 | 24.69195502 |
| C7orf44   | 55744    | 857   | 46.26711389 | 35.88204258 | 50.29415556 | 21.25857371 |
| HAUS4     | 54930    | 1657  | 23.92934013 | 31.73718383 | 19.38158342 | 14.65990559 |
| PEX6      | 5190     | 3514  | 11.28369852 | 18.26289505 | 10.52214947 | 10.13872507 |
| LEPROT    | 54741    | 4777  | 8.300380281 | 13.52762792 | 7.607489838 | 18.64532127 |
| ATG9A     | 79065    | 3795  | 10.44819937 | 17.615232   | 11.46894884 | 21.17635273 |
| DHRS9     | 10170    | 2882  | 13.75812512 | 82.88571757 | 24.48615902 | 75.15575412 |
| PER3      | 8863     | 6203  | 6.392216121 | 6.753594185 | 6.64203264  | 4.242423373 |
| FTSJD1    | 55783    | 4184  | 9.476796511 | 8.042001768 | 8.332214537 | 9.337660265 |
| MASTL     | 84930    | 3626  | 10.93516729 | 9.648298815 | 10.31367975 | 22.16333662 |
| ERCC2     | 2068     | 2568  | 15.44038808 | 12.92915499 | 10.86043166 | 5.123783525 |
| C16orf88  | 400506   | 1974  | 20.08658389 | 14.67489818 | 21.08566261 | 4.819734832 |
| URB2      | 9816     | 5613  | 7.064121967 | 3.969939154 | 7.264913405 | 2.055664562 |
| RNF7      | 9616     | 2274  | 17.43663879 | 16.46257302 | 17.56060681 | 19.94022221 |
| ZFYVE26   | 23503    | 9675  | 4.098285954 | 4.007533555 | 4.4331583   | 12.78387961 |
| RGS10     | 6001     | 910   | 43.34783564 | 59.99341512 | 53.63382404 | 75.85521128 |
| C17orf80  | 55028    | 3653  | 10.79839322 | 8.539987918 | 12.26180383 | 7.480946208 |
| MRPL39    | 54148    | 1171  | 33.68619166 | 18.83897164 | 30.13198561 | 13.65660134 |
| EIF4ENIF1 | 56478    | 3704  | 10.64971124 | 7.038721413 | 9.183813871 | 8.03375887  |
| C2orf67   | 151050   | 5410  | 7.291410431 | 5.35457468  | 5.741009227 | 6.248728302 |
| DNTTIP1   | 116092   | 1317  | 29.95180747 | 54.31229446 | 32.72748012 | 65.01701521 |
| PDE4B     | 5142     | 4309  | 9.154451249 | 25.75323207 | 6.7666041   | 22.97231701 |
| ITSN1     | 6453     | 6439  | 6.126188916 | 7.475052012 | 7.678309389 | 18.04537464 |

|          |        |       |             |             |             |             |
|----------|--------|-------|-------------|-------------|-------------|-------------|
| TMC6     | 11322  | 2891  | 13.64459717 | 81.47151428 | 14.54364148 | 82.41396461 |
| CCNJ     | 54619  | 4153  | 9.498321799 | 13.73589388 | 10.27679311 | 12.91684293 |
| MAP3K3   | 4215   | 4843  | 8.145061002 | 15.27574878 | 8.419979133 | 17.59705788 |
| FAM96B   | 51647  | 862   | 45.76163623 | 43.42910793 | 48.04154667 | 56.12586804 |
| ACAA1    | 30     | 1965  | 20.07457019 | 31.63883921 | 20.2145217  | 38.9405141  |
| GTF2B    | 2959   | 1651  | 23.89250783 | 20.38021526 | 22.9073121  | 71.48154276 |
| DDRGK1   | 65992  | 1298  | 30.39023916 | 36.73820842 | 34.67153634 | 36.80524781 |
| TIMM9    | 26520  | 1108  | 35.60156176 | 31.77577995 | 38.519424   | 15.52929003 |
| AMBRA1   | 55626  | 5044  | 7.820485811 | 8.261243467 | 7.749341961 | 20.94922016 |
| MINA     | 84864  | 5289  | 7.458220917 | 3.033456854 | 6.511517508 | 2.793969937 |
| TRIM41   | 90933  | 3641  | 10.83398254 | 11.32217706 | 11.37374711 | 8.005975354 |
| STK11    | 6794   | 3286  | 12.00442192 | 12.20629436 | 9.966262328 | 8.562876431 |
| RAB8B    | 51762  | 4877  | 8.088277718 | 15.16925391 | 13.86326095 | 73.46710835 |
| MFN1     | 55669  | 3527  | 11.12621045 | 13.14125274 | 10.30365153 | 29.67273097 |
| RABGEF1  | 27342  | 3832  | 10.24064308 | 11.80454984 | 10.75170367 | 16.64015966 |
| C8orf33  | 65265  | 2617  | 14.99508761 | 12.34648043 | 13.64429678 | 6.033416626 |
| ALDH1B1  | 219    | 3044  | 12.89163741 | 10.46815832 | 8.815100096 | 1.529521632 |
| CHM      | 1121   | 5442  | 7.210978365 | 6.510547018 | 5.707250996 | 7.17911991  |
| ATG4B    | 23192  | 2912  | 13.47601108 | 14.00356501 | 14.36620287 | 8.272333342 |
| ARID3A   | 1820   | 2823  | 13.90086584 | 16.81309311 | 29.26402469 | 32.41156431 |
| APTX     | 54840  | 2179  | 18.00924473 | 11.55580238 | 18.03532153 | 10.21898803 |
| MYL6B    | 140465 | 1072  | 36.60647786 | 21.41022997 | 36.65948285 | 17.93912498 |
| GCLM     | 2730   | 3074  | 12.76582442 | 7.756375168 | 11.89078195 | 5.729118763 |
| B3GAT3   | 26229  | 1679  | 23.37233131 | 22.42925773 | 21.64441867 | 20.13437767 |
| APH1B    | 83464  | 4205  | 9.283652342 | 6.51805475  | 10.14970792 | 5.921224767 |
| PACS2    | 23241  | 6332  | 6.165154469 | 6.440047585 | 6.940497531 | 4.699469813 |
| DENND1B  | 163486 | 8388  | 4.654000727 | 6.375756359 | 5.692698625 | 8.712067182 |
| FAM149B1 | 317662 | 3149  | 12.39687459 | 14.08183686 | 10.6682366  | 12.59957356 |
| WDR89    | 112840 | 3164  | 12.33810306 | 8.380875311 | 9.415660984 | 4.67045101  |
| QPRT     | 23475  | 1575  | 24.78587816 | 15.27995553 | 25.48832042 | 16.83694035 |
| MZT2B    | 80097  | 967   | 40.36996701 | 39.63518281 | 34.95921594 | 18.63099152 |
| TEP1     | 7011   | 10694 | 3.65043558  | 5.000920548 | 2.607966009 | 8.177414325 |
| LOC38869 | 388692 | 12267 | 3.182339455 | 3.48772116  | 3.169185301 | 5.874678015 |
| PPFIBP2  | 8495   | 3582  | 10.89831326 | 13.43714682 | 12.09195312 | 16.7277899  |
| NSUN5    | 55695  | 2446  | 15.95983569 | 31.15649149 | 14.42541094 | 20.60702652 |
| DYNLL2   | 140735 | 1522  | 25.51469903 | 25.03573528 | 25.40414673 | 19.55127651 |
| PITHD1   | 57095  | 1641  | 23.66445578 | 16.0233131  | 22.27438374 | 10.97877441 |
| CDKN1B   | 1027   | 2413  | 16.09339906 | 18.56169483 | 14.62269173 | 21.30830136 |
| C3orf58  | 205428 | 4370  | 8.886355132 | 10.14730075 | 8.702804816 | 7.179971112 |
| TUBA1A   | 7846   | 1677  | 23.15645315 | 58.99684677 | 21.29226277 | 51.78412773 |
| ASB7     | 140460 | 4974  | 7.807272201 | 8.467104426 | 8.113266872 | 10.86620555 |
| NAIP     | 4671   | 6551  | 5.927854057 | 7.007103199 | 6.869738081 | 9.393737496 |
| LMBRD2   | 92255  | 3237  | 11.99671669 | 12.45990607 | 14.1639769  | 15.88413074 |
| CCNDBP1  | 23582  | 2515  | 15.44070454 | 41.55408713 | 18.06211678 | 32.03446817 |
| KIAA0391 | 9692   | 2684  | 14.46846942 | 10.70991667 | 14.40577918 | 6.109067772 |
| EIF2C2   | 27161  | 3520  | 11.03220793 | 6.140559778 | 9.903973189 | 3.335475583 |
| PWWP2A   | 114825 | 4016  | 9.669664325 | 6.491888475 | 12.15308264 | 6.451915951 |
| MIS18A   | 54069  | 1587  | 24.46967355 | 17.69181996 | 22.3666288  | 7.015493045 |
| SCAI     | 286205 | 12221 | 3.160869467 | 3.045009275 | 3.33671213  | 1.457633577 |
| BPNT1    | 10380  | 2461  | 15.69645907 | 15.1211127  | 18.20088152 | 21.8797552  |
| SH3PXD2B | 285590 | 7793  | 4.956882556 | 1.401103754 | 2.087633341 | 1.220859304 |
| DYRK2    | 8445   | 6159  | 6.271957422 | 4.377781272 | 5.591722049 | 2.826576102 |
| PPP1R12C | 54776  | 2942  | 13.13017871 | 20.75328199 | 14.14789191 | 23.11899998 |
| CACNA2D4 | 93589  | 5343  | 7.229830762 | 13.13724419 | 8.264741741 | 11.17658891 |
| PEMT     | 10400  | 1028  | 37.5768344  | 17.34106496 | 34.940087   | 9.058100872 |
| MAPRE2   | 10982  | 3267  | 11.82399319 | 22.57655912 | 13.19317151 | 19.64185784 |
| RASSF4   | 83937  | 2509  | 15.3961681  | 23.4467233  | 25.26322376 | 33.24061042 |
| HDAC5    | 10014  | 5327  | 7.251546041 | 4.015757037 | 6.623719757 | 8.246116625 |
| EIF2B2   | 8892   | 1557  | 24.80988167 | 18.74828626 | 28.36128139 | 14.56135687 |
| VPS8     | 23355  | 5064  | 7.628156746 | 8.360626007 | 7.092892858 | 11.11280093 |
| RNF214   | 257160 | 2695  | 14.33357542 | 9.01252788  | 14.19018249 | 8.562853572 |
| OSBPL3   | 26031  | 6730  | 5.739819578 | 2.979931891 | 6.12192102  | 2.07542222  |

|           |        |       |             |             |             |             |
|-----------|--------|-------|-------------|-------------|-------------|-------------|
| KLHL7     | 55975  | 3326  | 11.55279603 | 5.560767539 | 12.06978492 | 6.573156103 |
| PSPH      | 5723   | 2142  | 17.93865527 | 15.29243915 | 19.13596812 | 6.709826923 |
| MARK4     | 57787  | 5243  | 7.328743008 | 4.845112733 | 7.777600409 | 5.868622386 |
| RAVER2    | 55225  | 4376  | 8.780758591 | 9.929701445 | 9.077133258 | 3.746969355 |
| PCYT2     | 5833   | 3598  | 10.6794329  | 11.27169222 | 8.514811117 | 3.825781735 |
| STX3      | 6809   | 6498  | 5.913296336 | 9.156098311 | 7.738653925 | 23.27090807 |
| TARS2     | 80222  | 2390  | 16.07723832 | 15.94325903 | 16.70829284 | 11.26486978 |
| ZNF83     | 55769  | 2985  | 12.87256268 | 11.12297153 | 12.5992253  | 10.10448931 |
| ABT1      | 29777  | 2264  | 16.97199629 | 17.81480386 | 17.2648767  | 12.69650996 |
| ARHGEF40  | 55701  | 5458  | 7.040051226 | 1.428938066 | 7.509938385 | 3.560493009 |
| C10orf118 | 55088  | 6277  | 6.121491093 | 12.06995584 | 7.135951794 | 36.92544975 |
| SUFU      | 51684  | 4994  | 7.694152902 | 8.52243548  | 9.90000684  | 13.94383838 |
| SIK2      | 23235  | 5694  | 6.748261256 | 7.631256327 | 7.161566376 | 7.465764176 |
| SIRPB1    | 10326  | 2469  | 15.56281879 | 46.93114462 | 13.86315567 | 49.27490751 |
| SLC25A22  | 79751  | 2968  | 12.94629366 | 15.09075796 | 9.966262328 | 9.343919887 |
| C12orf41  | 54934  | 2402  | 15.99691906 | 12.52390193 | 14.1618845  | 10.70294155 |
| ISOC2     | 79763  | 1170  | 32.84153811 | 26.66374005 | 40.99285541 | 18.33970895 |
| SLC33A1   | 9197   | 3811  | 10.0825504  | 7.952045428 | 8.593318817 | 5.789752312 |
| HEATR3    | 55027  | 2625  | 14.6379427  | 7.97953233  | 13.68320359 | 3.315977565 |
| ADAT2     | 134637 | 6270  | 6.128325294 | 2.843160252 | 4.077425219 | 1.033129763 |
| LPPR3     | 79948  | 2357  | 16.3023333  | 17.86821273 | 11.74302238 | 1.116493517 |
| SRI       | 6717   | 2030  | 18.92837418 | 18.77063502 | 20.92031381 | 21.33979146 |
| MFAP3     | 4238   | 5346  | 7.187542011 | 8.086333865 | 8.0624937   | 11.17031698 |
| CHAF1B    | 8208   | 2297  | 16.63918739 | 10.76814454 | 17.56873723 | 4.230119905 |
| ZNF100    | 163227 | 4479  | 8.533202372 | 10.4973647  | 10.7081136  | 10.98240985 |
| DDHD2     | 23259  | 4723  | 8.092359395 | 9.719147376 | 9.036528011 | 4.671764993 |
| KIAA1586  | 57691  | 2903  | 13.16576418 | 11.89771482 | 12.30007739 | 6.973092076 |
| NEK6      | 10783  | 2810  | 13.60149944 | 13.87748037 | 10.52664291 | 8.500571469 |
| MTERFD1   | 51001  | 1424  | 26.84003752 | 14.70946093 | 24.77847974 | 9.524391726 |
| ENTPD6    | 955    | 2787  | 13.71374719 | 12.23301068 | 14.63148868 | 12.34765221 |
| PCGF5     | 84333  | 7179  | 5.323890991 | 5.245678189 | 5.856758255 | 18.30008804 |
| LRP6      | 4040   | 10088 | 3.78868095  | 2.120533082 | 3.392955129 | 0.983248839 |
| ZNF618    | 114991 | 9133  | 4.184847632 | 3.464605413 | 1.966408049 | 2.970050108 |
| MRPS9     | 64965  | 1473  | 25.94719173 | 20.57382561 | 25.10171978 | 7.97072237  |
| LETMD1    | 25875  | 2133  | 17.91852481 | 22.14745859 | 16.0469439  | 18.50615484 |
| TPRA1     | 131601 | 1873  | 20.4058801  | 27.95818522 | 26.84771661 | 47.12172144 |
| GABARAPL  | 11345  | 1031  | 37.07101205 | 36.52640516 | 45.90473962 | 39.46479287 |
| XYLT2     | 64132  | 3567  | 10.71494629 | 8.808356756 | 10.24734054 | 6.696553358 |
| INSIG2    | 51141  | 2592  | 14.74545271 | 12.8094406  | 17.3625209  | 17.10336458 |
| NUFIP1    | 26747  | 3487  | 10.96077242 | 8.115787486 | 9.512964592 | 2.496254978 |
| TSEN15    | 116461 | 2090  | 18.18939103 | 11.94127306 | 16.78146908 | 8.2327528   |
| ZNF263    | 10127  | 3305  | 11.50251959 | 8.697554109 | 12.21040527 | 7.717408996 |
| CEP41     | 95681  | 3526  | 10.78157324 | 8.847582491 | 8.808525218 | 3.329799788 |
| ICOSLG    | 23308  | 3239  | 11.73690252 | 2.820666895 | 12.00259219 | 3.249861338 |
| ZNF652    | 22834  | 11492 | 3.308025344 | 5.487439069 | 3.015201955 | 4.19231373  |
| SBDSP1    | 155370 | 1734  | 21.92377581 | 17.34856542 | 27.41584274 | 10.38994741 |
| HMBS      | 3145   | 1526  | 24.91207553 | 14.45637994 | 26.44520932 | 7.03062237  |
| PYCR1     | 5831   | 2059  | 18.46324782 | 6.168753293 | 16.41843702 | 2.261225764 |
| LRR8A     | 56262  | 4637  | 8.198366887 | 4.853590934 | 8.019434548 | 4.059927594 |
| MTM1      | 4534   | 3452  | 11.01269619 | 11.61931728 | 11.32319839 | 16.06764439 |
| INO80E    | 283899 | 1185  | 32.08086688 | 30.08711355 | 33.87688157 | 14.69103984 |
| RWDD2B    | 10069  | 1712  | 22.20550657 | 19.52389177 | 19.62282538 | 10.05049845 |
| WDR19     | 57728  | 4534  | 8.339532662 | 3.931763295 | 7.689013151 | 4.107511114 |
| SLC35C2   | 51006  | 2461  | 15.36425887 | 16.56984206 | 15.45357864 | 13.40751916 |
| TOMM7     | 54543  | 746   | 50.68557787 | 57.3510395  | 48.43122546 | 34.73310249 |
| C11orf54  | 28970  | 2403  | 15.73509825 | 13.90965573 | 13.62843862 | 18.36433297 |
| SYF2      | 25949  | 1777  | 21.27824484 | 26.58442834 | 25.20673574 | 32.12433278 |
| GPR85     | 54329  | 4951  | 7.637132112 | 2.430411023 | 4.822294089 | 1.471912556 |
| KBTBD6    | 89890  | 5228  | 7.232486819 | 3.66557209  | 5.253829185 | 1.239044303 |
| NCOA2     | 10499  | 6157  | 6.141211806 | 10.96610419 | 7.343663949 | 30.90516992 |
| DENND1C   | 79958  | 2804  | 13.48482207 | 33.53616011 | 14.91953736 | 39.92266805 |
| OSGIN2    | 734    | 4246  | 8.905191024 | 9.70891349  | 8.956961151 | 13.25370323 |

|          |        |      |             |             |             |             |
|----------|--------|------|-------------|-------------|-------------|-------------|
| HSPA1B   | 3304   | 2551 | 14.82220348 | 10.30743112 | 13.33471054 | 12.53773436 |
| FAM134C  | 162427 | 3818 | 9.903468069 | 9.805105038 | 11.73189351 | 16.59513727 |
| ZC3HC1   | 51530  | 1945 | 19.44032961 | 15.81023676 | 19.98786431 | 13.84217932 |
| TRMT2A   | 27037  | 2917 | 12.96244124 | 14.59069002 | 14.34157791 | 7.841776316 |
| POLR3C   | 10623  | 1888 | 20.02724634 | 24.78541515 | 22.60567892 | 23.05201564 |
| RAD51    | 5888   | 2302 | 16.33668763 | 15.48793639 | 16.61274622 | 6.683142304 |
| ZCCHC7   | 84186  | 2701 | 13.92338205 | 9.982508276 | 11.26434862 | 7.119860045 |
| NIT2     | 56954  | 1271 | 29.58855619 | 36.99268016 | 30.58725105 | 15.60820501 |
| ZNF680   | 340252 | 3050 | 12.33018194 | 12.05488295 | 9.005579992 | 9.889147731 |
| TRIM66   | 9866   | 9753 | 3.855947393 | 5.597663054 | 4.267722546 | 3.611465411 |
| CDKN2C   | 1031   | 2104 | 17.87407553 | 27.00681303 | 15.46475915 | 14.04686977 |
| ZNF654   | 55279  | 4957 | 7.586656228 | 8.810814244 | 7.58698558  | 13.14950451 |
| ARNTL2   | 56938  | 1930 | 19.48552068 | 15.8176569  | 15.10740781 | 9.964115016 |
| LRRFIP2  | 9209   | 3826 | 9.829340021 | 6.639552028 | 8.559628335 | 7.565950706 |
| PARVB    | 29780  | 1808 | 20.80036223 | 19.10346578 | 21.61929251 | 5.710106201 |
| C1orf174 | 339448 | 1705 | 22.05692371 | 18.4278056  | 19.82730898 | 12.1101138  |
| LATS1    | 9113   | 4756 | 7.907286569 | 8.339827141 | 7.907629841 | 8.725382024 |
| STX12    | 23673  | 3098 | 12.13913974 | 20.35560032 | 11.59406373 | 34.30443933 |
| MAP2K4   | 6416   | 3752 | 10.02320227 | 9.680631027 | 9.122636285 | 10.19697631 |
| STARD3   | 10948  | 2834 | 13.26995586 | 18.0845157  | 15.1343707  | 24.78574998 |
| NVL      | 4931   | 2921 | 12.87471925 | 9.688377597 | 13.38160933 | 8.316146373 |
| NOC4L    | 79050  | 1682 | 22.35853444 | 17.75242554 | 25.87673058 | 13.96061124 |
| TIMM13   | 26517  | 1977 | 19.02228372 | 14.76534229 | 19.66433793 | 6.553084081 |
| SFT2D1   | 113402 | 717  | 52.45056474 | 64.95401829 | 54.81027282 | 77.35775237 |
| ICAM3    | 3385   | 1796 | 20.82553939 | 140.325037  | 36.11604774 | 403.0543507 |
| MSH3     | 4437   | 4645 | 8.052243004 | 10.26613445 | 9.461190606 | 6.711312141 |
| ELOVL6   | 79071  | 3392 | 11.02673017 | 42.96361315 | 13.26758672 | 17.96317445 |
| NPHP4    | 261734 | 5022 | 7.447763591 | 5.768269418 | 6.352847265 | 2.499121765 |
| FANCM    | 57697  | 7144 | 5.23553594  | 3.618223884 | 5.796726376 | 2.380182599 |
| NDST2    | 8509   | 4006 | 9.336662195 | 10.67994894 | 11.23406245 | 10.51053507 |
| ZNF562   | 54811  | 5801 | 6.447624332 | 7.260020241 | 6.628827197 | 6.874415791 |
| ITFG3    | 83986  | 2970 | 12.59349116 | 11.77937088 | 14.58362831 | 8.31525969  |
| TUBGCP6  | 85378  | 6040 | 6.192494826 | 6.124209548 | 5.5619664   | 4.390427326 |
| JMY      | 133746 | 9145 | 4.089958311 | 2.485394625 | 4.043174766 | 1.505211884 |
| ATF1     | 466    | 2505 | 14.93120509 | 13.87700552 | 15.94124547 | 15.11145604 |
| TRAPPC5  | 126003 | 814  | 45.69813585 | 57.48754766 | 43.34711935 | 47.74734851 |
| STRADA   | 92335  | 2802 | 13.27561834 | 17.57531168 | 11.98939224 | 23.62392512 |
| TMEM87B  | 84910  | 5228 | 7.115203249 | 15.42950112 | 6.991634223 | 28.49801896 |
| MRPS23   | 51649  | 1498 | 24.83196434 | 20.23047071 | 28.49100253 | 11.8916822  |
| UQCC     | 55245  | 2461 | 15.11510873 | 14.57783919 | 15.7969915  | 15.38163241 |
| LMLN     | 89782  | 7154 | 5.199648111 | 3.675462231 | 5.345616691 | 1.669458053 |
| PAQR4    | 124222 | 2701 | 13.77204094 | 8.827507319 | 14.78445757 | 2.248376856 |
| KATNB1   | 10300  | 2661 | 13.97906147 | 8.70898129  | 13.65688799 | 4.564348657 |
| PHF23    | 79142  | 2041 | 18.22551817 | 15.94001567 | 21.6357252  | 21.22478034 |
| TNK2     | 10188  | 4476 | 8.310608263 | 9.010883811 | 8.638317991 | 39.843572   |
| GPD1L    | 23171  | 4068 | 9.144120596 | 7.175782129 | 8.15430372  | 1.3435544   |
| TMEM161  | 153396 | 2594 | 14.34012436 | 13.83040179 | 14.17253218 | 13.266348   |
| FRAT2    | 23401  | 2222 | 16.74090125 | 32.39196992 | 21.10945861 | 54.29685073 |
| SLC39A3  | 29985  | 3005 | 12.3787962  | 7.860320993 | 15.46843511 | 5.860669244 |
| LTB4R    | 1241   | 4331 | 8.58884382  | 17.64756658 | 7.024937806 | 31.45569725 |
| TMEM167  | 56900  | 2768 | 13.4386859  | 22.9433942  | 15.49523358 | 22.4514671  |
| SEMA3F   | 6405   | 3531 | 10.47688938 | 7.446688417 | 8.496866642 | 6.478182247 |
| ING1     | 3621   | 2897 | 12.76972607 | 11.9992747  | 11.74209409 | 12.50768604 |
| MTF1     | 4520   | 7986 | 4.632343653 | 8.315068877 | 5.079723789 | 31.30473901 |
| PPP2CB   | 5516   | 1987 | 18.61796498 | 12.78456269 | 21.1603762  | 15.58712432 |
| CDK10    | 8558   | 1815 | 20.38231207 | 17.43374173 | 22.46719501 | 8.14176694  |
| TADA2B   | 93624  | 4312 | 8.579289521 | 10.49049977 | 9.309857296 | 14.31836809 |
| PIGX     | 54965  | 3106 | 11.91046246 | 7.2460081   | 14.55728877 | 3.128327567 |
| IGHMBP2  | 3508   | 3955 | 9.353703266 | 6.986410343 | 10.36390486 | 6.704976245 |
| FBXL18   | 80028  | 8253 | 4.482478664 | 3.618027354 | 4.17295724  | 2.992405341 |
| PLXNA3   | 55558  | 6763 | 5.47004235  | 3.624367192 | 7.46666538  | 8.081589975 |
| TFE3     | 7030   | 3431 | 10.78224903 | 15.91198128 | 11.33092279 | 36.75697512 |

|          |        |       |             |             |             |             |
|----------|--------|-------|-------------|-------------|-------------|-------------|
| TMBIM1   | 64114  | 2375  | 15.57637744 | 16.41925045 | 24.37558931 | 51.31038968 |
| EEFSEC   | 60678  | 2239  | 16.52250845 | 13.933263   | 14.4379493  | 8.408166259 |
| CSF3R    | 1441   | 3500  | 10.56968469 | 56.21750304 | 11.22827589 | 118.7968241 |
| KAT8     | 84148  | 1840  | 20.10537849 | 18.04460328 | 20.89881879 | 10.34147452 |
| C2orf197 | 284756 | 2732  | 13.46614577 | 7.911702203 | 11.52321722 | 2.296960012 |
| FZR1     | 51343  | 3615  | 10.17690463 | 10.35570983 | 7.831855608 | 8.063556367 |
| GDF11    | 10220  | 4260  | 8.636035269 | 4.603116492 | 7.489201635 | 0.902851736 |
| CIR1     | 9541   | 1809  | 20.33693214 | 21.55650626 | 22.42491663 | 56.17428922 |
| PCYOX1L  | 78991  | 2561  | 14.365291   | 30.88856036 | 13.36514305 | 15.88762259 |
| JMJD8    | 339123 | 2074  | 17.7384331  | 16.86824084 | 17.01280383 | 6.148996319 |
| IMPACT   | 55364  | 3764  | 9.774046293 | 5.860902176 | 7.521827317 | 1.559627265 |
| SH3PXD2A | 9644   | 11264 | 3.266114191 | 0.415437356 | 6.640163842 | 0.611024622 |
| SIN3B    | 23309  | 5129  | 7.172842708 | 8.776019169 | 7.826887241 | 11.76131822 |
| SRP19    | 6728   | 1967  | 18.70336057 | 19.03197307 | 18.47533246 | 18.21551029 |
| DNAJB14  | 79982  | 2783  | 13.21937127 | 12.3306624  | 11.76756666 | 18.76631212 |
| RCCD1    | 91433  | 2774  | 13.26226036 | 8.755862522 | 10.8917523  | 5.691943515 |
| ATXN7L1  | 222255 | 5691  | 6.46450716  | 3.915527759 | 4.195251807 | 2.454329915 |
| RASAL3   | 64926  | 3290  | 11.18222196 | 12.86875687 | 8.926620617 | 18.70467305 |
| F11R     | 50848  | 4830  | 7.616875828 | 21.03761993 | 9.79871357  | 46.64665103 |
| CHAT     | 1103   | 2528  | 14.5528126  | 0.08814584  | 7.020537957 | 0.160149417 |
| SOAT1    | 6646   | 3407  | 10.79821258 | 9.352824748 | 11.41074144 | 31.01492999 |
| TTC33    | 23548  | 5519  | 6.665973953 | 3.956804331 | 6.278438279 | 3.227711531 |
| CCDC104  | 112942 | 1315  | 27.97681388 | 31.0101759  | 26.83236133 | 14.16232349 |
| DIEXF    | 27042  | 8505  | 4.325633186 | 3.641827534 | 5.018168347 | 2.213507849 |
| RCL1     | 10171  | 2169  | 16.96150772 | 14.38293032 | 12.27380356 | 5.599691921 |
| BRP44    | 25874  | 2392  | 15.38023004 | 17.14097575 | 14.39774921 | 12.77874511 |
| SNAPC1   | 6617   | 2684  | 13.70697103 | 7.721102713 | 9.446412579 | 4.525235386 |
| DPYSL2   | 1808   | 4655  | 7.903224543 | 4.83482302  | 7.216815694 | 0.869726586 |
| GOLGA1   | 2800   | 4899  | 7.467875909 | 7.050227829 | 6.253580404 | 7.355039315 |
| ZBTB24   | 9841   | 5597  | 6.5365596   | 6.688563701 | 5.62469706  | 3.508236503 |
| QDPR     | 5860   | 1660  | 22.03923137 | 16.64533308 | 24.81959546 | 7.804486283 |
| PDE6D    | 5147   | 1140  | 32.09221411 | 29.3200901  | 30.58068914 | 26.99051506 |
| RBM18    | 92400  | 3203  | 11.42214302 | 9.670228904 | 13.19292921 | 11.81835697 |
| RNF181   | 51255  | 716   | 51.09654201 | 52.90720168 | 57.54263752 | 88.2092252  |
| CHMP2B   | 25978  | 2643  | 13.84227169 | 18.04244969 | 12.87054354 | 23.66648455 |
| LIG4     | 3981   | 4115  | 8.890674138 | 8.231000749 | 8.3178934   | 13.47885989 |
| ZHX3     | 23051  | 9991  | 3.661808035 | 1.338200489 | 3.764256583 | 0.567311397 |
| SLC25A12 | 8604   | 3995  | 9.15772818  | 9.147574543 | 8.567742513 | 6.080466472 |
| ACOT13   | 55856  | 4407  | 8.301593846 | 8.6463329   | 8.725624363 | 9.87569901  |
| HEATR6   | 63897  | 3935  | 9.297363171 | 7.644831624 | 6.980182713 | 5.350089389 |
| NTAN1    | 123803 | 1137  | 32.17689013 | 14.69872591 | 32.33381572 | 14.24301586 |
| PCK2     | 5106   | 2221  | 16.47236564 | 15.95245244 | 14.84035244 | 12.8511795  |
| ANKRD18A | 253650 | 3756  | 9.740448371 | 10.67888266 | 8.550395028 | 1.886317946 |
| ATF5     | 22809  | 2293  | 15.95513479 | 10.39821076 | 21.46940663 | 40.16796016 |
| EXTL3    | 2137   | 6172  | 5.927596254 | 5.090636511 | 6.264600021 | 8.330675825 |
| PHF2     | 5253   | 5349  | 6.839619383 | 8.956632496 | 7.346974315 | 9.612438061 |
| CRBN     | 51185  | 2596  | 14.09288293 | 13.30472501 | 13.26633902 | 11.54062855 |
| C9orf69  | 90120  | 2866  | 12.69390716 | 14.61707772 | 12.23770774 | 6.286171948 |
| ARAP3    | 64411  | 5281  | 6.888986539 | 14.89489447 | 5.961262913 | 19.01244386 |
| SUV420H1 | 51111  | 4562  | 7.974734308 | 8.792170814 | 9.587011311 | 11.04883535 |
| MGAT5    | 4249   | 2421  | 15.02715321 | 16.10727791 | 12.30530828 | 8.528601413 |
| BCAS2    | 10286  | 1310  | 27.77155566 | 20.41215433 | 29.67663824 | 19.3157312  |
| CC2D1B   | 200014 | 5670  | 6.416355893 | 7.545657049 | 6.632925489 | 7.81868095  |
| ZBED6    | 1E+08  | 2940  | 12.37440065 | 10.23211307 | 10.27677581 | 10.67226999 |
| CENPK    | 64105  | 1781  | 20.42714088 | 17.89167542 | 20.87934756 | 7.615235159 |
| NDUFB3   | 4709   | 770   | 47.24771157 | 52.09075747 | 60.64147047 | 43.37761349 |
| C18orf19 | 125228 | 4392  | 8.283410271 | 4.870659776 | 7.600863455 | 3.364596311 |
| NDUFA1   | 4694   | 502   | 72.47158947 | 69.2468104  | 65.23732672 | 60.08346729 |
| ZNF766   | 90321  | 2975  | 12.22881947 | 7.115665563 | 9.303631509 | 7.824981257 |
| TANC2    | 26115  | 11747 | 3.097023743 | 2.238380591 | 2.608009738 | 2.08511896  |
| SAMSN1   | 64092  | 1893  | 19.21856202 | 59.7987342  | 29.24279317 | 214.9403141 |
| CENPV    | 201161 | 1181  | 30.80502787 | 36.03813953 | 32.56039506 | 14.05517931 |



|           |        |       |             |             |             |             |
|-----------|--------|-------|-------------|-------------|-------------|-------------|
| AKT1S1    | 84335  | 2389  | 15.2284378  | 14.73736467 | 15.21179529 | 15.50627121 |
| NLRP3     | 114548 | 4470  | 8.138867542 | 7.826561858 | 5.861143268 | 11.72909967 |
| SNX9      | 51429  | 4200  | 8.662080455 | 14.2188475  | 11.72127367 | 15.51954616 |
| PHKG2     | 5261   | 5503  | 6.61107358  | 8.705983503 | 5.567197964 | 10.59413275 |
| THEM4     | 117145 | 5172  | 7.034172063 | 7.712113412 | 9.27332576  | 4.070495311 |
| TFIP11    | 24144  | 2941  | 12.3701931  | 10.22863395 | 13.43429118 | 9.360872275 |
| NKG7      | 4818   | 826   | 44.04447689 | 45.59167521 | 42.71737911 | 80.38337415 |
| GPSM2     | 29899  | 3039  | 11.97128592 | 15.54476116 | 8.829603387 | 3.996621184 |
| FLJ31306  | 379025 | 2498  | 14.56394632 | 19.00054518 | 19.45376105 | 15.88312936 |
| TLN2      | 83660  | 11650 | 3.122810121 | 1.778836024 | 2.593452436 | 0.556027778 |
| IRS1      | 3667   | 8743  | 4.1377504   | 0.152921893 | 2.392450117 | 0.625137744 |
| MRPL21    | 219927 | 726   | 49.8296856  | 44.19821846 | 55.87696168 | 21.19090025 |
| PAAF1     | 80227  | 1585  | 22.82419668 | 19.40120536 | 21.32843017 | 10.08951431 |
| EML3      | 256364 | 3265  | 11.08004648 | 19.92868115 | 12.87769296 | 13.63992338 |
| RPUSD4    | 84881  | 2527  | 14.31592867 | 8.729891488 | 12.87607964 | 4.405851786 |
| TAF1B     | 9014   | 2306  | 15.68792357 | 16.13749278 | 14.01845988 | 16.06438938 |
| KIAA1737  | 85457  | 4397  | 8.227507788 | 6.28411483  | 6.631179683 | 3.268694398 |
| SEC14L1   | 6397   | 5584  | 6.47857302  | 8.260452318 | 9.156681993 | 16.74823329 |
| CEBPE     | 1053   | 1250  | 28.94108139 | 210.7105867 | 43.10209132 | 243.724351  |
| YAF2      | 10138  | 5095  | 7.100363443 | 7.522516541 | 6.220356075 | 6.635057922 |
| DYSF      | 8291   | 7004  | 5.165098764 | 48.96337833 | 7.511408564 | 102.6884281 |
| CECR5     | 27440  | 1809  | 19.99798327 | 10.83984315 | 21.14015578 | 3.804633135 |
| CDK5RAP1  | 51654  | 2104  | 17.19408353 | 15.03908804 | 17.47316943 | 9.909777987 |
| FBXW8     | 26259  | 4871  | 7.426883955 | 5.764097368 | 6.810040553 | 2.701267931 |
| GZF1      | 64412  | 4752  | 7.612868633 | 5.345733599 | 7.825361532 | 8.562331956 |
| NUDT19    | 390916 | 2984  | 12.05494825 | 10.60396824 | 10.33765924 | 7.394351897 |
| PAN2      | 9924   | 5372  | 6.696196124 | 6.305020119 | 5.978273218 | 4.672594752 |
| AFMID     | 125061 | 1770  | 20.32314439 | 16.99571324 | 22.79965504 | 5.718329462 |
| ZEB1      | 6935   | 6278  | 5.729844787 | 4.47227115  | 5.55304008  | 5.96517038  |
| TGFBR2    | 7048   | 4704  | 7.647101525 | 6.063474415 | 14.10361715 | 25.64787464 |
| RIOK3     | 8780   | 4035  | 8.914985273 | 11.32111533 | 8.639897305 | 17.40838053 |
| NDUFB7    | 4713   | 573   | 62.77829943 | 56.38872476 | 60.10369302 | 43.10003714 |
| TRAF3IP3  | 80342  | 2267  | 15.86765133 | 39.21933887 | 18.45363156 | 68.66687058 |
| SLC35C1   | 55343  | 3531  | 10.18747255 | 7.509795946 | 9.274748799 | 3.955704204 |
| CMTM7     | 112616 | 1369  | 26.27608881 | 25.71772402 | 33.79938841 | 27.35525175 |
| TAF11     | 6882   | 1599  | 22.49653882 | 22.29720423 | 25.63429875 | 15.44485383 |
| CTNBL1    | 56259  | 1897  | 18.96255434 | 23.37570072 | 24.94875411 | 21.87554924 |
| ZBED1     | 9189   | 4606  | 7.809805813 | 6.676272361 | 6.926617231 | 8.394249419 |
| CREBL2    | 1389   | 3748  | 9.597642896 | 9.572055028 | 9.245117626 | 11.82815395 |
| POLE2     | 5427   | 1861  | 19.3293743  | 11.73433805 | 21.4577216  | 3.154452996 |
| LRRC37BP1 | 147172 | 4607  | 7.808110609 | 6.142772078 | 7.429592216 | 3.69091046  |
| RNF145    | 153830 | 3632  | 9.847901819 | 12.63863796 | 10.1802955  | 9.474919246 |
| CLOCK     | 9575   | 5801  | 6.165760974 | 5.262554354 | 5.609007628 | 5.757759419 |
| TRMT11    | 60487  | 1967  | 18.18382278 | 9.969128753 | 17.50859995 | 7.615524077 |
| ZCCHC9    | 84240  | 1802  | 19.8488232  | 19.90902455 | 24.62253046 | 18.08604158 |
| EXOSC1    | 51013  | 1150  | 31.10224296 | 32.35918118 | 30.49849599 | 24.99556395 |
| RBM42     | 79171  | 1669  | 21.43054488 | 22.96418321 | 21.77410363 | 17.34411468 |
| NDUFA8    | 4702   | 859   | 41.63862562 | 35.27968001 | 39.60051988 | 25.92220597 |
| TIMM10    | 26519  | 684   | 52.29178276 | 43.65435637 | 62.39696169 | 25.45158218 |
| C15orf29  | 79768  | 2750  | 13.00639251 | 10.29081853 | 11.06363841 | 7.361049562 |
| LOC20218  | 202181 | 2857  | 12.51927876 | 10.13939413 | 10.50137771 | 4.95975513  |
| PGLS      | 25796  | 1043  | 34.29298122 | 63.88012727 | 38.0839263  | 35.90540714 |
| DNAJC12   | 56521  | 1218  | 29.36582874 | 19.02676454 | 26.36722802 | 9.97186517  |
| ARHGEF17  | 9828   | 7830  | 4.568017804 | 1.394482957 | 4.830136946 | 1.292649189 |
| FAM63B    | 54629  | 5013  | 7.094193744 | 6.623193702 | 5.816336938 | 7.10701773  |
| NFATC4    | 4776   | 5672  | 6.269956495 | 2.200040611 | 3.240792355 | 1.891524989 |
| ZW10      | 9183   | 2900  | 12.26317008 | 12.14053938 | 11.7299471  | 6.142668945 |
| MSL3      | 10943  | 3564  | 9.978449282 | 10.3788512  | 8.773890202 | 17.77784346 |
| SLC25A28  | 81894  | 1584  | 22.45151088 | 24.19647839 | 18.00722398 | 49.07366375 |
| RRS1      | 23212  | 1724  | 20.62830234 | 17.31994185 | 20.22156939 | 4.931561627 |
| COX18     | 285521 | 4523  | 7.86274447  | 6.306120638 | 6.11945694  | 4.475544173 |
| CDK2AP2   | 10263  | 1397  | 25.45683124 | 24.56423296 | 29.49214636 | 14.78006014 |

|          |        |      |             |             |             |             |
|----------|--------|------|-------------|-------------|-------------|-------------|
| PKMYT1   | 9088   | 2225 | 15.98345764 | 13.82063393 | 17.47253757 | 8.097154518 |
| RNASEH1  | 246243 | 1648 | 21.57960755 | 14.73832684 | 20.51308363 | 13.75730137 |
| THAP11   | 57215  | 1903 | 18.68796282 | 11.59245181 | 15.43278078 | 5.956918721 |
| ZNF740   | 283337 | 4256 | 8.356013449 | 11.57096413 | 6.801224696 | 10.32120847 |
| FXC1     | 26515  | 2861 | 12.43033668 | 16.74555303 | 12.84989461 | 9.693377919 |
| PGPEP1   | 54858  | 7084 | 5.020213614 | 8.430146741 | 5.42826462  | 10.83011562 |
| SHMT1    | 6470   | 2540 | 14.00125718 | 14.56308097 | 14.64020394 | 8.607211496 |
| BBS5     | 129880 | 3196 | 11.12740715 | 10.59779977 | 10.64356902 | 13.30102041 |
| C2orf69  | 205327 | 3742 | 9.449173456 | 6.550399605 | 8.751773921 | 4.652293483 |
| RAD51AP1 | 10635  | 2269 | 15.58343194 | 14.04366413 | 12.57093115 | 10.43815644 |
| MRPL46   | 26589  | 1020 | 34.66549713 | 30.14795147 | 31.6927142  | 22.62440233 |
| EMR2     | 30817  | 6771 | 5.22209527  | 7.240169937 | 10.64068876 | 16.3234617  |
| FAM49A   | 81553  | 4702 | 7.519950462 | 20.9942321  | 8.178185148 | 19.93291441 |
| LYSMD3   | 116068 | 4261 | 8.298241509 | 8.367338549 | 9.570044342 | 7.696192396 |
| TXNDC11  | 51061  | 3047 | 11.60446573 | 13.45625664 | 10.5399684  | 15.67876983 |
| NIF3L1   | 60491  | 1649 | 21.44257554 | 16.75636926 | 19.21935367 | 9.820684679 |
| RNF11    | 26994  | 3082 | 11.47268237 | 14.60486772 | 10.14605603 | 19.96702607 |
| GALNT6   | 11226  | 4520 | 7.822744927 | 6.211707584 | 7.245384516 | 6.762557147 |
| B4GALT2  | 8704   | 2227 | 15.78555047 | 7.004170603 | 11.29002542 | 0.908975586 |
| TMEM161  | 54929  | 1795 | 19.5846356  | 13.53134409 | 23.65918498 | 7.555840567 |
| DERA     | 51071  | 1741 | 20.19208553 | 23.55038139 | 18.4464582  | 16.27802459 |
| USP46    | 64854  | 8057 | 4.363214708 | 3.291186482 | 3.04195511  | 1.658223279 |
| TMEM63A  | 9725   | 4469 | 7.866283487 | 8.825550503 | 8.084514252 | 27.72129428 |
| ZNF507   | 22847  | 7730 | 4.547790544 | 4.064606539 | 4.701290938 | 3.27342922  |
| DSN1     | 79980  | 2441 | 14.40164724 | 14.05826852 | 16.87854505 | 6.717221589 |
| RHBDD1   | 84236  | 5169 | 6.801010041 | 7.113057261 | 5.559049631 | 6.070124542 |
| MGC2752  | 65996  | 3359 | 10.46574007 | 9.950849274 | 7.736834072 | 6.388049858 |
| SAP30L   | 79685  | 6287 | 5.591605043 | 4.820303026 | 4.704925496 | 4.314532788 |
| PRNP     | 5621   | 2755 | 12.76022537 | 7.117704631 | 16.33526467 | 6.686398014 |
| ZNF236   | 7776   | 8140 | 4.318724927 | 3.504002905 | 4.360668293 | 2.90960405  |
| TWSG1    | 57045  | 3779 | 9.302572348 | 5.719706383 | 5.255561675 | 4.713876671 |
| PLCB3    | 5331   | 5728 | 6.137294152 | 9.414369712 | 6.233785732 | 5.937159388 |
| CCR1     | 1230   | 2690 | 13.06855796 | 44.56653695 | 15.63035967 | 246.300992  |
| CRAMP1L  | 57585  | 7702 | 4.537786904 | 3.674337959 | 4.581219832 | 2.917372603 |
| CEP164   | 22897  | 5634 | 6.203414046 | 5.814058335 | 6.637806667 | 7.796780842 |
| NFATC2   | 4773   | 3254 | 10.7406376  | 13.62744446 | 12.72643308 | 17.1697499  |
| MPV17    | 4358   | 1051 | 33.25407682 | 35.61930641 | 29.55172209 | 22.92010913 |
| RPP30    | 10556  | 4272 | 8.181187906 | 6.467989913 | 10.97968563 | 4.92804348  |
| NAPG     | 8774   | 3729 | 9.372495236 | 7.947639332 | 9.348883246 | 7.70847373  |
| TMEM110  | 375346 | 4746 | 7.3641034   | 5.493346843 | 7.211995647 | 8.70111421  |
| DTWD1    | 56986  | 2750 | 12.70910354 | 9.237427658 | 12.44659321 | 2.723588338 |
| RRP15    | 51018  | 7782 | 4.491137848 | 3.83700588  | 4.669876504 | 1.664796611 |
| PTPRS    | 5802   | 7347 | 4.757048419 | 1.334509069 | 5.3489813   | 1.432734568 |
| C17orf62 | 79415  | 2437 | 14.34141762 | 28.71131022 | 16.4727553  | 53.82597587 |
| KLF16    | 83855  | 2904 | 12.03513593 | 10.28222443 | 12.95064997 | 5.228018155 |
| CASD1    | 64921  | 3898 | 8.966145391 | 10.69002361 | 9.322980748 | 7.374268481 |
| SLC25A33 | 84275  | 1476 | 23.67888532 | 18.72036105 | 20.61314745 | 14.67472109 |
| ABCF3    | 55324  | 2626 | 13.30922876 | 12.47387839 | 13.3561578  | 9.635798884 |
| HSDL2    | 84263  | 3393 | 10.30062916 | 10.83624904 | 9.65197112  | 13.72196831 |
| FAM190B  | 54462  | 7676 | 4.553157209 | 4.557677372 | 4.431585016 | 5.300703681 |
| OFD1     | 8481   | 3654 | 9.564869933 | 11.40386208 | 11.04416788 | 11.46764495 |
| VEGFB    | 7423   | 1172 | 29.82084875 | 34.22344987 | 29.56544442 | 39.03491726 |
| HDHD2    | 84064  | 2245 | 15.5679442  | 10.81904795 | 13.08177364 | 8.295525787 |
| RBMX2    | 51634  | 1528 | 22.87305938 | 21.72910342 | 25.0278415  | 19.20954524 |
| PLSCR1   | 5359   | 2228 | 15.68673013 | 18.70274329 | 9.577989631 | 170.3564264 |
| FCGR2A   | 2212   | 2429 | 14.3886516  | 12.01773639 | 21.39812733 | 70.2542328  |
| DBR1     | 51163  | 2690 | 12.91659798 | 18.88693387 | 13.98092473 | 19.64086737 |
| YIPF2    | 78992  | 1554 | 22.35884721 | 22.79948319 | 21.6179389  | 16.28288795 |
| IER3IP1  | 51124  | 1491 | 23.30358724 | 19.27928661 | 31.31719132 | 16.02052705 |
| C9orf167 | 54863  | 4069 | 8.539112452 | 15.71712473 | 10.22931875 | 22.78506248 |
| ZDHHC4   | 55146  | 1570 | 22.13098635 | 26.9670128  | 25.30034085 | 17.01949676 |
| POLR1E   | 64425  | 1854 | 18.74091077 | 12.3795936  | 14.47312011 | 1.746958904 |

|          |        |       |             |             |             |             |
|----------|--------|-------|-------------|-------------|-------------|-------------|
| SF3B5    | 83443  | 786   | 44.20565975 | 43.94283223 | 48.92344347 | 20.34590353 |
| THOC6    | 79228  | 1444  | 24.0620835  | 23.14743955 | 34.23866631 | 13.03731597 |
| PAPD5    | 64282  | 8114  | 4.282184936 | 2.279407547 | 4.296522754 | 3.118512185 |
| POLK     | 51426  | 4512  | 7.700719984 | 8.938988461 | 6.602648793 | 14.93989614 |
| DDX19B   | 11269  | 1831  | 18.97632363 | 13.99549904 | 19.61682656 | 13.93011291 |
| NCKAP5L  | 57701  | 4918  | 7.064995642 | 9.19785177  | 7.776035341 | 10.61948895 |
| THOC5    | 8563   | 2694  | 12.89741966 | 12.15902177 | 13.80331032 | 9.768282177 |
| COMMD2   | 51122  | 3724  | 9.330195641 | 6.821408717 | 10.26921101 | 6.63166522  |
| TTC21B   | 79809  | 4916  | 7.067869928 | 5.89264626  | 6.446849919 | 4.035400441 |
| RXRB     | 6257   | 2892  | 11.94372835 | 13.25284294 | 10.37428635 | 8.119553286 |
| DCUN1D2  | 55208  | 3046  | 11.33987603 | 9.802882389 | 12.00008658 | 6.845099437 |
| NSDHL    | 50814  | 1648  | 20.95950388 | 22.03988326 | 19.10280913 | 10.07230993 |
| TTBK2    | 146057 | 5635  | 6.129771499 | 5.615304567 | 4.424419138 | 5.172982478 |
| PRDM10   | 56980  | 6341  | 5.44728945  | 6.009208183 | 4.898101233 | 5.778209146 |
| STIM2    | 57620  | 5222  | 6.61456576  | 6.230098041 | 6.230917895 | 8.799569493 |
| C7orf11  | 136647 | 953   | 36.24476642 | 24.55134512 | 31.26038967 | 16.56815458 |
| AMMECR1  | 83607  | 4726  | 7.308773254 | 6.271000227 | 7.421343713 | 4.411801287 |
| ZNF277   | 11179  | 2687  | 12.85495437 | 11.19553868 | 12.81705102 | 12.88252161 |
| FAIM     | 55179  | 1538  | 22.45855813 | 4.056771894 | 20.60644617 | 1.184564218 |
| PRKAG1   | 5571   | 1854  | 18.63067012 | 25.48032857 | 21.76666096 | 18.56143835 |
| FEM1C    | 56929  | 5813  | 5.942071632 | 4.063351898 | 5.597428737 | 12.95433288 |
| XRCC6BP1 | 91419  | 1182  | 29.22272623 | 35.44208522 | 26.63403506 | 11.30313448 |
| EPG5     | 57724  | 12715 | 2.716575887 | 4.206043597 | 2.293141728 | 7.259737437 |
| KATNAL1  | 84056  | 7536  | 4.583500849 | 3.252600228 | 3.140113226 | 1.343078974 |
| ZMYM6    | 9204   | 5159  | 6.695340647 | 7.126844928 | 5.569825072 | 7.415982768 |
| GRHPR    | 9380   | 1235  | 27.96863352 | 25.07995399 | 34.9004788  | 11.14588071 |
| NCKIPSD  | 51517  | 3023  | 11.42615362 | 11.35171467 | 9.924722499 | 12.25421168 |
| ZNF281   | 23528  | 3535  | 9.771219915 | 9.707562504 | 13.62741884 | 19.46981992 |
| SPNS1    | 83985  | 2230  | 15.48935534 | 10.09242204 | 17.33861495 | 13.43474068 |
| FGD4     | 121512 | 8312  | 4.155589798 | 13.37746748 | 5.185525904 | 43.90991818 |
| PIAS3    | 10401  | 2902  | 11.90257147 | 6.680373388 | 9.537664968 | 4.952601402 |
| IFIT2    | 3433   | 3505  | 9.796541008 | 6.802595511 | 4.521071926 | 530.8776343 |
| TTC31    | 64427  | 2929  | 11.72307143 | 12.4007264  | 11.54167355 | 11.88725313 |
| ANKRD50  | 57182  | 8802  | 3.901031156 | 2.405033521 | 4.392764296 | 0.459961061 |
| TMEM160  | 54958  | 696   | 49.33459229 | 40.66056173 | 40.3748179  | 25.0127618  |
| RNF216P1 | 441191 | 2443  | 14.05520926 | 9.942186916 | 14.5296111  | 6.794583202 |
| PFDN4    | 5203   | 1383  | 24.82782085 | 16.91788279 | 24.74919114 | 11.12407345 |
| ENTPD4   | 9583   | 2966  | 11.57682948 | 13.59835332 | 10.68533857 | 19.31468922 |
| STAM2    | 10254  | 5701  | 6.022956715 | 6.058422406 | 5.336784009 | 9.267485219 |
| PRKRIP1  | 79706  | 2181  | 15.7436388  | 14.71247437 | 15.01565246 | 13.36531695 |
| EHD4     | 30844  | 2904  | 11.82399319 | 8.056966907 | 11.71379014 | 43.56681796 |
| BHLHE40  | 8553   | 3061  | 11.21753552 | 32.24922553 | 9.663465074 | 68.90913924 |
| NAA30    | 122830 | 4490  | 7.647411187 | 5.558409953 | 7.670248575 | 4.643691066 |
| DRG2     | 1819   | 1888  | 18.18690478 | 20.06438369 | 22.04613241 | 12.00849187 |
| SELPLG   | 6404   | 2638  | 13.01625331 | 36.99799694 | 17.86069059 | 14.96346788 |
| HERC2P7  | 1E+08  | 1779  | 19.30122329 | 16.65921702 | 21.02158671 | 7.851372425 |
| JUND     | 3727   | 1890  | 18.16765938 | 48.92886993 | 20.7931035  | 101.1073263 |
| PTBP2    | 58155  | 3498  | 9.816145292 | 7.198425779 | 8.758230531 | 6.423557401 |
| LARP1B   | 55132  | 3979  | 8.578157844 | 4.592178977 | 8.761494251 | 1.068360423 |
| FMR1     | 2332   | 4411  | 7.738039008 | 12.83144455 | 8.669812244 | 33.73049519 |
| PCGF6    | 84108  | 2248  | 15.18349202 | 9.813361116 | 15.60198861 | 5.583002448 |
| ACTR10   | 55860  | 2451  | 13.92594454 | 10.63705594 | 13.5339484  | 9.332705636 |
| ZER1     | 10444  | 4299  | 7.939634814 | 7.153038031 | 8.35506151  | 7.628163712 |
| GPAA1    | 8733   | 2105  | 16.21495965 | 30.6990397  | 18.87008795 | 20.19480343 |
| LMTK2    | 22853  | 8961  | 3.809004582 | 3.879243256 | 3.607473328 | 5.963756257 |
| GORASP1  | 64689  | 3057  | 11.16535494 | 12.31884976 | 12.44071215 | 14.17068259 |
| ATAD2B   | 54454  | 8066  | 4.231650144 | 4.641196508 | 5.081731181 | 5.571436595 |
| MRPS18A  | 55168  | 1207  | 28.27878216 | 25.66175905 | 26.78257538 | 32.87162978 |
| SNX20    | 124460 | 3304  | 10.3306568  | 8.565299928 | 8.505106919 | 13.66272289 |
| ZNF431   | 170959 | 3861  | 8.840323767 | 10.33075643 | 8.810372074 | 9.122668261 |
| ITGAM    | 3684   | 4745  | 7.193359339 | 53.01962088 | 9.128214137 | 68.1304308  |
| MTX1     | 4580   | 1632  | 20.78927935 | 18.43285076 | 24.72756705 | 21.70652636 |

|          |        |      |             |             |             |             |
|----------|--------|------|-------------|-------------|-------------|-------------|
| NOTCH2N1 | 388677 | 4962 | 6.837586436 | 9.340829993 | 4.38579815  | 5.670619095 |
| PEX14    | 5195   | 1945 | 17.44375522 | 15.46653596 | 15.64267642 | 16.23593965 |
| FBXW7    | 55294  | 3896 | 8.708445558 | 8.693677639 | 6.724668996 | 12.05428547 |
| TMTC3    | 160418 | 7203 | 4.710274038 | 3.774203462 | 4.311933905 | 3.259995572 |
| SPATS2   | 65244  | 3796 | 8.937856664 | 13.97106928 | 9.629152717 | 20.0509095  |
| PPCS     | 79717  | 1489 | 22.78583203 | 34.27043976 | 24.26440174 | 30.86054526 |
| E2F2     | 1870   | 5201 | 6.523380868 | 3.556068609 | 7.35292094  | 3.269375983 |
| HDAC8    | 55869  | 2422 | 14.00830053 | 11.13243388 | 12.21299199 | 10.28024366 |
| TIPIN    | 54962  | 1295 | 26.19930803 | 19.96030226 | 29.36776606 | 9.535259182 |
| RPL18A   | 6142   | 618  | 54.89984449 | 59.4941634  | 62.56490506 | 28.16971232 |
| DDA1     | 79016  | 4078 | 8.319790067 | 11.36566906 | 12.48642165 | 9.133622066 |
| ZCCHC24  | 219654 | 4933 | 6.877783072 | 13.82258292 | 6.938603556 | 8.986807417 |
| DEF8     | 54849  | 3724 | 9.110661626 | 18.60928167 | 9.361435452 | 21.74316466 |
| ELL      | 8178   | 4077 | 8.321830732 | 9.564807415 | 7.514420014 | 14.34926205 |
| LPIN2    | 9663   | 6245 | 5.432842898 | 6.993627896 | 6.394366677 | 16.79073675 |
| DHX57    | 90957  | 4845 | 7.002704622 | 7.12880622  | 7.326282747 | 3.927412408 |
| ETAA1    | 54465  | 3298 | 10.28747844 | 10.6754288  | 10.44251549 | 5.524135132 |
| COG4     | 25839  | 2838 | 11.95493442 | 16.56719397 | 12.35844622 | 16.83340791 |
| BEND3    | 57673  | 6660 | 5.06362128  | 2.442460358 | 4.66349248  | 1.154999518 |
| AP1AR    | 55435  | 2911 | 11.58492536 | 5.664589032 | 12.48401888 | 8.066557232 |
| POP7     | 10248  | 949  | 35.53605661 | 25.35925179 | 42.52411952 | 11.09199249 |
| UQCR11   | 10975  | 1335 | 25.26121178 | 35.88691177 | 24.0563923  | 26.68725085 |
| CASZ1    | 54897  | 7938 | 4.248389736 | 2.863307363 | 3.433576999 | 2.091101885 |
| C19orf56 | 51398  | 861  | 39.16808098 | 37.00937737 | 39.263138   | 23.98111965 |
| ARL8A    | 127829 | 2345 | 14.3811163  | 30.21782249 | 15.58731928 | 42.29856838 |
| UTP23    | 84294  | 3693 | 9.131794673 | 8.085453495 | 9.096744397 | 4.714021721 |
| PHTF1    | 10745  | 3244 | 10.39572063 | 12.08956613 | 10.87686657 | 14.28983034 |
| DCTN6    | 10671  | 1126 | 29.95001574 | 24.3414034  | 27.77099883 | 25.88788301 |
| WDR55    | 54853  | 2580 | 13.07120842 | 17.10111302 | 14.33133071 | 19.0659743  |
| C17orf39 | 79018  | 4232 | 7.968742374 | 5.160114155 | 8.387485801 | 4.639791991 |
| LZTFL1   | 54585  | 3398 | 9.924578495 | 5.770828798 | 8.394185634 | 2.382917751 |
| CEP57L1  | 285753 | 2915 | 11.56902838 | 7.185685203 | 7.465636508 | 2.986086143 |
| TMEM115  | 11070  | 2178 | 15.48380061 | 12.78883636 | 14.06624903 | 11.24604794 |
| MTFMT    | 123263 | 2763 | 12.20547149 | 10.40369755 | 11.6233383  | 5.201755074 |
| VAR52    | 57176  | 3629 | 9.292840377 | 10.31575945 | 8.849623513 | 3.067949149 |
| SH2B1    | 25970  | 4876 | 6.916266966 | 12.29327157 | 6.759725753 | 10.91853793 |
| UBIAD1   | 29914  | 3687 | 9.146655201 | 5.439365779 | 8.996937221 | 2.525556739 |
| TM9SF1   | 10548  | 2449 | 13.68694633 | 14.83124851 | 15.18420498 | 12.64663782 |
| CYBASC3  | 220002 | 3214 | 10.42916352 | 10.05312361 | 10.45248197 | 6.1093963   |
| DPH2     | 1802   | 2513 | 13.33837308 | 8.86719796  | 17.8242616  | 5.155370963 |
| CEPT1    | 10390  | 2251 | 14.89086253 | 12.47308675 | 15.86278306 | 19.69432296 |
| RUNDC1   | 146923 | 3844 | 8.719909355 | 9.564878507 | 9.893667285 | 11.95404576 |
| VRK3     | 51231  | 2129 | 15.74416701 | 15.49048255 | 12.20668184 | 18.63600617 |
| DCLRE1C  | 64421  | 4108 | 8.159525696 | 12.47602665 | 7.766309388 | 19.95708118 |
| SLC30A6  | 55676  | 4965 | 6.751124181 | 7.71948072  | 7.234322141 | 5.667192739 |
| SCAMP4   | 113178 | 2548 | 13.15515367 | 19.06496282 | 15.17469047 | 14.4592045  |
| FOXJ2    | 55810  | 5499 | 6.095532198 | 4.254852136 | 6.224428322 | 4.56468067  |
| PRSS21   | 10942  | 1165 | 28.77195842 | 21.80508675 | 21.58187691 | 12.51062501 |
| SERPINE2 | 5270   | 2259 | 14.83812818 | 9.568291465 | 9.072431099 | 3.136348032 |
| CLU      | 1191   | 3012 | 11.12859614 | 1.183706161 | 10.87288779 | 1.881808819 |
| NME2     | 4831   | 846  | 39.62095929 | -           | 33.96539899 | 9.0925494   |
| MRPL22   | 29093  | 3190 | 10.50762745 | 7.33461815  | 11.25968948 | 4.949671257 |
| TMEM11   | 8834   | 1688 | 19.85742391 | 20.72555184 | 18.27462983 | 17.50865758 |
| PTGER4   | 5734   | 3432 | 9.766705    | 2.726973415 | 5.848500096 | 6.311156275 |
| C2orf43  | 60526  | 2876 | 11.65484407 | 10.84720997 | 11.46050861 | 5.419687916 |
| USP54    | 159195 | 6202 | 5.40460038  | 4.455216528 | 5.82549084  | 2.088914419 |
| ZNF430   | 80264  | 3919 | 8.553031783 | 10.57588144 | 9.111284682 | 11.20874286 |
| LIN9     | 286826 | 3340 | 9.974534548 | 10.07417227 | 8.856247482 | 5.091025296 |
| PLEKHO2  | 80301  | 3738 | 8.912505455 | 28.13724644 | 13.11344693 | 91.19588155 |
| CBWD1    | 55871  | 1838 | 18.12565038 | 15.76074484 | 19.54211612 | 13.32638325 |
| IFT80    | 57560  | 4542 | 7.334862482 | 7.310011014 | 6.838146174 | 4.947072609 |
| CCRN4L   | 25819  | 1971 | 16.90255981 | 15.149457   | 13.29239493 | 6.470328953 |

|          |        |      |             |             |             |             |
|----------|--------|------|-------------|-------------|-------------|-------------|
| TMEM9    | 252839 | 1557 | 21.39688208 | 11.01998505 | 17.91238825 | 8.580799586 |
| DDX60    | 55601  | 6099 | 5.462361927 | 7.672546941 | 3.637465149 | 62.66366507 |
| MND1     | 84057  | 941  | 35.40376768 | 20.36515503 | 39.74219209 | 6.453630062 |
| COMMD9   | 29099  | 3006 | 11.08281616 | 10.74874893 | 13.70609729 | 9.495166226 |
| GCDH     | 2639   | 1839 | 18.11579412 | 11.75354563 | 18.03790513 | 5.723926522 |
| RBMXL1   | 494115 | 5128 | 6.496674218 | 6.083575636 | 5.521091658 | 6.868686068 |
| GYPC     | 2995   | 1075 | 30.99064688 | 49.33411997 | 32.822842   | 15.44108536 |
| CCNG2    | 901    | 5489 | 6.069401602 | 4.912143351 | 7.236570438 | 9.256630461 |
| QTRT1    | 81890  | 1352 | 24.6412318  | 24.06329288 | 25.62921661 | 8.234901969 |
| YARS2    | 51067  | 2173 | 15.33131403 | 14.76663903 | 16.33494704 | 6.800417393 |
| IFT172   | 26160  | 5430 | 6.135349059 | 4.596180606 | 5.136204144 | 1.192950942 |
| ZNF587   | 84914  | 6946 | 4.79627777  | 6.544466986 | 5.536110937 | 5.478926898 |
| C1orf31  | 388753 | 710  | 46.63459045 | 29.50179206 | 39.8762789  | 27.65577423 |
| SNAP29   | 9342   | 4277 | 7.74153828  | 7.710834076 | 8.941440684 | 7.430753211 |
| FEZ2     | 9637   | 2110 | 15.69220816 | 12.6729489  | 13.51821933 | 12.37598262 |
| IMPA1    | 3612   | 3597 | 9.205048436 | 9.168539711 | 8.810874118 | 11.03031892 |
| CHCHD4   | 131474 | 1646 | 20.1157711  | 20.30674527 | 19.38274542 | 7.378937896 |
| FAM117B  | 150864 | 5795 | 5.713642661 | 2.499417517 | 5.870033922 | 1.117812531 |
| PNPLA8   | 50640  | 3548 | 9.332175655 | 10.30004518 | 9.82581331  | 13.80715469 |
| USP38    | 84640  | 5195 | 6.373543643 | 9.179248226 | 7.076717705 | 9.819455912 |
| ACSS2    | 55902  | 3027 | 10.93840741 | 21.56920272 | 10.12100773 | 23.60666952 |
| PYROXD1  | 79912  | 4136 | 8.005454358 | 8.243085291 | 8.582166322 | 8.320335276 |
| TMEM184  | 55751  | 2986 | 11.08859987 | 10.89536905 | 12.52424741 | 11.66033638 |
| MAN1B1   | 11253  | 2737 | 12.09739102 | 14.08478424 | 15.67073678 | 11.24193905 |
| PDE1B    | 5153   | 3463 | 9.561235698 | 19.30401543 | 11.95836362 | 41.56134033 |
| GPR108   | 56927  | 2076 | 15.94920965 | 21.03815328 | 17.50528851 | 25.4498715  |
| SFXN2    | 118980 | 2562 | 12.84393952 | 9.13248708  | 14.92683131 | 1.896289114 |
| USP21    | 27005  | 2358 | 13.95512004 | 13.0410986  | 13.70931658 | 6.867815537 |
| FAM195B  | 348262 | 1252 | 26.28288583 | 26.51922526 | 22.10727136 | 18.27033667 |
| CCDC125  | 202243 | 3624 | 9.080069828 | 10.32999201 | 8.803531723 | 9.830982307 |
| SEPW1    | 6415   | 893  | 36.84901798 | 46.16354611 | 43.06139593 | 44.8834433  |
| MIEN1    | 84299  | 781  | 42.13338419 | 46.22137635 | 37.60381796 | 44.3218125  |
| STAMBPL1 | 57559  | 2010 | 16.37123038 | 8.203790384 | 13.77030037 | 7.049761396 |
| C17orf81 | 23587  | 2184 | 15.06692905 | 14.48820569 | 16.73638449 | 10.38096733 |
| TRAF2    | 7186   | 2298 | 14.31948349 | 11.15133105 | 14.71086241 | 7.399488463 |
| CENPO    | 79172  | 4125 | 7.977254074 | 5.726124747 | 8.451390454 | 3.53330379  |
| ZFYVE16  | 9765   | 7224 | 4.555118086 | 4.380155209 | 4.913599101 | 9.387274237 |
| FRA10AC1 | 118924 | 3089 | 10.65269442 | 9.954972643 | 9.712669509 | 5.897895004 |
| NAGA     | 4668   | 3726 | 8.831501088 | 18.1806592  | 5.84066839  | 12.44128009 |
| PRKAB2   | 5565   | 5431 | 6.058952873 | 3.938857988 | 4.55170633  | 2.161825456 |
| CLCN3    | 1182   | 4058 | 8.108963296 | 9.774326733 | 10.20498108 | 10.97445782 |
| CETN3    | 1070   | 997  | 33.00518862 | 22.35031943 | 25.64238327 | 13.40050647 |
| LOC38990 | 389906 | 1791 | 18.37307262 | 10.9487863  | 19.58306554 | 5.31220355  |
| MAP3K5   | 4217   | 5215 | 6.309908544 | 6.024814679 | 5.023837087 | 8.889014308 |
| EFCAB4B  | 84766  | 2795 | 11.77322828 | 11.87909482 | 8.542103053 | 5.069774743 |
| LOC73127 | 731275 | 3834 | 8.58272641  | 12.55395407 | 7.384496093 | 17.05386613 |
| TTC15    | 51112  | 2546 | 12.92465556 | 14.44123841 | 10.62232893 | 12.24432243 |
| WDR13    | 64743  | 2485 | 13.15967279 | 12.82296737 | 14.11399211 | 11.48590329 |
| SP4      | 6671   | 5811 | 5.627566148 | 4.256483911 | 4.144977249 | 3.622887928 |
| CDS2     | 8760   | 9323 | 3.507646346 | 7.289924793 | 5.461721279 | 6.427002406 |
| RPAIN    | 84268  | 2807 | 11.65008439 | 9.446772171 | 11.89276533 | 6.490415984 |
| TBC1D13  | 54662  | 3879 | 8.430468391 | 11.89130336 | 9.205239667 | 8.975964019 |
| TXNDC9   | 10190  | 1556 | 21.01657255 | 18.33070928 | 24.03432054 | 20.68521157 |
| MPP6     | 51678  | 2201 | 14.85769509 | 6.985667991 | 11.51938726 | 1.195627087 |
| TPRKB    | 51002  | 752  | 43.48641873 | 29.33568589 | 38.49203764 | 19.6506742  |
| ZNF138   | 7697   | 2719 | 12.02713751 | 7.785621571 | 9.71334872  | 6.849376753 |
| C7orf40  | 285958 | 837  | 39.07023523 | 29.55128794 | 30.03929104 | 14.99473059 |
| SUGP1    | 57794  | 2101 | 15.56486763 | 14.74238133 | 17.29699141 | 24.18355288 |
| SMG9     | 56006  | 2371 | 13.79240274 | 15.13119454 | 11.58457148 | 9.391469812 |
| TNFSF13B | 10673  | 2675 | 12.22496706 | 16.16057601 | 5.607931984 | 140.2245544 |
| INTS5    | 80789  | 3300 | 9.90963239  | 8.778257278 | 11.46059766 | 6.808970845 |
| FBXO21   | 23014  | 4248 | 7.698160755 | 7.291370805 | 6.067971018 | 6.861995354 |

|           |        |       |             |             |             |             |
|-----------|--------|-------|-------------|-------------|-------------|-------------|
| WDR62     | 284403 | 4746  | 6.890389146 | 4.131748053 | 7.790736038 | 1.023660495 |
| PANK2     | 80025  | 2280  | 14.34288899 | 14.66004505 | 16.58770714 | 23.35034691 |
| DECR1     | 1666   | 1251  | 26.1405171  | 33.13099869 | 28.54286544 | 61.48918299 |
| JAZF1     | 221895 | 3210  | 10.18747255 | 6.941828185 | 13.42744278 | 8.324177542 |
| IGSF8     | 93185  | 2374  | 13.68887983 | 2.346595248 | 11.56993217 | 2.472804139 |
| STRADB    | 55437  | 2328  | 13.95936457 | 9.763287734 | 14.70280556 | 5.652008631 |
| C11orf10  | 746    | 420   | 77.37476362 | 74.27756158 | 85.0169635  | 55.90892405 |
| CCDC12    | 151903 | 893   | 36.3912662  | 30.19345448 | 33.36075179 | 21.53498542 |
| PSD3      | 23362  | 11687 | 2.780645223 | 0.381334277 | 2.332141201 | 0.640871732 |
| PKNOX1    | 5316   | 4997  | 6.503382173 | 5.930907959 | 6.553759858 | 4.537128807 |
| AHDC1     | 27245  | 6512  | 4.990387088 | 2.669064713 | 5.288608124 | 2.642268635 |
| SNX30     | 401548 | 7616  | 4.266990641 | 3.306209739 | 4.799404374 | 4.677977925 |
| GGH       | 8836   | 1505  | 21.59295729 | 26.50302363 | 30.74509152 | 8.87727904  |
| TRIM5     | 85363  | 3659  | 8.881497873 | 7.247086495 | 6.929262466 | 52.00413533 |
| UNC50     | 25972  | 1167  | 27.84695863 | 19.28543373 | 28.24372131 | 20.98876814 |
| CLEC2D    | 29121  | 5361  | 6.061816959 | 2.660192468 | 5.005253627 | 2.983003203 |
| PDE7A     | 5150   | 3295  | 9.862640582 | 11.36142368 | 11.92684844 | 7.126478939 |
| ZNF333    | 84449  | 3767  | 8.62686507  | 7.275927853 | 6.506246965 | 7.254551765 |
| IL27RA    | 9466   | 3258  | 9.974647243 | 7.318323286 | 9.727659363 | 4.597831755 |
| UCLL1     | 54963  | 2113  | 15.37974478 | 11.70583436 | 13.09905525 | 6.227106527 |
| SSBP4     | 170463 | 1817  | 17.88519577 | 26.2444659  | 19.76797437 | 16.7112435  |
| MTUS1     | 57509  | 6435  | 5.01833948  | 0.207769403 | 2.593861095 | 0.377489721 |
| TRUB2     | 26995  | 1439  | 22.44128878 | 22.29875372 | 22.7582613  | 9.847130234 |
| PHF11     | 51131  | 1649  | 19.58339269 | 28.51285414 | 13.83793464 | 65.30755312 |
| SLC35D1   | 23169  | 6475  | 4.987338155 | 5.850433422 | 5.318828742 | 2.594841023 |
| CCDC112   | 153733 | 2552  | 12.65400257 | 3.405358427 | 9.603852789 | 6.583697345 |
| C10orf12  | 26148  | 4565  | 7.074044809 | 13.71653547 | 7.173962324 | 11.61804208 |
| SLC25A19  | 60386  | 1675  | 19.27941167 | 8.248135196 | 18.29032263 | 6.163505678 |
| AFAP1-AS1 | 84740  | 6810  | 4.7419992   | 9.161989975 | 3.598976846 | 5.142465975 |
| ZNF337    | 26152  | 3264  | 9.893693183 | 8.124108298 | 7.185235451 | 3.721118804 |
| AHI1      | 54806  | 5649  | 5.716589582 | 4.181317858 | 5.049290633 | 2.54424664  |
| PLCB2     | 5330   | 4694  | 6.879636675 | 134.5825865 | 8.642239919 | 143.9082053 |
| MYO1D     | 4642   | 5182  | 6.231766606 | 4.515135449 | 3.873418049 | 2.812597092 |
| TRANK1    | 9881   | 10499 | 3.07581813  | 3.671783452 | 2.978392674 | 27.41726289 |
| C1orf38   | 9473   | 2723  | 11.85935165 | 67.59449049 | 11.94926671 | 109.8750861 |
| PRIM2     | 5558   | 2353  | 13.72418808 | 13.44761633 | 14.09762326 | 8.6030116   |
| ST3GAL1   | 6482   | 6971  | 4.632479494 | 4.539125123 | 5.789038792 | 13.88050445 |
| MITD1     | 129531 | 963   | 33.53376381 | 34.9405352  | 36.20143886 | 33.00242106 |
| MKL2      | 57496  | 8680  | 3.720393381 | 3.106308163 | 4.795287787 | 3.241660363 |
| POGLUT1   | 56983  | 3695  | 8.739652111 | 9.709353787 | 10.57853338 | 7.615050596 |
| SESTD1    | 91404  | 10448 | 3.090832174 | 3.092528645 | 2.487368458 | 2.421861396 |
| ADAT1     | 23536  | 3603  | 8.906086146 | 9.338810823 | 7.9165814   | 7.865678827 |
| C12orf47  | 51275  | 2285  | 14.04316341 | 8.386700607 | 12.76030506 | 4.783876849 |
| SHISA9    | 729993 | 6738  | 4.762337249 | 5.489793064 | 4.32729253  | 6.579388689 |
| SPICE1    | 152185 | 5464  | 5.872735795 | 5.831821727 | 5.684271581 | 3.14905808  |
| CSTA      | 1475   | 838   | 38.29191931 | 37.49332762 | 37.81946802 | 34.06022634 |
| CWF19L2   | 143884 | 3285  | 9.768227818 | 9.42884115  | 9.454751878 | 9.921171061 |
| RBM15     | 64783  | 3450  | 9.301051705 | 7.686112894 | 8.635116334 | 7.099678962 |
| ATE1      | 11101  | 2224  | 14.4283401  | 12.12354085 | 11.97026975 | 8.73793653  |
| ANKRD13C  | 81573  | 5682  | 5.647417878 | 4.706075707 | 5.4289995   | 5.700214374 |
| MBLAC2    | 153364 | 4300  | 7.462471717 | 5.285798568 | 6.78076676  | 1.647676791 |
| SRXN1     | 140809 | 2580  | 12.43745286 | 12.86901939 | 12.20210444 | 22.43978868 |
| PRRT4     | 401399 | 3562  | 9.008598648 | 1.251166113 | 5.813000172 | 0.056830113 |
| RNF14     | 9604   | 4395  | 7.301166868 | 8.619239228 | 6.634197285 | 6.448245919 |
| OBFC1     | 79991  | 6483  | 4.949657316 | 4.571455664 | 5.703352343 | 2.216944203 |
| SNX18     | 112574 | 5382  | 5.962212632 | 8.23926129  | 4.357600987 | 10.53141613 |
| TSPYL2    | 64061  | 2833  | 11.32673081 | 6.685767103 | 7.681726234 | 6.430849864 |
| RAB24     | 53917  | 1612  | 19.90609701 | 19.49094823 | 17.03909366 | 31.77078308 |
| ABHD13    | 84945  | 5316  | 6.036235587 | 7.545124766 | 8.465698678 | 8.872446401 |
| GPR180    | 160897 | 8895  | 3.607490543 | 3.406997766 | 4.916913502 | 9.740253327 |
| FXN       | 2395   | 7176  | 4.471659474 | 4.067876491 | 3.886508988 | 1.748967322 |
| FAM21C    | 253725 | 4654  | 6.894849244 | 9.04928608  | 8.307931098 | 12.17878849 |

|          |        |       |             |             |             |             |
|----------|--------|-------|-------------|-------------|-------------|-------------|
| EVI2A    | 2123   | 3010  | 10.5927715  | 16.43483588 | 14.24943739 | 87.22599178 |
| SSX2IP   | 117178 | 6025  | 5.291990409 | 5.399762983 | 6.803193976 | 2.956637334 |
| STX2     | 2054   | 3469  | 9.191191183 | 3.404477455 | 7.796036164 | 1.750609942 |
| SAV1     | 60485  | 3031  | 10.51938047 | 9.851395498 | 9.549987564 | 16.89689948 |
| ZNF202   | 7753   | 4055  | 7.862945059 | 5.220494464 | 5.418894003 | 2.096673796 |
| C1orf63  | 57035  | 1482  | 21.51433348 | 33.22943544 | 27.37292455 | 41.38727765 |
| FLAD1    | 80308  | 2260  | 14.10807178 | 13.21220343 | 14.95821319 | 11.55456784 |
| ZNF675   | 171392 | 2209  | 14.43379005 | 17.85485976 | 9.756018859 | 15.76177656 |
| HIGD2A   | 192286 | 628   | 50.77108633 | 64.57889908 | 57.53136018 | 42.87108085 |
| TP53RK   | 112858 | 3384  | 9.422057392 | 6.716588015 | 8.179167771 | 6.041759799 |
| NCOA7    | 135112 | 6558  | 4.861885059 | 4.553153363 | 3.608400926 | 41.11546896 |
| MTMR3    | 8897   | 9008  | 3.539547315 | 5.392709289 | 3.189912028 | 10.33717551 |
| PON2     | 5445   | 1669  | 19.10380001 | 22.56364513 | 19.11563749 | 7.641113461 |
| SQRDL    | 58472  | 1682  | 18.95614876 | 51.2700648  | 24.49496342 | 141.652064  |
| ORC5     | 5001   | 1968  | 16.20134259 | 13.81381481 | 16.7481823  | 7.6116544   |
| ITGAX    | 3687   | 4666  | 6.833313805 | 31.28062763 | 10.27896289 | 121.6048227 |
| TMEM8A   | 58986  | 3656  | 8.721072816 | 10.1176766  | 9.188806635 | 13.34391575 |
| HOMER1   | 9456   | 4228  | 7.541211498 | 3.583874778 | 9.294930372 | 13.54951945 |
| LOC14772 | 147727 | 2032  | 15.69106408 | 13.26907227 | 12.47744654 | 5.379507185 |
| MRPL13   | 28998  | 1119  | 28.49351404 | 25.09107978 | 31.53222086 | 18.4519607  |
| MPP5     | 64398  | 5375  | 5.93195204  | 4.809040266 | 6.99696512  | 8.436105172 |
| AGBL5    | 60509  | 3254  | 9.798476403 | 9.587146854 | 11.55767902 | 4.354646714 |
| ROGDI    | 79641  | 1474  | 21.49243965 | 39.1544541  | 20.35443427 | 21.83594926 |
| RGS14    | 10636  | 2418  | 13.10167744 | 15.66648321 | 13.36913502 | 13.31107908 |
| MRPL2    | 51069  | 1292  | 24.52001242 | 21.04147642 | 26.49236172 | 12.69097361 |
| SLC35A1  | 10559  | 1918  | 16.51713037 | 16.26515947 | 13.32922634 | 12.87607992 |
| COX10    | 1352   | 3016  | 10.50393105 | 10.63922633 | 11.90928695 | 7.785725498 |
| JAGN1    | 84522  | 1660  | 19.08425063 | 19.0615911  | 18.96471653 | 13.77979609 |
| FAM83D   | 81610  | 2445  | 12.95699634 | 9.569501799 | 11.7524448  | 2.980547675 |
| FZD3     | 7976   | 13804 | 2.294976532 | 1.210696273 | 2.938762256 | 0.938528487 |
| MRPL14   | 64928  | 791   | 40.05038691 | 32.67837096 | 46.74441623 | 33.78079635 |
| RFX1     | 5989   | 4392  | 7.213081978 | 6.291268877 | 5.676594226 | 4.977758925 |
| NCK1     | 4690   | 1961  | 16.15494954 | 12.04500999 | 16.26924985 | 11.04532807 |
| CEP78    | 84131  | 2767  | 11.44917096 | 8.455884314 | 11.83561186 | 3.292121009 |
| PHF1     | 5252   | 2312  | 13.70235988 | 11.85485304 | 11.14910938 | 15.67247685 |
| NEDD4L   | 23327  | 8473  | 3.738918452 | 1.814641242 | 2.468687758 | 2.006848163 |
| ATP5D    | 513    | 1005  | 31.52224482 | 38.13653908 | 34.05784213 | 16.91942735 |
| TNFAIP2  | 7127   | 4180  | 7.57891293  | 126.822717  | 8.138001574 | 233.8586075 |
| NFU1     | 27247  | 1181  | 26.82460292 | 37.17022768 | 27.0143937  | 22.28260134 |
| EMG1     | 10436  | 1072  | 29.55210452 | 24.94395725 | 34.29435492 | 10.57464209 |
| SNHG6    | 641638 | 472   | 67.11833908 | 80.25753476 | 77.88887389 | 47.17621806 |
| PEX1     | 5189   | 4390  | 7.21636812  | 6.598689981 | 6.738010613 | 4.011688172 |
| RGL2     | 5863   | 3425  | 9.249593006 | 13.59767332 | 10.36374888 | 13.77107301 |
| SLC35A5  | 55032  | 2958  | 10.70989048 | 11.90248958 | 12.07137413 | 16.08207667 |
| AHCYL2   | 23382  | 5075  | 6.242336167 | 6.366648135 | 5.953442537 | 4.626945439 |
| FHL3     | 2275   | 1738  | 18.11016679 | 14.87260727 | 24.79982239 | 36.92172011 |
| USF1     | 7391   | 1831  | 17.1903167  | 31.27689786 | 16.03964054 | 55.72045163 |
| ELP2     | 55250  | 2494  | 12.6204771  | 9.560183347 | 14.57136285 | 5.356978731 |
| CDK11B   | 984    | 2533  | 12.42616261 | 12.7559176  | 12.51192823 | 11.74774688 |
| MANEA    | 79694  | 4593  | 6.852921811 | 5.385244504 | 6.900220815 | 5.597314521 |
| XPNPEP3  | 63929  | 8027  | 3.921199686 | 2.914841398 | 4.81688194  | 2.093135122 |
| LRWD1    | 222229 | 2220  | 14.17813958 | 12.24576015 | 14.56151734 | 10.30381149 |
| KIAA0415 | 9907   | 5519  | 5.703111049 | 8.882621968 | 6.3550046   | 12.14059678 |
| NUDT4    | 11163  | 4813  | 6.53967793  | 5.046491302 | 4.916661806 | 4.332053373 |
| RNF8     | 9025   | 5639  | 5.581746742 | 5.374223289 | 4.496217656 | 4.523148915 |
| BRE      | 9577   | 1932  | 16.29165108 | 16.147296   | 19.35683373 | 10.05857704 |
| RNF166   | 115992 | 2465  | 12.7689533  | 25.40202207 | 11.99994588 | 19.95546195 |
| ITGB3BP  | 23421  | 1136  | 27.70727982 | 24.32328601 | 31.99029838 | 11.76083183 |
| TTC35    | 9694   | 1268  | 24.82292577 | 22.14268003 | 24.66099738 | 23.78698784 |
| ERCC1    | 2067   | 3400  | 9.257491141 | 8.323456165 | 7.208538917 | 5.715638483 |
| ZNF182   | 7569   | 3669  | 8.578759847 | 7.288068185 | 8.119692383 | 5.793139986 |
| FCHO1    | 23149  | 3235  | 9.729666114 | 8.059172833 | 11.82149669 | 9.198467652 |

|           |        |       |              |             |             |             |
|-----------|--------|-------|--------------|-------------|-------------|-------------|
| C7orf60   | 154743 | 3969  | 7.930327508  | 7.467056455 | 8.144764043 | 10.91453179 |
| RHOC      | 389    | 1415  | 22.24414832  | 18.58251364 | 23.14426715 | 55.36393637 |
| ANKS6     | 203286 | 7147  | 4.404011456  | 5.300343698 | 3.074522902 | 6.599401857 |
| GLRX      | 2745   | 1661  | 18.82666087  | 37.69776304 | 23.02380602 | 178.0545267 |
| GK        | 2710   | 4590  | 6.812872268  | 6.262617937 | 5.385689995 | 20.11057985 |
| FDX1L     | 112812 | 852   | 36.7031499   | 26.15407098 | 32.7342588  | 27.08555209 |
| TBCK      | 93627  | 3541  | 8.831144793  | 9.691113654 | 9.666233081 | 9.775581916 |
| TFB2M     | 64216  | 1799  | 17.38248122  | 12.63420447 | 19.73087266 | 3.713258742 |
| ANAPC2    | 29882  | 2733  | 11.44203575  | 10.5178984  | 13.06517551 | 8.962273113 |
| C7orf59   | 389541 | 613   | 51.01318713  | 65.06859799 | 42.05014826 | 56.79896318 |
| PTMS      | 5763   | 1150  | 27.1922467   | 23.44587379 | 32.51948066 | 22.00313728 |
| GTF2E1    | 2960   | 3033  | 10.31028147  | 9.991838155 | 10.37963384 | 9.210413151 |
| MAP2K5    | 5607   | 2385  | 13.1115655   | 9.810243982 | 14.26282875 | 9.166590021 |
| ACVR2B    | 93     | 11373 | 2.749589705  | 1.8025681   | 3.102484406 | 1.530720321 |
| SLC6A8    | 6535   | 3580  | 8.734939584  | 13.75587244 | 24.1974168  | 65.13912015 |
| OGFRL1    | 79627  | 1755  | 17.81828132  | 18.41067766 | 19.14203821 | 40.25508443 |
| RELL1     | 768211 | 3622  | 8.633650942  | 21.84031007 | 7.875053226 | 11.73662651 |
| METTL2B   | 55798  | 2192  | 14.26600534  | 10.57235366 | 13.01251952 | 6.2797275   |
| RNF2      | 6045   | 3551  | 8.806275334  | 6.212457277 | 9.758012071 | 8.265892742 |
| ALG5      | 29880  | 1227  | 25.4858058   | 26.69633631 | 27.72359134 | 14.35314676 |
| POLR3B    | 55703  | 4286  | 7.296099792  | 5.043110224 | 5.619799999 | 2.550433644 |
| BROX      | 148362 | 1686  | 18.54749924  | 22.99696746 | 17.92035639 | 29.65594849 |
| SAP30BP   | 29115  | 2519  | 12.33294861  | 11.41143959 | 13.25247808 | 14.46494455 |
| KIAA0240  | 23506  | 6520  | 4.764830911  | 5.639170703 | 4.407166801 | 5.805858493 |
| USP40     | 55230  | 5623  | 5.524932873  | 5.270629036 | 4.696886923 | 4.968021179 |
| WBP4      | 11193  | 2354  | 13.19740762  | 11.64333909 | 16.96381474 | 13.67297757 |
| ZNF614    | 80110  | 4676  | 6.64386175   | 4.574836984 | 6.868110292 | 3.116954263 |
| PLEKHA8   | 84725  | 7851  | 3.957037007  | 3.036950359 | 3.067948388 | 2.733086164 |
| NSUN4     | 387338 | 4465  | 6.957826997  | 9.332522295 | 7.997116387 | 5.757775049 |
| ALG9      | 79796  | 6435  | 4.827769626  | 4.744068036 | 5.647393777 | 3.051375246 |
| PDIA5     | 10954  | 1873  | 16.58659773  | 11.65915809 | 13.98788596 | 5.295789794 |
| RNF13     | 11342  | 2965  | 10.47780693  | 11.12284565 | 10.97398086 | 35.36531231 |
| DPH5      | 51611  | 1828  | 16.99491113  | 12.06807209 | 15.71921638 | 3.765088261 |
| IPO13     | 9670   | 4041  | 7.68787368   | 7.334013133 | 7.738219421 | 4.959281721 |
| C19orf22  | 91300  | 1835  | 16.9300804   | 17.12229349 | 17.50151702 | 18.75362763 |
| LMF2      | 91289  | 2617  | 11.871111102 | 11.75044344 | 11.86811613 | 9.668936901 |
| HEBP1     | 50865  | 1221  | 25.44365073  | 11.31500938 | 18.51553601 | 10.9421007  |
| DLG5      | 9231   | 7493  | 4.146096029  | 1.516677822 | 3.073540503 | 0.783456163 |
| HPS4      | 89781  | 4539  | 6.844392497  | 4.712918646 | 5.585849606 | 3.657009641 |
| SELRC1    | 65260  | 2114  | 14.6956942   | 9.908359681 | 16.39106001 | 4.500547095 |
| RGS12     | 6002   | 6240  | 4.978637427  | 2.571146362 | 4.571064549 | 0.843453596 |
| AGAP2     | 116986 | 4920  | 6.314369419  | 8.922365629 | 5.024454691 | 11.06775694 |
| TAPT1     | 202018 | 4610  | 6.738979944  | 7.395531619 | 7.058102657 | 5.357119584 |
| ZNF761    | 388561 | 4229  | 7.34610961   | 6.586447291 | 7.194373525 | 5.552553347 |
| VPS45     | 11311  | 2817  | 11.02829164  | 8.938620297 | 9.30042968  | 10.63524023 |
| MTERFD2   | 130916 | 4574  | 6.792019576  | 7.015283472 | 7.021268852 | 4.558411212 |
| STX4      | 6810   | 1403  | 22.14304885  | 24.93566037 | 21.98686754 | 47.18049764 |
| WWC2      | 80014  | 8822  | 3.521502782  | 2.197511173 | 5.43659497  | 1.376754906 |
| CHEK2     | 11200  | 1991  | 15.60356481  | 11.75159814 | 12.73439044 | 4.880253853 |
| TNFAIP8L1 | 126282 | 3845  | 8.079765291  | 6.548788914 | 6.53911225  | 7.633858291 |
| MLKL      | 197259 | 2522  | 12.31827817  | 23.23750836 | 14.24203387 | 67.90436878 |
| PRPSAP2   | 5636   | 1890  | 16.43740611  | 15.68081856 | 16.20967746 | 9.639469665 |
| PPIL3     | 53938  | 1191  | 26.08454873  | 33.49038671 | 31.04520003 | 30.42381735 |
| C6orf211  | 79624  | 2572  | 12.07880931  | 9.790082961 | 10.67924533 | 10.31033478 |
| RBMS2     | 5939   | 8504  | 3.653186447  | 3.223003319 | 3.528038113 | 11.2354684  |
| MPHOSPH   | 10200  | 1101  | 28.21680067  | 17.81042349 | 31.28012362 | 10.11225019 |
| GTPBP6    | 8225   | 1877  | 16.55125069  | 15.07711825 | 16.99733562 | 5.392351171 |
| WASH5P    | 375690 | 1137  | 27.14363357  | 34.1010441  | 24.15744853 | 29.37622022 |
| RMND1     | 55005  | 1928  | 16.00742291  | 15.37175678 | 15.34225446 | 7.664578317 |
| MOSPD2    | 158747 | 3219  | 9.587546249  | 9.968284126 | 8.007685892 | 13.58329742 |
| PSRC1     | 84722  | 1759  | 17.54537315  | 15.07509351 | 9.128846995 | 5.178680405 |
| SH3GLB2   | 56904  | 2039  | 15.13600362  | 15.62779496 | 16.06137225 | 15.48744611 |



|           |        |       |             |             |             |             |
|-----------|--------|-------|-------------|-------------|-------------|-------------|
| STK17A    | 9263   | 3949  | 7.815221923 | 15.17903069 | 9.470094394 | 30.50017054 |
| HTRA3     | 94031  | 2589  | 11.92055287 | 19.79587389 | 6.528690965 | 6.645984299 |
| PIK3C3    | 5289   | 3083  | 10.0104805  | 7.227787374 | 9.046249919 | 9.061038952 |
| PBXIP1    | 57326  | 3213  | 9.605450163 | 14.70293469 | 9.79814175  | 22.99612044 |
| LRR1      | 122769 | 1965  | 15.70601088 | 14.6287106  | 14.51574696 | 7.314223547 |
| SPIN4     | 139886 | 4112  | 7.505425918 | 6.069372736 | 5.960367782 | 1.378406654 |
| ARHGEF11  | 9826   | 6904  | 4.470207325 | 5.971038047 | 4.651692313 | 8.209745311 |
| BYSL      | 705    | 2005  | 15.392674   | 14.2257275  | 18.75745014 | 4.139443083 |
| TAGAP     | 117289 | 3363  | 9.177017953 | 9.408932867 | 5.528712162 | 32.74496029 |
| TINF2     | 26277  | 2196  | 14.05387585 | 15.93111635 | 16.45250191 | 30.14309571 |
| OPA3      | 80207  | 7889  | 3.912068877 | 4.378129818 | 3.562032357 | 3.618008579 |
| CLN3      | 1201   | 1915  | 16.11608949 | 12.45070353 | 17.54270342 | 68.39241479 |
| CRY2      | 1408   | 4204  | 7.341177777 | 3.763349338 | 6.734576123 | 3.755816201 |
| IQSEC1    | 9922   | 7229  | 4.269236599 | 4.777848407 | 4.676381494 | 4.648387225 |
| CERK      | 64781  | 4445  | 6.943152165 | 9.374513396 | 8.793628988 | 2.960152102 |
| MTFR1     | 9650   | 2740  | 11.26361729 | 4.716896246 | 9.716014574 | 2.068616118 |
| CRYZL1    | 9946   | 1726  | 17.8808293  | 14.71780189 | 16.28092309 | 12.19733589 |
| CHMP1B    | 57132  | 3060  | 10.08572267 | 9.466748045 | 10.97852191 | 13.95833009 |
| MAPK8     | 5599   | 1417  | 21.78003626 | 17.92725904 | 23.55892187 | 15.571451   |
| ZFPL1     | 7542   | 1400  | 21.898518   | 22.60160088 | 18.1101224  | 20.53207039 |
| ZNF268    | 10795  | 5862  | 5.229942887 | 4.979713699 | 5.766898979 | 4.316548596 |
| VPS33B    | 26276  | 2639  | 11.61725093 | 12.83462224 | 10.32805389 | 11.19917165 |
| MAPK3     | 5595   | 2005  | 15.29073576 | 18.78240585 | 13.2777456  | 18.47605083 |
| SP2       | 6668   | 3132  | 9.788609581 | 10.316328   | 9.849161928 | 9.888766294 |
| ZFAND3    | 60685  | 3351  | 9.148888453 | 12.10252122 | 8.764124688 | 23.86135508 |
| LIAS      | 11019  | 1743  | 17.58917109 | 14.44641043 | 18.66772992 | 9.058778721 |
| ZDHHC12   | 84885  | 1184  | 25.89351791 | 37.82885949 | 26.58904514 | 26.84234078 |
| TSEN2     | 80746  | 2697  | 11.36741758 | 7.849130534 | 9.949263883 | 2.026540341 |
| GCLC      | 2729   | 3823  | 8.019336962 | 6.003600975 | 9.174279463 | 8.789743984 |
| TTC7A     | 57217  | 5167  | 5.933409175 | 4.61449531  | 6.869719355 | 4.270320507 |
| POLR2J    | 5439   | 991   | 30.93635238 | 27.20762346 | 33.04655702 | 23.28646859 |
| ALPK1     | 80216  | 5441  | 5.634612242 | 8.313735527 | 3.805533287 | 14.02603958 |
| CENPH     | 64946  | 1405  | 21.82058734 | 17.60457509 | 20.30138276 | 6.051254266 |
| KCNQ1OT1  | 10984  | 59461 | 0.515597202 | 0.296055937 | 0.639600024 | 0.129367094 |
| ATG7      | 10533  | 5059  | 6.060076143 | 7.443906646 | 6.431676863 | 11.08377052 |
| NAB1      | 4664   | 4499  | 6.814386576 | 7.57799528  | 6.105138692 | 10.93358829 |
| TRIM21    | 6737   | 1946  | 15.7543295  | 23.4741523  | 13.46316054 | 64.8063626  |
| C14orf133 | 63894  | 2969  | 10.32601051 | 12.15860388 | 10.81686889 | 14.45433444 |
| PPM1D     | 8493   | 4790  | 6.400401922 | 5.442886036 | 5.998899279 | 4.944504586 |
| PCMTD1    | 115294 | 4186  | 7.323919065 | 11.12566438 | 5.703578126 | 17.84430254 |
| POMT1     | 10585  | 3320  | 9.234314821 | 7.919956867 | 8.655038417 | 3.96321569  |
| IRF2      | 3660   | 2302  | 13.31795187 | 21.10231332 | 15.78669807 | 51.97022502 |
| FASTKD3   | 79072  | 2451  | 12.42494453 | 10.81888596 | 13.6201519  | 7.350538067 |
| RIC8B     | 55188  | 4989  | 6.104136909 | 4.957792745 | 5.759616666 | 3.976353692 |
| ZDHHC18   | 84243  | 3165  | 9.62197126  | 18.79820753 | 13.15105782 | 38.950767   |
| TMEM212   | 389177 | 1902  | 16.01132442 | 23.3142504  | 15.88523705 | 25.33021524 |
| HIVEP1    | 3096   | 8891  | 3.425209655 | 3.383467826 | 4.277500511 | 5.008924739 |
| MAGEF1    | 64110  | 1700  | 17.91384649 | 15.86044403 | 18.51848791 | 15.12262682 |
| HLCS      | 3141   | 6010  | 5.067144599 | 4.412161312 | 5.097552479 | 2.3577405   |
| BCKDHB    | 594    | 3712  | 8.204078405 | 5.222641049 | 5.919616159 | 2.235879144 |
| FOXRED1   | 55572  | 2106  | 14.46036991 | 12.2737851  | 13.64422011 | 5.863324141 |
| ZCCHC10   | 54819  | 2136  | 14.25727483 | 10.84953147 | 14.34283258 | 14.12073997 |
| PAK4      | 10298  | 3064  | 9.939144595 | 10.10892401 | 7.999031435 | 6.276351821 |
| ZCCHC14   | 23174  | 6932  | 4.393182204 | 2.314476818 | 2.743166261 | 1.956539789 |
| GRINL1A   | 81488  | 4329  | 7.034774553 | 6.588723411 | 6.393694557 | 7.949389398 |
| ACD       | 65057  | 2095  | 14.53629548 | 11.9127736  | 11.49711828 | 4.058239735 |
| RELT      | 84957  | 3520  | 8.65157359  | 28.86696143 | 9.723900949 | 35.48255922 |
| LMO4      | 8543   | 5415  | 5.62392226  | 3.662439324 | 5.540616087 | 4.074745348 |
| TMED1     | 11018  | 1374  | 22.16414777 | 21.731863   | 25.83394462 | 20.7732676  |
| SMURF2    | 64750  | 3866  | 7.877273419 | 6.686133324 | 7.214068417 | 5.759745195 |
| C4orf42   | 92070  | 2945  | 10.34076028 | 7.717804361 | 10.04409731 | 7.973428897 |
| KIF3A     | 11127  | 6257  | 4.867115077 | 4.344827799 | 3.917058066 | 2.652895439 |

|           |        |      |             |             |             |             |
|-----------|--------|------|-------------|-------------|-------------|-------------|
| CPT2      | 1376   | 3110 | 9.726415714 | 17.84094486 | 10.86995557 | 21.02396229 |
| EIF1B     | 10289  | 1014 | 29.83151171 | 129.6560986 | 38.1312735  | 174.0808368 |
| NLE1      | 54475  | 2726 | 11.09653444 | 6.539477175 | 12.71118887 | 1.039619986 |
| CDC34     | 997    | 1462 | 20.69025504 | 15.08921737 | 20.08794927 | 11.76911994 |
| GTF2E2    | 2961   | 1560 | 19.39048261 | 18.5693904  | 26.81691202 | 50.60721574 |
| NKD2      | 85409  | 1798 | 16.82377801 | 1.36327004  | 11.86861007 | 0.112585575 |
| GOLGA8B   | 440270 | 6519 | 4.640152304 | 3.965116035 | 3.921683713 | 3.850464643 |
| LAMTOR3   | 8649   | 4280 | 7.067559082 | 7.965747842 | 7.898495752 | 12.39167339 |
| RNF170    | 81790  | 4136 | 7.313624969 | 5.603142943 | 7.100720945 | 5.824234693 |
| CETN2     | 1069   | 1087 | 27.82810752 | 41.40956975 | 24.8798983  | 16.94666654 |
| C9orf114  | 51490  | 1891 | 15.9963791  | 13.19791681 | 13.51954316 | 6.851109058 |
| ZNF510    | 22869  | 5154 | 5.869063421 | 4.323490197 | 5.616222799 | 3.456294129 |
| RBM7      | 10179  | 2025 | 14.93785327 | 26.73992217 | 17.42447168 | 52.08169758 |
| C11orf95  | 65998  | 5582 | 5.419052825 | 1.916153505 | 6.321131341 | 1.34178931  |
| BCKDHA    | 593    | 1791 | 16.88953259 | 27.99405587 | 18.16742225 | 20.90973738 |
| PLK1S1    | 55857  | 2329 | 12.98804331 | 5.931999336 | 9.071909032 | 2.868249239 |
| PLCG1     | 5335   | 5205 | 5.811556747 | 1.840884812 | 5.60178618  | 1.050063266 |
| ELP4      | 26610  | 1584 | 19.09668742 | 15.6151692  | 17.4736766  | 8.690127955 |
| BCAT2     | 587    | 2097 | 14.4249656  | 8.288483266 | 15.21411491 | 2.220249808 |
| PSKH1     | 5681   | 3505 | 8.630286126 | 10.74428637 | 7.173434123 | 7.681323473 |
| EXTL2     | 2135   | 2905 | 10.3424326  | 6.980300968 | 9.018695494 | 3.832560228 |
| WASF1     | 8936   | 3230 | 9.301785357 | 2.759537892 | 5.625538538 | 1.942815713 |
| KIAA0754  | 643314 | 6979 | 4.305024603 | 1.309090138 | 4.420056621 | 0.696130206 |
| RPS6KA4   | 8986   | 3149 | 9.54105008  | 17.90303882 | 10.39985329 | 9.89966494  |
| JRK       | 8629   | 9116 | 3.295827852 | 3.959948983 | 2.850814573 | 1.398970861 |
| MAFK      | 7975   | 3350 | 8.968587075 | 9.046341828 | 9.649721937 | 10.87677473 |
| TSHZ1     | 10194  | 4982 | 6.03066373  | 4.87530362  | 5.258793739 | 3.656884317 |
| C14orf118 | 55668  | 2478 | 12.12460319 | 10.25138259 | 13.13069138 | 8.414113351 |
| LSM7      | 51690  | 536  | 56.05366922 | 41.9889947  | 58.73401015 | 22.28228156 |
| SS18L1    | 26039  | 4566 | 6.580106593 | 5.026668096 | 6.66338275  | 3.236379106 |
| LINC00263 | 90271  | 1003 | 29.954902   | 46.43273291 | 14.1137378  | 13.52216732 |
| ACAD10    | 80724  | 4124 | 7.285345951 | 10.64452931 | 7.01891666  | 4.172272879 |
| PSENN     | 55851  | 678  | 44.3138152  | 53.90053141 | 44.2513807  | 35.23098205 |
| F3        | 2152   | 2393 | 12.55527234 | 3.352267719 | 9.270747991 | 5.836853967 |
| MRPL34    | 64981  | 968  | 31.03798213 | 40.05463548 | 32.95867662 | 25.30360787 |
| TFSM      | 10102  | 2102 | 14.29341898 | 9.646895486 | 15.07740923 | 5.296663874 |
| PER1      | 5187   | 4717 | 6.369465063 | 2.26753633  | 5.778192541 | 2.446140595 |
| B3GALT6   | 126792 | 2793 | 10.75716674 | 10.13238488 | 10.74201078 | 4.566064578 |
| SIAH2     | 6478   | 2632 | 11.41518492 | 6.688367057 | 10.91744968 | 7.152691586 |
| PRKAB1    | 5564   | 2412 | 12.45637094 | 19.30847061 | 14.36596222 | 20.56180407 |
| ANGEL2    | 90806  | 4668 | 6.436325343 | 6.683071093 | 6.336732346 | 6.418053067 |
| SH3BP5L   | 80851  | 3182 | 9.377869433 | 9.593990512 | 9.959998179 | 7.634023744 |
| WDR61     | 80349  | 1205 | 24.76380127 | 21.45111322 | 27.17770789 | 8.903510155 |
| PDZD11    | 51248  | 1246 | 23.94894104 | 16.63197406 | 18.82231823 | 15.5964453  |
| YIF1A     | 10897  | 1138 | 26.22177551 | 21.14756586 | 32.49106611 | 16.89871879 |
| ABCD1     | 215    | 3697 | 8.071512181 | 21.09587224 | 10.97286291 | 66.14391843 |
| EFCAB2    | 84288  | 4231 | 7.052796156 | 3.160000256 | 6.741536938 | 1.531014799 |
| RASSF1    | 11186  | 1979 | 15.07851467 | 17.22759008 | 14.6265853  | 10.43342295 |
| SLC25A44  | 9673   | 3653 | 8.168732695 | 12.80998188 | 8.964998087 | 12.30200043 |
| TUSC2     | 11334  | 1691 | 17.64658813 | 15.54953093 | 19.74156848 | 10.53444112 |
| ING3      | 54556  | 2221 | 13.4355608  | 14.24684432 | 12.17669944 | 9.296597939 |
| CAMTA2    | 23125  | 4852 | 6.150119648 | 17.13037745 | 7.489896734 | 38.96713891 |
| DCLRE1B   | 64858  | 3795 | 7.863077875 | 6.224048638 | 8.740897901 | 2.933751637 |
| PLAU      | 5328   | 2680 | 11.13447035 | 11.80680643 | 9.618186898 | 11.93423894 |
| FOS       | 2353   | 2158 | 13.8277945  | 10.11937123 | 23.30202651 | 42.8683922  |
| TSR2      | 90121  | 1353 | 22.05497453 | 23.38672671 | 26.07875473 | 21.84376496 |
| SLC41A1   | 254428 | 4869 | 6.128646649 | 1.601795844 | 4.903507503 | 1.912451776 |
| CTBS      | 1486   | 3152 | 9.467125804 | 16.04791226 | 10.12182708 | 26.07427613 |
| SLC15A4   | 121260 | 2789 | 10.69931177 | 8.469080166 | 8.787749128 | 5.225843719 |
| ELL2      | 22936  | 6063 | 4.921718709 | 8.416408512 | 4.599965116 | 29.21412751 |
| OMA1      | 115209 | 1928 | 15.37136637 | 13.29136864 | 16.43812977 | 11.33937614 |
| TADA2A    | 6871   | 1886 | 15.71367676 | 14.41441545 | 15.12377666 | 7.08393688  |

|          |        |       |             |             |             |             |
|----------|--------|-------|-------------|-------------|-------------|-------------|
| GSTCD    | 79807  | 4063  | 7.29411626  | 8.007278359 | 7.852325613 | 4.035623406 |
| SPECC1   | 92521  | 3948  | 7.506584186 | 31.66391493 | 11.72020333 | 34.96871442 |
| CENPI    | 2491   | 2571  | 11.52703009 | 7.367086038 | 8.628899239 | 2.755741036 |
| FEM1A    | 55527  | 3844  | 7.709675954 | 7.883778649 | 8.959265375 | 7.846488184 |
| SLC19A2  | 10560  | 3655  | 8.108343192 | 3.536059019 | 7.28368808  | 1.43998644  |
| DUSP3    | 1845   | 4139  | 7.160182258 | 2.58419156  | 8.729087749 | 1.907399289 |
| LIN28B   | 389421 | 5504  | 5.384446651 | 5.222641049 | 10.32623561 | 6.693686965 |
| HIRIP3   | 8479   | 2389  | 12.4051881  | 13.52479669 | 13.79674457 | 6.524496629 |
| TOB2     | 10766  | 4575  | 6.477812976 | 5.990911524 | 5.680442764 | 4.468921346 |
| LST1     | 7940   | 769   | 38.53835418 | 116.7770767 | 51.92824434 | 126.3535165 |
| NUDCD2   | 134492 | 977   | 30.33366875 | 17.33396524 | 26.38356283 | 15.12518628 |
| OLIG2    | 10215  | 2505  | 11.83073627 | 4.269847851 | 20.74892267 | 6.383984101 |
| MRPS14   | 63931  | 2252  | 13.1598554  | 13.75388241 | 13.22875282 | 6.202305304 |
| ANKRD44  | 91526  | 6104  | 4.85517601  | 7.41072002  | 6.888215516 | 13.29848854 |
| BAG2     | 9532   | 2068  | 14.33075163 | 11.63729688 | 17.16433264 | 5.57951895  |
| HAUS1    | 115106 | 1185  | 25.00927795 | 21.81315732 | 24.60531398 | 16.39930029 |
| HARS2    | 23438  | 2508  | 11.81658468 | 14.66004505 | 11.79420518 | 15.73908623 |
| SPATA5L1 | 79029  | 2610  | 11.35478711 | 12.20884058 | 12.46661044 | 15.12399551 |
| KIAA1826 | 84437  | 4095  | 7.237117061 | 8.271200997 | 6.552665371 | 7.365543487 |
| COMMD7   | 149951 | 1928  | 15.37136637 | 19.53253305 | 19.6161682  | 20.15889092 |
| KIAA0226 | 9711   | 6903  | 4.293205036 | 6.552953064 | 4.162643422 | 28.97286927 |
| TMEM216  | 51259  | 1306  | 22.69218558 | 17.40347155 | 23.6198891  | 11.6249347  |
| SPAST    | 6683   | 5221  | 5.676306142 | 5.804490543 | 5.301341455 | 5.466858777 |
| ATG14    | 22863  | 4742  | 6.24968249  | 5.028067749 | 7.975531903 | 5.677570387 |
| ST6GALNA | 30815  | 2416  | 12.18195704 | 12.08240137 | 11.28134694 | 26.4766228  |
| SGSM2    | 9905   | 4882  | 6.028596517 | 6.663984427 | 6.664861378 | 3.400075125 |
| FASTK    | 10922  | 1866  | 15.77256602 | 17.55434333 | 19.36210836 | 12.5840022  |
| LOC65443 | 654433 | 2715  | 10.84037134 | 13.37816855 | 13.07397418 | 14.68820847 |
| NUP35    | 129401 | 1649  | 17.84815537 | 11.48622086 | 14.35045074 | 3.437239638 |
| ATG16L1  | 55054  | 3411  | 8.628439812 | 6.728750082 | 8.486078073 | 5.934589943 |
| APBB1IP  | 54518  | 2659  | 11.06867552 | 45.50513269 | 11.76011458 | 103.3079981 |
| ZNF394   | 84124  | 2259  | 13.02860035 | 17.95287677 | 13.65541176 | 28.0479124  |
| SGTB     | 54557  | 5453  | 5.397324078 | 2.65617541  | 5.8894707   | 3.044043052 |
| TRAPPC6B | 122553 | 3364  | 8.748991736 | 9.008693557 | 11.05413734 | 10.71115862 |
| RNF5     | 6048   | 1176  | 25.02687772 | 32.21220783 | 26.05126734 | 18.59040578 |
| GPAM     | 57678  | 6390  | 4.605885477 | 3.068744328 | 5.058930906 | 1.29883934  |
| KIAA1468 | 57614  | 5459  | 5.391391866 | 5.877982525 | 5.65077398  | 7.416334968 |
| EBAG9    | 9166   | 1655  | 17.78344906 | 10.50208424 | 13.91543141 | 9.662767476 |
| KLHL21   | 9903   | 4502  | 6.537451843 | 4.801148472 | 6.80504007  | 7.464058474 |
| HPS6     | 79803  | 2690  | 10.94111829 | 8.946442361 | 9.268253472 | 9.933312234 |
| LCOR     | 84458  | 10390 | 2.832686063 | 6.562733545 | 2.806284607 | 11.20275228 |
| PABPN1   | 8106   | 3118  | 9.439258563 | 9.505050375 | 7.860497857 | 5.713194336 |
| PLXNB1   | 5364   | 7325  | 4.01796699  | 2.403246702 | 3.634386339 | 1.160684265 |
| ZNF414   | 84330  | 1414  | 20.81443295 | 26.94794137 | 16.73542664 | 17.60873419 |
| ARRDC2   | 27106  | 2539  | 11.59181103 | 20.36123783 | 11.48377198 | 19.37385337 |
| MICALL2  | 79778  | 3144  | 9.361198536 | 5.81179394  | 13.91092417 | 3.92753201  |
| MUT      | 4594   | 3886  | 7.57375404  | 7.913255403 | 8.373096564 | 5.886377127 |
| DONSON   | 29980  | 2189  | 13.44522988 | 10.48504638 | 13.99556437 | 6.103382803 |
| RAB4A    | 5867   | 1861  | 15.70511662 | 11.13564733 | 18.73293156 | 6.308905992 |
| RHOXF2   | 84528  | 1297  | 22.53448113 | 13.91630491 | 24.43540031 | 7.647659433 |
| C1orf52  | 148423 | 3402  | 8.591188134 | 5.89504457  | 8.384315927 | 7.497365295 |
| BCS1L    | 617    | 1663  | 17.57499821 | 12.32748466 | 13.46733897 | 5.842805425 |
| C14orf1  | 11161  | 1576  | 18.54519164 | 33.93391138 | 15.95360825 | 28.90005975 |
| SMTN     | 6525   | 3336  | 8.761157683 | 6.01167315  | 4.940111327 | 1.152922181 |
| CELSR1   | 9620   | 11389 | 2.566267629 | 0.371746511 | 1.613993699 | 0.19551475  |
| TARSL2   | 123283 | 3300  | 8.856733949 | 4.929329087 | 8.835544566 | 1.472209912 |
| TOLLIP   | 54472  | 3665  | 7.974685411 | 7.721623728 | 7.782658331 | 13.8082444  |
| PSMB10   | 5699   | 1019  | 28.68225911 | 103.871958  | 24.8814243  | 93.7648904  |
| IGFBP7   | 3490   | 1124  | 26.00286657 | 18.43722392 | 26.31660729 | 2.881549651 |
| POMGNT1  | 55624  | 2953  | 9.89746767  | 7.244137398 | 10.80392786 | 5.826770522 |
| LRRC45   | 201255 | 2639  | 11.07511255 | 11.73692428 | 10.24799146 | 3.068266206 |
| DNAJC19  | 131118 | 1488  | 19.64195029 | 13.3280302  | 28.68247432 | 8.298495054 |

|           |        |       |             |             |             |             |
|-----------|--------|-------|-------------|-------------|-------------|-------------|
| BOLA3     | 388962 | 554   | 52.75671847 | 32.17800502 | 42.33322836 | 14.25040732 |
| KIAA0556  | 23247  | 6640  | 4.401690065 | 6.812505271 | 4.48661918  | 5.060721574 |
| PRPSAP1   | 5635   | 2359  | 12.38966597 | 18.13644573 | 9.762627803 | 10.29735632 |
| POLR2L    | 5441   | 925   | 31.59699679 | 29.87162477 | 42.94220015 | 15.31894098 |
| RAB2B     | 84932  | 2956  | 9.887422879 | 11.15671087 | 8.148329768 | 15.33967026 |
| C1orf212  | 113444 | 6021  | 4.820268371 | 5.995498244 | 6.28134401  | 5.345655076 |
| RAB31     | 11031  | 4009  | 7.23942027  | 16.17468477 | 10.48781928 | 22.6211351  |
| RCBTB1    | 55213  | 4042  | 7.180315651 | 7.221940055 | 6.847675343 | 7.361960132 |
| TBXA2R    | 6915   | 2619  | 11.0816479  | 8.933727338 | 16.21543988 | 4.32837584  |
| SEC61B    | 10952  | 583   | 49.78187969 | 45.10164117 | 57.98552627 | 34.7219319  |
| C4orf32   | 132720 | 2730  | 10.63107541 | 7.182885076 | 8.203730661 | 3.485039033 |
| BIVM      | 54841  | 3873  | 7.493631774 | 8.802840373 | 6.328177722 | 2.090667317 |
| PRUNE     | 58497  | 2995  | 9.690429336 | 6.621739213 | 7.618949658 | 5.001581255 |
| PARP14    | 54625  | 7713  | 3.762846605 | 10.37170152 | 3.341986372 | 79.26036122 |
| TRAPPC2L  | 51693  | 637   | 45.56175175 | 35.33139899 | 46.76789851 | 16.84258985 |
| ZNF678    | 339500 | 8593  | 3.377497482 | 3.008098619 | 2.21292081  | 1.366330042 |
| PANK4     | 55229  | 2642  | 10.98517633 | 7.928187875 | 9.676554173 | 5.516607923 |
| L2HGDH    | 79944  | 6111  | 4.749277673 | 5.250843823 | 5.946813771 | 4.505044242 |
| TULP4     | 56995  | 11123 | 2.609263316 | 1.262110864 | 2.792309622 | 1.546925591 |
| PIGA      | 5277   | 3644  | 7.964554298 | 6.97116522  | 9.450992344 | 6.999461233 |
| DIXDC1    | 85458  | 5899  | 4.919958614 | 3.28639491  | 4.33386271  | 2.093263373 |
| DCPS      | 28960  | 1508  | 19.24591238 | 21.57398672 | 24.09879241 | 7.114542266 |
| TRNT1     | 51095  | 2291  | 12.66819549 | 16.14588637 | 20.28923941 | 9.365979692 |
| MB21D1    | 115004 | 1802  | 16.10590225 | 13.23146352 | 12.19401508 | 23.3658177  |
| AASDH     | 132949 | 3573  | 8.122820001 | 6.9225939   | 7.746516579 | 5.722170489 |
| GPR124    | 25960  | 6050  | 4.797162952 | 0.478814033 | 3.736771813 | 0.200755897 |
| TMEM55B   | 90809  | 1730  | 16.7762057  | 22.41207349 | 13.43429118 | 18.01967913 |
| MARS2     | 92935  | 3102  | 9.356168879 | 7.111681428 | 9.535740358 | 2.4797862   |
| OSBPL2    | 9885   | 3971  | 7.308697019 | 8.361135741 | 9.736870141 | 10.50122029 |
| NDUF4F2   | 91942  | 719   | 40.36555753 | 14.87617367 | 38.49555457 | 6.193929047 |
| POLM      | 27434  | 2651  | 10.94788226 | 10.84323513 | 11.63620338 | 12.06479078 |
| MAGOHB    | 55110  | 3034  | 9.565865479 | 6.683511639 | 9.958378667 | 3.669606942 |
| DRAM2     | 128338 | 1901  | 15.26714143 | 15.12120796 | 23.56252994 | 24.91759807 |
| COG1      | 9382   | 3035  | 9.562713628 | 8.223150145 | 8.145079763 | 5.936134696 |
| NT5DC1    | 221294 | 3193  | 9.089519531 | 8.793272245 | 13.89595988 | 4.564634555 |
| SSNA1     | 8636   | 954   | 30.20801855 | 21.95626034 | 28.7914245  | 20.15801046 |
| DDX31     | 64794  | 3285  | 8.772739633 | 4.070003374 | 9.776342078 | 2.649753762 |
| N6AMT2    | 221143 | 890   | 32.38028056 | 18.77803523 | 26.58864413 | 5.231307694 |
| ATL3      | 25923  | 2256  | 12.7741355  | 9.482241904 | 12.54971544 | 6.998870262 |
| SBNO2     | 22904  | 4948  | 5.824262266 | 7.250618885 | 6.70406377  | 10.96421489 |
| GMEB2     | 26205  | 4210  | 6.845237457 | 6.880819244 | 7.377401406 | 5.818026703 |
| PIF1      | 80119  | 2659  | 10.83807811 | 9.469760578 | 7.071960798 | 2.360020591 |
| AARSD1    | 80755  | 2184  | 13.19526085 | 8.36642864  | 13.35041075 | 2.873303458 |
| GPCPD1    | 56261  | 5478  | 5.260761171 | 7.769449212 | 5.014059689 | 10.97505883 |
| VPS37C    | 55048  | 2711  | 10.6301917  | 15.28840995 | 12.46977566 | 20.90744435 |
| MTL5      | 9633   | 3625  | 7.949917157 | 8.605951962 | 8.917674066 | 3.462231587 |
| DOK1      | 1796   | 2269  | 12.70094742 | 18.26658412 | 11.54663306 | 19.44887269 |
| SEPX1     | 51734  | 1386  | 20.79253225 | 37.29955473 | 33.68970582 | 66.01576194 |
| TRAPPC4   | 51399  | 1216  | 23.69938297 | 12.09453717 | 22.58800903 | 10.98709289 |
| UBE2D1    | 7321   | 2680  | 10.75315287 | 17.5439166  | 13.48122918 | 21.60248314 |
| NFS1      | 9054   | 2507  | 11.49519334 | 13.51039812 | 11.96746554 | 7.024854837 |
| MNT       | 4335   | 4865  | 5.923627892 | 9.069038351 | 6.210425668 | 10.56874228 |
| ECSIT     | 51295  | 1725  | 16.70634765 | 16.40565273 | 15.06552211 | 7.862454387 |
| TULP3     | 7289   | 3106  | 9.278316064 | 6.815552173 | 10.61185537 | 3.519368512 |
| ZDBF2     | 57683  | 10146 | 2.840375487 | 1.537383001 | 0.249893272 | 0.558644605 |
| TRIB1     | 10221  | 3658  | 7.878198385 | 32.52942965 | 13.22695745 | 37.2429264  |
| PAQR8     | 85315  | 4758  | 6.056841045 | 5.245325912 | 5.239933132 | 3.020691314 |
| SEC61G    | 23480  | 484   | 59.11996596 | 51.1041901  | 52.38465158 | 45.58831831 |
| ZNF629    | 23361  | 6087  | 4.700848288 | 3.807228391 | 2.63802232  | 2.926522086 |
| C16orf13  | 84326  | 854   | 33.50592919 | 36.00809191 | 26.22504064 | 9.95551785  |
| C20orf111 | 51526  | 1572  | 18.20233049 | 15.87612003 | 15.05336722 | 18.92941657 |
| SERPIN8   | 5271   | 3407  | 8.398609782 | 3.793453394 | 6.573579309 | 7.783440284 |

|          |        |       |             |             |             |             |
|----------|--------|-------|-------------|-------------|-------------|-------------|
| THG1L    | 54974  | 1320  | 21.67732085 | 16.20601344 | 15.20610025 | 7.82111516  |
| DEDD     | 9191   | 2362  | 12.1143368  | 15.00016802 | 12.88103541 | 20.39715046 |
| TNFAIP3  | 7128   | 4446  | 6.435911724 | 12.73043228 | 8.934218429 | 25.63370442 |
| MRPS17   | 51373  | 600   | 47.69010588 | 30.45380025 | 50.00406019 | 13.15787609 |
| MKNK1    | 8569   | 2816  | 10.16124415 | 12.81920985 | 11.85475579 | 33.06721483 |
| B3GNTL1  | 146712 | 1383  | 20.68985071 | 24.32952668 | 20.01323481 | 17.85706528 |
| SENP7    | 57337  | 4934  | 5.799364314 | 6.322775814 | 6.12357537  | 6.482318676 |
| ZNF605   | 1E+08  | 6202  | 4.613683252 | 4.59893319  | 3.747391769 | 3.231289493 |
| MTBP     | 27085  | 3080  | 9.290280366 | 6.873086055 | 8.849264356 | 4.469208663 |
| PCSK7    | 9159   | 3497  | 8.182460259 | 8.729790623 | 9.183667065 | 10.30378542 |
| SRA1     | 10011  | 1965  | 14.56186439 | 15.64931832 | 16.8812761  | 21.94267064 |
| FAM120C  | 54954  | 8090  | 3.536967061 | 4.65497203  | 3.264597672 | 3.277896298 |
| FBXO42   | 54455  | 3011  | 9.503176196 | 11.54496806 | 10.10461828 | 14.92501082 |
| ZNF738   | 148203 | 11734 | 2.438560041 | 2.734609392 | 2.556880528 | 1.414621336 |
| C17orf63 | 55731  | 4197  | 6.769043926 | 7.53925214  | 7.450594396 | 8.922882927 |
| RNF19A   | 25897  | 4366  | 6.507026422 | 8.52337571  | 7.694520627 | 18.49956856 |
| SDHAF2   | 54949  | 1227  | 23.15377128 | 33.23421459 | 23.76307829 | 26.56157044 |
| CHCHD7   | 79145  | 1767  | 16.07791588 | 20.55559005 | 17.5771703  | 18.10060008 |
| ITGB1BP1 | 9270   | 1930  | 14.72004008 | 8.428386521 | 13.79372017 | 4.929614797 |
| C1D      | 10438  | 1294  | 21.95492841 | 17.04825022 | 21.87956571 | 15.33077942 |
| CCDC22   | 28952  | 2333  | 12.17731563 | 14.99559859 | 12.2260792  | 9.631206081 |
| ARPC5L   | 81873  | 1041  | 27.29075635 | 19.69318636 | 26.99411456 | 15.55649283 |
| ERCC4    | 2072   | 6765  | 4.199508848 | 3.030392756 | 3.685380908 | 2.633220982 |
| CEP44    | 80817  | 4535  | 6.264537455 | 4.569666964 | 5.730545898 | 2.812131944 |
| ARHGAP18 | 93663  | 3503  | 8.11009916  | 6.361195682 | 14.47569019 | 31.78300732 |
| SELS     | 55829  | 1292  | 21.98891436 | 19.31676524 | 26.32882862 | 23.03176692 |
| TMEM126  | 84233  | 818   | 34.73065692 | 22.0653392  | 33.83655714 | 13.11580652 |
| C8orf83  | 286144 | 3842  | 7.394502175 | 8.583872291 | 7.369119735 | 4.90002193  |
| ANXA4    | 307    | 2158  | 13.16481805 | 23.64628582 | 13.21753604 | 18.38556865 |
| ACAP3    | 116983 | 3801  | 7.474263972 | 5.100353479 | 7.393021116 | 1.437931939 |
| ZNF559   | 84527  | 3309  | 8.585577926 | 8.282991908 | 6.193599834 | 3.731689526 |
| PRR14    | 78994  | 2154  | 13.18926525 | 21.724635   | 14.02679706 | 18.2317546  |
| C7orf49  | 78996  | 1879  | 15.11957284 | 18.61880336 | 15.06767324 | 21.00778514 |
| DGKQ     | 1609   | 4653  | 6.105668893 | 5.411582501 | 5.585219353 | 8.222448979 |
| GLOD4    | 51031  | 1863  | 15.24942424 | 13.6354944  | 21.20786386 | 7.714680231 |
| CDR2     | 1039   | 2702  | 10.51431434 | 5.030641661 | 11.88574527 | 4.045580533 |
| RSAD1    | 55316  | 2499  | 11.36841831 | 8.025186725 | 9.131154152 | 1.944094722 |
| GANC     | 2595   | 4603  | 6.171991605 | 7.600419619 | 4.72785801  | 8.839496297 |
| FYN      | 2534   | 2650  | 10.64350611 | 0.924965861 | 4.704075819 | 3.513859508 |
| YPEL2    | 388403 | 5242  | 5.380635481 | 4.420946054 | 5.078573051 | 3.089337855 |
| ZNF804A  | 91752  | 4700  | 6.001125785 | 6.87462538  | 8.40643625  | 5.426816326 |
| ATG4D    | 84971  | 1929  | 14.62171653 | 18.7137869  | 24.53488157 | 29.17326278 |
| TMEM41B  | 440026 | 3445  | 8.187312392 | 13.13063425 | 11.10088296 | 18.92078197 |
| ARL6IP6  | 151188 | 2817  | 10.01252793 | 6.565535262 | 9.750450471 | 5.173900651 |
| SLC27A4  | 10999  | 3204  | 8.80314956  | 6.885279585 | 10.61699331 | 2.274481606 |
| CD83     | 9308   | 2478  | 11.38228054 | 15.19722507 | 12.87489869 | 76.05378184 |
| PIGN     | 23556  | 4893  | 5.764416757 | 5.556016256 | 5.397628279 | 4.302595902 |
| GLCE     | 26035  | 5043  | 5.592958792 | 5.965181923 | 5.991219686 | 5.178132723 |
| NLK      | 51701  | 3555  | 7.933977831 | 7.709822848 | 9.628166341 | 9.964852607 |
| ZNF700   | 90592  | 2884  | 9.779920662 | 13.21234018 | 10.47632485 | 12.91501761 |
| PPP1R15A | 23645  | 2399  | 11.75710346 | 12.91110595 | 18.84741098 | 56.02866403 |
| WHAMM    | 123720 | 4261  | 6.619406522 | 6.275503912 | 5.107329364 | 10.40411194 |
| C5orf30  | 90355  | 3028  | 9.31482536  | 4.04748932  | 7.117254181 | 1.537603649 |
| C17orf96 | 1E+08  | 3232  | 8.72688465  | 5.446714757 | 9.021440924 | 5.198513498 |
| HBP1     | 26959  | 2858  | 9.868891249 | 9.122261762 | 10.86734077 | 29.03982989 |
| GNG4     | 2786   | 5123  | 5.505619986 | 0.956923495 | 7.753569224 | 0.513678551 |
| LIN7A    | 8825   | 1235  | 22.83829246 | 43.66438033 | 29.93913623 | 27.70079177 |
| C6orf125 | 84300  | 535   | 52.72017045 | 49.14814355 | 58.84379335 | 20.05370044 |
| ARHGEF9  | 23229  | 5450  | 5.175282787 | 5.805915823 | 4.729677227 | 2.154288817 |
| SLC25A15 | 10166  | 4038  | 6.984965624 | 6.401335173 | 7.168403246 | 2.105500803 |
| MED29    | 55588  | 3604  | 7.826107433 | 7.666829331 | 8.14888508  | 10.33488091 |
| NRF1     | 4899   | 3540  | 7.967596381 | 6.10586735  | 7.1621953   | 3.945647329 |

|           |        |      |             |             |             |             |
|-----------|--------|------|-------------|-------------|-------------|-------------|
| C17orf101 | 79701  | 4513 | 6.204499229 | 5.925088006 | 6.08619964  | 3.094968213 |
| EXOSC3    | 51010  | 1220 | 22.95156149 | 17.89967468 | 23.37987113 | 14.26957559 |
| GBA2      | 57704  | 3639 | 7.694670245 | 10.65481922 | 9.986528979 | 13.6843914  |
| C19orf28  | 126321 | 2284 | 12.25959064 | 13.36605859 | 17.4837215  | 93.14918344 |
| PP7080    | 25845  | 1760 | 15.90960513 | 20.25751679 | 16.08645342 | 17.71252551 |
| PHACTR2   | 9749   | 9642 | 2.904055696 | 5.870099764 | 2.958249615 | 14.99006515 |
| FRG1      | 2483   | 1053 | 26.59155273 | 23.70110227 | 36.31770352 | 19.99297412 |
| ANKRD33B  | 651746 | 9333 | 3.000204117 | 4.106634713 | 4.799353842 | 6.550253575 |
| SEMA4A    | 64218  | 3313 | 8.451827655 | 7.533130302 | 7.334062045 | 6.598948747 |
| HSPBP1    | 23640  | 1925 | 14.54592469 | 9.144821867 | 13.7197897  | 3.890840483 |
| KLHDC2    | 23588  | 1808 | 15.48722623 | 9.490108808 | 14.72449111 | 6.381883401 |
| DPY30     | 84661  | 800  | 35.00113128 | 30.91803501 | 37.76715109 | 20.74895845 |
| PIGW      | 284098 | 2255 | 12.41725278 | 10.47461844 | 10.5876621  | 3.949831472 |
| AGXT2L2   | 85007  | 2017 | 13.88245167 | 16.79254739 | 11.41796678 | 15.25492671 |
| PGM3      | 5238   | 6243 | 4.485168192 | 3.926252654 | 5.008833042 | 2.658844588 |
| BAK1      | 578    | 2203 | 12.7103518  | 27.1081069  | 19.85290313 | 94.82822813 |
| SLC12A2   | 6558   | 6891 | 4.063402267 | 3.29835058  | 5.917567689 | 1.351288303 |
| CCNYL1    | 151195 | 3773 | 7.421390146 | 6.791878809 | 7.391886695 | 11.48152045 |
| TMEM9B    | 56674  | 1753 | 15.97313464 | 18.81302758 | 16.03016159 | 30.4855789  |
| DDX59     | 83479  | 2337 | 11.89410306 | 13.53968388 | 12.6571958  | 12.90624757 |
| HSDL1     | 83693  | 3668 | 7.578113101 | 5.28528996  | 9.792368983 | 6.898475428 |
| C2orf44   | 80304  | 3897 | 7.132799295 | 4.117001104 | 8.241027387 | 2.753074092 |
| C5orf34   | 375444 | 2540 | 10.94351136 | 6.579705258 | 5.989174338 | 4.462998553 |
| ITPA      | 3704   | 1206 | 23.0485231  | 18.10746526 | 23.82647392 | 10.74249356 |
| ABHD16A   | 7920   | 2270 | 12.24516249 | 16.68791031 | 13.68231715 | 24.79084753 |
| PKD2      | 5311   | 5089 | 5.462078769 | 7.969256951 | 4.857598168 | 10.97865321 |
| PHF5A     | 84844  | 1105 | 25.15522068 | 15.52770744 | 31.54930826 | 10.99161247 |
| BCL2L2    | 599    | 3621 | 7.676475795 | 7.015444921 | 5.893333581 | 10.45407273 |
| BRF1      | 2972   | 3660 | 7.594677282 | 7.914822136 | 8.832395762 | 3.926898708 |
| ZBTB4     | 57659  | 5961 | 4.663063052 | 3.364358602 | 4.678676145 | 4.991954849 |
| BRAF      | 673    | 2949 | 9.425743931 | 8.765205639 | 9.099072463 | 11.39477492 |
| TAZ       | 6901   | 1935 | 14.36512602 | 16.58289747 | 13.5396953  | 9.938367949 |
| C4orf27   | 54969  | 1233 | 22.54381091 | 19.69891536 | 23.30472631 | 14.9400053  |
| C1orf27   | 54953  | 3926 | 7.080111781 | 8.513729677 | 7.641985765 | 7.063870154 |
| RFXAP     | 5994   | 2825 | 9.8394757   | 8.834428563 | 8.451390454 | 2.507968214 |
| SCD5      | 79966  | 3108 | 8.943538885 | 6.237594457 | 7.341941514 | 5.47105035  |
| TMEM206   | 55248  | 2137 | 13.00726198 | 10.74018087 | 10.87567794 | 8.90421765  |
| FBXO30    | 84085  | 4420 | 6.288805171 | 4.789390283 | 5.927445794 | 3.709669208 |
| MYNN      | 55892  | 5367 | 5.179153876 | 4.276461064 | 5.157127583 | 3.998036049 |
| HPDL      | 84842  | 1803 | 15.41681578 | 10.25796608 | 16.52310114 | 1.571827    |
| BBS7      | 55212  | 3863 | 7.195578269 | 5.249229695 | 5.305364186 | 3.458530923 |
| HERC3     | 8916   | 4894 | 5.679713701 | 9.242957704 | 5.785075199 | 9.720225336 |
| DHDDS     | 79947  | 3315 | 8.385073561 | 10.15014642 | 10.51643609 | 8.365838379 |
| SGK494    | 124923 | 3779 | 7.355522322 | 5.01211384  | 6.094215133 | 4.017508526 |
| C2orf18   | 54978  | 3912 | 7.105449605 | 5.468286742 | 8.803531723 | 11.79800122 |
| TMEM41A   | 90407  | 2840 | 9.787506639 | 6.904674738 | 9.299505342 | 5.131999343 |
| CDIPT     | 10423  | 1874 | 14.83272084 | 18.66847999 | 17.02454587 | 19.01146205 |
| PPFIBP1   | 8496   | 6112 | 4.54785976  | 4.046863221 | 2.972920399 | 4.537427066 |
| PINK1     | 65018  | 2680 | 10.2955719  | 9.062971133 | 11.90447723 | 7.477782624 |
| IFT52     | 51098  | 1675 | 16.47291504 | 11.7070306  | 17.28120138 | 7.492889256 |
| TSC22D1   | 8848   | 4837 | 5.704389639 | 3.455127425 | 5.984290326 | 2.594705293 |
| GTF2A1    | 2957   | 1736 | 15.89408565 | 13.34942351 | 15.4568921  | 8.279060639 |
| NEK1      | 4750   | 5695 | 4.844975011 | 3.951905383 | 3.672904543 | 2.736966189 |
| LACTB     | 114294 | 2048 | 13.47272104 | 7.725156551 | 19.29211444 | 16.60549266 |
| NAF1      | 92345  | 1918 | 14.38588774 | 10.92089279 | 14.3206564  | 3.16624916  |
| C1orf35   | 79169  | 1307 | 21.11104261 | 15.17376354 | 19.23709763 | 5.575699362 |
| CYTH3     | 9265   | 4482 | 6.156209881 | 4.076813956 | 6.22257664  | 9.25879449  |
| OBFC2A    | 64859  | 3866 | 7.137126923 | 6.340298842 | 9.454801789 | 19.84494026 |
| GSTM4     | 2948   | 1441 | 19.1479061  | 11.75245249 | 15.98198403 | 10.39537534 |
| C20orf72  | 92667  | 2142 | 12.88148118 | 13.41989558 | 14.99312966 | 15.30974594 |
| SEL1L3    | 23231  | 4564 | 6.04560313  | 4.101215057 | 2.546157291 | 6.96348192  |
| HECTD3    | 79654  | 3628 | 7.605328745 | 7.370430587 | 7.629080413 | 8.313644041 |

|           |        |       |             |             |             |             |
|-----------|--------|-------|-------------|-------------|-------------|-------------|
| PFDN6     | 10471  | 717   | 38.48275131 | 39.46966661 | 41.25504406 | 25.97413583 |
| CXorf56   | 63932  | 2408  | 11.45852686 | 11.93746525 | 13.86336889 | 6.809276536 |
| ENTPD7    | 57089  | 8564  | 3.221874438 | 7.701830299 | 4.440828707 | 5.129269414 |
| BTN3A1    | 11119  | 4191  | 6.583663251 | 9.038787021 | 3.982700107 | 27.24167948 |
| MALT1     | 10892  | 5029  | 5.486604233 | 4.430954161 | 6.638097494 | 4.50825863  |
| ZNF788    | 388507 | 3782  | 7.295645871 | 5.95084642  | 6.815637463 | 1.552204396 |
| NFXL1     | 152518 | 3738  | 7.381522923 | 6.020893836 | 5.991488685 | 3.790802677 |
| GALNT11   | 63917  | 2732  | 10.09960933 | 8.564213725 | 7.656365803 | 7.33545294  |
| TBCB      | 1155   | 1475  | 18.70653063 | 15.10730066 | 19.33792731 | 8.783354054 |
| GCNT1     | 2650   | 5984  | 4.576829298 | 4.989903034 | 5.578708605 | 6.325901967 |
| MRPL27    | 51264  | 728   | 37.62053093 | 36.42457347 | 31.92489526 | 20.29849862 |
| TPRG1L    | 127262 | 2440  | 11.22448628 | 10.04573579 | 8.399435185 | 10.78514434 |
| SP140L    | 93349  | 2668  | 10.26527231 | 17.37226328 | 9.899023677 | 60.09132663 |
| DPM2      | 8818   | 1561  | 17.54500097 | 13.9894959  | 20.16747562 | 9.725922307 |
| TAB1      | 10454  | 3240  | 8.453008185 | 6.946327518 | 7.499304801 | 3.311336338 |
| GLMN      | 11146  | 2042  | 13.41221671 | 10.14859926 | 14.89961099 | 5.154897587 |
| VAMP1     | 6843   | 3151  | 8.691763414 | 4.950265926 | 9.052187491 | 7.002458287 |
| FCER1G    | 2207   | 591   | 46.34136467 | 118.0146029 | 41.47044385 | 667.912492  |
| STRA13    | 201254 | 863   | 31.73551161 | 26.85353327 | 25.46189476 | 7.506052856 |
| CDKN2AIP  | 55602  | 2391  | 11.45451548 | 12.58151921 | 12.28297023 | 11.09083273 |
| RAB13     | 5872   | 1211  | 22.6158105  | 9.936387263 | 16.92371747 | 25.90955719 |
| LINC00265 | 349114 | 4651  | 5.888571601 | 10.30080138 | 6.359893913 | 7.616652552 |
| PLEKHA3   | 65977  | 2516  | 10.88543184 | 8.94519124  | 6.466187053 | 10.13753447 |
| TIPARP    | 25976  | 4132  | 6.628205837 | 5.015353263 | 9.306347185 | 14.20725321 |
| RIPK1     | 8737   | 3864  | 7.087926117 | 10.66874914 | 7.217802407 | 26.92764895 |
| UNCX      | 340260 | 1596  | 17.16024218 | 3.490486916 | 14.16508112 | 0.380505381 |
| SNAPC2    | 6618   | 1561  | 17.54500097 | 8.993247366 | 18.13719284 | 8.947848523 |
| POLL      | 27343  | 2804  | 9.767384635 | 8.821122684 | 8.891441455 | 7.219288978 |
| STK16     | 8576   | 3118  | 8.783754496 | 5.359990813 | 5.895373393 | 3.700591786 |
| CUL9      | 23113  | 7771  | 3.498051776 | 4.674009473 | 3.724876117 | 3.725045348 |
| ERICH1    | 157697 | 1836  | 14.80575182 | 8.981273786 | 14.4999346  | 6.394811575 |
| ZFP62     | 643836 | 4037  | 6.733554706 | 5.298968971 | 6.646808197 | 3.961327762 |
| TMEM111   | 55831  | 1107  | 24.55588107 | 25.76565822 | 35.11869566 | 39.49831472 |
| RPS27L    | 51065  | 1084  | 25.07690069 | 26.10678133 | 28.06734837 | 16.99356691 |
| LOC72967  | 729678 | 2908  | 9.34778554  | 10.11482613 | 8.13751488  | 29.58468595 |
| ZNF708    | 7562   | 4003  | 6.790747027 | 7.236634778 | 6.333792496 | 6.523438252 |
| ANKRD22   | 118932 | 3993  | 6.807753656 | 6.082835622 | 7.302102947 | 9.175963986 |
| ICT1      | 3396   | 888   | 30.61189229 | 20.07501664 | 37.11759321 | 14.5894676  |
| TIMM8B    | 26521  | 1155  | 23.53537693 | 20.45044553 | 24.14682987 | 13.67052062 |
| CDKAL1    | 54901  | 3272  | 8.307872968 | 7.423215965 | 8.007124208 | 5.691765095 |
| TYSND1    | 219743 | 3802  | 7.149752854 | 5.040402653 | 4.779192393 | 1.490796466 |
| RNF146    | 81847  | 2158  | 12.59655253 | 11.97803125 | 9.203321394 | 15.571451   |
| ERCC6     | 2074   | 7006  | 3.880011469 | 2.894344035 | 3.498291795 | 4.189578237 |
| DPH3      | 285381 | 4065  | 6.687173518 | 4.440208478 | 6.289165098 | 4.432021846 |
| FOXO3     | 2309   | 7341  | 3.702950599 | 2.640845058 | 5.382134638 | 6.590450653 |
| SMG8      | 55181  | 3283  | 8.280036658 | 8.959462195 | 10.55458448 | 9.18729838  |
| PIGM      | 93183  | 4322  | 6.289532705 | 6.135374707 | 6.404049916 | 4.683684936 |
| DEDD2     | 162989 | 1951  | 13.93303965 | 8.680309606 | 13.53695293 | 23.55271752 |
| ICK       | 22858  | 6238  | 4.357704449 | 4.358061484 | 6.130577398 | 2.855681299 |
| RASAL2    | 9462   | 10896 | 2.494801794 | 0.674878726 | 2.152405333 | 0.241517549 |
| SOX4      | 6659   | 4912  | 5.534071732 | 4.309671224 | 6.968267781 | 1.524810246 |
| ACSF3     | 197322 | 3625  | 7.498858028 | 6.454463972 | 4.371408856 | 3.573916477 |
| ZNF143    | 7702   | 2955  | 9.199106717 | 10.55721687 | 9.724104076 | 9.453530656 |
| NGDN      | 25983  | 1588  | 17.11798511 | 15.29519058 | 19.69152688 | 10.3254017  |
| PPP1R35   | 221908 | 960   | 28.31600036 | 20.65844681 | 27.51103664 | 17.29079871 |
| RNF141    | 50862  | 4084  | 6.656062769 | 9.493850917 | 6.415110286 | 5.997525078 |
| SRFBP1    | 153443 | 2836  | 9.585105906 | 9.743036992 | 7.673600289 | 6.566803735 |
| BAZ2B     | 29994  | 8145  | 3.337429141 | 7.195211306 | 3.631659495 | 16.67646004 |
| RHBDD2    | 57414  | 1878  | 14.47463277 | 40.46109984 | 17.32580045 | 75.23713863 |
| LLGL1     | 3996   | 4225  | 6.433931444 | 4.904956138 | 6.351044898 | 4.072533338 |
| SLC48A1   | 55652  | 3034  | 8.89221298  | 20.1239801  | 8.774515469 | 22.81828317 |
| POMT2     | 29954  | 4874  | 5.535283993 | 4.663301979 | 4.421634317 | 1.287504052 |

|          |          |      |             |             |             |             |
|----------|----------|------|-------------|-------------|-------------|-------------|
| POP4     | 10775    | 2612 | 10.32885688 | 6.995513074 | 8.655233333 | 7.052460386 |
| TBC1D10C | 374403   | 1766 | 15.27688232 | 35.33021049 | 16.63000104 | 45.62100082 |
| EEF1E1   | 9521     | 1103 | 24.45963208 | 10.50525803 | 26.4345395  | 5.138720002 |
| GLTP     | 51228    | 2371 | 11.37873226 | 14.37933394 | 11.04989895 | 15.36785969 |
| GMPPA    | 29926    | 1845 | 14.62275023 | 13.40619404 | 15.68889556 | 11.52034179 |
| OAS2     | 4939     | 3647 | 7.397579979 | 6.843230242 | 3.24429576  | 481.5664423 |
| ZBTB39   | 9880     | 6256 | 4.312495873 | 2.49333247  | 4.154096171 | 2.782749715 |
| PLA2G4A  | 5321     | 2940 | 9.176521831 | 7.579343018 | 3.521412689 | 5.026294897 |
| ANKRD36B | 57730    | 5986 | 4.507012058 | 4.094820468 | 4.376764185 | 1.589401363 |
| LZIC     | 84328    | 1484 | 18.17990174 | 14.71536597 | 21.21390124 | 9.95775404  |
| SPATA5   | 166378   | 8152 | 3.309491435 | 2.678803129 | 3.084259887 | 1.266421984 |
| ZFP36L1  | 677      | 3022 | 8.927522893 | 0.737368249 | 20.90474641 | 8.975998556 |
| C1orf55  | 163859   | 4029 | 6.696196124 | 5.530719403 | 7.813707978 | 7.837900874 |
| HSPA14   | 51182    | 1810 | 14.9055106  | 14.40410172 | 16.45919964 | 7.828740556 |
| ESCO2    | 157570   | 3376 | 7.991402305 | 8.976672134 | 9.262483614 | 6.295921389 |
| CHTF18   | 63922    | 3096 | 8.714138948 | 8.636925765 | 8.803531723 | 2.615359986 |
| FAM73B   | 84895    | 3597 | 7.500409836 | 6.876404784 | 6.520046848 | 5.909099419 |
| USP45    | 85015    | 6388 | 4.22338356  | 3.627833315 | 4.035181729 | 2.693558759 |
| KCTD15   | 79047    | 4935 | 5.466864069 | 2.257676644 | 4.324166342 | 0.164076079 |
| ANKRD26  | 22852    | 6816 | 3.958182832 | 3.694262526 | 4.494760915 | 3.088703308 |
| RHOBTB2  | 23221    | 5449 | 4.913670034 | 5.234462038 | 6.940717982 | 4.123619708 |
| CEP72    | 55722    | 2427 | 11.03196869 | 21.94355651 | 9.66320911  | 48.37607767 |
| ACN9     | 57001    | 2068 | 12.94709285 | 9.697747402 | 14.20144189 | 1.957725947 |
| PCBD1    | 5092     | 1025 | 26.12154928 | 20.43538767 | 17.72730681 | 7.10969665  |
| C2CD2L   | 9854     | 3370 | 7.944981606 | 8.397552214 | 7.586188761 | 7.027945687 |
| HAUS7    | 55559    | 1892 | 14.15147358 | 11.42429726 | 13.28905212 | 3.637727981 |
| CLUAP1   | 23059    | 2221 | 12.05519496 | 7.223752049 | 9.893568294 | 2.825436628 |
| IRF1     | 3659     | 3567 | 7.506192322 | 55.28649453 | 6.515650056 | 103.8533275 |
| ZNF276   | 92822    | 4621 | 5.794111234 | 5.883052919 | 5.852510161 | 4.862498115 |
| WDR73    | 84942    | 1855 | 14.43374017 | 21.26220226 | 16.17382001 | 11.45823753 |
| C19orf29 | 58509    | 3625 | 7.386093245 | 5.286513348 | 7.227395975 | 3.294704252 |
| RUFY2    | 55680    | 4520 | 5.923581419 | 5.521517852 | 5.983285277 | 4.43372952  |
| SDCCAG8  | 10806    | 2632 | 10.17271581 | 11.42948801 | 8.990840909 | 9.613832777 |
| PISD     | 23761    | 2693 | 9.942290388 | 14.81138157 | 9.964041847 | 12.2524711  |
| DNAJC16  | 23341    | 6035 | 4.436551452 | 5.169275205 | 5.181465564 | 4.796574549 |
| FAM108A1 | 81926    | 1731 | 15.4676996  | 16.99244043 | 15.62359876 | 20.34813527 |
| C22orf46 | 79640    | 4991 | 5.364573836 | 4.687924644 | 4.78364617  | 4.623700737 |
| PASK     | 23178    | 4530 | 5.91050508  | 5.164996004 | 6.110000825 | 1.608706196 |
| ZBTB34   | 403341   | 6577 | 4.070942377 | 7.352089492 | 4.882968485 | 11.35719179 |
| C1orf131 | 128061   | 1486 | 18.01789234 | 16.19510764 | 14.07617185 | 11.98771194 |
| WRAP73   | 49856    | 1708 | 15.6759883  | 9.654343484 | 15.71028378 | 8.770337154 |
| MDM1     | 56890    | 2976 | 8.99683737  | 7.862040288 | 8.945524171 | 5.91777926  |
| ANKRD46  | 157567   | 2800 | 9.562352862 | 5.968732627 | 6.338542841 | 4.482353394 |
| ASB8     | 140461   | 2629 | 10.18432408 | 11.95108731 | 12.29614625 | 11.85775766 |
| PLEKHJ1  | 55111    | 1215 | 22.03669795 | 23.10857471 | 21.04152767 | 12.49560882 |
| APOBEC3C | 27350    | 1127 | 23.57604423 | 43.10339421 | 21.9346203  | 45.80244903 |
| NDUFAF4  | 29078    | 2411 | 11.02040724 | 8.410524393 | 11.39237618 | 3.442382157 |
| PTDSS2   | 81490    | 2473 | 10.7441172  | 8.650197224 | 11.87569019 | 5.075046301 |
| GDAP2    | 54834    | 8885 | 2.990456032 | 3.460991614 | 3.495651088 | 4.283244371 |
| MAGI3    | 260425   | 7221 | 3.679573722 | 2.098410547 | 2.487080005 | 0.841000677 |
| MFAP4    | 4239     | 1978 | 13.43286241 | 3.604977711 | 8.545389742 | 4.502967629 |
| SLC20A2  | 6575     | 3685 | 7.210366851 | 7.377364325 | 10.54990396 | 5.163721335 |
| SESN3    | 143686   | 1987 | 13.37201905 | 20.41044219 | 5.210343889 | 5.093831478 |
| CCDC115  | 84317    | 1644 | 16.16192326 | 16.12961647 | 12.08075886 | 12.31319118 |
| CRTC1    | 23373    | 7009 | 3.790869146 | 4.101215057 | 2.833609298 | 3.985616078 |
| ARHGAP21 | 57584    | 7185 | 3.698009999 | 3.907713052 | 3.322919699 | 3.465379282 |
| NEURL4   | 84461    | 5217 | 5.093003996 | 3.929577726 | 5.548401822 | 2.405710083 |
| RFK      | 55312    | 2707 | 9.815368247 | 5.350618584 | 8.663689882 | 5.010245223 |
| ACTR1B   | 10120    | 2258 | 11.76713988 | 20.32928833 | 11.97716982 | 8.337415525 |
| POLR2F   | 5435     | 2119 | 12.53902871 | 8.202430113 | 14.25848083 | 5.636292079 |
| LAMTOR2  | 28956    | 699  | 38.01173368 | 74.27756158 | 48.96728375 | 55.31318001 |
| LOC10050 | 1.01E+08 | 711  | 37.37018544 | 73.65074671 | 39.22586287 | 15.6590541  |



|           |        |      |             |             |             |             |
|-----------|--------|------|-------------|-------------|-------------|-------------|
| C1orf135  | 79000  | 2061 | 12.89189803 | 11.89305935 | 12.711941   | 6.384219356 |
| FUT11     | 170384 | 2069 | 12.84205019 | 13.677985   | 15.6242477  | 14.67584797 |
| RAD54L2   | 23132  | 4731 | 5.61619147  | 6.735378127 | 5.805753324 | 7.017191614 |
| TTC9C     | 283237 | 1156 | 22.98460367 | 24.48075343 | 17.36336707 | 24.69071771 |
| INPP5E    | 56623  | 3396 | 7.823969919 | 4.330670552 | 5.163909067 | 1.192160559 |
| THAP5     | 168451 | 3427 | 7.753195753 | 8.778060239 | 7.151745643 | 5.316194242 |
| D2HGDH    | 728294 | 2604 | 10.20361054 | 13.09270383 | 8.519546829 | 6.296750345 |
| PTAFR     | 5724   | 4247 | 6.25622836  | 30.74639822 | 12.78553889 | 79.36050314 |
| ZNF473    | 25888  | 4711 | 5.640034355 | 6.811272894 | 8.028013645 | 4.726634457 |
| CXorf69   | 644538 | 1552 | 16.9882833  | 10.48117654 | 15.92803936 | 1.956464526 |
| ZMYM1     | 79830  | 4172 | 6.319706538 | 4.807032988 | 6.73558803  | 3.881665637 |
| ZNF280C   | 55609  | 4695 | 5.615722189 | 5.742865784 | 5.310245333 | 4.699626424 |
| CCDC132   | 55610  | 3625 | 7.273328463 | 7.683885681 | 7.169110523 | 8.711421413 |
| EXD2      | 55218  | 5281 | 4.992580132 | 4.303907185 | 4.080864544 | 3.334843984 |
| TADA1     | 117143 | 2276 | 11.58427754 | 7.636621006 | 10.48997277 | 4.358090635 |
| GLCCI1    | 113263 | 4762 | 5.536710558 | 4.305041368 | 5.546114063 | 2.252988185 |
| C9orf80   | 58493  | 1532 | 17.21006245 | 16.14518799 | 18.20469223 | 13.74190715 |
| MRPL50    | 54534  | 1050 | 25.11030065 | 14.0066259  | 26.15906569 | 10.41062724 |
| LRRCC1    | 85444  | 3876 | 6.802326026 | 5.116643174 | 5.12403704  | 1.514560636 |
| ZNF496    | 84838  | 2453 | 10.74839612 | 7.903156776 | 9.819185811 | 6.024177332 |
| ISOC1     | 51015  | 1942 | 13.57663011 | 7.573098452 | 10.00937078 | 2.188983585 |
| RNPEPL1   | 57140  | 3048 | 8.650201994 | 16.22993964 | 9.98195723  | 18.26375896 |
| AGTRAP    | 57085  | 1297 | 20.32830816 | 63.39650013 | 19.22251491 | 42.92053764 |
| ASB6      | 140459 | 4657 | 5.661545132 | 7.655836281 | 5.807268511 | 6.867889274 |
| ASNS      | 440    | 2362 | 11.16249605 | 7.92461707  | 12.16542233 | 5.913459587 |
| CNIH4     | 29097  | 651  | 40.50048491 | 44.15578546 | 43.16570393 | 77.73765858 |
| VAV3      | 10451  | 4776 | 5.52048067  | 7.138484247 | 10.35189157 | 13.26638068 |
| SMG6      | 23293  | 6331 | 4.132274445 | 18.37287339 | 4.972584022 | 36.61049567 |
| IL4R      | 3566   | 3678 | 7.112949839 | 5.573846383 | 7.35303139  | 10.67732447 |
| IRF2BPL   | 64207  | 4166 | 6.279747842 | 4.706979418 | 6.440990085 | 9.183642606 |
| C1orf123  | 54987  | 1118 | 23.40020529 | 19.73205348 | 26.6468259  | 6.88040858  |
| VAV2      | 7410   | 4865 | 5.377477803 | 3.297832128 | 5.254975565 | 2.163679522 |
| SLC9A1    | 6548   | 4587 | 5.703385548 | 14.03938214 | 6.264383594 | 48.67648481 |
| LOC55064  | 550643 | 722  | 36.23466691 | 51.85026459 | 26.04479745 | 35.60729307 |
| MICAL1    | 64780  | 3661 | 7.145979107 | 5.295395677 | 6.059792391 | 11.66689158 |
| SLC26A6   | 65010  | 2750 | 9.513247094 | 9.318457726 | 16.36496515 | 25.1747895  |
| ARL3      | 403    | 3891 | 6.72357479  | 3.550662157 | 6.081699633 | 1.508721929 |
| ALG6      | 29929  | 3371 | 7.760732575 | 7.667929822 | 7.583938334 | 5.224358077 |
| CYB5R4    | 51167  | 2259 | 11.58097809 | 18.24880331 | 20.20252698 | 30.28816099 |
| RNF168    | 165918 | 5365 | 4.876314913 | 4.527262374 | 4.804611535 | 3.244898828 |
| GPR153    | 387509 | 4099 | 6.382393147 | 0.706715028 | 4.587544221 | 0.34569457  |
| MEIS2     | 4212   | 3773 | 6.933853567 | 12.52068093 | 9.29585751  | 10.83769688 |
| HEBP2     | 23593  | 1282 | 20.40673129 | 17.55546112 | 22.57879275 | 14.52687628 |
| POP1      | 10940  | 4761 | 5.494944236 | 3.276262956 | 4.881605492 | 1.403098609 |
| MED8      | 112950 | 1502 | 17.41772937 | 16.6160191  | 15.19224649 | 21.96797914 |
| C9orf25   | 203259 | 3692 | 7.085977657 | 7.484088003 | 6.695643846 | 10.19820382 |
| LOC64676  | 646762 | 5784 | 4.523068726 | 5.355073164 | 4.310442919 | 2.064886396 |
| DCBLD2    | 131566 | 6093 | 4.293686117 | 2.157743049 | 3.537017177 | 0.96347235  |
| GCC1      | 79571  | 4152 | 6.300922329 | 5.957232179 | 6.869807992 | 7.898235982 |
| IKZF5     | 64376  | 1727 | 15.14848263 | 12.51579063 | 17.49491655 | 8.67384821  |
| RASA2     | 5922   | 2592 | 10.0931441  | 9.800511597 | 10.59684374 | 11.16795039 |
| C14orf102 | 55051  | 3824 | 6.84137801  | 7.866739655 | 6.575022647 | 7.940462721 |
| SPC25     | 57405  | 1375 | 19.02649419 | 18.63691545 | 23.35656998 | 6.624944606 |
| RIPK2     | 8767   | 2588 | 10.10874401 | 11.45160242 | 9.06205893  | 32.30414235 |
| FAM100A   | 124402 | 1430 | 18.29470595 | 7.012217352 | 14.62740656 | 10.75845705 |
| GMFG      | 9535   | 674  | 38.81517731 | 57.85715108 | 51.41053541 | 59.7675723  |
| RNF125    | 54941  | 5888 | 4.443177566 | 1.3624281   | 3.624280044 | 1.065776962 |
| CLSTN3    | 9746   | 4029 | 6.442552331 | 10.45305967 | 6.660006129 | 14.92215743 |
| GFOD2     | 81577  | 5309 | 4.889252843 | 4.155290222 | 4.61650637  | 3.889196463 |
| C3orf75   | 54859  | 1374 | 18.89158904 | 17.02869862 | 18.45281759 | 6.187781837 |
| FAM54A    | 113115 | 1811 | 14.33298914 | 17.84138006 | 13.65009226 | 10.17174298 |
| ISCA1     | 81689  | 2012 | 12.90111498 | 11.73969413 | 13.12653835 | 8.04886135  |

|           |        |       |             |             |             |             |
|-----------|--------|-------|-------------|-------------|-------------|-------------|
| USP53     | 54532  | 6612  | 3.925747632 | 2.864606504 | 3.930433401 | 3.337075932 |
| AGL       | 178    | 7449  | 3.484634628 | 4.965797512 | 3.914256554 | 3.777367694 |
| MGST3     | 4259   | 1528  | 16.98759381 | 8.312475805 | 13.96581211 | 2.649592447 |
| NOSIP     | 51070  | 1116  | 23.25899941 | 18.17004867 | 26.31593354 | 22.31070801 |
| FBXO33    | 254170 | 5149  | 5.041181461 | 4.933564976 | 7.180973633 | 4.521134053 |
| TMCO7     | 79613  | 4834  | 5.369682115 | 4.794083412 | 5.725755842 | 1.926298655 |
| MRPS11    | 64963  | 1501  | 17.29316678 | 22.71379132 | 20.41058654 | 15.37434402 |
| ZNF780B   | 163131 | 8664  | 2.995965298 | 2.751973369 | 2.828835678 | 3.364468636 |
| MVK       | 4598   | 2087  | 12.43749082 | 12.70584067 | 9.313942523 | 9.11754342  |
| NEU3      | 10825  | 2748  | 9.44579452  | 9.163061636 | 11.30235077 | 3.388547196 |
| RAB3IP    | 117177 | 9636  | 2.693757092 | 1.734376438 | 2.433853104 | 1.6385898   |
| SPRYD7    | 57213  | 3220  | 8.061193584 | 6.574256227 | 7.152186021 | 2.891840899 |
| SYTL1     | 84958  | 1989  | 13.05029831 | 34.50601654 | 19.54569939 | 26.15596671 |
| TMCO6     | 55374  | 1896  | 13.6904237  | 9.519750772 | 13.03814192 | 12.38488824 |
| C5orf62   | 85027  | 2344  | 11.07382395 | 27.75902045 | 10.99690311 | 13.29950721 |
| FAM3A     | 60343  | 3080  | 8.427611475 | 7.958310169 | 8.094675922 | 5.652234485 |
| CEP97     | 79598  | 4439  | 5.847497937 | 2.961732012 | 4.664543053 | 2.052106067 |
| HMBX1     | 79618  | 3233  | 8.028779258 | 7.85738511  | 7.058074305 | 6.76223854  |
| KIAA1370  | 56204  | 4231  | 6.134966519 | 5.003333739 | 5.842665346 | 10.28650568 |
| ZFYVE19   | 84936  | 2293  | 11.32012357 | 10.30103122 | 11.05720513 | 8.828123112 |
| ATAD3B    | 83858  | 2466  | 10.52597054 | 6.054253803 | 11.30964659 | 2.216374412 |
| FAM160A2  | 84067  | 3507  | 7.401495107 | 9.086134565 | 5.783671825 | 9.639469665 |
| ENOX2     | 10495  | 4184  | 6.203882252 | 7.402902289 | 6.7162699   | 4.934929259 |
| SOCS5     | 9655   | 4510  | 5.755441983 | 5.731394996 | 4.684806239 | 3.186795847 |
| CCHCR1    | 54535  | 2974  | 8.727990364 | 7.342838973 | 8.312144277 | 5.445295574 |
| TERT      | 7015   | 4018  | 6.46018998  | 0.277293037 | 2.576643431 | 0.100761007 |
| COQ2      | 27235  | 1657  | 15.54173638 | 11.16180618 | 14.15365631 | 9.52893863  |
| LGALS12   | 85329  | 1823  | 14.12652615 | 39.97053643 | 11.47404903 | 26.09477937 |
| SLC9A6    | 10479  | 4742  | 5.430758577 | 5.357006761 | 6.460626402 | 7.897372342 |
| ZNF274    | 10782  | 2839  | 9.071031058 | 8.319924122 | 7.516647023 | 7.914619157 |
| DENND5B   | 160518 | 9409  | 2.737023825 | 0.899951325 | 3.32342913  | 0.688460369 |
| ZNF25     | 219749 | 3736  | 6.893109522 | 4.711933109 | 4.241530274 | 3.521915442 |
| KLHL20    | 27252  | 3505  | 7.347405756 | 6.86617117  | 6.630905492 | 8.951918333 |
| CCDC69    | 26112  | 3416  | 7.538834067 | 6.84936531  | 17.38027457 | 18.13326466 |
| OXNAD1    | 92106  | 3992  | 6.451066426 | 4.242305621 | 6.351245332 | 2.079053953 |
| CHST10    | 9486   | 2872  | 8.966802637 | 4.112163054 | 8.975188331 | 1.550638922 |
| LINC00094 | 266655 | 5734  | 4.491220295 | 1.865359063 | 3.168902943 | 1.165007408 |
| PLEKHG2   | 64857  | 7642  | 3.369884477 | 2.59514642  | 4.589540747 | 7.046071388 |
| TUBB3     | 10381  | 1851  | 13.91283478 | 1.324235296 | 10.0448725  | 0.656171355 |
| PIP4K2C   | 79837  | 3229  | 7.97542805  | 10.69652095 | 7.393985145 | 16.80115679 |
| CYP2R1    | 120227 | 1633  | 15.77015136 | 4.639504765 | 13.06782664 | 3.594878767 |
| C20orf194 | 25943  | 6855  | 3.756769828 | 1.495303209 | 2.989733312 | 1.653685824 |
| ZNF777    | 27153  | 3125  | 8.240850296 | 5.847129648 | 8.857057196 | 4.275297586 |
| METTL10   | 399818 | 2638  | 9.762189982 | 7.602328138 | 10.01159787 | 3.836786637 |
| THUMPD2   | 80745  | 2345  | 10.98194336 | 9.977582899 | 12.97441605 | 6.47427067  |
| ZC3H6     | 376940 | 11557 | 2.228316793 | 2.737928635 | 1.809915322 | 2.031820378 |
| LYSMD2    | 256586 | 1709  | 15.06884563 | 10.17024541 | 14.83567663 | 30.67821855 |
| APOLD1    | 81575  | 4752  | 5.419330213 | 3.985853999 | 3.1123597   | 2.385525321 |
| PTGS1     | 5742   | 5093  | 5.05648089  | 42.48390671 | 6.305769434 | 60.81212651 |
| IRGQ      | 126298 | 9703  | 2.654092257 | 2.778806024 | 3.396931132 | 2.044525257 |
| SMYD2     | 56950  | 1689  | 15.24728074 | 9.762947703 | 17.88852627 | 4.194795858 |
| PEX2      | 5828   | 4392  | 5.863537608 | 6.291268877 | 5.243633649 | 5.346481808 |
| SARS2     | 54938  | 2083  | 12.36325356 | 10.48372689 | 12.98341308 | 3.88725613  |
| LSM6      | 11157  | 789   | 32.38057162 | 21.74666252 | 27.84995587 | 20.52510651 |
| BRI3BP    | 140707 | 1272  | 20.08511871 | 19.27012211 | 21.26135963 | 7.002256266 |
| E2F6      | 1876   | 3444  | 7.418197156 | 7.634801626 | 8.650160091 | 5.525061881 |
| TMEM50B   | 757    | 2350  | 10.87160468 | 12.61138173 | 10.78900909 | 8.18329446  |
| RNF19B    | 127544 | 2604  | 9.811163981 | 6.332418844 | 8.60068537  | 45.01010432 |
| RABEPK    | 10244  | 1721  | 14.84501511 | 13.72473247 | 16.94206686 | 3.763930049 |
| ARHGAP9   | 64333  | 2614  | 9.773630836 | 65.04259314 | 16.32728454 | 93.23808378 |
| ATP5SL    | 55101  | 1782  | 14.33685242 | 15.7558464  | 17.31064824 | 9.99648706  |
| ZUFSP     | 221302 | 2226  | 11.47721069 | 11.11160288 | 11.86459801 | 19.55175451 |

|           |        |      |             |             |             |             |
|-----------|--------|------|-------------|-------------|-------------|-------------|
| PLA2G12A  | 81579  | 5235 | 4.880280994 | 3.660670657 | 5.650404315 | 1.430729308 |
| BTBD3     | 22903  | 4857 | 5.260092857 | 4.817260016 | 3.697592077 | 4.167775642 |
| TSTA3     | 7264   | 1363 | 18.74414601 | 17.00264066 | 16.58655133 | 5.643651352 |
| ZNHIT3    | 9326   | 983  | 25.99010275 | 25.84224421 | 33.9603177  | 22.6522634  |
| ELOF1     | 84337  | 1029 | 24.82825171 | 24.47045032 | 25.46094306 | 39.54149801 |
| TRIAP1    | 51499  | 1196 | 21.36143061 | 13.60099163 | 25.08564892 | 5.246901966 |
| DNAJC24   | 120526 | 3000 | 8.516090335 | 5.570817119 | 8.028820932 | 3.711195821 |
| ENO2      | 2026   | 2423 | 10.54406562 | 1.471449837 | 13.51594635 | 9.524098381 |
| GPR172A   | 79581  | 1952 | 13.08825359 | 10.04573579 | 14.7206596  | 7.051825144 |
| TSTD2     | 158427 | 4445 | 5.747642521 | 4.76245333  | 4.800846096 | 3.50664172  |
| CHMP4A    | 29082  | 1372 | 18.62118878 | 24.84941747 | 20.94367897 | 25.96755093 |
| UBLCP1    | 134510 | 2410 | 10.60094233 | 9.985863051 | 12.09846351 | 11.33937614 |
| TTC27     | 55622  | 2953 | 8.651632579 | 5.508562813 | 7.226468303 | 1.987957002 |
| RNF115    | 27246  | 1675 | 15.25269911 | 16.49627039 | 15.38909904 | 18.12795788 |
| ZFP1      | 162239 | 3307 | 7.725512853 | 3.36910621  | 6.900137353 | 2.876975071 |
| ITPKB     | 3707   | 6162 | 4.146100455 | 9.149086212 | 7.954895267 | 21.05759512 |
| NIPSNAP3  | 25934  | 1664 | 15.35352825 | 14.06095667 | 13.84016766 | 12.53015197 |
| LOC93622  | 93622  | 1688 | 15.13523164 | 16.76525531 | 15.27058109 | 5.396504048 |
| SLFN5     | 162394 | 4660 | 5.438601896 | 6.503271486 | 4.670027987 | 95.82791238 |
| CCDC77    | 84318  | 2386 | 10.62191318 | 9.899524134 | 10.80332812 | 6.108498798 |
| STK3      | 6788   | 2826 | 8.968112115 | 6.071520426 | 9.943691883 | 6.876564347 |
| LYRM1     | 57149  | 1657 | 15.29504215 | 9.413571474 | 16.19382299 | 12.94958327 |
| PDSS1     | 23590  | 1679 | 15.09463064 | 13.27175013 | 13.08732292 | 3.97864948  |
| L3MBTL2   | 83746  | 3205 | 7.907608374 | 8.273662866 | 8.833746653 | 6.316033166 |
| MMACHC    | 25974  | 2866 | 8.842946559 | 6.997537204 | 7.372113097 | 1.836409783 |
| PMM2      | 5373   | 2340 | 10.83072002 | 13.80800824 | 15.89150342 | 11.85160437 |
| PEX3      | 8504   | 2774 | 9.136223806 | 6.667308159 | 6.702616799 | 5.61896988  |
| WDR85     | 92715  | 1847 | 13.72164853 | 8.445201912 | 13.15525044 | 4.164751918 |
| EAPP      | 55837  | 1363 | 18.59419284 | 16.51217987 | 18.13669632 | 16.63391977 |
| TOP3B     | 8940   | 3124 | 8.112639193 | 5.064379199 | 7.574869806 | 4.730251919 |
| SPTBN2    | 6712   | 7884 | 3.214597265 | 0.423958685 | 3.162303633 | 0.256759085 |
| MRPS36    | 92259  | 1329 | 19.06989077 | 22.13236598 | 15.89802569 | 18.12568449 |
| HYAL3     | 8372   | 1945 | 13.03027498 | 18.67441008 | 17.27212188 | 9.158735188 |
| PIK3C2B   | 5287   | 7606 | 3.332091091 | 1.318363241 | 3.277886122 | 1.277489537 |
| CRK       | 1398   | 2415 | 10.4097303  | 9.503837072 | 9.79871357  | 12.99232868 |
| FGD3      | 89846  | 3470 | 7.244812297 | 8.797716948 | 9.255124993 | 29.81012939 |
| ARID3B    | 10620  | 4253 | 5.911003684 | 6.758856415 | 14.55594523 | 24.13153857 |
| NDUFB2    | 4708   | 509  | 49.38997774 | 51.65865776 | 49.81173156 | 25.05504591 |
| MRPL41    | 64975  | 632  | 39.77768777 | 21.86016844 | 32.0938878  | 15.37434402 |
| C19orf79  | 1E+08  | 439  | 57.26537282 | 58.37302675 | 54.86665785 | 31.81683723 |
| SERINC5   | 256987 | 6479 | 3.880151053 | 1.685260311 | 3.619788318 | 2.968165146 |
| RAD9A     | 5883   | 2128 | 11.81367419 | 13.82232819 | 10.72309879 | 18.54963735 |
| INVS      | 27130  | 3880 | 6.479252234 | 5.743110431 | 6.806854425 | 3.912929052 |
| ZC3H3     | 23144  | 3302 | 7.613415708 | 7.490741371 | 7.294507206 | 7.663115648 |
| ELMOD2    | 255520 | 4425 | 5.681242637 | 6.496139284 | 6.254983896 | 2.97353132  |
| PMS2      | 5395   | 2851 | 8.817782767 | 7.815948255 | 10.00471511 | 4.047157204 |
| EDEM2     | 55741  | 2134 | 11.78045861 | 11.17296029 | 12.77213412 | 19.63578942 |
| TCFL5     | 10732  | 2474 | 10.16147885 | 5.494257789 | 7.259177331 | 1.063692489 |
| ZFP64     | 55734  | 3281 | 7.662145282 | 4.686210072 | 5.988870103 | 3.393351863 |
| TMEM18    | 129787 | 2138 | 11.75841846 | 14.48725125 | 8.992943538 | 5.018114938 |
| SLC2A5    | 6518   | 2454 | 10.24429449 | 187.5099813 | 12.05373537 | 84.96402968 |
| ORMDL3    | 94103  | 2169 | 11.59036361 | 10.06805122 | 13.83238179 | 12.97261962 |
| PRMT7     | 54496  | 2478 | 10.14507614 | 9.891684956 | 10.40223603 | 5.146496516 |
| ZCCHC2    | 54877  | 5559 | 4.522305931 | 3.447312626 | 2.850576921 | 19.3361623  |
| ABC8      | 11194  | 4683 | 5.368246566 | 4.377665385 | 4.286152537 | 2.20454239  |
| MTMR9     | 66036  | 7421 | 3.387616045 | 3.513195542 | 4.014438937 | 3.273340999 |
| POC5      | 134359 | 2170 | 11.58502243 | 9.960723696 | 11.68394994 | 11.84721917 |
| FASTKD5   | 60493  | 2875 | 8.673082609 | 8.680786327 | 13.00779226 | 10.13904566 |
| WDR7      | 23335  | 7282 | 3.424212099 | 4.100464125 | 3.017524743 | 3.808397998 |
| C20orf112 | 140688 | 6005 | 4.152391757 | 7.013385082 | 4.011067909 | 12.70868965 |
| NCEH1     | 57552  | 4318 | 5.77469025  | 11.50803351 | 6.458913502 | 18.37705287 |
| FAM50A    | 9130   | 1357 | 18.37517502 | 22.98937057 | 26.00188294 | 33.26576009 |

|          |        |      |             |             |             |             |
|----------|--------|------|-------------|-------------|-------------|-------------|
| TIMM8A   | 1678   | 1459 | 17.09055004 | 13.74567623 | 16.79851427 | 4.162348107 |
| C14orf21 | 161424 | 2047 | 12.1812958  | 13.38955556 | 11.9731472  | 11.37240803 |
| PIGB     | 9488   | 2227 | 11.19672766 | 20.51221391 | 14.80036945 | 23.36067255 |
| TMEM70   | 54968  | 2189 | 11.39109753 | 9.670673847 | 11.19645149 | 7.860417246 |
| DOLPP1   | 57171  | 2225 | 11.20679214 | 9.313905475 | 12.43968707 | 8.552050839 |
| GALNT10  | 55568  | 5966 | 4.179536122 | 3.697692891 | 4.993488326 | 4.953840763 |
| NFIX     | 4784   | 5576 | 4.471863791 | 6.074348651 | 3.220804289 | 3.194716632 |
| PIAS2    | 9063   | 2360 | 10.56572564 | 8.875539138 | 8.684161802 | 8.405944309 |
| ZNF322   | 79692  | 4800 | 5.194815104 | 3.945995459 | 5.194083717 | 3.711195821 |
| TLR4     | 7099   | 5787 | 4.308815017 | 7.393100997 | 2.59222707  | 13.46727359 |
| ACSF2    | 80221  | 2257 | 11.04790098 | 14.01960179 | 11.13995862 | 8.69986695  |
| HAUS5    | 23354  | 4309 | 5.786751567 | 5.636751598 | 4.756236215 | 2.91264551  |
| SIX4     | 51804  | 6277 | 3.972456986 | 2.165492077 | 2.154249598 | 1.289972044 |
| MPST     | 4357   | 1626 | 15.33524754 | 12.74504285 | 17.80197559 | 4.730809835 |
| BCL2L12  | 83596  | 1893 | 13.17227285 | 14.0079712  | 15.29107887 | 8.020160973 |
| C12orf4  | 57102  | 3830 | 6.510473238 | 6.690798628 | 5.792402074 | 7.55804893  |
| EVI5     | 7813   | 7403 | 3.368244293 | 2.588627703 | 2.854042434 | 2.105500803 |
| PVT1     | 5820   | 1918 | 13.00058003 | 7.667860893 | 9.693982794 | 4.010582269 |
| CEP128   | 145508 | 4461 | 5.589579131 | 10.24001353 | 5.920330681 | 6.352844836 |
| PEX13    | 5194   | 4524 | 5.511740164 | 6.403238067 | 6.912056738 | 8.904364219 |
| KCTD2    | 23510  | 3714 | 6.713815967 | 5.999803036 | 6.314649572 | 5.777452739 |
| FBXO10   | 26267  | 4592 | 5.430120318 | 3.251260862 | 3.956988127 | 1.322488216 |
| LOC10012 | 1E+08  | 3161 | 7.888362069 | 8.811795505 | 8.221457022 | 2.433501042 |
| E4F1     | 1877   | 2573 | 9.691065877 | 6.668525738 | 11.24990762 | 6.215266294 |
| ZCCHC4   | 29063  | 2814 | 8.861091863 | 8.23546525  | 9.835928834 | 6.690079693 |
| SHARPIN  | 81858  | 1816 | 13.73078882 | 17.66955209 | 14.54327928 | 11.92725129 |
| PET112   | 5188   | 2233 | 11.16664241 | 8.382420743 | 13.62517046 | 4.713972626 |
| NDEL1    | 81565  | 2420 | 10.3037655  | 9.115882558 | 10.38962256 | 16.31141664 |
| DLL1     | 28514  | 3366 | 7.407935978 | 3.64105694  | 7.030271323 | 13.5914804  |
| TRMT2B   | 79979  | 3574 | 6.976808198 | 8.479363493 | 5.143193687 | 5.890487338 |
| FAM69B   | 138311 | 2334 | 10.59585533 | 7.160433314 | 7.966177806 | 1.474417597 |
| MOCS2    | 4338   | 1532 | 16.14277176 | 12.2179801  | 13.92934784 | 8.985093134 |
| RRP8     | 23378  | 1699 | 14.55604846 | 16.2632448  | 17.28580449 | 7.863628579 |
| BPGM     | 669    | 2121 | 11.65993698 | 8.614936421 | 11.25656673 | 7.348902616 |
| GPANK1   | 7918   | 2793 | 8.854538608 | 7.978255809 | 7.337852435 | 7.682584845 |
| MED10    | 84246  | 1059 | 23.35290494 | 28.82726894 | 23.54258908 | 25.80537913 |
| POC1A    | 25886  | 2284 | 10.82781363 | 11.31724669 | 10.26821739 | 4.608713167 |
| VAMP2    | 6844   | 2173 | 11.3809141  | 10.15206433 | 10.01487824 | 9.595109473 |
| LOC10013 | 1E+08  | 4033 | 6.132091826 | 6.685533066 | 5.919954881 | 6.67568529  |
| URGCP    | 55665  | 3831 | 6.455423214 | 7.270708847 | 6.507857437 | 5.125450198 |
| SNIP1    | 79753  | 2531 | 9.771128539 | 8.716094741 | 9.266143228 | 14.47634302 |
| TUBE1    | 51175  | 2314 | 10.68743575 | 9.629761657 | 9.404637174 | 5.948644201 |
| TAP1     | 6890   | 2974 | 8.315644362 | 10.71455075 | 5.754561422 | 190.9256761 |
| FAM73A   | 374986 | 5292 | 4.67322871  | 4.50549835  | 3.313801057 | 4.628475514 |
| ZNF140   | 7699   | 3067 | 8.063490816 | 8.137352687 | 7.371199695 | 6.53422153  |
| ARHGAP5  | 394    | 9604 | 2.575044391 | 2.413015328 | 0.79198786  | 2.128833315 |
| ABCC5    | 10057  | 5851 | 4.226752065 | 2.05656554  | 2.636094271 | 1.314697794 |
| FAM45A   | 404636 | 2192 | 11.28226566 | 6.201092048 | 8.000289778 | 7.942008309 |
| APOPT1   | 84334  | 1244 | 19.88000509 | 16.65871357 | 17.83352085 | 11.39069165 |
| SPRY1    | 10252  | 2612 | 9.389869895 | 19.62156106 | 15.12643582 | 15.42241337 |
| B3GNT5   | 84002  | 4131 | 5.937143589 | 17.96254757 | 5.370346149 | 16.41579983 |
| FAM82A2  | 55177  | 2251 | 10.89575307 | 12.67107226 | 13.14076703 | 14.02883279 |
| ARV1     | 64801  | 1450 | 16.91471736 | 14.90673822 | 14.2799356  | 11.3080951  |
| SGPL1    | 8879   | 5783 | 4.241110179 | 3.429380761 | 5.918750016 | 5.880693235 |
| SHQ1     | 55164  | 2861 | 8.572645986 | 8.100174489 | 9.895895848 | 4.386784167 |
| SKA1     | 220134 | 2938 | 8.347971465 | 7.963727671 | 7.766764543 | 4.823015795 |
| FOSL1    | 8061   | 1668 | 14.70404087 | 7.080415043 | 15.96035967 | 11.52922181 |
| ZSCAN12  | 9753   | 4367 | 5.616290397 | 5.153675557 | 5.031741512 | 5.423443317 |
| JAK2     | 3717   | 5285 | 4.640745537 | 11.76354192 | 4.03779771  | 40.98370546 |
| LGR4     | 55366  | 5248 | 4.673464208 | 3.651602684 | 3.502624664 | 1.465757773 |
| MAP3K13  | 9175   | 9945 | 2.466198106 | 2.599154493 | 2.018305915 | 3.093935361 |
| YRDC     | 79693  | 1871 | 13.10867994 | 11.19522842 | 13.66405993 | 10.06193707 |

|           |        |      |             |             |             |             |
|-----------|--------|------|-------------|-------------|-------------|-------------|
| CDKN2AIP  | 91368  | 1270 | 19.31207887 | 11.75574006 | 21.12847614 | 8.925997107 |
| SCRN3     | 79634  | 3071 | 7.98643444  | 6.602987402 | 6.604798792 | 4.350473772 |
| TMBIM4    | 51643  | 1831 | 13.39505197 | 26.40889819 | 15.92424744 | 30.1819113  |
| NFE2L3    | 9603   | 3720 | 6.593102195 | 4.073285635 | 7.781186104 | 5.713717906 |
| TSC22D2   | 9819   | 3901 | 6.28719307  | 5.026730648 | 5.741139376 | 9.59993326  |
| RSPRY1    | 89970  | 2084 | 11.76887724 | 15.1834171  | 13.88964122 | 15.63869815 |
| ABHD15    | 116236 | 3365 | 7.288659782 | 7.218057247 | 8.350928161 | 3.789901446 |
| MAPK7     | 5598   | 3183 | 7.705416326 | 8.050819587 | 7.699978736 | 10.93866303 |
| BCL7C     | 9274   | 877  | 27.96618035 | 28.71162301 | 34.6921387  | 13.84918105 |
| NFIL3     | 4783   | 2104 | 11.65700578 | 7.837271231 | 11.44793859 | 40.69743775 |
| LOC653075 | 653075 | 3471 | 7.066073225 | 10.52853941 | 9.982915835 | 5.773684077 |
| ITGAV     | 3685   | 7047 | 3.480394518 | 4.521792808 | 4.647245354 | 3.705594341 |
| MAP4K1    | 11184  | 2786 | 8.803424323 | 5.438845141 | 9.858944356 | 1.380527063 |
| C2orf56   | 55471  | 2221 | 11.04292668 | 9.130019951 | 10.9400034  | 8.749739236 |
| UROD      | 7389   | 1458 | 16.82190683 | 16.35329031 | 16.52020768 | 8.608086079 |
| ZC3HAV1L  | 92092  | 1802 | 13.61062162 | 6.801219568 | 11.37326407 | 3.145398536 |
| TRAK2     | 66008  | 6527 | 3.726360349 | 3.311593446 | 5.697275624 | 4.093857808 |
| ZNF787    | 126208 | 1945 | 12.50486067 | 13.1751973  | 12.3837855  | 12.38510781 |
| ZNF302    | 55900  | 2665 | 9.126436772 | 7.776149974 | 7.293882944 | 6.076663804 |
| PARP10    | 84875  | 3525 | 6.899845106 | 11.63155007 | 5.514382424 | 63.28414382 |
| ATG4C     | 84938  | 2738 | 8.883109568 | 6.429431006 | 7.176582471 | 4.509919883 |
| COG8      | 84342  | 2522 | 9.643915146 | 8.393776784 | 9.131657014 | 5.618564793 |
| FAM135A   | 57579  | 5950 | 4.087723361 | 5.243121994 | 3.97712492  | 11.53334194 |
| PGS1      | 9489   | 2206 | 11.02536446 | 20.80849187 | 11.49327804 | 24.13363144 |
| AGAP6     | 414189 | 2772 | 8.774153679 | 7.154440455 | 6.707452742 | 3.651314267 |
| BRPF3     | 27154  | 6054 | 4.017501486 | 5.926009621 | 5.479304185 | 10.56615803 |
| MRPL1     | 65008  | 1377 | 17.66300218 | 19.74261985 | 24.70359229 | 15.28874491 |
| SYT11     | 23208  | 5298 | 4.590780294 | 3.070363531 | 3.868369545 | 6.380826748 |
| TOE1      | 114034 | 2408 | 10.10047923 | 11.01208035 | 8.335569904 | 4.875778261 |
| HTRA2     | 27429  | 2550 | 9.538021175 | 5.767434193 | 8.699960762 | 2.381516035 |
| TMEM222   | 84065  | 1870 | 13.00639251 | 12.15451008 | 15.59213747 | 11.04157434 |
| DCAF4     | 26094  | 2568 | 9.471165887 | 4.772506877 | 7.65166776  | 1.734203655 |
| ICAM1     | 3383   | 3249 | 7.485981532 | 429.410723  | 33.29572109 | 1101.427344 |
| CA2       | 760    | 1666 | 14.599012   | 0.401259336 | 3.043718051 | 7.897884809 |
| SDC2      | 6383   | 3485 | 6.979039884 | 0.255762048 | 19.09747484 | 0.406600299 |
| ZDHHC13   | 54503  | 2448 | 9.935438724 | 14.38217491 | 11.04756922 | 14.80178369 |
| C7orf70   | 84792  | 2229 | 10.91159892 | 7.297795418 | 10.90073915 | 8.990783954 |
| FGFR1     | 2260   | 5963 | 4.044535943 | 1.046338282 | 3.436964926 | 0.848687167 |
| PDIK1L    | 149420 | 4361 | 5.530283841 | 3.116898365 | 4.215036514 | 2.181645622 |
| SNX25     | 83891  | 3237 | 7.450592471 | 3.992677082 | 7.245167906 | 2.81411765  |
| SELK      | 58515  | 832  | 28.98746133 | 21.15839194 | 28.44217941 | 23.11387257 |
| LAPTM4A   | 9741   | 1783 | 13.52639811 | 16.24691476 | 18.95993372 | 25.65839766 |
| NXT2      | 55916  | 2692 | 8.958977648 | 7.035950298 | 6.985268856 | 8.647592585 |
| C14orf126 | 112487 | 2696 | 8.945685397 | 5.207143597 | 7.366753549 | 1.802037356 |
| MZT2A     | 653784 | 708  | 34.06436134 | 38.71245794 | 39.39207415 | 28.59164731 |
| ADAP1     | 11033  | 2338 | 10.31546956 | 5.909164437 | 10.21179557 | 8.658206286 |
| GALK1     | 2584   | 1361 | 17.72047599 | 15.06290007 | 16.76616769 | 6.990563232 |
| NFIC      | 4782   | 2401 | 10.04480126 | 14.38528369 | 10.38384083 | 8.51533326  |
| C7orf26   | 79034  | 1913 | 12.60719698 | 14.56042111 | 12.37004353 | 8.042129422 |
| WDR90     | 197335 | 5541 | 4.352565932 | 5.107336395 | 3.469935622 | 1.351717728 |
| PTRH2     | 51651  | 804  | 29.99697491 | 20.78663104 | 29.95828706 | 14.35129999 |
| HCFC1R1   | 54985  | 1000 | 24.11756783 | 20.05494163 | 21.76233042 | 12.5505895  |
| PARP12    | 64761  | 3805 | 6.338388391 | 4.685049876 | 4.997537062 | 54.21156672 |
| TAF3      | 83860  | 2790 | 8.644289544 | 6.229730971 | 9.087516618 | 6.022077285 |
| C3AR1     | 719    | 1985 | 12.14990823 | 28.62586126 | 23.52339157 | 170.4073703 |
| TIGD7     | 91151  | 3435 | 6.961624938 | 4.346372599 | 5.289807708 | 3.653737847 |
| SPPL2A    | 84888  | 2010 | 11.8971053  | 23.72447489 | 14.19076755 | 51.06041469 |
| PDSS2     | 57107  | 3568 | 6.702124905 | 10.36721571 | 7.757372124 | 5.559985586 |
| SPAG7     | 9552   | 1038 | 23.03774727 | 18.89140295 | 19.74433704 | 17.16159917 |
| CCDC146   | 57639  | 3333 | 7.174671966 | 6.685649107 | 5.134733174 | 12.87576326 |
| NDUFAF1   | 51103  | 1474 | 16.22332541 | 14.81519885 | 18.77768232 | 10.43730908 |
| ZNF814    | 730051 | 6283 | 3.806013315 | 5.461759263 | 3.90084869  | 3.640690994 |

|          |        |      |             |             |             |             |
|----------|--------|------|-------------|-------------|-------------|-------------|
| SMYD4    | 114826 | 4349 | 5.498547174 | 5.687382848 | 3.983754985 | 3.816777825 |
| SCOC     | 60592  | 2009 | 11.90302721 | 8.984294407 | 9.360051648 | 6.650226458 |
| C5orf44  | 80006  | 3120 | 7.664481302 | 7.142073229 | 8.19405645  | 7.850606544 |
| CLEC5A   | 23601  | 3524 | 6.785806374 | 5.501260946 | 1.858634393 | 13.72885875 |
| NPRL2    | 10641  | 1672 | 14.30214214 | 11.72803604 | 15.16397809 | 6.658844176 |
| EXOC8    | 149371 | 5099 | 4.689778714 | 5.462656519 | 5.055254145 | 7.463547016 |
| NEDD9    | 4739   | 4745 | 5.039658938 | 7.185121342 | 14.69419837 | 20.69083215 |
| APPL2    | 55198  | 3289 | 7.270654199 | 7.520349044 | 4.304067805 | 6.154723714 |
| TMEM143  | 55260  | 2265 | 10.5576961  | 10.72351551 | 9.141680624 | 7.864785845 |
| FAM103A1 | 83640  | 1220 | 19.60096857 | 20.09147158 | 13.68155422 | 21.73621397 |
| CHST12   | 55501  | 2093 | 11.42531374 | 9.58191191  | 19.07922594 | 23.88912047 |
| ZNF320   | 162967 | 6145 | 3.891486031 | 2.538370697 | 3.266403959 | 2.174174932 |
| NFKBIE   | 4794   | 2581 | 9.265083945 | 19.1665463  | 7.85871255  | 25.64674087 |
| NECAP1   | 25977  | 2600 | 9.197377562 | 13.28425621 | 10.23918459 | 31.53218827 |
| ACACB    | 32     | 9260 | 2.582417026 | 2.743296551 | 2.258875958 | 1.267912965 |
| C18orf25 | 147339 | 5473 | 4.369300504 | 4.478639744 | 4.246541887 | 6.176798851 |
| RFXANK   | 8625   | 1438 | 16.62947264 | 19.83489822 | 25.41882039 | 25.05725842 |
| FAM172A  | 83989  | 4720 | 5.023049893 | 6.798285297 | 4.924009269 | 3.045010439 |
| C21orf58 | 54058  | 2991 | 7.926711967 | 8.567622449 | 5.015452376 | 1.556624489 |
| C10orf88 | 80007  | 3102 | 7.643067535 | 5.387637445 | 5.925781508 | 4.502769679 |
| FAM129A  | 116496 | 6926 | 3.42315846  | 3.249509263 | 7.84004962  | 11.69095368 |
| C10orf28 | 27291  | 3386 | 7.002006938 | 10.52960117 | 8.923130796 | 15.60364242 |
| ARL11    | 115761 | 3760 | 6.305530716 | 11.79353837 | 6.462166903 | 18.89694971 |
| OSTM1    | 28962  | 4467 | 5.307543204 | 9.278459674 | 6.527265965 | 22.25040782 |
| PGGT1B   | 5229   | 2727 | 8.694094424 | 12.66559081 | 9.374938073 | 12.91625308 |
| NDUFB6   | 4712   | 873  | 27.15784134 | 18.37795338 | 26.13832099 | 11.36198658 |
| EPB41L5  | 57669  | 6621 | 3.580848134 | 1.783738452 | 4.276115092 | 2.079015659 |
| CISD3    | 284106 | 2636 | 8.994231978 | 8.284371436 | 9.297811957 | 4.377255383 |
| ZBTB43   | 23099  | 5974 | 3.968663457 | 3.767342009 | 4.527025352 | 7.827430087 |
| BARD1    | 580    | 2610 | 9.083829691 | 5.890979022 | 7.366633442 | 5.816921349 |
| PTPN3    | 5774   | 8783 | 2.699396048 | 0.329821804 | 1.419310136 | 0.368764865 |
| RAB18    | 22931  | 2809 | 8.440297434 | 12.4545146  | 11.88429772 | 13.04365404 |
| PHF16    | 9767   | 4932 | 4.80713615  | 2.394592922 | 5.055069311 | 0.985055294 |
| ZDHHC8   | 29801  | 5029 | 4.714415489 | 1.196357623 | 4.705486831 | 0.925803112 |
| SAP30    | 8819   | 1126 | 21.05576864 | 9.103289075 | 23.83051927 | 5.033755029 |
| RBBP9    | 10741  | 3871 | 6.12472113  | 3.511442462 | 4.421096789 | 1.777985363 |
| ECE1     | 1889   | 5259 | 4.508232647 | 2.923646177 | 8.798509743 | 41.10934125 |
| C1orf216 | 127703 | 2934 | 8.080707394 | 5.468286742 | 6.121065002 | 3.035743003 |
| CORO1B   | 57175  | 1927 | 12.30347457 | 43.71082244 | 11.40301774 | 103.9982223 |
| ZNF493   | 284443 | 4955 | 4.784822501 | 4.856898073 | 4.39199403  | 4.534733358 |
| C1orf112 | 55732  | 3363 | 7.049894586 | 6.228448518 | 6.596758829 | 3.671769444 |
| CDC14A   | 8556   | 4287 | 5.530393164 | 6.289422639 | 5.0270692   | 5.760746741 |
| MIF4GD   | 57409  | 1433 | 16.54486776 | 14.92807937 | 11.50049643 | 7.769426003 |
| CHCHD1   | 118487 | 844  | 28.09098992 | 26.66599663 | 30.54116219 | 21.82586082 |
| GGT1     | 2678   | 2431 | 9.752692511 | 14.0244347  | 12.42851537 | 13.82278538 |
| STAC3    | 246329 | 1643 | 14.43018594 | 36.21200659 | 13.50267799 | 87.10724657 |
| TRAF6    | 7189   | 8040 | 2.923433996 | 2.965559362 | 3.1797831   | 3.575236137 |
| ATRIP    | 84126  | 2509 | 9.36803879  | 6.661000939 | 12.96845486 | 3.953373569 |
| CHI3L1   | 1116   | 1867 | 12.58939975 | 2.625773468 | 25.12330853 | 22.87760583 |
| SCAND2   | 54581  | 4509 | 5.212776519 | 5.48556842  | 5.013854395 | 3.816024252 |
| POLR3F   | 10621  | 2177 | 10.79669698 | 9.314549523 | 10.67584922 | 6.787922368 |
| LSM1     | 27257  | 935  | 25.1384057  | 25.73896252 | 24.85703075 | 24.89766764 |
| IFFO1    | 25900  | 2816 | 8.346736266 | 11.63224597 | 7.728100291 | 11.71729569 |
| WDR37    | 22884  | 4611 | 5.097464612 | 5.654180029 | 5.223696117 | 7.638825017 |
| FAM72D   | 728833 | 2393 | 9.822151828 | 5.307757221 | 7.328305555 | 2.537762595 |
| NUBP2    | 10101  | 1399 | 16.80086442 | 13.37951788 | 18.57614414 | 6.655988346 |
| TDRD3    | 81550  | 3032 | 7.752113893 | 10.06862725 | 8.780303407 | 6.209064728 |
| LZTR1    | 8216   | 4332 | 5.425763925 | 3.755029083 | 5.365033183 | 2.66353767  |
| TMEM120  | 144404 | 7510 | 3.129748246 | 1.928645074 | 2.78524519  | 1.536410811 |
| EPX      | 8288   | 2731 | 8.606521174 | 9.709662938 | 140.4954693 | 37.58016606 |
| COMMD4   | 54939  | 969  | 24.25635637 | 26.90549444 | 25.29311901 | 23.60625543 |
| ZNF746   | 155061 | 3816 | 6.159436406 | 6.656951274 | 5.536812405 | 4.72121824  |

|           |        |      |             |             |             |             |
|-----------|--------|------|-------------|-------------|-------------|-------------|
| UTP15     | 84135  | 3655 | 6.430754945 | 5.182155459 | 8.382021997 | 2.713820598 |
| MRPS6     | 64968  | 1017 | 23.11151359 | 72.74380662 | 33.65597969 | 108.2805324 |
| RNF113A   | 7737   | 1312 | 17.91494613 | 31.08108331 | 19.48586595 | 31.47521954 |
| PDCL      | 5082   | 3085 | 7.618933331 | 7.728718725 | 8.697946416 | 6.364862142 |
| POLI      | 11201  | 6074 | 3.869675556 | 3.88874952  | 4.069857932 | 3.132748291 |
| ALG1      | 56052  | 3946 | 5.956515288 | 4.856464999 | 7.656796978 | 2.359789077 |
| TYW1      | 55253  | 3344 | 7.02883054  | 7.063476251 | 8.08745498  | 5.569215129 |
| ETFDH     | 2110   | 2349 | 10.00613424 | 10.52976927 | 11.69306896 | 8.790014483 |
| MED20     | 9477   | 2478 | 9.402753494 | 7.463725922 | 10.91382141 | 6.616924092 |
| TMEM128   | 85013  | 1750 | 13.31429895 | 11.96929849 | 11.95268079 | 13.07112087 |
| TBC1D25   | 4943   | 3830 | 6.08355696  | 4.014479177 | 5.406241936 | 3.435476786 |
| NT5C      | 30833  | 970  | 24.02064243 | 22.05354406 | 28.09869507 | 18.78205945 |
| XRCC4     | 7518   | 1735 | 13.42940816 | 9.247235332 | 12.05601808 | 7.817137647 |
| CD58      | 965    | 1395 | 16.70252556 | 24.91892389 | 19.68961934 | 45.27441236 |
| SCAPER    | 49855  | 4874 | 4.780472539 | 6.034861384 | 3.207852347 | 5.81453443  |
| BAX       | 581    | 986  | 23.63085513 | 29.15356626 | 23.78560701 | 25.25228209 |
| DUSP12    | 11266  | 1271 | 18.33204025 | 16.65547211 | 20.44691239 | 8.122637302 |
| HIC2      | 23119  | 6812 | 3.420437927 | 2.257113219 | 3.504870528 | 2.466470291 |
| OTUD3     | 23252  | 6523 | 3.571979635 | 2.596241613 | 3.401027126 | 1.675787    |
| ENOSF1    | 55556  | 5406 | 4.310030181 | 4.905121991 | 3.595671115 | 3.145398536 |
| MTHFR     | 4524   | 7150 | 3.258744497 | 6.420074553 | 3.220984474 | 7.644166853 |
| CHURC1    | 91612  | 3635 | 6.409910084 | 8.52097474  | 7.788764243 | 9.077277761 |
| C6orf108  | 10591  | 813  | 28.65931508 | 18.08973824 | 20.79062842 | 8.465659705 |
| SLC35A2   | 7355   | 2619 | 8.896534233 | 9.954724748 | 9.761533457 | 10.8209396  |
| FAM188A   | 80013  | 2375 | 9.810536066 | 11.07126602 | 9.163086493 | 9.801818627 |
| KIAA1958  | 158405 | 2683 | 8.684317241 | 4.318784796 | 8.268691742 | 8.601151836 |
| C3orf38   | 285237 | 2782 | 8.301810564 | 11.13362444 | 10.40474921 | 20.73768007 |
| RCBTB2    | 1102   | 3204 | 7.208376089 | 12.31004532 | 7.253846364 | 14.84731049 |
| MIIP      | 60672  | 1588 | 14.54385201 | 15.99680482 | 13.43813659 | 11.85509084 |
| PPP1R27   | 116729 | 805  | 28.69023228 | 14.394161   | 88.97581876 | 20.36861851 |
| P2RX4     | 5025   | 2043 | 11.30476602 | 12.21598663 | 11.89317061 | 72.43049379 |
| DUSP2     | 1844   | 1708 | 13.52203571 | 8.741094776 | 16.69990795 | 17.42215624 |
| NDFIP1    | 80762  | 3599 | 6.417237285 | 9.03961433  | 11.09553206 | 8.943092306 |
| OSGEP     | 55644  | 1642 | 14.06555237 | 18.86342459 | 11.9667983  | 8.506450392 |
| TRIM38    | 10475  | 3286 | 7.028495736 | 20.14038569 | 7.65151753  | 112.672669  |
| ZSWIM6    | 57688  | 5519 | 4.184750315 | 3.553048787 | 3.904882344 | 13.71777401 |
| BIN3      | 55909  | 1863 | 12.39701395 | 16.5061248  | 14.06296855 | 21.51417867 |
| EME1      | 146956 | 2371 | 9.740884432 | 6.954710532 | 9.089433007 | 3.671210927 |
| LOC64340  | 643406 | 3799 | 6.079399049 | 7.214640754 | 6.562674873 | 8.898557545 |
| NR2F6     | 2063   | 1804 | 12.80245953 | 13.09327305 | 12.41473653 | 7.854778496 |
| ZKSCAN2   | 342357 | 7142 | 3.233777232 | 2.589626552 | 3.668343658 | 2.040727826 |
| ZMYM5     | 9205   | 3268 | 7.067208381 | 8.659654517 | 7.370398652 | 11.76911994 |
| COL27A1   | 85301  | 5583 | 4.13677897  | 0.957905147 | 1.551616553 | 0.797677769 |
| PHPT1     | 29085  | 1273 | 18.1426842  | 17.67957672 | 17.59323229 | 6.2016698   |
| TMEM219   | 124446 | 1019 | 22.66500195 | 34.76977122 | 22.39328187 | 82.0442791  |
| CTAGE5    | 4253   | 3680 | 6.275988312 | 6.902969038 | 7.980592888 | 14.90712551 |
| MFHAS1    | 9258   | 5255 | 4.394983252 | 1.696157448 | 4.905183803 | 2.003101974 |
| ALDH3B1   | 221    | 2899 | 7.966759913 | 23.05960863 | 11.07805579 | 16.06024094 |
| UBA7      | 7318   | 3330 | 6.935626723 | 21.1456842  | 6.027643342 | 76.53391545 |
| RPS19BP1  | 91582  | 952  | 24.26012289 | 24.57713435 | 27.96415959 | 21.26353602 |
| FAM115A   | 9747   | 5748 | 4.018030095 | 3.295194538 | 2.867120979 | 2.324339763 |
| RBM47     | 54502  | 5160 | 4.436288919 | 7.255017643 | 6.633358787 | 56.72715811 |
| C12orf43  | 64897  | 1920 | 11.92252647 | 7.891990918 | 14.85595978 | 5.482448372 |
| IER5      | 51278  | 2350 | 9.740957796 | 10.05117642 | 9.170657727 | 27.22022157 |
| TRIP4     | 9325   | 2057 | 11.12846418 | 9.641278047 | 11.81222536 | 17.02488736 |
| FLJ10038  | 55056  | 5944 | 3.851152561 | 3.074071357 | 2.737033416 | 2.690423986 |
| RAB27B    | 5874   | 1365 | 16.77014712 | 9.794843285 | 13.77607602 | 7.711575732 |
| C14orf169 | 79697  | 2463 | 9.294052302 | 8.413901616 | 11.32342205 | 3.780644619 |
| PTCH1     | 5727   | 8065 | 2.838344801 | 1.353850161 | 3.143728625 | 1.179684632 |
| XYLT1     | 64131  | 9336 | 2.451933464 | 0.358021666 | 4.00572009  | 0.845621857 |
| REXO2     | 25996  | 1171 | 19.54846355 | 8.182583641 | 17.501812   | 3.111630686 |
| FANCE     | 2178   | 2565 | 8.924464258 | 4.864963098 | 7.166383719 | 1.972990867 |

|          |        |      |             |             |             |             |
|----------|--------|------|-------------|-------------|-------------|-------------|
| TDRD7    | 23424  | 3785 | 6.047886611 | 10.36157266 | 6.810235373 | 45.3526224  |
| WDR44    | 54521  | 4160 | 5.502704524 | 8.356225678 | 5.33290864  | 15.27948629 |
| PLXNB2   | 23654  | 6369 | 3.594167188 | 2.798966051 | 4.578002366 | 1.716306893 |
| USP30    | 84749  | 3766 | 6.07839905  | 5.443602495 | 6.171355218 | 4.837652062 |
| PI4K2A   | 55361  | 4185 | 5.420995138 | 4.046662853 | 5.906885801 | 9.045208452 |
| LDLRAP1  | 26119  | 2935 | 7.729766492 | 4.63127556  | 8.710547232 | 3.51750324  |
| RPS6KA5  | 9252   | 3883 | 5.842612581 | 5.796060046 | 5.005974258 | 5.213207905 |
| POFUT2   | 23275  | 4843 | 4.684465136 | 3.726914612 | 5.278847021 | 4.723200808 |
| RNASEL   | 6041   | 4258 | 5.328056518 | 4.238949616 | 5.359031054 | 10.03111557 |
| CCDC61   | 729440 | 1825 | 12.43115871 | 10.1343084  | 10.07220506 | 4.880476696 |
| SYS1     | 90196  | 2967 | 7.646398602 | 10.21410351 | 9.399928716 | 7.368492484 |
| FGFBP3   | 143282 | 2564 | 8.848231144 | 1.998889138 | 16.56327497 | 0.473702487 |
| HIP1R    | 9026   | 4473 | 5.071957222 | 9.016927328 | 5.809976671 | 7.421939084 |
| PTGR2    | 145482 | 2610 | 8.692285308 | 5.976355529 | 6.799969331 | 3.800388615 |
| NTPCR    | 84284  | 926  | 24.49985384 | 9.625601933 | 11.18029515 | 6.995381873 |
| ZNF184   | 7738   | 3119 | 7.208232922 | 5.358272317 | 6.774118671 | 2.920583146 |
| ZBTB10   | 65986  | 6061 | 3.709367841 | 2.573550228 | 3.346533095 | 2.170908446 |
| GTPBP5   | 26164  | 2949 | 7.623763474 | 9.218578345 | 8.096025105 | 9.060905361 |
| ZNRF2    | 223082 | 3485 | 6.451213339 | 6.969515821 | 7.638989937 | 12.72078077 |
| C1orf186 | 440712 | 1665 | 13.50299008 | 2.81050233  | 57.10398956 | 7.416312697 |
| FAM206A  | 54942  | 1925 | 11.6792096  | 11.45996664 | 11.96365662 | 7.886838816 |
| ANKRD13B | 124930 | 3203 | 7.019194032 | 3.200219637 | 5.145242393 | 0.505598159 |
| LCMT1    | 51451  | 1374 | 16.36279366 | 14.59602738 | 16.45376235 | 17.82670482 |
| TRAPPC9  | 83696  | 4480 | 5.018410376 | 5.570817119 | 4.716177709 | 4.021466251 |
| ZNF434   | 54925  | 3044 | 7.385833931 | 6.368739676 | 7.704536305 | 6.184587469 |
| DUS4L    | 11062  | 2252 | 9.983338581 | 7.520108366 | 8.631526663 | 5.39330896  |
| ENC1     | 8507   | 5559 | 4.044338637 | 0.481020366 | 3.572723074 | 0.873950838 |
| STAM     | 8027   | 3882 | 5.791467925 | 5.625348559 | 6.150226181 | 6.987498103 |
| ZNF689   | 115509 | 2724 | 8.25347962  | 6.871492481 | 6.515389117 | 5.722108094 |
| CCDC71   | 64925  | 1851 | 12.1461256  | 15.04812836 | 11.41462784 | 13.77959845 |
| STX10    | 8677   | 750  | 29.97663798 | 25.25437094 | 33.24213579 | 22.9419378  |
| GJC1     | 10052  | 7644 | 2.941192894 | 1.224355411 | 3.068106817 | 0.767979726 |
| TXNDC15  | 79770  | 3689 | 6.094464214 | 7.550578908 | 6.64381467  | 5.158122287 |
| HIBCH    | 26275  | 1958 | 11.37798382 | 8.53547056  | 9.280127414 | 4.445577685 |
| FLYWCH1  | 84256  | 5009 | 4.44761276  | 4.359673209 | 4.59773188  | 4.20295503  |
| PLS1     | 5357   | 3880 | 5.74177637  | 4.881643867 | 5.064299692 | 4.121618601 |
| CHCHD10  | 400916 | 749  | 29.74378146 | 61.5839329  | 27.362646   | 39.45876367 |
| ZNF346   | 23567  | 3089 | 7.212072618 | 7.069473326 | 6.976706267 | 5.111509003 |
| TRIM11   | 81559  | 2715 | 8.205558864 | 15.26588558 | 9.105089164 | 12.30230659 |
| TEX264   | 51368  | 1434 | 15.53562923 | 19.42404853 | 16.20733874 | 16.9396538  |
| THAP6    | 152815 | 3578 | 6.226409256 | 4.54633482  | 5.491750365 | 5.6010222   |
| ST6GAL1  | 6480   | 4604 | 4.838855846 | 2.032791651 | 8.076915291 | 3.517443318 |
| RABGGTA  | 5875   | 2218 | 10.04422557 | 12.25680232 | 8.668581282 | 19.98734039 |
| KLHL2    | 11275  | 3137 | 7.101718941 | 6.108897318 | 7.274068928 | 8.711474816 |
| MOSC1    | 64757  | 2258 | 9.866294206 | 1.38160212  | 11.13502507 | 0.358598517 |
| RAB12    | 201475 | 2138 | 10.42006189 | 12.29852984 | 8.597649316 | 14.01284926 |
| TPCN2    | 219931 | 5026 | 4.432569104 | 5.497662735 | 4.245873637 | 4.873436613 |
| TRPV2    | 51393  | 2829 | 7.874900077 | 10.00344679 | 5.974825348 | 18.96205326 |
| TRIM35   | 23087  | 4227 | 5.270426382 | 6.694996679 | 5.348348584 | 6.46508079  |
| TMEM138  | 51524  | 1868 | 11.92617362 | 20.87565301 | 13.9122193  | 8.994430206 |
| COQ10B   | 80219  | 1989 | 11.20064973 | 15.23642289 | 13.38455502 | 37.14757917 |
| PRDM15   | 63977  | 6654 | 3.34807519  | 2.91350219  | 3.270563634 | 1.703639364 |
| RECQL5   | 9400   | 3733 | 5.967879003 | 5.790187629 | 6.169311275 | 6.615676743 |
| DCAKD    | 79877  | 2133 | 10.44448772 | 8.462000686 | 10.20268655 | 3.511424252 |
| NAT6     | 24142  | 1497 | 14.88182519 | 16.22495834 | 19.05373599 | 5.949812939 |
| SNAP47   | 116841 | 2388 | 9.329184387 | 6.53194637  | 7.874515813 | 3.560306635 |
| PLAUR    | 5329   | 1570 | 14.18986772 | 11.35453171 | 12.38101786 | 81.61622309 |
| SNAPIN   | 23557  | 1047 | 21.27802514 | 20.64447987 | 22.19801695 | 22.23430682 |
| KLHDC4   | 54758  | 1944 | 11.45992403 | 8.138436531 | 9.781701915 | 3.956942794 |
| PDLIM5   | 10611  | 6101 | 3.651547667 | 11.94333518 | 4.121109097 | 22.59532137 |
| LRSAM1   | 90678  | 3383 | 6.585306626 | 6.059889742 | 4.933933239 | 5.98370863  |
| PPP1R16A | 84988  | 2326 | 9.577855682 | 6.801857531 | 7.176051654 | 3.046006106 |



|          |        |      |             |             |             |             |
|----------|--------|------|-------------|-------------|-------------|-------------|
| LMO7     | 4008   | 7253 | 3.071569325 | 1.474695832 | 2.796544477 | 1.172206293 |
| SIRT5    | 23408  | 3927 | 5.621009969 | 9.703180313 | 4.896081814 | 12.06222407 |
| ADM      | 133    | 1449 | 15.23375166 | 6.305134627 | 21.58050013 | 50.9913975  |
| MFSD2A   | 84879  | 2236 | 9.871961605 | 12.85573181 | 9.354736751 | 10.32061287 |
| ANKRD32  | 84250  | 3813 | 5.789065342 | 5.785585048 | 6.760225777 | 4.353308881 |
| DLEU1    | 10301  | 874  | 25.25595669 | 12.74786526 | 18.8560771  | 4.400627456 |
| SLC25A17 | 10478  | 2279 | 9.685698178 | 5.377708495 | 7.973009863 | 2.931177041 |
| SIVA1    | 10572  | 790  | 27.94140019 | 18.33433482 | 30.75664248 | 10.50580175 |
| LOC72985 | 729852 | 2286 | 9.656039435 | 11.69725379 | 10.07438276 | 8.589501184 |
| NDUFS7   | 374291 | 799  | 27.62666602 | 29.84117305 | 26.17921323 | 25.8419825  |
| TXNDC16  | 57544  | 4651 | 4.746012932 | 3.497481399 | 4.270214485 | 1.697425426 |
| DAB2IP   | 153090 | 5472 | 4.033937527 | 0.162889389 | 3.011734537 | 0.369935788 |
| SLC12A4  | 6560   | 4773 | 4.624702734 | 5.929132823 | 4.736532467 | 6.022396509 |
| UBE2W    | 55284  | 4057 | 5.440893801 | 9.886586949 | 5.259985432 | 18.51148833 |
| AACS     | 65985  | 3341 | 6.606915938 | 5.269015892 | 8.727116752 | 5.331858707 |
| STUB1    | 10273  | 1646 | 13.41051406 | 9.88261603  | 13.2213429  | 4.550345036 |
| DDB2     | 1643   | 1870 | 11.80412094 | 10.1287584  | 10.28177181 | 6.278542273 |
| LRIG2    | 9860   | 4015 | 5.497809751 | 3.774003129 | 4.262531923 | 3.680524781 |
| CCPG1    | 9236   | 7089 | 3.113796889 | 1.477378499 | 2.265149085 | 5.111407317 |
| ZNF273   | 10793  | 4414 | 5.000839635 | 7.269575578 | 4.882429918 | 7.06253849  |
| ACAD8    | 27034  | 2216 | 9.961058731 | 7.240051129 | 12.10882883 | 5.298228363 |
| DMAP1    | 55929  | 1784 | 12.37315367 | 16.7374326  | 14.0935463  | 13.04894576 |
| ASL      | 435    | 2061 | 10.71019221 | 15.6772146  | 13.12200362 | 11.5898136  |
| SNHG8    | 1E+08  | 653  | 33.80353162 | 34.46569856 | 34.94449346 | 11.46993557 |
| TMEM19   | 55266  | 4659 | 4.737863522 | 4.352387704 | 4.761729973 | 3.171776561 |
| NPC1     | 4864   | 4827 | 4.530623572 | 7.663191561 | 6.828345302 | 16.06178879 |
| SFI1     | 9814   | 4302 | 5.083523938 | 4.71356911  | 4.616635883 | 3.999640481 |
| TYW5     | 129450 | 5384 | 4.061909357 | 3.766302807 | 3.06096051  | 3.383840577 |
| FRMD8    | 83786  | 3774 | 5.794732374 | 7.557653325 | 6.326226294 | 9.762070233 |
| VPS16    | 64601  | 2769 | 7.897912597 | 9.174043359 | 9.843168731 | 8.260910623 |
| C3orf19  | 51244  | 2975 | 7.351031926 | 9.587423075 | 9.800772124 | 11.15910371 |
| GPKOW    | 27238  | 2975 | 7.351031926 | 7.190567306 | 8.167310103 | 9.458020824 |
| MTMR10   | 54893  | 4969 | 4.401151133 | 5.605571663 | 5.995401761 | 10.59197109 |
| OSBPL7   | 114881 | 3674 | 5.952455085 | 6.368381028 | 6.038350556 | 5.619962989 |
| CDC26    | 246184 | 885  | 24.71109602 | 20.89843258 | 20.53162653 | 28.13418095 |
| ABHD12   | 26090  | 2140 | 10.2193084  | 13.01592785 | 11.84774363 | 18.8239924  |
| POLE4    | 56655  | 710  | 30.80185913 | 19.45862881 | 28.56808041 | 11.40444298 |
| CDKN3    | 1033   | 906  | 24.13832227 | 15.98689239 | 14.45878058 | 5.809216818 |
| RING1    | 6015   | 1744 | 12.5397477  | 14.05481383 | 12.35725095 | 16.366095   |
| ZNF33B   | 7582   | 5958 | 3.670580729 | 5.236081884 | 2.907913802 | 2.310366345 |
| DSTYK    | 25778  | 7926 | 2.759187482 | 2.333473736 | 2.612403055 | 2.273046783 |
| C18orf55 | 29090  | 1562 | 14.00084506 | 8.559514139 | 15.55553621 | 3.369494518 |
| MAPKBP1  | 23005  | 7265 | 3.010229867 | 3.588633739 | 2.762842716 | 3.510810287 |
| COG7     | 91949  | 2943 | 7.430961597 | 6.663022853 | 6.174138456 | 3.645507896 |
| TBCCD1   | 55171  | 3080 | 7.100428565 | 6.511344684 | 7.75168118  | 3.417630154 |
| CCDC76   | 54482  | 3157 | 6.927247381 | 7.905372408 | 7.027209358 | 3.783117806 |
| RRNAD1   | 51093  | 2283 | 9.579202795 | 9.565310164 | 9.995074125 | 8.778124149 |
| KLHL24   | 54800  | 7331 | 2.955249463 | 2.066924371 | 2.853252131 | 4.114295537 |
| SPR      | 6697   | 1466 | 14.77826317 | 8.512026157 | 11.52986419 | 4.142473321 |
| FUNDC2   | 65991  | 2981 | 7.267673201 | 10.31563586 | 9.072274221 | 6.586917043 |
| C9orf142 | 286257 | 851  | 25.4582066  | 39.01535843 | 21.35192653 | 16.1752793  |
| PARP3    | 10039  | 2360 | 9.1800567   | 10.95279298 | 7.1621953   | 13.98131553 |
| KATNA1   | 11104  | 2051 | 10.56310766 | 8.474378064 | 14.01010607 | 5.132277364 |
| ZNF574   | 64763  | 3167 | 6.840837958 | 4.22164859  | 6.60473362  | 2.301054331 |
| GAS8     | 2622   | 3267 | 6.631445918 | 3.137527854 | 4.721085883 | 1.48708072  |
| INPP5F   | 22876  | 4955 | 4.372337803 | 7.55517478  | 4.519916187 | 9.355440891 |
| ZNF271   | 10778  | 5151 | 4.205966572 | 3.633846926 | 4.265893066 | 2.593730335 |
| ARMC5    | 79798  | 4707 | 4.602705293 | 3.645234061 | 3.950086892 | 2.40833149  |
| ZDHHC9   | 51114  | 4639 | 4.670173273 | 4.707394504 | 4.691168446 | 3.185450958 |
| PSMG3    | 84262  | 1395 | 15.5304185  | 14.53603893 | 19.0837849  | 6.675073617 |
| ERV3-1   | 2086   | 3288 | 6.589091792 | 8.945837709 | 6.425935565 | 9.050195515 |
| NSMCE1   | 197370 | 1079 | 20.0787153  | 28.0864181  | 19.18990418 | 12.5697255  |

|          |        |       |             |             |             |             |
|----------|--------|-------|-------------|-------------|-------------|-------------|
| RALGPS2  | 55103  | 5834  | 3.713564246 | 2.559100082 | 2.969720677 | 1.318528761 |
| CDC37L1  | 55664  | 1724  | 12.56666694 | 10.0817572  | 13.84871116 | 7.98443311  |
| TMEM63B  | 55362  | 3215  | 6.738704141 | 5.059653495 | 6.374687979 | 10.64089513 |
| ALKBH1   | 8846   | 2585  | 8.381018883 | 6.723771532 | 8.990840909 | 6.186413994 |
| DHRS7    | 51635  | 1404  | 15.28529035 | 18.41067766 | 17.45657573 | 19.17595354 |
| HSPB11   | 51668  | 601   | 35.70806596 | 28.54927908 | 40.42886449 | 38.39748815 |
| EMID1    | 129080 | 2062  | 10.40763707 | 2.269392037 | 8.094808995 | 2.061593658 |
| NLRX1    | 79671  | 3761  | 5.706074886 | 8.057762596 | 4.662758626 | 4.036736166 |
| PPARD    | 5467   | 3845  | 5.581416813 | 7.649912714 | 8.517331082 | 15.16242198 |
| PCGF1    | 84759  | 939   | 22.85468333 | 16.13697823 | 19.57590441 | 15.52170195 |
| RPL23AP5 | 644128 | 5811  | 3.693090285 | 2.147415306 | 3.199631561 | 1.428253895 |
| PNKP     | 11284  | 1721  | 12.46981269 | 18.9038768  | 11.66301704 | 17.05530804 |
| TMEM237  | 65062  | 5399  | 3.974911584 | 3.632020051 | 5.32223144  | 1.312281942 |
| DUSP16   | 80824  | 6312  | 3.39996002  | 4.201059804 | 2.410092335 | 9.653214155 |
| FAM160B2 | 64760  | 3759  | 5.709110839 | 6.99501378  | 4.21557784  | 5.654437513 |
| SLC38A9  | 153129 | 2554  | 8.402720299 | 9.335590159 | 8.272700132 | 11.49263317 |
| RNF103   | 7844   | 3516  | 6.103682493 | 5.640531553 | 4.146373303 | 10.01781062 |
| CCDC138  | 165055 | 2196  | 9.77256268  | 7.914822136 | 10.4872673  | 2.673240904 |
| SLC35E2  | 9906   | 6308  | 3.402115987 | 4.3450254   | 3.885388763 | 2.823991747 |
| C9orf16  | 79095  | 723   | 29.68263851 | 34.21082712 | 24.54760713 | 23.51870607 |
| ISY1     | 57461  | 3844  | 5.582868794 | 6.434554632 | 6.046130008 | 4.792150502 |
| C11orf51 | 25906  | 882   | 24.33168667 | 24.00125289 | 23.95518836 | 12.85262622 |
| RCHY1    | 25898  | 4475  | 4.795653105 | 4.630936242 | 4.910305069 | 5.111611511 |
| FAM161A  | 84140  | 3871  | 5.543928609 | 3.223619309 | 6.331447253 | 2.091747486 |
| ABTB2    | 25841  | 4919  | 4.362786673 | 0.362403228 | 5.111381704 | 7.654354241 |
| ZNF76    | 7629   | 2671  | 8.034649062 | 9.42721579  | 7.673014546 | 6.669314841 |
| WARS2    | 10352  | 2835  | 7.569858076 | 6.759651107 | 7.452725268 | 1.856490454 |
| PARD3    | 56288  | 6013  | 3.569025053 | 1.741748908 | 3.619213441 | 1.885251343 |
| OSTF1    | 26578  | 1313  | 16.3446669  | 31.22712414 | 24.78130484 | 41.4724784  |
| POLB     | 5423   | 1259  | 17.04570901 | 9.203573953 | 16.27849234 | 17.20404157 |
| G2E3     | 55632  | 5581  | 3.845287161 | 2.954599296 | 3.710071065 | 1.632198322 |
| DZIP3    | 9666   | 5568  | 3.854265022 | 7.083582112 | 4.743282179 | 6.544036518 |
| TFB1M    | 51106  | 2818  | 7.615524359 | 6.325981114 | 4.648564657 | 2.586032316 |
| NAA16    | 79612  | 4359  | 4.923273146 | 6.594497897 | 4.944034333 | 3.529386002 |
| GINS3    | 64785  | 2414  | 8.890036307 | 8.030838265 | 9.10257464  | 3.186535539 |
| TNFSF10  | 8743   | 1953  | 10.98850366 | 5.590784205 | 19.04051101 | 229.2742677 |
| FANCC    | 2176   | 4612  | 4.653197668 | 4.010215272 | 3.710768792 | 2.194588714 |
| FRS2     | 10818  | 6882  | 3.118359146 | 2.719840965 | 2.885900548 | 3.353224408 |
| ZNF189   | 7743   | 3280  | 6.542849892 | 6.861616207 | 5.604199463 | 7.03563731  |
| C19orf70 | 125988 | 943   | 22.75773875 | 17.95894384 | 24.42209861 | 6.439942618 |
| SSCA1    | 10534  | 661   | 32.15758166 | 24.27224403 | 33.88227641 | 15.92481221 |
| ZFH3     | 463    | 16064 | 1.323217223 | 1.01262363  | 1.473100926 | 2.028825133 |
| ZBTB48   | 3104   | 2412  | 8.812670596 | 13.30344387 | 10.16129035 | 7.889018706 |
| TPRN     | 286262 | 2641  | 8.048527632 | 9.449928319 | 8.000180286 | 4.445616831 |
| TTC38    | 55020  | 2616  | 8.125443989 | 8.006984849 | 8.076634609 | 10.83334893 |
| CCDC97   | 90324  | 3344  | 6.356507619 | 11.32821663 | 6.634240414 | 12.65180393 |
| LOC40002 | 400027 | 2202  | 9.65311602  | 13.76259997 | 7.963957853 | 4.780336455 |
| KIF3C    | 3797   | 5431  | 3.913857757 | 4.636364091 | 2.373111847 | 9.579123141 |
| TMEM39B  | 55116  | 1834  | 11.59005533 | 8.626565222 | 12.90288619 | 7.505541266 |
| KCNK5    | 8645   | 3800  | 5.593726704 | 5.160335857 | 4.28129648  | 2.983162191 |
| TMEM231  | 79583  | 3034  | 7.005985984 | 3.819149508 | 4.456896746 | 0.934081767 |
| LOC28378 | 283788 | 3680  | 5.776130836 | 6.357997798 | 8.210250238 | 7.426058831 |
| PDCL3    | 79031  | 1086  | 19.5728927  | 10.87489161 | 20.42808466 | 8.574334895 |
| HRSP12   | 10247  | 1011  | 21.02488771 | 12.56326709 | 22.98845079 | 2.80316922  |
| FUNDC1   | 139341 | 1170  | 18.16765938 | 14.47460174 | 14.62740656 | 14.0143059  |
| ZNF672   | 79894  | 2952  | 7.200596706 | 14.11575611 | 10.2350003  | 15.08616187 |
| MLH3     | 27030  | 7911  | 2.686912081 | 1.492874768 | 1.922955735 | 0.997942821 |
| ZNF436   | 80818  | 4493  | 4.730950696 | 1.636652258 | 4.044177493 | 1.802171048 |
| LRR42    | 115353 | 1714  | 12.40149444 | 7.540429239 | 11.46410899 | 5.787056175 |
| LOC10012 | 1E+08  | 1944  | 10.93423944 | 10.08707626 | 13.04226922 | 11.35017802 |
| MC1R     | 4157   | 3115  | 6.823807858 | 0.715353723 | 5.494082077 | 0.454896321 |
| KIAA1530 | 57654  | 4665  | 4.556519073 | 7.499406539 | 4.43856519  | 5.944856211 |

|           |        |      |             |             |             |             |
|-----------|--------|------|-------------|-------------|-------------|-------------|
| LOC728190 | 728190 | 825  | 25.76504421 | 38.89443225 | 31.75673989 | 18.64799222 |
| THAP1     | 55145  | 2189 | 9.710443799 | 7.838335644 | 8.976465421 | 6.935662276 |
| OGDHL     | 55753  | 3774 | 5.578106865 | 2.479854997 | 4.926618707 | 2.574611929 |
| DAK       | 26007  | 4248 | 4.955690986 | 7.2389149   | 4.426634595 | 3.383344932 |
| RBX1      | 9978   | 906  | 23.23595509 | 19.67617525 | 21.22175859 | 19.66196461 |
| WDR20     | 91833  | 3102 | 6.786516863 | 7.039846262 | 8.105379304 | 6.134207968 |
| BET1      | 10282  | 3061 | 6.877417611 | 6.18777465  | 6.005153296 | 5.422792147 |
| CLDN15    | 24146  | 2145 | 9.814347463 | 8.310776121 | 7.683082231 | 5.662345817 |
| VPS28     | 51160  | 1160 | 18.14808216 | 22.66746276 | 14.02493675 | 15.70568764 |
| ZNF43     | 7594   | 5225 | 4.029047906 | 4.648567012 | 3.922415665 | 3.060646923 |
| CROCCP2   | 84809  | 1765 | 11.92735145 | 8.963807715 | 10.41460297 | 5.734528696 |
| C15orf43  | 145645 | 1337 | 15.74553127 | 15.99995343 | 15.96092812 | 7.8730747   |
| METTL21B  | 25895  | 2856 | 7.371069786 | 3.745087139 | 4.0688592   | 3.402165764 |
| HOXA13    | 3209   | 2514 | 8.37381675  | 9.5727645   | 6.723460982 | 3.140304557 |
| GHDC      | 84514  | 2743 | 7.674726689 | 13.32284371 | 8.241877312 | 10.47936513 |
| UBL3      | 5412   | 4355 | 4.833932333 | 9.517079073 | 6.258492357 | 16.36164403 |
| HACE1     | 57531  | 4576 | 4.600475373 | 4.18785203  | 3.832306642 | 2.034905528 |
| RPUSD2    | 27079  | 1839 | 11.44740365 | 5.695016956 | 9.995527046 | 2.972038771 |
| CENPW     | 387103 | 567  | 37.12835151 | 25.54519314 | 37.26362634 | 11.42455664 |
| STEAP3    | 55240  | 4285 | 4.912899722 | 6.552372994 | 6.015575469 | 1.322755697 |
| TP53I13   | 90313  | 1478 | 14.24342037 | 13.11667359 | 14.72417484 | 10.81994599 |
| EXOSC6    | 118460 | 1729 | 12.17569422 | 12.37243362 | 14.29746505 | 7.961343367 |
| ATP6V1D   | 51382  | 1823 | 11.54787455 | 16.99053383 | 12.98074233 | 25.65061291 |
| RAB7L1    | 8934   | 3438 | 6.123262161 | 4.796282336 | 7.497597698 | 12.24700509 |
| FKRP      | 79147  | 3474 | 6.000975573 | 7.184012864 | 5.777792841 | 8.973530482 |
| LRCH3     | 84859  | 2277 | 9.155638621 | 12.4285248  | 10.76373839 | 13.33523471 |
| PVRL1     | 5818   | 5493 | 3.795264726 | 45.75919687 | 4.154151507 | 7.591543013 |
| ZBTB5     | 9925   | 4654 | 4.479456197 | 3.63886636  | 3.541085386 | 2.261775005 |
| CDC25C    | 995    | 2115 | 9.856921579 | 5.689345142 | 6.493385101 | 2.967042436 |
| HUS1      | 3364   | 3033 | 6.873520983 | 7.567348015 | 7.523492986 | 10.14480289 |
| CD101     | 9398   | 3547 | 5.87747086  | 14.3236121  | 11.37732997 | 63.63354446 |
| MTRF1     | 9617   | 2174 | 9.589415428 | 7.277424387 | 8.649652144 | 8.10087906  |
| ZNF426    | 79088  | 2320 | 8.985943595 | 6.339205687 | 7.467823462 | 5.846005956 |
| FAM200B   | 285550 | 4395 | 4.743433252 | 5.779960423 | 4.13435483  | 4.974361137 |
| SS18L2    | 51188  | 822  | 25.36178728 | 30.09054502 | 24.16151772 | 14.28330177 |
| METTL23   | 124512 | 1226 | 17.00439571 | 17.81207431 | 12.58057714 | 11.39281529 |
| SAMD10    | 140700 | 2196 | 9.493346603 | 3.450050675 | 7.312223071 | 1.198349371 |
| SLC36A1   | 206358 | 5821 | 3.581410263 | 7.081952702 | 4.428232415 | 7.024674509 |
| RAB40C    | 57799  | 2735 | 7.622445755 | 5.377315244 | 7.416211002 | 4.36683836  |
| DIS3L2    | 129563 | 3507 | 5.944507882 | 6.798716073 | 5.18120601  | 3.809610766 |
| LOC61303  | 613037 | 3455 | 6.033976596 | 5.740118362 | 6.237639843 | 3.105276335 |
| MRPL55    | 128308 | 882  | 23.63649562 | 12.3795936  | 14.85221679 | 5.278757197 |
| LRP11     | 84918  | 3618 | 5.762130774 | 3.756991092 | 5.139043394 | 0.839257309 |
| C11orf83  | 790955 | 1959 | 10.64185255 | 6.028653543 | 10.24607061 | 2.066655058 |
| BICD1     | 636    | 3589 | 5.808690204 | 2.297244173 | 3.767685909 | 0.846038714 |
| ARL13B    | 200894 | 3991 | 5.223600386 | 4.745872764 | 4.605806625 | 3.956264423 |
| RPGRIP1L  | 23322  | 6199 | 3.363024543 | 1.761381118 | 2.283606874 | 0.751066922 |
| HMGA2     | 8091   | 4150 | 5.023467263 | 1.771922553 | 7.942270548 | 1.707231374 |
| SLC41A3   | 54946  | 2349 | 8.87500602  | 10.81435762 | 8.0052549   | 5.170596755 |
| HKR1      | 284459 | 2952 | 7.062123693 | 5.585914184 | 7.873077151 | 4.525848562 |
| BLOC1S2   | 282991 | 2024 | 10.30009345 | 15.5234232  | 14.19699978 | 61.10871308 |
| HNRNPA1L  | 144983 | 2365 | 8.814963696 | 8.385669743 | 8.665802052 | 3.509337582 |
| EIF2AK3   | 9451   | 4665 | 4.425081023 | 5.158827428 | 6.340807415 | 3.992166215 |
| WDR27     | 253769 | 3599 | 5.735760759 | 3.529164499 | 3.933336763 | 1.124917271 |
| CAPN10    | 11132  | 2662 | 7.754696834 | 7.533787238 | 6.270284052 | 7.528346143 |
| LOC220594 | 220594 | 4859 | 4.248405633 | 5.411454373 | 4.5222505   | 3.291187523 |
| RNASE3    | 6037   | 716  | 28.83100974 | 11.82631567 | 18.00051738 | 1.979053129 |
| NTNG2     | 84628  | 3113 | 6.631224855 | 9.52031708  | 11.74181295 | 10.98955279 |
| ACBD5     | 91452  | 3993 | 5.169797889 | 8.594098034 | 6.137999579 | 10.18988266 |
| FAM179B   | 23116  | 6257 | 3.299185388 | 2.635387354 | 2.836490324 | 2.070552538 |
| SETD4     | 54093  | 3001 | 6.878708088 | 4.752179881 | 6.266025912 | 2.900513531 |
| PARP11    | 57097  | 4492 | 4.595503778 | 3.522066032 | 6.114652488 | 6.263938546 |

|           |        |       |             |             |             |             |
|-----------|--------|-------|-------------|-------------|-------------|-------------|
| TMEM223   | 79064  | 954   | 21.6383679  | 20.32121968 | 16.38896472 | 6.365687514 |
| GPR160    | 26996  | 2021  | 10.21425184 | 62.9576759  | 14.94988663 | 109.878507  |
| TSEN54    | 283989 | 1970  | 10.47868171 | 6.221217087 | 9.867105607 | 2.877161504 |
| HDHD1     | 8226   | 2224  | 9.281925797 | 6.713035017 | 6.270141299 | 5.461210332 |
| CAMTA1    | 23261  | 8444  | 2.44469481  | 1.820873431 | 1.776553536 | 1.24660124  |
| C1orf162  | 128346 | 946   | 21.82135621 | 36.03953569 | 21.88785054 | 34.45142382 |
| LYRM4     | 57128  | 1626  | 12.69557378 | 10.41530384 | 13.51390848 | 2.489899913 |
| RNPC3     | 55599  | 1901  | 10.85902313 | 11.1357733  | 11.11440091 | 9.796662489 |
| TMEM38B   | 55151  | 2076  | 9.94364305  | 14.59790228 | 8.650869324 | 7.995745069 |
| CSRP2BP   | 57325  | 3714  | 5.55815912  | 5.519818793 | 5.404429814 | 2.289179387 |
| DUSP10    | 11221  | 2678  | 7.708365561 | 1.497755163 | 5.049374431 | 2.19209747  |
| TLE4      | 7091   | 4749  | 4.346810481 | 13.32585438 | 6.851516793 | 34.8677216  |
| FAM113A   | 64773  | 1999  | 10.32666482 | 10.14395914 | 12.15495125 | 9.822711209 |
| WSB2      | 55884  | 2833  | 7.286623005 | 18.79880397 | 14.31933434 | 40.72871581 |
| ILKAP     | 80895  | 1480  | 13.94797498 | 8.43150699  | 16.417397   | 5.744602868 |
| FBXO31    | 79791  | 3636  | 5.677393557 | 3.493251658 | 4.300074901 | 2.393960701 |
| ADPRHL2   | 54936  | 1701  | 12.13580422 | 12.05209112 | 12.42120878 | 12.37660303 |
| C9orf40   | 55071  | 2335  | 8.753154948 | 5.630461841 | 8.867625959 | 2.600799096 |
| RAPGEF2   | 9693   | 6824  | 2.995107973 | 2.416415397 | 2.445998849 | 3.648703128 |
| BBS10     | 79738  | 3583  | 5.704330674 | 4.975332062 | 5.071306022 | 5.141229843 |
| TSPO      | 706    | 876   | 23.33175434 | 66.39193004 | 20.50137525 | 25.41914946 |
| JUN       | 3725   | 3338  | 6.123012823 | 4.272406178 | 9.557818743 | 22.80205287 |
| FN3KRP    | 79672  | 1844  | 11.08384859 | 8.821467455 | 12.26001598 | 3.40308826  |
| IL6ST     | 3572   | 9071  | 2.253182318 | 3.537416669 | 3.051295749 | 7.877564615 |
| ZBTB41    | 360023 | 8474  | 2.411920794 | 2.129979639 | 1.421197946 | 3.033805239 |
| HTATSF1P1 | 401233 | 4616  | 4.427776604 | 5.841151398 | 4.439909413 | 5.087033818 |
| LOC642852 | 642852 | 7181  | 2.846207604 | 2.513500552 | 3.001120409 | 1.663181021 |
| ZNF26     | 7574   | 3083  | 6.629457283 | 4.987173288 | 4.934318138 | 3.61128364  |
| TMEM185   | 84548  | 2732  | 7.481192095 | 5.464783996 | 6.88299552  | 6.149925192 |
| DUSP11    | 8446   | 1639  | 12.47017499 | 12.77990992 | 16.24275774 | 16.17948813 |
| CALCOCO1  | 57658  | 3046  | 6.709985819 | 5.852467098 | 8.115665489 | 13.15854066 |
| TSIX      | 9383   | 37027 | 0.551992244 | 0.698101154 | 0.524973615 | 0.617777879 |
| LYPLA2    | 11313  | 1648  | 12.4020733  | 15.8200389  | 19.87204976 | 27.51460273 |
| TAF12     | 6883   | 1466  | 13.94175771 | 18.54405698 | 19.31252253 | 17.2603055  |
| MRPS12    | 6183   | 1116  | 18.31417276 | 21.3647825  | 18.3643565  | 7.799678411 |
| MOAP1     | 64112  | 2435  | 8.393682466 | 5.124694187 | 7.375443415 | 4.904847193 |
| UAP1L1    | 91373  | 3401  | 6.009590357 | 4.717422317 | 7.703413822 | 8.332855282 |
| CECR1     | 51816  | 3947  | 5.178266229 | 6.661833494 | 4.175376586 | 21.48915469 |
| CASP10    | 843    | 5906  | 3.460653032 | 7.244137398 | 3.505910365 | 19.1940676  |
| METTL11A  | 28989  | 1007  | 20.29654102 | 9.736482749 | 21.401237   | 10.45312897 |
| HERC6     | 55008  | 3903  | 5.236642789 | 3.53974544  | 3.572839931 | 56.99956966 |
| C11orf68  | 83638  | 1571  | 13.00994068 | 11.06362152 | 13.04558998 | 16.36439567 |
| CAPRIN2   | 65981  | 4544  | 4.497935036 | 2.05963309  | 2.324876335 | 1.381006768 |
| MED26     | 9441   | 3184  | 6.419163569 | 5.738781454 | 6.436753094 | 3.94176806  |
| POLR3GL   | 84265  | 1191  | 16.98927845 | 23.38714156 | 20.04632916 | 21.58561343 |
| NTHL1     | 4913   | 1067  | 18.96366508 | 7.100572897 | 15.64338908 | 1.138306633 |
| CCNE2     | 9134   | 2739  | 7.387451857 | 7.159283044 | 9.796701239 | 3.769212125 |
| HCCS      | 3052   | 2365  | 8.555700058 | 7.537680668 | 10.80991802 | 8.388172757 |
| FCN1      | 2219   | 1313  | 15.41068594 | 8.825056821 | 29.44791419 | 37.1556405  |
| RAB3D     | 9545   | 4290  | 4.716603878 | 4.467042165 | 5.762311673 | 5.615159602 |
| COX17     | 10063  | 423   | 47.83506061 | 59.52740751 | 72.9257096  | 67.47628765 |
| EIF5A2    | 56648  | 5537  | 3.654367101 | 2.132947858 | 3.739553298 | 1.82796517  |
| GBGT1     | 26301  | 1949  | 10.38185256 | 5.716590168 | 17.0198602  | 10.17856776 |
| RABIF     | 5877   | 2452  | 8.252133212 | 8.088135784 | 9.13384368  | 6.109190807 |
| NFE2      | 4778   | 1678  | 12.05854031 | 14.60762534 | 30.97500077 | 15.8034452  |
| SLC9A8    | 23315  | 6255  | 3.234888991 | 5.521833115 | 3.310296821 | 7.572878326 |
| EMILIN1   | 11117  | 3959  | 5.110944844 | 3.996241631 | 5.016612167 | 1.278282792 |
| HINT3     | 135114 | 3396  | 5.958254015 | 5.971076063 | 5.039477524 | 8.941204194 |
| SERPINF1  | 5176   | 1552  | 13.03751974 | 12.77842071 | 16.06417644 | 17.86904267 |
| BOD1      | 91272  | 1934  | 10.46237365 | 7.950080273 | 11.25249763 | 5.54743006  |
| TMUB2     | 79089  | 2443  | 8.28253403  | 10.21582509 | 10.20532208 | 14.00347026 |
| CPEB4     | 80315  | 7769  | 2.604483284 | 5.736457324 | 3.970597909 | 16.64976746 |

|          |        |       |             |             |             |             |
|----------|--------|-------|-------------|-------------|-------------|-------------|
| COL2A1   | 1280   | 5087  | 3.977635274 | 1.182717218 | 3.07353496  | 0.676487256 |
| CCDC51   | 79714  | 1506  | 13.43574411 | 10.65335545 | 13.8892373  | 4.973351879 |
| GEMIN8   | 54960  | 3259  | 6.20872373  | 6.153710226 | 5.899635865 | 2.484551862 |
| TCEANC2  | 127428 | 4097  | 4.938791954 | 4.677473978 | 5.002348512 | 4.990313683 |
| EPHX1    | 2052   | 1847  | 10.95518713 | 2.774852057 | 10.1810199  | 4.383949387 |
| CLTB     | 1212   | 1184  | 17.08972182 | 18.8203281  | 16.23894703 | 14.53247749 |
| CTC1     | 80169  | 7089  | 2.854313815 | 3.583428701 | 2.950654729 | 4.340412917 |
| HELQ     | 113510 | 3596  | 5.626871701 | 4.52357786  | 5.699283051 | 5.516693151 |
| C9orf41  | 138199 | 2219  | 9.118625794 | 5.723958103 | 6.379485809 | 2.554307419 |
| CLCN5    | 1184   | 10108 | 2.001803585 | 1.829749984 | 1.504996322 | 1.161542744 |
| TECPR2   | 9895   | 8703  | 2.324971922 | 1.766684505 | 2.160673763 | 2.953977433 |
| C11orf46 | 120534 | 1770  | 11.43176872 | 10.19742795 | 9.430223812 | 5.489596284 |
| TNFAIP1  | 7126   | 3822  | 5.29414721  | 4.839119004 | 5.859807615 | 4.766770713 |
| ACP2     | 53     | 2218  | 9.122736987 | 13.8642518  | 9.906950037 | 38.14935289 |
| MLLT3    | 4300   | 3439  | 5.883754183 | 3.498972078 | 5.898033466 | 2.589959282 |
| LMAN2L   | 81562  | 2458  | 8.14883827  | 3.807556045 | 7.306429909 | 3.376559553 |
| LOC65227 | 652276 | 2714  | 7.380193245 | 7.225230751 | 6.072296016 | 7.384103697 |
| MEGF9    | 1955   | 6227  | 3.216612248 | 7.479047874 | 2.850155766 | 15.70148399 |
| HAUS8    | 93323  | 1468  | 13.64430822 | 10.9291235  | 11.22630203 | 10.06628542 |
| RP9      | 6100   | 1184  | 16.91709837 | 8.657350927 | 15.34669719 | 4.274258086 |
| SLC2A13  | 114134 | 7018  | 2.854067322 | 2.444872717 | 3.974008051 | 2.336383286 |
| ARL16    | 339231 | 1207  | 16.59473444 | 16.2462935  | 16.62970367 | 10.565881   |
| WWP1     | 11059  | 4120  | 4.861612735 | 4.272762644 | 4.871857361 | 3.390192122 |
| DDAH2    | 23564  | 1351  | 14.82593965 | 5.442989339 | 10.79100558 | 7.491815801 |
| ABCD4    | 5826   | 3157  | 6.344581713 | 7.693621361 | 8.365725426 | 5.899098952 |
| DNAAF2   | 55172  | 2976  | 6.730458491 | 3.668952135 | 6.815637463 | 1.428429476 |
| CTU2     | 348180 | 1740  | 11.51140487 | 8.964533294 | 9.835669925 | 2.675783821 |
| GET4     | 51608  | 2106  | 9.510847326 | 10.8982747  | 15.75104821 | 9.227526516 |
| SEPT7P2  | 641977 | 2265  | 8.843198441 | 6.296376081 | 6.716336785 | 3.932392923 |
| FAM207A  | 85395  | 964   | 20.77784696 | 23.34657797 | 26.73935777 | 17.21905266 |
| CHFR     | 55743  | 3291  | 6.086248699 | 13.00026602 | 6.612680164 | 11.80988808 |
| SVIL     | 6840   | 8306  | 2.386883975 | 5.392411466 | 2.798136738 | 2.583368586 |
| MINPP1   | 9562   | 2906  | 6.822249931 | 4.677492694 | 8.724766471 | 6.826575557 |
| GTPBP3   | 84705  | 2708  | 7.321070273 | 4.11434056  | 6.943996958 | 1.943556291 |
| NDNL2    | 56160  | 1748  | 11.34179537 | 12.3654293  | 10.27414457 | 11.81221054 |
| SPATA2   | 9825   | 4156  | 4.770322016 | 4.825539371 | 4.270433098 | 3.263410447 |
| AGPAT4   | 56895  | 7889  | 2.513050868 | 1.864235923 | 2.276486844 | 2.976517696 |
| R3HCC1   | 203069 | 1644  | 12.0592812  | 14.77418652 | 12.72335242 | 8.988629559 |
| C2orf3   | 6936   | 4455  | 4.45015899  | 2.901076479 | 4.505511185 | 1.045087283 |
| MED18    | 54797  | 1869  | 10.60752183 | 14.66475132 | 10.40031998 | 13.43027234 |
| ENGASE   | 64772  | 4490  | 4.415469555 | 3.424377561 | 3.952766137 | 2.209134585 |
| TMEM147  | 10430  | 869   | 22.81410621 | 27.1809719  | 23.58414482 | 13.27784256 |
| NUDT22   | 84304  | 1149  | 17.2545329  | 30.44798216 | 18.38857801 | 26.9552794  |
| WDR81    | 124997 | 6869  | 2.88622191  | 5.969022273 | 3.106676503 | 11.58167756 |
| UBXN2A   | 165324 | 1909  | 10.38525841 | 4.669097637 | 11.62121527 | 8.165019616 |
| STAG3L4  | 64940  | 2135  | 9.285928946 | 8.349702473 | 7.52114373  | 5.878496254 |
| C6orf136 | 221545 | 1984  | 9.992670514 | 7.525095704 | 10.86242221 | 6.121840614 |
| TMEM168  | 64418  | 3951  | 5.01783303  | 5.188713489 | 4.278101976 | 2.459272443 |
| ZBTB6    | 10773  | 4128  | 4.802678852 | 4.912251529 | 4.964782425 | 7.257623963 |
| ZBTB17   | 7709   | 2767  | 7.164965052 | 5.556723978 | 8.781260411 | 6.730558508 |
| LUC7L    | 55692  | 2082  | 9.522314265 | 9.953621365 | 11.67038788 | 6.028140972 |
| FAM13A   | 10144  | 5858  | 3.384339075 | 2.89096689  | 2.596876548 | 6.116406409 |
| TTPAL    | 79183  | 6215  | 3.189936975 | 4.123211383 | 3.433589847 | 5.081078459 |
| CCNE1    | 898    | 1958  | 10.12536175 | 6.031732529 | 11.54620504 | 2.377867134 |
| TMLHE    | 55217  | 3961  | 5.005164933 | 7.369624262 | 5.547491841 | 6.592608766 |
| NUDT1    | 4521   | 816   | 24.04543153 | 15.29243915 | 20.45526489 | 7.690312196 |
| C17orf58 | 284018 | 1625  | 12.07450593 | 10.01032984 | 11.83194664 | 3.612576631 |
| ELK3     | 2004   | 2180  | 9.000491804 | 30.05174739 | 6.978212302 | 23.21431915 |
| ZNF839   | 55778  | 3337  | 5.8798538   | 5.876318926 | 5.318525608 | 4.367659015 |
| EIF2C3   | 192669 | 3667  | 5.350715062 | 9.115053916 | 5.588934238 | 11.8134106  |
| FBXL17   | 64839  | 5212  | 3.764595574 | 5.557990985 | 3.283588962 | 4.660679884 |
| ADD2     | 119    | 4119  | 4.763552351 | 2.867232894 | 3.539365995 | 0.982902952 |

|           |        |      |             |             |             |             |
|-----------|--------|------|-------------|-------------|-------------|-------------|
| RETSAT    | 54884  | 3328 | 5.895754847 | 4.686985556 | 5.142447617 | 5.717642163 |
| ZNF862    | 643641 | 6913 | 2.838286147 | 4.383805168 | 2.659015513 | 3.455316914 |
| GBA       | 2629   | 2583 | 7.596233888 | 14.92452747 | 10.06117911 | 25.47014342 |
| PCYT1A    | 5130   | 1677 | 11.70010264 | 14.61633591 | 15.49673563 | 20.52051682 |
| MRPL33    | 9553   | 528  | 37.16112146 | 28.27611719 | 38.41541116 | 23.77005588 |
| MAML2     | 84441  | 5428 | 3.614788528 | 1.149468529 | 4.787771858 | 10.92698173 |
| PRICKLE3  | 4007   | 1990 | 9.859835242 | 15.45271884 | 7.644473778 | 13.9360574  |
| WDR67     | 93594  | 3520 | 5.574168219 | 2.658799079 | 5.522215354 | 1.380196793 |
| NOL12     | 79159  | 2840 | 6.908828216 | 7.767759081 | 6.54685176  | 4.347943887 |
| RFNG      | 5986   | 1828 | 10.73362808 | 8.776779705 | 8.784267978 | 7.419438631 |
| RNF139    | 11236  | 3312 | 5.924236755 | 8.342769598 | 6.443164522 | 8.373416131 |
| SCAND1    | 51282  | 1388 | 14.13621912 | 19.10453133 | 14.4611328  | 22.45968652 |
| TTC23     | 64927  | 3808 | 5.152592472 | 3.745087139 | 2.885191069 | 2.179512443 |
| TBX1      | 6899   | 2082 | 9.424146077 | 6.956832137 | 8.422975597 | 6.319825212 |
| GGCX      | 2677   | 3247 | 6.042830962 | 5.764689103 | 4.489882517 | 6.171991818 |
| EHHADH    | 1962   | 3993 | 4.913867301 | 4.185437354 | 5.02681     | 3.49801942  |
| PQLC1     | 80148  | 2565 | 7.649540792 | 7.210570305 | 8.731456025 | 7.891963468 |
| ASPSCR1   | 79058  | 1858 | 10.56031869 | 7.43575159  | 8.187568793 | 4.902744259 |
| HGSNAT    | 138050 | 5228 | 3.753074241 | 6.64917728  | 4.445547772 | 3.252491295 |
| RTTN      | 25914  | 7109 | 2.760032653 | 2.632992758 | 2.318217947 | 1.423750619 |
| MAP3K6    | 9064   | 4333 | 4.528288053 | 1.234245196 | 3.998465366 | 0.794205094 |
| TTC8      | 123016 | 2248 | 8.728234934 | 9.218611958 | 5.075345691 | 3.42184021  |
| INTS9     | 55756  | 2764 | 7.098795996 | 8.948780031 | 9.249441434 | 5.053397809 |
| FBXL15    | 79176  | 2383 | 8.233769254 | 8.322328553 | 6.738414546 | 6.371030097 |
| FAM203A   | 51236  | 2441 | 8.03812869  | 9.311320706 | 9.694343823 | 2.07321654  |
| ACOX3     | 8310   | 2890 | 6.789298316 | 4.394969907 | 6.214257687 | 3.362140284 |
| ARL5B     | 221079 | 3589 | 5.467002544 | 5.836241952 | 6.299099879 | 10.09606199 |
| RBFA      | 79863  | 5679 | 3.455022386 | 2.785899034 | 3.534434289 | 0.677258038 |
| C11orf49  | 79096  | 2008 | 9.669664325 | 7.213209416 | 7.891612103 | 4.334881029 |
| FERMT1    | 55612  | 5167 | 3.757825811 | 2.113180095 | 2.535253572 | 0.274240767 |
| ECI1      | 1632   | 1069 | 18.16341063 | 17.30132164 | 13.44000353 | 9.468141392 |
| MUL1      | 79594  | 2474 | 7.848296671 | 7.746002784 | 7.856991934 | 8.345894916 |
| RAD52     | 5893   | 2673 | 7.264005224 | 7.252691198 | 7.588229364 | 5.679822193 |
| ABCC4     | 10257  | 5843 | 3.323067938 | 1.983107925 | 3.869154452 | 1.108629747 |
| WIBG      | 84305  | 1244 | 15.60826846 | 26.6897669  | 23.43834169 | 27.98855661 |
| PRF1      | 5551   | 2555 | 7.5994857   | 7.674863506 | 8.352156907 | 34.93977635 |
| ITGAL     | 3683   | 5226 | 3.715401065 | 7.035475121 | 5.336698909 | 25.64253871 |
| WDR47     | 22911  | 4394 | 4.418908959 | 3.347054436 | 4.519974412 | 4.100174967 |
| LMBRD1    | 55788  | 2308 | 8.412775548 | 17.66827613 | 9.886808591 | 24.11955689 |
| DNMBP     | 23268  | 6419 | 3.024877078 | 2.325874728 | 3.423214703 | 4.320416611 |
| RMI2      | 116028 | 1462 | 13.28090695 | 15.54646638 | 13.2956211  | 7.615312902 |
| MXD3      | 83463  | 2662 | 7.294021775 | 5.357359813 | 5.159094474 | 1.74900971  |
| BLCAP     | 10904  | 2216 | 8.762042403 | 10.96063296 | 9.915891327 | 13.15422214 |
| C14orf167 | 55449  | 3038 | 6.391272536 | 4.327560369 | 5.146501758 | 1.865703806 |
| RINL      | 126432 | 3062 | 6.34117765  | 12.2259605  | 7.038225231 | 13.35422283 |
| WDR92     | 116143 | 2244 | 8.652712105 | 5.262982305 | 8.756454014 | 2.616059281 |
| AVEN      | 57099  | 1551 | 12.51881751 | 9.19490124  | 13.21381164 | 4.437512147 |
| MAST3     | 23031  | 5893 | 3.294872894 | 4.159442614 | 4.55339635  | 6.835795644 |
| DBNDD1    | 79007  | 2150 | 9.031016728 | 2.072862184 | 8.25484649  | 1.318141433 |
| ALKBH3    | 221120 | 1585 | 12.25027506 | 12.37178313 | 12.26384735 | 9.45093745  |
| DUS2L     | 54920  | 1999 | 9.713199582 | 11.14720784 | 7.927142122 | 10.1265064  |
| LRRC14    | 9684   | 5369 | 3.616443651 | 2.490214395 | 2.361163286 | 1.206504678 |
| C8orf40   | 114926 | 1487 | 13.05762338 | 11.68860081 | 10.9407711  | 6.398222299 |
| FMNL2     | 114793 | 5575 | 3.482813626 | 1.239069637 | 2.690801445 | 4.974485063 |
| PIGC      | 5279   | 1537 | 12.49986974 | 15.07781341 | 11.82204911 | 12.2484608  |
| OSBPL11   | 114885 | 4651 | 4.130789034 | 2.395535205 | 4.406497926 | 10.22807628 |
| LOC81691  | 81691  | 2903 | 6.61808467  | 7.98298285  | 5.458614227 | 2.231389464 |
| SELO      | 83642  | 2327 | 8.256252598 | 7.852290567 | 7.990141384 | 4.001601932 |
| METTLL22  | 79091  | 1570 | 12.23713363 | 9.083625365 | 7.940000586 | 6.446779075 |
| TXNL4B    | 54957  | 2563 | 7.496020209 | 6.346775648 | 7.584158426 | 4.975816764 |
| LSMD1     | 84316  | 1023 | 18.78035171 | 13.5050112  | 17.34889536 | 7.519351703 |
| UCK1      | 83549  | 2191 | 8.768735644 | 10.06866079 | 10.89693201 | 10.44019238 |

|           |        |       |             |             |             |             |
|-----------|--------|-------|-------------|-------------|-------------|-------------|
| ZNF544    | 27300  | 3512  | 5.470472607 | 3.235896048 | 3.188522879 | 2.881959894 |
| ORAI3     | 93129  | 2205  | 8.713061132 | 21.22216045 | 9.486254592 | 24.97081665 |
| STARD8    | 9754   | 4962  | 3.871886295 | 1.975944806 | 3.321284036 | 2.406953429 |
| C2orf49   | 79074  | 902   | 21.29966718 | 14.82257326 | 22.48706995 | 16.60724596 |
| ALG2      | 85365  | 2993  | 6.41907778  | 7.445128124 | 6.423960335 | 5.816532648 |
| SNRNP25   | 79622  | 1103  | 17.41822284 | 28.08136281 | 21.64567365 | 9.543337147 |
| ZNF526    | 116115 | 3954  | 4.858952907 | 3.381376096 | 4.809213081 | 3.481325918 |
| SNX11     | 29916  | 2402  | 7.998459532 | 10.29743048 | 10.02766977 | 20.81595718 |
| RASA4     | 10156  | 5606  | 3.427095932 | 3.458159753 | 4.71113007  | 4.008134818 |
| C14orf101 | 54916  | 4278  | 4.490953669 | 6.51100645  | 4.988256404 | 6.198733298 |
| HCFC2     | 29915  | 5743  | 3.34534212  | 2.987657448 | 3.274306767 | 2.643594763 |
| PLAGL1    | 5325   | 3425  | 5.609430597 | 6.506063788 | 7.40267777  | 11.99797348 |
| TBC1D22A  | 25771  | 3793  | 5.065198997 | 5.228607683 | 4.957644018 | 4.376263317 |
| BMS1P4    | 729096 | 1960  | 9.802193774 | 7.503549588 | 10.24084303 | 6.300081959 |
| HERC2P9   | 440248 | 2962  | 6.486259215 | 7.974430987 | 9.415796252 | 5.672382048 |
| TBPL1     | 9519   | 1340  | 14.33753716 | 12.30568558 | 14.50611794 | 17.67475893 |
| LGALS3    | 3958   | 1973  | 9.737607601 | 2.371761976 | 24.09481566 | 4.514379103 |
| METTL2A   | 339175 | 2519  | 7.62695506  | 4.865342462 | 8.639273688 | 3.535875335 |
| ZNF260    | 339324 | 5474  | 3.509736901 | 3.175182574 | 3.12642778  | 2.736524636 |
| ZNF791    | 163049 | 2495  | 7.70032056  | 7.055624086 | 6.605295145 | 9.654923724 |
| ANTXR1    | 84168  | 5909  | 3.251362294 | 0.905057444 | 1.28723158  | 1.061989296 |
| SAC3D1    | 29901  | 1584  | 12.12897714 | 7.877923198 | 11.07110808 | 2.555919987 |
| C12orf57  | 113246 | 574   | 33.1148321  | 10.86988706 | 19.87696361 | 12.69588688 |
| SLC10A3   | 8273   | 2161  | 8.795887843 | 8.352358845 | 8.310599128 | 6.838180007 |
| PDP1      | 54704  | 4373  | 4.346653014 | 1.324868466 | 3.430418033 | 2.684855717 |
| MRPL53    | 116540 | 673   | 28.24355665 | 33.44145789 | 27.94107543 | 30.98094039 |
| KIAA0753  | 9851   | 4701  | 4.043376649 | 4.692711293 | 3.775349916 | 4.047716043 |
| POLR2I    | 5438   | 885   | 21.47786851 | 13.84835894 | 19.57666715 | 5.718329462 |
| TATDN1    | 83940  | 1158  | 16.41443318 | 9.044159053 | 16.42109544 | 4.719843955 |
| ZYG11A    | 440590 | 4286  | 4.434884188 | 3.743339548 | 4.880352631 | 1.511368086 |
| DNAH14    | 127602 | 13788 | 1.378583814 | 1.987845969 | 1.164609941 | 1.05706978  |
| C6orf130  | 221443 | 1202  | 15.81357207 | 14.83079433 | 13.35910305 | 11.7887025  |
| MVD       | 4597   | 1812  | 10.49001856 | 25.94795612 | 7.462596428 | 11.28328651 |
| ALKBH2    | 121642 | 1206  | 15.76112241 | 7.206032094 | 16.29310349 | 3.189177775 |
| SNX29     | 92017  | 7011  | 2.711155845 | 1.557381479 | 1.988987912 | 1.819001336 |
| ZNF593    | 51042  | 653   | 29.10859667 | 19.10969425 | 25.88480997 | 11.15993731 |
| USP31     | 57478  | 10698 | 1.776772633 | 1.124786406 | 1.6589942   | 0.397364566 |
| HAL       | 3034   | 3139  | 6.05540415  | 1.135814895 | 5.182837408 | 4.51418299  |
| NDUFA2    | 4695   | 846   | 22.46798301 | 31.60747301 | 26.97252273 | 24.88487204 |
| SH3BP5    | 9467   | 2810  | 6.691646783 | 3.885694503 | 11.27854598 | 6.699602938 |
| STK36     | 27148  | 4935  | 3.810238594 | 5.237809814 | 3.596336364 | 3.855787866 |
| NEDD4     | 4734   | 7019  | 2.678946782 | 3.714407197 | 1.113767797 | 2.076489262 |
| TFPT      | 29844  | 1223  | 15.37492025 | 14.21173296 | 14.16627182 | 18.53804796 |
| C6orf72   | 116254 | 1138  | 16.5233106  | 13.31513406 | 12.99642645 | 8.360418769 |
| PION      | 54103  | 3265  | 5.759120202 | 2.183965057 | 2.717905047 | 2.665985025 |
| TOMM40L   | 84134  | 2713  | 6.930898437 | 9.034867424 | 6.152412882 | 7.312211047 |
| GTF2H4    | 2968   | 1736  | 10.83152503 | 9.370268425 | 11.80565775 | 3.731407612 |
| ABCC10    | 89845  | 5118  | 3.673999113 | 6.182540296 | 3.632875928 | 5.735088927 |
| LNX2      | 222484 | 4804  | 3.914139771 | 4.499327731 | 4.705967832 | 3.876655993 |
| LOC100128 | 1E+08  | 1753  | 10.72648458 | 4.703256894 | 10.24484011 | 1.732135165 |
| ZFP90     | 146198 | 4384  | 4.289125789 | 2.338116674 | 3.662783272 | 2.124025478 |
| TBC1D17   | 79735  | 2390  | 7.867584711 | 7.9250118   | 7.337504265 | 11.85775766 |
| APOO      | 79135  | 1134  | 16.58159388 | 14.73761142 | 21.61290328 | 4.99824353  |
| TACO1     | 51204  | 1479  | 12.71367644 | 11.29983188 | 13.28565437 | 10.26515532 |
| MPG       | 4350   | 1305  | 14.4088333  | 15.88003041 | 19.10467574 | 13.80549334 |
| POLG2     | 11232  | 1607  | 11.70101273 | 7.071852472 | 10.51822085 | 3.14917335  |
| SLC35A3   | 23443  | 2149  | 8.749896445 | 7.984233004 | 7.865416896 | 6.311183722 |
| GAB3      | 139716 | 4756  | 3.953643284 | 6.981091259 | 6.086209484 | 11.91759496 |
| ECE2      | 9718   | 3498  | 5.3170787   | 4.586607576 | 5.436143088 | 0.810178411 |
| GTF2IRD1  | 9569   | 3522  | 5.280846477 | 2.910364423 | 4.559239598 | 1.954168467 |
| COQ4      | 51117  | 1597  | 11.64630012 | 11.16256404 | 12.83320091 | 3.42240407  |
| SPPL2B    | 56928  | 3832  | 4.853638124 | 5.233544266 | 3.528764282 | 3.063902414 |

|           |        |      |             |             |             |             |
|-----------|--------|------|-------------|-------------|-------------|-------------|
| DUSP4     | 1846   | 6440 | 2.888065418 | 3.287128113 | 4.789996143 | 2.891840899 |
| AFG3L1P   | 172    | 3186 | 5.837771906 | 7.203944296 | 8.355894517 | 4.765274552 |
| SIPA1L1   | 26037  | 6028 | 3.085458078 | 2.735504093 | 2.698892937 | 6.145401778 |
| PLXNC1    | 10154  | 7346 | 2.531873304 | 7.795807239 | 3.048759148 | 27.80434559 |
| AP1S2     | 8905   | 2283 | 8.146798639 | 23.52285459 | 10.92054395 | 43.7132849  |
| KTI12     | 112970 | 1712 | 10.8639844  | 8.980990214 | 8.515565732 | 4.611405172 |
| DTWD2     | 285605 | 4974 | 3.739272475 | 1.747180278 | 4.205305865 | 2.767423136 |
| LOC100131 | 1E+08  | 2712 | 6.858090447 | 5.669415652 | 5.765144668 | 5.598143334 |
| UFSP2     | 55325  | 2379 | 7.818050144 | 6.743990459 | 6.749744373 | 4.084315015 |
| AKT3      | 10000  | 7091 | 2.622922196 | 2.702525862 | 1.460013158 | 3.197296947 |
| MXRA7     | 439921 | 2507 | 7.418883643 | 2.310989152 | 7.079345813 | 1.93789099  |
| CCDC130   | 81576  | 1679 | 11.07751119 | 14.59892515 | 9.563812903 | 11.57425303 |
| KIAA0247  | 9766   | 5393 | 3.448756034 | 10.61895049 | 5.288975113 | 27.51350947 |
| COMMD8    | 54951  | 1438 | 12.93403428 | 18.2852968  | 15.57453735 | 15.06250927 |
| LOC100131 | 1E+08  | 2332 | 7.97561805  | 9.459878126 | 8.426021787 | 10.93740855 |
| AZI1      | 22994  | 3630 | 5.123730383 | 4.358435432 | 4.074361789 | 2.844041876 |
| E2F5      | 1875   | 1743 | 10.67076379 | 1.789820761 | 9.212645934 | 3.368007473 |
| ISCA2     | 122961 | 1061 | 17.52982214 | 13.86141111 | 14.13875406 | 13.73692567 |
| GPN2      | 54707  | 1510 | 12.31731211 | 15.3474167  | 15.53152882 | 14.34429691 |
| ZNF786    | 136051 | 3268 | 5.628750038 | 5.386714227 | 5.883388398 | 3.282965036 |
| SMYD3     | 64754  | 1641 | 11.20947905 | 6.246376294 | 10.04278573 | 3.82406749  |
| SEMA4B    | 10509  | 3814 | 4.822956246 | 10.63333734 | 5.927495927 | 34.60503897 |
| ITFG2     | 55846  | 2379 | 7.732137505 | 10.02231915 | 8.170743188 | 4.850124081 |
| ZNF785    | 146540 | 3265 | 5.633921937 | 6.893139712 | 4.33570567  | 4.587974229 |
| ATP7B     | 540    | 6644 | 2.768626599 | 0.335389351 | 1.685444364 | 0.213275443 |
| CASP7     | 840    | 2712 | 6.782726816 | 17.91206684 | 9.193068525 | 52.62254734 |
| BMF       | 90427  | 4700 | 3.913777686 | 0.9956354   | 10.78900909 | 6.718915451 |
| C16orf59  | 80178  | 1650 | 11.14833644 | 6.077255038 | 7.811133602 | 2.699051506 |
| AKR7A2    | 8574   | 1377 | 13.35857307 | 14.56422776 | 10.28037691 | 6.468315156 |
| ZNF343    | 79175  | 3632 | 5.064635221 | 2.822220126 | 4.944714955 | 2.117923126 |
| TYROBP    | 7305   | 608  | 30.25453145 | 114.3483514 | 61.16137829 | 460.4590748 |
| C1orf106  | 55765  | 4175 | 4.405929371 | 16.91927211 | 3.137641965 | 6.351660131 |
| PIDD      | 55367  | 3022 | 6.086947427 | 6.341366938 | 6.432229664 | 1.808596724 |
| BCL10     | 8915   | 3118 | 5.899536602 | 9.933849641 | 8.538126983 | 13.69868187 |
| DTNBP1    | 84062  | 2102 | 8.751072847 | 10.17694469 | 9.046445539 | 13.38611415 |
| PPP1R3B   | 79660  | 5722 | 3.214742245 | 6.581391772 | 2.953998761 | 16.73345896 |
| SPRY4     | 81848  | 4992 | 3.68484678  | 0.892759154 | 3.470623083 | 1.581475492 |
| AGK       | 55750  | 2925 | 6.288805171 | 4.570926866 | 3.972875855 | 2.491432159 |
| HOMEZ     | 57594  | 3741 | 4.862434899 | 6.909540612 | 5.139511704 | 9.252963263 |
| HEMK1     | 51409  | 5862 | 3.103099447 | 3.079059615 | 2.919492608 | 1.208633607 |
| FAM72B    | 653820 | 2374 | 7.662328962 | 2.534322868 | 5.07297026  | 1.108498407 |
| PLEKHM1   | 9842   | 5313 | 3.423747215 | 6.375036341 | 3.61884308  | 10.97299314 |
| CCDC136   | 64753  | 4221 | 4.309492764 | 1.742117649 | 5.75639601  | 4.124350205 |
| C2orf47   | 79568  | 1525 | 11.92811079 | 9.790026149 | 10.39105384 | 11.54840071 |
| TMEM203   | 94107  | 1576 | 11.54211228 | 12.72521677 | 12.33388201 | 7.96357202  |
| NBPF15    | 284565 | 4802 | 3.788081832 | 4.454797529 | 3.607944696 | 2.740082485 |
| C11orf75  | 56935  | 979  | 18.58056073 | 27.31350579 | 21.58169166 | 30.60211616 |
| SLC25A24  | 29957  | 3495 | 5.204683535 | 4.781817269 | 11.90932704 | 6.544910304 |
| TRAPPC2   | 6399   | 2869 | 6.34031682  | 8.077587735 | 8.027200763 | 6.773499771 |
| PGAP2     | 27315  | 2229 | 8.160775664 | 7.697674619 | 9.478903605 | 4.994879974 |
| RNF185    | 91445  | 3385 | 5.373816531 | 6.517115447 | 6.179377068 | 10.34569964 |
| ATP8B3    | 148229 | 5104 | 3.563943761 | 2.532189599 | 3.891216216 | 0.515590756 |
| IL13RA1   | 3597   | 4006 | 4.540781067 | 5.618098143 | 7.753085352 | 14.75517423 |
| UBE2D4    | 51619  | 3998 | 4.549867173 | 5.462131842 | 5.971780399 | 4.101235092 |
| SCML2     | 10389  | 4212 | 4.318701082 | 3.70329723  | 5.618208279 | 2.114641493 |
| TMEM188   | 255919 | 2129 | 8.544090632 | 4.39594775  | 6.252202896 | 10.0786564  |
| SNHG4     | 724102 | 1100 | 16.53669905 | 7.090130878 | 11.52462335 | 2.944419825 |
| C16orf61  | 56942  | 740  | 24.58157967 | 18.97089073 | 21.69951603 | 14.22473091 |
| C4orf10   | 317648 | 3860 | 4.712530818 | 3.752363862 | 3.448430043 | 2.674578241 |
| FAM108B1  | 51104  | 3153 | 5.704403041 | 4.381740074 | 6.433027939 | 5.264562881 |
| ZNF41     | 7592   | 4375 | 4.11108178  | 4.634919843 | 4.925953293 | 4.071711986 |
| PEX11B    | 8799   | 1836 | 9.796286921 | 9.709485174 | 10.81741153 | 9.702472734 |



|          |        |       |             |             |             |             |
|----------|--------|-------|-------------|-------------|-------------|-------------|
| CRELD2   | 79174  | 1575  | 11.41967161 | 6.932572414 | 10.06117911 | 5.526629274 |
| GEMIN6   | 79833  | 705   | 25.51203232 | 12.01083974 | 21.57801818 | 9.475393585 |
| NAPEPLD  | 222236 | 5363  | 3.353716723 | 2.451450382 | 2.994152874 | 1.207854487 |
| TXNRD2   | 10587  | 1964  | 9.157832377 | 8.963229172 | 6.669885542 | 5.359623663 |
| CD84     | 8832   | 8296  | 2.168030712 | 6.84936531  | 6.188789418 | 16.17771651 |
| PLEKHA5  | 54477  | 6591  | 2.728870094 | 1.758048795 | 3.077429387 | 1.289942686 |
| RCE1     | 9986   | 1489  | 12.07923626 | 9.7274174   | 20.85887167 | 11.2838117  |
| MIPEP    | 4285   | 2446  | 7.353222726 | 4.828345172 | 8.033312676 | 2.317255995 |
| AXIN1    | 8312   | 3675  | 4.894144976 | 6.972995577 | 6.956586701 | 4.076118601 |
| SIL1     | 64374  | 1996  | 9.011013421 | 14.51315081 | 8.997597553 | 21.50046039 |
| C17orf79 | 55352  | 957   | 18.79413039 | 10.94371597 | 21.63626605 | 6.134207968 |
| CENPP    | 401541 | 3428  | 5.246786111 | 5.330303427 | 4.560989598 | 2.7754249   |
| NAAA     | 27163  | 1880  | 9.567012121 | 1.303808262 | 8.653684375 | 2.261173469 |
| ZNF589   | 51385  | 3399  | 5.291551276 | 3.999056714 | 4.475581882 | 3.335103361 |
| OGG1     | 4968   | 2258  | 7.965448533 | 6.41458127  | 9.170020644 | 9.144262188 |
| ZNF557   | 79230  | 6002  | 2.99666491  | 3.452755695 | 3.977870382 | 5.328850441 |
| NBPF10   | 1E+08  | 10697 | 1.681404393 | 3.062204792 | 1.22461019  | 2.08162802  |
| TMEM199  | 147007 | 1466  | 12.26874679 | 12.0080369  | 14.41233024 | 15.74139862 |
| FBXL4    | 26235  | 2777  | 6.476767298 | 5.215745232 | 5.401951047 | 2.259738837 |
| C16orf54 | 283897 | 2686  | 6.696196124 | 27.791865   | 10.77662409 | 25.39781341 |
| FAM40B   | 57464  | 5115  | 3.516321171 | 1.786146642 | 3.139323922 | 1.068539453 |
| MIS12    | 79003  | 2509  | 7.168586205 | 7.460321052 | 8.673706824 | 5.809038714 |
| DEXI     | 28955  | 1580  | 11.38353341 | 7.051667239 | 8.825819145 | 3.459227405 |
| RUSC1    | 23623  | 3503  | 5.134451267 | 5.025344589 | 5.729960699 | 3.004938873 |
| TMEM184  | 25829  | 3730  | 4.8219793   | 4.898734624 | 8.326772097 | 9.280250822 |
| C6orf203 | 51250  | 1525  | 11.79408707 | 8.182708423 | 10.39105384 | 5.442349758 |
| SGSM3    | 27352  | 3004  | 5.919306465 | 4.524898059 | 6.470771653 | 4.784437174 |
| ZNF75A   | 7627   | 2141  | 8.305276329 | 7.909987875 | 8.684287249 | 6.618412147 |
| DHODH    | 1723   | 2080  | 8.548844529 | 5.892210414 | 9.040549885 | 1.5571451   |
| PCBP3    | 54039  | 2000  | 8.89079831  | 1.89407782  | 6.866754744 | 1.012144315 |
| UNC119   | 9094   | 1665  | 10.67963761 | 21.41335109 | 13.70495749 | 29.0573563  |
| ILVBL    | 10994  | 2328  | 7.638142878 | 6.221702967 | 6.443822189 | 3.739021094 |
| SGMS1    | 259230 | 3767  | 4.720360133 | 1.952078205 | 5.160126903 | 3.063032967 |
| GBP2     | 2634   | 2595  | 6.852253033 | 14.25442222 | 6.513595726 | 127.1518484 |
| PMF1     | 11243  | 1128  | 15.76382679 | 9.67978861  | 15.92128078 | 6.81941205  |
| PRPF18   | 8559   | 1711  | 10.39251702 | 9.507180588 | 9.755403944 | 8.518339061 |
| TRAIP    | 10293  | 2042  | 8.707931743 | 6.874857561 | 6.208171245 | 3.965305837 |
| SNTB2    | 6645   | 9771  | 1.819833857 | 0.661359928 | 2.205613106 | 0.82869251  |
| NSUN6    | 221078 | 2426  | 7.32959465  | 5.143705831 | 6.357703042 | 3.50453926  |
| SLC35B3  | 51000  | 2237  | 7.948858569 | 8.765881206 | 8.59495453  | 6.967824071 |
| KCTD18   | 130535 | 2959  | 6.009326333 | 5.346779526 | 4.284246597 | 6.225422957 |
| ATHL1    | 80162  | 3270  | 5.437797131 | 5.587853257 | 4.716754611 | 6.747628765 |
| YIPF4    | 84272  | 1982  | 8.97154219  | 9.89368126  | 11.29979047 | 14.09444152 |
| GALNS    | 2588   | 2380  | 7.471259084 | 15.72936598 | 7.900984774 | 19.56245314 |
| DHX35    | 60625  | 3356  | 5.298449529 | 6.042245027 | 5.666158678 | 3.739746574 |
| TSPAN31  | 6302   | 1749  | 10.16672191 | 17.70940147 | 10.99308936 | 25.92570915 |
| PARP16   | 54956  | 2551  | 6.970441638 | 3.319342227 | 6.708767413 | 1.348996735 |
| TMEM205  | 374882 | 1311  | 13.56338415 | 13.93766602 | 11.92606586 | 7.257175102 |
| PUSL1    | 126789 | 1262  | 14.09001317 | 10.2411218  | 10.0452343  | 4.330886925 |
| SLC1A3   | 6507   | 4188  | 4.245844465 | 0.478866801 | 0.605400462 | 1.353392589 |
| ZNF213   | 7760   | 3301  | 5.38673027  | 6.210423204 | 6.208610073 | 7.604113604 |
| TM2D2    | 83877  | 3641  | 4.827577713 | 4.651272738 | 5.222638979 | 5.559705107 |
| KIAA0355 | 9710   | 6683  | 2.63013773  | 1.600474168 | 2.750527344 | 2.574660085 |
| MRPL40   | 64976  | 787   | 22.33444784 | 14.44023751 | 24.16217093 | 35.23856954 |
| CINP     | 51550  | 1065  | 16.50442296 | 15.90167516 | 16.86310302 | 9.693776536 |
| CTNNBIP1 | 56998  | 2995  | 5.86885157  | 4.389692287 | 5.714212244 | 2.568379563 |
| EMP1     | 2012   | 2804  | 6.26861999  | 0.079469574 | 10.39846543 | 0.14438578  |
| ANKRD54  | 129138 | 2149  | 8.179251025 | 6.428862938 | 5.604109538 | 2.731706387 |
| C19orf24 | 55009  | 912   | 19.27325707 | 16.37038364 | 22.47217308 | 12.20788099 |
| YOD1     | 55432  | 6265  | 2.805620184 | 2.916565068 | 2.866592931 | 3.23110715  |
| DGKA     | 1606   | 2801  | 6.275333971 | 5.250609494 | 5.58196085  | 9.322857309 |
| OTUD7B   | 56957  | 6413  | 2.740871737 | 2.397544869 | 3.59114907  | 4.166631828 |

|           |        |       |             |             |             |             |
|-----------|--------|-------|-------------|-------------|-------------|-------------|
| MBD5      | 55777  | 6032  | 2.913993775 | 3.066165921 | 2.872239793 | 11.77926573 |
| SHPK      | 23729  | 3838  | 4.579783859 | 4.644766748 | 4.238907406 | 3.639289094 |
| LINC00174 | 285908 | 4426  | 3.971353469 | 2.56766085  | 3.389339823 | 3.338749886 |
| DLG4      | 1742   | 4323  | 4.065975122 | 2.78347559  | 3.861090943 | 5.946903908 |
| LRRC20    | 55222  | 3176  | 5.534386162 | 4.841138302 | 7.251271722 | 1.274740951 |
| ZC3H8     | 84524  | 1609  | 10.9243073  | 11.77177017 | 12.86880461 | 6.164707449 |
| KIAA1467  | 57613  | 4725  | 3.72004454  | 2.971102463 | 4.069187997 | 4.11284039  |
| CRELD1    | 78987  | 2712  | 6.48127229  | 4.436933988 | 7.167477155 | 5.822069067 |
| RN5-8S1   | 1E+08  | 156   | 112.674426  | 59.99341512 | 136.7933391 | 46.71435299 |
| ANAPC10   | 10393  | 885   | 19.86125475 | 14.35193563 | 23.39650465 | 14.18145707 |
| ZNF580    | 51157  | 1433  | 12.26602265 | 11.0405587  | 9.87863155  | 9.888360368 |
| SLA       | 6503   | 3506  | 5.013465617 | 99.72175766 | 5.001892525 | 219.1150984 |
| FAM177A1  | 283635 | 3276  | 5.365448856 | 4.557322917 | 6.191494838 | 3.707488333 |
| FAM114A2  | 10827  | 2886  | 6.090509512 | 6.949044223 | 4.465824824 | 4.559208625 |
| NOD1      | 10392  | 4506  | 3.90084564  | 5.192505969 | 3.376054775 | 6.109703809 |
| C3orf37   | 56941  | 1809  | 9.716534246 | 9.238502684 | 15.06674086 | 6.042652626 |
| DSCC1     | 79075  | 2291  | 7.672287408 | 5.933126918 | 9.591276814 | 1.678807681 |
| LOC10013  | 1E+08  | 3827  | 4.592947596 | 3.377135018 | 4.803181144 | 2.750535896 |
| TRIO      | 7204   | 10244 | 1.715854203 | 1.805458106 | 1.91814553  | 3.912623474 |
| GALNT3    | 2591   | 3280  | 5.358905626 | 5.43494353  | 5.475367291 | 7.776230711 |
| METTL19   | 152992 | 2863  | 6.139437811 | 3.969426099 | 6.420459042 | 3.252437197 |
| SPRYD3    | 84926  | 2949  | 5.960396898 | 8.840767757 | 5.51676047  | 8.031257025 |
| TOM1      | 10043  | 2425  | 7.248334207 | 4.870157646 | 7.318729878 | 12.85527625 |
| SERPINB1  | 1992   | 1310  | 13.4177179  | 125.5347491 | 18.87047105 | 385.6965206 |
| RNMTL1    | 55178  | 1815  | 9.684413472 | 6.138641453 | 7.799492568 | 4.015117943 |
| JHDM1D    | 80853  | 9178  | 1.915146051 | 0.655533067 | 2.647390233 | 2.117364441 |
| BBS1      | 582    | 3370  | 5.215789452 | 4.09959242  | 4.890270441 | 2.282580651 |
| LONRF3    | 79836  | 2625  | 6.696080172 | 3.395545672 | 5.392792004 | 9.639469665 |
| BCL2L1    | 598    | 2575  | 6.746727877 | 10.47097276 | 6.482134426 | 16.35153534 |
| IPPK      | 64768  | 4401  | 3.947472003 | 4.101215057 | 3.312576354 | 3.587696276 |
| HDAC10    | 83933  | 2720  | 6.387067751 | 9.994701301 | 5.282119034 | 7.367815233 |
| CLP1      | 10978  | 1864  | 9.320184702 | 8.129089358 | 9.861466866 | 8.253537331 |
| MTHFSD    | 64779  | 3108  | 5.589711803 | 5.162147137 | 5.506456136 | 4.428945522 |
| ZNF286A   | 57335  | 5559  | 3.125170765 | 1.52323116  | 2.432492306 | 0.691877747 |
| LRRC57    | 255252 | 2427  | 7.158147624 | 9.365032486 | 9.140873483 | 9.007959291 |
| NAGPA     | 51172  | 2209  | 7.86456509  | 6.25424466  | 6.982248791 | 3.573891197 |
| RPS6KC1   | 26750  | 4206  | 4.13048604  | 3.231762665 | 3.265218614 | 9.721975824 |
| TCF7L2    | 6934   | 4092  | 4.245558232 | 6.698049908 | 3.665986817 | 23.20115756 |
| PHF13     | 148479 | 3670  | 4.733739587 | 4.068062637 | 4.951087051 | 4.633249179 |
| CLN5      | 1203   | 2816  | 6.169326805 | 7.913092498 | 8.103250791 | 9.848279199 |
| GPR137    | 56834  | 1946  | 8.927453383 | 11.22178988 | 7.600171272 | 10.81839761 |
| ST3GAL3   | 6487   | 2549  | 6.815545031 | 7.343250498 | 7.874481102 | 7.623841053 |
| DNASE1    | 1773   | 3108  | 5.589711803 | 6.811166361 | 4.010875457 | 4.559208625 |
| MRPS18C   | 51023  | 1121  | 15.4976131  | 14.90852039 | 17.15157296 | 21.85003784 |
| EVI5L     | 115704 | 3834  | 4.531253073 | 3.894050568 | 2.70030081  | 4.329464466 |
| DGKG      | 1608   | 5818  | 2.986047488 | 3.6768542   | 4.721041419 | 4.314399967 |
| SYT15     | 83849  | 5511  | 3.152390543 | 4.124284856 | 2.415340222 | 3.416055934 |
| ZNF7      | 7553   | 2265  | 7.670121097 | 5.01742469  | 9.514810445 | 5.898589384 |
| TP53INP2  | 58476  | 4124  | 4.212615006 | 13.88651794 | 2.15178467  | 27.24248762 |
| TBKBP1    | 9755   | 4150  | 4.186222719 | 2.631036519 | 5.396671013 | 12.43840001 |
| SSBP2     | 23635  | 1948  | 8.91828762  | 5.147572286 | 9.002379463 | 3.844901401 |
| CENPL     | 91687  | 2693  | 6.45110445  | 6.123140984 | 6.119647748 | 3.532921114 |
| MS4A7     | 58475  | 3024  | 5.677393557 | 0.736880571 | 0.978170191 | 0.535526092 |
| FLCN      | 201163 | 3723  | 4.611452623 | 5.805740107 | 6.639891775 | 14.08248066 |
| SCYL3     | 57147  | 3477  | 4.93771588  | 5.511536062 | 4.25364777  | 4.890429821 |
| LOC25303  | 253039 | 3806  | 4.510887576 | 4.39108023  | 5.273791994 | 5.478237752 |
| TMCO4     | 255104 | 2989  | 5.743873575 | 12.30090096 | 6.503244579 | 12.59677769 |
| COQ7      | 10229  | 2667  | 6.437359623 | 6.26638596  | 6.337750622 | 3.870968133 |
| ZNF238    | 10472  | 4244  | 4.045343571 | 4.252932956 | 3.684041551 | 4.674370539 |
| SETD6     | 79918  | 2985  | 5.751570558 | 2.986032626 | 5.308662346 | 0.542522916 |
| STX8      | 9482   | 988   | 17.37696166 | 17.59205406 | 14.11416422 | 11.26881322 |
| C17orf65  | 339201 | 2252  | 7.623640371 | 9.103289075 | 7.505675359 | 7.370855578 |

|           |          |      |             |             |             |             |
|-----------|----------|------|-------------|-------------|-------------|-------------|
| UBE2E2    | 7325     | 1760 | 9.754794384 | 5.317598159 | 5.642263514 | 5.060721574 |
| PEX16     | 9409     | 1929 | 8.90017528  | 8.432755825 | 7.557619769 | 8.605063122 |
| FAM175A   | 84142    | 2835 | 6.055886461 | 3.772828525 | 6.707452742 | 2.641928723 |
| CYTH1     | 9267     | 3311 | 5.185272762 | 7.604981388 | 5.934606707 | 34.66540782 |
| ZNF623    | 9831     | 4046 | 4.243311447 | 3.249413841 | 3.394342434 | 2.201401377 |
| TRAF3IP2  | 10758    | 2778 | 6.18014331  | 11.06944222 | 4.943667922 | 14.93805504 |
| RMND5B    | 64777    | 1825 | 9.407363351 | 11.35530941 | 9.724887646 | 10.87015264 |
| RNF121    | 55298    | 2723 | 6.304971765 | 7.2831836   | 7.371300892 | 8.697824813 |
| TRMU      | 55687    | 1974 | 8.697283747 | 6.20861077  | 8.455671807 | 4.819734832 |
| AP4B1     | 10717    | 2500 | 6.867375246 | 9.715505055 | 7.944307027 | 6.72063825  |
| C17orf53  | 78995    | 2761 | 6.218195623 | 6.456579058 | 6.121977874 | 3.372592429 |
| ARHGAP23  | 57636    | 5913 | 2.903507207 | 1.281297359 | 3.680421177 | 1.095505431 |
| LOC220729 | 220729   | 1560 | 11.00540905 | 7.427756158 | 8.668092774 | 7.007152948 |
| TARBP2    | 6895     | 1888 | 9.093452392 | 8.615882408 | 9.624199935 | 5.575371225 |
| TAF1A     | 9015     | 1966 | 8.732674525 | 4.873756584 | 8.490079424 | 4.22155818  |
| NUBP1     | 4682     | 1265 | 13.57188784 | 12.50681472 | 15.70021152 | 13.60193941 |
| CTIF      | 9811     | 5828 | 2.945854172 | 0.917636313 | 2.3564704   | 0.972547729 |
| MAP4K3    | 8491     | 4141 | 4.145964288 | 3.87441519  | 2.908290606 | 5.181709605 |
| CYSLTR1   | 10800    | 1537 | 11.17009637 | 19.28220369 | 20.61985309 | 25.8139604  |
| PXMP4     | 11264    | 5727 | 2.997806551 | 2.918186023 | 2.988312497 | 2.297516342 |
| ATP13A2   | 23400    | 3996 | 4.296405935 | 7.806950917 | 4.758665796 | 2.634209428 |
| METTLL15  | 196074   | 4416 | 3.88778037  | 3.279919499 | 5.741433733 | 2.75039216  |
| OSGEPL1   | 64172    | 2339 | 7.34007615  | 3.715465885 | 6.684511475 | 2.077081108 |
| ARID5A    | 10865    | 2223 | 7.631152473 | 7.51797182  | 15.96753932 | 12.47537302 |
| RRAGC     | 64121    | 1442 | 11.76425239 | 9.889938851 | 9.963497762 | 21.89937768 |
| RUFY3     | 22902    | 4435 | 3.825039898 | 1.708300176 | 5.573915914 | 2.556035248 |
| NBPF14    | 25832    | 3689 | 4.59855027  | 5.134393658 | 4.868312474 | 4.499638591 |
| MAD2L1BP1 | 9587     | 1550 | 10.94454964 | 12.93867202 | 10.08714345 | 16.7167061  |
| ZNF865    | 1.01E+08 | 4953 | 3.425005441 | 2.969302886 | 3.156687329 | 2.656546758 |
| MED30     | 90390    | 987  | 17.18748931 | 18.73871614 | 20.12235822 | 17.63817854 |
| BAD       | 572      | 1240 | 13.68068705 | 15.27482113 | 12.60892931 | 8.978699567 |
| ABHD11    | 83451    | 1667 | 10.17639589 | 11.36219448 | 9.505913079 | 5.950218527 |
| RRAGD     | 58528    | 4926 | 3.443778308 | 7.509181012 | 4.031824516 | 9.246141731 |
| PUS3      | 83480    | 1862 | 9.110661626 | 6.462387205 | 10.89330671 | 5.109643694 |
| KLHL28    | 54813    | 6568 | 2.582833731 | 1.66242411  | 2.605673823 | 3.020406299 |
| ZNF358    | 140467   | 2003 | 8.469321991 | 5.117475536 | 6.540017576 | 5.962707396 |
| RAB20     | 55647    | 1530 | 11.08761565 | 22.57455303 | 11.04756922 | 64.96246517 |
| CSRNP2    | 81566    | 4469 | 3.795939125 | 3.09143577  | 4.20772964  | 5.571436595 |
| TNFRSF10B | 8793     | 3561 | 4.763844973 | 6.382739074 | 6.407962434 | 5.911991504 |
| PDE9A     | 5152     | 2103 | 8.066596266 | 0.63575659  | 6.731373757 | 3.176487151 |
| LOC162632 | 162632   | 3901 | 4.348641873 | 5.312340344 | 5.36200753  | 4.047539428 |
| NQO2      | 4835     | 1139 | 14.89381207 | 14.67291603 | 17.06602111 | 19.19430834 |
| TRIP10    | 9322     | 2029 | 8.360794454 | 3.184892981 | 10.10084862 | 2.294659363 |
| DDN       | 23109    | 3744 | 4.530996781 | 0.892759154 | 5.869021149 | 0.324405229 |
| ETFB      | 2109     | 1318 | 12.87105611 | 18.25943092 | 12.0230327  | 12.74779638 |
| TTI2      | 80185    | 2520 | 6.731766646 | 4.686560433 | 6.120550627 | 5.542695057 |
| XRRA1     | 143570   | 5028 | 3.373916457 | 2.570464542 | 3.235665598 | 2.133796686 |
| THSD1P1   | 374500   | 3493 | 4.856585155 | 4.274202656 | 4.415627707 | 2.318108937 |
| ZNF200    | 7752     | 3387 | 5.008577487 | 4.210596936 | 5.863822725 | 4.362948626 |
| FARP2     | 9855     | 4061 | 4.177309024 | 3.621511252 | 4.370332419 | 1.545258496 |
| TOR3A     | 64222    | 2138 | 7.934542539 | 8.963335308 | 9.882355536 | 4.450026454 |
| IFT81     | 28981    | 3160 | 5.303691702 | 1.621883465 | 6.017603963 | 0.960896501 |
| MRPS28    | 28957    | 724  | 23.14870964 | 18.77457703 | 18.09344641 | 7.549142679 |
| GALT      | 2592     | 1347 | 12.44221661 | 16.54288677 | 10.19562694 | 10.97053229 |
| C4orf29   | 80167    | 2200 | 7.6180299   | 12.55966041 | 9.12366015  | 10.30546939 |
| ZNF429    | 353088   | 2361 | 7.098545438 | 5.002173779 | 5.816818928 | 6.087441453 |
| GALK2     | 2585     | 3208 | 5.224334719 | 7.293463809 | 7.310663501 | 6.373227917 |
| RPL22L1   | 200916   | 1978 | 8.473036289 | 8.78713317  | 8.43857237  | 5.833389883 |
| VILL      | 50853    | 2787 | 6.013514811 | 11.51342182 | 5.003514263 | 5.08432738  |
| HYLS1     | 219844   | 2073 | 8.084739884 | 4.084728423 | 7.134555376 | 1.464752988 |
| DNAJC1    | 64215    | 2213 | 7.573278707 | 8.357484335 | 5.823936034 | 11.43407495 |
| DYNLT3    | 6990     | 2230 | 7.515545193 | 6.595048069 | 10.13787868 | 15.43179673 |

|           |          |      |             |             |             |             |
|-----------|----------|------|-------------|-------------|-------------|-------------|
| KCTD7     | 154881   | 5051 | 3.318088652 | 2.470526697 | 3.597404371 | 3.166081998 |
| NAGLU     | 4669     | 2798 | 5.989873402 | 5.893359068 | 6.49409917  | 5.715468254 |
| LIX1L     | 128077   | 1467 | 11.42444838 | 5.620183596 | 10.22577918 | 4.001661231 |
| C16orf70  | 80262    | 2943 | 5.694755617 | 6.738739022 | 6.030553841 | 17.81484047 |
| SLC25A29  | 123096   | 2370 | 7.071588937 | 2.914689125 | 7.577723509 | 2.049912536 |
| FCHO2     | 115548   | 4994 | 3.355960308 | 4.015807294 | 3.553848609 | 5.10733615  |
| BBIP1     | 92482    | 2368 | 7.077561562 | 5.55199679  | 4.996599086 | 5.129109703 |
| DDX12P    | 440081   | 3909 | 4.28745607  | 3.477307181 | 3.729508451 | 1.242847969 |
| SLC18A2   | 6571     | 3885 | 4.313942286 | 10.32429427 | 5.764783708 | 3.595261659 |
| ZSWIM7    | 125150   | 2008 | 8.346447101 | 4.660843008 | 8.73338406  | 4.435692216 |
| C15orf57  | 90416    | 1749 | 9.582427547 | 10.19246128 | 10.99308936 | 16.08782845 |
| SLC9B2    | 133308   | 3377 | 4.962885928 | 5.080875548 | 5.505791827 | 2.697453015 |
| FDX1      | 2230     | 3236 | 5.17913034  | 5.784284771 | 4.635728695 | 2.62732146  |
| RASGRF1   | 5923     | 6414 | 2.61298188  | 0.521124146 | 1.943529922 | 1.167737438 |
| CCDC101   | 112869   | 1160 | 14.44798774 | 14.79147994 | 16.93920932 | 13.08807304 |
| MTMR1     | 8776     | 2732 | 6.134577518 | 6.60667916  | 7.424354718 | 7.705930361 |
| SFMBT1    | 51460    | 4793 | 3.496696386 | 4.184214819 | 3.306145859 | 3.2520389   |
| MCAT      | 27349    | 2086 | 8.034355599 | 6.836669139 | 5.773361169 | 2.1349161   |
| AUH       | 549      | 1601 | 10.34058689 | 5.706520971 | 10.29369855 | 6.069072718 |
| MESDC1    | 59274    | 3068 | 5.396114606 | 5.374712735 | 7.782000663 | 9.237301439 |
| C6orf204  | 387119   | 7653 | 2.163240508 | 2.067309632 | 2.595161057 | 2.645091637 |
| TMEM175   | 84286    | 1809 | 9.151619465 | 14.65842426 | 12.14682984 | 20.36597737 |
| SNX33     | 257364   | 3250 | 5.093932188 | 4.250961986 | 4.615759402 | 12.14573178 |
| DOCK7     | 85440    | 7063 | 2.343944445 | 2.145352196 | 1.705115588 | 1.203739522 |
| LOC10028  | 1E+08    | 1567 | 10.56495189 | 12.37169341 | 11.0563819  | 7.10503348  |
| VRK2      | 7444     | 2076 | 7.974604823 | 11.37777677 | 10.88991785 | 15.01639928 |
| FAHD1     | 81889    | 1755 | 9.433207756 | 8.126092207 | 10.47394544 | 7.497365295 |
| C19orf55  | 148137   | 2146 | 7.714482578 | 8.929921197 | 4.332026794 | 3.301495901 |
| MBIP      | 51562    | 1661 | 9.967055756 | 8.183500162 | 12.97474152 | 8.16540266  |
| PKN3      | 29941    | 3385 | 4.890776842 | 3.554790244 | 3.994748812 | 2.152862353 |
| DOPEY1    | 23033    | 7995 | 2.070704142 | 3.344580634 | 2.24630453  | 7.190718834 |
| CENPM     | 79019    | 947  | 17.48181585 | 15.76535362 | 16.51010807 | 3.206370585 |
| CCDC75    | 253635   | 1257 | 13.17046906 | 17.37279483 | 16.47247941 | 11.91705319 |
| DNAL1     | 83544    | 8584 | 1.928620644 | 2.362275665 | 1.722965202 | 1.58000161  |
| KRCC1     | 51315    | 1774 | 9.332175655 | 20.09764913 | 10.00446446 | 23.04996072 |
| SIGLEC12  | 89858    | 2126 | 7.787055321 | 25.57440032 | 5.465974541 | 67.8888896  |
| C9orf23   | 138716   | 1100 | 15.05025419 | 14.58541209 | 11.52462335 | 8.097154518 |
| C12orf44  | 60673    | 1458 | 11.35478711 | 15.58911786 | 12.60752691 | 9.99648706  |
| PABPC1L   | 80336    | 2129 | 7.776082485 | 5.128605708 | 7.840063949 | 5.039328199 |
| ZNF362    | 149076   | 3158 | 5.242330466 | 10.0902704  | 7.894744091 | 10.96115756 |
| CSF2RB    | 1439     | 4848 | 3.414867907 | 11.72077859 | 5.883548429 | 23.13234119 |
| POLR3K    | 51728    | 824  | 20.09135875 | 17.03696497 | 17.94894817 | 8.843979449 |
| KIAA1009  | 22832    | 5155 | 3.21149944  | 3.155535594 | 3.852719218 | 3.691234358 |
| RAB9A     | 9367     | 1377 | 12.02271577 | 9.871309927 | 15.80416153 | 22.49209588 |
| STMN3     | 50861    | 2255 | 7.341587411 | 3.063331808 | 7.495689982 | 0.807920074 |
| KIAA0895L | 653319   | 3416 | 4.846393329 | 4.044387135 | 3.896645189 | 5.392572169 |
| RGS16     | 6004     | 2432 | 6.807269577 | 1.924130913 | 11.98902018 | 9.155910742 |
| LOC10050  | 1.01E+08 | 3497 | 4.734137721 | 2.485122878 | 2.779267664 | 1.736593048 |
| NENF      | 29937    | 995  | 16.63847197 | 12.76528948 | 17.200066   | 6.713721083 |
| C12orf73  | 728568   | 1720 | 9.625162565 | 6.866355983 | 10.80991802 | 4.119191979 |
| RBFOX2    | 23543    | 6997 | 2.366053968 | 0.95540668  | 1.721199285 | 0.115723232 |
| ZNF407    | 55628    | 8008 | 2.067342609 | 2.08696945  | 2.005200033 | 1.744204738 |
| SUSD1     | 64420    | 3010 | 5.432190513 | 7.47711002  | 9.686809657 | 9.482548065 |
| TMEM177   | 80775    | 1759 | 9.295561935 | 5.067258323 | 9.849545442 | 2.186553949 |
| CHMP6     | 79643    | 1678 | 9.744274996 | 13.01406621 | 8.562195335 | 12.06369863 |
| C14orf49  | 161176   | 3277 | 4.98959214  | 0.543991907 | 3.481653071 | 0.123545232 |
| ZNF28     | 7576     | 4726 | 3.459774322 | 3.253376057 | 2.905947839 | 4.711632443 |
| DCP1B     | 196513   | 2105 | 7.767645341 | 7.304254274 | 10.73989048 | 7.78942418  |
| MUM1      | 84939    | 4188 | 3.904224795 | 1.276978136 | 4.540503468 | 1.788411635 |
| NFKBIB    | 4793     | 2213 | 7.388564593 | 6.8470956   | 10.31123101 | 5.854246376 |
| NIPAL3    | 57185    | 5426 | 3.013434103 | 3.860352445 | 3.543478305 | 4.215713512 |
| OIP5      | 11339    | 1249 | 13.0911877  | 14.80793662 | 16.40882454 | 6.644982691 |

|           |        |      |             |             |             |             |
|-----------|--------|------|-------------|-------------|-------------|-------------|
| EPC1      | 80314  | 2913 | 5.613077049 | 8.797033555 | 6.382787161 | 9.242375137 |
| ZNF616    | 90317  | 3070 | 5.326023923 | 2.104934156 | 5.299324633 | 2.571571875 |
| FAM168A   | 23201  | 1834 | 8.915427177 | 12.75759645 | 10.48359503 | 20.9713653  |
| SIRT2     | 22933  | 2086 | 7.838395706 | 6.729846183 | 9.3184075   | 6.016581737 |
| C16orf62  | 57020  | 3894 | 4.198996775 | 6.752505598 | 4.774796867 | 4.678633196 |
| GFER      | 2671   | 2447 | 6.682016119 | 6.829771702 | 5.957764011 | 4.384442066 |
| DGAT1     | 8694   | 3718 | 4.397765854 | 4.974478976 | 5.796408192 | 4.682324426 |
| GMEB1     | 10691  | 2694 | 6.069373958 | 7.940585648 | 6.274231963 | 7.06321942  |
| YPEL5     | 51646  | 2639 | 6.195867163 | 5.066298251 | 4.803745995 | 17.33570407 |
| LEPR      | 3953   | 5142 | 3.17987037  | 2.643483814 | 2.958479739 | 3.42499243  |
| ZNF175    | 7728   | 3788 | 4.316497741 | 3.411904888 | 4.183304409 | 7.107454798 |
| BTN3A3    | 10384  | 3019 | 5.415996503 | 9.96436318  | 3.359280737 | 26.88770257 |
| COX19     | 90639  | 4896 | 3.339643269 | 4.005162634 | 2.761892305 | 2.85285775  |
| SCFD2     | 152579 | 3204 | 5.103275107 | 5.842055405 | 5.737133033 | 3.411722409 |
| CCDC92    | 80212  | 1814 | 9.013722957 | 10.68712435 | 10.71565493 | 13.05632688 |
| ERCC8     | 1161   | 2044 | 7.999458632 | 5.886969166 | 5.995360156 | 3.169140712 |
| SPNS2     | 124976 | 4349 | 3.759690376 | 0.512376833 | 5.878467722 | 0.372368568 |
| HINFP     | 25988  | 2319 | 6.962702577 | 5.765399346 | 9.11102895  | 6.284984102 |
| NUDT9     | 53343  | 1716 | 9.409386524 | 7.271929106 | 9.973231743 | 9.083346415 |
| ANAPC11   | 51529  | 1130 | 14.28894449 | 16.36735649 | 12.71448121 | 8.419607574 |
| PLD3      | 23646  | 2424 | 6.661100361 | 12.96180221 | 12.4644063  | 20.46001296 |
| LOC100294 | 1E+08  | 3690 | 4.375747229 | 6.159602668 | 5.09602812  | 5.869888438 |
| SIAH1     | 6477   | 2393 | 6.747391256 | 6.98389108  | 6.975134203 | 7.444103611 |
| ING2      | 3622   | 1135 | 14.2259976  | 9.22743276  | 17.12616568 | 3.388677001 |
| GSG2      | 83903  | 2797 | 5.772794879 | 5.895466096 | 6.043182306 | 3.473931148 |
| SLC28A3   | 64078  | 4803 | 3.361754586 | 3.34040252  | 4.486996806 | 1.475121841 |
| CISH      | 1154   | 2285 | 7.066305153 | 5.266067823 | 6.842482425 | 4.783876849 |
| GTF2H5    | 404672 | 7503 | 2.152006834 | 2.168037583 | 2.14016285  | 1.295026712 |
| PRADC1    | 84279  | 1105 | 14.61222378 | 14.11609768 | 18.5471691  | 6.41177394  |
| RPUSD1    | 113000 | 2067 | 7.811566171 | 10.13365862 | 9.915153291 | 5.28841732  |
| KIFAP3    | 22920  | 4120 | 3.919055164 | 3.461478598 | 4.205182144 | 1.375730137 |
| PLEKHH3   | 79990  | 3076 | 5.249189621 | 2.390597723 | 4.464730003 | 1.84265545  |
| KIAA1919  | 91749  | 3930 | 4.108526024 | 3.628827436 | 4.139675986 | 2.781465293 |
| C20orf96  | 140680 | 1615 | 9.997837322 | 8.14063678  | 5.887191493 | 5.515089765 |
| RAB7B     | 338382 | 3032 | 5.325365196 | -           | 15.60942828 | 1.802631695 |
| ZRANB3    | 84083  | 3717 | 4.34396214  | 4.016623588 | 3.978997389 | 1.470427576 |
| C16orf48  | 84080  | 1628 | 9.918002012 | 4.653753858 | 6.359307928 | 3.108551335 |
| NDUFB1    | 4707   | 433  | 36.81783166 | 54.03563949 | 41.96417893 | 46.75031477 |
| DDX28     | 55794  | 2610 | 6.108092378 | 6.830120605 | 6.638065299 | 2.792122248 |
| ZNF627    | 199692 | 2864 | 5.566383068 | 4.512673085 | 5.164082855 | 6.997366422 |
| ATP7A     | 538    | 8488 | 1.878195229 | 0.91884354  | 1.393961668 | 2.551824733 |
| REXO1L1   | 254958 | 7032 | 2.267082069 | 2.313251705 | 2.403694669 | 3.857432827 |
| PLEKHF2   | 79666  | 2977 | 5.355096106 | 6.137816644 | 5.393900525 | 8.295707518 |
| ACBD7     | 414149 | 3383 | 4.712421256 | 3.029944871 | 6.432849666 | 2.513157625 |
| PDRG1     | 81572  | 1384 | 11.51887363 | 9.982389056 | 11.14435519 | 9.214608646 |
| KIF13B    | 23303  | 8774 | 1.816973001 | 3.073028819 | 3.178662925 | 6.090861616 |
| PINX1     | 54984  | 1047 | 15.2264767  | 7.874698506 | 14.5296111  | 3.480152372 |
| SMARCD3   | 6604   | 1728 | 9.22576453  | 2.708036099 | 6.358106245 | 3.86582898  |
| C14orf129 | 51527  | 2110 | 7.555507634 | 6.758906077 | 10.0134958  | 10.36128777 |
| SLITRK4   | 139065 | 8767 | 1.81842376  | 2.694224316 | 2.602800756 | 1.062133877 |
| DYRK3     | 8444   | 2301 | 6.928344679 | 3.776825165 | 5.417557984 | 4.57466357  |
| CNO       | 55330  | 1546 | 10.31185065 | 10.08944886 | 8.609922358 | 8.510915972 |
| HES6      | 55502  | 1386 | 11.50225188 | 3.858574628 | 13.87223181 | 2.19078856  |
| DERL2     | 51009  | 1156 | 13.7907622  | 19.46894564 | 14.43901051 | 18.73692763 |
| IBA57     | 200205 | 7921 | 2.012639958 | 2.841320687 | 2.187268076 | 1.48224644  |
| BTBD10    | 84280  | 2520 | 6.326238535 | 7.869884501 | 6.036707467 | 9.478811837 |
| PPM1K     | 152926 | 3725 | 4.279764056 | 3.050863603 | 3.743568926 | 15.70521917 |
| CD244     | 51744  | 2543 | 6.269021277 | 7.798705836 | 8.14231483  | 7.323419344 |
| FAM200A   | 221786 | 2548 | 6.25671943  | 3.847974148 | 4.394855711 | 5.243447785 |
| ZNF23     | 7571   | 3271 | 4.873775942 | 4.087423138 | 2.842106237 | 2.166007399 |
| ZBTB12    | 221527 | 1865 | 8.548054213 | 5.376659954 | 7.363812058 | 2.713523632 |
| SFXN5     | 94097  | 4140 | 3.850753891 | 6.566567038 | 5.256601551 | 5.965294995 |

|           |        |       |             |             |             |             |
|-----------|--------|-------|-------------|-------------|-------------|-------------|
| QPCTL     | 54814  | 2345  | 6.798345888 | 4.181082358 | 6.036707467 | 2.762355486 |
| SUCNR1    | 56670  | 1650  | 9.66189158  | 51.45409266 | 13.82954802 | 77.78175704 |
| C1GALT1C  | 29071  | 1915  | 8.324867419 | 13.03251211 | 11.03314681 | 17.65306533 |
| PACRGL    | 133015 | 2090  | 7.627809142 | 5.011069944 | 5.357938924 | 2.227686052 |
| FBXL14    | 144699 | 2111  | 7.551928521 | 6.122357042 | 6.005251389 | 4.02748093  |
| WRAP53    | 55135  | 1982  | 8.043451618 | 5.396553415 | 6.929116795 | 2.553340855 |
| TGIF1     | 7050   | 2076  | 7.679249088 | 3.649475569 | 8.956194123 | 11.11603583 |
| HRAS      | 3265   | 1251  | 12.74350208 | 6.590575008 | 10.97802517 | 4.045340986 |
| CLDN12    | 9069   | 3684  | 4.271915022 | 3.326763752 | 3.613175886 | 6.37398157  |
| ZNF174    | 7727   | 2498  | 6.300134083 | 5.352266247 | 6.512780875 | 3.241454971 |
| KIAA1804  | 84451  | 5809  | 2.709198647 | 0.613758471 | 2.436921847 | 0.209084727 |
| CYB5D1    | 124637 | 3760  | 4.185567803 | 2.785408559 | 4.495420454 | 1.507448979 |
| MAPK12    | 6300   | 1778  | 8.851369482 | 5.263764206 | 7.605300746 | 1.480076051 |
| LYPLAL1   | 127018 | 1892  | 8.318041723 | 6.359918063 | 6.700362411 | 3.423743982 |
| FAM63A    | 55793  | 2851  | 5.520075391 | 6.721715499 | 4.520649051 | 8.449328198 |
| ZNF319    | 57567  | 4220  | 3.729321076 | 3.907492576 | 2.202969076 | 2.638290868 |
| VAMP4     | 8674   | 5155  | 3.052906875 | 2.507137869 | 3.729760094 | 3.455623655 |
| LACC1     | 144811 | 4288  | 3.670180723 | 5.144691182 | 6.3562813   | 12.69901216 |
| KPTN      | 11133  | 1688  | 9.323302689 | 9.504711671 | 8.636640127 | 6.355882545 |
| GEMIN2    | 8487   | 1368  | 11.50419221 | 6.189796798 | 10.65690682 | 3.255434931 |
| CXorf23   | 256643 | 6494  | 2.423427    | 2.607835547 | 2.114799736 | 4.114661212 |
| MIB2      | 142678 | 3350  | 4.697831325 | 4.656205353 | 6.874638504 | 4.471562943 |
| ZNF529    | 57711  | 5242  | 3.002238638 | 2.508036704 | 3.022960149 | 1.930836159 |
| USE1      | 55850  | 877   | 17.94496572 | 13.46651345 | 13.00955201 | 6.462951155 |
| EFEMP2    | 30008  | 2096  | 7.508461326 | 2.870459202 | 8.165107667 | 4.732354144 |
| TLE1      | 7088   | 3283  | 4.793705434 | 4.479731097 | 2.188145564 | 0.801576369 |
| IQCE      | 23288  | 6861  | 2.293796085 | 5.813591396 | 2.740758455 | 3.156957927 |
| FAM18B1   | 51030  | 1821  | 8.642358561 | 8.810518013 | 8.237901184 | 12.56148353 |
| PODXL2    | 50512  | 2171  | 7.249071828 | 3.695060641 | 9.829461491 | 4.941837741 |
| COA5      | 493753 | 1698  | 9.268395135 | 9.57996819  | 9.581228872 | 7.391395467 |
| MIDN      | 90007  | 3812  | 4.128471915 | 19.9918096  | 6.152310732 | 29.95012558 |
| CNPPD1    | 27013  | 2100  | 7.494159495 | 9.125528994 | 10.1617909  | 7.229602248 |
| SLC25A25  | 114789 | 3433  | 4.584251366 | 4.348904712 | 3.877349247 | 4.540350261 |
| RNF135    | 84282  | 2254  | 6.982136175 | 4.547605811 | 6.936589326 | 9.699342147 |
| UNKL      | 64718  | 5109  | 3.08039439  | 1.177624288 | 2.315902649 | 2.218832712 |
| ZNF681    | 148213 | 6513  | 2.416357276 | 2.326519663 | 1.784225683 | 1.24322962  |
| C16orf42  | 115939 | 1214  | 12.96353784 | 8.259860637 | 10.26836979 | 7.503541049 |
| LINC00341 | 79686  | 2840  | 5.469489004 | 0.706159916 | 4.538158607 | 0.071277769 |
| TOB1      | 10140  | 1830  | 8.488168727 | 14.12491335 | 10.62196614 | 8.738732335 |
| RAB23     | 51715  | 3037  | 5.114701604 | 3.30176846  | 4.730775032 | 1.466392817 |
| C1orf124  | 83932  | 3854  | 4.030448565 | 3.584749988 | 3.398976441 | 3.046412572 |
| UBE2F     | 140739 | 2206  | 7.041409234 | 5.454653208 | 10.91861414 | 17.71023144 |
| CAST      | 831    | 4550  | 3.413922807 | 7.101261382 | 4.504312495 | 10.09919822 |
| DNAH1     | 25981  | 13126 | 1.183403076 | 2.393677324 | 1.287732813 | 2.575470068 |
| TPMT      | 7172   | 3258  | 4.767755915 | 4.856083676 | 5.706893493 | 8.512202033 |
| ZNF519    | 162655 | 6810  | 2.28096164  | 0.850756212 | 1.396154811 | 0.653955211 |
| SUPT3H    | 8464   | 2500  | 6.213339509 | 4.100121399 | 3.7186118   | 2.18623172  |
| CCDC56    | 28958  | 772   | 20.1209181  | 21.93689643 | 24.90532809 | 11.79960989 |
| SESN1     | 27244  | 3212  | 4.836036355 | 3.260627703 | 5.130825463 | 2.646952753 |
| GADD45B   | 4616   | 1393  | 11.15100414 | 6.078709275 | 6.977099083 | 24.84948713 |
| MARVELD1  | 83742  | 3250  | 4.77949193  | 5.073728822 | 5.070834273 | 0.747429648 |
| MED19     | 219541 | 1605  | 9.678098923 | 8.746703513 | 11.05789405 | 7.819681933 |
| LOC38979  | 389791 | 2121  | 7.32359678  | 8.19469562  | 6.67424753  | 8.49418614  |
| ATG4A     | 115201 | 2326  | 6.678137907 | 5.364845376 | 8.629429204 | 7.310414655 |
| C7orf31   | 136895 | 3609  | 4.304058956 | 4.630770672 | 4.800595852 | 5.216371365 |
| PDLIM2    | 64236  | 4608  | 3.370952424 | 6.238154586 | 2.842807119 | 8.873834704 |
| NPC2      | 10577  | 921   | 16.86574242 | 61.21245303 | 24.77606322 | 161.5474639 |
| PMS2P3    | 5387   | 1518  | 10.23277258 | 9.835171197 | 10.99571551 | 7.46773144  |
| FOXO4     | 4303   | 3365  | 4.616151195 | 4.966553152 | 4.834747883 | 8.000903053 |
| FAM58A    | 92002  | 1308  | 11.87564891 | 7.66626209  | 14.3764096  | 5.726198723 |
| TTC7B     | 145567 | 3443  | 4.511573852 | 1.747453525 | 5.952547735 | 3.292482232 |
| LOC44145  | 441454 | 1381  | 11.24789918 | 10.00407419 | 13.31048098 | 8.941463172 |

|          |        |       |             |             |             |             |
|----------|--------|-------|-------------|-------------|-------------|-------------|
| KANK2    | 25959  | 5224  | 2.9734588   | 0.725144648 | 3.882721495 | 0.542496953 |
| STARD9   | 57519  | 15584 | 0.996749793 | 0.243079802 | 1.057508431 | 0.064947659 |
| ZNRF3    | 84133  | 6696  | 2.319795217 | 0.965075845 | 2.902956697 | 0.241850493 |
| ST7      | 7982   | 2970  | 5.16126687  | 8.628201598 | 6.118009925 | 3.476051182 |
| ZNF490   | 57474  | 6098  | 2.513768876 | 2.302141545 | 1.905651341 | 3.950317267 |
| RAB38    | 23682  | 1479  | 10.36441014 | 3.917275053 | 11.14280689 | 5.611618243 |
| DHRS7B   | 25979  | 1377  | 11.13214423 | 21.36086738 | 12.7353923  | 14.5537091  |
| PPP1R21  | 129285 | 3220  | 4.760547392 | 6.851067015 | 5.052461685 | 8.926987124 |
| FANCL    | 55120  | 1753  | 8.744416773 | 8.135363276 | 8.919037274 | 7.967821759 |
| GLIPR2   | 152007 | 1900  | 8.067875054 | 8.796027029 | 6.227340335 | 13.95693739 |
| C11orf21 | 29125  | 2262  | 6.77672971  | 7.289840261 | 6.912056738 | 2.595241833 |
| TUBD1    | 51174  | 2505  | 6.119346349 | 3.647161706 | 5.229403275 | 2.909157312 |
| SIDT2    | 51092  | 3919  | 3.911447462 | 4.037030012 | 5.445205639 | 11.72527479 |
| C16orf5  | 29965  | 2774  | 5.525941818 | 6.345992103 | 6.626450699 | 5.473022611 |
| GUSBP1   | 728411 | 4245  | 3.61106304  | 2.887113701 | 3.284992756 | 2.241261851 |
| C22orf39 | 128977 | 1988  | 7.710745776 | 6.949510289 | 7.864724517 | 3.971189967 |
| PHKA1    | 5255   | 6177  | 2.48161933  | 0.974013678 | 1.881279242 | 0.262171103 |
| ROMO1    | 140823 | 477   | 32.13618994 | 26.62780509 | 36.32148937 | 25.88712922 |
| ALS2CR8  | 79800  | 5929  | 2.585421252 | 3.720768391 | 1.496704331 | 2.663088432 |
| SETMAR   | 6419   | 2190  | 6.999526303 | 6.003254977 | 5.595669479 | 1.941098686 |
| SH3RF3   | 344558 | 5608  | 2.733409879 | 10.09263586 | 3.390803945 | 13.71664906 |
| MCAM     | 4162   | 3332  | 4.600528993 | 0.601889004 | 5.389917382 | 1.215059201 |
| ISL2     | 64843  | 1836  | 8.349108172 | 5.340216846 | 7.710282686 | 6.725577691 |
| DYRK4    | 8798   | 1860  | 8.241377744 | 14.61590728 | 9.541892449 | 9.903777704 |
| ZNF440   | 126070 | 4181  | 3.666338819 | 4.317016853 | 3.739553298 | 2.372402364 |
| RN7SL1   | 6029   | 299   | 51.26743346 | 31.30091224 | 58.65095382 | 48.06839221 |
| C9orf82  | 79886  | 2987  | 5.131892401 | 4.103045752 | 4.880699208 | 3.862887576 |
| DEPDC5   | 9681   | 5394  | 2.841854394 | 3.84194284  | 3.368648401 | 4.203194781 |
| RABEP2   | 79874  | 2280  | 6.723229212 | 7.720957059 | 5.467456544 | 7.457905477 |
| FLJ90757 | 440465 | 4421  | 3.467306628 | 7.056452356 | 2.532931996 | 5.357199042 |
| ANKRA2   | 57763  | 2198  | 6.97405032  | 3.649670906 | 7.593947292 | 6.354682231 |
| MYEOV2   | 150678 | 759   | 20.19626166 | 14.67936    | 25.6102741  | 12.00171124 |
| SYCP2L   | 221711 | 3139  | 4.883390444 | 6.175993492 | 4.644360794 | 15.09026885 |
| C19orf54 | 284325 | 2769  | 5.462107777 | 6.035554841 | 5.264950716 | 6.06774851  |
| PIGH     | 5283   | 1439  | 10.51047702 | 9.600852296 | 14.53592173 | 13.08261588 |
| ZFYVE1   | 53349  | 4501  | 3.360270259 | 3.366501347 | 4.88194072  | 7.600639378 |
| MED9     | 55090  | 2222  | 6.80674007  | 5.415375777 | 6.751223248 | 6.194942701 |
| ZNF187   | 7741   | 2838  | 5.329308117 | 6.124365543 | 4.541356745 | 4.564991976 |
| KCTD13   | 253980 | 1750  | 8.642615106 | 10.69596887 | 7.48551726  | 12.60842632 |
| ZNF649   | 65251  | 3234  | 4.676739776 | 2.825027852 | 3.331948927 | 2.065600642 |
| TM2D3    | 80213  | 1421  | 10.64361466 | 7.840699674 | 10.85417845 | 11.9662382  |
| LRG1     | 116844 | 1780  | 8.496953053 | 173.5090455 | 6.053664511 | 301.596261  |
| MACROD1  | 28992  | 1277  | 11.84383433 | 5.583904394 | 7.941792126 | 2.536305252 |
| CEP76    | 79959  | 2884  | 5.244305283 | 3.940522511 | 5.274792933 | 1.82494814  |
| WDR4     | 10785  | 2155  | 7.018364935 | 5.997353    | 6.961122068 | 1.690821129 |
| EPHB4    | 2050   | 4369  | 3.461793645 | 1.020062645 | 3.14339883  | 0.092665994 |
| KAT2B    | 8850   | 4824  | 3.135277039 | 6.697914446 | 4.423665194 | 6.797984204 |
| DLEU2    | 8847   | 2768  | 5.464081082 | 5.393710216 | 5.037859194 | 5.923676987 |
| UEVLD    | 55293  | 2136  | 7.080794211 | 7.511214092 | 5.737133033 | 7.107755019 |
| SLC25A26 | 115286 | 2686  | 5.630892195 | 5.392451418 | 6.528903646 | 3.089941691 |
| ATOX1    | 475    | 498   | 30.37063541 | 31.76931851 | 36.48692666 | 39.42891507 |
| WASL     | 8976   | 4430  | 3.414125606 | 3.873164046 | 3.863220242 | 4.432415284 |
| CDKN2D   | 1032   | 1416  | 10.68119805 | 32.88985248 | 7.311407702 | 30.73602086 |
| NAT9     | 26151  | 1943  | 7.784136096 | 7.225146237 | 8.481838078 | 4.167346638 |
| MCM9     | 254394 | 4822  | 3.136577444 | 3.835568817 | 4.776034631 | 2.770697834 |
| ZNF668   | 79759  | 2865  | 5.279084271 | 4.666653084 | 4.351064894 | 4.098036318 |
| CHRNA5   | 1138   | 3646  | 4.148265616 | 2.139095986 | 2.317989702 | 0.999374529 |
| ATF7IP2  | 80063  | 3609  | 4.190794246 | 3.828103756 | 3.044280297 | 2.748410719 |
| C1orf86  | 199990 | 4543  | 3.329204586 | 3.727775488 | 3.627605412 | 2.851738329 |
| TMEM183  | 92703  | 2220  | 6.812872268 | 8.933382406 | 10.37389144 | 4.923945315 |
| TRPT1    | 83707  | 1077  | 14.04324646 | 11.17266943 | 10.78984389 | 12.40511138 |
| DDIT3    | 1649   | 1191  | 12.69905662 | 14.21938207 | 9.93446401  | 81.7533863  |

|           |        |       |             |             |             |             |
|-----------|--------|-------|-------------|-------------|-------------|-------------|
| DNAJB4    | 11080  | 2250  | 6.722033971 | 6.140278424 | 5.728164641 | 13.40528915 |
| MICALL1   | 85377  | 3882  | 3.896078422 | 4.821727336 | 5.442678036 | 5.527423873 |
| NCAM1     | 4684   | 5981  | 2.528770512 | 1.005932534 | 4.133141127 | 0.270762565 |
| THSD7A    | 221981 | 10607 | 1.425905198 | 0.105040391 | 0.199193704 | -           |
| BACE1     | 23621  | 5864  | 2.544370782 | 1.748005371 | 2.450096141 | 1.03561833  |
| NAGK      | 55577  | 1801  | 8.284392153 | 20.16753338 | 8.798643588 | 63.95448252 |
| GIPC1     | 10755  | 1947  | 7.663169115 | 6.523607103 | 3.906651982 | 7.693752367 |
| LOC100133 | 1E+08  | 2162  | 6.901105581 | 8.451563436 | 8.697661314 | 6.366865255 |
| BMP1      | 649    | 3872  | 3.853354924 | 3.740734635 | 3.983416214 | 1.829806354 |
| EIF3C     | 8663   | 3265  | 4.569736682 | 2.79820523  | 2.588480997 | 0.867995124 |
| ALKBH8    | 91801  | 4085  | 3.652433358 | 3.491136309 | 4.448100239 | 1.932613379 |
| ARRDC3    | 57561  | 4178  | 3.571132185 | 14.18704982 | 7.433906156 | 36.87131755 |
| ZFYVE21   | 79038  | 1524  | 9.790151094 | 7.89564631  | 8.872850871 | 4.383302151 |
| PFN1P2    | 767846 | 1913  | 7.799367625 | 8.153835824 | 8.062617658 | 5.185057127 |
| LOC100233 | 1E+08  | 2502  | 5.963305462 | 12.3795936  | 5.32011989  | 13.26871844 |
| ZNF75D    | 7626   | 3293  | 4.530880737 | 6.631522352 | 3.721383589 | 9.651178708 |
| TMEM101   | 84336  | 1563  | 9.545867094 | 8.268903209 | 11.21985617 | 8.547859856 |
| PTPN4     | 5775   | 3963  | 3.764872639 | 5.341686866 | 3.198860884 | 2.451825744 |
| CHST13    | 166012 | 1747  | 8.540463805 | 0.255103245 | 8.465903432 | 0.347616822 |
| CXXC5     | 51523  | 1447  | 10.31111974 | 52.05075843 | 9.052975262 | 67.98923801 |
| XPA       | 7507   | 1722  | 8.664454278 | 9.964063139 | 10.55196834 | 6.935715978 |
| CSF1R     | 1436   | 4006  | 3.724460875 | 5.117475536 | 5.801628495 | 20.51575596 |
| NUBPL     | 80224  | 3072  | 4.856832769 | 4.13459083  | 4.057877904 | 1.51558068  |
| TATDN3    | 128387 | 2609  | 5.718739083 | 5.124553884 | 5.587830025 | 9.776173527 |
| SRGAP2P2  | 647135 | 1033  | 14.44355302 | 8.412850634 | 8.385939222 | 21.35987034 |
| OLIG1     | 116448 | 2293  | 6.506842681 | 11.4671857  | 16.9543812  | 16.77343391 |
| METTL6    | 131965 | 2499  | 5.970464293 | 6.330980639 | 6.848365614 | 6.723327581 |
| PELO      | 53918  | 2941  | 5.073169081 | 6.894856957 | 6.178337122 | 9.085552503 |
| WDR52     | 55779  | 10277 | 1.451804054 | 1.127498259 | 2.364284086 | 1.122744496 |
| DDI2      | 84301  | 2680  | 5.567235174 | 3.242714442 | 5.360956632 | 3.550058417 |
| CASP1     | 834    | 1364  | 10.93855591 | 20.91098508 | 8.674447681 | 105.8150875 |
| TOR2A     | 27433  | 2509  | 5.946668102 | 10.30234812 | 8.084231603 | 8.632876977 |
| LRR37B    | 114659 | 3031  | 4.85509868  | 4.190518981 | 5.925174766 | 4.675031477 |
| TBCC      | 6903   | 1675  | 8.785554686 | 11.57399616 | 10.46963295 | 20.78672503 |
| FER       | 2241   | 2950  | 4.988408169 | 4.985409218 | 4.225695227 | 4.25443712  |
| MTERF     | 7978   | 2163  | 6.803423069 | 8.035575317 | 6.153925088 | 8.235663403 |
| CENPQ     | 55166  | 1753  | 8.394640102 | 6.737097713 | 7.593234436 | 3.810697363 |
| PI4KAP1   | 728233 | 2360  | 6.235510211 | 4.815452086 | 4.29731718  | 3.087897909 |
| ALDH6A1   | 4329   | 2183  | 6.741092121 | 6.737039484 | 6.000758225 | 3.245538343 |
| COMMD10   | 51397  | 1456  | 10.10700831 | 11.17224312 | 13.93086339 | 10.42731094 |
| MMD       | 23531  | 2723  | 5.404261513 | 3.846175609 | 5.043521663 | 1.784169192 |
| SEC11C    | 90701  | 793   | 18.55713001 | 25.57096382 | 25.04510412 | 16.33726006 |
| CFL2      | 1073   | 3267  | 4.504378359 | 6.138641453 | 3.298292877 | 2.602391259 |
| HK1       | 3098   | 3979  | 3.698367454 | 0.560021826 | 8.495994425 | 3.510327103 |
| DGAT2     | 84649  | 2485  | 5.921852756 | 4.752568326 | 6.461827712 | 9.775236843 |
| PAFAH1B3  | 5050   | 1108  | 13.28141164 | 7.642276192 | 11.63210329 | 4.202043184 |
| ABHD5     | 51099  | 5370  | 2.740373203 | 2.448254823 | 2.203342018 | 2.186382505 |
| PHACTR3   | 116154 | 2728  | 5.394356341 | 1.715354245 | 16.03223812 | 2.151919731 |
| LOC399744 | 399744 | 5270  | 2.792372694 | 4.48202364  | 2.485703075 | 4.839855167 |
| PIAS4     | 51588  | 1835  | 8.019511771 | 8.25755998  | 10.13245722 | 9.928391099 |
| TIGD1     | 200765 | 2448  | 6.011357884 | 5.643638257 | 5.351166342 | 3.307661159 |
| ECM1      | 1893   | 2242  | 6.563694959 | 1.192681631 | 4.335012945 | 1.534920013 |
| GAA       | 2548   | 3782  | 3.891011131 | 6.068684963 | 4.189941063 | 11.7218194  |
| C9orf21   | 195827 | 1242  | 11.84847351 | 4.664774399 | 11.7380423  | 4.889586062 |
| FECH      | 2235   | 7295  | 2.01724525  | 2.413129828 | 2.05636985  | 2.247667978 |
| C22orf25  | 128989 | 2271  | 6.479878511 | 13.34444964 | 7.908060201 | 12.30082919 |
| C18orf8   | 29919  | 2173  | 6.772114174 | 9.229149391 | 10.79273286 | 12.85558357 |
| CCDC94    | 55702  | 1441  | 10.21221659 | 8.195789238 | 11.14340171 | 11.23824361 |
| FOXC1     | 2296   | 3452  | 4.262979171 | 10.7155926  | 3.733595146 | 10.2035406  |
| NAIF1     | 203245 | 3408  | 4.318017635 | 4.511577244 | 4.153779053 | 4.3954624   |
| PRMT6     | 55170  | 2665  | 5.521877711 | 5.43494353  | 6.976757598 | 2.202790629 |
| C2orf42   | 54980  | 2540  | 5.793623661 | 5.263764206 | 5.739625407 | 5.419355386 |



|           |        |       |             |             |             |             |
|-----------|--------|-------|-------------|-------------|-------------|-------------|
| CLK4      | 57396  | 2524  | 5.830350277 | 3.619706844 | 6.529402292 | 6.656733607 |
| HDDC3     | 374659 | 1064  | 13.83064295 | 15.07890348 | 11.1202506  | 4.375811887 |
| RPA3      | 6119   | 1613  | 9.123251146 | 13.26220566 | 11.39601627 | 6.023921526 |
| ZNF830    | 91603  | 1657  | 8.880992214 | 9.279091881 | 11.47593755 | 6.474791633 |
| LINS      | 55180  | 2512  | 5.776838348 | 6.564338643 | 7.065254759 | 5.560346952 |
| KIAA1609  | 57707  | 5031  | 2.884400304 | 2.170304423 | 2.309811543 | 4.506466438 |
| BCL9      | 607    | 6278  | 2.311471477 | 0.816366956 | 2.153906455 | 2.418312316 |
| SGK223    | 157285 | 4627  | 3.136247662 | 2.359801503 | 2.237508819 | 3.062463887 |
| TXNDC5    | 81567  | 3231  | 4.491308552 | 1.931078667 | 4.773688511 | 1.06508532  |
| B3GNT1    | 11041  | 2077  | 6.986720236 | 2.789431778 | 8.239800515 | 1.267007809 |
| MPZ       | 4359   | 1980  | 7.328998955 | 15.7558464  | 4.801926395 | 27.50169906 |
| ERRFI1    | 54206  | 3144  | 4.615590945 | 1.275759645 | 4.636974725 | 7.79067825  |
| CYB561D1  | 284613 | 5125  | 2.831496182 | 4.9566685   | 3.009519528 | 7.030700021 |
| TRMT61B   | 55006  | 1856  | 7.818651903 | 5.402732119 | 7.058003882 | 1.963210955 |
| CORO7     | 79585  | 3854  | 3.765287476 | 6.244403205 | 3.727909645 | 6.61806869  |
| CCDC8     | 83987  | 3336  | 4.349945423 | 4.208171205 | 6.206806539 | 1.51700287  |
| CCDC53    | 51019  | 923   | 15.72201293 | 21.48657524 | 18.99960476 | 28.51110746 |
| RPL26L1   | 51121  | 723   | 20.07111747 | 12.94463729 | 22.20973978 | 12.31932223 |
| CNTNAP1   | 8506   | 5471  | 2.652425138 | 0.570217069 | 1.892332902 | 0.555005108 |
| PPP1R3E   | 90673  | 4521  | 3.209780564 | 3.351608618 | 3.131183148 | 2.193986792 |
| RNFT1     | 51136  | 2031  | 7.144962054 | 8.88697561  | 10.71508145 | 23.22300594 |
| C10orf54  | 64115  | 4774  | 3.039676986 | 111.9297817 | 8.187616433 | 174.3160988 |
| ARID5B    | 84159  | 7948  | 1.825794908 | 0.112145287 | 2.445671621 | 1.27345787  |
| AKIP1     | 56672  | 1528  | 9.497001264 | 12.10413144 | 8.296522043 | 13.6454011  |
| NECAB3    | 63941  | 2063  | 7.034133752 | 4.860625697 | 7.578803849 | 7.261141958 |
| MFSD3     | 113655 | 1468  | 9.885162078 | 10.17015659 | 7.340274407 | 2.619992095 |
| SLC35E3   | 55508  | 2347  | 6.182964606 | 5.886504667 | 6.661726604 | 3.708752069 |
| YIPF1     | 54432  | 1924  | 7.542317012 | 8.802122682 | 12.51895156 | 11.78380075 |
| ATXN7L2   | 127002 | 2413  | 6.013849122 | 2.03162829  | 4.027807303 | 2.936183259 |
| UPRT      | 139596 | 2570  | 5.646466121 | 8.063595207 | 6.90580543  | 10.1608262  |
| GNPDA1    | 10007  | 2311  | 6.279280801 | 9.449417181 | 10.788231   | 14.27776056 |
| TNFSF14   | 8740   | 2894  | 5.014311656 | 0.46198898  | 7.373794367 | 2.378224375 |
| ZNF74     | 7625   | 3868  | 3.751659238 | 2.938073144 | 3.605169144 | 1.2560219   |
| NMNAT1    | 64802  | 3781  | 3.837984113 | 4.891592921 | 4.358691189 | 4.229537205 |
| THAP7     | 80764  | 1271  | 11.41732331 | 7.889434157 | 10.47280879 | 4.778021942 |
| NXT1      | 29107  | 1176  | 12.3396411  | 10.99004738 | 12.93580172 | 4.131201285 |
| FBXL13    | 222235 | 3116  | 4.657066088 | 7.723340806 | 5.831350923 | 12.34322335 |
| FIG4      | 9896   | 3123  | 4.64662758  | 5.42276146  | 4.93877284  | 9.398714418 |
| STK11IP   | 114790 | 3602  | 4.028711252 | 4.639769949 | 5.279186153 | 4.945513587 |
| SLC39A4   | 55630  | 2342  | 6.10889486  | 2.568950678 | 5.232500495 | 0.777907671 |
| HOXC10    | 3226   | 2017  | 7.093223482 | 9.611523834 | 7.123135237 | 7.727824714 |
| SNHG12    | 85028  | 758   | 18.87471209 | 17.05052205 | 19.23304556 | 12.01754463 |
| WVOX      | 51741  | 2488  | 5.750414696 | 6.80678619  | 5.095291673 | 3.254483327 |
| FMNL3     | 91010  | 11192 | 1.278326641 | 2.727669568 | 2.699581922 | 5.426077456 |
| ZNF764    | 92595  | 2817  | 5.078818517 | 4.034244559 | 3.000138606 | 3.880425488 |
| LOC10027  | 1E+08  | 2049  | 6.982445956 | 8.917657466 | 7.836818869 | 8.298694235 |
| LSM10     | 84967  | 869   | 16.46378799 | 12.05194037 | 19.93711212 | 20.03323615 |
| SLC25A16  | 8034   | 2264  | 6.319360319 | 7.086551812 | 7.652539943 | 5.096486391 |
| C4orf52   | 389203 | 1021  | 14.01276372 | 17.02345682 | 12.41634249 | 10.50806047 |
| FAM76A    | 199870 | 3462  | 4.132591497 | 3.218265233 | 3.600751277 | 3.332884225 |
| POP5      | 51367  | 801   | 17.86146288 | 19.1953249  | 21.62965098 | 9.097926425 |
| NHEJ1     | 79840  | 2119  | 6.751784692 | 3.680577615 | 6.580837305 | 2.292728981 |
| C6orf35   | 729515 | 5046  | 2.835321396 | 1.766410501 | 3.140379925 | 1.524434561 |
| C9orf100  | 84904  | 3763  | 3.802028106 | 4.974208216 | 3.705765147 | 2.097987153 |
| C14orf142 | 84520  | 1191  | 12.01262113 | 8.793565225 | 15.61130059 | 5.778825643 |
| DFFB      | 1677   | 3034  | 4.715567489 | 5.067717616 | 6.128233026 | 2.602084923 |
| ZFYVE9    | 9372   | 4930  | 2.90203484  | 1.807973101 | 2.914272571 | 1.519242988 |
| EXOSC5    | 56915  | 1006  | 14.22170155 | 14.61924174 | 16.38191987 | 5.432981411 |
| TRIM52    | 84851  | 2244  | 6.375682604 | 5.759490069 | 6.496723946 | 4.330029154 |
| TAF6L     | 10629  | 2176  | 6.574922685 | 6.04187886  | 5.437475476 | 3.907174745 |
| ALKBH7    | 84266  | 1331  | 10.74908472 | 13.05856455 | 11.58811989 | 5.627248632 |
| N6AMT1    | 29104  | 4883  | 2.929967594 | 2.874966033 | 3.072131488 | 0.746205106 |

|           |          |      |             |             |             |             |
|-----------|----------|------|-------------|-------------|-------------|-------------|
| HEATR5A   | 25938    | 7856 | 1.821159848 | 1.304773867 | 2.743259376 | 2.087161138 |
| DPCD      | 25911    | 858  | 16.67486219 | 13.24529944 | 12.80513705 | 3.538966136 |
| ZNF136    | 7695     | 3035 | 4.71401376  | 4.47867999  | 4.037731848 | 5.53594584  |
| ZGLP1     | 1E+08    | 1997 | 7.164262275 | 6.471855641 | 7.723479008 | 4.966957579 |
| FKBP14    | 55033    | 2247 | 6.367170344 | 10.7102492  | 5.64178268  | 9.549381163 |
| SLC30A1   | 7779     | 2034 | 7.03393892  | 7.121005166 | 9.660512688 | 17.61549102 |
| DOM3Z     | 1797     | 1590 | 8.998133184 | 5.325561019 | 7.57435937  | 4.965236261 |
| ICA1L     | 130026   | 7996 | 1.789273607 | 1.532741078 | 1.691123653 | 0.784804246 |
| C7orf43   | 55262    | 2563 | 5.582142709 | 18.25784775 | 6.347610856 | 33.25109298 |
| BBS4      | 585      | 2509 | 5.702284481 | 7.371507706 | 5.978962956 | 6.696530739 |
| ASB13     | 79754    | 2817 | 5.078818517 | 4.508861566 | 6.750311865 | 3.808565757 |
| CNNM4     | 26504    | 4814 | 2.971963391 | 2.314423398 | 3.68673036  | 4.289103453 |
| SERGEF    | 26297    | 1515 | 9.30867696  | 8.2367197   | 7.252018212 | 3.34041028  |
| S100A6    | 6277     | 683  | 20.64809018 | 9.787672829 | 25.36654529 | 5.631256803 |
| MZF1      | 7593     | 2938 | 4.800083593 | 6.370982137 | 4.818270596 | 4.685215344 |
| TSKU      | 25987    | 2725 | 5.175282787 | 0.817734623 | 4.341998766 | 0.445714928 |
| C4orf33   | 132321   | 1873 | 7.529442389 | 7.019289055 | 5.076248938 | 15.88736938 |
| C6orf47   | 57827    | 2475 | 5.698038624 | 9.723608061 | 5.463525142 | 16.76683511 |
| KCTD21    | 283219   | 3396 | 4.152722496 | 2.559032599 | 5.039477524 | 3.576481678 |
| FUT7      | 2529     | 2428 | 5.808338383 | 3.303944255 | 6.265445971 | 1.667453566 |
| EPCAM     | 4072     | 1731 | 8.147108951 | 6.565261076 | 16.96625178 | 4.209959022 |
| PODXL     | 5420     | 6007 | 2.347701947 | 1.224151589 | 2.637981871 | 1.752339083 |
| SIGLEC10  | 89790    | 3400 | 4.14783694  | 17.10568551 | 7.892107263 | 36.91349854 |
| TSSC4     | 10078    | 1443 | 9.77314317  | 10.19193153 | 7.321024302 | 6.733600431 |
| FBXW4     | 6468     | 2303 | 6.12359774  | 9.288726763 | 5.688083024 | 11.95411436 |
| SLC10A7   | 84068    | 3783 | 3.727899972 | 6.12598446  | 5.250004644 | 6.581747328 |
| NUDT16L1  | 84309    | 1437 | 9.813949614 | 5.582447217 | 7.498624098 | 5.071286755 |
| NOMO2     | 283820   | 4317 | 3.266769885 | 4.542338721 | 3.768572301 | 5.626931562 |
| SEMA3G    | 56920    | 4700 | 3.000562893 | 0.142233629 | 2.832114886 | 0.129209913 |
| TECPR1    | 25851    | 4371 | 3.226411712 | 6.627373374 | 2.99694697  | 7.178328474 |
| RASSF8    | 11228    | 5882 | 2.397593607 | 1.288050201 | 2.550360091 | 1.892823438 |
| TGM5      | 9333     | 2777 | 5.078374359 | 22.94927902 | 3.804190878 | 14.57896024 |
| DUSP14    | 11072    | 1508 | 9.351886999 | 5.171846131 | 8.966992525 | 4.161336042 |
| CLN8      | 2055     | 7185 | 1.962789923 | 1.860815739 | 1.970226724 | 1.408690765 |
| ZXDB      | 158586   | 5651 | 2.495601769 | 1.419567625 | 2.280723844 | 1.253762202 |
| C20orf24  | 55969    | 1251 | 11.273098   | 16.3873757  | 16.04480602 | 23.62479136 |
| SYNJ1     | 8867     | 7099 | 1.98656791  | 3.076152008 | 2.678634811 | 10.55059576 |
| HAGHL     | 84264    | 1379 | 10.22671907 | 6.625192222 | 7.814012204 | 0.880763726 |
| C10orf125 | 282969   | 768  | 18.36281979 | 16.53836332 | 18.70750491 | 9.488852951 |
| USP35     | 57558    | 4311 | 3.271316538 | 1.860815739 | 4.508976582 | 2.488687018 |
| SCARNA9   | 619383   | 353  | 39.95083738 | 45.45029264 | 55.06571684 | 55.62492835 |
| NLGN2     | 57555    | 4642 | 3.038053769 | 1.34410064  | 3.41369175  | 0.610513589 |
| LANCL2    | 55915    | 4353 | 3.239753181 | 4.248819856 | 3.883018817 | 2.929707872 |
| PPP1R3D   | 5509     | 3481 | 4.051320194 | 3.456755236 | 4.309456494 | 6.920147857 |
| BHLHE41   | 79365    | 3796 | 3.715133192 | 3.346012389 | 8.571615714 | 17.38456515 |
| ZBTB8A    | 653121   | 7333 | 1.923175453 | 1.580158135 | 1.671146347 | 1.628706248 |
| KCTD12    | 115207   | 6255 | 2.2546196   | 8.478685686 | 2.195605034 | 7.378701959 |
| PHLPP2    | 23035    | 7919 | 1.755052333 | 0.590918851 | 1.520802045 | 0.408998839 |
| DNAJB5    | 25822    | 2817 | 4.933709417 | 1.740262359 | 9.375433145 | 2.586950325 |
| ZNF408    | 79797    | 2507 | 5.543781183 | 5.24416769  | 5.056675581 | 6.055909342 |
| EEPD1     | 80820    | 4687 | 2.965278307 | 1.331195898 | 4.688204647 | 2.548176427 |
| MCM3AP    | 114044   | 2314 | 6.006162242 | 5.777856994 | 4.200129223 | 1.312200927 |
| PIGL      | 9487     | 1163 | 11.95035204 | 8.047268065 | 9.991970658 | 7.136357164 |
| RPL39L    | 116832   | 735  | 18.9091965  | 3.638084649 | 12.07341493 | 4.682028123 |
| PANX1     | 24145    | 2782 | 4.995779808 | 6.167547349 | 6.835236708 | 8.440599606 |
| AP3M2     | 10947    | 3683 | 3.773624607 | 1.875594143 | 3.040481225 | 1.044297691 |
| UBOX5     | 22888    | 4346 | 3.197942804 | 4.870939956 | 3.500345793 | 4.611241931 |
| C9orf102  | 375748   | 4666 | 2.978623966 | 2.626617587 | 2.762188265 | 2.993482971 |
| ZIC5      | 85416    | 4607 | 3.016770008 | 1.06410225  | 3.072732583 | 0.527272923 |
| ARHGEF26  | 1.01E+08 | 2598 | 5.349599471 | 7.033210219 | 6.018118684 | 6.934630024 |
| TMEM141   | 85014    | 875  | 15.88372506 | 20.88260588 | 13.76369303 | 11.33601633 |
| SOX18     | 54345    | 1718 | 8.08979012  | 0.259409412 | 2.336676639 | -           |

|           |        |      |             |             |             |             |
|-----------|--------|------|-------------|-------------|-------------|-------------|
| BZRAP1    | 9256   | 7706 | 1.803563383 | 3.932681693 | 1.754765732 | 1.812560543 |
| SNX8      | 29886  | 4745 | 2.929032545 | 1.643655209 | 2.983367547 | 2.687675104 |
| ZBTB45    | 84878  | 2393 | 5.807881081 | 6.704535437 | 5.562448795 | 4.314196411 |
| NIT1      | 4817   | 2139 | 6.497549989 | 9.792553701 | 9.087516618 | 11.6403694  |
| APOBEC3B  | 9582   | 1536 | 9.048345981 | 10.30020873 | 9.216197273 | 13.70612093 |
| COMMD1    | 150684 | 725  | 19.170013   | 15.06041593 | 22.14847154 | 12.28533789 |
| ARFGAP3   | 26286  | 2851 | 4.874871774 | 4.29877154  | 5.706393064 | 5.893228911 |
| GPR68     | 8111   | 2880 | 4.825784523 | 0.23211738  | 2.420971224 | 0.632590197 |
| C6orf70   | 55780  | 2078 | 6.688286538 | 7.720862994 | 6.914034539 | 5.942329471 |
| NR1D1     | 9572   | 2788 | 4.985028489 | 2.157992284 | 4.774368711 | 0.653464766 |
| DKFZP586I | 222161 | 2760 | 5.035601242 | 3.633141599 | 4.057279838 | 4.180596083 |
| C1orf109  | 54955  | 2376 | 5.849435786 | 4.689239999 | 6.402568526 | 1.363157326 |
| ZNF444    | 55311  | 2059 | 6.750004578 | 5.194739615 | 5.130761568 | 5.407279001 |
| ARFRP1    | 10139  | 2631 | 5.204816898 | 9.824626161 | 6.745693635 | 7.770929365 |
| C18orf21  | 83608  | 1136 | 12.0544659  | 8.434687891 | 11.90336684 | 8.196943394 |
| ORMDL2    | 29095  | 1361 | 10.0616262  | 14.08053702 | 11.64317201 | 16.36089267 |
| SRD5A1    | 6715   | 2285 | 5.992942345 | 2.828073461 | 6.102754595 | 5.581189657 |
| ZNF252    | 286101 | 5454 | 2.51079451  | 2.410547928 | 2.130667744 | 2.449634205 |
| HLA-B     | 3106   | 1578 | 8.677993193 | 31.34908493 | 13.6571899  | 166.2533627 |
| C19orf25  | 148223 | 2276 | 6.016640272 | 6.265945441 | 7.983519102 | 4.62491251  |
| SDF2      | 6388   | 1075 | 12.73848675 | 16.37561125 | 16.70623694 | 21.46687477 |
| PHLPP1    | 23239  | 6401 | 2.139333426 | 1.392486704 | 1.650404322 | 1.170109034 |
| IGSF3     | 3321   | 7253 | 1.888028851 | 0.06144566  | 1.07783485  | 0.027909674 |
| LMBR1L    | 55716  | 2358 | 5.807410203 | 8.032560731 | 6.451443095 | 20.94683739 |
| C7orf28B  | 221960 | 1854 | 7.386123656 | 5.648940767 | 7.521463997 | 4.039842465 |
| C12orf10  | 60314  | 1215 | 11.27067758 | 14.67211093 | 15.65072306 | 9.829878942 |
| ARHGAP33  | 115703 | 4242 | 3.22816437  | 2.679035107 | 1.992312696 | 0.286320881 |
| ZNF428    | 126299 | 1411 | 9.705083812 | 5.369462283 | 8.984468945 | 4.447409463 |
| FAM133B   | 257415 | 2468 | 5.548571013 | 4.785304818 | 4.879753403 | 2.132556903 |
| DUSP22    | 56940  | 1511 | 9.062788391 | 3.391893944 | 7.690709381 | 7.234386896 |
| PMS2CL    | 441194 | 1738 | 7.879098538 | 6.923455107 | 5.956820084 | 6.638921282 |
| TCTA      | 6988   | 2172 | 6.304729861 | 7.591905465 | 6.809361554 | 6.803548341 |
| C9orf91   | 203197 | 4413 | 3.103075744 | 3.989073667 | 4.02173577  | 14.31176189 |
| ALG12     | 79087  | 2387 | 5.736855157 | 5.041041046 | 6.196034058 | 4.579454797 |
| CCDC142   | 84865  | 4339 | 3.155997525 | 4.467951964 | 3.700770192 | 3.918880961 |
| IMPA2     | 3613   | 1537 | 8.909481626 | 11.59831801 | 12.09698048 | 4.741339666 |
| CCDC127   | 133957 | 1437 | 9.529487306 | 6.357787108 | 11.02738838 | 8.029537361 |
| IL17RE    | 132014 | 2790 | 4.908198301 | 0.319473383 | 2.044691239 | 0.870661776 |
| PSMG4     | 389362 | 938  | 14.599012   | 9.977582899 | 15.54226923 | 3.884562402 |
| LOC150776 | 150776 | 3798 | 3.551734358 | 3.637605701 | 4.172289916 | 3.9441116   |
| RELB      | 5971   | 2297 | 5.872654371 | 8.924948627 | 4.691128789 | 8.372112312 |
| DLEU2L    | 79469  | 1657 | 8.14090953  | 9.548051066 | 8.160666703 | 4.153639916 |
| C17orf56  | 146705 | 2308 | 5.844665117 | 6.854904947 | 7.598195491 | 4.999326338 |
| CARD6     | 84674  | 4097 | 3.292527969 | 9.68128335  | 4.692924892 | 30.88065398 |
| LOC202781 | 202781 | 2275 | 5.929444875 | 5.387163807 | 6.036707467 | 1.42367552  |
| SLC9A3    | 6550   | 2777 | 4.857575474 | 8.826645777 | 4.108526148 | 13.19395902 |
| GPR84     | 53831  | 1525 | 8.845565305 | 16.65765643 | 5.403347995 | 40.48577259 |
| NFAM1     | 150372 | 5605 | 2.406688152 | 12.7219374  | 3.769576474 | 10.90696104 |
| NANOS1    | 340719 | 4627 | 2.91538515  | 2.407960717 | 3.424758397 | 1.137486587 |
| BCL9L     | 283149 | 7740 | 1.74282779  | 5.614001747 | 2.074630732 | 11.42912314 |
| B4GALT6   | 9331   | 4814 | 2.802136911 | 1.712673314 | 2.326151299 | 0.714850575 |
| KLC2      | 64837  | 3093 | 4.361295535 | 4.250607307 | 7.719100561 | 5.301240834 |
| C8orf82   | 414919 | 1979 | 6.816314851 | 4.95433963  | 8.007254726 | 3.37551919  |
| FAM122A   | 116224 | 3646 | 3.699804468 | 3.667021691 | 3.303135326 | 3.553331659 |
| ZNF468    | 90333  | 4053 | 3.328272167 | 4.233436152 | 3.232088627 | 4.195416849 |
| B4GALT4   | 8702   | 2366 | 5.701389303 | 4.709059272 | 6.251028443 | 10.26689077 |
| PRKAR2B   | 5577   | 3678 | 3.667614761 | 0.424097007 | 2.355267867 | 0.44030204  |
| S1PR4     | 8698   | 1612 | 8.368168171 | 20.04388293 | 12.18950546 | 11.42743581 |
| ZNF816    | 125893 | 2760 | 4.887495323 | 4.198296959 | 4.057279838 | 4.840690201 |
| ZNF114    | 163071 | 2206 | 6.114908019 | 10.00019755 | 5.938193656 | 4.129328573 |
| ARHGAP27  | 201176 | 3654 | 3.691704185 | 18.78283166 | 4.741475214 | 33.90434158 |
| C16orf87  | 388272 | 1410 | 9.567012121 | 6.479531968 | 10.78900909 | 10.62392614 |

|           |        |      |             |             |             |             |
|-----------|--------|------|-------------|-------------|-------------|-------------|
| ATP5E     | 514    | 498  | 27.08732348 | 36.24387041 | 31.81999418 | 31.29924186 |
| C19orf52  | 90580  | 1414 | 9.539948438 | 8.982647122 | 7.321749156 | 6.012738504 |
| ORAOV1    | 220064 | 2544 | 5.302471341 | 5.605853704 | 5.398392095 | 4.05812579  |
| C9orf30   | 91283  | 1895 | 7.118462845 | 4.233233061 | 9.142665135 | 4.059259521 |
| TCEA3     | 6920   | 1586 | 8.505351255 | 0.421499404 | 6.927369225 | 0.127634844 |
| CDADC1    | 81602  | 3417 | 3.947757416 | 3.847564647 | 4.699339146 | 2.547392774 |
| TTC39C    | 125488 | 5253 | 2.567958708 | 1.739223315 | 3.016629945 | 2.504830781 |
| CCDC28A   | 25901  | 1504 | 8.969073864 | 6.519041309 | 8.569395241 | 10.90208637 |
| LOC147804 | 147804 | 2939 | 4.589822079 | 8.64339097  | 5.894981433 | 6.681047876 |
| ZNF765    | 91661  | 4577 | 2.94723336  | 2.921118874 | 3.27752197  | 3.626647752 |
| CMC1      | 152100 | 640  | 21.07732358 | 21.9350924  | 19.47781394 | 22.14065689 |
| DAPK3     | 1613   | 2105 | 6.408307407 | 8.045265577 | 6.825350961 | 9.520407331 |
| ALG10     | 84920  | 3143 | 4.291914442 | 4.182987082 | 4.974569628 | 1.996593939 |
| PLEKHM3   | 389072 | 9807 | 1.375495778 | 1.658691342 | 1.874352426 | 2.621440358 |
| LAGE3     | 8270   | 1816 | 7.428131658 | 6.257966367 | 8.609621333 | 4.347315889 |
| CCDC85C   | 317762 | 5671 | 2.378678732 | 1.100214278 | 2.421708603 | 0.678213436 |
| ERO1LB    | 56605  | 5070 | 2.660648341 | 1.582243915 | 2.208696716 | 2.754949022 |
| METTL1    | 4234   | 1311 | 10.28946384 | 5.269117641 | 9.508620077 | 2.933751637 |
| SPCS2     | 9789   | 2731 | 4.864555446 | 4.650846954 | 5.647670296 | 5.11446047  |
| MILR1     | 284021 | 1488 | 8.928159222 | 8.236423159 | 12.77932024 | 31.69753029 |
| WDR45     | 11152  | 1925 | 6.901351129 | 6.250890897 | 8.451390454 | 12.93441566 |
| FBXO8     | 26269  | 2564 | 5.181396616 | 3.910870052 | 5.603496011 | 5.921281093 |
| C7orf64   | 84060  | 1734 | 7.661534558 | 9.124060333 | 9.747855195 | 14.70936374 |
| CENPBD1   | 92806  | 3061 | 4.34011791  | 4.003854185 | 5.107831539 | 3.901765081 |
| GLTPD1    | 80772  | 2193 | 6.057957557 | 6.807929721 | 6.166085147 | 4.338420683 |
| GPR132    | 29933  | 3652 | 3.637760384 | 10.55587472 | 5.264762674 | 11.08591802 |
| MFSD8     | 256471 | 4562 | 2.912122079 | 3.370332145 | 3.01041418  | 3.904809281 |
| ARSA      | 410    | 4325 | 3.071699635 | 6.388728996 | 3.663897596 | 8.284371964 |
| PITPNM2   | 57605  | 6754 | 1.966997472 | 7.819269512 | 2.408783924 | 12.22845367 |
| KLHL36    | 79786  | 2211 | 6.008639042 | 6.853289264 | 7.453736493 | 7.599093453 |
| CXorf40A  | 91966  | 2085 | 6.371751042 | 6.30557717  | 5.776130167 | 3.786439163 |
| LINC00476 | 1E+08  | 8030 | 1.65443349  | 2.275501887 | 1.499779751 | 1.840262391 |
| RAPGEFL1  | 51195  | 3727 | 3.564556191 | 3.228592695 | 3.968321249 | 2.878650318 |
| S100B     | 6285   | 1135 | 11.70493473 | 19.24017895 | 15.63693388 | 45.83631522 |
| ZBTB8OS   | 339487 | 717  | 18.52873211 | 17.40394748 | 23.86898978 | 14.96336086 |
| RABGAP1L  | 9910   | 2940 | 4.51874181  | 4.09284523  | 4.455665036 | 15.56085817 |
| KLF9      | 687    | 5208 | 2.550902635 | 0.470652752 | 1.98789426  | 0.310950634 |
| MTG1      | 92170  | 1614 | 8.23116538  | 11.87336486 | 13.61438363 | 13.16916395 |
| FBXO3     | 26273  | 2408 | 5.51706849  | 6.477694324 | 5.264570466 | 3.698866267 |
| C1orf159  | 54991  | 2122 | 6.260650765 | 4.830491752 | 5.974121433 | 1.812511026 |
| MOSPD3    | 64598  | 1213 | 10.95226787 | 14.32889481 | 8.534998604 | 15.52010244 |
| FANCB     | 2187   | 3008 | 4.416589403 | 4.222560848 | 4.495420454 | 1.682420736 |
| PTX4      | 390667 | 1422 | 9.342546359 | 9.402222985 | 9.063551648 | 3.985941043 |
| C19orf12  | 83636  | 4702 | 2.781946992 | 1.990423811 | 2.741040077 | 2.410892455 |
| WDR54     | 84058  | 1223 | 10.69559669 | 6.194857957 | 9.501767682 | 3.310365707 |
| MANBAL    | 63905  | 1385 | 9.44455939  | 7.240051129 | 9.30568263  | 6.577111071 |
| ZNRD1     | 30834  | 859  | 15.22784023 | 16.60220236 | 18.93937907 | 12.96110298 |
| SOCS6     | 9306   | 5846 | 2.237549565 | 1.524684808 | 1.662521215 | 2.56239067  |
| C18orf54  | 162681 | 5023 | 2.604163797 | 1.996311131 | 2.860315304 | 1.370213287 |
| CYB5RL    | 606495 | 3551 | 3.683670728 | 1.631554436 | 3.62950449  | 1.140123137 |
| LOC28646  | 286467 | 2951 | 4.432638006 | 3.322479881 | 3.007102669 | 1.303337308 |
| CHIC2     | 26511  | 1178 | 11.10417212 | 10.59306481 | 11.1202506  | 23.02671276 |
| KIRREL3   | 84623  | 3794 | 3.447737152 | 0.528596247 | 2.338945698 | 0.106709996 |
| MED27     | 9442   | 1404 | 9.316748401 | 6.189796798 | 9.480726471 | 7.497365295 |
| ZNF248    | 57209  | 4883 | 2.678827515 | 2.144815929 | 2.250011794 | 1.036395981 |
| PRMT10    | 90826  | 2842 | 4.602644178 | 5.331675778 | 5.352745538 | 3.418925201 |
| WDR91     | 29062  | 4619 | 2.831936513 | 2.942800123 | 2.790294532 | 1.840660802 |
| EPB41L4A  | 64097  | 4707 | 2.778991875 | 1.846287382 | 2.558579009 | 0.731100631 |
| RFX2      | 5990   | 4114 | 3.179561195 | 2.329072787 | 2.97873509  | 0.984097535 |
| NEU1      | 4758   | 2088 | 6.264710132 | 16.00809517 | 15.98802313 | 66.89459552 |
| MFSD5     | 84975  | 2054 | 6.368410299 | 8.678975063 | 6.9948217   | 9.165474321 |
| LINC00294 | 283267 | 3322 | 3.937602274 | 3.55512712  | 3.943303794 | 2.985856197 |

|           |        |       |             |             |             |             |
|-----------|--------|-------|-------------|-------------|-------------|-------------|
| ATP1A3    | 478    | 3587  | 3.646700517 | 0.745467582 | 0.942446663 | 0.169302088 |
| MECR      | 51102  | 2434  | 5.374163827 | 5.218349643 | 3.993056295 | 2.162346112 |
| CELSR2    | 1952   | 10540 | 1.241054531 | 0.253699451 | 1.26289753  | 0.192057745 |
| LOC14841  | 148413 | 1766  | 7.406973247 | 7.066042098 | 6.580216237 | 5.38740462  |
| MMP25     | 64386  | 3565  | 3.6692047   | 2.437720815 | 5.393243558 | 8.744472621 |
| FBF1      | 85302  | 3862  | 3.387031267 | 2.596445058 | 2.188345535 | 0.786233284 |
| C7orf25   | 79020  | 1844  | 7.093663099 | 7.733889275 | 5.843559018 | 4.281304585 |
| FAM195A   | 84331  | 928   | 14.0955978  | 22.09117133 | 11.61155477 | 17.6688986  |
| ELMOD3    | 84173  | 2789  | 4.69010927  | 4.793818962 | 4.242361648 | 6.387142323 |
| PPARA     | 5465   | 10049 | 1.301693179 | 2.749651996 | 1.976392434 | 4.653305537 |
| VSIG10    | 54621  | 5003  | 2.573721484 | 2.18245084  | 1.604801306 | 0.728306922 |
| TM2D1     | 83941  | 1250  | 10.30106287 | 14.79609027 | 14.53639158 | 14.73682122 |
| C11orf1   | 64776  | 984   | 13.08569978 | 12.00216696 | 18.46594459 | 6.583052454 |
| ZFP161    | 7541   | 3540  | 3.637380957 | 2.706724702 | 3.163302924 | 3.145081204 |
| ZNF397    | 84307  | 2644  | 4.870018376 | 4.46676713  | 4.235284551 | 3.215587082 |
| GTPBP8    | 29083  | 1364  | 9.440123597 | 9.965391326 | 11.46266301 | 8.310862409 |
| INPP4B    | 8821   | 4140  | 3.110224296 | 3.660053759 | 0.867594431 | 0.929021352 |
| PSMC3IP   | 29893  | 1354  | 9.50984386  | 5.101782295 | 7.802243773 | 3.139590932 |
| RBM43     | 375287 | 3914  | 3.289813129 | 4.269916034 | 3.778725931 | 12.2574452  |
| ZSWIM1    | 90204  | 2787  | 4.620139428 | 6.796117045 | 5.306757551 | 6.173826104 |
| MTFP1     | 51537  | 1298  | 9.920129882 | 10.81545388 | 20.67270007 | 9.669175272 |
| ZNF48     | 197407 | 3357  | 3.835665352 | 2.323248128 | 3.713375311 | 1.025108928 |
| RG9MTD3   | 158234 | 2293  | 5.615494368 | 8.260260882 | 7.187183335 | 6.356248641 |
| FIBCD1    | 84929  | 3257  | 3.953432173 | 4.994407733 | 3.632774528 | 3.045444975 |
| KIN       | 22944  | 1906  | 6.755681315 | 5.845558362 | 5.431769836 | 7.115809978 |
| GPATCH1   | 55094  | 3390  | 3.798327017 | 3.089420703 | 4.612115735 | 2.089973511 |
| CEP89     | 84902  | 2609  | 4.935350167 | 3.501778488 | 2.996372622 | 1.241418861 |
| TMEM68    | 137695 | 2317  | 5.557327832 | 5.481857156 | 6.018469681 | 2.795737425 |
| MRPS33    | 51650  | 748   | 17.21434303 | 16.68266089 | 18.92523932 | 9.742565597 |
| TMEM218   | 219854 | 2104  | 6.119928036 | 6.1427261   | 5.924810323 | 2.597708793 |
| PELI1     | 57162  | 3780  | 3.406436134 | 3.301224959 | 4.080367084 | 17.88657149 |
| TMEM5     | 10329  | 1451  | 8.874106538 | 7.525018299 | 8.299952721 | 3.627257365 |
| CBWD2     | 150472 | 1827  | 7.047798898 | 8.659617196 | 7.863910111 | 8.309887642 |
| LOC100129 | 1E+08  | 1700  | 7.574310933 | 4.456653695 | 5.344261611 | 2.500591837 |
| LOC440335 | 440335 | 482   | 26.71437466 | -           | 17.53400509 | -           |
| CMTM4     | 146223 | 8133  | 1.58322004  | 1.369929207 | 1.065126671 | 0.622245367 |
| THAP2     | 83591  | 4840  | 2.660398468 | 1.795552625 | 1.484231795 | 1.463845083 |
| PIGP      | 51227  | 970   | 13.27456555 | 22.97244173 | 15.02953457 | 8.347581978 |
| L3MBTL3   | 84456  | 4217  | 3.053433386 | 4.015955428 | 4.008247785 | 4.704298926 |
| SLC27A3   | 11000  | 2430  | 5.298900653 | 5.777143678 | 4.521319996 | 20.49279847 |
| C1orf198  | 84886  | 3836  | 3.356707139 | 1.684605802 | 3.194607966 | 0.263854097 |
| ZBTB26    | 57684  | 1935  | 6.654433378 | 5.6427915   | 4.695216919 | 4.184575978 |
| PTPLB     | 201562 | 1187  | 10.84779156 | 7.884560033 | 13.34992174 | 3.069687897 |
| RPP38     | 10557  | 1670  | 7.710376399 | 7.739099231 | 7.338033628 | 7.27289328  |
| SURF1     | 6834   | 1037  | 12.41690317 | 21.70308694 | 16.50343845 | 13.66443627 |
| RAB6B     | 51560  | 5561  | 2.315469985 | 0.440776755 | 1.215808733 | 0.072803044 |
| HYAL2     | 8692   | 2413  | 5.336232319 | 4.06325658  | 6.391955068 | 2.936183259 |
| RAB33B    | 83452  | 3876  | 3.269334989 | 2.242124537 | 3.216150908 | 3.760288476 |
| ETV3      | 2117   | 2002  | 6.329641568 | 6.010472016 | 6.226673786 | 7.68461218  |
| APOL2     | 23780  | 2686  | 4.717774542 | 8.047196731 | 4.090397465 | 31.50233236 |
| C19orf66  | 55337  | 2139  | 5.924236755 | 4.271220231 | 6.618082754 | 92.55513229 |
| ZSWIM4    | 65249  | 4339  | 2.920475321 | 1.848807709 | 3.505992814 | 4.851947856 |
| METRNL    | 284207 | 1348  | 9.400550756 | 8.265307298 | 12.53915498 | 39.19431249 |
| MRPL54    | 116541 | 628   | 20.17825226 | 20.93491783 | 26.91525622 | 18.37332036 |
| FAS       | 355    | 2755  | 4.599616123 | 2.911788258 | 4.984939923 | 6.025105903 |
| ABHD14A   | 25864  | 1118  | 11.33447444 | 12.95538865 | 9.827198203 | 5.069774743 |
| SRRD      | 402055 | 1310  | 9.673238488 | 6.974152729 | 12.0964558  | 3.70862039  |
| ATPAF2    | 91647  | 1552  | 8.164911352 | 10.76833206 | 10.89096708 | 8.217151009 |
| C8orf38   | 137682 | 1808  | 7.008817709 | 6.162408317 | 6.544218272 | 2.463183067 |
| KIAA1456  | 57604  | 9603  | 1.319581633 | 1.809949954 | 1.232109407 | 1.075067376 |
| PGBD5     | 79605  | 3181  | 3.983634838 | 0.280204571 | 5.047985496 | 0.254547454 |
| CDK5      | 1020   | 1211  | 10.46403172 | 18.58472433 | 12.56193461 | 10.53098131 |

|          |        |       |             |             |             |             |
|----------|--------|-------|-------------|-------------|-------------|-------------|
| CAMSAP2  | 23271  | 7359  | 1.72196527  | 1.332332943 | 1.004887437 | 3.025842496 |
| C12orf62 | 84987  | 643   | 19.70753098 | 18.7137869  | 19.71552983 | 16.68542727 |
| CERS1    | 10715  | 2137  | 5.834139565 | 1.251283209 | 5.536708768 | 0.09472572  |
| JDP2     | 122953 | 4007  | 3.111444036 | 2.669320905 | 3.321921629 | 3.536316548 |
| C17orf42 | 79736  | 1357  | 9.18758751  | 7.55365033  | 11.83319224 | 6.861995354 |
| XAF1     | 54739  | 3638  | 3.427035803 | 4.655108312 | 3.484630479 | 178.3354881 |
| CXorf26  | 51260  | 1214  | 10.26981569 | 11.93090981 | 11.83473128 | 13.00613782 |
| ENTPD5   | 957    | 2064  | 6.04048268  | 5.182155459 | 4.401765862 | 8.140307958 |
| C5orf32  | 84418  | 926   | 13.46388364 | 14.19776285 | 9.126771549 | 55.7444493  |
| C9orf156 | 51531  | 1646  | 7.574457017 | 5.821266977 | 7.573390596 | 8.485778581 |
| C1orf122 | 127687 | 1359  | 9.17406641  | 11.80570515 | 7.773537946 | 21.89627877 |
| DOCK6    | 57572  | 6405  | 1.946534934 | 1.252455371 | 1.913273405 | 0.979749376 |
| SMA5     | 11042  | 1759  | 7.087865975 | 5.447302697 | 6.60640243  | 4.718353258 |
| DND1     | 373863 | 1681  | 7.416749703 | 8.616373889 | 5.907426403 | 9.75415699  |
| PRRG4    | 79056  | 2015  | 6.187372829 | 8.183433584 | 7.444773229 | 8.237799882 |
| MAPT     | 4137   | 6816  | 1.829160248 | 0.686544363 | 1.487920855 | 0.564282335 |
| LOC15221 | 152217 | 1391  | 8.963016715 | 8.650585892 | 8.354178199 | 4.074772223 |
| TRIM36   | 55521  | 4456  | 2.79792555  | 2.30033741  | 1.84921582  | 1.453708172 |
| PRUNE2   | 158471 | 12602 | 0.989331555 | 1.184715908 | 0.922128382 | 1.204742479 |
| IFIT5    | 24138  | 4034  | 3.090618803 | 5.247671059 | 2.042663781 | 50.98357084 |
| ZNF660   | 285349 | 2205  | 5.654220522 | 4.042316276 | 4.503575412 | 2.019698406 |
| RTN4IP1  | 84816  | 2636  | 4.729725437 | 5.156598547 | 3.045834951 | 2.534200485 |
| PARS2    | 25973  | 2403  | 5.188329692 | 4.08016568  | 5.715151681 | 2.948402082 |
| SESN2    | 83667  | 3547  | 3.514958063 | 3.015497284 | 3.335761668 | 6.163607894 |
| TMCC1    | 23023  | 6095  | 2.045538351 | 1.901115604 | 2.461233479 | 1.992736961 |
| CYP4V2   | 285440 | 4713  | 2.645354604 | 4.680762951 | 2.107019687 | 4.123312294 |
| TXNDC17  | 84817  | 2075  | 6.008460844 | 4.725126809 | 6.313086845 | 5.755808633 |
| PIP5K1C  | 23396  | 5082  | 2.453277499 | 1.841592436 | 3.159709143 | 2.429783676 |
| RTN4R    | 65078  | 1924  | 6.480018841 | 2.547982882 | 2.525753384 | 1.157337574 |
| MOSC2    | 54996  | 1618  | 7.705535384 | 4.407074111 | 6.529195345 | 1.000884366 |
| C21orf91 | 54149  | 5451  | 2.24971016  | 2.861546126 | 2.635729916 | 9.246888071 |
| DNASE2   | 1777   | 2011  | 6.098045789 | 2.216138088 | 8.72035564  | 11.77731326 |
| FBXO43   | 286151 | 3349  | 3.661740843 | 2.861094489 | 3.911512453 | 0.785779402 |
| C5orf41  | 153222 | 7782  | 1.575837842 | 1.746696706 | 1.35752224  | 7.725696774 |
| CAMK1    | 8536   | 1500  | 8.175446722 | 4.605208818 | 9.437386007 | 13.0903998  |
| TBC1D7   | 51256  | 1322  | 9.276225479 | 7.922190759 | 11.50718821 | 8.728022079 |
| DNAJC30  | 84277  | 2534  | 4.839451493 | 5.540039123 | 4.752656432 | 3.994255386 |
| SLC16A6  | 9120   | 3955  | 3.100675116 | 4.225651417 | 4.754574908 | 10.08305588 |
| DNAJC17  | 55192  | 1031  | 11.89444237 | 10.80662875 | 12.91070802 | 7.461005618 |
| SSH3     | 54961  | 2894  | 4.237446469 | 4.696887964 | 3.650393251 | 5.805665385 |
| SFR1     | 119392 | 1518  | 8.078504666 | 9.394790398 | 9.743039061 | 5.60079858  |
| SIK1     | 150094 | 4706  | 2.605858496 | 5.492688362 | 1.840772464 | 7.52763515  |
| FAM104B  | 90736  | 1405  | 8.728234934 | 5.868191698 | 9.022836784 | 2.017084755 |
| CRNDE    | 643911 | 1048  | 11.70149817 | 7.441931265 | 8.669126659 | 1.352101184 |
| GEMIN7   | 79760  | 1647  | 7.445762042 | 6.764805244 | 8.979923069 | 3.687228833 |
| CSF2RA   | 1438   | 1983  | 6.184150319 | 9.32683451  | 7.991102926 | 10.0040487  |
| PPP2R3B  | 28227  | 2443  | 5.019717594 | 4.651848924 | 7.61074867  | 2.817266206 |
| CLCN2    | 1181   | 3255  | 3.767486969 | 0.958420149 | 2.466611653 | 0.435330888 |
| ACPP     | 55     | 3223  | 3.804892983 | 5.323647758 | 3.998873858 | 5.21302998  |
| NMT2     | 9397   | 5004  | 2.450673478 | 1.024210981 | 2.533390424 | 1.254055706 |
| LOC10028 | 1E+08  | 1371  | 8.944690068 | 18.69129011 | 10.63358755 | 23.18113164 |
| NBPF11   | 200030 | 5467  | 2.243126044 | 2.567854242 | 1.855070156 | 1.888398026 |
| CYHR1    | 50626  | 1670  | 7.343215618 | 5.73760805  | 6.705444522 | 7.87896772  |
| HOXB9    | 3219   | 2711  | 4.523485829 | 0.821957524 | 4.520293677 | 0.074669444 |
| ZFAND2B  | 130617 | 1319  | 9.297323793 | 8.278090639 | 9.611133951 | 6.752744481 |
| TFAP2A   | 7020   | 3808  | 3.220370295 | 2.984366314 | 3.218097731 | 0.744223761 |
| TMEM106  | 113277 | 2795  | 4.387538491 | 5.182155459 | 4.611223772 | 30.56349917 |
| OASL     | 8638   | 1826  | 6.715865325 | 5.61352875  | 5.091199069 | 375.9234799 |
| C19orf60 | 55049  | 900   | 13.62574454 | 16.09347168 | 12.20756399 | 9.896522189 |
| TBC1D22B | 55633  | 3477  | 3.526939914 | 4.422046375 | 3.949815786 | 5.123307432 |
| AP4M1    | 9179   | 1886  | 6.502211072 | 5.671245423 | 4.481119011 | 3.005306555 |
| IQSEC3   | 440073 | 6976  | 1.757908555 | 0.862454485 | 1.726380648 | 0.696429574 |

|           |          |       |             |             |             |             |
|-----------|----------|-------|-------------|-------------|-------------|-------------|
| ZRSR2     | 8233     | 1512  | 8.110562224 | 12.23221748 | 8.943270322 | 17.13683496 |
| C22orf32  | 91689    | 1585  | 7.737015825 | 11.52825246 | 7.198345182 | 6.641199289 |
| HUNK      | 30811    | 7385  | 1.632875276 | 0.452605318 | 1.201619496 | 0.356340585 |
| TCTN1     | 79600    | 2040  | 5.911168586 | 4.478500036 | 4.557122304 | 1.389217687 |
| ATP9B     | 374868   | 4378  | 2.754404732 | 3.308388421 | 2.219986072 | 3.514068886 |
| FAM83G    | 644815   | 2930  | 4.115625909 | 2.205511214 | 2.884433602 | 3.868947551 |
| BTBD11    | 121551   | 5760  | 2.093538874 | 0.34817607  | 0.623583497 | -           |
| TAMM41    | 132001   | 1270  | 9.495105445 | 8.071105117 | 8.318297691 | 4.462998553 |
| ZMYM6NB   | 1.01E+08 | 925   | 13.03652315 | 13.49041118 | 13.70495749 | 18.60157119 |
| ZFP30     | 22835    | 4611  | 2.615220975 | 2.319663602 | 2.016163414 | 1.273137503 |
| ZBTB9     | 221504   | 2730  | 4.417136965 | 3.264947762 | 5.185376927 | 2.891840899 |
| ZNF264    | 9422     | 12172 | 0.990698646 | 1.409638246 | 0.972062655 | 1.480132172 |
| ZSCAN30   | 1E+08    | 4346  | 2.774685668 | 2.666198713 | 2.382179776 | 2.934426683 |
| UGT8      | 7368     | 2906  | 4.149615938 | 3.680649989 | 3.199081039 | 3.064993107 |
| MMP17     | 4326     | 2429  | 4.964505523 | 3.66953783  | 7.306677626 | 4.250256077 |
| SIRT7     | 51547    | 1749  | 6.894673479 | 15.28869192 | 9.664254379 | 14.5832114  |
| NETO2     | 81831    | 3692  | 3.266192826 | 4.707732776 | 5.207722991 | 15.51662194 |
| DPY19L2P2 | 349152   | 4361  | 2.76514192  | 2.963608281 | 2.1801913   | 3.388513413 |
| ACTA2     | 59       | 1798  | 6.706776371 | 6.816350201 | 5.523016565 | 7.318062343 |
| WDSUB1    | 151525   | 1944  | 6.203078145 | 5.502041599 | 6.086392303 | 6.039544265 |
| FAM125A   | 93343    | 1216  | 9.916763088 | 13.37729111 | 9.903973189 | 12.81827504 |
| RIT1      | 6016     | 3425  | 3.520812822 | 6.115699961 | 3.207827034 | 19.7405081  |
| ACTR5     | 79913    | 2479  | 4.86437431  | 3.056196564 | 3.323963571 | 1.224862019 |
| GRAMD1B   | 57476    | 2761  | 4.367542164 | 7.344358679 | 3.290563107 | 3.372592429 |
| KRT10     | 3858     | 2162  | 5.577605881 | 5.359528033 | 4.984053113 | 1.872607428 |
| LINC00461 | 645323   | 3562  | 3.385396944 | 2.627448837 | 3.143765399 | 1.534413054 |
| GNPTG     | 84572    | 1255  | 9.608592761 | 11.18602322 | 6.734175661 | 11.12955502 |
| ING4      | 51147    | 1461  | 8.253787758 | 8.846198299 | 7.66467649  | 14.13261056 |
| C16orf52  | 730094   | 4445  | 2.71288727  | 3.057996349 | 2.186523965 | 2.9146113   |
| EFHC1     | 114327   | 6853  | 1.759635767 | 1.105546663 | 1.202408535 | 0.531696999 |
| MAP1A     | 4130     | 10275 | 1.173604274 | 0.108434396 | 0.822519752 | 0.039402212 |
| HOXA11    | 3207     | 2653  | 4.545338829 | 1.343883511 | 3.98199701  | 1.449735543 |
| FAM57A    | 79850    | 2096  | 5.7532366   | 2.126266076 | 3.931348136 | 1.93157312  |
| H3F3AP4   | 440926   | 1059  | 11.19395443 | 10.52090107 | 11.37226761 | 9.366396869 |
| ZNF767    | 79970    | 3583  | 3.308511791 | 5.59724857  | 2.77152771  | 3.276827812 |
| PILRA     | 29992    | 1323  | 8.960240171 | 22.40116937 | 19.00444943 | 108.635293  |
| LOC64284  | 642846   | 3514  | 3.373476877 | 2.599926031 | 2.284809599 | 0.691276709 |
| TMEM120   | 83862    | 1497  | 7.91876937  | 15.77839985 | 7.480355613 | 27.45027333 |
| WRB       | 7485     | 1580  | 7.502783384 | 8.320967342 | 10.16306447 | 4.099825073 |
| PDE4DIP   | 9659     | 8380  | 1.414605936 | 1.356141637 | 1.235435955 | 2.246525567 |
| ZNF212    | 7988     | 2814  | 4.21265023  | 3.800983961 | 3.979421589 | 3.812626061 |
| RECK      | 8434     | 4427  | 2.67774966  | 3.372439548 | 2.434046268 | 2.835010053 |
| IFT88     | 8100     | 3171  | 3.73837835  | 4.07577916  | 4.930644068 | 1.787451329 |
| CABLES2   | 81928    | 3785  | 3.13194128  | 5.887257193 | 3.293474484 | 2.727575168 |
| KLHL26    | 55295    | 3122  | 3.797052449 | 3.92562385  | 2.842395893 | 2.658418764 |
| PPCDC     | 60490    | 2268  | 5.226806767 | 8.940817598 | 5.962180215 | 13.12038927 |
| EXOSC4    | 54512    | 948   | 12.50463897 | 21.86016844 | 13.37245325 | 19.64499514 |
| GPATCH3   | 63906    | 2145  | 5.526525756 | 4.882580971 | 6.698071689 | 6.228580399 |
| TMEM44    | 93109    | 2503  | 4.736075808 | 3.561049696 | 4.642693518 | 2.426234874 |
| ANKMY1    | 51281    | 3252  | 3.64526376  | 4.042782411 | 2.793740695 | 3.485859879 |
| ZNF548    | 147694   | 4565  | 2.596801259 | 2.294224794 | 2.86958493  | 2.616276652 |
| CDON      | 50937    | 8051  | 1.472413085 | 0.525875172 | 0.971001884 | 0.226289873 |
| SNRNP35   | 11066    | 967   | 12.25894286 | 17.2827832  | 12.45422068 | 17.37496962 |
| ERMAP     | 114625   | 3485  | 3.401548851 | 6.266170188 | 3.637614256 | 4.472603285 |
| NICN1     | 84276    | 3227  | 3.673504105 | 4.074102386 | 4.386761392 | 4.014703201 |
| GPATCH2   | 55105    | 2336  | 5.07465657  | 5.914223653 | 5.33638738  | 4.939402906 |
| ZNF780A   | 284323   | 4255  | 2.78599242  | 3.561133387 | 2.631749084 | 5.090455543 |
| RSC1A1    | 6248     | 1854  | 6.393957792 | 3.245136186 | 7.863348724 | 4.585767122 |
| C10orf57  | 80195    | 2100  | 5.644951308 | 7.53386696  | 5.634260303 | 3.181024989 |
| AMN1      | 196394   | 2124  | 5.581166547 | 1.888412583 | 4.675321932 | 2.573248258 |
| GTDC1     | 79712    | 2707  | 4.379164295 | 5.103666958 | 5.307485694 | 4.412006987 |
| VASH1     | 22846    | 6030  | 1.965903441 | 2.660688773 | 1.471635154 | 2.081358127 |

|           |        |       |             |             |             |             |
|-----------|--------|-------|-------------|-------------|-------------|-------------|
| ZNF500    | 26048  | 3252  | 3.64526376  | 3.289043317 | 3.638359974 | 1.929672433 |
| ZNF783    | 1E+08  | 4455  | 2.660919808 | 2.951095039 | 2.608453844 | 1.772104524 |
| IFT140    | 9742   | 5277  | 2.246427468 | 1.857994718 | 1.401358091 | 0.61376953  |
| CRIPT     | 9419   | 1918  | 6.180603622 | 8.132579735 | 7.931440468 | 8.971039286 |
| HBEGF     | 1839   | 2381  | 4.978747479 | 20.776504   | 1.686018675 | 126.2523568 |
| FARS2     | 10667  | 1841  | 6.439107956 | 3.631168138 | 6.656445496 | 3.078765977 |
| ADCY3     | 109    | 4410  | 2.688072051 | 3.132795114 | 2.970443357 | 7.941086914 |
| UBXN11    | 91544  | 1869  | 6.342641919 | 5.722829785 | 4.29578434  | 5.632049692 |
| BAI1      | 575    | 5535  | 2.141715943 | 0.925953342 | 2.595729679 | 0.146290055 |
| PITPNC1   | 26207  | 2124  | 5.484939538 | 12.27468179 | 11.04171775 | 36.88322503 |
| LOC729513 | 729513 | 1891  | 6.160767625 | 4.949218804 | 5.139661038 | 3.639651687 |
| LOC550117 | 550112 | 2301  | 5.063021112 | 4.938925216 | 4.866619884 | 5.542380863 |
| SCAMP5    | 192683 | 3516  | 3.313427639 | 3.168837951 | 2.463787035 | 10.42082599 |
| WDR53     | 348793 | 1584  | 7.354805289 | 4.360993199 | 5.735634305 | 3.450491982 |
| CTSL1     | 1514   | 1730  | 6.734110739 | 8.758741366 | 8.67122431  | 73.83388007 |
| TOM1L2    | 146691 | 5825  | 2.000001988 | 3.022108514 | 2.031235474 | 3.023401043 |
| NUDT13    | 25961  | 2120  | 5.49528848  | 4.729939063 | 5.381781657 | 3.341985945 |
| SENP3     | 26168  | 2509  | 4.643288792 | 3.374907142 | 5.052644752 | 2.017027331 |
| MT1X      | 4501   | 468   | 24.89318713 | 8.094349659 | 31.60242157 | 21.19447497 |
| SLC22A4   | 6583   | 2214  | 5.261974516 | 5.938179042 | 2.576643431 | 5.394445761 |
| TRDMT1    | 1787   | 7687  | 1.515547233 | 0.753694524 | 1.374299215 | 0.553012374 |
| NBPF3     | 84224  | 3783  | 3.079569542 | 2.002725689 | 3.574471247 | 1.123712959 |
| FLYWCH2   | 114984 | 1044  | 11.15901492 | 10.67206345 | 13.35708261 | 8.337587267 |
| PACSIN3   | 29763  | 2046  | 5.694042805 | 0.653468284 | 7.022171932 | 0.197877676 |
| PPP3CC    | 5533   | 2221  | 5.245390175 | 6.421112933 | 7.610437149 | 6.015445725 |
| SLC15A2   | 6565   | 5523  | 2.109362951 | 4.478440704 | 1.759749959 | 3.335329808 |
| S100P     | 6286   | 510   | 22.84315996 | 49.80965894 | 18.64277306 | 55.96562682 |
| MRM1      | 79922  | 1851  | 6.293901447 | 6.621176478 | 6.163899035 | 2.515323527 |
| PTPLAD2   | 401494 | 1416  | 8.227409307 | 17.46781639 | 5.520858877 | 21.87261019 |
| PWWP2B    | 170394 | 2626  | 4.436409588 | 5.345947882 | 4.827526916 | 3.237628425 |
| ZNF45     | 7596   | 3903  | 2.98488639  | 3.140096762 | 3.031500547 | 3.371221136 |
| LOC100130 | 1E+08  | 5223  | 2.230521076 | 2.389169126 | 1.294488295 | 0.968930035 |
| CD38      | 952    | 1494  | 7.797865849 | 128.1213361 | 11.03093132 | 141.4563139 |
| PGBD1     | 84547  | 3155  | 3.692555175 | 2.471994918 | 2.678729146 | 1.475709619 |
| CERKL     | 375298 | 3304  | 3.52603256  | 2.495402341 | 3.772942167 | 2.511980442 |
| CITED4    | 163732 | 1312  | 8.879581996 | 1.019051912 | 6.441608578 | 1.697193211 |
| PAX3      | 5077   | 3359  | 3.468297582 | 7.628984443 | 1.94993379  | 15.06615533 |
| P2RX7     | 5027   | 3903  | 2.98488639  | 0.399648679 | 3.139768424 | 3.423086076 |
| PPAPDC1B  | 84513  | 2151  | 5.416090924 | 6.008505679 | 5.598898837 | 6.211206395 |
| C9orf46   | 55848  | 1020  | 11.42157998 | 12.67087815 | 10.77137999 | 11.90758017 |
| CD37      | 951    | 1263  | 9.224078843 | 36.16840885 | 23.42032192 | 122.6113065 |
| ZNF81     | 347344 | 7859  | 1.482378366 | 1.899706054 | 2.043216931 | 2.137879581 |
| C9orf89   | 84270  | 922   | 12.6355874  | 12.08420199 | 11.22879968 | 38.42196423 |
| LIN52     | 91750  | 1798  | 6.479428019 | 5.453080161 | 6.22808251  | 4.616008555 |
| LOC155060 | 155060 | 3154  | 3.693725928 | 4.30969999  | 4.756251762 | 3.080718269 |
| INPP1     | 3628   | 2179  | 5.346494529 | 10.02184631 | 4.55731243  | 11.51958651 |
| C10orf11  | 83938  | 896   | 13.00224507 | 21.88535297 | 13.67691536 | 18.07400562 |
| AKTIP     | 64400  | 2222  | 5.243029513 | 3.409681045 | 4.183856661 | 5.192819617 |
| ZSCAN2    | 54993  | 3765  | 3.094292584 | 2.663338861 | 4.040505397 | 1.559213021 |
| KLHL22    | 84861  | 2637  | 4.417903519 | 7.689713429 | 3.765788314 | 5.83412726  |
| TIMM22    | 29928  | 1691  | 6.768554353 | 7.90654115  | 9.121104423 | 3.830705863 |
| OBSCN     | 84033  | 24030 | 0.476305677 | 0.064911727 | 0.466004675 | 0.101088071 |
| PXMP2     | 5827   | 977   | 11.71507207 | 11.17584601 | 11.0291943  | 3.729497987 |
| ZDHHC23   | 254887 | 3778  | 3.029546165 | 3.538899175 | 2.964026562 | 2.303981235 |
| C5orf28   | 64417  | 2761  | 4.145463749 | 3.389704005 | 4.285384511 | 2.566102935 |
| PLEKHG4   | 25894  | 6818  | 1.678736493 | 1.601466933 | 1.332538096 | 0.890710749 |
| DHX58     | 79132  | 2631  | 4.350294721 | 2.540851593 | 2.489482175 | 44.70207882 |
| PIGV      | 55650  | 2750  | 4.162045604 | 4.780773964 | 4.686680161 | 4.931903207 |
| SIRT6     | 51548  | 1657  | 6.907438389 | 6.992938809 | 6.375520862 | 5.986128114 |
| ZNF577    | 84765  | 3096  | 3.696907432 | 2.447128967 | 3.070999438 | 1.438447993 |
| PIGQ      | 9091   | 2921  | 3.918392814 | 5.721482833 | 5.352643732 | 3.11855489  |
| PLCD3     | 113026 | 3477  | 3.291810587 | 2.114891745 | 4.07134858  | 2.969189534 |



|           |        |      |             |             |             |             |
|-----------|--------|------|-------------|-------------|-------------|-------------|
| PIN4      | 5303   | 1605 | 7.131230785 | 7.080664749 | 10.39968607 | 5.423327793 |
| FAM72A    | 729533 | 1881 | 6.084861994 | 2.606230231 | 4.380704781 | 1.614265255 |
| DNAJB9    | 4189   | 2538 | 4.509702683 | 2.897351693 | 3.24669255  | 4.785552316 |
| SOBP      | 55084  | 6248 | 1.831886269 | 1.319591763 | 1.454104472 | 0.518383772 |
| GLIS2     | 84662  | 3705 | 3.089237628 | 1.98474456  | 2.22405012  | 0.546366702 |
| TTC26     | 79989  | 2151 | 5.321071785 | 3.833012243 | 5.598898837 | 1.223419441 |
| LOC440104 | 440104 | 3459 | 3.308940564 | 3.543162088 | 3.726039446 | 2.399416994 |
| ATP1B1    | 481    | 2212 | 5.174333368 | 0.60442862  | 4.489323591 | 1.189681383 |
| SLC22A23  | 63027  | 6159 | 1.858357755 | 0.542700158 | 1.063456341 | 0.230070148 |
| FBXO46    | 23403  | 2990 | 3.827968365 | 4.471558891 | 3.533189989 | 3.655905886 |
| ZNF250    | 58500  | 6382 | 1.793422972 | 1.047474231 | 1.42357329  | 1.046717718 |
| PIM1      | 5292   | 2751 | 4.160532683 | 20.08815188 | 4.070553381 | 35.76169662 |
| ARSK      | 153642 | 3345 | 3.421711632 | 1.332332943 | 3.410875071 | 1.331370698 |
| BANP      | 54971  | 2456 | 4.660270933 | 4.536496025 | 4.731539851 | 5.192597055 |
| CTNS      | 1497   | 4431 | 2.583079533 | 1.91100023  | 2.956365426 | 4.705523106 |
| TRAF3IP1  | 26146  | 4183 | 2.7362241   | 1.544859636 | 2.727558478 | 1.596976447 |
| TTC18     | 118491 | 3714 | 3.081751591 | 3.719877882 | 4.551098791 | 4.687367317 |
| TMEM194   | 1E+08  | 3637 | 3.146996264 | 3.492291182 | 2.962750297 | 2.393302477 |
| ZNF219    | 51222  | 3098 | 3.694520791 | 2.445549155 | 3.614619868 | 3.463114828 |
| ZNF611    | 81856  | 4559 | 2.510556133 | 2.590509386 | 2.734327905 | 4.129388957 |
| RETN      | 56729  | 478  | 23.94482303 | 72.25746053 | 12.81853155 | 52.93641814 |
| NSMCE2    | 286053 | 1225 | 9.343367682 | 7.821881995 | 10.17616402 | 6.444674004 |
| C10orf32  | 119032 | 2450 | 4.671683841 | 6.093791787 | 6.467900858 | 8.345026595 |
| ZNF385A   | 25946  | 2421 | 4.727643705 | 22.27406432 | 16.31980602 | 92.89486441 |
| TMEM116   | 89894  | 1607 | 7.122355576 | 5.823878506 | 6.836843554 | 8.943652315 |
| NTSR1     | 4923   | 4158 | 2.752675664 | 8.681792912 | 1.981747401 | 4.040787789 |
| ZNF581    | 51545  | 1258 | 9.098271391 | 6.199637493 | 6.886069329 | 7.723835788 |
| OXSM      | 54995  | 1537 | 7.446730911 | 8.408780556 | 7.973009863 | 6.84860174  |
| NBEAL1    | 65065  | 9058 | 1.263593002 | 0.713418841 | 1.306242729 | 1.117403748 |
| GCHFR     | 2644   | 713  | 16.05277056 | 29.69018941 | 18.37258794 | 36.34066544 |
| MYO1C     | 4641   | 4973 | 2.301553471 | 0.806553052 | 1.784427906 | 0.488466993 |
| MLYCD     | 23417  | 2211 | 5.176673637 | 5.643885276 | 5.638082732 | 4.394656455 |
| HACL1     | 26061  | 2037 | 5.518526874 | 3.609955128 | 4.875004312 | 3.378783181 |
| ZNF641    | 121274 | 4544 | 2.47386427  | 1.863477557 | 2.836349129 | 3.964825881 |
| P2RY6     | 5031   | 2400 | 4.683849684 | 6.406439686 | 4.225695227 | 23.27931924 |
| IQCK      | 124152 | 2603 | 4.318570589 | 1.198485435 | 2.678600509 | 0.23330257  |
| UNC5C     | 8633   | 9879 | 1.137892423 | 0.383455374 | 0.834103218 | 0.163926602 |
| S1PR2     | 9294   | 3589 | 3.132136874 | 1.73845505  | 4.709607386 | 6.824712292 |
| HEXDC     | 284004 | 2272 | 4.94772854  | 9.513543319 | 5.393713098 | 16.57208121 |
| LOC284454 | 284454 | 1774 | 6.336662482 | 5.903684432 | 10.242666   | 3.879696359 |
| THTPA     | 79178  | 2200 | 5.109654201 | 6.786268126 | 4.225695227 | 11.3176137  |
| DNM1      | 1759   | 3253 | 3.45565301  | 1.986519477 | 2.403177427 | 4.10707192  |
| SLC4A5    | 57835  | 6364 | 1.766379516 | 1.295538865 | 1.659999696 | 0.827019239 |
| MKS1      | 54903  | 2408 | 4.668288722 | 4.349309046 | 6.4052274   | 2.690084558 |
| C16orf74  | 404550 | 899  | 12.50415934 | 8.675354801 | 10.81101115 | 0.675513447 |
| REC8      | 9985   | 2354 | 4.775377758 | 5.774338899 | 4.757048578 | 13.67297757 |
| LOC650621 | 650623 | 5923 | 1.897896208 | 3.4235648   | 2.175986906 | 2.15313496  |
| NAPRT1    | 93100  | 1715 | 6.55465845  | 7.665964081 | 5.174320686 | 5.075475864 |
| LPAR6     | 10161  | 3043 | 3.694130543 | 6.151148708 | 4.652014134 | 17.76158607 |
| PRKAR1B   | 5575   | 2554 | 4.401424919 | 6.107395431 | 5.625436089 | 1.8229694   |
| REL       | 5966   | 2592 | 4.336897856 | 7.995154198 | 5.869021149 | 19.99297412 |
| ZNF584    | 201514 | 2293 | 4.902415718 | 4.47025883  | 4.883598932 | 0.441406156 |
| DYNLT1    | 6993   | 774  | 14.52356491 | 22.45600699 | 16.6516414  | 137.3063993 |
| PSMB9     | 5698   | 1048 | 10.72637332 | 40.82430865 | 8.669126659 | 151.8216472 |
| SERPINE1  | 5054   | 3198 | 3.515084191 | 2.508435476 | 3.501592355 | 35.89029559 |
| SYNJ2BP   | 55333  | 7074 | 1.589092344 | 1.575011908 | 1.403786229 | 1.860033375 |
| PHACTR1   | 221692 | 2150 | 5.228483369 | 4.249367476 | 5.896318922 | 6.967319004 |
| ZNF696    | 79943  | 4686 | 2.398898686 | 2.567854242 | 2.028982984 | 2.678316155 |
| GNG2      | 54331  | 3875 | 2.900964966 | 99.88654797 | 5.61608527  | 77.73268337 |
| ANKRD36B  | 84832  | 1879 | 5.982564791 | 6.048146313 | 5.622266135 | 7.325791741 |
| SLC40A1   | 30061  | 3381 | 3.32482675  | 3.888532505 | 2.374688238 | 3.532476461 |
| BLZF1     | 8548   | 2344 | 4.79575053  | 7.985471637 | 7.120945455 | 48.70728614 |

|           |        |       |             |             |             |             |
|-----------|--------|-------|-------------|-------------|-------------|-------------|
| TMEM60    | 85025  | 882   | 12.74516921 | 13.39017267 | 15.33132055 | 27.31183072 |
| ZNF226    | 7769   | 2623  | 4.285642105 | 6.626362718 | 3.785887832 | 6.173964558 |
| LOC91948  | 91948  | 1517  | 7.410177483 | 6.022504993 | 4.039062676 | 7.872974894 |
| LOC100129 | 1E+08  | 2502  | 4.492901376 | 4.274967573 | 3.631192941 | 4.854409184 |
| HEATR7A   | 727957 | 5363  | 2.096072952 | 5.110650797 | 2.718375636 | 5.284363381 |
| ZNF789    | 285989 | 1654  | 6.672825317 | 7.005622495 | 8.941918558 | 6.853697899 |
| FUZ       | 80199  | 1762  | 6.263821268 | 4.299836141 | 6.23541861  | 2.642374488 |
| FSD1L     | 83856  | 4310  | 2.560754774 | 1.912948802 | 2.156967401 | 0.986312325 |
| SIRT3     | 23410  | 2919  | 3.78103908  | 4.732999813 | 4.198189845 | 2.219158484 |
| KIF27     | 55582  | 4653  | 2.371986476 | 1.867714314 | 1.907148072 | 0.957110463 |
| CRYBB2P1  | 1416   | 1516  | 7.280246091 | 8.231286508 | 7.665344245 | 6.676413686 |
| FAHD2A    | 51011  | 1313  | 8.405828693 | 6.279367354 | 7.563125502 | 1.541727821 |
| NAPB      | 63908  | 3871  | 2.851163285 | 3.223619309 | 2.67449065  | 3.137621229 |
| CDH24     | 64403  | 3567  | 3.094155614 | 1.374353536 | 6.989515515 | 2.951023514 |
| SOCS2     | 8835   | 2210  | 4.994051165 | 6.150585416 | 4.206574434 | 2.015128952 |
| NOMO3     | 408050 | 4336  | 2.545399694 | 2.672347695 | 2.485129804 | 3.17462239  |
| ZNF736    | 728927 | 2098  | 5.260654468 | 4.673326086 | 3.625477316 | 3.762976957 |
| BRI3      | 25798  | 809   | 13.64258724 | 31.12496091 | 15.1477332  | 152.3846447 |
| FAM86EP   | 348926 | 3428  | 3.21961875  | 2.405136912 | 2.280494799 | 0.767670717 |
| C17orf51  | 339263 | 7912  | 1.394951096 | 0.422458325 | 1.388625833 | 0.204680347 |
| IKZF4     | 64375  | 5506  | 2.004513817 | 1.861660643 | 1.458194866 | 0.95589365  |
| RAPGEF3   | 10411  | 6239  | 1.769009949 | 2.78585501  | 2.099640199 | 3.666366648 |
| TMEM140   | 55281  | 2072  | 5.326666542 | 7.743220705 | 7.036027285 | 29.79768494 |
| CLYBL     | 171425 | 5779  | 1.90982057  | 2.082188091 | 1.645235207 | 1.366105841 |
| BLOC1S3   | 388552 | 2617  | 4.217368389 | 5.279184736 | 3.390890324 | 8.121906997 |
| DET1      | 55070  | 2343  | 4.710564692 | 6.752505598 | 3.697257881 | 3.023905337 |
| ZBTB47    | 92999  | 5524  | 1.997982092 | 5.324749165 | 1.988922446 | 5.789963857 |
| C20orf7   | 79133  | 2409  | 4.581508126 | 2.867502377 | 4.29761449  | 2.268816646 |
| CDC14B    | 8555   | 5589  | 1.974745585 | 1.4353152   | 4.46083411  | 1.810957801 |
| GORAB     | 92344  | 2587  | 4.266274864 | 6.546302296 | 3.266869136 | 5.790388813 |
| ZNF513    | 130557 | 2168  | 5.090799389 | 7.29756486  | 5.360083891 | 8.496783454 |
| CES3      | 23491  | 3912  | 2.821281461 | 3.816408455 | 2.916507442 | 2.846009065 |
| HRH1      | 3269   | 4578  | 2.410846019 | 1.168192318 | 1.661479119 | 4.819734832 |
| FIZ1      | 84922  | 2679  | 4.119765985 | 2.91121462  | 2.28714374  | 0.906736228 |
| PUS10     | 150962 | 3820  | 2.889228553 | 3.033324504 | 2.54426676  | 4.663282707 |
| SIX5      | 147912 | 3352  | 3.292617266 | 0.997162969 | 2.584330315 | 0.241561889 |
| ZC3H12A   | 80149  | 2737  | 4.032463673 | 10.90960166 | 5.017723598 | 25.4422831  |
| BDH2      | 56898  | 2936  | 3.759146142 | 2.428694112 | 3.238356356 | 2.964727898 |
| EP400NL   | 347918 | 1539  | 7.171444493 | 7.673900124 | 7.413500399 | 8.286561641 |
| GDPD5     | 81544  | 3193  | 3.45657785  | 3.838333123 | 3.44090435  | 8.305098981 |
| SPEG      | 10290  | 10650 | 1.036324232 | 0.146462797 | 0.7538799   | 0.095037025 |
| EPB41L4A  | 114915 | 1194  | 9.24359554  | 10.82436827 | 9.201681399 | 5.255690747 |
| CST3      | 1471   | 818   | 13.49248542 | 20.70328122 | 23.24648964 | 28.21135743 |
| LPHN1     | 22859  | 7874  | 1.401683144 | 0.962193457 | 1.073328734 | 0.719838476 |
| TMEM158   | 25907  | 1876  | 5.883183942 | 4.751229952 | 3.37875418  | 18.66748043 |
| NME7      | 29922  | 1646  | 6.705257032 | 4.332105657 | 6.289765071 | 9.469636967 |
| PPFIA3    | 8541   | 4733  | 2.331893741 | 1.177016083 | 2.365960776 | 1.668017252 |
| MSRA      | 4482   | 1716  | 6.431732561 | 9.99890252  | 4.555673759 | 5.898276893 |
| SLC24A1   | 9187   | 5768  | 1.913462738 | 2.627015007 | 1.941416843 | 2.983088306 |
| SPC24     | 147841 | 654   | 16.87592213 | 12.6067421  | 17.44553075 | 5.571436595 |
| USP18     | 11274  | 2037  | 5.31785317  | 2.297244173 | 2.904257888 | 168.7404071 |
| CBX8      | 57332  | 1561  | 6.939440683 | 5.852748286 | 7.30901801  | 4.149726851 |
| ANO8      | 57719  | 4162  | 2.602707089 | 1.659734077 | 2.436729588 | 2.042770842 |
| ZFP36     | 7538   | 1745  | 6.207717425 | 7.661868816 | 16.58797267 | 35.03353388 |
| HMGCL     | 3155   | 1617  | 6.699113733 | 8.681792912 | 5.618580543 | 13.14473136 |
| CCDC84    | 338657 | 1202  | 9.012035696 | 9.269246453 | 6.503773852 | 6.736401429 |
| SLC17A5   | 26503  | 3333  | 3.250065078 | 3.677107009 | 2.789237774 | 9.717557178 |
| MAR3      | 115123 | 4158  | 2.605210896 | 2.304426514 | 1.880119329 | 1.655262468 |
| PBX3      | 5090   | 2911  | 3.721218449 | 3.827425021 | 4.354890306 | 3.337885751 |
| DYNC2H1   | 79659  | 13699 | 0.790748734 | 1.447704865 | 0.508971248 | 0.354645792 |
| KLHDC7B   | 113730 | 3008  | 3.601219051 | 2.074240416 | 5.127588956 | 33.44652423 |
| AGFG2     | 3268   | 4821  | 2.246933604 | 1.479080255 | 1.840688649 | 1.46961423  |

|          |          |       |             |             |             |             |
|----------|----------|-------|-------------|-------------|-------------|-------------|
| RAB15    | 376267   | 3411  | 3.175745209 | 0.457293695 | 4.274010124 | 1.127572089 |
| TNS1     | 7145     | 10276 | 1.054152093 | 0.845705985 | 2.385075157 | 5.338480134 |
| DNAJC27  | 51277    | 5008  | 2.163032529 | 1.779813776 | 1.603199068 | 2.06147604  |
| HSD17B1  | 3292     | 2248  | 4.818713037 | 6.046616445 | 3.477551677 | 5.402905595 |
| FOSB     | 2354     | 3776  | 2.868767719 | 1.534335223 | 7.1621953   | 1.340233468 |
| KCNJ14   | 3770     | 3120  | 3.471944521 | 2.856829292 | 3.792290589 | 1.622026145 |
| ZNF304   | 57343    | 4417  | 2.406176305 | 1.816159532 | 2.4395569   | 1.558202703 |
| ZBTB46   | 140685   | 5233  | 2.030972814 | 2.171692513 | 2.301400993 | 2.669136546 |
| TMEM62   | 80021    | 2814  | 3.776858827 | 4.909604284 | 5.180756409 | 17.9840852  |
| CCDC57   | 284001   | 2997  | 3.546239819 | 4.907226291 | 3.806932637 | 6.349120159 |
| RHOF     | 54509    | 2451  | 4.336222251 | 4.363920387 | 4.482581636 | 2.477709461 |
| FBXL6    | 26233    | 1799  | 5.907771394 | 2.477294994 | 5.637392188 | 1.350275906 |
| LIMK2    | 3985     | 3848  | 2.761975244 | 5.443417974 | 3.514091665 | 8.890456819 |
| BRMS1L   | 84312    | 2604  | 4.081444216 | 2.823916512 | 3.407818732 | 1.63249083  |
| C12orf45 | 121053   | 622   | 17.08694652 | 8.956297618 | 12.22870001 | 9.112553316 |
| FKBP1AP1 | 2282     | 1662  | 6.394753753 | 6.837826066 | 5.339326099 | 5.237329186 |
| P2RX1    | 5023     | 2910  | 3.652261422 | 11.71594528 | 5.227664199 | 10.57360384 |
| TTC5     | 91875    | 1881  | 5.650228994 | 5.923250525 | 5.616288181 | 2.798059775 |
| PHF7     | 51533    | 2290  | 4.641083292 | 1.946136985 | 3.598299429 | 0.26519065  |
| TRAF3IP2 | 643749   | 4943  | 2.150127602 | 1.262252716 | 2.222700302 | 0.696194754 |
| ZNF234   | 10780    | 4600  | 2.310452334 | 2.131443071 | 2.434367903 | 2.156307453 |
| PTRHD1   | 391356   | 602   | 17.65461917 | 15.54646638 | 21.05828186 | 10.76033823 |
| RG9MTD2  | 93587    | 3722  | 2.855475749 | 3.412537085 | 2.724790044 | 1.142129533 |
| AGA      | 175      | 2113  | 5.029853639 | 6.643851935 | 5.199624984 | 4.406875389 |
| ZNF569   | 148266   | 4071  | 2.610680604 | 1.258941722 | 2.075998638 | 0.348072228 |
| PAIP2B   | 400961   | 6300  | 1.686996943 | 0.707405348 | 1.140266966 | 0.739026008 |
| GSDMD    | 79792    | 2326  | 4.569252252 | 9.005276168 | 2.63424681  | 8.963960827 |
| ZNF776   | 284309   | 5292  | 2.008329694 | 2.694877518 | 2.954473231 | 2.830637917 |
| ZNF586   | 54807    | 2285  | 4.651238835 | 5.656146921 | 3.698639149 | 4.606696225 |
| SPINT1   | 6692     | 2484  | 4.278615434 | 6.997161598 | 10.63228469 | 13.77233407 |
| C3       | 718      | 5101  | 2.083528865 | 6.639985901 | 2.029592885 | 90.956078   |
| SLC16A5  | 9121     | 1940  | 5.478392133 | 6.776870309 | 4.02965782  | 6.886755131 |
| FAM118B  | 79607    | 2100  | 5.060990828 | 3.395545672 | 6.539766423 | 5.205313619 |
| DYNC2LI1 | 51626    | 1412  | 7.526969361 | 9.31099745  | 10.77372721 | 4.587622956 |
| BLOC1S1  | 2647     | 853   | 12.45964917 | 24.81723922 | 16.10024559 | 17.32392379 |
| MAR2     | 51257    | 1705  | 6.233478439 | 13.46144664 | 6.939558144 | 32.05618358 |
| PLAG1    | 5324     | 7338  | 1.448362052 | 2.520456914 | 1.900353536 | 4.02761161  |
| RILPL1   | 353116   | 2624  | 4.050335647 | 0.764288934 | 2.89872386  | 1.774338357 |
| LOC10050 | 1.01E+08 | 4607  | 2.262577506 | 2.998833613 | 1.972052255 | 2.109091691 |
| UROC1    | 131669   | 3460  | 3.012628489 | 0.966037651 | 2.076208638 | 0.058505452 |
| ZNF134   | 7693     | 2248  | 4.636874809 | 5.550992147 | 4.041478976 | 4.592469756 |
| LOC73010 | 730101   | 3784  | 2.754676155 | 1.648867646 | 1.78676331  | 0.267479999 |
| SEMA4C   | 54910    | 3585  | 2.907585654 | 2.672749078 | 1.768073317 | 3.387930761 |
| C17orf75 | 64149    | 1631  | 6.390983795 | 4.371947217 | 5.829438542 | 2.854606896 |
| C10orf91 | 170393   | 738   | 14.12424739 | 13.88930013 | 19.18167888 | 6.583052454 |
| PPM1H    | 57460    | 6201  | 1.680969936 | 2.659187014 | 4.15686839  | 2.219829492 |
| TM7SF2   | 7108     | 1599  | 6.518883409 | 8.500809111 | 8.192404756 | 4.684095015 |
| KIF17    | 57576    | 3810  | 2.73587784  | 5.380736744 | 5.323710522 | 13.4421266  |
| PTPRG    | 5793     | 6648  | 1.56794443  | 1.005562657 | 1.779775366 | 1.339781885 |
| MEX3D    | 399664   | 2863  | 3.640829399 | 1.712301455 | 2.804338432 | 1.272692816 |
| SIRPB2   | 284759   | 2833  | 3.679383893 | 3.696835928 | 3.206934253 | 3.715602144 |
| IFI35    | 3430     | 1260  | 8.272773468 | 16.97772836 | 6.707452742 | 193.1107089 |
| RHBDD3   | 25807    | 1738  | 5.997522768 | 5.384909528 | 6.443091112 | 5.241253644 |
| ALKBH4   | 54784    | 2138  | 4.875441801 | 3.543644191 | 5.237648434 | 2.745761004 |
| PMS2P1   | 5379     | 1518  | 6.866728966 | 5.578156799 | 7.516058705 | 2.667046943 |
| C3orf64  | 285203   | 4152  | 2.51052374  | 3.27379426  | 2.391710931 | 6.338090603 |
| PPAN     | 56342    | 1745  | 5.973463937 | 5.746401612 | 6.175084716 | 1.972086344 |
| MYOF     | 26509    | 6860  | 1.519489004 | 4.547605811 | 0.954785365 | 18.11826849 |
| CCZ1     | 51622    | 1834  | 5.683584826 | 4.860036745 | 4.953786662 | 3.200892599 |
| ARL15    | 54622    | 2501  | 4.167810704 | 5.078553791 | 3.125764162 | 5.989498544 |
| TNFRSF21 | 27242    | 3662  | 2.846448545 | 0.365099975 | 2.65404124  | 0.276391129 |
| TEF      | 7008     | 4382  | 2.378752754 | 0.762777333 | 1.784010993 | 0.184782166 |

|          |          |      |             |             |             |             |
|----------|----------|------|-------------|-------------|-------------|-------------|
| PGM2L1   | 283209   | 8519 | 1.223581943 | 1.098599925 | 2.008928944 | 0.974243853 |
| PTCD2    | 79810    | 2103 | 4.956583248 | 5.615849877 | 5.324818047 | 1.155086237 |
| RAD54B   | 25788    | 3097 | 3.365739286 | 2.590241088 | 3.956898986 | 0.784354651 |
| FZD5     | 7855     | 6584 | 1.583185688 | 0.846114386 | 0.930628505 | 0.860876088 |
| CHRM5    | 1133     | 3055 | 3.412011316 | 1.458806447 | 2.973893531 | 8.150163713 |
| LOC10050 | 1.01E+08 | 1644 | 6.340446819 | 7.183778766 | 8.096678811 | 5.417804118 |
| KSR1     | 8844     | 4552 | 2.289915327 | 11.25912071 | 3.29552242  | 14.05261878 |
| SKIL     | 6498     | 3526 | 2.956237825 | 7.583642135 | 3.655238356 | 19.06023327 |
| C12orf66 | 144577   | 2620 | 3.90049939  | 2.381418005 | 2.338648122 | 0.927155098 |
| ADRB2    | 154      | 2058 | 4.965650341 | 0.97448696  | 1.847971674 | 1.868876772 |
| PHYH     | 5264     | 1725 | 5.924236755 | 3.358637567 | 6.369163821 | 4.576652554 |
| CHAC2    | 494143   | 1305 | 7.830887664 | 5.634849499 | 9.066625775 | 1.551179026 |
| HELB     | 92797    | 3368 | 3.034236461 | 2.514145493 | 2.509320206 | 3.846629225 |
| TTLL3    | 26140    | 4160 | 2.45656452  | 5.570817119 | 2.895007547 | 5.887954908 |
| MICA     | 1.01E+08 | 2197 | 4.651483114 | 5.0712946   | 3.846786734 | 7.371101063 |
| UBXN8    | 7993     | 1442 | 7.086899031 | 7.262923844 | 7.326101295 | 4.632560664 |
| ASTE1    | 28990    | 2662 | 3.838958829 | 2.929806148 | 3.095456684 | 1.520878009 |
| PMAIP1   | 5366     | 1954 | 5.229942887 | 4.903687535 | 5.514597149 | 16.05756078 |
| EFCAB4A  | 283229   | 1838 | 5.560015453 | 5.576878943 | 8.736475443 | 3.414197362 |
| DNAJC25  | 548645   | 2516 | 4.0617283   | 3.454083746 | 5.206540224 | 2.494155307 |
| BNIP1    | 662      | 1388 | 7.362614123 | 6.742775763 | 9.133347033 | 2.771000285 |
| CREB3    | 10488    | 1868 | 5.470721843 | 7.873103422 | 4.411191485 | 11.16176279 |
| SEC22A   | 26984    | 3429 | 2.980259085 | 3.184252421 | 3.265702057 | 3.010752992 |
| ZNF133   | 7692     | 2718 | 3.759863283 | 3.525314733 | 3.264885937 | 2.606699854 |
| SLFN12   | 55106    | 2405 | 4.249192683 | 4.540042226 | 5.271137498 | 16.74983107 |
| TRIM9    | 114088   | 4946 | 2.066176385 | 0.8560091   | 1.196112681 | 1.800822881 |
| PJA1     | 64219    | 2880 | 3.548370973 | 1.31533182  | 2.934510574 | 1.405755993 |
| ANKRD42  | 338699   | 2562 | 3.988801094 | 3.913923034 | 5.525401644 | 3.871590275 |
| ATPBD4   | 89978    | 2380 | 4.29382706  | 4.587731745 | 4.61630571  | 1.87119117  |
| RASGRP3  | 25780    | 4798 | 2.129910046 | 2.647241148 | 1.58529625  | 49.44698361 |
| ARHGAP12 | 94134    | 4172 | 2.449498658 | 10.73570701 | 3.08925466  | 17.56453701 |
| DUXA     | 503835   | 3346 | 3.054186612 | 2.597272775 | 3.15727378  | 1.996459198 |
| ZNF551   | 90233    | 3711 | 2.753788306 | 3.122419727 | 2.163519518 | 1.36370832  |
| FAM173B  | 134145   | 1865 | 5.479521931 | 9.439025252 | 9.856179216 | 2.387900796 |
| KCTD1    | 284252   | 3438 | 2.97245736  | 1.944438785 | 2.458228753 | 2.708472279 |
| IFFO2    | 126917   | 5835 | 1.751381046 | 0.305511821 | 1.086296974 | 0.104076536 |
| EFNA3    | 1944     | 1782 | 5.734740966 | 1.6256032   | 4.742643353 | 1.363157326 |
| ATAT1    | 79969    | 2875 | 3.554542053 | 5.270477413 | 5.144324624 | 3.309271847 |
| PRR24    | 255783   | 849  | 12.0368768  | 12.33584945 | 11.9454282  | 17.64397628 |
| AMDHD2   | 51005    | 2077 | 4.920225519 | 4.07686183  | 4.679392885 | 9.356365356 |
| LPAR2    | 9170     | 1803 | 5.667946978 | 9.022066548 | 5.976440837 | 13.58507622 |
| HCG11    | 493812   | 5688 | 1.796643531 | 2.546435392 | 2.191596505 | 1.672671688 |
| C15orf40 | 123207   | 1700 | 6.011357884 | 6.553902492 | 7.581394378 | 5.834714285 |
| KCNN4    | 3783     | 2240 | 4.562191251 | 0.099478877 | 1.886471084 | 0.180740056 |
| C20orf29 | 55317    | 1960 | 5.213932858 | 8.754141186 | 6.467900858 | 5.680401767 |
| MUTYH    | 4595     | 1945 | 5.254143137 | 6.644882116 | 6.735041236 | 5.099750275 |
| THAP9    | 79725    | 4038 | 2.530784646 | 1.876253413 | 1.883668006 | 1.854845946 |
| GMDS     | 2762     | 1698 | 6.018438399 | 12.33584945 | 6.594871821 | 6.080018852 |
| TLR6     | 10333    | 5891 | 1.734732372 | 1.966949517 | 3.873494182 | 10.06818144 |
| HERC2P3  | 283755   | 4292 | 2.381013141 | 1.92097142  | 2.215240974 | 1.697912178 |
| CLEC4GP1 | 440508   | 1935 | 5.281296332 | 4.836678429 | 4.040070372 | 2.615359986 |
| COL18A1  | 80781    | 5910 | 1.729155398 | 2.073739029 | 2.359525254 | 1.575588443 |
| PIK3R3   | 8503     | 5693 | 1.79506559  | 5.910369822 | 2.301010926 | 6.827040521 |
| BTBD6    | 90135    | 2001 | 5.107100651 | 3.452180523 | 5.279479294 | 3.338407035 |
| PNPLA4   | 8228     | 2847 | 3.589500668 | 4.14827267  | 3.265377415 | 1.706460383 |
| KLF4     | 9314     | 2949 | 3.465347034 | 0.075562118 | 4.012189432 | 0.617789002 |
| PERP     | 64065    | 4319 | 2.366128364 | 2.218524067 | 2.592751181 | 0.93738765  |
| CCS      | 9973     | 1068 | 9.568640826 | 8.763083108 | 15.62874171 | 9.477006693 |
| CAB39L   | 81617    | 3691 | 2.768709944 | 2.354504119 | 2.976647952 | 1.809848951 |
| SRGAP3   | 9901     | 8901 | 1.148107898 | 0.500691349 | 0.498481068 | 0.090969043 |
| FZD7     | 8324     | 3851 | 2.600603021 | 1.446589748 | 2.743245408 | 3.837264865 |
| GSTZ1    | 2954     | 1485 | 6.744055377 | 6.602449918 | 5.122054821 | 3.544209048 |

|           |          |       |             |             |             |             |
|-----------|----------|-------|-------------|-------------|-------------|-------------|
| MGC12982  | 84793    | 2527  | 3.963166693 | 4.409036105 | 2.675549016 | 1.041383149 |
| ZNF567    | 163081   | 2702  | 3.706484913 | 3.381250953 | 3.518806166 | 2.172626582 |
| ZGPAT     | 84619    | 2028  | 4.938324573 | 11.53719522 | 6.35521225  | 14.67309805 |
| ANKHD1    | 54882    | 8233  | 1.216436564 | 1.678079249 | 1.283157788 | 2.212874732 |
| CG030     | 116828   | 4890  | 2.048041357 | 1.230364517 | 1.641885671 | 1.780049306 |
| C11orf80  | 79703    | 2323  | 4.311201995 | 2.398113267 | 4.274810066 | 1.219975928 |
| MOSPD1    | 56180    | 2358  | 4.247210447 | 4.252532152 | 5.555409332 | 4.721623182 |
| ST20      | 400410   | 1025  | 9.770655838 | 18.69620574 | 9.275916352 | 27.64882031 |
| DOLK      | 22845    | 2267  | 4.417698383 | 3.341998801 | 3.541606057 | 4.196804834 |
| SPSB3     | 90864    | 1553  | 6.448758683 | 7.89169199  | 5.714075967 | 6.126308151 |
| MST1      | 4485     | 2348  | 4.265299078 | 1.992966942 | 2.60956477  | 1.293199721 |
| MAN1C1    | 57134    | 3201  | 3.128685484 | 2.506084552 | 4.092363388 | 1.328024406 |
| ABCA3     | 21       | 6623  | 1.512142871 | 0.504679189 | 1.180361795 | 0.122258108 |
| METTL4    | 64863    | 3691  | 2.713335745 | 2.535619821 | 2.346972424 | 2.029224581 |
| SIGIRR    | 59307    | 1761  | 5.687065437 | 9.363781187 | 7.318779354 | 4.712994538 |
| FAM86B1   | 85002    | 2458  | 4.074419135 | 1.450497541 | 2.750655966 | 0.164710222 |
| PMVK      | 10654    | 1307  | 7.662526575 | 8.695077982 | 11.31593978 | 6.195221514 |
| ZNF619    | 285267   | 4201  | 2.38393769  | 1.591283157 | 2.715871724 | 2.987524281 |
| WT1-AS    | 51352    | 2354  | 4.254427457 | 0.378645174 | 5.026315478 | 0.859935696 |
| EXOG      | 9941     | 3146  | 3.183382783 | 4.887303003 | 3.223670866 | 3.088552264 |
| PVRL2     | 5819     | 2869  | 3.490736227 | 3.417440965 | 3.093049835 | 8.678546582 |
| C1orf21   | 81563    | 10308 | 0.971567931 | 0.410731569 | 0.676406396 | 0.03927607  |
| CDK14     | 5218     | 4953  | 2.021991164 | 3.104271199 | 1.109106359 | 2.166107356 |
| KPNA5     | 3841     | 2172  | 4.610921839 | 4.308919318 | 4.085616932 | 10.15872286 |
| ZNF324    | 25799    | 3231  | 3.099635479 | 2.551782524 | 2.484933746 | 1.503649864 |
| LOC100506 | 1.01E+08 | 2490  | 4.022057122 | 4.922007093 | 3.47898603  | 0.894264053 |
| C3orf62   | 375341   | 3590  | 2.789671932 | 4.282856615 | 3.943197496 | 8.683577965 |
| NBPF9     | 400818   | 2931  | 3.41689602  | 2.812968043 | 2.667190778 | 2.279137659 |
| BNC2      | 54796    | 12926 | 0.774788971 | 1.017107257 | 0.784594503 | 0.673405625 |
| OSCAR     | 126014   | 1946  | 5.04138544  | 10.19121734 | 6.623006394 | 17.1638039  |
| TPK1      | 27010    | 2449  | 4.005935511 | 3.275613169 | 3.796051245 | 2.810363961 |
| NEO1      | 4756     | 7088  | 1.384104975 | 0.911702576 | 0.864455147 | 0.885340682 |
| DMC1      | 11144    | 2269  | 4.323726781 | 2.65160092  | 3.631602333 | 1.249010172 |
| MON1A     | 84315    | 2244  | 4.371896643 | 3.475554352 | 5.461014331 | 2.706268221 |
| PYROXD2   | 84795    | 2083  | 4.709810881 | 3.958141784 | 4.564481162 | 2.235172275 |
| ARSG      | 22901    | 2770  | 3.541709771 | 5.71159589  | 5.796982622 | 4.969372809 |
| LSM11     | 134353   | 2561  | 3.830744266 | 4.089471372 | 4.620049448 | 1.02755768  |
| NPIPL3    | 23117    | 3638  | 2.69668391  | 2.572559857 | 2.323086986 | 2.7821449   |
| MCART1    | 92014    | 3723  | 2.635115785 | 2.573678604 | 2.497053317 | 5.219761172 |
| CHST4     | 10164    | 2197  | 4.46542379  | 0.304277676 | 2.500411377 | -           |
| ZC3H12D   | 340152   | 4907  | 1.999294083 | 2.225148064 | 1.937602254 | 2.805209432 |
| CASP6     | 839      | 1661  | 5.906403411 | 7.110254239 | 6.741777455 | 5.118610623 |
| MGAM      | 8972     | 6513  | 1.50630064  | 10.50355201 | 0.875892608 | 7.956669571 |
| STBD1     | 8987     | 2468  | 3.975095651 | 5.68819252  | 4.708533985 | 4.675220903 |
| RRAGB     | 10325    | 2227  | 4.405269899 | 3.702204461 | 3.88984069  | 4.45398037  |
| TRMT61A   | 115708   | 3257  | 3.012138798 | 3.010327949 | 3.762516475 | 2.299621716 |
| UGCG      | 7357     | 1637  | 5.992996986 | 3.130819639 | 5.420867426 | 3.338777825 |
| FAM89A    | 375061   | 1516  | 6.471329859 | 2.057821627 | 7.944084035 | 3.471735117 |
| SFXN3     | 81855    | 3129  | 3.135358283 | 3.062258052 | 6.752469203 | 6.792914864 |
| OGFOD2    | 79676    | 2080  | 4.716603878 | 4.606637233 | 4.672643761 | 3.698219612 |
| DGCR14    | 8220     | 5405  | 1.815085304 | 2.679764016 | 2.228164921 | 2.659102548 |
| LTK       | 4058     | 3143  | 3.121392321 | 0.354490431 | 3.361195695 | 0.515250049 |
| TNFAIP8L2 | 79626    | 1199  | 8.182265276 | 17.46978513 | 8.634656636 | 17.05197261 |
| EML2      | 24139    | 2910  | 3.371318236 | 4.288189122 | 3.12207723  | 5.147675553 |
| EFCAB7    | 84455    | 2376  | 4.129013496 | 2.625974399 | 3.645907077 | 2.044735989 |
| SFT2D3    | 84826    | 2824  | 3.473985859 | 5.207846031 | 3.067519552 | 3.082309174 |
| PRAM1     | 84106    | 2235  | 4.389501596 | 368.1973623 | 6.144746975 | 405.5823035 |
| COMTD1    | 118881   | 1041  | 9.424146077 | 14.76988977 | 11.56890624 | 3.500210887 |
| LDLRAD3   | 143458   | 2969  | 3.304323363 | 1.050743545 | 4.412143888 | 0.340904114 |
| PCBP4     | 57060    | 2188  | 4.483791621 | 3.258978936 | 2.896957423 | 1.202730904 |
| FAM50B    | 26240    | 1618  | 6.063372105 | 2.754421319 | 4.439852835 | 3.127763643 |
| ACTR3B    | 57180    | 2199  | 4.461362468 | 4.762681302 | 5.572767694 | 2.117264142 |

|           |          |       |             |             |             |             |
|-----------|----------|-------|-------------|-------------|-------------|-------------|
| TSPAN17   | 26262    | 2605  | 3.687581535 | 5.645664949 | 3.24429576  | 4.429345562 |
| ZNF782    | 158431   | 3313  | 2.899532115 | 2.555883495 | 2.614752555 | 3.60498126  |
| SLC15A3   | 51296    | 2134  | 4.501476053 | 4.698908535 | 4.950439582 | 69.24698686 |
| LYSMD1    | 388695   | 2649  | 3.626330652 | 3.364781952 | 3.270168069 | 2.674598038 |
| LOC146880 | 146880   | 2891  | 3.32277755  | 5.164230328 | 4.23885028  | 9.452748703 |
| OCLN      | 1.01E+08 | 6451  | 1.489094698 | 0.898101039 | 1.113576482 | 0.910004189 |
| MGC57346  | 401884   | 2608  | 3.683339685 | 4.699308919 | 2.997521538 | 4.88996103  |
| WDR24     | 84219    | 3165  | 3.035118451 | 3.309047767 | 4.138911597 | 1.471047029 |
| B4GALT7   | 11285    | 1747  | 5.498654779 | 7.27044249  | 5.684249447 | 4.866635515 |
| ABHD3     | 171586   | 2085  | 4.607266138 | 5.343709466 | 9.120205526 | 17.37878488 |
| TYRO3     | 7301     | 4001  | 2.40093724  | 0.22277699  | 1.848279592 | 0.101189134 |
| TMEM208   | 29100    | 808   | 11.88879938 | 12.41023616 | 15.16648039 | 11.27388469 |
| MSI2      | 124540   | 2151  | 4.465899534 | 4.247391945 | 4.714862178 | 3.8584767   |
| NBPF1     | 55672    | 4568  | 2.102922482 | 3.121999086 | 3.746511749 | 2.570243882 |
| CAMK2D    | 817      | 5872  | 1.63592471  | 1.745623893 | 1.187397331 | 2.895780737 |
| SUZ12P    | 440423   | 728   | 13.19526085 | 14.08008722 | 9.867694899 | 4.727047624 |
| ZNF669    | 79862    | 1998  | 4.807882832 | 7.249311566 | 4.547169539 | 4.052629889 |
| ALDH4A1   | 8659     | 3399  | 2.826169432 | 1.83563259  | 2.36211266  | 0.595554172 |
| TJP2      | 9414     | 4725  | 2.033047597 | 2.122216045 | 2.235817581 | 1.113894272 |
| SHC3      | 53358    | 9768  | 0.983430579 | 0.20531267  | 0.757060468 | 0.269407782 |
| MAP3K8    | 1326     | 3096  | 3.102761595 | 4.390437264 | 4.572376942 | 16.14984792 |
| C17orf97  | 400566   | 1839  | 5.223572538 | 5.573846383 | 3.906297926 | 3.082114281 |
| NFKBIZ    | 64332    | 3934  | 2.44182763  | 8.722987659 | 3.115026985 | 11.47474236 |
| GIN1      | 54826    | 3549  | 2.706720174 | 2.511498278 | 3.333881836 | 2.167454717 |
| MAFB      | 9935     | 3378  | 2.843738869 | 12.53351394 | 16.57503308 | 131.8364412 |
| LOC100289 | 1E+08    | 3842  | 2.500299297 | 3.247951678 | 3.574573006 | 2.476355169 |
| MSX1      | 4487     | 1940  | 4.951623659 | 2.297244173 | 5.772212553 | 0.730413423 |
| ATP5S     | 27109    | 1895  | 5.069208389 | 5.173951519 | 3.456373405 | 4.272904759 |
| C12orf5   | 57103    | 8237  | 1.166219485 | 1.406737842 | 1.74424715  | 2.162649015 |
| APOBEC3F  | 200316   | 4706  | 2.041255822 | 2.46223961  | 1.346906681 | 4.51658109  |
| DNAJC6    | 9829     | 5750  | 1.670634765 | 0.658809677 | 1.065610101 | 0.598485334 |
| MAR1      | 55016    | 5502  | 1.745937822 | 1.660512554 | 1.497656433 | 1.361299151 |
| RWDD3     | 25950    | 1336  | 7.19023196  | 6.171264473 | 7.274774718 | 6.21226301  |
| CCDC113   | 29070    | 5304  | 1.811114234 | 0.756219518 | 1.195049555 | 0.457983853 |
| TNFRSF10A | 8797     | 1764  | 5.445663208 | 9.221534006 | 8.743643752 | 10.4427588  |
| PYCRL     | 65263    | 2678  | 3.587061202 | 3.078718945 | 4.102616725 | 1.285022655 |
| NFKBIL1   | 4795     | 1510  | 6.361688674 | 5.312567318 | 5.876794687 | 6.032648234 |
| YPEL1     | 29799    | 4301  | 2.233468937 | 0.932571106 | 1.719359834 | 2.400342248 |
| LOC344887 | 344887   | 11312 | 0.849199956 | 0.689457564 | 0.896540713 | 1.181073635 |
| GUSBP11   | 91316    | 3442  | 2.790862841 | 5.179144329 | 1.902913307 | 5.293026632 |
| NR1D2     | 9975     | 5268  | 1.823490869 | 0.676788716 | 1.163108975 | 0.461113583 |
| TMEM22    | 80723    | 2079  | 4.620562722 | 0.857461028 | 3.150470227 | 1.752630848 |
| GLRX2     | 51022    | 1170  | 8.210384528 | 6.8563903   | 11.37687177 | 4.671435299 |
| PMM1      | 5372     | 1295  | 7.417876369 | 9.980151131 | 8.32086705  | 4.220524556 |
| THAP3     | 90326    | 2104  | 4.565660598 | 3.07136305  | 4.217661586 | 3.174977413 |
| MTHFD2L   | 441024   | 2372  | 3.963644068 | 2.536459734 | 4.186502438 | 2.304207125 |
| ZNF805    | 390980   | 10126 | 0.928477556 | 0.748203761 | 1.147606348 | 0.799639988 |
| TASP1     | 55617    | 2368  | 3.970339413 | 3.011252497 | 4.907374103 | 2.393584528 |
| ZNF642    | 339559   | 2176  | 4.320663479 | 5.325045775 | 4.757791042 | 3.255978954 |
| C19orf76  | 199800   | 2112  | 4.451592675 | 1.7936343   | 3.001203997 | 0.670928997 |
| TMEM170   | 124491   | 1068  | 8.80314956  | 6.676634749 | 7.913286942 | 11.94102843 |
| MSTO1     | 55154    | 2446  | 3.843730061 | 2.641924717 | 3.109669423 | 0.910350569 |
| RASSF7    | 8045     | 1746  | 5.384744404 | 9.444226043 | 7.502666211 | 11.36198658 |
| ST7L      | 54879    | 4552  | 2.065413825 | 2.839256528 | 1.995879776 | 3.201862507 |
| LOC493754 | 493754   | 3292  | 2.85594281  | 3.79059245  | 4.043420403 | 4.734818483 |
| IGF2BP2   | 10644    | 3676  | 2.557607108 | 0.96989199  | 3.965900036 | 0.660812393 |
| C6orf57   | 135154   | 526   | 17.87407553 | 10.59090707 | 10.44373345 | 8.081760688 |
| DNAJC4    | 3338     | 1300  | 7.232125946 | 23.48313678 | 12.67708568 | 28.49575532 |
| FAM122C   | 159091   | 2523  | 3.726422406 | 4.769308354 | 3.182251657 | 8.986140567 |
| EAF2      | 55840    | 1024  | 9.181409893 | 23.71949476 | 7.221647117 | 18.9777059  |
| ERP27     | 121506   | 1536  | 6.120939928 | 10.01006201 | 5.364652144 | 5.271584973 |
| PTPDC1    | 138639   | 4515  | 2.082339697 | 1.431261984 | 1.684662549 | 0.672521139 |

|           |        |      |             |             |             |             |
|-----------|--------|------|-------------|-------------|-------------|-------------|
| ZNF251    | 90987  | 3024 | 3.109048853 | 3.168586456 | 2.724902676 | 2.677630462 |
| SLC7A6OS  | 84138  | 1642 | 5.725800079 | 4.206950808 | 4.374958518 | 2.465637795 |
| LINC00338 | 654434 | 2183 | 4.306808855 | 4.695512367 | 4.54896188  | 3.430997677 |
| ELOVL3    | 83401  | 1347 | 6.979780052 | 2.15057528  | 8.156501552 | 5.410125513 |
| OSBPL6    | 114880 | 7315 | 1.28527187  | 0.4873989   | 0.77986173  | 0.304404305 |
| FHL1      | 2273   | 2906 | 3.235293782 | 0.613441665 | 3.126374652 | 0.766248277 |
| SORBS3    | 10174  | 3140 | 2.994192271 | 2.341872164 | 1.884067936 | 0.515742326 |
| SLC37A2   | 219855 | 4196 | 2.240649125 | 2.442875    | 2.165215619 | 3.955950134 |
| ALG11     | 440138 | 2595 | 3.623030339 | 3.606540562 | 3.663897596 | 4.056377986 |
| C4orf48   | 401115 | 483  | 19.46534934 | 20.76080914 | 18.37258794 | 20.11715408 |
| LOC40065  | 400657 | 3474 | 2.706322317 | 1.860146188 | 1.702928416 | 1.340202604 |
| HCST      | 10870  | 524  | 17.94229719 | 26.36569934 | 18.95111409 | 63.74191295 |
| FDXACB1   | 91893  | 3053 | 3.079516453 | 1.532750206 | 2.629813604 | 0.663049011 |
| TMED8     | 283578 | 978  | 9.613255348 | 10.02519236 | 11.66602977 | 4.139649549 |
| ARMC7     | 79637  | 2146 | 4.38106418  | 5.191814649 | 6.202674728 | 5.659707259 |
| ZNF749    | 388567 | 2929 | 3.209888607 | 1.673717673 | 2.380470169 | 0.760231305 |
| C6orf170  | 221322 | 5132 | 1.831988256 | 2.21443237  | 1.89382288  | 1.419999818 |
| C14orf149 | 112849 | 1381 | 6.807938979 | 5.4861052   | 4.130838926 | 4.250859541 |
| ZNF169    | 169841 | 3556 | 2.64391556  | 4.073150874 | 2.079574423 | 1.992410068 |
| RN7SL2    | 378706 | 299  | 31.44402585 | 33.53669168 | 64.30405781 | 46.71435299 |
| RNF25     | 64320  | 1566 | 6.003680543 | 7.683885681 | 7.1507614   | 10.85825319 |
| PPOX      | 5498   | 1777 | 5.290806826 | 4.639735135 | 2.972492422 | 2.392237548 |
| GABPB2    | 126626 | 1953 | 4.709358711 | 5.476686568 | 3.570095814 | 3.731407612 |
| DPM3      | 54344  | 532  | 17.28830369 | 16.7543372  | 14.69461686 | 9.893139919 |
| SNX16     | 64089  | 3471 | 2.64977746  | 1.669158687 | 1.460914512 | 1.632961153 |
| MAP3K15   | 389840 | 4633 | 1.985188336 | 1.394808517 | 1.504942181 | 0.305849782 |
| SLCO3A1   | 28232  | 5106 | 1.801288202 | 3.404024561 | 2.151744534 | 3.607721608 |
| RASSF3    | 283349 | 1337 | 6.879115604 | 13.33329452 | 8.691594521 | 20.28830788 |
| RBM4B     | 83759  | 1814 | 5.070219163 | 5.282141921 | 5.357827466 | 4.352108961 |
| GREB1     | 9687   | 8482 | 1.08434067  | 0.57796735  | 1.14584992  | 0.668239585 |
| MSRB2     | 22921  | 1811 | 5.078618201 | 6.644376022 | 3.850026021 | 7.041975906 |
| HAGH      | 3029   | 1648 | 5.580932987 | 4.19163424  | 5.76930477  | 4.667655821 |
| DCUN1D3   | 123879 | 2886 | 3.186894512 | 2.625194484 | 4.905086282 | 7.505158814 |
| ZBTB3     | 79842  | 2990 | 3.076046007 | 3.130091224 | 2.473232993 | 1.489443139 |
| DOHH      | 83475  | 2050 | 4.48652564  | 2.934869506 | 4.844089651 | 1.974915736 |
| ZNF227    | 7770   | 3075 | 2.991017093 | 4.782750307 | 3.985208507 | 4.34481462  |
| TMEM159   | 57146  | 1922 | 4.785316109 | 4.637516852 | 5.276622552 | 3.37030365  |
| NME6      | 10201  | 1189 | 7.735389034 | 9.183180448 | 7.463380973 | 7.491059689 |
| SGK1      | 6446   | 3208 | 2.867012956 | 2.847923963 | 7.178939834 | 9.717595042 |
| NUDT2     | 318    | 1060 | 8.676771285 | 7.567902501 | 6.577733137 | 7.065913141 |
| RAB32     | 10981  | 1234 | 7.453304345 | 10.47349734 | 7.019996123 | 1.804471226 |
| RABL5     | 64792  | 2459 | 3.74029181  | 1.812384585 | 3.86653691  | 1.399467536 |
| ZHX2      | 22882  | 4373 | 2.1032192   | 2.394954535 | 3.333786539 | 6.85101114  |
| CNPY4     | 245812 | 1547 | 5.945299006 | 4.897421643 | 6.692277509 | 3.009608176 |
| CRIPAK    | 285464 | 4467 | 2.058960726 | 2.344557014 | 1.51356892  | 1.540761437 |
| NR2C2AP   | 126382 | 1316 | 6.988888725 | 4.571795204 | 7.545884334 | 1.999677218 |
| C21orf2   | 755    | 2254 | 4.080469193 | 4.152161827 | 3.936983131 | 3.592348943 |
| RCAN1     | 1827   | 2457 | 3.660151157 | 4.262570689 | 5.073586048 | 6.014369962 |
| SCRN2     | 90507  | 1849 | 4.863705459 | 6.025762162 | 2.399664677 | 6.240370572 |
| ATP2A1    | 487    | 3570 | 2.519045208 | 6.803574968 | 2.781620108 | 17.91807302 |
| S100A13   | 6284   | 951  | 9.456352675 | 5.85785186  | 12.44158427 | 13.6229729  |
| DHRX      | 207063 | 2596 | 3.46417234  | 4.377683714 | 5.534423641 | 5.146496516 |
| FLT1      | 2321   | 7123 | 1.262528625 | 3.660174662 | 1.453454065 | 25.463465   |
| ACSL6     | 23305  | 6554 | 1.372137839 | 0.135997977 | 0.290137756 | 0.216204156 |
| CD163L1   | 283316 | 4598 | 1.955848498 | 2.132370189 | 2.159718091 | 1.981143722 |
| NRP1      | 8829   | 5895 | 1.52552865  | 1.549811717 | 0.68098566  | 3.845976701 |
| NR1H3     | 10062  | 1720 | 5.228483369 | 2.979739389 | 5.404959012 | 1.765367991 |
| C1RL      | 51279  | 3398 | 2.646554265 | 18.689616   | 2.735882725 | 33.0629838  |
| LOC72885  | 728855 | 1287 | 6.987561301 | 4.501670399 | 8.865094882 | 5.505058433 |
| ITPR3     | 3710   | 9047 | 0.994030219 | 0.615764023 | 1.471309823 | 1.342514842 |
| GOLGA2P5  | 55592  | 2453 | 3.666119606 | 1.271772355 | 3.445328355 | 1.650459543 |
| SPATA20   | 64847  | 2640 | 3.406436134 | 4.389128639 | 2.641059517 | 2.530360787 |

|          |        |       |             |             |             |             |
|----------|--------|-------|-------------|-------------|-------------|-------------|
| CCL20    | 6364   | 851   | 10.56755745 | 26.18480432 | 6.703511818 | 104.6635719 |
| RRP7B    | 91695  | 2332  | 3.856342793 | 2.197749464 | 3.080481083 | 1.649291765 |
| APLF     | 200558 | 3869  | 2.324370999 | 1.670237234 | 2.56665386  | 1.360338702 |
| TMEM55A  | 55529  | 2420  | 3.716112146 | 4.880219955 | 6.111542684 | 9.954146567 |
| TTC14    | 151613 | 4813  | 1.868479409 | 3.37976023  | 1.843748177 | 3.911465667 |
| C14orf80 | 283643 | 1719  | 5.231524953 | 4.407394579 | 5.653926133 | 1.530875636 |
| ZNF670   | 93474  | 4198  | 2.142208526 | 1.061613553 | 2.617152832 | 1.25372807  |
| SRD5A3   | 79644  | 4089  | 2.199313131 | 2.016338796 | 4.133719958 | 0.742585704 |
| METTL18  | 92342  | 1445  | 6.223523456 | 4.317865171 | 4.532752666 | 3.922496998 |
| TRAF5    | 7188   | 4013  | 2.240964713 | 0.555277061 | 2.421903569 | 0.706205851 |
| NRN1     | 51299  | 2072  | 4.340246812 | 4.086699817 | 6.526170235 | 12.99374458 |
| OTOF     | 9381   | 7171  | 1.254077729 | 0.435038012 | 1.738362979 | 81.44014358 |
| ANKRD16  | 54522  | 2646  | 3.398711789 | 1.852728293 | 2.874622604 | 0.535526092 |
| ITGB7    | 3695   | 2798  | 3.214078411 | 28.75003545 | 4.002177395 | 80.37829405 |
| FAM89B   | 23625  | 1477  | 6.08868747  | 11.01339606 | 9.155196159 | 9.456730903 |
| HSD17B7  | 51478  | 1533  | 5.866269663 | 6.831791378 | 4.961677371 | 8.979232016 |
| CCDC168  | 643677 | 21470 | 0.41886313  | 0.45666689  | 0.619978573 | 0.094284519 |
| C17orf61 | 254863 | 490   | 18.35304366 | 13.64281743 | 21.12847614 | 6.609922056 |
| EFNB1    | 1947   | 3344  | 2.689291685 | 2.132370189 | 2.337779955 | 1.392303782 |
| C14orf93 | 60686  | 2380  | 3.778567813 | 3.932341495 | 4.79385593  | 3.912490629 |
| KIAA1107 | 23285  | 4569  | 1.968262507 | 1.072952301 | 1.063591489 | 1.81649888  |
| LRRC28   | 123355 | 1464  | 6.142753684 | 3.80520295  | 5.484167303 | 3.456777031 |
| AGER     | 177    | 1691  | 5.318149849 | 3.953270575 | 3.37355917  | 5.267220562 |
| CXorf21  | 80231  | 1927  | 4.666835181 | 11.21679835 | 5.701508869 | 16.49264737 |
| NAT14    | 57106  | 1368  | 6.573824118 | 1.628893894 | 6.177916999 | 1.627717465 |
| MAML3    | 55534  | 7086  | 1.269120998 | 0.817619221 | 0.775247501 | 0.771320816 |
| ZFAND2A  | 90637  | 907   | 9.915095252 | 11.05564588 | 10.24975689 | 22.09532242 |
| ACPL2    | 92370  | 3198  | 2.812067353 | 1.045181448 | 3.435524575 | 0.063298581 |
| LOC64521 | 645212 | 1865  | 4.8219793   | 6.690954609 | 4.984734316 | 3.69039214  |
| MAP7     | 9053   | 4608  | 1.951604035 | 2.176100437 | 3.393027852 | 6.369831842 |
| LOC37444 | 374443 | 2613  | 3.44163467  | 2.473076103 | 2.830067603 | 1.549398109 |
| GSDMB    | 55876  | 1646  | 5.463542767 | 1.759917923 | 4.621051889 | 10.45349535 |
| RHOH     | 399    | 1999  | 4.498745069 | 2.229441568 | 4.122113903 | 16.10114518 |
| PRKCQ    | 5588   | 3286  | 2.736759402 | 3.322824575 | 1.607461666 | 2.032913109 |
| FAM18B2  | 201158 | 4244  | 2.070830638 | 1.995203115 | 2.041158156 | 2.00330166  |
| FAM174A  | 345757 | 1260  | 6.975083513 | 3.183324068 | 7.042825379 | 4.016445694 |
| C6orf162 | 57150  | 2441  | 3.600411809 | 2.464761363 | 2.769812521 | 1.409787247 |
| ANKS3    | 124401 | 2662  | 3.301504593 | 3.097223642 | 4.047904895 | 1.74900971  |
| FZD6     | 8323   | 3806  | 2.309144831 | 2.868839084 | 1.609894398 | 2.659338715 |
| ATP6V1E2 | 90423  | 2025  | 4.340051963 | 2.420898303 | 2.086763075 | 1.59943793  |
| FAM184B  | 27146  | 3855  | 2.279793833 | 2.080927795 | 1.863471306 | 2.835579403 |
| APOL4    | 80832  | 3417  | 2.572023771 | 3.521499847 | 2.535169803 | 3.317534775 |
| CHD5     | 26038  | 9663  | 0.909511045 | 0.599570506 | 1.005805549 | 0.398028397 |
| MOB2     | 81532  | 1707  | 5.148567795 | 4.177296961 | 6.807651948 | 6.285137514 |
| FAM22D   | 728130 | 5543  | 1.585532244 | 2.291442004 | 1.6009309   | 1.752947036 |
| BRF2     | 55290  | 2007  | 4.378976196 | 4.885220792 | 4.84260041  | 5.950823575 |
| C15orf41 | 84529  | 2595  | 3.386745752 | 2.747840428 | 4.070997329 | 1.560145379 |
| RPP40    | 10799  | 1174  | 7.486035116 | 3.226708382 | 10.07831911 | 1.206986406 |
| FAM86DP  | 692099 | 2527  | 3.477880976 | 2.11633733  | 2.759159923 | 1.762340714 |
| CEP19    | 84984  | 2160  | 4.068798716 | 2.785408559 | 5.086484996 | 1.780624257 |
| CDK11A   | 728642 | 2650  | 3.316454802 | 4.372565889 | 5.8202972   | 5.805507013 |
| SUOX     | 6821   | 2564  | 3.427693146 | 4.779952286 | 3.131365418 | 3.710669485 |
| FAM165B  | 54065  | 917   | 9.584084216 | 9.477071652 | 9.446755961 | 3.752770633 |
| TRAF4    | 9618   | 2902  | 3.02846493  | 1.228574416 | 5.314882005 | 2.371668277 |
| EML6     | 400954 | 7853  | 1.119139848 | 0.681011643 | 1.130008911 | 0.670208893 |
| FAM134B  | 54463  | 3259  | 2.696718388 | 4.444346274 | 1.037298614 | 3.913169183 |
| BCL2A1   | 597    | 955   | 9.202727985 | 168.9328416 | 5.973495871 | 721.7489826 |
| ELL3     | 80237  | 2127  | 4.131925353 | 2.514332127 | 3.278042842 | 1.142052823 |
| CTXN1    | 404217 | 1290  | 6.812872268 | 0.690954061 | 4.586025828 | 0.313843198 |
| ZNF2     | 7549   | 3951  | 2.224400209 | 1.409976492 | 2.459908636 | 1.946924017 |
| ZNF527   | 84503  | 5126  | 1.714515261 | 1.608429445 | 1.195329317 | 1.184718277 |
| LENG1    | 79165  | 906   | 9.700447269 | 8.362374483 | 6.063359598 | 9.607550891 |



|          |        |      |             |             |             |             |
|----------|--------|------|-------------|-------------|-------------|-------------|
| DTNB     | 1838   | 2496 | 3.521075812 | 1.785518307 | 3.047376366 | 1.135418302 |
| APBB3    | 10307  | 2167 | 4.055655388 | 3.907541311 | 4.582549047 | 5.978517411 |
| SUMF1    | 285362 | 2179 | 4.033320434 | 5.113186892 | 4.945168807 | 4.552094669 |
| DAAM1    | 23002  | 4256 | 2.064991829 | 2.408435972 | 3.62401024  | 1.807400562 |
| GABARAPL | 23710  | 1885 | 4.66239004  | 7.447458429 | 7.061506613 | 33.50546697 |
| THBS3    | 7059   | 3176 | 2.767193081 | 4.770976877 | 2.594491717 | 5.67259723  |
| HHLA3    | 11147  | 915  | 9.605033034 | 4.870659776 | 10.16014153 | 4.86714206  |
| TRIM23   | 373    | 3914 | 2.245428009 | 1.707966413 | 1.565472172 | 1.60329452  |
| ZNF441   | 126068 | 4470 | 1.966130923 | 1.844476361 | 1.181682111 | 2.853024243 |
| PAFAH2   | 5051   | 3581 | 2.454232121 | 3.546903946 | 2.006054702 | 5.935501427 |
| ACBD4    | 79777  | 2057 | 4.272535355 | 6.499738009 | 3.389595102 | 7.380731513 |
| LILRA2   | 11027  | 1774 | 4.95411794  | 14.82201623 | 2.382015348 | 13.80715469 |
| KLHL17   | 339451 | 2581 | 3.405116322 | 1.640380089 | 2.128401316 | 1.725468805 |
| FADS3    | 3995   | 1807 | 4.863644287 | 0.986530978 | 8.184799831 | 1.120248273 |
| GALE     | 2582   | 1647 | 5.336129463 | 5.005955881 | 8.595069224 | 4.670489856 |
| TBCEL    | 219899 | 4041 | 2.174859002 | 2.702004838 | 2.248266453 | 4.508437928 |
| C17orf90 | 339229 | 635  | 13.84032319 | 13.33486932 | 8.983761507 | 9.244782718 |
| UBE2L6   | 9246   | 1642 | 5.352378335 | 19.67767313 | 6.047736775 | 179.8682771 |
| CPS1     | 1373   | 5773 | 1.522363628 | 1.659761899 | 0.439185369 | 0.490906648 |
| TFPI     | 7035   | 3927 | 2.23799471  | 1.986031058 | 0.645637162 | 1.494891017 |
| SLC25A42 | 284439 | 3132 | 2.80606808  | 1.849824331 | 2.630940515 | 0.969486892 |
| SNX12    | 29934  | 642  | 13.68941624 | 22.21385019 | 10.20222368 | 19.86451459 |
| ZMAT3    | 64393  | 9113 | 0.941975097 | 1.613843651 | 1.437469023 | 1.421644599 |
| POLD4    | 57804  | 981  | 8.750478143 | 31.34649388 | 9.261207685 | 48.07943432 |
| ZNF101   | 94039  | 1458 | 5.887667392 | 6.571883021 | 7.10079102  | 17.07733206 |
| FAM21A   | 387680 | 4735 | 1.812929051 | 1.317701198 | 1.784876548 | 1.453554665 |
| PLCD4    | 84812  | 3237 | 2.651905795 | 1.789820761 | 1.892881705 | 0.750431373 |
| APBA3    | 9546   | 2158 | 3.977858692 | 5.059685613 | 5.77655279  | 7.31670589  |
| LOC33980 | 339803 | 2557 | 3.357144723 | 2.875822681 | 4.214127035 | 2.533329532 |
| RAD51D   | 5892   | 2478 | 3.46417234  | 6.294708609 | 4.177947259 | 3.594378519 |
| ZBTB22   | 9278   | 2681 | 3.201872084 | 3.490851458 | 1.891396596 | 4.37928909  |
| CA5B     | 11238  | 6032 | 1.423113239 | 1.182136259 | 1.15590138  | 1.812194728 |
| GSTM2    | 2946   | 1478 | 5.807996656 | 2.8645609   | 4.145641461 | 1.506574758 |
| LRTOMT   | 220074 | 3630 | 2.364798639 | 2.823775068 | 2.386411905 | 2.509448714 |
| STXBP4   | 252983 | 6046 | 1.419817906 | 0.847692979 | 1.118278591 | 0.636147601 |
| NEIL2    | 252969 | 2746 | 3.12608123  | 0.811481008 | 2.769938605 | 0.663459493 |
| WIPI1    | 55062  | 1939 | 4.427137214 | 4.941622199 | 6.211052809 | 13.36301932 |
| KIAA1328 | 57536  | 4875 | 1.760865448 | 1.234150254 | 1.516916235 | 1.121144472 |
| C17orf89 | 284184 | 560  | 15.3289626  | 9.947887712 | 17.35553397 | 3.614801124 |
| ZNF181   | 339318 | 2951 | 2.908918691 | 1.359196315 | 2.291125843 | 1.783514211 |
| LPPR2    | 64748  | 2748 | 3.123806062 | 1.459602738 | 3.229243078 | 2.283586154 |
| FNBP1L   | 54874  | 5371 | 1.598253409 | 0.497857423 | 1.691536909 | 0.829163095 |
| IL15RA   | 3601   | 1853 | 4.632606075 | 9.01913187  | 3.876784612 | 22.50423409 |
| KIAA1539 | 80256  | 3045 | 2.819119559 | 13.02601573 | 4.648958624 | 22.80233169 |
| CCT6P1   | 643253 | 1783 | 4.814480683 | 6.498765904 | 3.673487158 | 3.40598199  |
| KLHL13   | 90293  | 3991 | 2.150894277 | 0.390836581 | 2.964657138 | 0.456492049 |
| MPPE1    | 65258  | 2806 | 3.059237013 | 4.92360173  | 3.388387121 | 6.204163298 |
| ZNF737   | 1E+08  | 8419 | 1.019624547 | 1.005777648 | 1.179520582 | 1.274347278 |
| ARHGAP11 | 89839  | 1045 | 8.214563692 | 7.036821623 | 3.639354741 | 5.811354917 |
| GFOD1    | 54438  | 3032 | 2.831206813 | 13.52282783 | 3.066137698 | 16.29044939 |
| EFR3B    | 22979  | 7500 | 1.144562541 | 0.326821271 | 0.619768633 | 0.21592412  |
| C1orf201 | 90529  | 2881 | 2.979597035 | 1.314875266 | 2.420130901 | 0.843160831 |
| GCA      | 25801  | 3241 | 2.648632847 | 8.388024541 | 1.629780634 | 24.42137779 |
| C19orf44 | 84167  | 3364 | 2.551789256 | 1.788490633 | 1.947035554 | 0.842450678 |
| ZNF35    | 7584   | 2664 | 3.222304451 | 4.349586939 | 3.489688251 | 3.191446038 |
| VENTX    | 27287  | 2428 | 3.53551032  | 9.452951618 | 3.828883649 | 19.50920673 |
| CASP9    | 842    | 2165 | 3.964997255 | 10.70420287 | 3.025324528 | 13.46409065 |
| PCBD2    | 84105  | 2395 | 3.584225076 | 5.024202495 | 4.587393566 | 3.211814945 |
| SLC25A20 | 788    | 1909 | 4.496709826 | 11.32256177 | 5.976624994 | 31.81176474 |
| DNAJC18  | 202052 | 5113 | 1.638926832 | 1.394610974 | 1.652922053 | 0.791820313 |
| DAPP1    | 27071  | 2953 | 2.837735486 | 22.5624696  | 3.362811982 | 80.82073465 |
| TCP11L1  | 55346  | 2817 | 2.97473656  | 3.796936055 | 3.300152467 | 3.161828175 |

|           |        |      |             |             |             |             |
|-----------|--------|------|-------------|-------------|-------------|-------------|
| ZNF850    | 342892 | 7721 | 1.085329995 | 1.096702761 | 0.903043275 | 1.337115919 |
| ADAM22    | 53616  | 9334 | 0.897775111 | 0.692323533 | 1.199709916 | 0.325308865 |
| PDCD2L    | 84306  | 1174 | 7.137847436 | 4.175740259 | 7.738709317 | 2.586399442 |
| KLRD1     | 3824   | 3258 | 2.572078849 | 3.693359416 | 2.39948931  | 3.727971693 |
| ODF2      | 4957   | 3899 | 2.149226184 | 1.31447852  | 1.788252661 | 0.467263341 |
| HAPLN4    | 404037 | 3461 | 2.421217246 | 0.450687314 | 2.56398728  | 0.058488548 |
| DNASE1L1  | 1774   | 3147 | 2.66280041  | 6.939181158 | 2.484123346 | 6.303790457 |
| CCDC23    | 374969 | 816  | 10.26940305 | 12.28856717 | 6.991039898 | 8.93068513  |
| ZNF564    | 163050 | 2963 | 2.828158248 | 2.857793459 | 2.353154615 | 4.782322108 |
| ZNF549    | 256051 | 4136 | 2.026071782 | 1.831796731 | 2.298794551 | 1.12569242  |
| CRADD     | 8738   | 1201 | 6.977379592 | 4.824021485 | 5.629568995 | 2.359703648 |
| CHRN1     | 1140   | 2437 | 3.438585511 | 2.46880693  | 2.600961363 | 2.491943327 |
| FKBP11    | 51303  | 986  | 8.498816318 | 8.587872231 | 6.214257687 | 8.006821151 |
| BTBD9     | 114781 | 8967 | 0.934519113 | 1.043712809 | 1.248811459 | 1.557666058 |
| CD79B     | 974    | 1303 | 6.431184106 | 1.368120858 | 6.648254195 | 1.087491973 |
| C19orf47  | 126526 | 2140 | 3.915809762 | 3.74858722  | 5.232753436 | 3.121566578 |
| SERPINA1  | 5265   | 3532 | 2.372546118 | 9.715807885 | 6.400755794 | 43.09923696 |
| PADI2     | 11240  | 4363 | 1.920658467 | 39.6328589  | 1.355941627 | 146.6136161 |
| ZNF585B   | 92285  | 6210 | 1.349409483 | 1.14825216  | 0.816559464 | 1.108306174 |
| UBE2CBP   | 90025  | 1849 | 4.532089178 | 2.651335351 | 3.542362143 | 0.656881113 |
| KBTBD4    | 55709  | 2468 | 3.395394202 | 3.430973266 | 2.9107301   | 2.132556903 |
| TCTN2     | 79867  | 2934 | 2.856112096 | 2.430349663 | 3.528613942 | 1.034912387 |
| FTX       | 1E+08  | 2356 | 3.556805131 | 2.837428074 | 2.421344888 | 2.74945824  |
| PLEKHG5   | 57449  | 5221 | 1.605024495 | 0.298760543 | 2.751841366 | 0.426492529 |
| KLHL11    | 55175  | 2326 | 3.60267966  | 2.299219447 | 2.089230228 | 1.392459934 |
| USP6NL    | 9712   | 4739 | 1.768270287 | 2.115946574 | 1.694201505 | 2.861940033 |
| TSEN34    | 79042  | 2315 | 3.619798225 | 6.641665334 | 3.741976335 | 10.05586144 |
| TST       | 7263   | 1167 | 7.180662288 | 12.60236263 | 7.966177806 | 4.163061449 |
| FAM115C   | 285966 | 4903 | 1.709123575 | 1.317998747 | 1.637532313 | 2.518490851 |
| MPV17L2   | 84769  | 1360 | 6.161641831 | 4.26003662  | 9.166030088 | 3.4234293   |
| HOOK2     | 29911  | 2628 | 3.188673094 | 3.137294268 | 2.894311799 | 2.46488722  |
| LDOC1L    | 84247  | 5355 | 1.564861417 | 1.040301983 | 1.183668131 | 0.869442362 |
| RFFL      | 117584 | 4197 | 1.94792631  | 2.176826322 | 2.215041577 | 2.845676177 |
| PEX10     | 5192   | 2094 | 3.904224795 | 3.511689874 | 3.027002312 | 1.546734387 |
| APBB2     | 323    | 9004 | 0.907979423 | 0.569208324 | 0.351984831 | 0.359713661 |
| LOC100130 | 1E+08  | 3024 | 2.703520741 | 2.726458114 | 1.746732485 | 2.744571224 |
| ATP2B2    | 491    | 8962 | 0.912234626 | 0.049728338 | 0.42436127  | -           |
| SHROOM1   | 134549 | 4039 | 2.024126448 | 1.213745745 | 2.144757419 | 0.551304158 |
| ANKDD1A   | 348094 | 3126 | 2.615306053 | 6.629379297 | 2.635990305 | 11.00860739 |
| ZNF391    | 346157 | 1596 | 5.122460352 | 3.909345346 | 4.368669878 | 4.819734832 |
| ZNF193    | 7746   | 1851 | 4.416772945 | 5.898866317 | 5.8214602   | 4.374475699 |
| ARG2      | 384    | 1981 | 4.126929188 | 3.037093634 | 6.18602532  | 2.759000151 |
| SNAI3     | 333929 | 1713 | 4.77259003  | 11.57741328 | 4.070284369 | 6.144950889 |
| SEMA7A    | 8482   | 3393 | 2.409503897 | 1.641855915 | 5.293016421 | 38.12320761 |
| CKLF      | 51192  | 888  | 9.206584146 | 12.29594769 | 10.70699804 | 32.59834167 |
| SUSD3     | 203328 | 1205 | 6.784603089 | 25.14958102 | 9.643702801 | 50.90119956 |
| ZNF331    | 55422  | 5163 | 1.583468278 | 1.294786082 | 2.005220474 | 0.901774908 |
| TRIM39    | 56658  | 3578 | 2.284920828 | 2.30430669  | 2.066787772 | 1.923583382 |
| RP9P      | 441212 | 1405 | 5.818823289 | 3.806394615 | 4.812179618 | 3.169704616 |
| JPX       | 554203 | 1696 | 4.820428492 | 3.678841493 | 4.733974606 | 4.296839072 |
| KIAA1841  | 84542  | 4592 | 1.780367317 | 1.60136729  | 1.932482573 | 1.013907632 |
| LOC44094  | 440944 | 1907 | 4.287072219 | 4.206594993 | 2.880652226 | 4.246017052 |
| LOC64898  | 648987 | 2783 | 2.93763806  | 3.763254108 | 3.26455075  | 5.018897429 |
| IFI44L    | 10964  | 5889 | 1.388257212 | 0.908131166 | 0.215267205 | 169.0516468 |
| ZNF607    | 84775  | 4364 | 1.873383758 | 1.225477643 | 1.646123255 | 0.603019069 |
| JMJD4     | 65094  | 2612 | 3.129956632 | 2.474022916 | 3.801831464 | 1.084993906 |
| C1QTNF3   | 114899 | 3843 | 2.127360583 | 1.739521348 | 2.474060437 | 0.579421674 |
| MYH3      | 4621   | 6037 | 1.354223409 | 1.291890669 | 1.084947425 | 0.938878278 |
| RPL23AP7  | 118433 | 1482 | 5.516495764 | 3.007188728 | 5.560125299 | 1.639100105 |
| CNNM2     | 54805  | 4071 | 2.008215849 | 1.696834494 | 1.816498808 | 1.093941288 |
| C9orf37   | 85026  | 1468 | 5.569105396 | 5.768148515 | 5.469224068 | 3.44735802  |
| C7orf36   | 57002  | 907  | 9.013722957 | 9.335878743 | 8.852062769 | 4.463701498 |

|          |        |      |             |             |             |             |
|----------|--------|------|-------------|-------------|-------------|-------------|
| ZNF747   | 65988  | 2392 | 3.417828897 | 6.521023383 | 5.564774233 | 4.485254907 |
| LHPP     | 64077  | 1703 | 4.800614634 | 4.18710858  | 4.466383681 | 3.20938303  |
| DGKH     | 160851 | 4299 | 1.901708937 | 0.622003307 | 1.277832937 | 0.376699443 |
| FCGR2B   | 2213   | 2174 | 3.76055507  | 4.612452076 | 7.872155322 | 60.52380907 |
| NKIRAS1  | 28512  | 2013 | 4.06132475  | 2.988813953 | 3.673604892 | 3.519627523 |
| FAM156A  | 29057  | 2339 | 3.495274357 | 0.857415204 | 2.980930793 | 0.519270277 |
| OTX1     | 5013   | 2872 | 2.846604012 | 2.250051482 | 1.986312172 | 1.057253811 |
| SLC25A4  | 291    | 4420 | 1.84964858  | 1.714097575 | 2.246693164 | 0.686975779 |
| TPST2    | 8459   | 2018 | 3.949980453 | 1.766760632 | 4.606803518 | 2.106544164 |
| HS1BP3   | 64342  | 2403 | 3.31712882  | 4.451089833 | 4.220419703 | 9.603366782 |
| KBTBD7   | 84078  | 3008 | 2.649953642 | 4.370720878 | 2.388192116 | 2.759170007 |
| TSKS     | 60385  | 1812 | 4.399040041 | 2.582498002 | 4.664122767 | 1.67573562  |
| WDR5B    | 54554  | 4183 | 1.905584641 | 2.237382921 | 2.07092403  | 1.935729027 |
| DNM1P46  | 196968 | 3831 | 2.080673598 | 1.861301465 | 1.489086024 | 0.845435084 |
| SDC1     | 6382   | 3309 | 2.408903159 | 5.926042991 | 2.490210243 | 2.691710477 |
| CCT6P3   | 643180 | 2244 | 3.552166022 | 3.376252799 | 2.824662585 | 4.149611273 |
| NT5M     | 56953  | 1633 | 4.881237326 | 3.411400562 | 4.657839197 | 0.991690694 |
| EPHA1    | 2041   | 3369 | 2.366001945 | 0.727562936 | 2.006860304 | 0.240342966 |
| ECRP     | 643332 | 605  | 13.1753067  | 1.473273949 | 5.936927179 | -           |
| C7orf41  | 222166 | 5814 | 1.371011447 | 1.916345758 | 0.835835829 | 0.417809831 |
| MED7     | 9443   | 1400 | 5.693614681 | 4.934152305 | 5.885789781 | 7.807970428 |
| TRNAU1AF | 54952  | 2032 | 3.922766021 | 5.812072978 | 5.302914778 | 3.48671762  |
| ADCK1    | 57143  | 2249 | 3.54426881  | 3.17058511  | 2.348652305 | 1.710159358 |
| OPN3     | 23596  | 2632 | 3.028518447 | 2.709211973 | 3.130739245 | 0.615285298 |
| LZTS2    | 84445  | 2858 | 2.789034483 | 4.054338561 | 2.217824647 | 3.399784962 |
| ZC3H10   | 84872  | 2121 | 3.758161506 | 3.046745807 | 2.390775235 | 1.81336558  |
| BBS2     | 583    | 2814 | 2.83264412  | 4.672042786 | 3.453837606 | 4.60392581  |
| UBE2V1   | 7335   | 2539 | 3.13944882  | 2.720682642 | 2.995766605 | 2.072922582 |
| CD48     | 962    | 1099 | 7.253012333 | 3.244151916 | 16.14915373 | 81.22941635 |
| GCAT     | 23464  | 1656 | 4.813442363 | 3.902263199 | 5.358671484 | 1.466875819 |
| TAF13    | 6884   | 577  | 13.814663   | 11.97194667 | 17.21037051 | 13.68236682 |
| SPRYD4   | 283377 | 2122 | 3.756390459 | 3.255331398 | 3.186198098 | 2.957254831 |
| GPR155   | 151556 | 7473 | 1.066648007 | 0.77527764  | 0.904738708 | 1.760722078 |
| CCDC15   | 80071  | 3897 | 2.045435092 | 1.429514272 | 1.843387705 | 0.207779177 |
| MPND     | 84954  | 1583 | 5.035414121 | 4.082215955 | 3.603719872 | 1.918150944 |
| PMS2P5   | 5383   | 1323 | 6.024989081 | 7.916202708 | 6.707452742 | 6.273305655 |
| ZSCAN22  | 342945 | 4643 | 1.716790987 | 2.015716726 | 1.547206954 | 0.784776983 |
| LOC10013 | 1E+08  | 1714 | 4.650560416 | 5.980340431 | 4.807529576 | 11.1016996  |
| UACA     | 55075  | 7096 | 1.12331744  | 0.439636075 | 0.47640307  | 0.399380508 |
| LACE1    | 246269 | 2262 | 3.523899449 | 5.516635873 | 3.456028369 | 3.311170614 |
| ITGA11   | 22801  | 5035 | 1.583130199 | 0.132770219 | 0.419632098 | 0.160817369 |
| NR4A1    | 3164   | 2692 | 2.961018036 | 2.566052462 | 3.139446677 | 8.121217385 |
| DPH1     | 1801   | 2200 | 3.623209343 | 2.532189599 | 4.129656699 | 1.380196793 |
| RDH10    | 157506 | 3531 | 2.257451304 | 1.451473166 | 2.752506095 | 0.458632371 |
| HSPBAP1  | 79663  | 1958 | 4.071021733 | 2.845156853 | 3.992612957 | 6.099746126 |
| KCNC4    | 3749   | 4445 | 1.793264467 | 1.353539367 | 1.711192668 | 0.455408016 |
| TMEM180  | 79847  | 2834 | 2.812653689 | 2.437478203 | 3.876784612 | 12.14287463 |
| INPP5K   | 51763  | 3391 | 2.350651888 | 2.037102102 | 2.679222866 | 2.984795974 |
| TMEM67   | 91147  | 4744 | 1.68024042  | 1.972802015 | 2.583161079 | 0.682728037 |
| MEX3A    | 92312  | 6124 | 1.301610149 | 0.363867872 | 0.966030914 | 0.231385049 |
| ZNF684   | 127396 | 2108 | 3.781338024 | 2.325578304 | 3.307588769 | 5.569674597 |
| TESK1    | 7016   | 2559 | 3.114912291 | 1.915716711 | 3.30261448  | 4.508966467 |
| BCDIN3D  | 144233 | 3266 | 2.440618663 | 1.296332214 | 1.035075377 | 0.557826015 |
| SHANK1   | 50944  | 6643 | 1.199918795 | 0.234807887 | 0.127222497 | -           |
| TMEM65   | 157378 | 4318 | 1.846007539 | 1.393349349 | 1.663659538 | 2.812814214 |
| FAM22A   | 728118 | 3308 | 2.347845945 | 2.896555455 | 1.596771171 | 4.099979993 |
| SLC39A13 | 91252  | 2429 | 3.197478133 | 4.862137625 | 4.697149903 | 5.416993039 |
| ACP6     | 51205  | 1832 | 4.239451084 | 2.675938354 | 4.267214067 | 1.657441563 |
| KLC4     | 89953  | 2674 | 2.904515477 | 3.333323631 | 3.002550835 | 3.633726785 |
| ZFAT     | 57623  | 4710 | 1.648975453 | 2.128974695 | 2.42237306  | 1.375312869 |
| METTL21D | 79609  | 1784 | 4.353517032 | 4.121905043 | 3.434561704 | 2.042443685 |
| ZNF624   | 57547  | 4250 | 1.827452797 | 0.681605859 | 1.242851537 | 0.904976093 |

|           |        |       |             |             |             |             |
|-----------|--------|-------|-------------|-------------|-------------|-------------|
| C2orf63   | 130162 | 5360  | 1.449006415 | 2.577542249 | 1.300820359 | 2.152694998 |
| CROCCP3   | 114819 | 5368  | 1.446846942 | 1.868008721 | 1.495681992 | 1.169019142 |
| CYB5R1    | 51706  | 1675  | 4.636820529 | 3.857998721 | 4.288765305 | 5.680093468 |
| DECR2     | 26063  | 1599  | 4.857207246 | 4.738155898 | 2.642711212 | 1.265971626 |
| ZNF14     | 7561   | 2967  | 2.617686008 | 2.328214771 | 2.634828504 | 2.865524855 |
| LRP2BP    | 55805  | 5158  | 1.50575308  | 1.123235712 | 1.105988476 | 0.824157837 |
| NUDT3     | 11165  | 2410  | 3.222686467 | 5.177854915 | 3.85748112  | 2.015889092 |
| ANKRD35   | 148741 | 3363  | 2.309448226 | 1.590242175 | 1.130872942 | 0.782508242 |
| NRARP     | 441478 | 2639  | 2.943036902 | 0.928821346 | 4.083184096 | 0.306826621 |
| NHSL2     | 340527 | 3678  | 2.111656984 | 0.121170574 | 3.331842349 | 0.33022653  |
| MTSS1     | 9788   | 5010  | 1.550234408 | 0.266865491 | 4.259433313 | 0.363644664 |
| SLC45A3   | 85414  | 3398  | 2.285660502 | 0.1311552   | 7.523677494 | 0.47658355  |
| ADAM1     | 8759   | 2840  | 2.734744502 | 2.589253027 | 2.529465453 | 1.140444298 |
| SURF2     | 6835   | 844   | 9.202220836 | 8.976672134 | 12.01619496 | 4.796892487 |
| ZNF180    | 7733   | 3140  | 2.47346318  | 2.058008872 | 3.162542606 | 1.224888024 |
| CTTNBP2N  | 55917  | 5901  | 1.316162411 | 1.095093689 | 0.751903065 | 2.126858075 |
| IFT46     | 56912  | 1875  | 4.142226339 | 4.753763941 | 4.28203783  | 3.670710048 |
| BARX1     | 56033  | 1498  | 5.184695852 | 6.991412672 | 2.82089134  | 2.026991285 |
| LOC64685  | 646851 | 10322 | 0.752438906 | 0.496527005 | 0.69595833  | 0.353005186 |
| RDH13     | 112724 | 2425  | 3.202752324 | 3.124252075 | 2.439576626 | 2.587750413 |
| COQ6      | 51004  | 1609  | 4.827019506 | 7.894010584 | 8.010174296 | 4.780793532 |
| CACNA1A   | 773    | 8646  | 0.898296829 | 0.670095975 | 0.855304956 | 3.535364134 |
| NINJ1     | 4814   | 1297  | 5.988183798 | 35.56389032 | 8.633841443 | 162.1615949 |
| FUT10     | 84750  | 3549  | 2.188412056 | 2.951010477 | 2.976680211 | 1.368918769 |
| NHSL1     | 57224  | 7491  | 1.036800746 | 0.684174576 | 1.015385317 | 0.378321196 |
| NAT1      | 9      | 2349  | 3.306374792 | 3.794511447 | 3.597867371 | 7.497365295 |
| ASAP2     | 8853   | 5724  | 1.356861353 | 1.167886188 | 1.107362481 | 1.556056948 |
| LOC388789 | 388789 | 561   | 13.84433937 | 17.87427952 | 17.70121887 | 16.95928085 |
| ADCK4     | 79934  | 2458  | 3.159753615 | 3.626243853 | 3.266403959 | 4.364820886 |
| PIK3R5    | 23533  | 4507  | 1.677898429 | 10.728798   | 3.422184952 | 23.3105347  |
| PIGF      | 5281   | 1162  | 6.507993303 | 5.944761813 | 7.454970065 | 3.658352945 |
| HOXA1     | 3198   | 2561  | 2.952865372 | 20.53436689 | 5.197555629 | 73.74702426 |
| SPDYE5    | 442590 | 2667  | 2.835503644 | 2.08879532  | 2.218212718 | 3.036053438 |
| IGIP      | 492311 | 2900  | 2.607685592 | 2.535682275 | 2.185704428 | 2.861925304 |
| VIT       | 5212   | 2832  | 2.670299512 | 7.474966473 | 1.044486815 | 4.14578886  |
| PAX6      | 5080   | 6947  | 1.08856891  | 0.994359181 | 0.669103894 | 0.495363563 |
| RFX8      | 731220 | 1729  | 4.37379307  | 0.902156618 | 2.44401112  | 0.819550052 |
| MFSD11    | 79157  | 2538  | 2.979624987 | 5.180113633 | 3.24669255  | 7.656883705 |
| SULT1A1   | 6817   | 1598  | 4.732345568 | 2.928339411 | 3.437674465 | 1.013411079 |
| C9orf72   | 203228 | 3233  | 2.33909317  | 1.447413047 | 1.960576196 | 3.25589263  |
| SIX1      | 6495   | 2687  | 2.814398295 | 1.243948743 | 2.201702016 | 1.205382139 |
| MED11     | 400569 | 860   | 8.793358393 | 5.959478778 | 8.844478383 | 4.472265577 |
| LMTK3     | 114783 | 4972  | 1.520975104 | 10.48729852 | 1.572312182 | 21.29330155 |
| ERCC5     | 2073   | 4091  | 1.848518264 | 2.069822053 | 1.187863484 | 1.979260454 |
| ZNF697    | 90874  | 5080  | 1.488639413 | 1.579129262 | 1.330927631 | 1.833017263 |
| LRRC34    | 151827 | 1892  | 3.996981088 | 2.82663025  | 3.685199326 | 1.176911994 |
| LNP1      | 348801 | 2233  | 3.386604665 | 2.195395909 | 3.027815658 | 0.543919918 |
| FAM86C2P  | 645332 | 1859  | 4.067933415 | 2.996674082 | 1.704825939 | 0.435565063 |
| SMUG1     | 23583  | 1570  | 4.816744088 | 8.232035487 | 5.383051245 | 10.31484652 |
| LOC646278 | 646278 | 2100  | 3.601089627 | 6.048315729 | 3.219577316 | 4.241366652 |
| FAM86C1   | 55199  | 2127  | 3.555377629 | 1.466693741 | 2.880704316 | 0.475855343 |
| CECR6     | 27439  | 5043  | 1.499561415 | 0.176746131 | 1.80155557  | 0.240843382 |
| ZDHHC24   | 254359 | 1319  | 5.733349672 | 8.784912514 | 7.368536029 | 7.827044739 |
| ZBTB49    | 166793 | 2960  | 2.554827101 | 2.333720685 | 2.641059517 | 2.735525175 |
| FAM106A   | 80039  | 2281  | 3.315338982 | 2.735342031 | 2.500959472 | 2.129895971 |
| CABLES1   | 91768  | 5024  | 1.505232527 | 1.286255545 | 1.850423865 | 3.666605599 |
| ZNF845    | 91664  | 4311  | 1.75418423  | 1.654058435 | 1.372297221 | 1.408690765 |
| ZNF793    | 390927 | 7136  | 1.059737699 | 1.061702814 | 0.680990683 | 1.021221842 |
| TLL1      | 25809  | 1877  | 4.028922865 | 2.967936664 | 4.052344917 | 1.402011304 |
| MST1P2    | 11209  | 2642  | 2.862334677 | 0.927766666 | 3.198860884 | 0.536336881 |
| ZNF449    | 203523 | 4059  | 1.812737632 | 1.09796839  | 1.405441872 | 1.496148285 |
| EPHB6     | 2051   | 4044  | 1.819461437 | 2.534694238 | 1.933119726 | 0.951075271 |

|           |        |      |             |             |             |             |
|-----------|--------|------|-------------|-------------|-------------|-------------|
| SDF2L1    | 23753  | 876  | 8.399431563 | 9.920633225 | 9.165320698 | 6.239245776 |
| ZKSCAN4   | 387032 | 2307 | 3.189381036 | 4.249951508 | 3.754952413 | 5.878948339 |
| LOC10013  | 1E+08  | 3182 | 2.312351367 | 2.100873835 | 1.128799794 | 1.335954155 |
| TSPAN32   | 10077  | 1376 | 5.347312536 | 3.886616594 | 3.378099382 | 0.588455997 |
| CXCR2     | 3579   | 2880 | 2.554827101 | 12.30222114 | 1.320529759 | 7.872233559 |
| CBLB      | 868    | 3976 | 1.850578986 | 1.232977632 | 2.125601221 | 0.967341146 |
| C20orf94  | 128710 | 1407 | 5.229496837 | 4.276106957 | 5.105672982 | 2.877453631 |
| HLX       | 3142   | 2308 | 3.187999155 | 4.151562151 | 1.556256908 | 4.911618859 |
| ZNF18     | 7566   | 2767 | 2.659162288 | 3.140757031 | 1.908969655 | 2.19474734  |
| SEC61A2   | 55176  | 2528 | 2.91056252  | 2.732521055 | 2.423757152 | 2.802614796 |
| C6orf1    | 221491 | 1244 | 5.914712258 | 5.911156428 | 5.774663896 | 10.41434665 |
| ZBTB25    | 7597   | 1609 | 4.572965848 | 3.739268172 | 4.202058647 | 3.648500327 |
| LEPREL4   | 10609  | 2619 | 2.809431863 | 1.446412998 | 2.984931718 | 1.700433366 |
| DCBLD1    | 285761 | 2010 | 3.660647786 | 4.101895192 | 3.468854291 | 4.129145961 |
| LHFP      | 10186  | 2180 | 3.375184426 | 0.408867311 | 0.872276538 | -           |
| ARMC4     | 55130  | 3572 | 2.059882993 | 0.374299023 | 0.650652961 | 0.113342029 |
| HSD3B7    | 80270  | 2233 | 3.295074809 | 2.594558801 | 4.352485008 | 9.97186517  |
| IL18BP    | 10068  | 2796 | 2.631581563 | 5.578786814 | 2.267003877 | 8.398336231 |
| ACOT8     | 10005  | 1188 | 6.193520244 | 7.690353598 | 7.113965029 | 7.326970629 |
| LOC15762  | 157627 | 2942 | 2.500986421 | 0.605935241 | 0.574533681 | 1.99538988  |
| LY6G5B    | 58496  | 774  | 9.506333397 | 13.5311837  | 9.008265019 | 9.153759953 |
| RN7SK     | 125050 | 332  | 22.16235557 | 11.41010735 | 48.36639115 | 18.29176472 |
| TRMT12    | 55039  | 2232 | 3.296551097 | 1.996708645 | 2.271879154 | 1.541796895 |
| PXN       | 5829   | 3834 | 1.919118949 | 28.30451682 | 3.967788946 | 61.77406616 |
| PRR7      | 80758  | 1543 | 4.768569054 | 2.743889183 | 5.203383624 | 1.180725707 |
| FANCF     | 2188   | 3309 | 2.223602916 | 2.087583326 | 1.340882438 | 2.079958096 |
| TWIST1    | 7291   | 1669 | 4.408569233 | 2.403228475 | 2.405278889 | 0.363862546 |
| ZFP14     | 57677  | 7502 | 0.980792062 | 1.069311737 | 0.675930988 | 0.836482905 |
| FAM185A   | 222234 | 2296 | 3.204661171 | 2.620419202 | 4.509126005 | 2.644976432 |
| GBP5      | 115362 | 4065 | 1.810062005 | 4.878747587 | 1.091507992 | 63.54224579 |
| C10orf25  | 220979 | 3212 | 2.227122005 | 2.636252186 | 2.039174222 | 1.827657854 |
| WDPCP     | 51057  | 3326 | 2.150786495 | 1.741927181 | 1.842230331 | 1.460701356 |
| RSPH3     | 83861  | 2201 | 3.2501208   | 3.138488517 | 2.303877452 | 7.541647779 |
| SDC4      | 6385   | 2615 | 2.735570127 | 3.578957078 | 3.393483739 | 5.883209784 |
| BBC3      | 27113  | 1843 | 3.881451916 | 1.692706232 | 4.814953867 | 1.867222284 |
| GBP3      | 2635   | 3051 | 2.344646307 | 11.39360827 | 0.969513818 | 59.11639361 |
| FAM110B   | 90362  | 4368 | 1.63770968  | 2.958858909 | 2.418552671 | 2.317180208 |
| C21orf62  | 56245  | 4132 | 1.731247793 | 1.995355599 | 1.687414599 | 1.420725321 |
| SPDYE8P   | 389517 | 2884 | 2.480414661 | 3.167871038 | 2.051308363 | 3.439325341 |
| COL4A1    | 1282   | 6549 | 1.092306594 | 0.88466175  | 1.096912794 | 0.896386781 |
| RIMKLB    | 57494  | 5845 | 1.22386927  | 1.029338321 | 0.686811029 | 0.658023678 |
| YY2       | 404281 | 2741 | 2.609819731 | 2.032403181 | 3.314573053 | 1.181635099 |
| TXLNB     | 167838 | 4685 | 1.526897734 | 1.236638165 | 1.217649639 | 2.894927176 |
| SLMO1     | 10650  | 1734 | 4.125441685 | 1.92761838  | 3.168052939 | 0.350222946 |
| C2orf48   | 348738 | 1902 | 3.761049359 | 1.757355558 | 4.554508526 | 1.383583185 |
| ZNF514    | 84874  | 3204 | 2.232682859 | 1.182320737 | 3.033426661 | 1.958581383 |
| BBS9      | 27241  | 4019 | 1.77992433  | 1.441565017 | 1.89257313  | 1.208831229 |
| DUSP19    | 142679 | 5379 | 1.329896985 | 1.657056589 | 1.29622553  | 0.978462621 |
| CROCC     | 9696   | 6656 | 1.074746977 | 1.004354048 | 0.793587595 | 0.152064951 |
| FRAT1     | 10023  | 2651 | 2.698421683 | 2.437626502 | 2.869200833 | 9.926726588 |
| C4orf34   | 201895 | 1683 | 4.250455069 | 4.104464187 | 3.515135661 | 18.64318108 |
| ANXA8L2   | 244    | 2053 | 3.48442079  | -           | 4.425350579 | -           |
| ZNF211    | 10520  | 2512 | 2.847737214 | 3.636998437 | 1.513983163 | 3.223389538 |
| RNF122    | 79845  | 1868 | 3.82950529  | 3.578683374 | 4.411191485 | 25.68289107 |
| STAP1     | 26228  | 1524 | 4.693908059 | 1.754588069 | 6.931914743 | 75.04744591 |
| LARGE     | 9215   | 4201 | 1.702812635 | 0.530427719 | 0.301763525 | 0.144557626 |
| MREG      | 55686  | 3213 | 2.226428846 | 1.525776242 | 3.551004393 | 1.260061394 |
| MEF2C     | 4208   | 6449 | 1.109244206 | 2.556926449 | 2.424418102 | 8.31813439  |
| TRIB2     | 28951  | 4408 | 1.62284843  | 0.202207518 | 2.923858993 | 1.377691899 |
| ZNF10     | 7556   | 4417 | 1.619541744 | 0.706284262 | 1.195861226 | 0.412465421 |
| ANP32A-IT | 80035  | 3281 | 2.180285243 | 2.784559608 | 2.575858109 | 3.08486533  |
| PPP1R3F   | 89801  | 3448 | 2.07468558  | 1.874172813 | 1.593214558 | 1.409017608 |

|           |        |       |             |             |             |             |
|-----------|--------|-------|-------------|-------------|-------------|-------------|
| GMPPB     | 29925  | 1664  | 4.29898791  | 7.231349144 | 5.205934625 | 2.068083335 |
| ABCA11P   | 79963  | 1895  | 3.774942418 | 4.938771905 | 4.459836651 | 4.059259521 |
| SH3TC1    | 54436  | 4273  | 1.674120262 | 1.303725045 | 4.25239632  | 1.326470434 |
| KIAA1024  | 23251  | 6742  | 1.061037657 | 1.090696914 | 0.783464704 | 0.360300557 |
| FMN1      | 342184 | 12355 | 0.578997643 | 0.378752439 | 0.307820777 | 1.376286887 |
| NLRP1     | 22861  | 5623  | 1.27218849  | 0.198143949 | 0.864227194 | 0.612002609 |
| STX1A     | 6804   | 2138  | 3.345891432 | 3.75209385  | 3.458824438 | 7.763875941 |
| TRIM62    | 55223  | 3865  | 1.850844989 | 2.594429706 | 2.569310164 | 4.766112944 |
| KCND1     | 3750   | 4720  | 1.515575399 | 1.321888808 | 1.880076266 | 2.873460555 |
| ZNF492    | 57615  | 4245  | 1.637015245 | 1.522296315 | 1.19454282  | 0.762982758 |
| FAM102A   | 399665 | 4161  | 1.670062416 | 2.677633799 | 2.1834282   | 2.140559954 |
| CYTIP     | 9595   | 2282  | 3.045192688 | 3.124735281 | 5.740427346 | 39.6519289  |
| HIST2H2BF | 440689 | 1875  | 3.706202514 | 1.426129182 | 3.943982212 | 2.914975627 |
| NUMBL     | 9253   | 3561  | 1.951454567 | 0.500606986 | 1.898655536 | 0.568460722 |
| TTLL11    | 158135 | 3280  | 2.118637108 | 1.019051912 | 1.288321716 | 0.432012817 |
| LRRC27    | 80313  | 8205  | 0.846938417 | 1.385066048 | 0.721020514 | 0.740142095 |
| C18orf45  | 85019  | 2994  | 2.321018608 | 1.488528288 | 1.834804207 | 0.676115107 |
| C9orf93   | 203238 | 4359  | 1.594202733 | 1.738084717 | 1.357185895 | 1.068103659 |
| DNM1P41   | 440299 | 4466  | 1.556007549 | 1.347174762 | 1.703146307 | 0.543919918 |
| ZNF695    | 57116  | 3392  | 2.048682109 | 0.985403971 | 1.43265021  | 0.537104884 |
| ERVW-1    | 30816  | 3044  | 2.282894124 | 1.390874182 | 1.179974029 | 1.729024454 |
| ARHGAP31  | 57514  | 8096  | 0.858341121 | 0.7706664   | 1.539748137 | 0.650092692 |
| ZNF579    | 163033 | 2173  | 3.197942804 | 3.281475339 | 4.667127725 | 2.794692079 |
| CCDC150   | 284992 | 3685  | 1.885788253 | 1.693165583 | 2.580139555 | 0.933864497 |
| C3orf78   | 440957 | 467   | 14.88036341 | 8.588840097 | 9.048597917 | 0.866933032 |
| LINC00426 | 1E+08  | 1589  | 4.373272318 | 4.908208915 | 4.653849369 | 3.694422294 |
| ZNF503-AS | 253264 | 1867  | 3.722083403 | 8.832147119 | 4.526722257 | 5.312808937 |
| NOG       | 9241   | 1892  | 3.67290154  | 0.11777626  | 2.791817671 | -           |
| ANO10     | 55129  | 2746  | 2.530637186 | 3.327072132 | 3.92407969  | 0.51602405  |
| RPL32P3   | 132241 | 2075  | 3.348978175 | 3.866012844 | 3.767487311 | 4.097355298 |
| ABCA13    | 154664 | 17207 | 0.40385481  | 0.789957213 | 0.061395002 | 0.070585993 |
| KATNAL2   | 83473  | 2850  | 2.438291128 | 1.876485766 | 2.59472514  | 1.704664109 |
| PLA2G6    | 8398   | 3239  | 2.145455299 | 1.307138317 | 1.108935148 | 0.999957335 |
| ITGAE     | 3682   | 3878  | 1.791936491 | 1.723821697 | 2.179316775 | 0.99178659  |
| TREML2    | 79865  | 3758  | 1.84915639  | 4.802939719 | 1.855347825 | 14.3822529  |
| TAPBPL    | 55080  | 1834  | 3.78905655  | 21.74866443 | 4.608173639 | 32.45042841 |
| USP49     | 25862  | 3194  | 2.17568244  | 1.046490379 | 2.249117685 | 1.20417921  |
| CBY1      | 25776  | 1287  | 5.399479187 | 7.098787937 | 3.94004217  | 2.359310757 |
| PAX8      | 7849   | 4065  | 1.709503005 | 1.260799938 | 0.98755485  | 1.394343951 |
| SLC25A14  | 9016   | 1601  | 4.340493263 | 4.175503149 | 5.806701749 | 4.551804539 |
| OPHN1     | 4983   | 7531  | 0.92273665  | 1.331492606 | 0.953881541 | 1.15581478  |
| LLGL2     | 3993   | 3590  | 1.935690728 | 1.924181957 | 2.942684699 | 3.326825324 |
| C2orf74   | 339804 | 887   | 7.834419068 | 8.541500881 | 12.14827827 | 6.39008812  |
| PLA2G3    | 50487  | 2593  | 2.679957468 | 1.374979929 | 0.977792957 | -           |
| C9orf3    | 84909  | 3851  | 1.804500055 | 1.735907697 | 1.042433255 | 0.946174898 |
| SNHG10    | 283596 | 1972  | 3.523899449 | 3.050954609 | 2.678559348 | 1.026515532 |
| FLT3      | 2322   | 3848  | 1.80590689  | 0.289543509 | 1.592322786 | 0.263031267 |
| CRYL1     | 51084  | 1516  | 4.58385865  | 5.291541326 | 3.90235707  | 1.869395832 |
| FAM173A   | 65990  | 876   | 7.932796477 | 3.815628163 | 6.512201549 | 2.772998123 |
| CDK5R1    | 8851   | 3870  | 1.795640753 | 1.209169607 | 1.637866367 | 2.196902389 |
| AUTS2     | 26053  | 6426  | 1.081408297 | 0.277413862 | 0.427435714 | -           |
| COQ10A    | 93058  | 1674  | 4.151212493 | 9.184859765 | 6.941852972 | 4.353308881 |
| FAM86A    | 196483 | 2374  | 2.927181851 | 1.407957149 | 2.402985913 | 0.682152866 |
| RABAC1    | 10567  | 821   | 8.464226204 | 7.05682071  | 10.03666954 | 8.629732282 |
| C15orf61  | 145853 | 1313  | 5.292558807 | 3.903390517 | 4.98844448  | 0.925036693 |
| ZNF350    | 59348  | 2358  | 2.860366219 | 3.213024292 | 3.4049283   | 6.266881678 |
| MEF2BNB   | 729991 | 1515  | 4.451975938 | 4.853781252 | 3.765470995 | 5.745505681 |
| CCDC111   | 201973 | 2295  | 2.938886076 | 2.718655849 | 3.774586151 | 1.675881654 |
| TIFA      | 92610  | 3090  | 2.182764901 | 2.812451361 | 2.39319309  | 6.944161642 |
| SDHAP1    | 255812 | 2590  | 2.604148087 | 1.634679927 | 2.447313838 | 2.266578002 |
| DALRD3    | 55152  | 2242  | 3.00836019  | 3.279874485 | 3.863815886 | 2.708682377 |
| GRK5      | 2869   | 2575  | 2.619317882 | 2.942256808 | 4.348773729 | 4.559562738 |

|           |        |      |             |             |             |             |
|-----------|--------|------|-------------|-------------|-------------|-------------|
| GUSBP3    | 653188 | 1469 | 4.591384306 | 3.48887117  | 3.883382271 | 1.653605416 |
| LOC100329 | 1E+08  | 1000 | 6.744743545 | 3.565322956 | 4.225695227 | 1.214573178 |
| DPY19L1P3 | 1E+08  | 1913 | 3.525741529 | 2.679117485 | 2.871617248 | 2.64543731  |
| CEBPB     | 1051   | 1837 | 3.671607809 | 52.76658566 | 4.830680445 | 118.1294181 |
| ZNF691    | 51058  | 1591 | 4.239310839 | 4.20174767  | 3.187199417 | 3.435310685 |
| HIST1H2BK | 85236  | 863  | 7.815461814 | 14.45959484 | 9.058558714 | 37.76482843 |
| C19orf59  | 199675 | 1326 | 5.086533594 | 114.1051229 | 2.549439051 | 259.8295058 |
| ZNF555    | 148254 | 8547 | 0.789135784 | 0.443214653 | 0.914652647 | 0.497368214 |
| FAHD2B    | 151313 | 1286 | 5.244746147 | 4.158619311 | 5.421770704 | 0.629638765 |
| WHAMMP    | 339005 | 3589 | 1.879282125 | 2.297244173 | 2.001583139 | 3.496960018 |
| ZSCAN20   | 7579   | 4243 | 1.589616673 | 1.260425273 | 1.593474514 | 1.431267002 |
| TSNARE1   | 203062 | 1915 | 3.522059293 | 1.97814916  | 1.323977617 | 0.951362802 |
| GNA11     | 2767   | 1615 | 4.176311793 | 1.793699629 | 4.186447284 | 0.877400644 |
| DGCR6L    | 85359  | 1217 | 5.542106447 | 6.774699536 | 4.166667439 | 2.994017694 |
| HABP4     | 22927  | 2708 | 2.490673392 | 1.069728546 | 2.73078532  | 0.44851299  |
| PEX12     | 5193   | 2693 | 2.504546434 | 1.489412672 | 1.412226403 | 2.104718961 |
| RNF165    | 494470 | 5276 | 1.278382021 | 0.971408595 | 0.680788655 | 1.726553987 |
| RPS17     | 6218   | 511  | 13.19910674 | 7.413220432 | 11.5772472  | 4.753711067 |
| C6orf223  | 221416 | 3638 | 1.853970188 | 5.145119714 | 0.87115762  | 5.286075311 |
| PEPD      | 5184   | 2019 | 3.340635733 | 3.090299739 | 5.964948686 | 2.306024689 |
| NARFL     | 64428  | 2109 | 3.198076598 | 3.909345346 | 3.907115075 | 3.071466863 |
| SYDE2     | 84144  | 4711 | 1.431701029 | 1.040611137 | 1.03153248  | 0.429694042 |
| MICAL2    | 9645   | 3934 | 1.714474719 | 0.056642777 | 1.020439874 | 0.051456244 |
| ALOX5AP   | 241    | 1242 | 5.430550359 | 522.8135615 | 14.45990718 | 1219.951722 |
| GAS2L1    | 10634  | 2963 | 2.276322493 | 0.075205091 | 2.210539184 | 0.136637775 |
| SMPD2     | 6610   | 1697 | 3.974510044 | 6.828108195 | 5.104699597 | 3.936448131 |
| LRR37A2   | 474170 | 5175 | 1.303332086 | 0.732010752 | 0.898215411 | 1.056150589 |
| LOC283070 | 283070 | 2427 | 2.779045548 | 0.367256176 | 3.917517207 | 0.750663274 |
| LOC100170 | 1E+08  | 1010 | 6.677963906 | 2.426890626 | 5.439013659 | 1.402972318 |
| ZNF628    | 89887  | 3867 | 1.744179867 | 1.3829802   | 1.529861215 | 1.465737823 |
| GPR3      | 2827   | 2145 | 3.144402585 | 0.623308209 | 2.364025302 | 0.566234582 |
| PCTP      | 58488  | 2172 | 3.105314708 | 4.514105952 | 7.490297709 | 12.67510376 |
| ZNF566    | 84924  | 5262 | 1.281783266 | 0.338780212 | 1.405352841 | 0.538579263 |
| COQ3      | 51805  | 1265 | 5.331813079 | 3.170741759 | 7.683082231 | 1.280182533 |
| KLRAP1    | 10748  | 2208 | 3.054684577 | 2.926697399 | 1.626739558 | 1.37519608  |
| LOC257390 | 257396 | 2352 | 2.867663072 | 2.179061118 | 1.527143258 | 1.118867015 |
| EXOC6B    | 23233  | 2594 | 2.600132438 | 1.460352984 | 1.30322135  | 1.248597458 |
| GAN       | 8139   | 4544 | 1.439339212 | 0.686544363 | 1.580915908 | 0.133645816 |
| LOC541470 | 541471 | 809  | 8.08449614  | 10.19135888 | 13.58072632 | 9.007959291 |
| CYB5A     | 1528   | 874  | 7.483246427 | 3.824359578 | 6.527103612 | 2.084507742 |
| IRX5      | 10265  | 2078 | 3.147428959 | 0.750639458 | 3.45701727  | 0.194830474 |
| ZNF778    | 197320 | 3608 | 1.812737632 | 1.358735883 | 1.288321716 | 1.290427896 |
| UBTD1     | 80019  | 1575 | 4.152607859 | 4.24443209  | 6.170856522 | 5.26957675  |
| GADD45A   | 1647   | 1398 | 4.678367223 | 10.20121017 | 7.103278815 | 11.14951534 |
| CRY1      | 1407   | 3273 | 1.998276009 | 1.361641825 | 1.613846329 | 0.865873535 |
| ZNF70     | 7621   | 4042 | 1.618099302 | 1.323103521 | 1.097718948 | 0.901464506 |
| RAB11FIP5 | 26056  | 4362 | 1.499394172 | 0.561934785 | 1.743753189 | 1.345813165 |
| MFSD9     | 84804  | 2706 | 2.41698351  | 3.787990945 | 4.216325615 | 4.787674512 |
| COMMD3    | 23412  | 942  | 6.943054541 | 10.40832073 | 8.971752075 | 10.74463179 |
| PPIEL     | 728448 | 2640 | 2.477408097 | 3.798284399 | 2.240898984 | 1.99361759  |
| DHRS13    | 147015 | 1939 | 3.373056925 | 1.95366459  | 4.467599389 | 2.087971768 |
| ZNF846    | 162993 | 2133 | 3.066271626 | 3.969827483 | 3.863153161 | 3.321617536 |
| HINT2     | 84681  | 652  | 10.03122297 | 12.30364517 | 10.69386062 | 6.51994804  |
| SH3YL1    | 26751  | 1805 | 3.623466691 | 2.59251323  | 2.22405012  | 2.018681182 |
| MAMDC4    | 158056 | 3669 | 1.782599449 | 2.975961175 | 1.785180595 | 0.496554856 |
| MGC72080  | 389538 | 728  | 8.984007387 | 3.673066232 | 7.836110655 | 6.673478999 |
| FAM45B    | 55855  | 2508 | 2.607797997 | 0.621941305 | 1.600642132 | 1.533551992 |
| SLC43A2   | 124935 | 3024 | 2.162816593 | 12.30590554 | 4.192157964 | 54.62366143 |
| ZNF417    | 147687 | 4703 | 1.390677733 | 1.610952856 | 1.392691389 | 1.205189913 |
| ARRDC4    | 91947  | 4074 | 1.605389636 | 1.804977564 | 1.607714188 | 1.93783153  |
| RRN3P3    | 1E+08  | 2492 | 2.624541484 | 1.1624498   | 1.441348693 | 1.949555662 |
| C9orf139  | 401563 | 3815 | 1.714379391 | 2.044336557 | 1.938392306 | 1.326532523 |

|           |        |       |             |             |             |             |
|-----------|--------|-------|-------------|-------------|-------------|-------------|
| ANK2      | 287    | 14243 | 0.459198018 | 0.172095733 | 0.103840015 | 0.071062579 |
| TRAF1     | 7185   | 4450  | 1.469743231 | 1.452168058 | 1.519351093 | 3.00231572  |
| TMEM53    | 79639  | 1614  | 4.052266033 | 4.141871464 | 3.272688373 | 6.647292278 |
| PLEKHO1   | 51177  | 1627  | 4.019887755 | 13.14808711 | 7.531970596 | 42.42670084 |
| C14orf86  | 283592 | 2468  | 2.650063767 | 2.347508024 | 1.969023303 | 1.476385548 |
| NRIP2     | 83714  | 2787  | 2.346737487 | 1.758995    | 2.046892198 | 1.089498724 |
| IQCC      | 55721  | 2293  | 2.8523146   | 3.012565734 | 2.672157906 | 1.147656005 |
| DHFRL1    | 200895 | 4047  | 1.616100167 | 2.092325678 | 1.044154986 | 1.70066255  |
| ACADS     | 35     | 1934  | 3.381777341 | 5.18483496  | 4.806892192 | 4.396076652 |
| ZNF808    | 388558 | 3311  | 1.975342005 | 2.557427369 | 1.595324384 | 3.973988551 |
| CXorf40B  | 541578 | 1359  | 4.812625002 | 4.591107559 | 5.907888839 | 4.766536876 |
| CHCHD5    | 84269  | 698   | 9.370139509 | 7.023379748 | 9.686407398 | 3.480152372 |
| MGST2     | 4258   | 1278  | 5.11765053  | 12.20523312 | 7.108955194 | 13.46357852 |
| SLC29A3   | 55315  | 2283  | 2.864808312 | 8.198837284 | 3.886973271 | 6.472758211 |
| OCEL1     | 79629  | 1124  | 5.818823289 | 8.524737939 | 5.075345691 | 9.725230071 |
| LOC439949 | 439949 | 2253  | 2.902954895 | 3.263860895 | 1.875585986 | 2.246214636 |
| SLC37A1   | 54020  | 3098  | 2.111154738 | 5.826161221 | 1.977810871 | 9.801268381 |
| LOC100133 | 1E+08  | 2740  | 2.386991744 | 1.626515947 | 2.467559257 | 1.034308059 |
| NSUN3     | 63899  | 1465  | 4.464407766 | 3.65050132  | 4.182428723 | 5.527067931 |
| ZNF8      | 7554   | 2210  | 2.959437727 | 2.218243921 | 2.868118933 | 2.015128952 |
| AQP3      | 360    | 1835  | 3.564227454 | 0.121434706 | 6.563068882 | 1.213470023 |
| RTKN      | 6242   | 2638  | 2.479286345 | 0.506821876 | 3.684268015 | 1.304507456 |
| RBM45     | 129831 | 1860  | 3.516321171 | 3.953483116 | 5.906885801 | 3.917977993 |
| FCGR1A    | 2209   | 2268  | 2.793638099 | 2.063265599 | 4.751112359 | 7.318856597 |
| PQLC2     | 54896  | 2279  | 2.780154107 | 4.791049387 | 2.966701344 | 5.507059896 |
| RFESD     | 317671 | 2814  | 2.251588916 | 1.029433156 | 2.552836491 | 1.510663156 |
| MAP3K14   | 9020   | 4468  | 1.41807771  | 0.648349351 | 1.560518605 | 0.634289186 |
| TEC       | 7006   | 3620  | 1.75026829  | 1.046451834 | 3.151761634 | 1.286150234 |
| WDR83     | 84292  | 1476  | 4.292663421 | 4.680090262 | 6.727902293 | 1.920056966 |
| ESRG      | 790952 | 3153  | 2.009505617 | 3.53366135  | 2.412385477 | 2.439675481 |
| ZBTB42    | 1E+08  | 3651  | 1.735407069 | 0.671366621 | 1.215278003 | 1.607898391 |
| CCDC134   | 79879  | 1279  | 4.953847701 | 2.787586361 | 4.955858359 | 2.532339177 |
| LOC100133 | 1E+08  | 4614  | 1.373205724 | 3.86359228  | 1.602723591 | 4.606638624 |
| IQCG      | 84223  | 2273  | 2.787492833 | 3.529246217 | 2.695670075 | 3.295146471 |
| FLJ10661  | 286042 | 1643  | 3.856342793 | 3.255011828 | 3.343520265 | 1.971309682 |
| TLCD2     | 727910 | 5901  | 1.07371144  | 1.359426648 | 0.895122697 | 1.3721665   |
| PLD2      | 5338   | 3489  | 1.815984869 | 0.638672069 | 2.240623723 | 1.856613246 |
| LOC389834 | 389834 | 8205  | 0.772208557 | 1.059168154 | 0.798272712 | 0.912841917 |
| CCDC126   | 90693  | 2473  | 2.562058718 | 2.252655527 | 2.733971841 | 2.37381198  |
| CCDC106   | 29903  | 1993  | 3.179112498 | 3.689653084 | 3.498443113 | 1.320409041 |
| SPATA7    | 55812  | 2031  | 3.119631319 | 2.304030714 | 1.872538505 | 1.395373748 |
| PPP1R16B  | 26051  | 6251  | 1.013593219 | 0.998130727 | 1.014004614 | 3.270727109 |
| SPDYE6    | 729597 | 3145  | 2.014617237 | 2.479854997 | 1.948253761 | 2.960803719 |
| CD9       | 928    | 1321  | 4.796344595 | 1.349478787 | 10.39629787 | 1.838869308 |
| ZNF546    | 339327 | 4636  | 1.366689217 | 1.29777448  | 0.820346356 | 0.698632832 |
| THBD      | 7056   | 4048  | 1.565210279 | 2.201903999 | 0.99170219  | 1.650235296 |
| FGF5      | 2250   | 5399  | 1.173545325 | 1.650918205 | 1.487094079 | 1.6122321   |
| CAMKK1    | 84254  | 3583  | 1.768342509 | 7.711764697 | 1.002467469 | 4.576259531 |
| FKBP7     | 51661  | 2904  | 2.181808268 | 1.611393381 | 2.83750196  | 0.627362179 |
| PTX3      | 5806   | 1955  | 3.240905989 | 0.341942739 | 2.053406888 | 0.724809228 |
| STARD10   | 10809  | 1988  | 3.187108254 | 3.250577393 | 3.188401831 | 3.258412281 |
| ZNF595    | 152687 | 2894  | 2.189347343 | 15.09164002 | 3.212346061 | 11.40148744 |
| SWI5      | 375757 | 1004  | 6.310728296 | 4.438898102 | 4.208859788 | 2.621090855 |
| APOBEC3D  | 140564 | 2519  | 2.515272413 | 2.919205477 | 1.677528871 | 8.839688339 |
| DISP1     | 84976  | 4945  | 1.281288414 | 1.216679977 | 0.640904231 | 1.064337803 |
| BTN2A2    | 10385  | 3621  | 1.749784924 | 2.030786688 | 1.983894473 | 5.814029756 |
| TMEM86B   | 255043 | 1751  | 3.61848727  | 3.563286792 | 2.413303956 | 2.080936341 |
| SLC16A7   | 9194   | 3575  | 1.772299639 | 2.243909553 | 2.068522139 | 0.396364207 |
| TMEM229   | 161145 | 4068  | 1.557515047 | 1.807639773 | 1.038764805 | 9.305358253 |
| MAP3K12   | 7786   | 3640  | 1.740651431 | 1.346790952 | 0.928724226 | 1.44592045  |
| IDUA      | 3425   | 2203  | 2.876065007 | 7.181625337 | 2.205878126 | 7.075361983 |
| ZNF124    | 7678   | 1674  | 3.784929038 | 5.457670295 | 4.796189326 | 6.529963321 |



|          |          |      |             |             |             |             |
|----------|----------|------|-------------|-------------|-------------|-------------|
| ZNF653   | 115950   | 2255 | 2.80974333  | 2.865697498 | 2.061314745 | 1.705609045 |
| MKRN3    | 7681     | 2744 | 2.309027409 | 2.192595659 | 2.001969313 | 1.327886127 |
| HMX3     | 340784   | 1074 | 5.709110839 | 14.93850401 | 4.918174147 | 17.15179379 |
| ZFH2     | 85446    | 9188 | 0.667347088 | 1.382396934 | 0.827846257 | 3.635259293 |
| SYTL3    | 94120    | 2896 | 2.117260028 | 0.69250489  | 2.845340364 | 8.45783578  |
| ZNF597   | 146434   | 1838 | 3.336009272 | 3.394621966 | 1.954211612 | 4.51555135  |
| LRP12    | 29967    | 4149 | 1.477846479 | 0.537075644 | 0.356469831 | 0.487897958 |
| ANKRD58  | 347454   | 1607 | 3.81554763  | 8.458490211 | 2.10364417  | 7.558016041 |
| PTK7     | 5754     | 4249 | 1.443065437 | 0.104887119 | 1.79012742  | 0.142924591 |
| FAM110A  | 83541    | 1811 | 3.385745467 | 7.874816026 | 3.500023656 | 5.588869767 |
| GOLGA8IP | 283796   | 1899 | 3.228849416 | 5.515079612 | 4.450442577 | 1.918756995 |
| LYSMD4   | 145748   | 2929 | 2.093405613 | 1.369405369 | 1.659115572 | 1.174902926 |
| KCTD6    | 200845   | 1840 | 3.332383175 | 2.785408559 | 4.248660962 | 1.760250982 |
| POLR2J4  | 84820    | 6486 | 0.945356929 | 0.96196657  | 1.498473485 | 0.967513838 |
| CSRNP1   | 64651    | 3188 | 1.923332823 | 7.618808857 | 4.37415127  | 33.84397238 |
| TP73-AS1 | 57212    | 6409 | 0.956714783 | 0.660605556 | 0.824172107 | 0.473776399 |
| CGNL1    | 84952    | 7235 | 0.847489294 | 0.431189715 | 0.43804719  | 0.475644875 |
| DPH3P1   | 1E+08    | 1068 | 5.741184496 | 1.669158687 | 3.165314777 | 0.379080268 |
| BATF     | 10538    | 953  | 6.433982205 | 13.32787306 | 7.09455652  | 11.04543638 |
| ZNF813   | 126017   | 4188 | 1.464084298 | 1.010941024 | 1.059450809 | 0.435019046 |
| ANKRD39  | 51239    | 914  | 6.708517551 | 4.144590416 | 5.77912367  | 3.322136701 |
| LOC10050 | 1.01E+08 | 1498 | 4.093180935 | 11.30526304 | 3.667158742 | 10.54035468 |
| NUDT7    | 283927   | 1103 | 5.55900729  | 1.616193543 | 2.490210243 | -           |
| SUV420H2 | 84787    | 2318 | 2.645204936 | 2.114891745 | 2.187590282 | 1.309936559 |
| MYLK3    | 91807    | 7998 | 0.76663979  | 0.696526271 | 0.924601981 | 0.632748384 |
| EPOR     | 2057     | 2709 | 2.263412714 | 1.645128717 | 2.495796369 | 2.241737131 |
| C10orf95 | 79946    | 1469 | 4.173985733 | 3.337181119 | 2.445092541 | 5.374217601 |
| AGAP5    | 729092   | 2426 | 2.527446431 | 1.653334017 | 2.351479207 | 1.418503986 |
| PCOLCE2  | 26577    | 2047 | 2.995400606 | 1.850588979 | 1.754685365 | 3.263386652 |
| SMPDL3B  | 27293    | 1890 | 3.24422489  | 3.772828525 | 4.695216919 | 3.427366992 |
| BMP8A    | 353500   | 5642 | 1.086775087 | 0.868897388 | 1.160905282 | 0.681699468 |
| MAFF     | 23764    | 2476 | 2.476407529 | 4.589849322 | 2.730659274 | 18.55870432 |
| MCOLN1   | 57192    | 2118 | 2.894988216 | 8.62713888  | 3.890512603 | 30.29742661 |
| SLC27A5  | 10998    | 2378 | 2.578463011 | 1.405588844 | 2.665493205 | 0.085125678 |
| PPARG    | 5468     | 1919 | 3.195198041 | 1.393430024 | 3.413146223 | 11.07609724 |
| PSTK     | 118672   | 1730 | 3.54426881  | 3.348930522 | 2.564728317 | 1.287119938 |
| LOC10028 | 1E+08    | 1238 | 4.952815058 | 7.379757734 | 6.143983368 | 5.886461281 |
| C17orf57 | 124989   | 3964 | 1.546817619 | 1.573994746 | 2.078735039 | 0.970269525 |
| BIN1     | 274      | 2637 | 2.325212378 | 0.253507036 | 2.163325202 | 0.537353827 |
| CDCP1    | 64866    | 6017 | 1.01904355  | 0.370338515 | 0.316031719 | 0.706499272 |
| LOC10013 | 1E+08    | 1312 | 4.673464208 | 5.944469486 | 2.89872386  | 4.011547589 |
| C11orf61 | 79684    | 2252 | 2.722728704 | 1.286334326 | 3.28373297  | 1.977546619 |
| ICAM4    | 3386     | 1420 | 4.318017635 | 10.04316326 | 7.588396359 | 12.11722067 |
| GKAP1    | 80318    | 1891 | 3.242509276 | 2.592447945 | 3.240221089 | 1.605728686 |
| THBS2    | 7058     | 5826 | 1.052451947 | 1.376926991 | 1.41436761  | 2.188983585 |
| MAR9     | 92979    | 2462 | 2.490489456 | 1.991193771 | 3.432733735 | 0.9044344   |
| RHBDF2   | 79651    | 3615 | 1.696150772 | 8.568117062 | 1.578060458 | 44.23756618 |
| APBA2    | 321      | 3653 | 1.678506718 | 1.341998101 | 2.197870499 | 0.997459494 |
| NSUN5P2  | 260294   | 1784 | 3.436987131 | 3.247561549 | 1.894930595 | 1.58856731  |
| CD3EAP   | 10849    | 3286 | 1.865972319 | 1.559693168 | 2.571938665 | 1.416878834 |
| CHCHD6   | 84303    | 984  | 6.231285611 | 4.529119609 | 5.368007148 | 1.645763113 |
| FAM161B  | 145483   | 3602 | 1.70227236  | 1.360999185 | 1.290467726 | 0.84298527  |
| TIGD5    | 84948    | 2412 | 2.542116518 | 2.679165778 | 2.803114579 | 1.174960233 |
| MAP6D1   | 79929    | 2154 | 2.751717211 | 1.137957072 | 2.550326739 | 1.315693631 |
| TRIM16   | 10626    | 2920 | 2.029862628 | 0.763125633 | 2.387807235 | 0.623924578 |
| MAGI1    | 9223     | 7235 | 0.819239651 | 0.277193388 | 0.204422022 | -           |
| RAB37    | 326624   | 3091 | 1.917566766 | 8.795078466 | 4.579773216 | 4.191344946 |
| BCAS3    | 54828    | 3626 | 1.63463841  | 1.536353315 | 1.922889444 | 2.735525175 |
| LOC10050 | 1.01E+08 | 4800 | 1.234833099 | 1.485551232 | 1.716688686 | 1.560389152 |
| HOTTIP   | 1E+08    | 3772 | 1.571367676 | 3.780830282 | 1.960489567 | 2.414978482 |
| ATP10D   | 57205    | 6550 | 0.904915859 | 2.993782635 | 0.99997368  | 6.737327042 |
| ARVCF    | 421      | 4056 | 1.461340945 | 0.494451224 | 1.093929977 | 0.249542484 |

|           |        |       |             |             |             |             |
|-----------|--------|-------|-------------|-------------|-------------|-------------|
| CDKL1     | 8814   | 1177  | 5.035852908 | 3.786451737 | 3.410714075 | 10.14724122 |
| C5orf65   | 389333 | 3251  | 1.823192517 | 1.987741574 | 1.884730261 | 2.615199091 |
| CREM      | 1390   | 2687  | 2.205879744 | 1.990317988 | 2.437598661 | 8.060993054 |
| SAP25     | 1E+08  | 841   | 7.047798898 | 9.538616707 | 5.778299062 | 4.573303682 |
| LOC38964  | 389641 | 1970  | 3.008730393 | 6.560556201 | 3.646539029 | 4.11023072  |
| LOC96610  | 96610  | 2011  | 2.947388798 | 3.767434749 | 3.572193877 | 3.221145507 |
| LOC401588 | 401588 | 1927  | 3.075868642 | 3.237838699 | 2.083243625 | 1.68077935  |
| C1orf74   | 148304 | 1642  | 3.609743528 | 2.30703754  | 3.860257516 | 1.479382677 |
| LOC285074 | 285074 | 2225  | 2.663909606 | 2.40358851  | 2.373986083 | 1.910564549 |
| FBN1      | 2200   | 11695 | 0.506814782 | 2.248333202 | 0.234861214 | 2.786750486 |
| TK2       | 7084   | 5114  | 1.15901425  | 4.488026306 | 1.941803634 | 3.602077929 |
| LOC61920  | 619207 | 4918  | 1.205205139 | 1.540526897 | 1.116999552 | 1.975718874 |
| TRIM45    | 80263  | 3581  | 1.655179803 | 1.49343324  | 1.888051484 | 0.33917151  |
| ZNF701    | 55762  | 5538  | 1.070277875 | 1.40829613  | 0.724884519 | 1.717976988 |
| COL7A1    | 1294   | 9169  | 0.646438965 | 0.850599189 | 0.82956172  | 0.971411274 |
| MATL2963  | 283314 | 5402  | 1.097223042 | 3.588752975 | 1.016920362 | 4.609172555 |
| LOC64647  | 646471 | 3653  | 1.622556494 | 2.378996634 | 2.140031801 | 2.936964067 |
| POU6F1    | 5463   | 5173  | 1.145795259 | 0.559989349 | 1.429531538 | 0.547845367 |
| MAR8      | 220972 | 2604  | 2.276190043 | 2.396050374 | 2.434156237 | 4.042358246 |
| CHRD      | 8646   | 3547  | 1.671045637 | 1.696217222 | 1.906149525 | 0.798986208 |
| ST6GALNA  | 27090  | 1717  | 3.452066903 | 3.114725937 | 2.09192833  | 1.886349334 |
| CYB561D2  | 11068  | 1243  | 4.768462489 | 8.425692826 | 6.119269034 | 4.885652364 |
| SNN       | 8303   | 3307  | 1.792318982 | 11.65710749 | 2.044485142 | 14.6297243  |
| FBXL19-AS | 283932 | 3951  | 1.500176885 | 1.861168969 | 1.657764516 | 1.434575592 |
| CDK18     | 5129   | 3212  | 1.845329662 | 5.896879889 | 1.578715527 | 25.58720995 |
| IL1RN     | 3557   | 1973  | 3.004155536 | 0.564705232 | 1.177968766 | 38.57742142 |
| C6orf64   | 55776  | 1920  | 3.087082746 | 3.945995459 | 2.53101537  | 2.846655885 |
| ZNF488    | 118738 | 3513  | 1.68721858  | 0.126861762 | 0.541293155 | 0.05762279  |
| TIAM1     | 7074   | 7218  | 0.821169143 | 0.185230827 | 0.058543852 | -           |
| ZFP41     | 286128 | 4786  | 1.195740223 | 0.83806693  | 1.500978246 | 0.507552519 |
| SMN2      | 6607   | 1634  | 3.502333357 | 3.000195266 | 5.30151482  | 1.61051115  |
| ATG10     | 83734  | 2432  | 2.353130224 | 2.015756194 | 1.390031325 | 1.747946596 |
| TMEM182   | 130827 | 3588  | 1.594986819 | 1.676834584 | 1.236616496 | 1.297620916 |
| PGBD2     | 267002 | 2712  | 2.110181676 | 2.464963327 | 1.94768401  | 0.746419111 |
| C12orf76  | 400073 | 1946  | 2.940808173 | 2.8627015   | 4.017233387 | 4.264945211 |
| PPP2R5B   | 5526   | 2766  | 2.068985071 | 6.928275809 | 2.673523734 | 11.12407345 |
| TPM1      | 7168   | 1797  | 3.184648139 | 2.356049533 | 3.762444276 | 2.140316303 |
| ARHGEF10  | 9639   | 5595  | 1.022844094 | 0.358443997 | 0.490920804 | 0.07236063  |
| PGBD4     | 161779 | 2318  | 2.46885794  | 2.307154631 | 1.822991901 | 0.523974624 |
| C17orf69  | 147081 | 2477  | 2.310380583 | 1.709253537 | 1.279479782 | 1.71619141  |
| HSCB      | 150274 | 1106  | 5.174333368 | 5.03690517  | 4.011735975 | 6.222948771 |
| SLC38A7   | 55238  | 2773  | 2.063762245 | 0.883937805 | 1.295290639 | 3.065997924 |
| AMZ2P1    | 201283 | 3442  | 1.662641692 | 2.848529381 | 1.350454605 | 2.822947537 |
| ZNF354B   | 117608 | 2200  | 2.601278502 | 1.01287584  | 1.82473203  | 0.828118076 |
| NBR2      | 10230  | 1371  | 4.174188698 | 4.388389853 | 3.698639149 | 5.906020801 |
| CLEC4D    | 338339 | 1973  | 2.900563966 | 0.564705232 | 0.428352278 | 2.462388602 |
| CAMKMT    | 79823  | 1611  | 3.552335633 | 4.011264964 | 5.114901113 | 1.63350417  |
| COMMD5    | 28991  | 1475  | 3.87987302  | 5.136482225 | 4.154073274 | 5.489596284 |
| ROPN1L    | 83853  | 1093  | 5.235876217 | 6.320048698 | 2.899607887 | 1.111228891 |
| C7orf74   | 168455 | 4426  | 1.292998804 | 2.769046015 | 2.38685903  | 9.238732561 |
| CAMK1D    | 57118  | 2242  | 2.55254804  | 1.292071767 | 3.863815886 | 2.889261202 |
| CPEB3     | 22849  | 5877  | 0.973764285 | 1.175397861 | 0.503315749 | 3.375536595 |
| CTH       | 1491   | 2140  | 2.674211544 | 0.728891959 | 1.974623938 | 0.662150486 |
| SP140     | 11262  | 3270  | 1.750095629 | 2.385059317 | 2.649136152 | 91.99060867 |
| WDR31     | 114987 | 2508  | 2.281823248 | 1.6881264   | 0.842443227 | 0.807132627 |
| TIRAP     | 114609 | 2348  | 2.437313759 | 4.840062573 | 2.789534754 | 9.742104563 |
| ZNF283    | 284349 | 2565  | 2.231116064 | 2.432481549 | 1.565072306 | 1.736231963 |
| MDK       | 4192   | 997   | 5.740032804 | 38.44254942 | 3.60264889  | 78.1696211  |
| NCF2      | 4688   | 2429  | 2.356036519 | 27.98022596 | 5.045086932 | 128.7577576 |
| LRRC37A3  | 374819 | 5665  | 1.010205244 | 1.612734347 | 0.969709408 | 1.607996264 |
| C11orf63  | 79864  | 2929  | 1.953845239 | 1.825873825 | 0.937760976 | 2.764477473 |
| H19       | 283120 | 2322  | 2.464604955 | 15.45050054 | 3.912680766 | 18.48187724 |

|           |        |       |             |             |             |             |
|-----------|--------|-------|-------------|-------------|-------------|-------------|
| PAN3-AS1  | 1E+08  | 2211  | 2.588336818 | 2.418807975 | 1.624532313 | 1.922662199 |
| STK19     | 8859   | 1805  | 3.170533355 | 3.333231295 | 2.926381736 | 3.140170727 |
| SIPA1L2   | 57568  | 6501  | 0.880297294 | 0.171383391 | 0.390004174 | 0.435933561 |
| LOC38764  | 387647 | 2095  | 2.731652843 | 1.80818885  | 1.91618638  | 0.676373289 |
| EBF4      | 57593  | 2931  | 1.952512011 | 0.22807849  | 1.585897219 | 0.207194333 |
| PLCL2     | 23228  | 4170  | 1.372377148 | 2.618417638 | 1.064023978 | 2.91264551  |
| PIR       | 8544   | 1576  | 3.631226336 | 2.827825948 | 2.815342632 | 3.33956246  |
| NANP      | 140838 | 3806  | 1.503629192 | 1.580788883 | 1.776435198 | 1.010548712 |
| SYNJ2     | 8871   | 7416  | 0.771684561 | 0.961521833 | 1.45301009  | 0.95536815  |
| RGP1      | 9827   | 1717  | 3.333030114 | 3.763627174 | 3.076365192 | 3.419008169 |
| PKIG      | 11142  | 1458  | 3.925111595 | 3.209524266 | 5.36182179  | 1.527241079 |
| F8        | 2157   | 9048  | 0.632494773 | 0.640323807 | 0.607140119 | 0.671183233 |
| MYBL1     | 4603   | 5188  | 1.063690543 | 1.288546751 | 1.099593014 | 0.351168035 |
| EEF1A1P9  | 441032 | 1645  | 3.354666588 | 2.844672571 | 5.266063961 | 1.107513536 |
| HLA-DOB   | 3112   | 1388  | 3.975811626 | 3.692472442 | 3.653338813 | 11.95905386 |
| SH2D3C    | 10044  | 3165  | 1.743578685 | 15.77078085 | 1.668915967 | 29.29302345 |
| NPHP3     | 27031  | 5418  | 1.018535721 | 0.616923269 | 1.169904548 | 0.784607996 |
| KIF9      | 64147  | 3603  | 1.53161991  | 1.298775015 | 1.641957624 | 0.449467362 |
| LPAR4     | 2846   | 2627  | 2.100657228 | 0.593768098 | 1.68899124  | 0.308228189 |
| TEKT2     | 27285  | 1536  | 3.59272561  | 5.222641049 | 2.888658847 | 2.899371735 |
| TMEM64    | 169200 | 4819  | 1.145139352 | 0.277442645 | 1.139946834 | 0.168025618 |
| FUK       | 197258 | 3923  | 1.406685327 | 2.442468887 | 3.016045536 | 1.909219457 |
| CD86      | 942    | 2790  | 1.977930658 | 2.236313682 | 3.635006647 | 48.61194917 |
| C1orf228  | 339541 | 1698  | 3.249956736 | 2.624648819 | 4.106240945 | 3.457265622 |
| SDR39U1   | 56948  | 1247  | 4.425362099 | 5.360850475 | 5.591336909 | 3.408986465 |
| OPRL1     | 4987   | 3391  | 1.627374384 | 1.445685363 | 1.495380204 | 1.432702068 |
| LRP5L     | 91355  | 3627  | 1.521485122 | 2.764673508 | 1.39807948  | 1.283668003 |
| KIF21A    | 55605  | 6653  | 0.829464383 | 0.36842921  | 0.476367266 | 0.060853408 |
| ZNF720    | 124411 | 2789  | 1.978639848 | 3.036085342 | 2.348450198 | 4.282288603 |
| FBXO16    | 157574 | 1292  | 4.27122797  | 1.379768946 | 2.616529552 | 2.193501611 |
| LIPT2     | 387787 | 960   | 5.748360976 | 3.481760699 | 5.72229562  | 4.006404579 |
| LINC00467 | 84791  | 797   | 6.923998165 | 9.506036739 | 9.808702849 | 8.635610214 |
| BPHL      | 670    | 1844  | 2.99263912  | 2.175156359 | 3.781126423 | 0.987993366 |
| KBTBD8    | 84541  | 4684  | 1.178144009 | 2.949535964 | 2.480926959 | 3.975972543 |
| FZD2      | 2535   | 3834  | 1.439339212 | 0.755562051 | 1.487920855 | 0.633580166 |
| WASH3P    | 374666 | 2590  | 2.130666617 | 2.236930426 | 2.202582454 | 1.797630829 |
| NBPF7     | 343505 | 1887  | 2.924444376 | 2.59794333  | 1.231654677 | 2.145509941 |
| KIFC2     | 90990  | 3309  | 1.667702187 | 1.077462362 | 2.490210243 | 0.550577143 |
| ZNF613    | 79898  | 2355  | 2.343280908 | 2.838632927 | 3.050395705 | 5.75912264  |
| ATF3      | 467    | 3187  | 1.731542685 | 0.978869654 | 1.524803737 | 10.35328041 |
| NBPF16    | 728936 | 3837  | 1.438213849 | 1.800316192 | 1.651952786 | 1.371683721 |
| ST5       | 6764   | 4571  | 1.207268986 | 0.38999376  | 0.878234624 | 1.417134897 |
| SDSL      | 113675 | 1414  | 3.902706179 | 6.303612015 | 3.4367394   | 19.32665948 |
| LIN37     | 55957  | 929   | 5.940179265 | 3.358081363 | 2.501757131 | 3.704295662 |
| ASGR2     | 433    | 1544  | 3.574110452 | 0.144321687 | 4.515801247 | 0.262213553 |
| DOC2A     | 8448   | 2089  | 2.641659424 | 2.56006914  | 1.415982125 | 1.4535342   |
| RYR2      | 6262   | 16365 | 0.337209077 | 0.340410456 | 0.051643083 | 0.024739244 |
| CPEB2     | 132864 | 6878  | 0.802330116 | 1.004334578 | 1.413070518 | 5.621388896 |
| CACNA2D1  | 781    | 3822  | 1.44385833  | 0.349815832 | 0.386968427 | -           |
| LOC33881  | 338817 | 3684  | 1.497944228 | 1.81459841  | 1.548503951 | 2.527613381 |
| ITPKC     | 80271  | 3398  | 1.624021936 | 1.4427072   | 1.989732891 | 2.621209526 |
| PTPLA     | 9200   | 1323  | 4.171146287 | 0.33685969  | 4.471635161 | -           |
| C20orf108 | 116151 | 3066  | 1.799878192 | 1.235536739 | 1.860629014 | 0.792285178 |
| ABI3      | 51225  | 2129  | 2.592027495 | 2.40730472  | 2.778756843 | 3.89834823  |
| GDPD1     | 284161 | 3296  | 1.674279896 | 1.21692607  | 1.730791431 | 1.105497431 |
| LENG9     | 94059  | 1930  | 2.859288361 | 2.193689643 | 2.189479392 | 1.887937582 |
| LOC100129 | 1E+08  | 1542  | 3.578746133 | 6.50289936  | 4.247618419 | 9.189377696 |
| KLF7      | 8609   | 1639  | 3.366947247 | 2.991042748 | 2.836037065 | 2.47015086  |
| OXTR      | 5021   | 4361  | 1.26540393  | 0.56206364  | 1.501909563 | 0.185671968 |
| DPY19L2   | 283417 | 4064  | 1.357880546 | 1.041786666 | 0.987797851 | 0.099620503 |
| IMMP2L    | 83943  | 1539  | 3.585722246 | 2.461439663 | 4.118611333 | 0.394598173 |
| SERAC1    | 84947  | 3969  | 1.390382096 | 0.786005943 | 1.171142542 | 1.0200497   |

|           |        |       |             |             |             |             |
|-----------|--------|-------|-------------|-------------|-------------|-------------|
| MOCS3     | 27304  | 2458  | 2.245088095 | 3.172963371 | 4.211941947 | 3.541269775 |
| ZNF416    | 55659  | 2523  | 2.187247934 | 1.678089976 | 1.591125829 | 1.123267571 |
| RAD51B    | 5890   | 2650  | 2.082425108 | 2.354458556 | 2.551363156 | 2.062482755 |
| ZBTB16    | 7704   | 2417  | 2.283171923 | 0.092193912 | 4.895302704 | 0.167504231 |
| STOX1     | 219736 | 3396  | 1.564793984 | 1.246708189 | 1.990904701 | 1.192160559 |
| ADAM28    | 10863  | 3220  | 1.650323096 | 3.875351039 | 1.443560481 | 7.292468355 |
| C11orf9   | 745    | 5926  | 0.896733103 | 1.240884002 | 0.784384872 | 2.015407174 |
| ZNF471    | 57573  | 4967  | 1.069869211 | 1.884230473 | 1.573894941 | 2.200756714 |
| PPM1M     | 132160 | 2211  | 2.403455617 | 1.61253865  | 1.051167967 | 3.753769055 |
| ZNF585A   | 199704 | 4144  | 1.282345649 | 1.236764418 | 1.529571149 | 1.709703234 |
| SPAG1     | 6674   | 3958  | 1.342607471 | 1.294884222 | 1.121015662 | 1.176317294 |
| RFX3      | 5991   | 3275  | 1.622607746 | 2.381418005 | 2.06446179  | 5.192068546 |
| RPL21P28  | 1E+08  | 566   | 9.388763903 | 12.20461701 | 10.45224968 | 3.21883351  |
| ZNF775    | 285971 | 2275  | 2.33584192  | 6.072802837 | 1.393086339 | 1.95755384  |
| SENP8     | 123228 | 1834  | 2.897513833 | 1.336510105 | 2.995312866 | 1.434882889 |
| IKZF2     | 22807  | 9512  | 0.558666986 | 0.163985365 | 1.97690746  | 0.744849685 |
| WDR25     | 79446  | 2121  | 2.505441004 | 1.470842804 | 1.793081426 | 2.195126755 |
| DMWD      | 1762   | 3308  | 1.60642091  | 0.13472351  | 1.596771171 | 0.183581194 |
| PPM1L     | 151742 | 3056  | 1.738887555 | 1.385412634 | 1.451891358 | 0.927357356 |
| LOC39981  | 399815 | 2112  | 2.516117599 | 1.1605869   | 1.100441465 | 0.766775996 |
| FAM69A    | 388650 | 2599  | 2.044648084 | 1.200329968 | 1.951071286 | 1.090420962 |
| ARAP2     | 116984 | 7375  | 0.720547847 | 0.997081844 | 1.260546373 | 4.583812897 |
| ZNF296    | 162979 | 1604  | 3.312992749 | 0.972461841 | 5.400670334 | 3.659873457 |
| LOC28392  | 283922 | 2371  | 2.241265445 | 2.255581794 | 2.138690119 | 1.963670961 |
| SH2B2     | 10603  | 2157  | 2.463625577 | 1.446294662 | 2.938591952 | 5.443149769 |
| NFKBID    | 84807  | 1834  | 2.897513833 | 4.009530314 | 3.340925888 | 4.635775488 |
| C8orf58   | 541565 | 2062  | 2.57712918  | 2.701657186 | 2.766580289 | 1.472566898 |
| NLGN3     | 54413  | 3995  | 1.330172808 | 1.227113658 | 1.057745989 | 1.520116618 |
| PQLC3     | 130814 | 1812  | 2.93269336  | 3.443330669 | 4.31431356  | 2.122598453 |
| TLR1      | 7096   | 2867  | 1.853519487 | 3.186655066 | 3.832161699 | 33.11445299 |
| PCNXL2    | 80003  | 6817  | 0.779527706 | 0.817194824 | 0.526894667 | 0.564199559 |
| FBXW9     | 84261  | 1750  | 3.036594497 | 4.329320732 | 3.501290331 | 1.272409996 |
| C19orf38  | 255809 | 1089  | 4.879743222 | 13.91425396 | 11.058982   | 81.04589922 |
| LPO       | 4025   | 2993  | 1.775489599 | 1.712379468 | 2.047196151 | 0.473438704 |
| ASMTL-AS  | 80161  | 2319  | 2.291522367 | 4.32404951  | 2.824418975 | 3.928115064 |
| EMX2OS    | 196047 | 7282  | 0.729750119 | 0.703811006 | 0.725366525 | 0.722761664 |
| JUB       | 84962  | 4236  | 1.254494894 | 0.789067581 | 0.847932234 | 0.669028348 |
| WHAMMP    | 440253 | 5246  | 1.012969952 | 1.486683943 | 1.288812879 | 1.427729304 |
| CDR2L     | 30850  | 3546  | 1.498601345 | 0.251362307 | 2.204606929 | 0.057086538 |
| EPM2A     | 7957   | 3474  | 1.52966044  | 0.96214458  | 1.702928416 | 0.640966463 |
| RIMS3     | 9783   | 7233  | 0.734693816 | 0.092423345 | 0.671858083 | 0.419802702 |
| CLMN      | 79789  | 12750 | 0.41678748  | 0.36701854  | 0.34799843  | 0.523933528 |
| SMPD1     | 6609   | 2482  | 2.141031575 | 4.48897431  | 2.979438617 | 8.074318063 |
| LOC72875  | 728752 | 1414  | 3.758161506 | 5.200479913 | 3.586162852 | 7.014861588 |
| CC2D2A    | 57545  | 5257  | 1.010850365 | 1.1020829   | 1.16554272  | 1.001169952 |
| LOC151174 | 151174 | 1977  | 2.687931396 | 1.577975512 | 2.137428036 | 0.204783878 |
| ZNF420    | 147923 | 2990  | 1.777271026 | 1.117889723 | 1.907922594 | 0.947827452 |
| LAMB3     | 3914   | 4339  | 1.224715457 | 70.30604872 | 1.217358616 | 362.0766088 |
| NMB       | 4828   | 1046  | 5.080344521 | 3.834596869 | 4.847833913 | 3.28995284  |
| FOXO3B    | 2310   | 7259  | 0.732062318 | 0.675343582 | 0.756771428 | 0.334639255 |
| ABCC9     | 10060  | 8325  | 0.638323167 | 0.910067421 | 1.015182037 | 0.899683835 |
| NTN1      | 9423   | 5954  | 0.892516018 | 0.224554267 | 1.029099442 | 0.27199041  |
| ETHE1     | 23474  | 978   | 5.43357911  | 2.961988652 | 5.400939708 | 1.448877342 |
| SPNS3     | 201305 | 1915  | 2.774955806 | 0.930893722 | 4.302927255 | 0.634241868 |
| ZNF699    | 374879 | 2094  | 2.537746117 | 1.383392981 | 2.118901618 | 2.126759783 |
| FBXO36    | 130888 | 2832  | 1.876426684 | 1.416309437 | 1.41751782  | 0.571832946 |
| PRDM1     | 639    | 5165  | 1.028855831 | 1.337427537 | 5.154284595 | 11.64014953 |
| DERL3     | 91319  | 3216  | 1.652375737 | 0.970042782 | 0.919771971 | 0.125888596 |
| PRSS53    | 339105 | 2028  | 2.620335488 | 0.659268298 | 0.937654266 | 1.197803923 |
| ACYP2     | 98     | 1238  | 4.127345881 | 6.479787278 | 3.583990298 | 4.741871588 |
| FDPSL2A   | 619190 | 4981  | 1.02582899  | 1.431569145 | 1.018035389 | 1.13792575  |
| TMEM186   | 25880  | 1465  | 3.487818567 | 3.65050132  | 2.884433602 | 1.934473776 |

|           |        |       |             |             |             |             |
|-----------|--------|-------|-------------|-------------|-------------|-------------|
| GBAP1     | 2630   | 2036  | 2.50965334  | 2.517265103 | 1.245293289 | 0.994247853 |
| CCDC62    | 84660  | 3228  | 1.582916419 | 0.552249528 | 0.589083907 | 0.68981335  |
| CCBL1     | 883    | 1936  | 2.639284195 | 1.2660948   | 4.583657013 | 0.418241452 |
| TMEM14A   | 28978  | 1015  | 5.03414207  | 6.586187726 | 5.412220488 | 3.988746068 |
| LIME1     | 54923  | 1206  | 4.236860863 | 6.097411772 | 4.730255851 | 3.189177775 |
| RANGRF    | 29098  | 1166  | 4.38220772  | 4.204390278 | 6.342166936 | 3.819412509 |
| FRRS1     | 391059 | 2678  | 1.908011277 | 4.576474108 | 3.629237873 | 6.425113275 |
| FAM86FP   | 653113 | 2143  | 2.384346337 | 1.351761503 | 1.281708772 | 0.472302527 |
| ZNF382    | 84911  | 2830  | 1.80553152  | 1.732268221 | 1.717155304 | 1.072944503 |
| SLC38A6   | 145389 | 1947  | 2.624372985 | 2.975680433 | 1.627771659 | 3.119088797 |
| KLHL6     | 89857  | 6320  | 0.808489589 | 0.846200069 | 2.340179319 | 3.619376822 |
| ADCK2     | 90956  | 2376  | 2.150527862 | 1.7819112   | 2.934510574 | 1.022367995 |
| TMEM102   | 284114 | 1996  | 2.559946995 | 5.916899946 | 3.916601288 | 4.462359704 |
| SDHAF1    | 644096 | 1147  | 4.45479878  | 4.662584511 | 5.34198612  | 2.470796932 |
| GSG1      | 83445  | 2761  | 1.850653459 | 1.856266479 | 1.530494468 | 2.052882348 |
| MMP24     | 10893  | 4344  | 1.176255571 | 2.103163001 | 1.167319124 | 2.003784785 |
| GATS      | 352954 | 4074  | 1.254210653 | 1.258014666 | 1.2965437   | 1.490639639 |
| THOC3     | 84321  | 1842  | 2.773970793 | 2.540437774 | 2.638191917 | 0.769273638 |
| RBM44     | 375316 | 4293  | 1.190229257 | 1.038121056 | 0.639809433 | 0.707298613 |
| LINC00152 | 112597 | 828   | 6.171079953 | 5.920675198 | 3.827622488 | 8.801254911 |
| LNX1      | 84708  | 3170  | 1.611878297 | 1.054413335 | 0.866467476 | 0.447003798 |
| MED31     | 51003  | 1656  | 3.085539977 | 2.825776799 | 5.358671484 | 2.567032682 |
| TEAD3     | 7005   | 3023  | 1.690259412 | 1.76909839  | 2.236557183 | 1.205332297 |
| FDXR      | 2232   | 1936  | 2.639284195 | 1.496293854 | 3.055771342 | 1.777526173 |
| C1orf50   | 79078  | 1020  | 5.009464903 | 6.335439076 | 6.214257687 | 6.946088435 |
| MORN2     | 729967 | 750   | 6.812872268 | 3.565322956 | 6.479399348 | 2.429146355 |
| ZNF57     | 126295 | 2016  | 2.534550695 | 1.5474492   | 1.886471084 | 0.803289139 |
| COL9A2    | 1298   | 2831  | 1.804893748 | 9.524109804 | 3.209199837 | 25.16953718 |
| LOC44030  | 440300 | 7771  | 0.657528529 | 0.802897333 | 0.516588659 | 0.599133168 |
| BTG2      | 7832   | 2718  | 1.879931641 | 18.36443024 | 10.18333471 | 46.54821168 |
| MT1F      | 4494   | 456   | 11.20538202 | 5.86401802  | 15.75368835 | 27.07929965 |
| UPK3BL    | 1E+08  | 1360  | 3.757098677 | 3.113103684 | 3.262485286 | 3.4234293   |
| RASL11A   | 387496 | 1543  | 3.311506287 | 0.722076101 | 6.435763956 | 0.262383491 |
| TNFRSF12A | 51330  | 1048  | 4.875624238 | 3.402025721 | 5.645012708 | 8.885236351 |
| NSUN5P1   | 155400 | 1751  | 2.918134895 | 3.181506064 | 3.378625539 | 2.31215149  |
| LOC44043  | 440434 | 1652  | 3.093011018 | 4.181485004 | 3.708993995 | 2.940855152 |
| PGAP3     | 93210  | 2708  | 1.886873782 | 2.468604336 | 1.872538505 | 3.139590932 |
| XYLB      | 9942   | 3683  | 1.387361988 | 0.907545553 | 0.917881125 | 0.274815182 |
| ZNF718    | 255403 | 2149  | 2.377689251 | 1.34798739  | 2.162989646 | 0.94196772  |
| DLX1      | 1745   | 2403  | 2.126364628 | 1.669158687 | 1.318881157 | 0.673920476 |
| INO80C    | 125476 | 1095  | 4.666350869 | 5.901504893 | 5.209761239 | 5.915729328 |
| RCOR2     | 283248 | 2621  | 1.949505609 | 1.105236513 | 0.967347248 | 0.231700339 |
| JMJD5     | 79831  | 2531  | 2.018828211 | 1.936909942 | 2.504363035 | 0.639838366 |
| ACYP1     | 97     | 700   | 7.299506002 | 7.321645356 | 8.753225828 | 3.759393169 |
| ENDOG     | 2021   | 1145  | 4.462580088 | 5.643797255 | 6.827542507 | 2.121525201 |
| RBP4      | 5950   | 941   | 5.21282469  | 2.368041283 | 1.79625727  | 6.453630062 |
| FOXD2     | 2306   | 4675  | 1.049255194 | 1.23928338  | 0.903892027 | 0.389702624 |
| C17orf103 | 256302 | 4787  | 1.024706086 | 2.513675575 | 0.971018331 | 3.340689403 |
| O3FAR1    | 338557 | 3657  | 1.341336624 | 1.523329811 | 1.271059543 | 2.60162881  |
| MYO10     | 4651   | 11436 | 0.428932147 | 0.409189085 | 0.646639266 | 0.672638754 |
| TXNRD3    | 114112 | 2919  | 1.680461813 | 1.37409672  | 0.940973586 | 0.346743513 |
| PGAM4     | 441531 | 1678  | 2.923282499 | 4.780677384 | 2.644207383 | 4.825479451 |
| FUT2      | 2524   | 3099  | 1.582855125 | 1.869522363 | 1.499924088 | 1.567696906 |
| AGMAT     | 79814  | 2196  | 2.233728612 | 1.725025337 | 1.731842306 | 0.553084325 |
| ZNF232    | 7775   | 2125  | 2.308361427 | 0.943761959 | 3.181699936 | 1.238388338 |
| SLC24A4   | 123041 | 9773  | 0.501920396 | 1.938072056 | 0.454003887 | 4.701867583 |
| GCH1      | 2643   | 2941  | 1.667891205 | 4.394524215 | 0.862093552 | 29.73453546 |
| C16orf7   | 9605   | 2767  | 1.772774858 | 2.818628105 | 0.99266422  | 5.413710104 |
| RGL4      | 266747 | 2897  | 1.693223346 | 4.307431945 | 1.677442013 | 3.284141028 |
| SPTB      | 6710   | 10074 | 0.486923569 | 0.221195836 | 0.671144765 | 0.140659325 |
| TGFBR3    | 7049   | 6572  | 0.746388928 | 0.339063732 | 0.546536966 | 0.308017138 |
| METAP1D   | 254042 | 1550  | 3.164689054 | 2.875260448 | 3.953069729 | 0.914194865 |

|           |        |      |             |             |             |             |
|-----------|--------|------|-------------|-------------|-------------|-------------|
| IFI27L2   | 83982  | 469  | 10.45899367 | 13.77856686 | 9.91101226  | 17.69633983 |
| C11orf45  | 219833 | 3648 | 1.344645842 | 0.916252816 | 0.231671887 | 0.055490368 |
| FBP1      | 2203   | 1647 | 2.978304817 | 58.44791731 | 6.542515379 | 42.64894684 |
| CATSPER2  | 117155 | 1948 | 2.51810474  | 3.202933867 | 1.735398451 | 1.870492574 |
| C8orf37   | 157657 | 3378 | 1.452121975 | 1.121419669 | 1.188398599 | 0.659182206 |
| NEXN      | 91624  | 3405 | 1.440607352 | 2.617711421 | 0.744615899 | 84.00351934 |
| LIPT1     | 51601  | 1690 | 2.902525463 | 3.29634149  | 4.625761048 | 3.952752945 |
| DLX4      | 1748   | 2012 | 2.438005981 | 0.996766482 | 1.785209216 | 0.804886135 |
| LOC64383  | 643837 | 1543 | 3.179046036 | 1.732982642 | 3.4232787   | 0.918342217 |
| C14orf79  | 122616 | 1908 | 2.570895196 | 1.167886188 | 2.768406202 | 0.848758335 |
| ZNF484    | 83744  | 2969 | 1.652161682 | 1.576115318 | 1.138617778 | 1.772701393 |
| LOC100289 | 1E+08  | 1133 | 4.329451044 | 4.523523168 | 4.102616725 | 4.823988791 |
| MITF      | 4286   | 4815 | 1.018747255 | 0.231394273 | 1.316415959 | 0.882867315 |
| L3MBTL1   | 26013  | 3376 | 1.452982237 | 1.188088959 | 0.751012185 | 0.539650405 |
| ACCS      | 84680  | 2196 | 2.233728612 | 3.145634439 | 3.656111535 | 4.055951717 |
| LINC00116 | 205251 | 1652 | 2.969290577 | 4.046598391 | 3.58109765  | 1.960570101 |
| ZSCAN5A   | 79149  | 1938 | 2.531098056 | 1.494749691 | 3.379684005 | 1.77569178  |
| MYO7A     | 4647   | 7465 | 0.657102215 | 0.119401305 | 1.500079351 | 0.81351184  |
| LOH12CR1  | 118426 | 2085 | 2.352646539 | 2.030609597 | 1.621369871 | 1.262146388 |
| C14orf109 | 26175  | 1277 | 3.841243565 | 2.093964148 | 3.970896063 | 2.694824331 |
| PGCP      | 10404  | 1928 | 2.544226158 | 2.427119491 | 4.931438932 | 3.359815153 |
| SMN1      | 6606   | 1641 | 2.989194414 | 1.629489468 | 2.575073265 | 0.986856127 |
| LOC38772  | 387723 | 2686 | 1.826235306 | 1.244411866 | 1.101260856 | 0.52755102  |
| LPAR5     | 57121  | 2855 | 1.718132411 | 0.54634984  | 3.404237836 | 1.488968869 |
| EGR2      | 1959   | 2992 | 1.639461241 | 2.755618093 | 4.73130983  | 17.45543003 |
| ZNF576    | 79177  | 1899 | 2.583079533 | 3.050895104 | 2.559004482 | 2.025354606 |
| FPGT      | 8790   | 4499 | 1.090301852 | 1.584940189 | 1.314952949 | 1.394819905 |
| POU2F2    | 5452   | 3717 | 1.319684701 | 0.71939527  | 3.410569191 | 1.85164954  |
| NUAK1     | 9891   | 6821 | 0.719142066 | -           | 0.495610055 | -           |
| STAG3L3   | 442578 | 1272 | 3.856342793 | 8.408780556 | 4.484818048 | 4.296839072 |
| LOC72960  | 729603 | 3131 | 1.566677749 | 1.636905701 | 1.214668063 | 3.749879927 |
| ABCB11    | 8647   | 4775 | 0.984477877 | 2.099993888 | 0.973458586 | 1.865313083 |
| LOC64551  | 645513 | 1048 | 4.485574299 | 6.16617162  | 4.435367128 | 3.090516992 |
| MSL3P1    | 151507 | 1997 | 2.35397189  | 1.227420897 | 0.846408658 | 0.608198887 |
| IL1B      | 3553   | 1498 | 3.138105384 | 28.70941799 | 11.28356536 | 105.5386796 |
| ACRBP     | 84519  | 1886 | 2.492514244 | 2.953773658 | 1.792447604 | 1.609985654 |
| TLCD1     | 116238 | 1037 | 4.533155125 | 2.148820489 | 3.87117692  | 0.976031162 |
| TMEM107   | 84314  | 1776 | 2.646892942 | 3.638596767 | 2.617266188 | 1.025821941 |
| LOC64701  | 647012 | 1851 | 2.539644444 | 0.842695188 | 1.598047898 | 1.531066495 |
| PPP1R28   | 392617 | 3751 | 1.253234302 | 0.712874491 | 1.182879229 | 0.269833195 |
| PET117    | 1E+08  | 1174 | 4.004158318 | 0.949031877 | 2.699549762 | 1.724266294 |
| UNC5CL    | 222643 | 3128 | 1.502839471 | 1.353523341 | 1.68865698  | 0.647151096 |
| ACSM3     | 6296   | 2158 | 2.178351189 | 1.652142241 | 4.405845348 | 0.750431373 |
| RNF32     | 140545 | 1910 | 2.461194694 | 1.749994906 | 2.323026172 | 1.695739166 |
| ZBTB38    | 253461 | 8398 | 0.55976207  | 0.636816437 | 1.182470086 | 1.494473625 |
| RASGRP4   | 115727 | 3235 | 1.453131952 | 6.337127356 | 3.918728186 | 7.008356306 |
| STAG3L2   | 442582 | 1140 | 4.123580583 | 4.495747148 | 4.633437749 | 2.66353767  |
| NLRC4     | 58484  | 3385 | 1.388739103 | 6.253797652 | 1.310776954 | 13.33578624 |
| DNLZ      | 728489 | 724  | 6.492930753 | 3.385579464 | 4.961106275 | 3.634772401 |
| CGRRF1    | 10668  | 1323 | 3.553198689 | 1.179008914 | 3.353726371 | 4.89623856  |
| TRAPPC6A  | 79090  | 822  | 5.718834386 | 7.04823577  | 4.626673606 | 5.910331765 |
| GNB1L     | 54584  | 1537 | 3.058478767 | 1.594768726 | 2.474382371 | 1.317038796 |
| TBC1D16   | 125058 | 3303 | 1.423215823 | 0.674637253 | 0.959512994 | 0.551577283 |
| ELAC1     | 55520  | 2233 | 2.105186684 | 3.392884586 | 2.460100222 | 1.450453116 |
| ANKRD23   | 200539 | 2591 | 1.814311797 | 1.97805934  | 1.630912863 | 0.78127697  |
| RGAG4     | 340526 | 4354 | 1.079669698 | 0.665324966 | 1.746957145 | 3.951872612 |
| ATP2B3    | 492    | 6574 | 0.715071777 | 0.135584232 | 0.771346862 | 0.092377029 |
| NCF1      | 653361 | 1409 | 3.336324957 | 332.272158  | 16.34495315 | 665.0413106 |
| FAM81A    | 145773 | 3468 | 1.355502268 | 0.257015784 | 0.670165045 | 0.058370491 |
| IL11RA    | 3590   | 1776 | 2.646892942 | 3.011252497 | 2.260366253 | 1.481742803 |
| FCRLB     | 127943 | 1794 | 2.620335488 | 0.993679754 | 2.591005992 | 4.964810463 |
| GNRHR2    | 114814 | 6257 | 0.751299643 | 1.032786936 | 0.506516129 | 0.776457202 |

|           |          |       |             |             |             |             |
|-----------|----------|-------|-------------|-------------|-------------|-------------|
| LOC28402  | 284023   | 2525  | 1.861735392 | 2.206264205 | 2.259282597 | 1.683566781 |
| C22orf40  | 150383   | 1502  | 3.129748246 | 2.967146268 | 2.81337898  | 1.347728781 |
| SGK196    | 84197    | 1615  | 2.910762765 | 3.035491681 | 2.878182508 | 1.754801289 |
| SYNE2     | 23224    | 21882 | 0.214828711 | 0.325868107 | 0.299324906 | 1.165617253 |
| XKR8      | 55113    | 2179  | 2.157357441 | 2.249802232 | 1.939281885 | 1.857997824 |
| LOC72874  | 728743   | 3369  | 1.395334481 | 4.299235532 | 1.379716459 | 4.085830419 |
| C3orf39   | 84892    | 2556  | 1.839155659 | 1.133343076 | 1.487920855 | 0.475185124 |
| LOC100130 | 1E+08    | 1731  | 2.715702984 | 2.059689749 | 2.197068576 | 2.221922817 |
| ZNF432    | 9668     | 2593  | 1.812912405 | 0.77342621  | 1.385206688 | 2.26395566  |
| UST       | 10090    | 4396  | 1.069354382 | 0.608278484 | 0.817070278 | 1.381452659 |
| EBLN2     | 55096    | 1679  | 2.799810521 | 2.787067528 | 4.404387521 | 3.255258666 |
| PRAME     | 23532    | 2776  | 1.693401248 | 0.72244026  | 1.978891857 | 1.677184383 |
| RNF182    | 221687   | 3505  | 1.341193114 | 0.127151318 | 1.386462057 | 0.231017247 |
| AIG1      | 51390    | 1385  | 3.394138531 | 10.13607158 | 5.644430448 | 7.746375261 |
| LOC65036  | 650368   | 1477  | 3.182722996 | 2.112158149 | 1.71659928  | 1.918756995 |
| SNAPC5    | 10302    | 785   | 5.988384541 | 10.78680512 | 6.190508932 | 7.478263727 |
| ZKSCAN3   | 80317    | 2312  | 2.033253402 | 0.867428271 | 2.650198131 | 1.050668839 |
| DRP2      | 1821     | 7118  | 0.660421729 | 0.469582786 | 0.682712772 | 0.312829094 |
| PROCA1    | 147011   | 1263  | 3.721996726 | 4.940075355 | 4.684064385 | 2.564419483 |
| LOC728730 | 728730   | 2517  | 1.867652708 | 2.832994005 | 1.594918739 | 1.93019178  |
| MS4A2     | 2206     | 3658  | 1.229222443 | 0.487332279 | 0.231038558 | 0.166016017 |
| ZNF419    | 79744    | 2384  | 1.886113967 | 1.869401718 | 3.013289382 | 2.292608767 |
| KLHL25    | 64410    | 3683  | 1.220878549 | 0.302515184 | 1.089983835 | 0.109926073 |
| MVP       | 9961     | 2943  | 1.527861263 | 13.62891038 | 3.876784612 | 56.4709808  |
| ZNF461    | 92283    | 3192  | 1.408676597 | 0.907526598 | 0.860495582 | 0.761010763 |
| LRRC56    | 115399   | 2789  | 1.612225062 | 1.278351723 | 1.666642076 | 1.379042093 |
| FZD1      | 8321     | 4350  | 1.033677172 | 0.768388568 | 0.582854514 | 0.60495982  |
| ZNF550    | 162972   | 1146  | 3.923643715 | 2.916658177 | 3.134241661 | 2.826231944 |
| LOC100190 | 1E+08    | 1581  | 2.8440833   | 1.691329675 | 4.276478408 | 2.56076993  |
| PAQR6     | 79957    | 2117  | 2.123994188 | 2.841985115 | 1.497057827 | 3.059859997 |
| HSD17B7P  | 158160   | 1418  | 3.17101248  | 3.300060916 | 1.341017526 | 2.141349044 |
| LOC28596  | 285965   | 5034  | 0.893225208 | 1.018107221 | 1.049288644 | 0.723821918 |
| LOC28299  | 282997   | 2015  | 2.231511512 | 2.322325747 | 1.572839415 | 0.904148768 |
| LOC33879  | 338799   | 1521  | 2.956275935 | 6.006666716 | 2.917146607 | 3.460322444 |
| CA5BP1    | 340591   | 994   | 4.523637522 | 2.241777512 | 6.801923907 | 3.258412281 |
| CLEC4E    | 26253    | 2158  | 2.083640267 | 0.51629445  | 0.587446046 | 9.192784323 |
| ZNF44     | 51710    | 2818  | 1.595633675 | 5.377083947 | 1.799444383 | 3.950882705 |
| CPM       | 1368     | 6683  | 0.672825931 | 0.700207449 | 0.663920393 | 0.696672729 |
| LOC15476  | 154761   | 2579  | 1.743503566 | 0.172805494 | 0.983100867 | 1.098877116 |
| TSG1      | 643432   | 4798  | 0.93716042  | 1.021742198 | 1.100900174 | 1.898561658 |
| RAB3B     | 5865     | 12844 | 0.350085308 | 0.364332481 | 0.263201198 | 0.441296182 |
| ERN1      | 2081     | 4005  | 1.122720524 | 0.834579344 | 0.791328694 | 1.566865107 |
| PAR6G     | 84552    | 3847  | 1.168831738 | 1.100551341 | 1.043517147 | 0.894538776 |
| C20orf196 | 149840   | 1203  | 3.737735409 | 1.667077442 | 3.688262667 | 2.355780616 |
| CTTN      | 2017     | 3319  | 1.354774238 | 0.134277002 | 2.03709321  | 0.304954599 |
| LHX6      | 26468    | 3603  | 1.247986594 | 0.061846429 | 0.820978812 | 0.05618342  |
| NRGN      | 4900     | 1238  | 3.632064376 | 1.61994682  | 1.023997228 | 1.308102507 |
| FCGRT     | 2217     | 1893  | 2.375327891 | 15.8913959  | 3.571638861 | 26.94774087 |
| POPDC3    | 64208    | 1848  | 2.433168667 | 1.205804571 | 1.37197897  | -           |
| GOLGA8D   | 1E+08    | 5339  | 0.842198108 | 0.208683915 | 2.532726115 | -           |
| LOC100133 | 1E+08    | 4273  | 1.052304165 | 1.303725045 | 0.939482908 | 0.615861273 |
| PI4KAP2   | 375133   | 2272  | 1.979091416 | 2.451944154 | 1.208935694 | 1.871041427 |
| TBC1D2    | 55357    | 3330  | 1.350299008 | 2.141335109 | 1.586221932 | 4.194471935 |
| MEI1      | 150365   | 4006  | 1.122440264 | 0.611872075 | 0.316452463 | 0.606377023 |
| ABCA7     | 10347    | 6834  | 0.657959569 | 1.891175844 | 1.051167967 | 4.650472854 |
| LOC10052  | 1.01E+08 | 2673  | 1.682190683 | 2.084106666 | 1.422793006 | 0.681578663 |
| PDIA3P    | 171423   | 2099  | 2.142208526 | 2.123227106 | 1.610555589 | 1.832371794 |
| MFSD6     | 54842    | 4797  | 0.937355784 | 1.114860211 | 1.233265232 | 1.434767842 |
| CHST6     | 4166     | 6885  | 0.653085795 | 0.55020416  | 0.429627692 | 0.411620055 |
| LOC54147  | 541473   | 1019  | 4.412655247 | 4.810911741 | 3.110178038 | 2.383853146 |
| GRASP     | 160622   | 1950  | 2.305895229 | 0.228546343 | 1.191862756 | 0.207619347 |
| FBXO6     | 26270    | 1565  | 2.87316019  | 16.94382715 | 4.185193356 | 52.64443912 |

|           |        |      |             |             |             |             |
|-----------|--------|------|-------------|-------------|-------------|-------------|
| TMEM134   | 80194  | 930  | 4.83494161  | 4.792100747 | 5.452509971 | 5.223970657 |
| WDYHV1    | 55093  | 1348 | 3.3356793   | 4.297959795 | 4.702183116 | 2.703056034 |
| JPH2      | 57158  | 4802 | 0.936379779 | 0.97448696  | 1.143982465 | 0.969567648 |
| EIF5AL1   | 143244 | 3849 | 1.168224395 | 0.694723881 | 0.384253918 | 0.420740687 |
| GLYCTK    | 132158 | 3800 | 1.183288341 | 1.583284865 | 0.945221301 | 1.438310342 |
| CLEC2B    | 9976   | 2052 | 2.191274706 | 0.651557558 | 2.059305666 | 15.68527739 |
| LRFN1     | 57622  | 3212 | 1.399905261 | 1.11000092  | 0.789357763 | 2.016725907 |
| DPY19L2P4 | 442523 | 2018 | 2.228194102 | 1.104225395 | 2.617501999 | 0.501558134 |
| CAPN3     | 825    | 3316 | 1.355999909 | 10.6846794  | 1.274335111 | 20.69462743 |
| MASP2     | 10747  | 2471 | 1.819706879 | 2.795553714 | 1.111575029 | 1.064983901 |
| CABP4     | 57010  | 4036 | 1.114097051 | 0.883380316 | 0.68055052  | 1.805609283 |
| SDHAP2    | 727956 | 2319 | 1.938980464 | 1.345259848 | 1.82220579  | 2.182286147 |
| C19orf40  | 91442  | 1152 | 3.90320807  | 7.930677148 | 3.851545129 | 3.86582898  |
| ZBTB37    | 84614  | 2300 | 1.954998129 | 1.647024192 | 2.020984674 | 2.02428863  |
| ADAM8     | 101    | 3316 | 1.355999909 | 2.553571176 | 1.7203524   | 4.883687888 |
| CTU1      | 90353  | 2107 | 2.134074844 | 1.269099296 | 1.50416299  | 1.152893382 |
| C3orf33   | 285315 | 1931 | 2.328583996 | 0.807782907 | 0.984755491 | 0.838648837 |
| ATCAY     | 85300  | 5049 | 0.890571538 | 1.191618635 | 0.878783915 | 1.282971601 |
| CREB3L4   | 148327 | 1747 | 2.573838407 | 3.061238943 | 2.056005119 | 1.506339564 |
| LOC100009 | 1E+08  | 2788 | 1.612803335 | 1.039033322 | 1.364105346 | 1.089107943 |
| PEX7      | 5191   | 1499 | 2.999663574 | 4.310972553 | 3.664712338 | 2.025639056 |
| SPATA2L   | 124044 | 2388 | 1.882954647 | 1.866270391 | 2.034987233 | 3.899383457 |
| NME3      | 4832   | 1038 | 4.134980278 | 4.293500669 | 3.663897596 | 1.170109034 |
| LOC100128 | 1E+08  | 1438 | 2.984777141 | 4.493844129 | 1.910084769 | 3.660048982 |
| FAM109A   | 144717 | 3256 | 1.318215457 | 1.163438465 | 2.011617814 | 3.046380309 |
| FKBP9     | 11328  | 3491 | 1.229478524 | 0.829798024 | 0.786795158 | 0.695831096 |
| CCDC167   | 154467 | 637  | 6.73800554  | 4.897421643 | 5.970370023 | 0.953354143 |
| LEPREL2   | 10536  | 2656 | 1.616005094 | 0.671182785 | 0.477299913 | -           |
| GNPDA2    | 132789 | 1939 | 2.213568607 | 2.413350376 | 2.942077647 | 1.461580238 |
| GLIPR1L2  | 144321 | 1745 | 2.459661621 | 3.064747527 | 2.300521757 | 4.176182846 |
| MBOAT1    | 154141 | 3275 | 1.310567795 | 1.088648231 | 1.870918498 | 2.225172234 |
| LOC100272 | 1E+08  | 3216 | 1.334611172 | 0.623598931 | 1.313959959 | 0.440610087 |
| ZNF383    | 163087 | 1694 | 2.533712827 | 2.236219386 | 2.619232579 | 1.911960925 |
| LGALS8    | 3964   | 6281 | 0.683348118 | 0.283818099 | 0.437303279 | 0.19337258  |
| GPR183    | 1880   | 1801 | 2.383181304 | 0.123727199 | 2.580935452 | -           |
| HOXC6     | 3223   | 2072 | 2.071481433 | 3.656520889 | 3.976884987 | 7.718088887 |
| LDHD      | 197257 | 2096 | 2.04776218  | 1.913639468 | 3.528132943 | 4.249460864 |
| SLC27A1   | 376497 | 3562 | 1.204971794 | 1.376282724 | 1.364275551 | 1.363922715 |
| HES2      | 54626  | 4273 | 1.004472157 | 0.417192014 | 0.791143501 | 0.757983105 |
| ZNF773    | 374928 | 2206 | 1.945652552 | 1.818217736 | 2.107100975 | 1.192917143 |
| REPS2     | 9185   | 7964 | 0.538938916 | 0.363739942 | 0.822429382 | 0.203343911 |
| FLJ45445  | 399844 | 4874 | 0.880613363 | 1.554433993 | 0.693589697 | 2.201216606 |
| MAP3K10   | 4294   | 3453 | 1.243008841 | 1.290661365 | 1.590907557 | 1.934593825 |
| APITD1    | 378708 | 1431 | 2.999377728 | 4.515826595 | 4.134153262 | 2.970654173 |
| C15orf2   | 23742  | 8053 | 0.532982681 | 0.664098402 | 0.341078095 | 0.52787857  |
| ASRGL1    | 80150  | 2424 | 1.770672248 | 8.825056821 | 1.917600969 | 9.687189811 |
| C10orf47  | 254427 | 3360 | 1.27741355  | 1.127427274 | 0.440176586 | 0.240986742 |
| RGS1      | 5996   | 1403 | 3.059237013 | 8.258944837 | 6.776774242 | 80.79840574 |
| GLI4      | 2738   | 1363 | 3.149016529 | 2.779277799 | 2.635246473 | 2.079239972 |
| RABL2B    | 11158  | 2438 | 1.760504319 | 2.74199366  | 1.906589315 | 1.162429894 |
| SPRN      | 503542 | 3188 | 1.346332976 | 2.096919869 | 1.921975558 | 1.841416884 |
| ARL6      | 84100  | 1408 | 3.048373245 | 0.9495711   | 3.151264196 | 1.293934493 |
| AK1       | 203    | 2266 | 1.894134832 | 2.851786345 | 1.864825784 | 6.163985677 |
| SFT2D2    | 375035 | 880  | 4.877397192 | 6.077255038 | 4.081637435 | 9.66137755  |
| NUDT8     | 254552 | 834  | 5.146414303 | 3.473411153 | 4.053424678 | 1.456322755 |
| GOLGA6L5  | 374650 | 7309 | 0.58723622  | 0.487799009 | 0.260167308 | 0.166175014 |
| DSE       | 29940  | 4077 | 1.052761719 | 1.093120847 | 0.932824553 | 2.48257129  |
| ZFPM1     | 161882 | 3241 | 1.324316424 | 1.512594589 | 1.629780634 | 1.061799034 |
| PIK3R6    | 146850 | 3061 | 1.40219194  | 0.946365535 | 5.176856289 | 9.126162394 |
| EID2      | 163126 | 1409 | 3.046209744 | 2.372242918 | 2.849120274 | 2.011358468 |
| MCEE      | 84693  | 875  | 4.905268033 | 5.347984434 | 4.829365974 | 2.082125448 |
| MAK       | 4117   | 3899 | 1.100823167 | 0.68581488  | 1.083789491 | 1.817135215 |



|           |          |       |             |             |             |             |
|-----------|----------|-------|-------------|-------------|-------------|-------------|
| PABPC1P2  | 728773   | 3934  | 1.091029367 | 0.962927209 | 1.074147236 | 0.926212388 |
| NIPAL2    | 79815    | 2255  | 1.903374514 | 4.347954824 | 4.028933365 | 4.129369266 |
| KLF12     | 11278    | 10923 | 0.392942372 | 0.326405104 | 0.251460395 | 0.055597051 |
| DHRS11    | 79154    | 1608  | 2.669222344 | 2.355818184 | 3.153503901 | 0.377665789 |
| CCDC73    | 493860   | 4015  | 1.069018563 | 1.11000092  | 1.578715527 | 0.756272215 |
| NFIA      | 4774     | 9495  | 0.452038918 | 0.093873696 | 0.356035406 | 0.021319522 |
| MMAA      | 166785   | 5943  | 0.722212608 | 0.637414713 | 0.817693002 | 0.885604987 |
| LOC64496  | 644961   | 2652  | 1.618442507 | 1.092317082 | 1.115379585 | 0.686975779 |
| MOB3C     | 148932   | 2822  | 1.520945971 | 3.079544545 | 2.320987811 | 16.1397924  |
| EMR1      | 2015     | 3150  | 1.362574454 | 7.781458832 | 2.213459405 | 14.20215197 |
| MSH5-C6o  | 1.01E+08 | 4070  | 1.054572366 | 0.985500817 | 0.622952613 | 0.099473643 |
| CFD       | 1675     | 1173  | 3.659087407 | 13.48774136 | 4.503085281 | 12.94302193 |
| EIF4E3    | 317649   | 6222  | 0.689827954 | 0.07162735  | 0.44145     | 0.520549953 |
| SLC2A6    | 11182    | 2563  | 1.674642813 | 4.086280212 | 3.956952222 | 7.187290881 |
| C2CD2     | 25966    | 6349  | 0.676029222 | 0.842334924 | 0.732125492 | 0.765205971 |
| CCNJL     | 79616    | 3274  | 1.310968091 | 0.544490372 | 2.710433713 | 2.225851883 |
| ZNF460    | 10794    | 3849  | 1.115123286 | 0.463149254 | 1.262548587 | 0.736296202 |
| NBPF24    | 728912   | 3409  | 1.25905237  | 1.241953948 | 0.867699225 | 0.475045733 |
| WDR35     | 57539    | 6957  | 0.61694833  | 0.096089989 | 0.121480386 | -           |
| TMEM80    | 283232   | 1637  | 2.497082078 | 4.492045569 | 4.517389522 | 3.338777825 |
| ALKBH6    | 84964    | 980   | 4.171146287 | 4.774986102 | 3.66514382  | 3.511521092 |
| GIMAP6    | 474344   | 3660  | 1.116864306 | 2.800629371 | 0.461824615 | 3.926898708 |
| IPCEF1    | 26034    | 6858  | 0.596051817 | 4.646409145 | 2.341446758 | 17.85789765 |
| PARD6B    | 84612    | 4625  | 0.883832078 | 0.626340519 | 0.913663833 | 1.969578126 |
| WNT10B    | 7480     | 2370  | 1.724777789 | 0.470111149 | 1.06979626  | -           |
| FAM127A   | 8933     | 1254  | 3.259747497 | 2.843160252 | 1.010931873 | 0.322853051 |
| AKAP5     | 9495     | 6487  | 0.630140799 | 0.515259792 | 0.5862688   | 0.249642501 |
| FLJ39051  | 399972   | 753   | 5.428583481 | 6.510383884 | 5.611813051 | 1.075319325 |
| ZNF192P1  | 651302   | 1640  | 2.492514244 | 1.222862294 | 1.417153887 | 0.617161168 |
| RNF39     | 80352    | 2170  | 1.883743484 | 1.232254478 | 1.94732499  | 1.399277855 |
| ZNF341    | 84905    | 3330  | 1.227544553 | 1.672918054 | 1.649670809 | 1.580525657 |
| C8orf44   | 56260    | 1901  | 2.15030161  | 2.696029326 | 1.33372811  | 2.981592931 |
| BTD       | 686      | 2082  | 1.963363766 | 2.568676481 | 2.334077575 | 2.527930085 |
| RNASE6    | 6039     | 1065  | 3.838237898 | 0.627697703 | 3.571010051 | 3.611406945 |
| C1orf183  | 55924    | 5980  | 0.683565779 | 2.049464492 | 1.165952696 | 3.99441569  |
| CD248     | 57124    | 2576  | 1.586849131 | 0.259510114 | 4.183044577 | 0.471495799 |
| C16orf55  | 124045   | 2190  | 1.866540347 | 1.831501518 | 2.31544944  | 0.462166354 |
| HECW2     | 57520    | 6926  | 0.590199734 | 0.064346718 | 0.88467486  | 0.029227384 |
| GPR126    | 57211    | 6980  | 0.585633719 | 0.031924453 | -           | -           |
| C7orf55   | 154791   | 683   | 5.984953676 | 4.893836415 | 6.805658492 | 3.852965181 |
| IFT27     | 11020    | 1099  | 3.719493504 | 3.446911411 | 3.845036603 | 3.131292694 |
| KIAA1407  | 57577    | 3996  | 1.022953794 | 2.007501664 | 1.32185161  | 0.607894483 |
| PDE4C     | 5143     | 5346  | 0.764632129 | 1.250464    | 0.711396503 | 1.438888289 |
| FAM201A   | 158228   | 1741  | 2.347916922 | 1.919868048 | 1.213582776 | -           |
| TRPV1     | 7442     | 4443  | 0.920036768 | 1.103380388 | 0.951090531 | 1.549084254 |
| TPM2      | 7169     | 1327  | 3.080424537 | 1.679221437 | 3.502837038 | 1.372916177 |
| EXPH5     | 23086    | 10208 | 0.400443119 | 0.938656489 | 0.372563255 | 0.634573238 |
| FAM114A1  | 92689    | 4138  | 0.987850015 | 0.646204016 | 1.582848623 | 0.684872905 |
| MTMR7     | 9108     | 5302  | 0.770977624 | 0.588392604 | 0.956400278 | 0.801774071 |
| IDAS      | 345643   | 2104  | 1.942834297 | 0.529545353 | 1.807569251 | 0.096211437 |
| CACNB1    | 782      | 3687  | 1.108685479 | 0.24174959  | 0.744969324 | 0.274517037 |
| IL15      | 3600     | 2493  | 1.63968045  | -           | -           | -           |
| SLC31A2   | 1318     | 1791  | 2.282369269 | 3.234868679 | 5.072721797 | 25.09168486 |
| STRA6     | 64220    | 3097  | 1.319897759 | 5.324384459 | 3.001785437 | 4.248587695 |
| U2AF1L4   | 199746   | 792   | 5.16126687  | 2.250835199 | 2.934510574 | 4.856247975 |
| CYP27B1   | 1594     | 2503  | 1.633129589 | 2.136629818 | 2.363553064 | 0.485246975 |
| TMEM2     | 23670    | 6540  | 0.625034153 | 1.192529658 | 0.581517692 | 2.476194042 |
| CD300A    | 11314    | 1911  | 2.139049378 | 49.90705864 | 3.427434643 | 126.796101  |
| SERPINB1C | 5273     | 1194  | 3.423553904 | 0.373254078 | 5.83952858  | 0.169538411 |
| FNTB      | 2342     | 2836  | 1.441369309 | 1.021447427 | 2.086027263 | 0.214134904 |
| LOC80054  | 80054    | 2281  | 1.792075125 | 0.488453934 | 1.667306315 | 0.266236996 |
| ZNF829    | 374899   | 5056  | 0.808489589 | 0.352583362 | 0.334311331 | 0.600560313 |

|           |        |      |             |             |             |             |
|-----------|--------|------|-------------|-------------|-------------|-------------|
| CNKSR3    | 154043 | 3277 | 1.247398035 | 0.475992918 | 1.160551024 | 0.247090464 |
| CACNG8    | 59283  | 8751 | 0.467115    | 0.534737331 | 0.579457693 | 0.508905838 |
| SERTAD3   | 29946  | 1527 | 2.676963563 | 4.085995529 | 3.597513946 | 5.170088838 |
| FLJ31662  | 440594 | 2755 | 1.483747136 | 2.507373222 | 1.150370752 | 2.204307038 |
| LOC100130 | 1E+08  | 2638 | 1.549553965 | 1.098114064 | 1.041206178 | 0.920828793 |
| CDH12     | 1010   | 4345 | 0.940787885 | 0.76927279  | 0.778033644 | 0.559067055 |
| NRIP3     | 56675  | 3809 | 1.073174944 | 1.228534098 | 1.996915571 | 2.072650474 |
| CYP51A1   | 1595   | 3208 | 1.27422798  | 1.944923682 | 1.185513    | 1.703734196 |
| ZMAT5     | 55954  | 1051 | 3.88936571  | 2.968275534 | 3.015481846 | 2.503877468 |
| SLC9A3R2  | 9351   | 2192 | 1.8648373   | 0.30497174  | 3.084449071 | 0.369395735 |
| LOC349190 | 349196 | 2874 | 1.422311538 | 1.240543826 | 1.102738838 | 1.126952612 |
| ZNF221    | 7638   | 2426 | 1.684964287 | 1.561482127 | 0.870918225 | 0.834414109 |
| ZNF17     | 7565   | 2678 | 1.526409022 | 2.163424124 | 2.130204838 | 1.511791359 |
| ZNF821    | 55565  | 2020 | 2.023625426 | 0.661879262 | 1.778139081 | 2.605520018 |
| FLJ43663  | 378805 | 2964 | 1.379123941 | 0.225539155 | 0.784120234 | 1.229325079 |
| ZSCAN21   | 7589   | 2005 | 2.038764769 | 2.333908419 | 3.4775048   | 1.514430396 |
| DSTNP2    | 171220 | 1057 | 3.867287948 | 2.951426288 | 3.398146588 | 4.596303416 |
| C5AR1     | 728    | 2342 | 1.745398532 | 6.279657213 | 28.86896825 | 113.6609542 |
| OSR2      | 116039 | 1907 | 2.14353611  | 2.220147357 | 1.440326113 | 0.530752132 |
| ACOX2     | 8309   | 2356 | 1.735026893 | 0.567485615 | 1.165832724 | 1.80433197  |
| STC2      | 8614   | 5361 | 0.762492699 | 0.665048117 | 0.867051809 | 2.794205532 |
| FNIP2     | 57600  | 5801 | 0.704658397 | 1.382860998 | 1.129085951 | 8.060863186 |
| C8orf80   | 389643 | 3912 | 1.04491906  | 0.911381124 | 0.810140956 | 1.500622962 |
| PPP2R3B-A | 283981 | 2188 | 1.868246509 | 2.036861835 | 1.062217722 | 1.850355237 |
| ZDHHC11   | 79844  | 2618 | 1.561391658 | 1.361849869 | 1.452683615 | 1.469117034 |
| ADAMTSL4  | 54507  | 4209 | 0.971186353 | 3.335343107 | 1.405553176 | 7.310331948 |
| TPST1     | 8460   | 2062 | 1.982407062 | 0.43226515  | 3.278909973 | 1.472566898 |
| PCYT1B    | 9468   | 5564 | 0.734673501 | 1.28156828  | 0.645550134 | 0.982311161 |
| LOC148189 | 148189 | 2085 | 1.862511843 | 0.641245136 | 1.520034254 | 0.679617286 |
| CCDC163P  | 126661 | 2169 | 1.790381371 | 2.568380414 | 2.532689624 | 1.39992298  |
| TRIM59    | 286827 | 3886 | 0.999314769 | 0.516081874 | 0.652449083 | 0.573010163 |
| KREMEN1   | 83999  | 6152 | 0.631231663 | 0.651981197 | 0.583849308 | 0.987136848 |
| MMP14     | 4323   | 3558 | 1.091438222 | 0.313143177 | 1.900256426 | 3.413640185 |
| ZNF543    | 125919 | 3671 | 1.057841785 | 1.092614635 | 1.784208009 | 1.929994607 |
| LTB4R2    | 56413  | 1560 | 2.489318713 | 2.713987827 | 0.812633698 | 2.205955558 |
| HPSE      | 10855  | 4668 | 0.831905997 | 0.572834665 | 0.226311869 | 2.254991618 |
| RAB3C     | 115827 | 1030 | 3.770230284 | 4.110505835 | 7.794971778 | 1.76879589  |
| BTN2A3P   | 54718  | 2483 | 1.563969872 | 2.243583213 | 0.68074027  | 2.690355408 |
| PSEN2     | 5664   | 2302 | 1.68694057  | 2.80718847  | 3.579542004 | 7.034886636 |
| GALNT12   | 79695  | 2752 | 1.411096364 | 3.076904804 | 1.305174761 | 8.238383957 |
| UBE2Q2P1  | 388165 | 2150 | 1.806203346 | 1.451003529 | 1.670623694 | 0.659070717 |
| LOC284270 | 284276 | 2273 | 1.708463349 | 1.470519257 | 1.673174529 | 1.335870191 |
| ZNF16     | 7564   | 2632 | 1.475432064 | 1.608594609 | 1.766058036 | 1.307481258 |
| LOC728600 | 728606 | 2598 | 1.494741029 | 2.744667403 | 0.731933353 | 2.960853269 |
| FGFR4     | 2264   | 3084 | 1.259188454 | 0.361272187 | 1.438709465 | 0.196915236 |
| C16orf46  | 123775 | 1931 | 2.011049815 | 0.923180465 | 1.750676428 | 0.209662209 |
| SYCP2     | 10388  | 5497 | 0.706446642 | 1.175577198 | 1.345273176 | 1.583489377 |
| TCEA2     | 6919   | 1749 | 2.220318578 | 0.764434596 | 1.691244516 | 0.925918184 |
| LOC100289 | 1E+08  | 1872 | 2.074432261 | 1.309380092 | 1.805852661 | 2.054566451 |
| NAP1L5    | 266812 | 1965 | 1.976253024 | 0.793806002 | 1.397812671 | 1.33922403  |
| SLC22A18  | 5002   | 1563 | 2.48454075  | 3.564182417 | 1.48696889  | 7.900294715 |
| C3orf54   | 389119 | 1058 | 3.670451033 | 0.210616904 | 2.7958286   | 0.956658143 |
| TTC30B    | 150737 | 2652 | 1.464305125 | 1.176341473 | 1.035709615 | 1.450282201 |
| TTC28-AS1 | 284900 | 5125 | 0.75772433  | 1.47830464  | 0.618394423 | 0.315986518 |
| ZSCAN16   | 80345  | 1290 | 3.010338909 | 1.381908122 | 2.948159461 | 4.393804777 |
| FLT3LG    | 2323   | 1125 | 3.451855283 | 3.763396453 | 1.878086768 | 3.958608876 |
| ERBB2     | 2064   | 4816 | 0.806340779 | 0.971654149 | 0.658071308 | 0.630488568 |
| ACOT2     | 10965  | 1767 | 2.197700732 | 2.648266202 | 1.554443632 | 2.978579761 |
| HIST1H4C  | 8364   | 390  | 9.957274853 | 7.427756158 | 9.209848572 | 1.5571451   |
| ISPD      | 729920 | 5524 | 0.702993699 | 0.403390088 | 0.611976137 | 0.43974409  |
| C15orf52  | 388115 | 5344 | 0.726672379 | 0.959047857 | 0.672125925 | 1.81822332  |
| PGBD3     | 267004 | 2298 | 1.689876933 | 1.842393825 | 2.942172482 | 2.642674451 |

|          |          |      |             |             |             |             |
|----------|----------|------|-------------|-------------|-------------|-------------|
| KIAA0513 | 9764     | 7361 | 0.527555657 | 5.206795514 | 0.545362106 | 30.5802059  |
| ZNF713   | 349075   | 2065 | 1.880550699 | 2.266095099 | 2.353292742 | 2.254655616 |
| C5orf55  | 116349   | 1646 | 2.359257104 | 3.249079243 | 3.080701259 | 1.106840684 |
| LTC4S    | 4056     | 680  | 5.710789989 | 12.12471961 | 4.039267497 | 4.167653061 |
| CLECL1   | 160365   | 649  | 5.983570405 | 6.523607103 | 5.534423641 | 11.54062855 |
| USP43    | 124739   | 4089 | 0.949703398 | 1.144408506 | 1.291787487 | 0.693079991 |
| ZCWPW1   | 55063    | 2356 | 1.648275549 | 2.837428074 | 2.331665448 | 2.74945824  |
| TFAP2E   | 339488   | 2189 | 1.774023386 | 1.628745069 | 1.447817003 | 2.496838419 |
| FCAR     | 2204     | 1671 | 2.32396002  | 8.267879386 | 4.678357971 | 25.68217771 |
| LOC10050 | 1.01E+08 | 2555 | 1.51989714  | 1.569858444 | 2.232754817 | 3.486054783 |
| IQSEC2   | 23096    | 6004 | 0.646791671 | 1.076307105 | 0.879766661 | 3.438998005 |
| RELL2    | 285613   | 2599 | 1.494165907 | 2.229184226 | 1.788482012 | 2.803939618 |
| NEIL1    | 79661    | 1907 | 2.036359304 | 1.986447635 | 1.772709062 | 1.592256395 |
| FGD1     | 2245     | 4291 | 0.90499585  | 0.934744424 | 0.886302891 | 0.896329153 |
| INADL    | 10207    | 8505 | 0.456594614 | 0.497803764 | 0.149054505 | 0.357017395 |
| ENO3     | 2027     | 1536 | 2.528214318 | 5.367714411 | 1.237996649 | 3.821899105 |
| FGGY     | 55277    | 2102 | 1.847448712 | 1.166108246 | 1.407224862 | 0.770423836 |
| TLR9     | 54106    | 3922 | 0.990142069 | 1.079505612 | 1.454535583 | 1.393569429 |
| TFEC     | 22797    | 6631 | 0.585633719 | 2.453142209 | 0.191179093 | 5.922364562 |
| HOXA4    | 3201     | 1728 | 2.247301616 | 3.739668899 | 1.711797835 | 8.785974955 |
| CDC42EP4 | 23580    | 3121 | 1.244260555 | 5.497634324 | 1.89553775  | 4.929379553 |
| KIAA1522 | 57648    | 5422 | 0.71621859  | 0.205489381 | 1.441817811 | 0.261343054 |
| TNFRSF9  | 3604     | 6001 | 0.647115013 | 1.373905905 | 0.985831248 | 1.045708174 |
| PROCR    | 10544    | 1483 | 2.618568572 | 0.601032191 | 1.282240629 | 2.320492697 |
| SIGLEC5  | 8778     | 2498 | 1.55457854  | 0.892044374 | 3.721589071 | 11.99338339 |
| XKR9     | 389668   | 3191 | 1.216965588 | 1.885453616 | 1.655317779 | 2.283747749 |
| EMR4P    | 326342   | 2732 | 1.421426498 | 3.26255761  | 3.557503303 | 17.33834331 |
| GPR135   | 64582    | 1834 | 2.117413955 | 1.579511942 | 1.612860774 | 0.883004855 |
| TRADD    | 8717     | 1496 | 2.595813632 | 4.468569881 | 4.095760748 | 5.818476676 |
| IRF5     | 3663     | 2900 | 1.339081791 | 1.459938279 | 2.404274871 | 4.118380315 |
| APOBEC3G | 60489    | 1848 | 2.10137294  | 4.220315999 | 2.400963197 | 20.15525475 |
| ITPRIPL2 | 162073   | 7722 | 0.502892669 | 3.635964553 | 0.656673695 | 8.100300266 |
| ZNF439   | 90594    | 2566 | 1.513381603 | 1.910490672 | 0.741061127 | 0.867777667 |
| FN1      | 2335     | 8815 | 0.440537401 | 0.151672843 | 0.55128185  | 2.526055011 |
| LOC72832 | 728323   | 1128 | 3.442674816 | 0.987733532 | 4.308111269 | 2.153498542 |
| ARGFX    | 503582   | 5065 | 0.766700334 | 1.011875962 | 0.333717293 | 0.999155296 |
| ASB2     | 51676    | 2781 | 1.396381587 | 90.8638132  | 1.063641373 | 203.3751324 |
| HLA-L    | 3139     | 4622 | 0.840185459 | 1.012437555 | 0.502841275 | 1.970856519 |
| FRS3     | 10817    | 2200 | 1.672250466 | 0.709013088 | 0.960385279 | 0.920131195 |
| C7orf23  | 79161    | 1083 | 3.397000023 | 2.263305201 | 0.975460579 | 4.85978803  |
| DUSP5P   | 574029   | 2472 | 1.488248796 | 1.98313878  | 1.025654181 | 0.245666096 |
| GTF2H2D  | 730394   | 1842 | 1.997258971 | 2.177518092 | 1.60585595  | 0.989066106 |
| MRPS24   | 64951    | 715  | 5.145386049 | 2.181578732 | 4.728050604 | 0.566234582 |
| NUDT6    | 11162    | 1195 | 3.078620104 | 2.051179525 | 1.944880649 | 0.338793076 |
| DNAJB2   | 3300     | 3129 | 1.175759356 | 3.275903962 | 1.958216069 | 7.892720128 |
| MTCP1    | 4515     | 2329 | 1.579626889 | 0.861096678 | 1.451505445 | 1.390666298 |
| LOC37519 | 375190   | 1386 | 2.654365819 | 2.572383085 | 1.219536862 | 0.438157712 |
| ZNF707   | 286075   | 2302 | 1.598154224 | 1.645593241 | 2.753493849 | 3.077762903 |
| CHST7    | 56548    | 2330 | 1.578948938 | 4.877453615 | 1.088161861 | 21.63295574 |
| CDKL3    | 51265    | 2138 | 1.720744165 | 0.729573804 | 0.988235554 | 0.946814139 |
| KMO      | 8564     | 5015 | 0.733589437 | 0.933097982 | 0.379175045 | 4.884126105 |
| PMFBP1   | 83449    | 3690 | 0.997005698 | 1.449318275 | 1.087916115 | 1.152034179 |
| SIGLECP3 | 284367   | 2251 | 1.634362961 | 3.860717328 | 4.317680596 | 5.485633336 |
| CEMP1    | 752014   | 1374 | 2.677548053 | 1.459602738 | 1.845281759 | 1.47328139  |
| ZNF674   | 641339   | 4095 | 0.898400739 | 1.088315921 | 1.289894758 | 2.175059822 |
| LOC10029 | 1E+08    | 3356 | 1.096230937 | 2.191143801 | 1.510975647 | 2.412739725 |
| RRAS     | 6237     | 1013 | 3.631738425 | 2.639676423 | 4.380039475 | 4.79594542  |
| HES1     | 3280     | 1475 | 2.494204085 | 0.302146013 | 3.867585462 | 0.96067935  |
| SUMO1P1  | 391257   | 1212 | 3.035438139 | 1.838553504 | 2.789237774 | 1.169143598 |
| ZNF77    | 58492    | 2057 | 1.788503172 | 2.166579336 | 1.746155053 | 1.082507289 |
| NECAB1   | 64168    | 5140 | 0.715749227 | 0.086705325 | 0.411059847 | 0.039383047 |
| KCNJ5    | 3762     | 2912 | 1.263376039 | 0.841744345 | 0.943235542 | 0.695154062 |

|           |          |      |             |             |             |             |
|-----------|----------|------|-------------|-------------|-------------|-------------|
| INPP5J    | 27124    | 2238 | 1.643856579 | 1.2943811   | 3.115458948 | 2.170818906 |
| BIRC3     | 330      | 5243 | 0.70168816  | 2.380055378 | 0.685073611 | 6.33193468  |
| IDI2      | 91734    | 1359 | 2.707101563 | 3.935235051 | 4.042239732 | 1.936405606 |
| C12orf34  | 84915    | 3183 | 1.155812449 | 0.980099776 | 1.261203414 | 0.826759415 |
| KLF5      | 688      | 3350 | 1.098194336 | 1.330344387 | 0.882981092 | 1.389810104 |
| IFI27L1   | 122509   | 732  | 5.025889378 | 1.52208118  | 2.309123075 | 4.148132438 |
| IPP       | 3652     | 3269 | 1.125405636 | 0.954315566 | 0.840226949 | 0.990780608 |
| HERC2P4   | 440362   | 1176 | 3.128359715 | 3.410704358 | 1.796639127 | 2.237734029 |
| TXNDC3    | 51314    | 2327 | 1.58098454  | 1.244875334 | 1.906738285 | 1.217878849 |
| SMOX      | 54498    | 2203 | 1.66997323  | 17.70118921 | 3.54858655  | 24.62593521 |
| LOC10050  | 1.01E+08 | 2481 | 1.48285007  | 1.526866441 | 0.93677242  | 0.407958208 |
| B3GALTL   | 145173   | 4221 | 0.871582806 | 1.794909093 | 3.053392666 | 1.246896574 |
| RPS6KA2   | 6196     | 5817 | 0.632448173 | 0.497992935 | 0.87172671  | 0.869988237 |
| ZNRD1-AS1 | 80862    | 2445 | 1.504683446 | 1.458209798 | 1.555470636 | 0.662343928 |
| ZNF225    | 7768     | 2731 | 1.347107662 | 2.121438961 | 1.392576237 | 1.778942772 |
| PLEKHA8P  | 51054    | 1886 | 1.950663322 | 2.126717034 | 1.90447558  | 0.965991393 |
| SH3RF1    | 57630    | 5265 | 0.69875613  | 0.634850954 | 0.561820828 | 1.268784896 |
| BAMBI     | 25805    | 1732 | 2.124105673 | 0.385968853 | 2.073811168 | 0.233751574 |
| COL6A1    | 1291     | 4246 | 0.866451019 | 0.104961227 | 0.547369848 | 0.190700766 |
| CCL2      | 6347     | 760  | 4.840725033 | 528.9344254 | 16.95838216 | 2984.227606 |
| ZNF578    | 147660   | 6741 | 0.545757458 | 0.49584487  | 0.564178268 | 0.57056051  |
| AVPI1     | 60370    | 1422 | 2.587166684 | 0.626814866 | 1.634410953 | 1.992970521 |
| DPY19L2P1 | 554236   | 3941 | 0.933506984 | 1.130843363 | 0.643343602 | -           |
| NMNAT2    | 23057    | 5579 | 0.659428397 | 0.119823993 | 0.340842956 | 0.253988536 |
| FBLIM1    | 54751    | 3363 | 1.09394916  | 1.06016145  | 1.068046668 | 1.444630601 |
| FBXO48    | 554251   | 2732 | 1.346614577 | 0.815639402 | 2.242773821 | 1.037336779 |
| GJD3      | 125111   | 4042 | 0.910180857 | 0.826939701 | 0.888629625 | 0.801301783 |
| FLJ38109  | 386627   | 3487 | 1.055047612 | 1.533692123 | 0.54532918  | 0.986891503 |
| ARMC9     | 80210    | 2235 | 1.646063098 | 0.997014249 | 1.039880257 | 0.543433189 |
| RCAN3     | 11123    | 1700 | 2.164088838 | 0.524312199 | 3.107128844 | 0.238151603 |
| AIFM2     | 84883    | 3256 | 1.129898963 | 1.847814032 | 1.103145253 | 0.621710267 |
| LOC100129 | 1E+08    | 1013 | 3.631738425 | 2.199730353 | 2.711453009 | 1.398817414 |
| ITIH5     | 80760    | 6765 | 0.54382129  | 0.592902931 | 0.312320416 | 0.508690417 |
| CSAD      | 51380    | 2709 | 1.358047628 | 2.632205947 | 0.935923638 | 2.914258271 |
| KBTBD3    | 143879   | 4231 | 0.869522814 | 0.737333393 | 0.998746213 | 0.669818975 |
| COL9A3    | 1299     | 2485 | 1.480463189 | 1.434737608 | 1.870529074 | 1.955047369 |
| PLB1      | 151056   | 5148 | 0.714636951 | 9.522764305 | 0.697715801 | 4.993874436 |
| NLRP12    | 91662    | 3871 | 0.950387762 | 2.360149851 | 0.873303069 | 7.059647765 |
| VMAC      | 400673   | 1708 | 2.153952591 | 3.39206663  | 1.97924835  | 2.844433671 |
| RFTN1     | 23180    | 3033 | 1.212974291 | 0.293877593 | 1.114591554 | 0.400452746 |
| FOXO1     | 2308     | 5738 | 0.641155633 | 0.271841895 | 0.920550546 | 1.270031207 |
| GLT25D2   | 23127    | 5182 | 0.709948094 | 0.04300129  | 0.285409751 | 0.039063849 |
| KCNN2     | 3781     | 2515 | 1.462803588 | -           | 0.672078764 | -           |
| ULK4      | 54986    | 4425 | 0.831401362 | 0.654649695 | 0.668471561 | 0.274479814 |
| KCNIP2    | 30819    | 2608 | 1.41064073  | 1.879723568 | 1.620281912 | 2.018079155 |
| ABCA9     | 10350    | 6310 | 0.583035028 | 0.494398984 | 0.435293486 | 0.481209658 |
| CY5D2     | 124936   | 2059 | 1.786765918 | 3.354936001 | 2.770611247 | 1.474712455 |
| PSIMCT-1  | 1E+08    | 839  | 4.384923748 | 3.187118256 | 5.54024404  | 1.688917808 |
| HMOX1     | 3162     | 1606 | 2.290754063 | 0.83250069  | 5.393944717 | 16.63798874 |
| C5orf35   | 133383   | 1722 | 2.136440781 | 1.423437591 | 2.822038044 | 0.940436065 |
| USP51     | 158880   | 4410 | 0.834229257 | 0.303173721 | 0.574924521 | 0.091804473 |
| FAM36A    | 116228   | 2632 | 1.397777745 | 2.116571854 | 1.364681209 | 0.69219596  |
| YBEY      | 54059    | 1202 | 3.060691368 | 2.595389007 | 3.691331105 | 1.515690322 |
| DDX39A    | 10212    | 1558 | 2.361329284 | 2.145372446 | 2.441030619 | 1.559144002 |
| PEAR1     | 375033   | 4866 | 0.75605241  | 0.320556678 | 0.69473     | 0.665610729 |
| RNF144A   | 9781     | 5740 | 0.640932234 | 2.212798437 | 0.552137878 | 1.234322335 |
| LOC728554 | 728554   | 1827 | 2.013656828 | 0.853765076 | 1.040811632 | 0.332395506 |
| C14orf28  | 122525   | 2906 | 1.265984523 | 1.380243746 | 0.945183034 | 1.114542948 |
| C17orf76  | 388341   | 2785 | 1.320987801 | 0.560082152 | 0.910383173 | 0.436112452 |
| RNF175    | 285533   | 1589 | 2.315261815 | 0.981641783 | -           | 0.127393872 |
| ZNF610    | 162963   | 2272 | 1.529297912 | 1.471166493 | 1.022945588 | 1.514652584 |
| PELI3     | 246330   | 2763 | 1.257533426 | 1.854922819 | 1.68232528  | 1.904868055 |

|           |          |       |             |             |             |             |
|-----------|----------|-------|-------------|-------------|-------------|-------------|
| IDO1      | 3620     | 1944  | 1.787327601 | 1.260884533 | 0.869484615 | 3.748682647 |
| SEPT14    | 346288   | 3785  | 0.917982789 | 0.706470863 | 1.339718434 | 0.748746125 |
| C17orf48  | 56985    | 1518  | 2.288909655 | 3.669839999 | 3.201284263 | 5.467446233 |
| IRAK2     | 3656     | 3469  | 1.001604167 | 1.605885592 | 1.400850248 | 7.119147097 |
| PLCD1     | 5333     | 3053  | 1.138082167 | 1.678726416 | 1.245701181 | 0.729353912 |
| ZNF324B   | 388569   | 2995  | 1.160121822 | 1.190425027 | 1.128733283 | 0.743478295 |
| GOLGA6L9  | 440295   | 4375  | 0.794186253 | 0.509331851 | 0.627817577 | 0.185077818 |
| PROK2     | 60675    | 1613  | 2.154100965 | 0.138147976 | 0.130988693 | 0.25099673  |
| ITPKA     | 3706     | 1864  | 1.86403694  | 1.793181476 | 2.493704265 | 0.542995877 |
| ZNF79     | 7633     | 2099  | 1.655342952 | 1.80474304  | 2.113854211 | 1.060846828 |
| C19orf39  | 126074   | 1662  | 2.090592573 | 2.279275355 | 2.923916673 | 2.67956377  |
| CD1D      | 912      | 3795  | 0.915563862 | 2.289980159 | 0.668094107 | 4.267275108 |
| DEPDC7    | 91614    | 2013  | 1.726063019 | -           | 2.833923774 | -           |
| LOC92659  | 92659    | 1914  | 1.81534214  | 1.513492634 | 1.214280238 | 0.317286619 |
| KAZALD1   | 81621    | 2514  | 1.38208626  | 2.65910125  | 1.84895177  | 5.072799668 |
| SLIT1     | 6585     | 7949  | 0.437107165 | 0.252295152 | 0.292380472 | 0.3819893   |
| WASH1     | 1E+08    | 1837  | 1.891434326 | 3.032562394 | 1.380194413 | 1.322344233 |
| SPIRE2    | 84501    | 3249  | 1.069425933 | 1.028775091 | 0.845399168 | 0.623049747 |
| AGAP9     | 642517   | 2387  | 1.455619965 | 1.680347015 | 1.062177267 | 0.508828311 |
| LOXL3     | 84695    | 3121  | 1.11328576  | 3.92688166  | 1.353955536 | 10.83166296 |
| NRG4      | 145957   | 2195  | 1.582945265 | 1.624292918 | 0.577543767 | 1.383340749 |
| C2orf88   | 84281    | 4051  | 0.857705469 | 0.935116179 | 0.521561988 | 0.649611261 |
| LOC64236  | 642361   | 1712  | 2.029535547 | 3.774619076 | 1.60438195  | 2.71954664  |
| LOC28310  | 283104   | 2708  | 1.283074172 | 3.373759259 | 1.794516068 | 1.046530311 |
| JAM3      | 83700    | 3668  | 0.947264138 | 0.85050643  | 0.921634728 | 0.220751214 |
| TEX19     | 400629   | 1951  | 1.780914842 | 0.571073    | 2.599094963 | 1.763859903 |
| ZDHHC14   | 79683    | 2821  | 1.231678432 | 0.552934702 | 2.097119219 | 0.430547032 |
| CEACAM22  | 388550   | 3016  | 1.152044051 | 1.108252742 | 0.630491662 | 0.671183233 |
| ARMC2     | 84071    | 3413  | 1.018038341 | 0.457025723 | 1.052399925 | 0.474488984 |
| HHLA2     | 11148    | 2689  | 1.292140148 | 0.911550588 | 1.728622071 | 1.355046312 |
| TIGD6     | 81789    | 3508  | 0.990468887 | 1.016340637 | 1.023899927 | 2.019672236 |
| HTR7P1    | 93164    | 4389  | 0.791652963 | 0.913872938 | 0.914652647 | 2.259971357 |
| PLXNB3    | 5365     | 6377  | 0.544858845 | 1.048295522 | 0.662646264 | 1.587179418 |
| ZMYND17   | 118490   | 2433  | 1.428098996 | 2.198102932 | 1.389460001 | 1.414422799 |
| OPTN      | 10133    | 3597  | 0.965961873 | 0.619495926 | 1.174783216 | 5.909099419 |
| TMEM117   | 84216    | 2706  | 1.28402249  | 0.823476292 | 1.093121456 | 0.5236519   |
| SLC16A4   | 9122     | 2629  | 1.321629843 | 1.186632783 | 1.366238472 | 1.077977969 |
| WNK4      | 65266    | 4194  | 0.828460862 | 0.371919121 | 0.604534367 | 0.868793403 |
| EFNA4     | 1945     | 1276  | 2.723013211 | 2.619506482 | 5.133093732 | 5.869802452 |
| ATP8B5P   | 158381   | 2528  | 1.374432301 | 1.234041767 | 1.838712322 | 2.242091837 |
| LOC10021  | 1E+08    | 3615  | 0.961152104 | 1.294463729 | 1.168933673 | 1.287929142 |
| FAM131B   | 9715     | 4392  | 0.791112217 | 0.152208118 | 0.529174038 | 0.04609036  |
| LINC00339 | 29092    | 1103  | 3.150104131 | 3.838459665 | 3.256428779 | 2.93641143  |
| GPR82     | 27197    | 3349  | 1.037493239 | 2.861094489 | 1.324867121 | 24.60093975 |
| RTN4RL2   | 349667   | 1263  | 2.751041058 | 0.176431263 | 2.67660822  | 1.282209742 |
| PPT2      | 9374     | 2063  | 1.684229208 | 0.648083426 | 4.199066997 | 1.17748248  |
| SLC7A5P2  | 387254   | 2552  | 1.361506605 | 0.96048571  | 1.32466935  | 1.189824821 |
| ECHDC2    | 55268    | 1591  | 2.183887402 | 2.24093209  | 3.187199417 | 4.707647976 |
| VSTM4     | 196740   | 6354  | 0.546831107 | 0.455905713 | 0.465531423 | 0.637169855 |
| NPAS1     | 4861     | 2066  | 1.681783571 | 1.294284713 | 1.840815927 | 0.783848453 |
| LOC10050  | 1.01E+08 | 1991  | 1.745135538 | 0.895359858 | 1.697918725 | 0.101671955 |
| NEB       | 4703     | 26202 | 0.132606857 | 0.119061812 | 0.249974338 | 0.270399596 |
| TRIM71    | 131405   | 3138  | 1.107254575 | 0.639099478 | 3.231889275 | 1.677230859 |
| SLC37A3   | 84255    | 3335  | 1.041848533 | 0.066816397 | 0.950306273 | 0.06069831  |
| ZNF71     | 58491    | 3144  | 1.105141494 | 1.488386253 | 1.008037984 | 0.708243477 |
| CLIP3     | 25999    | 3473  | 1.000450578 | 0.898260175 | 1.338400446 | 0.990869758 |
| REEP2     | 51308    | 2117  | 1.641268237 | -           | 2.095880958 | 0.095620625 |
| MGC23270  | 196872   | 2518  | 1.379890729 | 1.061950841 | 1.17473656  | 0.080392718 |
| SPSB2     | 84727    | 1272  | 2.731576145 | 2.97810978  | 0.664417489 | 1.909706254 |
| C16orf91  | 283951   | 1071  | 3.24422489  | 3.328966345 | 2.761892305 | 1.890092091 |
| SLC35G1   | 159371   | 2428  | 1.431039892 | 1.009538522 | 0.609140581 | 0.166745357 |
| ZNF772    | 400720   | 5434  | 0.639412009 | 0.615106785 | 0.505465936 | 0.596036402 |

|           |          |       |             |             |             |             |
|-----------|----------|-------|-------------|-------------|-------------|-------------|
| SEPT1     | 1731     | 1602  | 2.168891921 | 5.007476062 | 4.220419703 | 12.00420848 |
| DNAJC27-A | 729723   | 4695  | 0.740056413 | 0.806848912 | 0.540024949 | 0.646737581 |
| EMP2      | 2013     | 5186  | 0.669989367 | 1.031234947 | 0.89631021  | 0.702606929 |
| IFT20     | 90410    | 1016  | 3.4198473   | 2.193235086 | 3.119361634 | 3.586338123 |
| THAP8     | 199745   | 1825  | 1.791878734 | 1.587301316 | 2.31544944  | 2.551158273 |
| TOX2      | 84969    | 2558  | 1.27841231  | 0.784008664 | 1.651952786 | 1.503576386 |
| ZNF554    | 115196   | 3698  | 0.884310083 | 1.325667676 | 1.142697465 | 1.040061762 |
| AP4S1     | 11154    | 1797  | 1.819798936 | 2.728057354 | 2.469104056 | 4.843873738 |
| GNG7      | 2788     | 4264  | 0.76692746  | 0.627108869 | 1.635177562 | 0.427265424 |
| CCDC122   | 160857   | 2024  | 1.615700933 | 2.091808799 | 1.148286747 | 1.600228166 |
| PCBP1-AS1 | 400960   | 2396  | 1.364849202 | 1.302027373 | 1.322734316 | 1.520751057 |
| RUNDC2C   | 440352   | 5832  | 0.560730228 | 0.878798311 | 0.760799038 | 0.867750613 |
| KIAA1257  | 57501    | 1730  | 1.890276699 | 1.674465261 | 2.320468477 | 1.287119938 |
| ZNF354A   | 6940     | 2555  | 1.279913381 | 0.43607179  | 0.496167737 | 0.396142589 |
| IL23R     | 149233   | 2826  | 1.157175757 | 0.709658232 | 1.046704409 | 1.146094058 |
| ZNF771    | 51333    | 1473  | 2.220080576 | 1.664059424 | 1.290945589 | 0.549704991 |
| PHLDB1    | 23187    | 5695  | 0.574219261 | 0.039127776 | 0.519400643 | 0.355450154 |
| PALM      | 5064     | 2890  | 1.131549719 | 0.385523676 | 0.950415882 | 0.140089179 |
| MYLK2     | 85366    | 2793  | 1.17084808  | 0.478695349 | 0.680831669 | 0.289908862 |
| ABCC2     | 1244     | 5051  | 0.647431932 | 0.705864771 | 1.254908501 | 0.480923848 |
| RAB11FIP4 | 84440    | 8665  | 0.377400887 | 0.617193818 | 0.243837001 | 2.149273559 |
| SMAD6     | 4091     | 3018  | 1.083558214 | 2.731878507 | 2.520295364 | 1.073181513 |
| TMEM71    | 137835   | 2105  | 1.553529068 | 2.22303391  | 1.104100891 | 2.404143265 |
| UNC80     | 285175   | 13562 | 0.241128056 | 0.246459982 | 0.124633394 | 0.238818892 |
| C5orf56   | 441108   | 2233  | 1.464477693 | 9.080955805 | 0.662334675 | 23.11659653 |
| HSF4      | 3299     | 2622  | 1.247207738 | 1.359772294 | 1.289304417 | 0.617631924 |
| MPP2      | 4355     | 4412  | 0.741200972 | 0.353542338 | 1.053550487 | 0.183525714 |
| DKFZP434I | 54553    | 3074  | 1.063818702 | 1.087342313 | 1.580855404 | 1.580446555 |
| NPTXR     | 23467    | 5831  | 0.560826391 | 0.343936574 | 0.615990558 | 0.347159772 |
| FLJ23867  | 200058   | 2717  | 1.203599076 | 0.41007119  | 0.699875912 | 1.415586454 |
| EFCAB5    | 374786   | 5147  | 0.635356264 | 0.649405532 | 0.533651039 | 1.573179428 |
| CCDC78    | 124093   | 1611  | 2.029906076 | 1.521514297 | 2.22957228  | 0.376962501 |
| METTL12   | 751071   | 1382  | 2.366265332 | 1.934871358 | 1.987483283 | 1.025327092 |
| SLC45A4   | 57210    | 3376  | 0.968654825 | 1.650123554 | 0.938765231 | 1.139261966 |
| ADCK5     | 203054   | 1969  | 1.660832244 | 2.716091637 | 2.360723591 | 1.542119322 |
| C9orf9    | 11092    | 726   | 4.504378359 | 1.227728291 | 3.201284263 | 1.67296581  |
| FAM22G    | 441457   | 4194  | 0.77972787  | 0.690706939 | 0.705290095 | 0.675728203 |
| IGDCC4    | 57722    | 6485  | 0.504268109 | 0.137444987 | 0.423546939 | 0.124859746 |
| HAVCR2    | 84868    | 2338  | 1.398707737 | 2.668654907 | 3.614794891 | 59.65504131 |
| FAM172BF  | 131909   | 5009  | 0.652860589 | 0.889729226 | 1.096706687 | 0.727434524 |
| PCDHB9    | 56127    | 4220  | 0.77492386  | 1.214490936 | 0.350472353 | 0.719533873 |
| LOC22144I | 221442   | 4585  | 0.713234174 | 0.680405144 | 0.322572155 | 0.397352185 |
| HOXC4     | 3221     | 2300  | 1.421816821 | 0.775070208 | 0.275588819 | 0.176025098 |
| SMCR7     | 125170   | 2610  | 1.252942026 | 1.878283166 | 1.538088301 | 1.861414832 |
| CELSR3    | 1951     | 11974 | 0.273106622 | 0.279145672 | 0.141162359 | 0.253585514 |
| DCHS1     | 8642     | 10759 | 0.3039482   | 1.201254365 | 0.373121151 | 0.677334238 |
| CRISPLD2  | 83716    | 4607  | 0.709828237 | 0.483682841 | 0.963095287 | 1.098485256 |
| PTS       | 5805     | 948   | 3.449555579 | 2.115500172 | 5.126107079 | 2.56239067  |
| RNASEK    | 440400   | 1047  | 3.123379836 | 5.959231302 | 3.228802466 | 10.44045712 |
| ZNF446    | 55663    | 1995  | 1.639187313 | 2.792389533 | 1.48270008  | 1.014681017 |
| SV2B      | 9899     | 11361 | 0.287842504 | 0.23536592  | 0.185973736 | 0.195996611 |
| GLB1L     | 79411    | 2505  | 1.305460554 | 1.334327454 | 1.265178212 | 1.131338955 |
| ZNF726    | 730087   | 622   | 5.257522008 | 5.015526666 | 5.095291673 | 3.57993166  |
| BBS12     | 166379   | 3451  | 0.947603213 | 0.645704679 | 1.346932701 | 0.938528487 |
| C1orf130  | 400746   | 3991  | 0.819388296 | 1.00500835  | 0.741164284 | 1.065148114 |
| MCF2L2    | 23101    | 4772  | 0.685284721 | 0.373566948 | 0.221379675 | 0.424201305 |
| TNN       | 63923    | 5008  | 0.652990952 | 0.667430166 | 0.928167881 | 2.344423732 |
| C16orf95  | 1.01E+08 | 1156  | 2.828874298 | 2.313142056 | 2.010495134 | 0.875557366 |
| LAPTM4B   | 55353    | 2242  | 1.45859888  | 0.795121087 | 2.355985296 | 2.798971789 |
| BMS1P1    | 728053   | 4234  | 0.772361523 | 0.578922894 | 0.598823131 | 0.334672187 |
| FAM169A   | 26049    | 5942  | 0.55034983  | 0.300010346 | 0.391136381 | 0.170337313 |
| SYTL2     | 54843    | 4807  | 0.68029513  | 0.370846989 | 0.615349835 | 0.67378028  |

|           |          |      |             |             |             |             |
|-----------|----------|------|-------------|-------------|-------------|-------------|
| CYB561    | 1534     | 3173 | 1.030626753 | 0.772505368 | 2.330591443 | 1.594932737 |
| RPPH1     | 85495    | 341  | 9.589966829 | 5.22774627  | 13.63127493 | 6.529963321 |
| C9orf85   | 138241   | 1328 | 2.462483952 | 6.376236461 | 1.909199651 | 6.859411772 |
| BANK1     | 55024    | 3455 | 0.946506133 | 1.99936707  | 0.794993313 | 3.573997291 |
| BCL2L15   | 440603   | 4986 | 0.65587218  | 0.893833473 | 0.678009663 | 0.811989021 |
| CD300LB   | 124599   | 2326 | 1.40592377  | 29.21924714 | 1.544213647 | 49.34529892 |
| BCO2      | 83875    | 2912 | 1.123000923 | 1.300877624 | 1.015792122 | 0.834184875 |
| MEX3B     | 84206    | 3398 | 0.962383369 | 0.1311552   | 1.367941363 | 0.178718831 |
| DNM1P35   | 1E+08    | 7300 | 0.447969683 | 0.45787538  | 0.57886236  | 0.499139662 |
| C9orf95   | 54981    | 1476 | 2.215568217 | 2.113589151 | 2.576643431 | 3.840113931 |
| WASH2P    | 375260   | 1975 | 1.655786678 | 2.256533516 | 1.390735138 | 1.947416909 |
| HNRNPH2   | 3188     | 2392 | 1.367131559 | 1.024732246 | 1.413275996 | 0.846274511 |
| ZNF688    | 146542   | 1839 | 1.77823746  | 3.271605486 | 1.723366732 | 3.632491831 |
| JOSD2     | 126119   | 788  | 4.149972955 | 5.655651897 | 4.826301655 | 9.76179796  |
| TBC1D10A  | 83874    | 2038 | 1.604601908 | 1.530744645 | 2.384469829 | 1.887217074 |
| RPL23AP6  | 649946   | 641  | 5.101682822 | 4.866860509 | 1.31846965  | 3.158016583 |
| TFAP2C    | 7022     | 2895 | 1.129595402 | 0.615772531 | 0.437895878 | 0.769159756 |
| LOC43999  | 439994   | 1179 | 2.773688455 | 2.835021434 | 2.329687784 | 2.403735438 |
| PNMA2     | 10687    | 4846 | 0.6748202   | 0.781707726 | 0.697597231 | 0.292406529 |
| C11orf67  | 28971    | 557  | 5.871056892 | 3.60052812  | 5.68989483  | 2.180562258 |
| LOC72923  | 729234   | 852  | 3.838237898 | 2.353866388 | 3.471815328 | 1.425555373 |
| ZNF600    | 162966   | 2548 | 1.283429627 | 1.136901453 | 1.824279729 | 2.145046821 |
| DAB2      | 1601     | 4597 | 0.666911577 | 0.290841007 | 0.505575892 | 1.277014798 |
| IGSF10    | 285313   | 8571 | 0.357693679 | 0.285982911 | 0.813487006 | 0.401503987 |
| C2orf55   | 343990   | 3884 | 0.78933896  | 0.803207412 | 0.489588788 | 0.833898509 |
| PLEKHA4   | 57664    | 3104 | 0.987690889 | 1.220410967 | 1.089096708 | 13.95611362 |
| LOC10013  | 1E+08    | 2620 | 1.170149817 | 0.510303858 | 0.64514431  | 0.618103398 |
| ABAT      | 18       | 5586 | 0.548835038 | 1.874890115 | 0.869951577 | 2.319270897 |
| CCDC159   | 126075   | 1080 | 2.838696778 | 5.983470238 | 5.477753072 | 8.059667692 |
| SMAD9     | 4093     | 5592 | 0.548246159 | 0.478181727 | 0.340050582 | 0.07239945  |
| OVGP1     | 5016     | 2258 | 1.357746909 | 0.296057597 | 1.590717867 | 0.896496293 |
| FUT1      | 2523     | 4246 | 0.722042515 | 0.472325521 | 1.094739696 | 1.382580552 |
| GPR141    | 353345   | 918  | 3.339643269 | 4.854742587 | 3.682523074 | 9.040940502 |
| LOC25412  | 254128   | 1841 | 1.66528654  | 2.90493451  | 1.491961922 | 2.41903041  |
| SNX22     | 79856    | 3614 | 0.84831005  | 0.80155642  | 1.169257119 | 1.008223446 |
| LOC10012  | 1E+08    | 1053 | 2.911483875 | 0.423233969 | 2.608453844 | 0.768960543 |
| CCDC147   | 159686   | 3313 | 0.92538259  | 3.632044967 | 0.573970073 | 4.399299165 |
| CCDC30    | 728621   | 3098 | 0.989603783 | 1.294702494 | 1.432207872 | 1.110810416 |
| C2orf76   | 130355   | 950  | 3.227150022 | 3.04928937  | 0.889620048 | 1.704664109 |
| ZNF790    | 388536   | 3047 | 1.006167549 | 0.585054637 | 0.970786564 | 0.398612792 |
| GPR161    | 23432    | 2733 | 1.121768211 | 0.407670481 | 1.700792078 | 0.592546983 |
| BEND6     | 221336   | 2727 | 1.124236348 | 0.490280935 | 1.084703579 | -           |
| P2RX5-TAX | 1.01E+08 | 6285 | 0.48779515  | 0.602729617 | 0.336173049 | 0.547540282 |
| CCT6B     | 10693    | 1898 | 1.615275301 | 2.582886757 | 0.890557477 | 0.959883966 |
| WNT3      | 7473     | 1506 | 2.035718805 | 0.88777962  | 3.086497178 | 0.537659663 |
| FLVCR1-AS | 642946   | 942  | 3.254556816 | 5.913818597 | 2.018644217 | 2.793604266 |
| SLC4A8    | 9498     | 5218 | 0.587541687 | 1.067615393 | 0.526389785 | 1.435390558 |
| FAM158A   | 51016    | 896  | 3.421643438 | 3.979155085 | 5.895222136 | 1.807400562 |
| ABTB1     | 80325    | 2020 | 1.51771907  | 2.316577416 | 2.928699662 | 13.52866163 |
| RPL23AP8  | 284942   | 1520 | 2.016968764 | 1.319404054 | 0.973021927 | 0.399530651 |
| ZNF620    | 253639   | 2288 | 1.339944284 | 2.240013876 | 1.846894767 | 1.857957221 |
| MYO6      | 4646     | 8662 | 0.353935872 | 0.18007721  | 0.682980064 | 0.584244005 |
| C6orf52   | 347744   | 701  | 4.373455807 | 2.225148064 | 6.630905492 | 0.288771559 |
| TBC1D19   | 55296    | 2204 | 1.39101294  | 1.516556384 | 0.862778064 | 0.183692253 |
| ZNHIT2    | 741      | 1321 | 2.320811901 | 3.036327271 | 3.83863306  | 1.072673763 |
| PDE6A     | 5145     | 5659 | 0.541755172 | 1.023793922 | 0.522704835 | 0.608109325 |
| C5orf27   | 202299   | 1931 | 1.587670907 | 1.961758488 | 1.750676428 | 6.918852903 |
| FGF11     | 2256     | 2763 | 1.109588317 | 1.612976364 | 1.299978626 | 2.564245459 |
| C6orf225  | 619208   | 2682 | 1.143099374 | 0.747760687 | 0.630230459 | 0.075476832 |
| EDA       | 1896     | 5296 | 0.578888316 | 0.21037829  | 0.119685477 | 0.229337836 |
| LOC38976  | 389765   | 1764 | 1.737977619 | 0.884256685 | 1.077983476 | 0.91804473  |
| C2orf81   | 388963   | 2244 | 1.366217701 | 0.496507765 | 1.129865034 | 0.811880466 |

|          |        |       |             |             |             |             |
|----------|--------|-------|-------------|-------------|-------------|-------------|
| LOC72840 | 728407 | 1420  | 2.159008817 | 1.098470981 | 2.827049624 | 1.710666448 |
| LOXL4    | 84171  | 3657  | 0.83833539  | 0.304665962 | 1.444385845 | 0.166061413 |
| C1orf54  | 79630  | 543   | 5.646026742 | 4.103732684 | 3.891063745 | 4.473566032 |
| ZC3H12B  | 340554 | 7273  | 0.421530664 | 0.551490214 | 0.639112436 | 0.528825574 |
| KIAA1462 | 57608  | 9300  | 0.32965511  | 0.694854608 | 0.29534429  | 0.108832722 |
| PLEKHH1  | 57475  | 6540  | 0.468775615 | 0.306650484 | 0.839969999 | 0.650000936 |
| TRIM7    | 81786  | 3026  | 1.013150205 | 0.883672246 | 0.41893872  | 0.468275625 |
| LINGO3   | 645191 | 2130  | 1.439339212 | 1.255395407 | 1.983894473 | 1.900740497 |
| ADA      | 100    | 1566  | 1.957721916 | 16.07924226 | 1.753960343 | 11.89237254 |
| PORCN    | 64840  | 1867  | 1.642095619 | 2.14836011  | 2.263361129 | 1.734794755 |
| PLEKHM1  | 440456 | 2922  | 1.049210308 | 2.821632216 | 1.952323257 | 5.195812704 |
| LOC72875 | 728758 | 2366  | 1.295770296 | 1.412717782 | 1.428806501 | 1.625591038 |
| KRT8     | 3856   | 1802  | 1.701327703 | 2.844146365 | 1.524251886 | 3.482405523 |
| CASS4    | 57091  | 3179  | 0.964388965 | 1.542094704 | 1.860954174 | 3.565906362 |
| RSG1     | 79363  | 1582  | 1.937921947 | 1.971970661 | 2.136887599 | 0.895702933 |
| ABCB9    | 23457  | 3814  | 0.803826041 | 1.3437734   | 0.830957373 | 1.00842905  |
| SHOX     | 6473   | 3757  | 0.816021432 | -           | -           | 0.808206799 |
| C2orf132 | 140699 | 3481  | 0.880721781 | 0.512111887 | 0.971145125 | 0.407067521 |
| PPAP2A   | 8611   | 1641  | 1.868246509 | 1.629489468 | 1.931304948 | 0.616785079 |
| HEG1     | 57493  | 9156  | 0.334839725 | 0.09734936  | 0.161532692 | 0.132653252 |
| NBEA     | 26960  | 11140 | 0.275205792 | 0.380055746 | 0.379326322 | 0.181713522 |
| CCDC169  | 728591 | 1199  | 2.556957899 | 2.044336557 | 1.938392306 | 0.675325648 |
| METRN    | 79006  | 1109  | 2.764465754 | 2.210243041 | 1.905182699 | 0.547598367 |
| TMEM56   | 148534 | 6921  | 0.442969588 | 0.450752433 | 0.488449094 | 0.789709478 |
| SPHAR    | 10638  | 1135  | 2.701138785 | 0.981641783 | 2.047693722 | 0.713405684 |
| FGL2     | 10875  | 4268  | 0.718320647 | 3.498076354 | 1.980175833 | 41.73790989 |
| NINJ2    | 4815   | 1073  | 2.857215769 | 22.84398446 | 3.34747525  | 17.73374941 |
| PTGIS    | 5740   | 5603  | 0.547169823 | 0.556783435 | 0.490219864 | 0.469672536 |
| HDHD3    | 81932  | 1787  | 1.715608573 | 2.992716527 | 2.128218078 | 6.230323146 |
| PTPRU    | 10076  | 5632  | 0.544352365 | 0.15826185  | 0.487695649 | 1.689303366 |
| SWT1     | 54823  | 3871  | 0.791989801 | 2.24502059  | 1.364536046 | 2.876152793 |
| RRN3P1   | 730092 | 1628  | 1.883164939 | 0.958125794 | 1.687163328 | 1.243420534 |
| C14orf33 | 1E+08  | 1512  | 2.027640556 | 0.589504457 | 1.11790879  | 0.133881523 |
| POMZP3   | 22932  | 1564  | 1.960225397 | 2.137142117 | 3.782591636 | 1.035441754 |
| LOC38815 | 388152 | 3356  | 0.913525781 | 0.265593188 | 0.692530505 | 0.060318493 |
| LOC40105 | 401052 | 1897  | 1.61612679  | 1.174658328 | 1.002405299 | 0.85367997  |
| MMRN2    | 79812  | 4195  | 0.730820625 | 0.053118638 | 1.762804922 | 0.820331507 |
| TGFA     | 7039   | 4264  | 0.718994494 | 3.605875996 | 1.486525056 | 5.696872316 |
| LOC15368 | 153684 | 2261  | 1.355945387 | 4.533526536 | 1.86894968  | 5.550902036 |
| PFKM     | 5213   | 3536  | 0.867022772 | 0.693201225 | 0.478019822 | 0.801471742 |
| TCTEX1D2 | 255758 | 695   | 4.41121226  | 2.885603112 | 3.34407536  | 1.165058204 |
| RPS15AP1 | 728963 | 914   | 3.354258775 | 2.925593235 | 2.080484521 | 4.208039821 |
| FLJ39534 | 285352 | 2540  | 1.207004929 | 0.789564631 | 0.748646792 | 1.036053236 |
| CDK20    | 23552  | 2406  | 1.27422798  | 0.833538721 | 0.878157778 | 1.177890308 |
| MERTK    | 10461  | 3632  | 0.84410587  | 19.44877783 | 1.803366631 | 88.729832   |
| IL3RA    | 3563   | 1726  | 1.776241321 | 0.516414101 | 3.794801624 | 9.265283994 |
| MFGE8    | 4240   | 2005  | 1.529073576 | 1.44480045  | 2.5290944   | 2.019240528 |
| LOC64417 | 644172 | 2305  | 1.330061831 | 1.256757007 | 1.00830038  | 1.40514612  |
| LOC10013 | 1E+08  | 1796  | 1.707011426 | 1.61293146  | 1.411702192 | 1.577953275 |
| FLJ37453 | 729614 | 2732  | 1.122178814 | 1.468150924 | 1.237392453 | 0.740954842 |
| F5       | 2153   | 9179  | 0.33400071  | 3.10737375  | 0.41432898  | 3.881411905 |
| PRPF40B  | 25766  | 3698  | 0.829040703 | 1.265410054 | 0.685618479 | 1.040061762 |
| ABHD6    | 57406  | 2413  | 1.270531505 | 0.646427183 | 1.05073234  | 1.174473304 |
| CD300LF  | 146722 | 1759  | 1.742917863 | 11.14796831 | 3.002910196 | 37.17141713 |
| RGS5     | 8490   | 5927  | 0.517258735 | 0.225577207 | 0.142591369 | 0.239075762 |
| ALDH8A1  | 64577  | 2567  | 1.194309513 | 0.434033278 | 0.823080488 | 0.473148881 |
| LOC44242 | 442421 | 3705  | 0.827474365 | 0.781869069 | 0.74135004  | 0.710276712 |
| C5orf54  | 63920  | 2808  | 1.091806453 | 0.872920061 | 1.053414052 | 0.720900509 |
| DOCK4    | 9732   | 8343  | 0.367468839 | 0.694432435 | 0.709094249 | 3.688024352 |
| FLJ13197 | 79667  | 2368  | 1.294675896 | 1.129219686 | 1.249149772 | 1.367762588 |
| AKD1     | 221264 | 6326  | 0.484633658 | 0.598823212 | 0.868385045 | 0.607990578 |
| PLK3     | 1263   | 2369  | 1.294129388 | 6.960581963 | 2.229683003 | 25.20747766 |



|           |          |       |             |             |             |             |
|-----------|----------|-------|-------------|-------------|-------------|-------------|
| MRGPRX3   | 117195   | 1660  | 1.846862964 | 1.342365571 | 1.272799767 | 1.951121571 |
| VWCE      | 220001   | 3536  | 0.867022772 | 0.693201225 | 0.5377723   | 1.030463669 |
| SNX24     | 28966    | 2140  | 1.432613327 | 0.624764537 | 2.073355135 | 0.378371706 |
| ZNF524    | 147807   | 1135  | 2.701138785 | 3.533910419 | 2.047693722 | 1.783514211 |
| SHISA2    | 387914   | 2889  | 1.061195057 | 0.462788546 | 0.43880532  | 0.350344173 |
| GGT5      | 2687     | 2500  | 1.226317008 | 1.960927626 | 0.676111236 | 0.971658542 |
| SNX21     | 90203    | 3184  | 0.962874535 | 0.769836536 | 0.597224514 | 1.271538084 |
| DEM1      | 64789    | 2217  | 1.382856347 | 2.110729084 | 2.191948359 | 1.460920978 |
| CARD16    | 114769   | 758   | 3.774942418 | 7.643337471 | 3.90235707  | 32.04678569 |
| LOC59510  | 595101   | 4301  | 0.66528862  | 0.466285553 | 0.7368685   | 0.470655343 |
| C16orf93  | 90835    | 1575  | 1.816765938 | 2.688140324 | 0.536596219 | 2.570525244 |
| POU5F1    | 5460     | 1743  | 1.641655968 | 2.429042461 | 2.424380509 | 1.625934642 |
| NPR3      | 4883     | 7450  | 0.38408139  | 0.089731282 | 0.311964077 | 0.163029957 |
| BATF3     | 55509    | 992   | 2.88448221  | 0.89851889  | 2.555864049 | 2.856858953 |
| MID1      | 4281     | 6463  | 0.442736555 | 0.310303909 | 0.392297251 | 0.093963576 |
| KLRG1     | 10219    | 1815  | 1.576532426 | 2.946547897 | 3.143079095 | 2.899807403 |
| TMEM81    | 388730   | 1350  | 2.119560261 | 1.65061248  | 2.34760846  | 0.749736529 |
| IL17D     | 53342    | 1873  | 1.527712949 | 1.189710009 | 1.692082979 | 0.108077343 |
| LOC149134 | 149134   | 1123  | 2.548002095 | 0.595278766 | 2.822147302 | 1.442057795 |
| TMEM234   | 56063    | 1108  | 2.582496708 | 4.826700753 | 3.623114139 | 2.740462946 |
| ZNF443    | 10224    | 2736  | 1.045835655 | 0.570112863 | 1.081135475 | 0.59189726  |
| SLC2A4    | 6517     | 3159  | 0.905794983 | 0.352694974 | 0.869484615 | 0.128160091 |
| HSD17B13  | 345275   | 2395  | 1.194741692 | 0.837367083 | 0.793971963 | 1.183300243 |
| TAS2R20   | 259295   | 1914  | 1.494987645 | 0.582112552 | 0.662334675 | 0.740335444 |
| ACY1      | 95       | 1678  | 1.705248124 | 0.796779564 | 0.629573186 | 0.241273973 |
| LOC348840 | 348840   | 2925  | 0.978258582 | 0.914185373 | 0.650106958 | 0.484445142 |
| ZNF506    | 440515   | 3341  | 0.856452066 | 0.400178422 | 0.632399765 | 0.727071642 |
| CCDC165   | 23255    | 6092  | 0.469699007 | 0.073155839 | 0.416187974 | 0.066457276 |
| UCKL1-AS1 | 1E+08    | 3571  | 0.801289934 | 0.873608957 | 0.650835165 | 1.020363913 |
| DEPTOR    | 64798    | 2631  | 1.08757368  | 0.254085159 | 1.445505779 | -           |
| PPP1R32   | 220004   | 1558  | 1.836589443 | 0.858148978 | 1.356128122 | 2.07885867  |
| COL11A2   | 1302     | 6425  | 0.445355074 | 0.277457039 | 0.29596309  | 0.598622318 |
| PLA2G15   | 23659    | 2764  | 1.035241083 | 1.289914239 | 1.070183306 | 1.17180239  |
| FAM90A1   | 55138    | 2516  | 1.137283924 | 0.354265    | 0.671811642 | 0.56319636  |
| IL10RA    | 3587     | 3802  | 0.752605564 | 1.523842663 | 2.222880183 | 20.4984514  |
| C17orf104 | 284071   | 4688  | 0.610368249 | 0.237662846 | 0.405623475 | 0.215901091 |
| RNU2-1    | 6066     | 188   | 15.22024656 | 14.22336286 | 10.11469602 | 17.22798834 |
| LMF1      | 64788    | 2927  | 0.977590144 | 2.055511612 | 0.721847494 | 1.314024051 |
| SMPD3     | 55512    | 5269  | 0.543064406 | 0.253747601 | 0.481195129 | 0.883633298 |
| LOC100303 | 1E+08    | 2456  | 1.165067733 | 0.544379523 | 1.204391962 | 0.90664393  |
| ADRB1     | 153      | 2862  | 0.999792576 | 0.545013555 | 0.516769158 | 2.687734728 |
| ASMT      | 438      | 1378  | 2.076492273 | 2.263902457 | 1.68659824  | 2.64420866  |
| DZANK1    | 55184    | 3515  | 0.814055861 | 0.760737473 | 0.360656776 | 0.748670048 |
| ZNF826P   | 664701   | 636   | 4.499066592 | 3.153292709 | 3.654296187 | 1.909706254 |
| TBX19     | 9095     | 2882  | 0.99285439  | 1.159781496 | 0.65980668  | 2.528604811 |
| P2RY1     | 5028     | 3122  | 0.916529902 | 1.57024954  | 0.541408741 | 1.231950159 |
| MTMR11    | 10903    | 2879  | 0.993888973 | 1.315788691 | 0.440329478 | 5.27341602  |
| TIGD2     | 166815   | 2101  | 1.361925917 | 1.060602974 | 1.206766843 | 1.252534611 |
| TMEM8B    | 51754    | 3747  | 0.763652616 | 0.11893925  | 0.676652558 | 0.270121248 |
| LOC100507 | 1.01E+08 | 4093  | 0.69909757  | 0.707751014 | 0.619452025 | 0.741859991 |
| ZNF823    | 55552    | 2414  | 1.185338174 | 1.476935773 | 1.750495123 | 0.670849587 |
| PTPN14    | 5784     | 13443 | 0.212854746 | 0.331522257 | 0.251473345 | 0.316224513 |
| LOC90834  | 90834    | 2421  | 1.181910926 | 1.288582233 | 2.094520559 | 1.505047308 |
| SHB       | 6461     | 6021  | 0.475237727 | 0.259064739 | 0.666734839 | 1.311198415 |
| KCNIP4    | 80333    | 2424  | 1.180448165 | 0.919276752 | 0.697309443 | 0.334041028 |
| TLR10     | 81793    | 3990  | 0.717144449 | 0.446782325 | 0.529535743 | 1.16688317  |
| IMMP1L    | 196294   | 795   | 3.599253274 | 3.924097593 | 3.189203945 | 1.527765003 |
| EFCAB11   | 90141    | 695   | 4.117131443 | 7.374319063 | 5.472123316 | 4.368968265 |
| KHK       | 3795     | 2433  | 1.176081526 | 0.274762867 | 1.823666251 | 0.332805364 |
| BSN       | 8927     | 15964 | 0.17924119  | 0.237293638 | 0.145585842 | 0.177524686 |
| PDGFA     | 5154     | 2809  | 1.018656587 | 0.158656237 | 1.053039038 | 0.288257548 |
| ART3      | 419      | 1598  | 1.790617242 | 0.697223669 | 0.264436497 | 0.633381924 |

|           |          |       |             |             |             |             |
|-----------|----------|-------|-------------|-------------|-------------|-------------|
| ZNF552    | 79818    | 2352  | 1.216584334 | 2.179061118 | 1.527143258 | 2.409867416 |
| FRMD4A    | 55691    | 6804  | 0.420547671 | 0.556754209 | 0.434742307 | 0.297514496 |
| IFI44     | 10561    | 1742  | 1.642598365 | 2.174601401 | 0.121288612 | 255.0696637 |
| CDKL5     | 6792     | 3434  | 0.833257528 | 0.908461732 | 1.230546077 | 1.355813584 |
| TGM2      | 7052     | 3937  | 0.726798667 | 1172.970424 | 0.965995861 | 2786.957495 |
| RYR3      | 6263     | 15563 | 0.183859561 | 0.100226742 | 0.135760947 | 0.039021178 |
| ZNF34     | 80778    | 1943  | 1.472674397 | 1.376218331 | 1.41363968  | 1.250203991 |
| LOC10027  | 1E+08    | 3285  | 0.871052162 | 0.746167285 | 0.90045256  | 0.246488722 |
| ZNF503-AS | 1E+08    | 2478  | 1.154724113 | 0.539546452 | 1.449491906 | 0.980285051 |
| EPHB3     | 2049     | 4234  | 0.675816333 | 0.210517416 | 0.998038552 | 0.095620625 |
| TMC8      | 147138   | 4419  | 0.647523501 | 12.95949309 | 1.19531999  | 17.95702971 |
| HARBI1    | 283254   | 1530  | 1.87020023  | 1.602065054 | 1.519040768 | 2.249209588 |
| TREX1     | 11277    | 1835  | 1.559349511 | 2.064389995 | 1.957406509 | 21.95277587 |
| LOC28387  | 283875   | 3221  | 0.888359625 | 0.830174547 | 0.787152169 | 1.256931779 |
| FSTL3     | 10272    | 2525  | 1.133230239 | 1.588510228 | 1.255156998 | 0.72152862  |
| AVIL      | 10677    | 3163  | 0.904649495 | 0.774947686 | 0.868385045 | 1.023984131 |
| LOC28569  | 285696   | 3316  | 0.862909033 | 0.604793173 | 0.892034578 | 0.915691479 |
| OLFML2A   | 169611   | 6556  | 0.436456125 | 0.305902099 | 0.322276939 | 0.308768857 |
| AMIGO3    | 386724   | 3008  | 0.95126541  | 1.555680312 | 1.966746449 | 1.480530248 |
| NUDT18    | 79873    | 1519  | 1.883743484 | 4.694302773 | 1.94732499  | 4.93078863  |
| LOC10050  | 1.01E+08 | 2785  | 1.027434956 | 1.280187776 | 1.21384423  | 1.235651946 |
| OPLAH     | 26873    | 4052  | 0.70617136  | 2.584683165 | 1.460013158 | 2.797634829 |
| IL12RB1   | 3594     | 2100  | 1.362574454 | 2.864991661 | 1.408565076 | 6.362049979 |
| C8orf55   | 51337    | 2264  | 1.263872064 | 2.263759606 | 2.333091446 | 1.251768587 |
| SLC6A20   | 54716    | 5455  | 0.524547452 | 1.021231369 | 0.774646238 | 0.667959584 |
| GUSBP2    | 387036   | 1200  | 2.384505294 | 0.742775616 | 2.464988883 | 0.674762877 |
| IL28RA    | 163702   | 4563  | 0.627088835 | 0.879024397 | 0.41673523  | 0.576720407 |
| PRR22     | 163154   | 1407  | 2.033693214 | 1.266994654 | 2.703003344 | 0.863236089 |
| ANKAR     | 150709   | 4443  | 0.644025738 | 0.351075578 | 0.332881686 | 0.227806508 |
| CFP       | 5199     | 1785  | 1.603028769 | 40.69661357 | 2.840803514 | 37.65063445 |
| LOC44029  | 440297   | 6807  | 0.420362326 | 0.229150697 | 0.217275353 | 0.327121712 |
| LOC64567  | 645676   | 1987  | 1.44006359  | 2.018615161 | 1.595003231 | 2.34316248  |
| LGALSL    | 29094    | 3842  | 0.744770003 | 0.579991371 | 0.65992117  | 0.526884078 |
| DUSP5     | 1847     | 2545  | 1.124324697 | 3.677395976 | 2.24152792  | 67.92701335 |
| H3F3A     | 3020     | 1077  | 2.656830411 | 6.620841144 | 7.062443277 | 6.014599456 |
| TACC2     | 10579    | 9706  | 0.29480799  | 0.045916482 | 0.326527037 | 0.062568163 |
| NFE4      | 58160    | 967   | 2.959055173 | 1.382622656 | 2.621941196 | 3.558728718 |
| HIST1H1C  | 3006     | 732   | 3.909025072 | 1.217664944 | 2.020482691 | 10.50860218 |
| LOC72872  | 728724   | 1164  | 2.45825288  | 1.531496115 | 1.81516118  | 1.217355705 |
| IL17RD    | 54756    | 8736  | 0.327541936 | 0.357103661 | 0.266040794 | 1.529338937 |
| RGS2      | 5997     | 1375  | 2.081022802 | 6.158285106 | 8.758713744 | 21.34704373 |
| ATP6AP1L  | 92270    | 758   | 3.774942418 | 3.527694218 | 1.672438744 | 2.670565474 |
| TGFB1I1   | 7041     | 1813  | 1.465537884 | 0.122908265 | 1.981158821 | 0.223308178 |
| ZBED3     | 84327    | 1437  | 1.849005    | 0.310135956 | 0.441095535 | 1.267821689 |
| PAG1      | 55824    | 10759 | 0.246957913 | 1.014852826 | 1.315743007 | 6.58519398  |
| LOC10018  | 1E+08    | 1038  | 2.559749696 | 5.366875837 | 3.663897596 | 4.485417965 |
| LOC10013  | 1E+08    | 1568  | 1.694528179 | 2.558028269 | 1.48222728  | 0.645500201 |
| CNR2      | 1269     | 1789  | 1.485198538 | 0.373671355 | 2.243941009 | 4.9786864   |
| CTNND1    | 1500     | 6363  | 0.417573501 | 0.315180601 | 0.298846904 | 0.445388037 |
| LOC10012  | 1E+08    | 5904  | 0.450037294 | 0.377426634 | 0.178933572 | 0.514300973 |
| SPDYE3    | 441272   | 3206  | 0.828764874 | 0.486534246 | 0.724932119 | 0.63140631  |
| LPAL2     | 80350    | 1968  | 1.350111882 | 1.924875834 | -           | -           |
| RTN2      | 6253     | 2317  | 1.146750188 | 2.019631584 | 1.641400822 | 5.067274083 |
| SRR       | 63826    | 2477  | 1.072676699 | 2.338978524 | 1.279479782 | 0.735510604 |
| ASB3      | 51130    | 2456  | 1.081848609 | 0.635109443 | 0.688223978 | 0.659377404 |
| CAPS      | 828      | 1613  | 1.647253679 | 1.105183805 | 0.785932156 | 2.133472207 |
| RHBG      | 57127    | 1928  | 1.378122502 | 0.577885593 | 0.767112723 | 1.154936459 |
| NOS3      | 4846     | 4345  | 0.611512125 | 0.564133379 | 0.583525233 | 0.186355685 |
| SPAG4     | 6676     | 1452  | 1.829903708 | 6.445573526 | 3.201284263 | 6.970690873 |
| ZNF497    | 162968   | 3578  | 0.742599269 | 1.058735506 | 0.944817267 | 0.792063745 |
| DGKB      | 1607     | 6686  | 0.397400566 | 0.83320627  | 0.379212853 | 0.575254023 |
| IGFLR1    | 79713    | 1217  | 2.183254055 | 2.563399824 | 2.604167149 | 8.150381499 |

|           |        |      |             |             |             |             |
|-----------|--------|------|-------------|-------------|-------------|-------------|
| GPR75     | 10936  | 2159 | 1.230671693 | 1.341743817 | 1.076485584 | 0.937604738 |
| MPP7      | 143098 | 5207 | 0.510278507 | 0.556332802 | 0.527501805 | 1.088536233 |
| RAPGEF4   | 11069  | 4361 | 0.609268559 | 0.56206364  | 0.678281738 | 0.557015904 |
| AFF3      | 3899   | 8153 | 0.325894785 | 0.218650985 | 0.259149713 | 0.4717464   |
| MTCP1NB   | 1E+08  | 1042 | 2.549923402 | 2.352360396 | 4.86644364  | 2.525504048 |
| C7orf54   | 27099  | 2569 | 1.034262431 | 0.520434452 | 0.657951768 | 0.551577283 |
| LOC143666 | 143666 | 2078 | 1.278643015 | 0.857873666 | 1.321800721 | 1.266398084 |
| LRRC23    | 10233  | 1822 | 1.458298674 | 0.856108009 | 0.695778577 | 1.55543583  |
| RALGPS1   | 9649   | 6342 | 0.418956194 | 0.491904381 | 0.233206138 | 0.383025285 |
| KLLN      | 1E+08  | 4277 | 0.621234553 | 0.989904375 | 0.642202922 | 1.514548425 |
| ZNF323    | 64288  | 3554 | 0.747614008 | 0.877787728 | 0.891747727 | 0.284790184 |
| PNCK      | 139728 | 1888 | 1.407320013 | 2.124464155 | 2.12627673  | 10.40021171 |
| ZSWIM3    | 140831 | 2986 | 0.889825916 | 2.388026092 | 1.344410739 | 2.304950214 |
| CPT1B     | 1375   | 2951 | 0.900379595 | 0.453065438 | 0.429586096 | 0.548773603 |
| FAM86HP   | 729375 | 2116 | 1.255680617 | 0.421233809 | 0.499255107 | 0.095665814 |
| DEFB1     | 1672   | 484  | 5.489711125 | -           | 2.182693816 | -           |
| PSTPIP2   | 9050   | 3054 | 0.870013158 | 1.021498882 | 0.622646644 | 8.8156643   |
| DDX11L2   | 84771  | 2164 | 1.227828181 | 1.44161626  | 1.073998325 | 0.935438369 |
| IL31RA    | 133396 | 2393 | 1.110330207 | 3.538504814 | 0.794635542 | 3.637459719 |
| ARHGAP24  | 83478  | 4644 | 0.572140436 | 0.335880446 | 0.272977728 | 0.348714665 |
| KCNRG     | 283518 | 1625 | 1.635089344 | 1.782661478 | 1.950320874 | 1.494859296 |
| C2orf15   | 150590 | 1430 | 1.858056073 | 1.40244347  | 2.068522139 | 0.990910518 |
| CHP2      | 63928  | 2391 | 1.111258965 | 1.211553702 | 1.060400308 | 1.523931214 |
| EPS8      | 2059   | 4088 | 0.649956014 | 0.43607179  | 1.188735203 | 0.693249531 |
| IFITM3    | 10410  | 678  | 3.918908827 | 4.2726031   | 4.05118274  | 114.0528402 |
| CIDECP    | 152302 | 803  | 3.30886698  | 4.440003681 | 3.157431054 | 6.050177722 |
| F2R       | 2149   | 3847 | 0.6906733   | 0.753008812 | 0.768907372 | 0.473579352 |
| STARD5    | 80765  | 1344 | 1.976949542 | 1.326385028 | 2.200882931 | 1.807400562 |
| TMEM99    | 147184 | 2083 | 1.27557378  | 1.06976805  | 1.014329147 | 0.29154421  |
| TCN2      | 6948   | 2104 | 1.262842293 | 2.118181414 | 1.606728223 | 11.93021816 |
| TREM1     | 54210  | 948  | 2.802763908 | 2.115500172 | 3.120239092 | 17.08260447 |
| MAPK11    | 5600   | 2420 | 1.097942225 | 0.276238865 | 0.873077526 | 0.08364829  |
| JAK3      | 3718   | 5449 | 0.48761611  | 0.695201989 | 0.387749608 | 0.780144269 |
| LRRK2     | 120892 | 9239 | 0.287587421 | 6.415574645 | 0.823276481 | 28.35187235 |
| ACVR2A    | 92     | 5244 | 0.506678144 | 0.169971537 | 0.443198393 | 0.270213967 |
| ASB16     | 92591  | 2139 | 1.242178674 | 2.083522064 | 1.679215027 | 1.324920094 |
| CBR3      | 874    | 1128 | 2.355514348 | 0.395093413 | 2.435019413 | 0.358916424 |
| C17orf59  | 54785  | 1932 | 1.375269247 | 2.076080914 | 2.405934136 | 3.352859014 |
| STOML1    | 9399   | 2116 | 1.255680617 | 1.158392974 | 0.898659193 | 1.052323957 |
| FKBPL     | 63943  | 1357 | 1.958010453 | 1.149468529 | 2.958298059 | 1.790085745 |
| C19orf20  | 91978  | 1134 | 2.343051309 | 2.947522285 | 2.794771976 | 2.14210437  |
| PGM5P2    | 595135 | 1976 | 1.344645842 | 1.917082814 | 1.176180352 | 1.024437566 |
| CTSW      | 1521   | 1327 | 2.002275949 | 1.175455006 | 4.458156231 | 1.067823693 |
| BLVRA     | 644    | 1094 | 2.428720461 | 1.629489468 | 1.545043959 | 3.700710474 |
| ANKRD9    | 122416 | 1626 | 1.634083754 | 1.918608602 | 1.819179987 | 1.369444952 |
| ZNF530    | 348327 | 2964 | 0.896430562 | 1.278055209 | 1.211822181 | 0.614662539 |
| ZMYND12   | 84217  | 1782 | 1.491032651 | 1.875696    | 1.54135909  | 1.249560882 |
| C9orf103  | 414328 | 977  | 2.719570301 | 4.33349131  | 1.29755227  | 3.315109322 |
| FOXN4     | 121643 | 3356 | 0.791722343 | 0.464788079 | 0.755487824 | 0.060318493 |
| AKR7L     | 246181 | 2332 | 1.139374007 | 0.573325947 | 0.634216694 | 0.260414489 |
| FLVCR2    | 55640  | 3669 | 0.724181026 | 0.182201705 | 1.266902358 | 1.213800759 |
| PAQR7     | 164091 | 3023 | 0.878934894 | 0.51598703  | 0.629031708 | 1.071406486 |
| CLEC12A   | 160364 | 1619 | 1.641148971 | 1.101088004 | 1.435535747 | 0.625166346 |
| SLC16A13  | 201232 | 1770 | 1.501141347 | 3.525036821 | 1.43243906  | 5.260863105 |
| C12orf26  | 84190  | 2105 | 1.262242368 | 2.117175152 | 2.509320206 | 1.730983151 |
| PAPLN     | 89932  | 5849 | 0.454269137 | 0.952439241 | 0.541848422 | 0.62296453  |
| ZNF784    | 147808 | 2006 | 1.324536483 | 2.443828048 | 2.949139241 | 1.816410535 |
| OTUD1     | 220213 | 3125 | 0.850246459 | 0.213919377 | 0.405666742 | 0.518217889 |
| POM121L1  | 646074 | 9547 | 0.278309436 | 0.350108963 | 0.287703142 | 0.233237404 |
| RHPN2     | 85415  | 3546 | 0.749300672 | 0.18852173  | 2.2641909   | 0.171259613 |
| IL18R1    | 8809   | 3522 | 0.75440664  | 2.151138921 | 2.219629804 | 7.299393979 |
| TMED10P1  | 286102 | 4033 | 0.658819783 | 0.221009358 | 0.314333887 | 0.501931225 |

|           |        |       |             |             |             |             |
|-----------|--------|-------|-------------|-------------|-------------|-------------|
| FMO4      | 2329   | 2148  | 1.236974015 | 2.800969501 | 0.983634829 | 5.560196887 |
| CMPK2     | 129607 | 3009  | 0.883024322 | 1.258941722 | 0.280870404 | 52.1377098  |
| TSSK4     | 283629 | 1330  | 1.997759537 | 1.842977092 | 1.588607228 | 1.826425831 |
| EFCAB3    | 146779 | 1694  | 1.568488893 | 0.789253901 | 1.746155053 | 0.358492673 |
| SOX7      | 83595  | 3219  | 0.825417889 | 0.553793563 | 0.328183848 | 0.188656909 |
| NCF1C     | 654817 | 1456  | 1.8248765   | 227.4240175 | 8.706789617 | 449.3475859 |
| LOC100131 | 1E+08  | 1574  | 1.688068732 | 1.274138604 | 1.476577112 | 0.771647508 |
| LOC641298 | 641298 | 5010  | 0.53034335  | 0.4892534   | 0.210863035 | 0.404049627 |
| LOC729799 | 729799 | 2586  | 1.027463335 | 1.034026379 | 0.653626485 | 0.547951292 |
| MMP19     | 4327   | 3262  | 0.81453715  | 0.478181727 | 3.821520822 | 3.909570315 |
| LOC401093 | 401093 | 6669  | 0.398413583 | 0.768503786 | 0.696995764 | 0.273183351 |
| HIVEP3    | 59269  | 8875  | 0.299382556 | 3.866617854 | 0.499941407 | 11.7009585  |
| ZNF286B   | 729288 | 5328  | 0.460329207 | 0.418229513 | 0.356899935 | 0.189967026 |
| C22orf23  | 84645  | 1988  | 1.233719324 | 1.457155383 | 1.169080672 | 1.018253838 |
| TMEM42    | 131616 | 981   | 2.500136612 | 3.634376102 | 3.446030766 | 1.444446525 |
| FBXO27    | 126433 | 2338  | 1.049030803 | 1.429636557 | 0.722958978 | 1.385313006 |
| SLC41A2   | 84102  | 3548  | 0.691272271 | 0.942077303 | 1.13145729  | 2.053956896 |
| SLA2      | 84174  | 2497  | 0.982232285 | 1.963283566 | 1.946155191 | 1.216032417 |
| CYP2E1    | 1571   | 1667  | 1.471286153 | 2.406111773 | 1.267455077 | 1.700062436 |
| UBAC2-AS1 | 1E+08  | 1821  | 1.346861074 | -           | 0.464107109 | 0.222327142 |
| KLHDC8B   | 200942 | 1999  | 1.226930473 | 0.780304549 | 2.219599794 | 6.278433969 |
| GOLGA8G   | 283768 | 5282  | 0.464338133 | 0.08437436  | 0.600013521 | 0.114972849 |
| CCDC144A  | 9720   | 5828  | 0.42083631  | 0.497053003 | 0.47129408  | 0.27787078  |
| LOC441666 | 441666 | 6661  | 0.368208079 | 0.301080042 | 0.222037732 | 0.303901611 |
| KLK1      | 3816   | 874   | 2.80621741  | 3.314444968 | 1.450467469 | 2.547731685 |
| TNFSF13   | 8741   | 2293  | 1.069617975 | 1.554872637 | 1.474294017 | 2.030468316 |
| C1orf56   | 54964  | 2055  | 1.193495872 | 1.084343965 | 1.130964659 | 0.689538706 |
| PRKCE     | 5581   | 5537  | 0.442953588 | 0.52317589  | 0.26711095  | 2.997862879 |
| DCAF4L1   | 285429 | 4772  | 0.513963541 | 0.513654554 | 0.575587154 | 0.381781175 |
| RPS6KL1   | 83694  | 5195  | 0.472114344 | 0.686298933 | 0.447378705 | 0.233796569 |
| KIF13A    | 63971  | 5950  | 0.412207398 | 0.074901743 | 0.213060264 | 0.442281549 |
| MGC21881  | 389741 | 2581  | 0.95026502  | 1.03602953  | 1.146062247 | 0.470582401 |
| PCP2      | 126006 | 720   | 3.406436134 | 4.332857759 | 1.467255287 | 7.591082361 |
| BACE1-AS1 | 1E+08  | 798   | 3.073476211 | 1.116955813 | 1.323839357 | 2.029362035 |
| FAT1      | 2195   | 14773 | 0.166021391 | 0.060335121 | 0.085812534 | -           |
| LOC100091 | 1E+08  | 3470  | 0.706810956 | 0.770602944 | 0.487111842 | 0.700042177 |
| FAM113B   | 91523  | 2091  | 1.17294788  | 1.705080323 | 0.707313883 | 3.581955012 |
| RNF215    | 200312 | 1922  | 1.276084296 | 1.855006741 | 1.868803821 | 1.263863869 |
| DMPK      | 1760   | 3261  | 0.752111014 | 0.136665247 | 0.71270542  | 0.062075702 |
| STS       | 412    | 6377  | 0.384606244 | 0.244602288 | 0.397587759 | 0.412666649 |
| FLJ43681  | 388574 | 2256  | 1.087160468 | 0.790186825 | 1.030200521 | 1.256207483 |
| C4orf19   | 55286  | 3648  | 0.672322921 | 0.733002252 | 0.984605522 | 0.776865154 |
| GMCL1P1   | 64396  | 2923  | 0.839081087 | 0.457405443 | 0.722835311 | 0.207761406 |
| MFNG      | 4242   | 2129  | 1.15201222  | 0.837323381 | 2.381791579 | 5.799981513 |
| EXD3      | 54932  | 2887  | 0.849544169 | 0.617478863 | 0.731848844 | 0.560939004 |
| SLC9A4    | 389015 | 4174  | 0.587597992 | 0.587244737 | 0.607431034 | 0.727463571 |
| CACNA1E   | 777    | 15101 | 0.162415338 | 0.059024617 | 0.069957209 | 0.040214992 |
| MAGEB2    | 4113   | 1628  | 1.506531951 | 0.821250681 | 1.16803615  | 1.492104641 |
| TMPPE     | 643853 | 3985  | 0.615466504 | 1.342028716 | 1.113420323 | 1.930312871 |
| ISYNA1    | 51477  | 2427  | 1.010562018 | 1.009954484 | 0.522335628 | 1.334512488 |
| KIAA1324  | 57535  | 7032  | 0.348781857 | 0.475325693 | 0.420646567 | 0.604523055 |
| LOC100281 | 1E+08  | 1734  | 1.414437149 | 1.799110488 | 2.071419229 | 1.517632767 |
| SPIN2B    | 474343 | 1277  | 1.920621783 | 1.046982074 | 1.158178018 | 1.426671704 |
| DUSP18    | 150290 | 2453  | 0.999850802 | 1.271772355 | 1.291998133 | 2.145597406 |
| TESK2     | 10420  | 3093  | 0.792962825 | 0.936574491 | 1.161280615 | 3.272370885 |
| TSGA10    | 80705  | 3685  | 0.665572325 | 0.665172193 | 0.860046518 | 0.76906488  |
| FHAD1     | 114827 | 5090  | 0.481853441 | 0.262671141 | 0.290568434 | 0.67608854  |
| KIAA1908  | 114796 | 5822  | 0.421270013 | 0.842033505 | 0.181453763 | 0.452005362 |
| ZNF583    | 147949 | 2590  | 0.946962941 | 0.946393642 | 0.978925535 | 0.547105035 |
| BLVRB     | 645    | 874   | 2.80621741  | 1.784701136 | 3.142679517 | 4.863851398 |
| FGD6      | 55785  | 9288  | 0.264064817 | 0.359871907 | 0.432214736 | 1.373063993 |
| LYPD6     | 130574 | 4111  | 0.596602777 | 0.05420401  | 0.565344776 | 0.049240784 |

|           |          |       |             |             |             |             |
|-----------|----------|-------|-------------|-------------|-------------|-------------|
| BOLA2     | 552900   | 1030  | 2.381198074 | 1.298054474 | 0.615392509 | 0.393065753 |
| ITGA2B    | 3674     | 3334  | 0.735643076 | 1.670910953 | 0.633727539 | 4.371589122 |
| LOC14983  | 149837   | 3591  | 0.682994714 | 0.682584108 | 0.411861133 | 0.789196347 |
| DEPDC4    | 120863   | 1155  | 2.123492655 | 0.385857463 | 2.378096881 | 0.701052339 |
| CD69      | 969      | 1676  | 1.463385451 | 2.260236062 | 3.025557442 | 14.49371334 |
| VN1R2     | 317701   | 1311  | 1.870811607 | 2.379601515 | 1.611630521 | 2.316119713 |
| BCAS1     | 8537     | 3475  | 0.705793962 | 0.512996109 | 0.547212332 | 1.048552384 |
| DUSP1     | 1843     | 2040  | 1.202271577 | 0.546158541 | 4.24640942  | 7.442237609 |
| PDE11A    | 50940    | 9285  | 0.264150136 | 0.143995273 | 0.204799446 | 0.130810251 |
| WNT7B     | 7477     | 3928  | 0.624397662 | 0.737480881 | 0.376525797 | 0.566883272 |
| CXorf36   | 79742    | 4735  | 0.517979729 | 0.188243028 | 0.401597223 | 0.299261255 |
| DIO2      | 1734     | 6703  | 0.365900942 | 1.063799181 | 0.252167401 | 0.724793781 |
| LOC10012  | 1E+08    | 2497  | 0.982232285 | 2.052523728 | 2.20000152  | 0.972825933 |
| ANGPTL2   | 23452    | 3572  | 0.686627664 | -           | 0.236601077 | -           |
| POLN      | 353497   | 2899  | 0.846027601 | 1.844768691 | 0.72881946  | 2.16464117  |
| BCL3      | 602      | 1864  | 1.315790781 | 9.324543675 | 2.493704265 | 30.08197159 |
| EYA1      | 2138     | 4341  | 0.564992863 | 0.410656871 | 0.34070337  | 0.093263701 |
| CXorf65   | 158830   | 882   | 2.780764191 | 2.526447673 | 3.353726371 | 4.819734832 |
| ZNF280B   | 140883   | 5733  | 0.427809876 | 0.466421109 | 0.737082719 | 0.317784714 |
| C10orf140 | 387640   | 6613  | 0.370880692 | 0.303265411 | 0.383398932 | 0.122442984 |
| PIPOX     | 51268    | 2412  | 1.016846607 | 1.108620322 | 0.525583983 | 1.426737425 |
| TTC4      | 7268     | 2395  | 1.024064308 | 0.558244722 | 0.529314642 | 0.42260723  |
| BMI1      | 648      | 3435  | 0.714012814 | 0.518969863 | 0.676603311 | 0.707175067 |
| DNAH6     | 1768     | 12795 | 0.19168691  | 0.156740458 | 0.099078434 | 0.03164187  |
| AIF1L     | 83543    | 3533  | 0.694207194 | 0.504574435 | 1.614686826 | 0.515669337 |
| ZNF662    | 389114   | 5612  | 0.437033859 | 0.436771121 | 0.225892475 | 0.57713147  |
| SLC9A7P1  | 121456   | 3306  | 0.741873568 | 0.202207518 | 0.319547431 | 0.367384506 |
| MUC20     | 200958   | 6462  | 0.379547202 | 0.482769667 | 0.425054456 | 1.190389476 |
| CKM       | 1158     | 1719  | 1.426779533 | 1.944438785 | 4.056077443 | 2.237433622 |
| DAND5     | 199699   | 1732  | 1.416070448 | 1.543875414 | 0.365966677 | 1.285633656 |
| NKX3-2    | 579      | 2241  | 1.094437312 | 0.994344867 | 1.791347821 | 0.993626726 |
| ZSWIM5    | 57643    | 5860  | 0.418538228 | 0.532364776 | 0.43266504  | 0.37998592  |
| ABP1      | 26       | 2438  | 1.006002468 | 9.596977809 | 3.293199726 | 9.216408445 |
| GRK4      | 2868     | 2321  | 1.056714354 | 1.152086263 | 1.27444492  | 0.523297362 |
| HOXA11-A  | 221883   | 1628  | 1.506531951 | 1.916251589 | 2.465854095 | 1.865130801 |
| TMEM236   | 653567   | 5464  | 0.448871526 | 0.489383641 | 0.425353656 | 0.259334195 |
| LOC33875  | 338758   | 2998  | 0.818090066 | 0.594616904 | 0.845702847 | 1.282904735 |
| ANXA9     | 8416     | 1843  | 1.330783514 | 0.362722764 | 1.375701105 | 1.208202655 |
| SEMA4G    | 57715    | 4415  | 0.555522994 | 0.302830376 | 0.478561181 | 0.275101513 |
| EPS8L1    | 54869    | 2607  | 0.940787885 | 0.598323281 | 1.053587226 | 2.717687075 |
| HCN3      | 57657    | 3717  | 0.65984235  | 1.019143299 | 0.341056919 | 0.490142525 |
| HIATL2    | 84278    | 802   | 3.058147153 | 3.334154884 | 2.897920667 | 1.766835462 |
| SLC5A5    | 6528     | 3594  | 0.682424601 | 0.806016945 | 0.587881918 | 0.619565246 |
| ST8SIA1   | 6489     | 9737  | 0.251888058 | 0.160196035 | 0.130194985 | 0.270265505 |
| RNF208    | 727800   | 1079  | 2.27306211  | 0.20651778  | 1.370707442 | 0.375215687 |
| AKIRIN2-A | 55389    | 914   | 2.68340702  | 0.975197745 | 3.236309255 | 5.758370281 |
| LOC10050  | 1.01E+08 | 1011  | 2.425948582 | 6.391837643 | 6.269577488 | 7.00792305  |
| PALM2     | 114299   | 9500  | 0.258172002 | 0.187648577 | 0.222405012 | 0.191774712 |
| RPL21P44  | 402176   | 1797  | 1.364849202 | 1.860039105 | 0.823034685 | 2.590909209 |
| PRH1-PRR4 | 1.01E+08 | 1603  | 1.530027459 | 1.390097846 | 1.318058399 | 0.63140631  |
| NUDT4P1   | 440672   | 3785  | 0.647987851 | 0.176617716 | 0.558216014 | 0.641782392 |
| TPPP      | 11076    | 6039  | 0.406132475 | 2.656723514 | 0.489813986 | 4.055951717 |
| ZNF878    | 729747   | 1762  | 1.391960282 | 1.770520764 | 1.558854652 | 1.033972626 |
| TMED6     | 146456   | 940   | 2.609185124 | 1.659392333 | 2.47248125  | 0.646049563 |
| XKR5      | 389610   | 4908  | 0.499721682 | 0.771832853 | 0.602686768 | 0.371202071 |
| ZEB1-AS1  | 220930   | 2232  | 1.098850366 | 2.096544077 | 1.230601209 | 0.72555148  |
| RAP1GAP2  | 23108    | 6680  | 0.367160781 | 0.667163727 | 0.474441829 | 2.12126054  |
| FAM171B   | 165215   | 3557  | 0.689523198 | 0.313231213 | 0.29699854  | 0.113819996 |
| C1orf93   | 127281   | 2845  | 0.86208577  | 0.234972954 | 1.782367055 | 0.569220001 |
| KIAA1161  | 57462    | 4205  | 0.583266116 | 0.264961575 | 0.552706867 | 0.144420116 |
| CMAHP     | 8418     | 2484  | 0.987372792 | 0.5382432   | 0.510349665 | 2.36329993  |
| DHRS12    | 79758    | 1970  | 1.244991887 | 0.113113038 | 1.394264923 | 0.616534608 |

|           |        |       |             |             |             |             |
|-----------|--------|-------|-------------|-------------|-------------|-------------|
| PSD       | 5662   | 4183  | 0.586333736 | 0.532710219 | 0.707144791 | 0.435539031 |
| C5        | 727    | 5480  | 0.410264206 | 1.585853048 | 0.501222974 | 0.701851897 |
| KIAA1614  | 57710  | 4155  | 0.541094548 | 0.804450125 | 0.813611596 | 0.584632095 |
| KIF7      | 374654 | 4575  | 0.491420295 | 0.292239587 | 0.508007076 | 0.176986984 |
| TFR2      | 7036   | 2891  | 0.777671342 | 1.926951615 | 1.315505259 | 3.150916234 |
| NEK5      | 341676 | 2949  | 0.762376347 | 0.906745411 | 0.286584959 | 0.617789002 |
| TRPM6     | 140803 | 8431  | 0.266664435 | 0.422882571 | 0.325786016 | 0.384161049 |
| RNF207    | 388591 | 3987  | 0.56389462  | 0.335338878 | 0.317960514 | 0.304633353 |
| CHKB      | 1120   | 1648  | 1.364228063 | 1.352140077 | 0.384620318 | 0.61416524  |
| PRORS1P   | 344405 | 2154  | 1.043754804 | 1.758660929 | 2.157968779 | 0.751824932 |
| SCNN1D    | 6339   | 3426  | 0.656231129 | 0.455291533 | 0.431696827 | 0.177258199 |
| DZIP1L    | 199221 | 3498  | 0.642723799 | 0.955543245 | 0.241606359 | 0.810178411 |
| CLEC7A    | 64581  | 2622  | 0.85745532  | 1.529743831 | 2.25628273  | 27.40741661 |
| LOC100289 | 1E+08  | 1876  | 1.198426358 | 1.069026739 | 0.337875418 | 0.863236089 |
| ZNF673    | 55634  | 2502  | 0.898580275 | 2.40466926  | 1.01335617  | 2.669925051 |
| SLC22A5   | 6584   | 3295  | 0.682321047 | 1.352550438 | 0.705351252 | 0.982962612 |
| GSTM3     | 2947   | 4144  | 0.542530851 | 0.53772366  | 0.560842755 | 0.732729958 |
| TMEM187   | 8269   | 1682  | 1.336651515 | 2.119692602 | 1.25615197  | 1.323851066 |
| ZNF230    | 7773   | 4132  | 0.544106449 | 0.485356767 | 0.35793643  | 0.538895811 |
| STX1B     | 112755 | 4544  | 0.494772854 | 0.343272182 | 0.27898516  | 0.712777686 |
| PARD6A    | 50855  | 1273  | 1.766102002 | 1.575407826 | 1.991686674 | 1.590171744 |
| TRIM16L   | 147166 | 1982  | 1.134332921 | 0.562140981 | 0.639610781 | 0.612801805 |
| LOC344595 | 344595 | 3278  | 0.685859624 | 0.407869466 | 0.257821551 | 0.370522629 |
| RHEBL1    | 121268 | 1192  | 1.886113967 | 0.560820515 | 1.063513899 | 1.188760101 |
| TGM1      | 7051   | 2777  | 0.809595912 | 0.962906812 | 0.684754358 | 1.82237003  |
| GDAP1     | 54332  | 3899  | 0.576621659 | 1.428781    | 1.083789491 | 2.388234854 |
| MSRB3     | 253827 | 4598  | 0.488962125 | 0.339240712 | 0.505465936 | 0.748432073 |
| CGN       | 57530  | 5132  | 0.438084148 | 0.086840485 | 0.741061127 | 0.157777758 |
| FLJ39639  | 283876 | 2443  | 0.920281559 | 0.638489068 | 1.037829364 | 0.497164625 |
| STAG3     | 10734  | 4285  | 0.524678611 | 0.520029603 | 0.641003943 | 0.708619124 |
| AGPAT9    | 84803  | 2534  | 0.887232774 | 2.638113868 | 2.834917871 | 4.154025601 |
| RAB42     | 115273 | 1149  | 1.956699607 | 1.939361921 | 3.309944042 | 1.585604671 |
| SERINC4   | 619189 | 1490  | 1.508891173 | 0.299104275 | 0.85081112  | 0.135858297 |
| SPATA24   | 202051 | 719   | 3.126909386 | 1.859521709 | 1.469295976 | 0.844626688 |
| PDF       | 64146  | 1180  | 1.905294787 | 1.888412583 | 2.86487812  | 0.514649652 |
| PIWIL2    | 55124  | 3997  | 0.562483825 | 0.222999935 | 0.26430418  | 0.202580799 |
| C9orf47   | 286223 | 4911  | 0.457798381 | 0.045374198 | 0.688364118 | 0.041219479 |
| AKAP7     | 9465   | 2943  | 0.763930631 | 2.044336557 | 0.646130769 | 3.783074231 |
| AIPL1     | 23746  | 2981  | 0.754192502 | 1.49501969  | 0.283508569 | 1.426033587 |
| TMEM91    | 641649 | 1091  | 2.060722134 | 1.633970191 | 0.774646238 | 0.556632987 |
| ELMO3     | 79767  | 2548  | 0.882357868 | 1.399263326 | 0.829218059 | 1.271138857 |
| ALDH1L2   | 160428 | 7555  | 0.297584096 | 0.08848419  | 0.167797296 | 0.107176102 |
| BCL11B    | 64919  | 7816  | 0.287646859 | 0.142549056 | 0.297355729 | 0.025899292 |
| PBLD      | 64081  | 2587  | 0.869055991 | 1.464304461 | 1.061732469 | 1.017230467 |
| ZNF469    | 84627  | 13203 | 0.170283106 | 0.573832559 | 0.176030628 | 1.65585982  |
| LHX4      | 89884  | 1909  | 1.177709716 | 0.116727441 | 1.881530091 | 0.530196079 |
| PDE8B     | 8622   | 4405  | 0.510385437 | 0.607035691 | 0.383718068 | 0.183817356 |
| LOC100130 | 1E+08  | 1928  | 1.166103656 | 1.040194068 | 1.20546285  | 1.364924906 |
| LOC100129 | 1E+08  | 1422  | 1.581046307 | 1.253629731 | 1.485828139 | 0.142355037 |
| CD99P1    | 401577 | 2915  | 0.771268559 | 0.535104217 | 0.942264802 | 1.180545684 |
| THPO      | 7066   | 1805  | 1.245566675 | 2.345607208 | 1.404663233 | 1.682234318 |
| MTX3      | 345778 | 7882  | 0.285238245 | 0.197897589 | 0.160835901 | 0.205459389 |
| GPR97     | 222487 | 2676  | 0.84015241  | 78.94072688 | 0.710598973 | 223.5341144 |
| DDX39B    | 7919   | 2174  | 1.034152644 | 1.43498509  | 1.263432336 | -           |
| ADC       | 113451 | 2210  | 1.017306719 | 0.100829269 | 1.338455502 | 0.549580623 |
| ZSCAN23   | 222696 | 3178  | 0.70744111  | 0.981641783 | 1.130220561 | 0.509575489 |
| ANTXRL    | 195977 | 2129  | 1.056011202 | 0.313996268 | 1.587861053 | 0.855734977 |
| KREMEN2   | 79412  | 2071  | 1.085585634 | 1.18356327  | 1.734351011 | 0.390978007 |
| CALHM2    | 51063  | 1966  | 1.143564521 | 0.680059058 | 1.612040397 | 0.102964834 |
| PDZK1     | 5174   | 2301  | 0.97707425  | 0.774733367 | 0.642761117 | 0.439871497 |
| KLF15     | 28999  | 2539  | 0.885485565 | 0.087763956 | 0.582510173 | -           |
| DRAM1     | 55332  | 3553  | 0.632774514 | 8.592197526 | 1.962397164 | 16.80735001 |

|           |        |       |             |             |             |             |
|-----------|--------|-------|-------------|-------------|-------------|-------------|
| SPSB1     | 80176  | 3130  | 0.718290047 | 1.708621225 | 0.675031186 | 4.85053186  |
| FLRT1     | 23769  | 3252  | 0.691343127 | 0.205565207 | 0.324853569 | 0.062247498 |
| RGNEF     | 64283  | 6369  | 0.352998563 | 0.139948303 | 0.06634786  | -           |
| IDI2-AS1  | 55853  | 1324  | 1.698072393 | 0.84151316  | 1.117064448 | -           |
| ZNF483    | 158399 | 2425  | 0.927112515 | -           | -           | -           |
| RPS6KA6   | 27330  | 8223  | 0.273409686 | 0.189690964 | 0.179860553 | 0.073852194 |
| IL9R      | 3581   | 2175  | 1.033677172 | 0.922066282 | 3.885696761 | 1.209919641 |
| LOXL2     | 4017   | 3810  | 0.590091299 | 0.350917614 | 0.388187226 | 0.637571222 |
| HOXC8     | 3224   | 2290  | 0.981767619 | 0.973068492 | 1.476225407 | 0.79557195  |
| RRN3P2    | 653390 | 2412  | 0.93210939  | 0.831465242 | 1.401557289 | 1.258885964 |
| IL32      | 9235   | 1157  | 1.943170137 | 0.192595233 | 13.87868787 | 3.149282224 |
| ZNF167    | 55888  | 3483  | 0.645491774 | 1.599430697 | 1.152572629 | 0.69742933  |
| SCARF2    | 91179  | 3523  | 0.638162886 | 1.897524991 | 0.779648566 | 1.436480719 |
| CTSK      | 1513   | 1825  | 1.231916629 | 2.319901923 | 2.083904496 | 1.996558648 |
| MLANA     | 2315   | 1524  | 1.475228247 | 3.801607482 | 3.743233961 | 3.055028772 |
| ADAMTS13  | 11093  | 4941  | 0.455018791 | 0.856875331 | 0.5559      | 0.614538139 |
| ABHD16B   | 140701 | 1776  | 1.26590532  | 2.132970518 | 0.951733159 | 4.217267978 |
| C7orf53   | 286006 | 1686  | 1.333480337 | 1.057331837 | 0.877220243 | 0.240129138 |
| ADPRHL1   | 113622 | 1917  | 1.172794913 | 1.976085363 | 3.967788946 | 0.527983471 |
| CD300C    | 10871  | 1548  | 1.452356491 | 8.205079477 | 1.228399775 | 17.26137591 |
| IL18RAP   | 8807   | 2668  | 0.842671607 | 6.514598729 | 2.217381304 | 12.13966195 |
| KIAA0895  | 23366  | 4471  | 0.50285123  | -           | 0.567080549 | 0.09055194  |
| LOC100130 | 1E+08  | 1788  | 1.257409311 | 0.623133906 | 1.299850322 | 0.905721982 |
| TCP11L2   | 255394 | 2243  | 1.002339656 | 0.993458247 | 2.260737527 | 3.42946803  |
| TNFRSF25  | 8718   | 1665  | 1.350299008 | 0.401500333 | 2.284159582 | 0.36473669  |
| CATSPER1  | 117144 | 2634  | 0.853548917 | 1.776570379 | 1.604288241 | 4.841692622 |
| SFTP8B    | 6439   | 3681  | 0.610770945 | 0.42375137  | 0.631386138 | 0.879886392 |
| NCALD     | 83988  | 3826  | 0.587623588 | 0.174725053 | 0.331340452 | -           |
| AP3B2     | 8120   | 3746  | 0.600172944 | 0.118971001 | 0.394819362 | 0.432309371 |
| MYO15B    | 80022  | 9424  | 0.238566198 | 0.354678509 | 0.201778741 | 0.579963848 |
| GNRH1     | 2796   | 2166  | 1.037972229 | 0.617265055 | 1.170552695 | 0.747659697 |
| AP1S3     | 130340 | 4005  | 0.561360262 | 1.224049704 | 0.685818202 | 1.870129321 |
| LOC143188 | 143188 | 3235  | 0.694976151 | 0.344409095 | 0.783745637 | 0.876044538 |
| LOC145663 | 145663 | 1424  | 1.578825736 | 1.251869015 | 1.483741302 | 1.848016305 |
| CDC42EP2  | 10435  | 2001  | 1.123562143 | 0.779524634 | 0.422358344 | 2.933751637 |
| KCNE4     | 23704  | 2976  | 0.755459627 | 0.449259445 | 0.496973565 | 0.54416361  |
| GCSH      | 2653   | 1538  | 1.461799641 | 0.724423552 | 1.23638677  | -           |
| LCAT      | 3931   | 1354  | 1.660448928 | 2.304030714 | 1.248359004 | 2.691077942 |
| FZD4      | 8322   | 7394  | 0.304063815 | 0.421917445 | 0.200026147 | 3.257916512 |
| TICAM1    | 148022 | 2720  | 0.826561709 | 1.146932936 | 0.776782211 | 6.549169096 |
| FAM41C    | 284593 | 1779  | 1.263770573 | 2.505145416 | 2.494086559 | 2.048184111 |
| MORC2-AS1 | 150291 | 2134  | 1.053536949 | 0.939781707 | 1.485131875 | 0.284576658 |
| ICAM2     | 3384   | 1352  | 1.662905213 | 0.824085373 | 0.625102844 | 2.994509807 |
| CACNB2    | 783    | 4468  | 0.503188865 | 0.448857243 | 0.898480409 | 0.226531852 |
| FLJ27352  | 145788 | 782   | 2.874997249 | 0.569904565 | 2.161480935 | 1.81202307  |
| SLC7A14   | 57709  | 10133 | 0.221873862 | 0.197917119 | 0.104255779 | 0.199771897 |
| COL5A1    | 1289   | 8439  | 0.266411642 | 0.105620422 | 0.350513883 | 0.095949218 |
| CX3CR1    | 1524   | 3264  | 0.688801424 | 9.899123556 | 0.453122956 | 4.775435799 |
| SNHG11    | 128439 | 1101  | 2.042005312 | 4.452605871 | 7.292298757 | 2.941745511 |
| SLC46A3   | 283537 | 3372  | 0.666740169 | 0.396499439 | 0.438610121 | 0.900484266 |
| PPP1R13L  | 10848  | 3122  | 0.720130637 | 0.428249875 | 0.541408741 | 0.259357928 |
| CACNB4    | 785    | 8067  | 0.278696895 | 0.359095686 | 0.288103679 | 0.150560701 |
| SPIRE1    | 56907  | 5444  | 0.412977195 | 0.368386143 | 0.11643172  | 0.037183847 |
| MAP3K9    | 4293   | 5602  | 0.401329498 | 0.676214859 | 0.67888713  | 0.831107434 |
| NAALAD2   | 10003  | 3196  | 0.703456774 | 0.766946036 | 1.189964238 | 0.190014577 |
| KLB       | 152831 | 6079  | 0.369838435 | 0.366561416 | 0.278051997 | 0.332996978 |
| NKD1      | 85407  | 2604  | 0.86338243  | 1.112451959 | 1.135939577 | 5.597111418 |
| INMT      | 11185  | 2639  | 0.851931735 | 1.097697954 | 1.200936499 | 0.920479862 |
| KLHL3     | 26249  | 6806  | 0.330333213 | 0.818515592 | 0.434614555 | 0.832795792 |
| RAB40B    | 10966  | 1776  | 1.26590532  | 0.501875416 | 1.903466319 | 0.341940647 |
| PIK3IP1   | 113791 | 2478  | 0.907283232 | 0.539546452 | 0.937906527 | 2.042260522 |
| TOB2P1    | 222699 | 3592  | 0.625904189 | 0.310179127 | 0.352925548 | 0.112710948 |

|           |          |       |             |             |             |             |
|-----------|----------|-------|-------------|-------------|-------------|-------------|
| ZNF425    | 155054   | 3244  | 0.693048042 | 1.373814333 | 1.432880626 | 1.560025146 |
| APOBEC2   | 10930    | 1643  | 1.368379701 | 0.678127464 | 0.900178533 | 0.616034276 |
| BMP7      | 655      | 4049  | 0.555260027 | 0.660408056 | 0.834911381 | 0.649932136 |
| HESX1     | 8820     | 1182  | 1.902070938 | 2.073739029 | 1.430015305 | 64.56487423 |
| POTEM     | 641455   | 6666  | 0.306609913 | 0.233997719 | 0.158479419 | 0.060734732 |
| FLJ35390  | 255031   | 2159  | 0.946670533 | 1.651377006 | 0.880760932 | 1.312646633 |
| A2LD1     | 87769    | 2678  | 0.763204511 | 2.579467224 | 1.341240083 | 2.267687038 |
| TNFAIP6   | 7130     | 1439  | 1.420334733 | 2.322786846 | 0.293654985 | 30.66677701 |
| LOC100130 | 1E+08    | 3803  | 0.537434047 | 1.171878437 | 0.555573919 | 0.904888422 |
| GIMAP2    | 26157    | 1523  | 1.341997164 | 4.681973678 | 2.080939869 | 24.05753394 |
| ALG1L2    | 644974   | 969   | 2.10924838  | 0.919845964 | 1.090220647 | 2.297954069 |
| FCGBP     | 8857     | 16407 | 0.124572541 | 0.027163124 | 0.283309852 | 0.049351829 |
| LOC100500 | 1.01E+08 | 1181  | 1.730619543 | 0.754725435 | 1.252322887 | 1.371237006 |
| C14orf105 | 55195    | 2512  | 0.813639204 | 0.532243674 | 0.756991581 | 1.128186338 |
| CATSPER2  | 440278   | 1649  | 1.239455234 | 0.945924071 | 0.768774147 | 0.736551351 |
| TSSK3     | 81629    | 1330  | 1.536738106 | 3.35086744  | 1.270885783 | 3.044043052 |
| ALG14     | 199857   | 1057  | 1.933643974 | 2.529793961 | 2.398691709 | 1.915126423 |
| C8orf76   | 84933    | 1351  | 1.512850985 | 1.81432978  | 2.815044933 | 1.648199476 |
| MDGA1     | 266727   | 8907  | 0.2294669   | 0.375265552 | 0.142327222 | 0.295450232 |
| S100A1    | 6271     | 607   | 3.367152686 | 5.506573758 | 6.961606635 | 4.668869986 |
| LOC727890 | 727896   | 3412  | 0.599021595 | 0.391851146 | 0.247696086 | 0.296642531 |
| SRGAP1    | 57522    | 8475  | 0.24116362  | 0.867667091 | 0.149582132 | 1.958603748 |
| C3orf18   | 51161    | 2712  | 0.753636313 | 0.410827221 | 0.311629442 | 0.746419111 |
| TRIM58    | 25893    | 5158  | 0.39625081  | 0.518416483 | 0.573475506 | 0.902649059 |
| FICD      | 11153    | 1651  | 1.237953774 | 1.889556382 | 1.91960716  | 3.31046596  |
| SYNE1     | 23345    | 27748 | 0.073657982 | 0.080305854 | -           | -           |
| GNRHR     | 2798     | 5843  | 0.349796625 | 0.038136691 | 0.216961932 | 0.242512757 |
| NOL3      | 8996     | 1885  | 1.084276754 | 0.591068129 | 1.232961472 | 0.536946586 |
| PNPLA7    | 375775   | 4806  | 0.425272926 | 0.370924153 | 0.571515168 | 0.336960238 |
| KIAA1217  | 56243    | 7773  | 0.262943739 | 0.229340213 | 0.217455048 | 6.354386024 |
| GTF2H2    | 2966     | 1951  | 1.047596966 | 2.055862801 | 1.407843105 | 1.141321114 |
| ZNF80     | 7634     | 2957  | 0.691194346 | 0.678219196 | 1.143238479 | 1.506065264 |
| CMTM1     | 113540   | 1081  | 1.890713858 | 4.534985258 | 2.345436759 | 8.801254911 |
| RTEL1     | 51750    | 5042  | 0.405367251 | 0.530343557 | 0.460954458 | 0.120445575 |
| OR7D2     | 162998   | 3224  | 0.633952134 | 0.345584188 | 0.393209854 | 0.56509298  |
| LRRC39    | 127495   | 1423  | 1.436304765 | 1.722529538 | 1.633262386 | 2.418334976 |
| RAB36     | 9609     | 3822  | 0.534762344 | 0.349815832 | 0.386968427 | 0.582605309 |
| DHRS3     | 9249     | 1825  | 1.119924208 | 69.2307574  | 0.694634832 | 135.1004685 |
| OTUB2     | 78990    | 3873  | 0.527720547 | 0.460279235 | 0.381872794 | 0.627200195 |
| ITGA10    | 8515     | 5189  | 0.393883538 | 0.171773124 | 0.244306912 | 0.078022302 |
| SIRPD     | 128646   | 868   | 2.354679355 | 5.391113341 | 1.703909366 | 4.431046539 |
| LOC100500 | 1.01E+08 | 5619  | 0.363741178 | 0.356913003 | 0.526425816 | 0.828592961 |
| MAPK10    | 5602     | 4213  | 0.485132134 | 0.105783378 | 0.351054671 | 0.192194506 |
| ERMN      | 57471    | 3790  | 0.539277488 | 0.587949036 | 0.334487749 | 2.670565474 |
| ZNF837    | 116412   | 2050  | 0.997005698 | 0.652193224 | 0.824525898 | 0.394983147 |
| ACRC      | 93953    | 3178  | 0.643128282 | 0.841407243 | 0.997253436 | 1.210241786 |
| SNPH      | 9751     | 5026  | 0.406657716 | 0.08867198  | 0.252230117 | 0.040276336 |
| FLJ12825  | 440101   | 3942  | 0.51848343  | 0.565278246 | 0.267991833 | 0.410814537 |
| DTX2P1-U  | 441263   | 1782  | 1.146948193 | 2.751020799 | 2.252755593 | 2.612718209 |
| LILRA6    | 79168    | 3930  | 0.520066585 | 0.737105573 | 0.376334181 | 3.090516992 |
| CD19      | 930      | 1968  | 1.038547602 | 3.623295687 | 1.180961573 | 2.777225254 |
| LOC100120 | 1E+08    | 2068  | 0.988327698 | 0.646516493 | 0.817349174 | 0.097886297 |
| LOC100130 | 1E+08    | 1287  | 1.588082114 | 1.731411692 | 1.477515814 | 1.887448606 |
| FABP6     | 2172     | 752   | 2.717901171 | 7.408001487 | 4.214456676 | 3.499435131 |
| CLCF1     | 23529    | 1860  | 1.098850366 | 0.958420149 | 1.590315408 | 0.652996332 |
| C1orf213  | 148898   | 2879  | 0.709920695 | 0.077399335 | 0.733882464 | 0.140624427 |
| PCSK6     | 5046     | 4559  | 0.448313595 | 0.244387678 | 0.185378163 | 0.222010159 |
| MSMP      | 692094   | 693   | 2.949295354 | 1.286191543 | 2.134189509 | 2.044735989 |
| SEC1      | 653677   | 2649  | 0.771559713 | 0.504717293 | 0.319040787 | 0.22925126  |
| TNFRSF14  | 8764     | 1730  | 1.181422937 | 11.97886687 | 2.076208638 | 25.39136605 |
| LTA       | 4049     | 1459  | 1.400864757 | 0.305459472 | 1.158518225 | 0.832469621 |
| LOC653160 | 653160   | 1917  | 1.066177194 | 1.627364416 | 0.991947236 | 1.795143803 |



|           |        |       |             |             |             |             |
|-----------|--------|-------|-------------|-------------|-------------|-------------|
| ZNRF2P1   | 441208 | 2034  | 1.004848417 | 1.095539256 | 1.350394247 | 0.696657837 |
| STRC      | 161497 | 5515  | 0.370600486 | 0.121214516 | 0.229865561 | 0.293641143 |
| AURKAPS1  | 6791   | 1537  | 1.329773377 | 0.869873851 | 0.824794124 | 0.526815518 |
| HEXIM2    | 124790 | 1330  | 1.536738106 | 1.172803604 | 1.588607228 | 1.369819373 |
| NAV1      | 89796  | 13029 | 0.156870188 | 0.136822586 | 0.145948488 | 0.450566968 |
| SLC14A2   | 8170   | 4167  | 0.490487564 | 0.748657928 | 0.55774715  | 1.505950264 |
| GBP4      | 115361 | 6160  | 0.331795727 | 0.687308606 | 0.308695268 | 6.900983964 |
| WDR78     | 79819  | 3871  | 0.527993201 | 0.518081675 | 0.436651535 | 0.209174749 |
| ADAMTS15  | 170689 | 5676  | 0.360088386 | 0.078517507 | 0.93060589  | 0.249647999 |
| AKAP2     | 11217  | 7016  | 0.291314379 | 0.06352129  | 0.210802926 | 0.028852461 |
| C8orf73   | 642475 | 3251  | 0.628687075 | 1.096685006 | 1.429795371 | 0.809466385 |
| RNU105A   | 26768  | 158   | 12.93583342 | 2.820666895 | 1.337245325 | -           |
| CRABP2    | 1382   | 1088  | 1.878549339 | 1.638475623 | 0.970977764 | 0.558167821 |
| CEP112    | 201134 | 3525  | 0.579818916 | -           | 0.239755758 | 0.057426628 |
| COLQ      | 8292   | 3136  | 0.651741607 | 1.279014134 | 0.808487607 | 0.580950181 |
| C15orf62  | 643338 | 2503  | 0.816564794 | 1.246367394 | 0.675300875 | 0.646995966 |
| NPL       | 80896  | 3027  | 0.675210334 | 0.515305184 | 2.303401759 | 4.346837163 |
| SCNM1     | 79005  | 2085  | 0.980269391 | 1.282490272 | 1.621369871 | 1.456322755 |
| DHRS4     | 10901  | 1289  | 1.585618061 | 1.03723515  | 1.803050718 | 1.256346706 |
| MTAP      | 4507   | 4937  | 0.413988592 | 0.225676205 | 0.256777105 | 0.410024029 |
| GEMIN8P4  | 492303 | 1715  | 1.191756082 | 0.259863189 | 1.478377339 | 0.944274579 |
| KIAA0226L | 80183  | 3993  | 0.511861177 | 0.558058314 | 0.740793053 | 3.396627553 |
| EFHA2     | 286097 | 3987  | 0.512631472 | 0.223559252 | 0.317960514 | 0.609266706 |
| SLC26A9   | 115019 | 4815  | 0.424478023 | -           | 0.789849575 | 0.042041301 |
| PCSK4     | 54760  | 2674  | 0.764346178 | 0.249999272 | 0.711130461 | 0.151405283 |
| HRH2      | 3274   | 3095  | 0.660375341 | 1.367955092 | 0.7509313   | 1.046482006 |
| AOC2      | 314    | 2681  | 0.762350496 | 0.748039598 | 0.709273723 | 0.151009969 |
| AGPAT4-IT | 79992  | 1869  | 1.093558952 | 0.238451241 | 0.452187825 | 0.866469183 |
| BHMT2     | 23743  | 2651  | 0.770977624 | 0.588392604 | 1.27520037  | 1.145391529 |
| ID2       | 3398   | 1402  | 1.457818602 | 19.0726977  | 3.466155144 | 89.08602599 |
| FAM92A1   | 137392 | 1135  | 1.80075919  | 0.981641783 | 0.744615899 | 0.356702842 |
| KCTD11    | 147040 | 3081  | 0.663376073 | 0.723247922 | 0.960073567 | 1.773962772 |
| PAPL      | 390928 | 2962  | 0.690027576 | 0.75230481  | 0.998645057 | 0.478393667 |
| ZFYVE28   | 57732  | 4161  | 0.491194828 | 0.053552676 | 0.1523322   | -           |
| ZNF185    | 7739   | 4440  | 0.460329207 | 0.451687874 | 0.428279922 | 0.136776259 |
| ADORA3    | 140    | 2261  | 0.903963592 | 1.576878795 | 4.111689297 | 11.37039611 |
| FAM13A-A  | 285512 | 3210  | 0.636717034 | 1.180110791 | 0.592387181 | 1.072053168 |
| WWC3      | 55841  | 6463  | 0.316240396 | 0.137912848 | 0.392297251 | 0.187927151 |
| LOC100288 | 1E+08  | 2183  | 0.936262795 | 1.020763558 | 0.483932115 | 1.298215337 |
| ZNF876P   | 642280 | 2621  | 0.779802244 | 1.105236513 | 1.047959518 | 0.84956791  |
| LAMC2     | 3918   | 5623  | 0.363482426 | 0.317030318 | 0.225450572 | -           |
| UBAP1L    | 390595 | 1399  | 1.460944732 | 0.637119899 | 0.453076686 | 0.434086196 |
| LOC257358 | 257358 | 2204  | 0.92734196  | 0.808830072 | 0.671049605 | 0.27553838  |
| PALLD     | 23022  | 5870  | 0.34818768  | 17.15849634 | 0.287951975 | 27.62274604 |
| SLC25A34  | 284723 | 3172  | 0.644344792 | 1.12399841  | 1.132358431 | 2.871783995 |
| C19orf57  | 79173  | 2420  | 0.844570942 | 0.828716596 | 1.135000784 | 0.250944871 |
| HYAL1     | 3373   | 2518  | 0.811700429 | 1.150446744 | 0.755187789 | 0.643141741 |
| CNTD1     | 124817 | 3318  | 0.615992068 | 0.738746092 | 0.382070093 | 0.73211162  |
| SGIP1     | 84251  | 4694  | 0.435420043 | 0.094943624 | 0.090023332 | 0.560625313 |
| LOC284411 | 284412 | 2450  | 0.834229257 | 1.000473278 | 0.776148103 | 0.247872077 |
| LOC100288 | 1E+08  | 2597  | 0.787008733 | 0.943842716 | 0.813572435 | 1.091260717 |
| LOC729178 | 729178 | 3082  | 0.663160831 | 1.229122531 | 0.342772163 | 1.707706177 |
| GPC2      | 221914 | 2666  | 0.76663979  | 0.585082068 | 0.634012787 | 0.455578836 |
| DSG3      | 1830   | 5561  | 0.367534918 | 0.360635526 | 0.493922298 | 0.436818262 |
| NPR2      | 4882   | 3447  | 0.592939275 | 0.517163179 | 0.36777156  | 0.52853489  |
| NR6A1     | 2649   | 1918  | 1.065621314 | 2.672133342 | 2.643813489 | 2.005291135 |
| IL17RB    | 55540  | 2072  | 0.98641973  | 1.290536784 | 1.325628329 | 0.976973277 |
| C8orf84   | 157869 | 3804  | 0.537292766 | 0.41004963  | 0.666513443 | 0.372503165 |
| LOC147670 | 147670 | 2542  | 0.804036853 | 0.613622657 | 0.8311753   | 0.477802194 |
| KAZN      | 23254  | 6047  | 0.337995978 | 0.515901701 | 0.314463842 | 0.066951832 |
| MYO1E     | 4643   | 4729  | 0.432197437 | 0.329843264 | 0.357428228 | 0.128417549 |
| ANUBL1    | 93550  | 3708  | 0.551203258 | 0.300475573 | 0.512827091 | 0.491332192 |

|           |          |       |             |             |             |             |
|-----------|----------|-------|-------------|-------------|-------------|-------------|
| PDE5A     | 8654     | 7005  | 0.291771832 | 0.318105189 | 0.241295944 | 0.375670981 |
| LOC15062  | 150622   | 11868 | 0.172216185 | 0.093879628 | 0.035605791 | 0.187623651 |
| GPR89A    | 653519   | 2030  | 1.006828414 | 0.658618773 | 1.248973959 | 0.498593259 |
| PRAF2     | 11230    | 1263  | 1.618259446 | 2.117175152 | 1.840168151 | 3.045248136 |
| PLA2G4E   | 123745   | 4798  | 0.425982009 | 0.464428272 | 0.484396076 | 0.295331813 |
| GSTTP2    | 653399   | 2070  | 0.987372792 | 0.75354048  | 0.816559464 | 1.271292376 |
| LRRC18    | 474354   | 1642  | 1.244739148 | 0.542832362 | 0.128675251 | 0.12328189  |
| IZUMO4    | 113177   | 1020  | 2.003785961 | 0.436926833 | 1.242851537 | 0.992298348 |
| CHST9-AS1 | 147429   | 2392  | 0.854457224 | 0.372629908 | 0.176659499 | 0.338509804 |
| GP6       | 51206    | 2268  | 0.90117358  | 1.768513371 | 0.465795329 | 2.320613067 |
| LY75      | 4065     | 6936  | 0.294674406 | 0.481904595 | 0.36554457  | 0.554519665 |
| CMYA5     | 202333   | 12911 | 0.158303902 | 0.345182689 | 0.163647093 | 0.611472826 |
| FITM2     | 128486   | 958   | 2.133467307 | 2.326019674 | 1.543834373 | 0.42260723  |
| TMCC2     | 9911     | 4021  | 0.508296862 | 0.055417231 | 1.050906547 | 0.302057493 |
| PRELID2   | 153768   | 2339  | 0.873818589 | 0.190536712 | 0.451656181 | 0.432725231 |
| TRIM3     | 10612    | 3059  | 0.668147002 | -           | 0.690698795 | 0.132349698 |
| GOLGA8E   | 390535   | 5269  | 0.387903147 | 0.676660269 | 0.441095535 | 0.461026069 |
| CCDC121   | 79635    | 2762  | 0.739993367 | 2.178306476 | 0.458982103 | 0.659616136 |
| MOG       | 4340     | 2170  | 0.941871742 | 1.026878732 | 0.584197497 | 0.466425952 |
| LAMB2P1   | 22973    | 1543  | 1.324602515 | 0.577660881 | 0.547724592 | 0.918342217 |
| PART1     | 25859    | 5914  | 0.345597173 | 0.452146131 | 0.535893037 | 0.889947656 |
| ABCB6     | 10058    | 3021  | 0.676551367 | 0.295044932 | 0.69938683  | 0.603065133 |
| MTHFS     | 10588    | 2375  | 0.860573339 | 1.032067171 | 0.533772029 | 1.448964493 |
| F2RL3     | 9002     | 2731  | 0.748393146 | 0.815938062 | 1.77940297  | 0.889471386 |
| LOC10013  | 1E+08    | 2386  | 0.770945311 | 1.30748432  | 0.531311219 | 0.848402611 |
| NOSTRIN   | 115677   | 2819  | 0.652527674 | 0.395233566 | 0.149900505 | 0.215426246 |
| KANK3     | 256949   | 2801  | 0.656720997 | 1.591093786 | 0.829750937 | 0.578161694 |
| IL12RB2   | 3595     | 4040  | 0.455315721 | 0.220626421 | 0.366087458 | 0.450955388 |
| LOC10050  | 1.01E+08 | 1743  | 1.055350265 | 2.684731141 | 1.33340928  | 1.85821102  |
| CCNA1     | 8900     | 1965  | 0.936119854 | -           | 0.215048103 | 1.33922403  |
| GPR19     | 2842     | 1743  | 1.055350265 | 0.6392217   | 0.484876102 | 0.348414566 |
| LOC10013  | 1E+08    | 3377  | 0.544706992 | 0.527883174 | 0.50052653  | 0.179830201 |
| TCEANC    | 170082   | 1955  | 0.94090819  | 1.253790042 | 0.432296187 | 0.621265053 |
| LOC10013  | 1E+08    | 2228  | 0.825617375 | 1.40020538  | 1.137978966 | 0.726854086 |
| ZNF665    | 79788    | 3291  | 0.558941207 | 1.15106522  | 0.963011674 | 0.615098338 |
| LOC10013  | 1E+08    | 1678  | 1.096230937 | 0.398389782 | 0.881402461 | 0.723821918 |
| ZNF570    | 148268   | 2247  | 0.818636187 | 0.198337948 | 0.094029711 | -           |
| ADAMTS14  | 140766   | 5269  | 0.349112832 | 2.918097409 | 0.360896347 | 15.98223704 |
| ITGB4     | 3691     | 5925  | 0.310460002 | 0.601742271 | 0.249619127 | 2.25490379  |
| PELI2     | 57161    | 5755  | 0.319630845 | 0.425918251 | 0.110139754 | 0.738663097 |
| MYO1A     | 4640     | 3624  | 0.507581543 | 0.061488048 | 0.291507673 | 0.055857854 |
| SLC16A2   | 6567     | 4396  | 0.418443019 | -           | 0.480629575 | 0.046048422 |
| HCP5      | 10866    | 2547  | 0.722212608 | 0.262464882 | 0.912497988 | 1.033205818 |
| CNNM1     | 26507    | 5988  | 0.307193639 | 0.26049245  | 0.141138785 | 0.169028777 |
| IQCH      | 64799    | 4254  | 0.432410793 | 0.419055354 | 0.397338526 | 0.237927672 |
| GUCA1B    | 2979     | 2287  | 0.804318108 | 0.584606956 | 0.739080932 | 0.354051356 |
| CKB       | 1152     | 1431  | 1.285447598 | 0.934308951 | 1.624131639 | 3.960872231 |
| PATL2     | 197135   | 1967  | 0.935168029 | 2.492282188 | 0.966732513 | 4.322324476 |
| RPLP0P2   | 113157   | 3525  | 0.521837025 | 0.568934514 | 0.839145152 | 0.689119533 |
| SYCE2     | 256126   | 946   | 1.944477286 | 0.942210083 | 1.340072482 | 1.497887992 |
| TLR3      | 7098     | 3057  | 0.601725716 | 2.624133677 | 0.345575338 | 18.80595259 |
| CDX2      | 1045     | 2090  | 0.880131824 | 0.426474038 | 0.404372749 | 0.290567746 |
| PDK2      | 5164     | 2712  | 0.678272682 | 0.903819886 | 0.623258883 | 0.970344845 |
| GPR55     | 9290     | 3828  | 0.480531743 | 0.349267531 | 0.44155645  | 0.740335444 |
| GHRLOS2   | 84657    | 1345  | 1.367639786 | 2.650797737 | 1.413801377 | 1.505047308 |
| PCDHB2    | 56133    | 2733  | 0.673060927 | 1.141477346 | 0.92770477  | 0.740683728 |
| FILIP1L   | 11259    | 4211  | 0.436826291 | 1.481670666 | 2.10732842  | 7.354931378 |
| ADAMTS7   | 11173    | 5537  | 0.332215191 | 0.040244299 | 0.953967678 | 0.036559303 |
| PYHIN1    | 149628   | 2083  | 0.88308954  | 0.21395361  | 0.507164574 | 0.971814032 |
| FAM180B   | 399888   | 1437  | 1.280080384 | 0.310135956 | 0.88219107  | 0.140869077 |
| ACOT11    | 26027    | 3181  | 0.578269573 | 3.502557132 | 0.398525171 | 1.909105907 |
| FAM124A   | 220108   | 4916  | 0.374181349 | 0.226640241 | -           | 0.370598    |

|          |        |       |             |             |             |             |
|----------|--------|-------|-------------|-------------|-------------|-------------|
| FBXO17   | 115290 | 2215  | 0.830462985 | 0.804813308 | 0.572328925 | 0.639730041 |
| TENC1    | 23371  | 4952  | 0.371461129 | 0.539982273 | 0.213332756 | 0.449660237 |
| SCN11A   | 11280  | 6500  | 0.282996233 | 0.342819515 | 0.227537435 | 0.373714824 |
| HAS3     | 3038   | 4288  | 0.428982162 | 0.519665776 | 0.246367492 | 0.377665789 |
| CCDC24   | 149473 | 1505  | 1.222242865 | 1.036431092 | 0.561554183 | 0.672521139 |
| TMTC1    | 83857  | 8841  | 0.208061929 | 0.378066991 | 0.167288014 | 0.36634564  |
| SLC36A2  | 153201 | 3439  | 0.534886744 | 1.101528247 | 0.798692032 | 0.824077953 |
| LOC10013 | 1E+08  | 1262  | 1.457587569 | 1.412568525 | 1.506785144 | 1.443628975 |
| SLC16A10 | 117247 | 2918  | 0.630389141 | 0.610918944 | 0.868888669 | 0.208117405 |
| C15orf33 | 196951 | 2009  | 0.915617478 | 0.22183443  | 0.420676479 | 0.201522014 |
| RPSAP58  | 388524 | 1397  | 1.31673265  | 1.914096075 | 1.512417762 | 1.304122954 |
| INE1     | 8552   | 1014  | 1.814078415 | 3.51609759  | 1.875308533 | 2.79487582  |
| RNF157   | 114804 | 4915  | 0.37425748  | 0.272023623 | 0.300914207 | 0.247115601 |
| SLC26A1  | 10861  | 3673  | 0.500810104 | 3.033388031 | 0.69028509  | 1.488042281 |
| ZNF165   | 7718   | 2411  | 0.76295127  | 1.47877352  | 0.876336629 | 1.343368647 |
| PLCB1    | 23236  | 6823  | 0.269599225 | 0.685840009 | 0.433531681 | 1.127406829 |
| MS4A10   | 341116 | 2296  | 0.801165293 | 0.194105126 | 0.460114898 | 0.440829405 |
| NTN3     | 4917   | 1986  | 0.926221305 | 0.112201755 | 0.319161271 | 0.101927927 |
| PRICKLE4 | 29964  | 1646  | 1.117542839 | 0.270756604 | 0.770175315 | 0.73789379  |
| BVES     | 11149  | 5599  | 0.328536437 | 0.278590604 | 0.264153122 | 0.180772337 |
| FLJ34208 | 401106 | 1141  | 1.612160835 | 0.78118382  | 1.29622553  | 0.354827104 |
| STAC2    | 342667 | 3293  | 0.558601735 | 0.473680168 | 0.64161786  | 0.799142186 |
| CYP3A5   | 1577   | 3330  | 0.552395049 | 0.334583611 | 0.824835405 | 0.36473669  |
| ZNF774   | 342132 | 1855  | 0.991631004 | 1.081128929 | 0.683400845 | 1.527765003 |
| TTC28    | 23331  | 11795 | 0.155953837 | 0.113352786 | 0.12539155  | 0.085811303 |
| CDS1     | 1040   | 4546  | 0.404636056 | 0.049017309 | 0.185908281 | 0.267174038 |
| PYGM     | 5837   | 3633  | 0.506324116 | 0.429350067 | 0.581571047 | 0.055719478 |
| CCL22    | 6367   | 2933  | 0.627165193 | 8.888995607 | 0.72037082  | 37.2005309  |
| C2orf16  | 84226  | 6218  | 0.295830735 | 0.537550703 | 0.169897685 | 0.26044241  |
| RAPH1    | 65059  | 9615  | 0.191313106 | 0.139053157 | 0.175795953 | 0.147374107 |
| THSD1    | 55901  | 3366  | 0.54648708  | 1.456422776 | 0.816013636 | 1.804178814 |
| KIF5C    | 3800   | 6927  | 0.265551539 | 0.096506143 | 0.366019509 | 0.029223165 |
| SSTR2    | 6752   | 2996  | 0.61397714  | 0.743767306 | 0.423133701 | 0.608097385 |
| KLHL23   | 151230 | 4089  | 0.449859504 | 0.217982573 | 0.206685998 | -           |
| CHMP3    | 51652  | 3194  | 0.57591594  | 0.906958329 | 1.124558843 | 1.20417921  |
| DHRS1    | 115817 | 1495  | 1.230418403 | 2.831987298 | 1.695931195 | 3.791309808 |
| COX6B2   | 125965 | 1679  | 1.09557803  | 0.132717501 | 0.880877504 | 0.361695407 |
| PRDM7    | 11105  | 3284  | 0.560132616 | 1.15351877  | 0.386025752 | 0.616409449 |
| FGD2     | 221472 | 3045  | 0.604097048 | 1.170877818 | 0.346937211 | 31.44461484 |
| MANEAL   | 149175 | 2858  | 0.643623342 | 1.247488788 | 0.369637441 | 0.849946241 |
| PROX2    | 283571 | 1779  | 1.033994105 | 0.375771812 | 0.593830133 | 0.113788006 |
| CFH      | 3075   | 4200  | 0.43797036  | -           | 0.050305896 | 0.192789393 |
| CDH23    | 64072  | 2684  | 0.685348552 | -           | -           | -           |
| IRGM     | 345611 | 1659  | 1.108785722 | 0.671587356 | 0.764140186 | 0.976148827 |
| VSIG1    | 340547 | 3236  | 0.568441135 | 0.826326396 | 0.457043674 | 0.625552729 |
| KIAA0748 | 9840   | 2010  | 0.915161946 | 2.99327487  | 0.105116797 | 3.222748067 |
| GNGT2    | 2793   | 1057  | 1.740279577 | 1.264896981 | 4.597492442 | 3.830252847 |
| ANKRD37  | 353322 | 934   | 1.969459863 | 0.477157783 | 2.488364427 | 1.950599322 |
| EIF4EBP3 | 8637   | 728   | 2.526752077 | 2.142621969 | 3.482715847 | 1.390308125 |
| LTBP2    | 4053   | 8568  | 0.214691353 | 0.546158541 | 0.123298764 | 1.228559859 |
| GFI1B    | 8328   | 1801  | 1.021363416 | 20.16753338 | 1.759728718 | 23.3787915  |
| TMSL3    | 7117   | 634   | 2.901380934 | 4.569124451 | 2.33279705  | 5.108614838 |
| TCP10L   | 140290 | 2730  | 0.673800554 | 0.571365858 | 0.309574742 | 0.148299533 |
| TMEM150  | 129303 | 1556  | 1.182182206 | 0.716043331 | 3.666252286 | 2.471817735 |
| KIAA0825 | 285600 | 7241  | 0.254036116 | 0.553927403 | 0.350147374 | 0.419338896 |
| SCRN1    | 9805   | 5286  | 0.34799007  | 0.758794613 | 0.359735689 | 0.689315084 |
| LOC44060 | 440600 | 2671  | 0.688684205 | 0.50056013  | 0.791032427 | 0.227363006 |
| TGFB3    | 7043   | 3183  | 0.577906224 | 0.070007127 | 0.464653889 | 0.445178147 |
| LOC10012 | 1E+08  | 2129  | 0.864009165 | 1.046654226 | 0.496206579 | 0.760653313 |
| KBTBD12  | 166348 | 5268  | 0.349179103 | 0.549890832 | 0.320857648 | 0.384261319 |
| GNB3     | 2784   | 1923  | 0.956565529 | 0.811143418 | 0.659234825 | 0.526336097 |
| LMX1B    | 4010   | 5816  | 0.316278458 | 0.498078559 | 0.50859468  | 0.278444103 |

|           |          |       |             |             |             |             |
|-----------|----------|-------|-------------|-------------|-------------|-------------|
| NDRG2     | 57447    | 2142  | 0.858765412 | 0.208060397 | 1.380946153 | 1.512073673 |
| SLC2A12   | 154091   | 5599  | 0.328536437 | 0.35818792  | 0.490570084 | 0.686934881 |
| SRSF12    | 135295   | 3628  | 0.507021916 | 0.368521529 | 0.815321571 | 0.8927403   |
| BSCL2     | 26580    | 2102  | 0.875107285 | 0.742068884 | 1.105676677 | 0.963029795 |
| FNDC8     | 54752    | 1369  | 1.343663632 | 1.464933647 | 0.617340428 | 0.147866226 |
| RORA      | 6095     | 10998 | 0.167255457 | 0.101306003 | 0.096055993 | 0.036811941 |
| CDKN1A    | 1026     | 2327  | 0.79049227  | 2.298231385 | 5.629417793 | 8.612143289 |
| MGC16142  | 84849    | 1291  | 1.424845478 | 1.035628279 | 1.145618381 | 1.568000488 |
| PTRH1     | 138428   | 832   | 2.210908068 | 1.33913873  | 0.761844091 | 0.729911765 |
| ENDOV     | 284131   | 2840  | 0.647702645 | 0.235386639 | 0.520772299 | 0.356388843 |
| EID2B     | 126272   | 1865  | 0.986313948 | 0.955850658 | 1.699341244 | 0.325622836 |
| C3orf27   | 23434    | 2700  | 0.681287227 | 0.495183744 | 0.547775307 | 0.449841918 |
| OSTCP1    | 202459   | 1195  | 1.539310052 | 0.372941732 | 0.530421995 | 0.677586152 |
| DNAL4     | 10126    | 1504  | 1.223055527 | 1.777920357 | 3.231083452 | 1.21134293  |
| GPRC5C    | 55890    | 2389  | 0.769977192 | -           | 1.503491395 | 1.101538392 |
| CNIH3     | 149111   | 2372  | 0.775495579 | 0.469714765 | 0.26722356  | 0.170682009 |
| C2orf84   | 653140   | 1889  | 0.973782696 | 0.235926612 | 0.559250295 | 0.107161918 |
| REEP6     | 92840    | 1393  | 1.320513649 | 0.799830168 | 2.275141005 | 0.290637276 |
| C5orf4    | 10826    | 2997  | 0.613772276 | 0.371759567 | 0.422992515 | 1.958771113 |
| FLJ34690  | 284034   | 2767  | 0.664790572 | 2.093838021 | 1.450816937 | 2.414222074 |
| GBP1      | 2633     | 3050  | 0.603106725 | 1.242018243 | 0.346368461 | 223.667301  |
| DICER1-AS | 400242   | 830   | 2.216235557 | 1.610838685 | 1.018239814 | 1.219450982 |
| DNAJC22   | 79962    | 1854  | 0.992165864 | 1.442282749 | 0.569807879 | 0.655109589 |
| STK32C    | 282974   | 2141  | 0.859166517 | 0.520393939 | 1.085535906 | 0.472743725 |
| B9D1      | 27077    | 932   | 1.973686172 | 1.912726908 | 0.906801551 | 0.868793403 |
| MRPL45P2  | 653479   | 1396  | 1.317675868 | 1.436600403 | 1.210800925 | 1.015044442 |
| MOB4      | 25843    | 3788  | 0.485605996 | 0.352955678 | 0.613551313 | 0.801592646 |
| SPINLW1   | 57119    | 1998  | 0.920658415 | 1.338334443 | 1.057481288 | 0.810525978 |
| LINC00115 | 79854    | 1317  | 1.39671641  | 0.676788716 | 0.962572945 | 0.461113583 |
| IQCD      | 115811   | 1363  | 1.349578512 | 0.326973859 | 2.170202978 | 0.742585704 |
| CXCL14    | 9547     | 1989  | 0.92482429  | 0.224065042 | 0.318679881 | 0.508870948 |
| PCDH12    | 51294    | 5210  | 0.353066317 | 0.42770189  | 0.202768485 | 0.427392993 |
| FMO5      | 2330     | 2632  | 0.698888872 | 1.01595449  | 0.481652192 | 1.153659933 |
| LOC40095  | 400958   | 3067  | 0.59976378  | 0.435929608 | 0.482228017 | 0.198006713 |
| BMS1P5    | 399761   | 4235  | 0.43435077  | 0.210467707 | 0.199560577 | 0.191196093 |
| IFI27     | 3429     | 665   | 2.76612859  | 0.670173488 | 1.588607228 | 1019.145614 |
| MRPL42P5  | 359821   | 667   | 2.757834351 | 4.677147806 | 3.801225092 | 5.766339425 |
| C10orf58  | 84293    | 1773  | 1.037493239 | 0.502724613 | 0.595839711 | 0.456692302 |
| ARHGEF19  | 128272   | 3044  | 0.604295503 | 0.951650756 | 0.971743318 | 0.332504703 |
| KDELR3    | 11015    | 1705  | 1.078871268 | 0.261387313 | 1.11528613  | 0.474906423 |
| LOC33873  | 338739   | 2062  | 0.892083178 | 0.540331437 | 0.92219343  | 0.29451338  |
| EPHB2     | 2048     | 4869  | 0.377793287 | 0.274593573 | 1.171634536 | 35.7545332  |
| NPPA-AS1  | 1E+08    | 1662  | 1.106784303 | 2.681500418 | 1.017014495 | 0.608991766 |
| CTRL      | 1506     | 1197  | 1.536738106 | 2.606230231 | 1.765119143 | 1.522021526 |
| VSIG10L   | 147645   | 3674  | 0.500673792 | 0.181953744 | 0.575081005 | 1.267246556 |
| LOC28369  | 283693   | 1670  | 1.101482343 | 0.667163727 | 1.265178212 | 1.090933992 |
| DPF1      | 8193     | 2329  | 0.789813445 | 1.530838538 | 1.360786355 | 0.434583218 |
| CBWD3     | 445571   | 1743  | 1.055350265 | 0.12784434  | 0.848533178 | 0.464552755 |
| C21orf119 | 84996    | 828   | 2.221588783 | 1.8838512   | 2.296573493 | 0.733437909 |
| LONRF2    | 164832   | 13920 | 0.132146229 | 0.03201619  | 0.166963533 | 0.101796124 |
| ATAD3C    | 219293   | 3859  | 0.47667155  | 0.346461806 | 0.328507014 | 0.734388205 |
| NRSN1     | 140767   | 2408  | 0.763901791 | 0.185076981 | 0.614199888 | 0.504390855 |
| DTL       | 1E+08    | 1641  | 1.120947905 | 1.629489468 | 0.772521979 | 1.233570158 |
| ISG20     | 3669     | 974   | 1.678736493 | 0.915123962 | 1.084624032 | 331.700683  |
| SH3BGR    | 6450     | 1246  | 1.312270742 | 1.788384308 | 0.508711303 | 1.299703775 |
| ABHD8     | 79575    | 2114  | 0.77345759  | 0.843264654 | 0.599672927 | 0.095756321 |
| ZNF329    | 79673    | 3426  | 0.477259003 | 0.975624714 | 0.493367802 | 1.122635259 |
| RGS9BP    | 388531   | 2894  | 0.564992863 | -           | 0.657070785 | 0.069947776 |
| LOC10050  | 1.01E+08 | 2690  | 0.607839905 | 1.325398868 | 0.78544521  | 0.677271289 |
| SLC16A9   | 220963   | 4001  | 0.408670169 | 2.172075657 | 0.105615977 | 0.252972835 |
| CCR6      | 1235     | 3479  | 0.469988314 | 0.256203144 | 0.485851708 | 0.465487469 |
| PMP22     | 5376     | 1828  | 0.894469007 | -           | 0.809077314 | 0.33221367  |

|           |        |       |             |             |             |             |
|-----------|--------|-------|-------------|-------------|-------------|-------------|
| LOC67865  | 678655 | 2364  | 0.691662159 | 1.036869514 | 1.698143175 | 2.31200478  |
| ANKHD1-E  | 404734 | 8349  | 0.195842537 | 0.240207709 | 0.15183957  | 0.339442338 |
| JMJD7     | 1E+08  | 1439  | 1.136267786 | 1.393672107 | 1.761929907 | 0.984713023 |
| PCDHGA6   | 56109  | 4605  | 0.355068262 | 0.193557164 | 0.045881599 | 0.087916987 |
| RBKS      | 64080  | 1196  | 1.367131559 | 2.794724307 | 1.589935495 | 2.36956863  |
| ZNF542    | 147947 | 3752  | 0.435791403 | 0.475122995 | 0.281562848 | 0.4855703   |
| CD52      | 1043   | 523   | 3.126365859 | 209.1985625 | 9.695667825 | 566.645995  |
| LOC10026  | 1E+08  | 1594  | 1.025777506 | 1.118357263 | 0.530200154 | 0.380982804 |
| ZNF582    | 147948 | 2297  | 0.711836893 | -           | 0.73586334  | 0.44063749  |
| MBOAT2    | 129642 | 3804  | 0.429834212 | 0.585785186 | 0.444342295 | 0.425717903 |
| CD209     | 30835  | 4428  | 0.36926137  | 0.352264858 | 0.190862476 | 0.548587704 |
| ACE       | 1636   | 4969  | 0.329058029 | -           | 0.212602899 | 0.122215051 |
| CCDC103   | 388389 | 1272  | 1.285447598 | 0.525548785 | 1.162730605 | 1.113995315 |
| BEND2     | 139105 | 4720  | 0.346417234 | 0.424892831 | 0.358109765 | 0.600424594 |
| LAT       | 27040  | 1767  | 0.925347676 | 1.008863315 | 2.989314677 | 3.322262041 |
| C2orf83   | 56918  | 2103  | 0.777503255 | 0.529797158 | 0.60280959  | 0.673800305 |
| C3orf25   | 90288  | 2169  | 0.753844788 | 1.130087382 | 1.168933673 | 1.39992298  |
| ZNF709    | 163051 | 4916  | 0.332605644 | 0.362624385 | 0.257873997 | 0.411775555 |
| PIPSL     | 266971 | 3776  | 0.433021542 | 0.354077359 | 0.447637206 | 0.42887471  |
| HSD11B1L  | 374875 | 1677  | 0.975008554 | 0.797254686 | 1.007917764 | 0.241417845 |
| PITPNM3   | 83394  | 7161  | 0.228332544 | 0.280057836 | 0.118019696 | 0.254414155 |
| MTERFD3   | 80298  | 1775  | 0.921177095 | 0.376618622 | 0.952269347 | 0.570222149 |
| CLDN20    | 49861  | 1209  | 1.352431219 | 1.29018097  | 0.873799675 | 0.502304871 |
| MEIS1     | 4211   | 3198  | 0.511284973 | 0.487751342 | 0.198203341 | 0.126597163 |
| ZNF763    | 284390 | 2639  | 0.619586716 | 0.506629825 | 0.720561899 | 0.536946586 |
| ACER2     | 340485 | 2852  | 0.573313234 | 0.078132077 | 1.407577302 | 0.212933587 |
| EBF1      | 1879   | 5288  | 0.309207516 | 0.084278625 | 0.199777573 | 0.038280799 |
| HNF1A-AS1 | 283460 | 2455  | 0.666024173 | 0.635368144 | 0.688504314 | 0.329822995 |
| GSDMA     | 284110 | 2164  | 0.755586573 | 0.20594518  | 0.976362113 | 0.748350695 |
| C7orf61   | 402573 | 1020  | 1.603028769 | 0.436926833 | 1.242851537 | 1.190758017 |
| FAM186B   | 84070  | 3106  | 0.52642928  | 0.143485309 | 0.272098856 | 0.260693964 |
| DUSP8     | 1850   | 4491  | 0.36408135  | 0.446558486 | 0.658647664 | 0.450743404 |
| STON1     | 11037  | 5651  | 0.289345133 | 0.039432434 | 0.261722408 | 0.25075244  |
| MN1       | 4330   | 7569  | 0.216024487 | 0.147200875 | 0.083743465 | 0.106977864 |
| CCDC19    | 25790  | 1836  | 0.890571538 | 0.849579953 | 0.690473076 | 0.220510744 |
| CHRNA3    | 1136   | 3318  | 0.492793654 | 0.134317471 | 0.254713395 | -           |
| OSM       | 5008   | 1869  | 0.874847161 | 1.430707446 | 0.678281738 | 7.364988058 |
| RCN3      | 57333  | 1882  | 0.868804115 | 0.710412385 | 0.561330397 | 1.183165511 |
| DNAH10    | 196385 | 13716 | 0.119210363 | 0.162461858 | 0.169446805 | 0.162344524 |
| SIGLEC1   | 6614   | 6736  | 0.242738917 | 0.363889479 | 1.223293601 | 120.9885098 |
| TMEM220   | 388335 | 3092  | 0.528812854 | 0.576539935 | 0.614994454 | 0.982028766 |
| SLC26A4   | 5172   | 4930  | 0.331661125 | 0.54239193  | 0.428569496 | 0.574848698 |
| MGC16121  | 84848  | 786   | 2.080266341 | 2.835021434 | 2.956911419 | 2.832973909 |
| RWDD2A    | 112611 | 1432  | 1.141822168 | 0.9336565   | 1.32790702  | 1.696331254 |
| LOC40054  | 400548 | 2015  | 0.811458732 | 0.442347761 | 0.524279805 | 0.200921948 |
| ADAMTS6   | 11174  | 7289  | 0.224322862 | 0.275139822 | 0.115947187 | 0.249946463 |
| UTS2D     | 257313 | 2408  | 0.679023814 | 0.555230942 | 0.438714205 | 0.756586282 |
| LOX       | 4015   | 5177  | 0.315837231 | 0.086085642 | 0.204061002 | 0.11730473  |
| TYW1B     | 441250 | 3171  | 0.515638393 | 0.772992599 | 0.732933578 | 1.978963971 |
| A2ML1     | 144568 | 5190  | 0.315046116 | 0.38641506  | 0.203549866 | 0.312029076 |
| LOC10027  | 1E+08  | 5052  | 0.323651889 | 0.661617235 | 0.460042038 | 0.560966762 |
| ADAT3     | 113179 | 1597  | 1.02385056  | 1.116256404 | 1.058408322 | 1.901335594 |
| EYS       | 346007 | 10589 | 0.154413953 | 0.084175157 | 0.139672616 | 0.019116901 |
| SH3GL1P1  | 6458   | 2497  | 0.654821524 | 0.356960648 | 0.592308102 | 0.567481794 |
| CILP2     | 148113 | 4199  | 0.389399701 | 0.212272146 | 0.855403892 | 0.337461786 |
| SUGT1P1   | 441394 | 820   | 1.994011396 | 1.358735883 | 1.288321716 | 1.728051269 |
| GP1BA     | 2811   | 2501  | 0.653774228 | 0.712779479 | 1.3516818   | 0.647513356 |
| ADAMTS4   | 9507   | 4410  | 0.370768559 | 0.656876395 | 0.431193391 | 0.413120128 |
| TNNT1     | 7138   | 1059  | 1.543993715 | 1.47292615  | 0.5985404   | 2.484962435 |
| MMP15     | 4324   | 4456  | 0.366941056 | 0.10001467  | 0.426742112 | 0.04542838  |
| SLC23A1   | 9963   | 2378  | 0.687590136 | 0.187411846 | 0.621948414 | 0.51075407  |
| LOC28618  | 286186 | 2520  | 0.648844978 | 0.442128343 | 0.586902115 | 0.481973483 |

|           |          |       |             |             |             |             |
|-----------|----------|-------|-------------|-------------|-------------|-------------|
| GAL3ST4   | 79690    | 2561  | 0.638457378 | 1.04412035  | 0.247502649 | 0.632343188 |
| SERPINI1  | 5274     | 1929  | 0.847635741 | 1.270689234 | 1.314368655 | 4.512411149 |
| CHAD      | 1101     | 1712  | 0.955075552 | 0.130159278 | 0.493655984 | 0.236482317 |
| LOC28545  | 285456   | 3773  | 0.433365848 | 0.295299079 | 0.279995708 | 0.053651965 |
| GBP6      | 163351   | 4867  | 0.335954252 | 0.274706412 | 0.173646814 | 0.249552738 |
| SIGLEC7   | 27036    | 1754  | 0.932206012 | 1.397468376 | 3.131929188 | 8.42491847  |
| B9D2      | 80776    | 1049  | 1.558712435 | 4.673326086 | 2.81981569  | 4.052436723 |
| AK5       | 26289    | 3937  | 0.415313524 | 0.339597691 | 0.16099931  | -           |
| ITGA2     | 3673     | 7878  | 0.207551326 | 0.028285439 | 0.241376346 | 0.025695464 |
| LINC00346 | 283487   | 6322  | 0.258634822 | 0.211483092 | 0.200523342 | 0.256158004 |
| GOLGA6C   | 653641   | 5379  | 0.303976454 | 0.372837732 | 0.392795615 | 0.48923131  |
| ADM2      | 79924    | 4246  | 0.385089342 | 0.314883681 | 0.497608953 | 0.476751915 |
| RGS20     | 8601     | 2120  | 0.771268559 | 0.210219514 | 0.59797574  | 1.145823753 |
| FAM24B    | 196792   | 788   | 2.074986478 | 2.545043354 | 3.217534437 | 3.33956246  |
| LIN28A    | 79727    | 4014  | 0.407346623 | 0.444110981 | 0.105273922 | 0.504307083 |
| SLCO4C1   | 353189   | 5334  | 0.306540934 | 4.17759064  | 1.267550124 | 8.956357641 |
| PBX4      | 80714    | 1747  | 0.935941239 | 0.510206491 | 1.088473298 | 0.347616822 |
| TAS2R14   | 50840    | 954   | 1.71393013  | 2.569349614 | 1.771779969 | 1.69751667  |
| LOC10027  | 1E+08    | 2159  | 0.757336426 | 0.206422126 | 0.391449303 | 0.187520948 |
| LOC28597  | 285972   | 2043  | 0.800337418 | 1.745140948 | 1.551283123 | 2.278934825 |
| HEATR8-T  | 1.01E+08 | 6472  | 0.252640504 | 0.172151332 | 0.130583907 | 0.156388182 |
| NUAK2     | 81788    | 3443  | 0.474902511 | 0.906087013 | 0.368198829 | 1.117092186 |
| LOC10012  | 1E+08    | 1084  | 1.508385004 | 0.411130415 | 0.974560707 | 0.560227481 |
| CCBP2     | 1238     | 2978  | 0.549056194 | 3.292356658 | 0.638536888 | 2.515066464 |
| RHD       | 6007     | 2833  | 0.577158258 | 0.629248669 | 0.671218797 | 0.928900536 |
| GRIN3A    | 116443   | 7771  | 0.210409129 | 0.630847904 | 0.217511014 | 3.41245413  |
| FHOD3     | 80206    | 4942  | 0.330855796 | 0.135268728 | 0.171011543 | 0.122882758 |
| TMEM213   | 155006   | 3398  | 0.481191685 | 0.2623104   | 0.808328987 | 0.47658355  |
| TECTA     | 7007     | 6468  | 0.252796745 | 0.137806237 | 0.228663162 | 0.500751671 |
| LOC10030  | 1E+08    | 3115  | 0.524908297 | 1.001495212 | 0.474797217 | 0.584866699 |
| PRICKLE1  | 144165   | 4321  | 0.37840531  | 0.515697026 | 0.195588763 | 2.482927502 |
| SLC25A35  | 399512   | 2785  | 0.587105689 | 1.440211248 | 0.606922115 | 1.162966538 |
| LOC64699  | 646999   | 2602  | 0.628397135 | 0.685112021 | 0.162401815 | 0.077797411 |
| ZNF716    | 441234   | 5210  | 0.313836726 | 0.342161512 | 0.324429576 | 0.50510081  |
| PIGZ      | 80235    | 2721  | 0.600914864 | 0.900830405 | 1.320044448 | 0.44637015  |
| ALPK3     | 57538    | 10936 | 0.149514388 | 0.448273506 | 0.231841362 | 0.407227047 |
| AOC3      | 8639     | 4040  | 0.404725085 | 0.275783026 | 0.261491041 | 0.250530771 |
| ITGA7     | 3679     | 4150  | 0.393997432 | 0.214778491 | 0.458207916 | 0.63411451  |
| LRRC8E    | 80131    | 3625  | 0.451059129 | 0.430297598 | 0.291427257 | -           |
| ZNF347    | 84671    | 4565  | 0.358179484 | 0.488132935 | 0.416552651 | 0.399093049 |
| DISP2     | 85455    | 5032  | 0.324938264 | 0.619963749 | 0.16795291  | 1.045936096 |
| SP8       | 221833   | 3738  | 0.437423581 | 0.357676862 | 0.678281738 | 0.162462972 |
| TMEM17    | 200728   | 1925  | 0.849397062 | 0.578786194 | 0.43903327  | 0.946420658 |
| TSPAN4    | 7106     | 1479  | 1.105537082 | 2.410630802 | 2.428560475 | 0.410606213 |
| SGSM1     | 129049   | 6201  | 0.263681559 | 0.287479677 | 0.170363459 | 0.261156411 |
| ANK1      | 286      | 8486  | 0.192680809 | 0.210070879 | 0.323674511 | 1.669811502 |
| FAM106C   | 1E+08    | 1759  | 0.929556193 | 1.013451665 | 0.600582039 | 0.690490721 |
| LOC44120  | 441204   | 1649  | 0.991564187 | 1.486452112 | 0.512516098 | 0.491034234 |
| SCG5      | 6447     | 1244  | 1.314380502 | 0.537377857 | 1.358744446 | 0.162724166 |
| GPR83     | 10888    | 4300  | 0.380253336 | 0.414572437 | 0.393087928 | 0.329535358 |
| FAM82A1   | 151393   | 2000  | 0.817544672 | 0.111416342 | 0.316927142 | 0.506072157 |
| ANKRD31   | 256006   | 6036  | 0.270889553 | 0.073834554 | 0.140016409 | 0.033536922 |
| UPK3B     | 80761    | 1625  | 1.006208827 | 1.782661478 | 1.170192524 | 2.242288944 |
| LOC28636  | 286367   | 3413  | 0.479076866 | 1.30578778  | 0.371435268 | 1.067600215 |
| RIBC2     | 26150    | 1414  | 1.156357386 | 0.472770901 | 1.494234522 | 0.429481322 |
| AMT       | 275      | 2215  | 0.73818932  | 0.804813308 | 0.858493387 | 0.731120047 |
| ATP8B2    | 57198    | 5872  | 0.27845527  | 0.265638418 | 0.143926949 | 0.310262222 |
| FLJ33630  | 644873   | 2977  | 0.549240626 | 1.272474182 | 0.851668504 | 1.019964039 |
| FHDC1     | 85462    | 6480  | 0.252328603 | 0.30948984  | 0.42387375  | 0.937170662 |
| FLJ37201  | 283011   | 3662  | 0.446501732 | 0.425949971 | 0.46157239  | 0.331669355 |
| MEFV      | 4210     | 3507  | 0.466235912 | 0.698933428 | 0.843452141 | 0.808099253 |
| LOC64516  | 645166   | 1104  | 1.481059189 | 2.018411999 | 2.296573493 | 1.466875819 |

|          |        |      |             |             |             |             |
|----------|--------|------|-------------|-------------|-------------|-------------|
| PDZD7    | 79955  | 4164 | 0.392672753 | 4.923296589 | 0.659630619 | 3.840509167 |
| AQP11    | 282679 | 2153 | 0.759446978 | 0.931488232 | 1.079485543 | 0.282065299 |
| NR2F1    | 7025   | 3210 | 0.509373628 | 0.347091409 | 0.724028777 | 0.063061951 |
| CD302    | 9936   | 3995 | 0.409283941 | 0.446223148 | 0.105774599 | 0.202682216 |
| TTL      | 646982 | 3972 | 0.411653913 | 0.673210528 | 0.531935452 | 0.356747744 |
| TSPYL4   | 23270  | 4144 | 0.394567892 | 0.107544732 | 0.356899935 | 0.195394655 |
| MB21D2   | 151963 | 3388 | 0.482611967 | -           | 0.436538763 | 1.135226799 |
| LOC64465 | 644656 | 1161 | 1.408345688 | 0.959658418 | 0.90992576  | 0.174357332 |
| TMEM119  | 338773 | 2701 | 0.605364437 | 0.412500342 | 1.642717508 | 0.14989179  |
| FHIT     | 2272   | 1122 | 1.457298881 | 0.993015529 | 1.506486712 | 0.180417881 |
| ZNF345   | 25850  | 3162 | 0.517106055 | 0.704720698 | 0.334099876 | 0.640192482 |
| NEK8     | 284086 | 2858 | 0.572109638 | 1.637329034 | 1.2567673   | 1.558234774 |
| MCC      | 4163   | 8679 | 0.188396053 | 0.231074336 | 0.292132404 | 0.233239847 |
| KCNMB3   | 27094  | 2141 | 0.76370357  | 0.416315151 | 0.888165741 | 0.472743725 |
| MYL5     | 4636   | 661  | 2.473660128 | 4.045374004 | 1.598220585 | 2.756217499 |
| NXN      | 64359  | 3024 | 0.540704148 | -           | 0.419215796 | 0.535526092 |
| LOC28308 | 283089 | 2500 | 0.654035738 | 0.802197665 | 0.169027809 | 1.052630087 |
| KIAA1486 | 57624  | 4590 | 0.356228615 | 0.291284555 | 0.184126154 | 0.441021488 |
| C6orf123 | 26238  | 1672 | 0.977924249 | 0.533092547 | 0.505465936 | 1.452838729 |
| ATP8B1   | 5205   | 5949 | 0.274851125 | 0.449486    | 0.568256208 | 0.476383271 |
| LAMB1    | 3912   | 5866 | 0.278740086 | 0.113961482 | 0.144074164 | 0.103526524 |
| LRRC1    | 55227  | 3180 | 0.514179039 | 0.700731713 | 0.398650493 | 0.572911876 |
| HLA-J    | 3137   | 1580 | 1.034866674 | 0.846200069 | 0.53489813  | 0.384358601 |
| C6orf192 | 116843 | 2440 | 0.670118584 | 0.091324871 | 0.346368461 | 0.66370119  |
| C7orf13  | 129790 | 2299 | 0.711217636 | 0.872333259 | 0.643320283 | 0.528304992 |
| INO80B   | 83444  | 1266 | 1.291539766 | 1.93614497  | 0.834457983 | 0.959378497 |
| LOC10028 | 1E+08  | 1195 | 1.368275602 | 0.932354329 | 1.237651322 | 1.524568842 |
| GATSL3   | 652968 | 1644 | 0.994579893 | 0.948800969 | 0.771112268 | 1.108187206 |
| VAMP5    | 10791  | 694  | 2.356036519 | 2.568676481 | 1.522224505 | 3.208526646 |
| PLAC2    | 257000 | 3693 | 0.442753681 | 0.181017616 | 0.629334518 | 0.493327854 |
| C5orf45  | 51149  | 1229 | 1.330422575 | 1.269185348 | 2.062991974 | 0.82355111  |
| CBX7     | 23492  | 3964 | 0.412484698 | 0.899425569 | 0.426407187 | 1.021336342 |
| DHRS4L2  | 317749 | 1585 | 1.03160211  | 0.843530668 | 0.533210754 | 0.127715371 |
| MYO5C    | 55930  | 6975 | 0.234421411 | 0.351420721 | 0.121166888 | 0.116088237 |
| PDZK1P1  | 728939 | 3498 | 0.46743549  | 0.573325947 | 0.785220668 | 0.578698865 |
| C16orf79 | 283870 | 1061 | 1.541083265 | 1.680171044 | 1.593099049 | 1.144743806 |
| SH3D19   | 152503 | 5291 | 0.309032195 | 0.631731293 | 0.279530019 | 0.11477728  |
| TAS2R5   | 54429  | 1150 | 1.421816821 | 1.356372864 | 2.204710553 | 0.176025098 |
| TM6SF1   | 53346  | 1909 | 0.856516157 | 0.233454882 | 2.434921294 | 3.28721569  |
| PLEKHF1  | 79156  | 1774 | 0.921696361 | 1.256103071 | 1.429209209 | 0.912869731 |
| TLL2     | 7093   | 6788 | 0.240879397 | 0.131309773 | 0.186757302 | 0.059643153 |
| SCO2     | 9997   | 1020 | 1.603028769 | 1.529243915 | 1.035709615 | -           |
| ZNF565   | 147929 | 1950 | 0.838507356 | 0.68563903  | 0.433404639 | 0.31142902  |
| GPR146   | 115330 | 1776 | 0.920658415 | 0.125468854 | 1.546566384 | 1.367762588 |
| TTC21A   | 199223 | 4269 | 0.383014604 | 0.208791459 | 0.098985599 | 1.422549986 |
| DUSP9    | 1852   | 2394 | 0.682994714 | 0.093079651 | 0.264767871 | -           |
| SLC9A9   | 285195 | 3647 | 0.448338181 | 0.12220054  | 0.463470823 | 0.499550251 |
| PRPH     | 5630   | 1833 | 0.892029102 | 0.121567204 | 1.498473485 | 0.110435823 |
| CCDC7    | 221016 | 2173 | 0.75245713  | 0.615276626 | 0.583390966 | -           |
| UCP3     | 7352   | 2438 | 0.670668312 | 0.731198309 | 0.953294657 | 0.49818424  |
| ZNF235   | 9310   | 3190 | 0.512567193 | 0.698535062 | 0.927268545 | 0.951859857 |
| ADAM11   | 4185   | 4402 | 0.371442377 | 2.126072867 | 2.687857028 | 4.230680462 |
| LOC25551 | 255512 | 1024 | 1.596766938 | 0.652830131 | 0.618998324 | 0.197684436 |
| F12      | 2161   | 2060 | 0.793732691 | 1.514396887 | 1.435915854 | 1.17919726  |
| HCAR1    | 27198  | 2977 | 0.549240626 | 0.673662802 | 0.638751378 | 0.475983218 |
| LOC64223 | 642236 | 1071 | 1.526694066 | 1.872543569 | 0.197278022 | 0.945046046 |
| LOC10013 | 1E+08  | 5001 | 0.326952478 | 0.267345753 | 0.253491015 | 0.202388385 |
| ITGA3    | 3675   | 5044 | 0.283644563 | 0.17671109  | 0.544548354 | 2.086895494 |
| HSPA1A   | 3303   | 2445 | 0.585154673 | 0.182276225 | 0.518490212 | 0.910722901 |
| ZNF433   | 163059 | 2321 | 0.616416707 | 1.536115018 | 1.18341314  | 1.046594724 |
| ARHGEF25 | 115557 | 2614 | 0.547323327 | 0.255737588 | 0.161656283 | 0.077440269 |
| CDC14C   | 168448 | 2893 | 0.494539639 | 0.154049557 | 0.219099303 | 0.209915862 |

|           |        |       |             |             |             |             |
|-----------|--------|-------|-------------|-------------|-------------|-------------|
| LOC145820 | 145820 | 2684  | 0.533048873 | 0.332090439 | 0.15744021  | 0.527944128 |
| HSD17B6   | 8630   | 1512  | 0.946232259 | 0.294752228 | 1.257647389 | 1.204933708 |
| KCNN3     | 3782   | 13080 | 0.109380977 | 0.102216828 | 0.064613077 | 0.123809702 |
| HSPA1L    | 3305   | 2550  | 0.561060069 | 1.398165865 | 0.579997384 | 2.619667638 |
| LIN7B     | 64130  | 755   | 1.894971094 | 0.590285258 | 2.79847366  | 1.340588496 |
| ATP1A1OS  | 84852  | 1828  | 0.782660381 | 0.853298027 | 0.231164947 | 1.66106835  |
| NR4A2     | 4929   | 3546  | 0.403469593 | 1.068289803 | 0.476671768 | 1.370076907 |
| C2orf27A  | 29798  | 1222  | 1.170788197 | 1.276455641 | 2.074809441 | 1.822191074 |
| LRTM2     | 654429 | 3986  | 0.358932056 | 0.167711504 | 0.424053711 | 0.253924816 |
| LOC100129 | 1E+08  | 1831  | 0.781378032 | 0.486799967 | 0.692358584 | 0.442225807 |
| CAND2     | 23066  | 4599  | 0.311090058 | 0.145357263 | 0.229707286 | 0.044015843 |
| CEACAM19  | 56971  | 2265  | 0.631657031 | 1.475713144 | 1.026107009 | 0.714980531 |
| CATSPER3  | 347732 | 1367  | 1.046600714 | 1.141059834 | 0.77280454  | 0.296165125 |
| C15orf27  | 123591 | 2414  | 0.592669087 | 0.461542429 | 0.525148537 | 0.922418182 |
| FAM135B   | 51059  | 6962  | 0.205501749 | 0.032006993 | 0.424875992 | -           |
| PDZD2     | 23037  | 11659 | 0.12271234  | 0.267575057 | 0.054366093 | 0.24307437  |
| LOC151009 | 151009 | 2204  | 0.649139372 | 0.606622554 | 0.766913834 | 0.459230633 |
| PCOLCE    | 5118   | 1651  | 0.866567642 | 1.619619756 | 1.151764296 | 1.471318204 |
| NWD1      | 284434 | 7645  | 0.187142338 | 0.145737531 | 0.138184932 | 0.291264551 |
| ATP6V1G2  | 534    | 1603  | 0.892516018 | 0.139009785 | 1.977087599 | 0.252562524 |
| BTBD18    | 643376 | 3061  | 0.467397313 | 0.800770837 | 0.414148503 | 0.330658058 |
| FAAH      | 2166   | 2105  | 0.679668967 | 1.482022606 | 1.104100891 | 0.673160114 |
| ANGPTL6   | 83854  | 1857  | 0.770437898 | 1.079964546 | 1.592884577 | 2.834222098 |
| LHFPL5    | 222662 | 2147  | 0.666373161 | 0.311363789 | 0.492046487 | 0.754276154 |
| TNC       | 3371   | 7616  | 0.187854934 | 0.08777548  | 0.110968887 | 0.37211188  |
| B3GALT4   | 8705   | 1704  | 0.83961454  | 2.353866388 | 1.487920855 | 3.445092151 |
| ATP1A2    | 477    | 5496  | 0.260317172 | 0.283811644 | 0.26910359  | 0.184160174 |
| B3GNT9    | 84752  | 2722  | 0.525607339 | 0.573045111 | 0.543348027 | 0.446206164 |
| AMH       | 268    | 2065  | 0.692834468 | 1.510730066 | 0.920853681 | 1.372399071 |
| ENPP6     | 133121 | 3936  | 0.363491661 | 0.22645598  | 0.161040214 | 0.257150486 |
| HTRA4     | 203100 | 2130  | 0.671691632 | 0.627697703 | 0.297584171 | 0.760296199 |
| CTSL2     | 1515   | 4542  | 0.314994094 | 0.196241906 | 0.372144009 | 0.26740933  |
| C1orf192  | 257177 | 774   | 1.848453716 | 0.575795051 | 1.091910911 | 1.307679993 |
| FSIP2     | 401024 | 21054 | 0.067953984 | 0.190509562 | 0.010035374 | 0.057688476 |
| IL1RL1    | 9173   | 2542  | 0.562825797 | 0.701283036 | 11.38710162 | 6.928131816 |
| SLC6A10P  | 386757 | 3839  | 0.372676003 | 0.290222304 | 0.825546085 | 0.580025395 |
| MPV17L    | 255027 | 2309  | 0.619620258 | 1.158073719 | 0.823543894 | 0.613686462 |
| ITGB8     | 3696   | 8787  | 0.162820437 | 0.025359359 | 0.216406379 | 0.115186561 |
| DOK4      | 55715  | 2750  | 0.5202557   | 0.081030067 | 0.845139045 | 0.220831487 |
| KIAA1751  | 85452  | 4710  | 0.303758636 | 0.662347683 | 0.224293802 | 0.214892636 |
| IAPP      | 3375   | 1992  | 0.718224486 | 1.006774178 | 0.636399884 | 1.219450982 |
| ATP6V1C2  | 245973 | 3250  | 0.440216362 | 0.205691709 | 0.130021392 | 0.062285804 |
| DYRK1B    | 9149   | 2540  | 0.563268967 | 0.175458807 | 0.665463815 | 0.159392805 |
| ARHGAP4   | 393    | 3405  | 0.420177144 | 10.79805961 | 0.806667224 | 16.70558311 |
| C12orf77  | 196415 | 1516  | 0.943735604 | 0.734936295 | 0.696849477 | 0.534113095 |
| TMEM79    | 84283  | 2240  | 0.638706775 | 1.691140911 | 2.169441746 | 1.44592045  |
| ATL1      | 51062  | 2821  | 0.507161707 | 3.791552239 | 1.273250955 | 7.821604418 |
| SNED1     | 25992  | 6834  | 0.209350772 | 0.1630324   | 0.247333639 | 0.148104231 |
| ALX3      | 257    | 1478  | 0.967999443 | 0.301532726 | 0.285906308 | 0.82176805  |
| HoxA5     | 3202   | 1657  | 0.863429799 | 0.134479592 | 0.382531252 | 0.48866352  |
| TFEB      | 7942   | 2364  | 0.605204389 | 1.790956434 | 1.251263392 | 5.994086467 |
| GGT6      | 124975 | 2635  | 0.542961357 | 0.67653187  | 0.24055191  | 0.460938587 |
| TRAPPC2P  | 10597  | 755   | 1.894971094 | 1.770855773 | 1.958931562 | 2.413059294 |
| LOC400891 | 400891 | 5153  | 0.277644707 | 0.259459753 | 0.16400913  | 0.117851075 |
| CMKLR1    | 1240   | 5496  | 0.260317172 | -           | 1.037970989 | 0.77347273  |
| GRTP1     | 79774  | 1423  | 1.005413335 | 0.939561566 | 0.445435196 | 0.426764996 |
| PRKAG2    | 51422  | 3423  | 0.417967624 | 0.455690562 | 0.864150353 | 0.591378507 |
| TREX2     | 11219  | 1255  | 1.140002531 | 0.88777962  | 0.336708783 | 0.322595798 |
| CXCL10    | 3627   | 1227  | 1.166017259 | 11.98611018 | 1.033177317 | 260.6663435 |
| SPDYE1    | 285955 | 2691  | 0.531662273 | 0.662453169 | 1.02069933  | 0.977917212 |
| GNG10     | 2790   | 1269  | 1.127425671 | 1.755970723 | 1.165479377 | 3.0308498   |
| OVCA2     | 124641 | 1076  | 1.329649792 | 1.449655012 | 0.981806512 | 0.188130914 |



|           |          |       |             |             |             |             |
|-----------|----------|-------|-------------|-------------|-------------|-------------|
| LOC100123 | 1E+08    | 525   | 2.725148907 | 2.971102463 | 2.817130151 | 5.012524226 |
| ABCB5     | 340273   | 5401  | 0.264895978 | 0.371319045 | 0.195597816 | 0.337318972 |
| SEPHS1P1  | 168474   | 4125  | 0.346837134 | 0.702260582 | 0.153661645 | 0.245368319 |
| APOL1     | 8542     | 3039  | 0.470780907 | 5.792623262 | 0.556195489 | 27.2436344  |
| CACNB3    | 784      | 2958  | 0.483672473 | 0.903986551 | 0.499997745 | 0.889646795 |
| CD160     | 11126    | 1559  | 0.917705694 | 1.000531618 | 0.5421033   | 1.298453258 |
| C14orf45  | 80127    | 3123  | 0.458118212 | 0.499464871 | 0.067654422 | 0.388912321 |
| SPTBN5    | 51332    | 11739 | 0.121876069 | 0.075929018 | 0.107991189 | 1.034647907 |
| ASPRV1    | 151516   | 2216  | 0.645624177 | 0.201112531 | 0.381380436 | 0.365395059 |
| LOC728024 | 728024   | 1503  | 0.951898321 | 0.296517212 | 0.562301427 | 0.673416044 |
| LILRB3    | 11025    | 2843  | 0.503237136 | 1.018932431 | 0.668857845 | 2.420886859 |
| CBWD6     | 644019   | 1719  | 0.832288061 | 0.777775514 | 0.860380064 | 0.588798322 |
| TRPC1     | 7220     | 4077  | 0.350920573 | 0.054656042 | 0.051823586 | 0.099302852 |
| LOC100133 | 1E+08    | 1965  | 0.728093219 | 0.907206859 | 0.752668361 | 0.824137864 |
| RP11-165H | 149620   | 2844  | 0.503060189 | 0.313407433 | 0.148582814 | 0.213532556 |
| TAGLN     | 6876     | 1574  | 0.908960087 | 1.274138604 | 1.208108547 | 1.157471262 |
| TSSK6     | 83983    | 1442  | 0.992165864 | 1.236242356 | 1.172176207 | 0.561522505 |
| HP        | 3240     | 1461  | 0.979262954 | 0.457561981 | 0.723082688 | 1.108440044 |
| KRT81     | 3887     | 1926  | 0.74283654  | 0.347091409 | 0.21940266  | -           |
| PCDHA9    | 9752     | 6388  | 0.22396731  | 0.279064101 | 0.429978381 | 0.475333899 |
| ARHGEF16  | 27237    | 2919  | 0.490134696 | 1.984806373 | 0.868591003 | 1.248276647 |
| BCAR1     | 9564     | 3533  | 0.404954197 | 0.189215413 | 0.717638589 | 0.859448895 |
| PHEX      | 5251     | 2861  | 0.500071016 | 0.077886293 | 0.295399876 | 0.495282083 |
| LOC100284 | 1E+08    | 3109  | 0.460181144 | 0.430040562 | 0.611631667 | 0.195331807 |
| FAM92B    | 339145   | 1897  | 0.754192502 | 0.234931666 | -           | 0.426839985 |
| LRP4      | 4038     | 8244  | 0.173544781 | -           | 0.179402393 | -           |
| CHRM3     | 1131     | 2757  | 0.518934776 | 0.64659466  | 0.919628994 | 1.027930389 |
| C18orf56  | 494514   | 860   | 1.663608345 | 2.331969957 | 1.228399775 | 0.470764798 |
| CYP1A2    | 1544     | 3127  | 0.457532196 | 0.783869374 | 0.540543042 | 0.776829663 |
| ADIPOQ    | 9370     | 4629  | 0.30907392  | 0.192553627 | 0.22821858  | 0.174922327 |
| KIAA1377  | 57562    | 7043  | 0.203138318 | 0.348027763 | 0.149996281 | 0.172451111 |
| PCDHGB2   | 56103    | 4602  | 0.310887261 | 0.871575038 | 0.183646033 | 0.703794395 |
| DLK1      | 8788     | 1599  | 0.894748703 | 0.139357526 | 0.660677803 | -           |
| DUSP28    | 285193   | 1555  | 0.920066351 | 2.29281219  | 1.76636778  | 1.822510663 |
| FLJ14107  | 80094    | 1839  | 0.777978889 | 1.69638803  | 1.148911155 | 1.651132651 |
| STX11     | 8676     | 5509  | 0.259702882 | 1.011221114 | 0.421879175 | 15.98412695 |
| DSC1      | 1823     | 4271  | 0.334980842 | 0.313040531 | 0.098939247 | 0.284376768 |
| TUFT1     | 7286     | 3127  | 0.457532196 | 0.356304261 | 0.13513576  | 0.517886442 |
| CCL16     | 6360     | 1497  | 0.955713545 | 0.297705658 | 0.28227757  | 0.540892085 |
| CCDC17    | 149483   | 2267  | 0.631099769 | 0.688058577 | 0.559200956 | 0.803643479 |
| TEN1-CDK3 | 1.01E+08 | 3330  | 0.429640593 | 0.267666889 | 0.317244386 | 0.303947242 |
| ZNF671    | 79891    | 2477  | 0.577595146 | 0.35984285  | 0.341194609 | 0.0817234   |
| TMEM105   | 284186   | 3335  | 0.428996455 | 0.400898383 | 0.380122509 | 0.364189858 |
| MRO       | 83876    | 5265  | 0.271738495 | 0.338587175 | 0.401300591 | 0.346032244 |
| LOC154093 | 154092   | 1687  | 0.848075386 | -           | 0.250485787 | -           |
| C15orf37  | 283687   | 2084  | 0.686517839 | 1.924658505 | 1.115226667 | 2.914043133 |
| RABL2A    | 11159    | 2187  | 0.654185266 | 1.018896592 | 1.352531623 | 0.647920458 |
| CXADR     | 1525     | 5744  | 0.249077851 | 0.271557938 | 0.367835587 | 0.140967175 |
| YPEL4     | 219539   | 1731  | 0.826518299 | -           | 2.07500921  | 3.508299185 |
| ProSAPIP1 | 9762     | 5247  | 0.272670703 | 0.339748709 | 0.563748172 | 0.192899622 |
| HS3ST3A1  | 9955     | 2546  | 0.561941546 | 0.175045314 | 0.746882503 | -           |
| MAPK13    | 5603     | 1888  | 0.757787699 | 0.826180505 | 0.447637206 | 4.610403129 |
| ADAMTSL2  | 9719     | 4083  | 0.350404893 | 0.272878624 | 0.155242293 | 0.495784626 |
| EGFL7     | 51162    | 1571  | 0.910695847 | 1.134730412 | 0.672453092 | 1.159681583 |
| BCAR3     | 8412     | 3184  | 0.44934145  | 0.489895978 | -           | -           |
| ZNF643    | 65243    | 2041  | 0.700981468 | 0.545890947 | 0.621121297 | 0.892630949 |
| CRIM1     | 51232    | 5628  | 0.254211652 | 0.158374332 | 0.187708566 | 0.251777193 |
| PCDHGC3   | 5098     | 4726  | 0.302730253 | 0.047150378 | 0.13412067  | 0.171332089 |
| MGC12916  | 84815    | 2006  | 0.713211952 | -           | 0.210652803 | -           |
| SDS       | 10993    | 1620  | 0.883150109 | 0.96285728  | 0.391268077 | 44.48436741 |
| IL411     | 259307   | 2315  | 0.618014331 | 0.770048155 | 0.638874008 | 64.09518641 |
| DNAH17    | 8632     | 13723 | 0.104255861 | 0.38970957  | 0.107774782 | 0.678548983 |

|           |        |       |             |             |             |             |
|-----------|--------|-------|-------------|-------------|-------------|-------------|
| FAT3      | 120114 | 19048 | 0.075110415 | 0.046793928 | 0.022184456 | 0.095645725 |
| LOC10028  | 1E+08  | 2810  | 0.509147038 | 1.744597532 | 0.22557092  | 2.521355944 |
| OMG       | 4974   | 1945  | 0.735580039 | 0.572834665 | 0.977667276 | 2.497836869 |
| ZNF517    | 340385 | 2335  | 0.612720846 | 0.381726227 | 0.452429896 | 0.606853122 |
| TCAM1P    | 146771 | 3291  | 0.43473205  | 0.677097189 | 0.513606226 | 0.061509834 |
| HSPA7     | 3311   | 2493  | 0.573888157 | 1.072600167 | 1.101765703 | 14.69700128 |
| HDAC11    | 79885  | 2918  | 0.490302665 | -           | 0.434444335 | 0.277489874 |
| LOC10013  | 1E+08  | 850   | 1.683180207 | 0.786468299 | 0.99428123  | 0.238151603 |
| MS4A14    | 84689  | 3353  | 0.426693461 | -           | 0.252054592 | -           |
| RDH14     | 57665  | 1602  | 0.893073144 | 0.278193115 | 0.659440579 | 0.758160535 |
| DYDC1     | 143241 | 790   | 1.811016679 | 1.692400137 | 1.60469439  | 1.024956268 |
| C10orf68  | 79741  | 2730  | 0.524067098 | 0.652989552 | 0.386968427 | 0.148299533 |
| GAS6      | 2621   | 2523  | 0.567064279 | 1.236487351 | 0.251230394 | 0.882567377 |
| RFPL1-AS1 | 10740  | 5125  | 0.279161595 | 0.608713675 | 0.247357769 | 0.552976406 |
| DFNB31    | 25861  | 4079  | 0.350748511 | 0.218516974 | 0.310789058 | 1.290304103 |
| SLC12A5   | 57468  | 6084  | 0.235158313 | 0.219756099 | 0.208367615 | 0.099816994 |
| FGR       | 2268   | 2501  | 0.57205245  | 216.952254  | 0.760321012 | 220.8020544 |
| SLC7A7    | 9056   | 2531  | 0.565271899 | 0.352165444 | 2.003490428 | 13.1166865  |
| DKFZP434  | 26082  | 4303  | 0.332489699 | 0.362497977 | 0.392813872 | 0.235218293 |
| COPG2IT1  | 53844  | 3480  | 0.411121602 | 0.576291426 | 0.364284071 | 0.17450764  |
| KCNAB1    | 7881   | 4518  | 0.31666737  | 0.24660545  | 0.280590653 | 0.044804972 |
| AMPH      | 273    | 3426  | 0.417601628 | 0.845541419 | 0.431696827 | 0.354516397 |
| CRTAM     | 56253  | 2422  | 0.590711468 | 0.552021515 | 0.087235657 | 0.25073765  |
| FLJ20021  | 90024  | 810   | 1.766300218 | 0.55020416  | 4.956062304 | 1.249560882 |
| SPRY3     | 10251  | 9038  | 0.158298648 | 0.172585616 | 0.140264281 | 0.3135654   |
| SLC25A45  | 283130 | 2286  | 0.625854408 | 3.216744793 | 1.386382949 | 2.302340524 |
| CHST2     | 9435   | 3046  | 0.469699007 | 0.219467516 | 0.554917298 | 0.797487313 |
| HRH4      | 59340  | 3686  | 0.388145192 | 0.725445528 | 0.573208794 | 0.65901963  |
| CA13      | 377677 | 3855  | 0.371129229 | 0.231214199 | 0.274039898 | 0.630128756 |
| LILRA1    | 11024  | 1910  | 0.749059255 | 3.499989813 | 0.774342057 | 1.907706562 |
| RBPMS     | 11030  | 3154  | 0.453615465 | 0.423904917 | 0.200968384 | 1.219450982 |
| HCG27     | 253018 | 1742  | 0.821299183 | 1.151259565 | 0.606443058 | 1.27825344  |
| CCDC135   | 84229  | 2926  | 0.488962125 | 0.456936469 | 0.722094195 | 0.691827966 |
| LOC10013  | 1E+08  | 1391  | 1.028542902 | 0.480588105 | 0.455682447 | 0.291055159 |
| ZNF844    | 284391 | 2834  | 0.432715952 | 0.550398304 | 0.447321301 | 0.571429394 |
| SLC14A1   | 6563   | 4226  | 0.290183864 | 0.158186951 | 0.099992788 | 0.191603278 |
| PTPRVP    | 148713 | 4095  | 0.299466913 | 0.707405348 | 0.257978952 | 0.4448986   |
| EGLN2     | 112398 | 2174  | 0.56408326  | 0.61499361  | -           | 0.186227105 |
| PTK6      | 5753   | 2519  | 0.486826919 | 0.619225404 | 0.503258661 | 0.883968834 |
| SULT1C2P  | 151234 | 1875  | 0.654035738 | 0.356532296 | -           | 0.21592412  |
| INTS4L1   | 285905 | 2552  | 0.480531743 | 0.349267531 | 0.496751006 | 0.317286619 |
| MAGEB10   | 139422 | 1953  | 0.627914495 | 0.228195274 | 0.64910833  | -           |
| SH3D21    | 79729  | 2527  | 0.485285718 | 1.058168665 | 1.254163601 | 0.881170357 |
| NXNL2     | 158046 | 1476  | 0.830838081 | 0.905823922 | 0.429440572 | 1.234322335 |
| PHOSPHO   | 493911 | 1268  | 0.967126978 | 1.230148891 | 0.999770164 | 0.159644214 |
| ESPNL     | 339768 | 4683  | 0.261865686 | 0.095166639 | 0.541408741 | 0.172905285 |
| IRF8      | 3394   | 2678  | 0.457922707 | 0.416043101 | 0.631171804 | 2.19209747  |
| IL11      | 3589   | 2354  | 0.520950301 | 0.28398388  | 0.179511267 | 0.343974279 |
| TNFSF15   | 9966   | 6705  | 0.1828959   | 3.323380831 | 0.630230459 | 3.139836204 |
| BEGAIN    | 57596  | 2763  | 0.443835327 | 1.854922819 | 0.994101302 | 1.025698184 |
| PRRT3     | 285368 | 3761  | 0.326061422 | 0.592482544 | 0.505600333 | 1.184109275 |
| ZNF204P   | 7754   | 4029  | 0.304372551 | 0.331843164 | 0.052440993 | 0.100485909 |
| LOC10027  | 1E+08  | 2034  | 0.60290905  | 0.328661777 | 0.207752961 | 0.796180385 |
| PRSS16    | 10279  | 2881  | 0.425656719 | 1.314875266 | 0.733373    | 1.053951039 |
| KCNJ11    | 3767   | 3418  | 0.358782039 | 0.847520451 | 0.803599151 | 0.533019241 |
| TP73      | 7161   | 5154  | 0.237935004 | -           | 0.491931924 | -           |
| RPL13P5   | 283345 | 634   | 1.934253956 | 3.514711116 | 1.333026886 | 4.150749556 |
| LINC00471 | 151477 | 1298  | 0.944774274 | 0.686695485 | 0.325554332 | 0.623817759 |
| ZNF93     | 81931  | 2794  | 0.438910883 | 1.036802041 | 0.453725329 | 0.289805101 |
| LOC10012  | 1E+08  | 3538  | 0.346613061 | 1.133688051 | 0.1194374   | 1.258743636 |
| LHFPL2    | 10184  | 5061  | 0.242307253 | 0.264176271 | 0.584466836 | 4.799735933 |
| LOC44002  | 440028 | 2311  | 0.530643448 | 0.385690497 | 0.457128432 | 0.350374492 |

|           |          |       |             |             |             |             |
|-----------|----------|-------|-------------|-------------|-------------|-------------|
| SYNPO2L   | 79933    | 4933  | 0.248594569 | 0.090343679 | 0.342647089 | 0.164142601 |
| C8orf45   | 157777   | 5114  | 0.239796052 | 0.348584567 | 0.165259884 | 0.277082918 |
| ZNF625    | 90589    | 1711  | 0.716725312 | 0.260470701 | 0.123486126 | 0.118310265 |
| C17orf67  | 339210   | 829   | 1.479272628 | 1.34398483  | 1.784069155 | 2.686028338 |
| PMS2P4    | 5382     | 597   | 2.054132342 | 1.119762235 | 2.123464938 | 1.017230467 |
| C3orf14   | 57415    | 832   | 1.473938712 | 2.410449715 | 0.761844091 | 0.973215687 |
| ZNF224    | 7767     | 2483  | 0.493885223 | 0.897433285 | 1.106202939 | 1.548992508 |
| CCDC65    | 85478    | 1832  | 0.669387013 | 1.094702054 | 1.153301099 | 0.552480521 |
| LOC100134 | 1E+08    | 2398  | 0.51139158  | 0.464621945 | 0.440543706 | 0.84415706  |
| LRIG1     | 26018    | 4812  | 0.254845596 | 0.27784624  | 0.175631556 | 0.126202533 |
| DPEP2     | 64174    | 1724  | 0.71132077  | 1.163279677 | 0.980439728 | 3.052871483 |
| SEMA6C    | 10500    | 4024  | 0.304750748 | -           | 0.210024614 | 0.201221534 |
| NUDT17    | 200035   | 1093  | 1.121973475 | 1.630980309 | 0.966535962 | 0.926024076 |
| ANKRD19P  | 138649   | 2307  | 0.531563506 | 0.869308263 | 1.373763078 | -           |
| DGCR5     | 26220    | 5427  | 0.225965913 | 0.20530006  | 0.077864294 | 0.223801949 |
| GPM6B     | 2824     | 3219  | 0.380962103 | 0.830690344 | 0.853278005 | 1.006170179 |
| DBIL5P2   | 1E+08    | 1692  | 0.724773646 | 0.658489021 | 0.374618371 | 0.478555232 |
| BEST1     | 7439     | 2852  | 0.429984926 | 0.546924542 | 0.296332064 | 4.187693869 |
| FLG2      | 388698   | 9170  | 0.133731408 | 0.072900551 | 0.069122605 | 0.022075121 |
| COX16     | 51241    | 1724  | 0.71132077  | 0.129253297 | 1.593214558 | 0.117418134 |
| PGAM2     | 5224     | 888   | 1.380987622 | 2.50937708  | 2.855199478 | 4.559208625 |
| ZNF300    | 91975    | 3337  | 0.367490863 | 0.534210811 | 0.696473592 | 0.121323862 |
| PTCH2     | 8643     | 4298  | 0.28532271  | 0.207382675 | 0.147476567 | 0.423885474 |
| AASS      | 10157    | 5887  | 0.208309327 | 0.075703307 | 0.28712045  | 0.34385742  |
| CUBN      | 8029     | 11933 | 0.102766866 | 0.11204191  | 0.106235529 | 0.084818932 |
| GLIS3     | 169792   | 7656  | 0.160177248 | 0.174633765 | 0.055194556 | 0.766775996 |
| SLC11A1   | 6556     | 3865  | 0.317287712 | 0.115307987 | 0.491995563 | 4.294739136 |
| ATP1B2    | 482      | 3350  | 0.366064779 | 0.465620535 | 1.009121248 | 0.604265263 |
| RAB43     | 339122   | 4592  | 0.267055098 | 0.339683971 | 0.322080429 | 1.542902919 |
| CLEC3B    | 7123     | 886   | 1.384104975 | 0.251504159 | 1.669292697 | 0.685425044 |
| C5orf63   | 401207   | 5680  | 0.215900882 | 0.117693319 | 0.111594064 | 0.035638884 |
| LOC728392 | 728392   | 1503  | 0.815912846 | -           | 0.421726071 | 0.404049627 |
| CSPG5     | 10675    | 2334  | 0.525414314 | 0.190944888 | 0.995772226 | 0.086730447 |
| LOC730668 | 730668   | 4162  | 0.294646086 | 0.053539809 | 0.1015304   | 0.097274802 |
| NPHP3-AC  | 1.01E+08 | 7788  | 0.157462379 | 0.143061559 | 0.135647638 | 0.103969627 |
| OR7E37P   | 1.01E+08 | 1203  | 1.019382384 | 0.740923308 | 1.053789333 | 1.346160352 |
| ITPK1-AS1 | 319085   | 4701  | 0.26086301  | 0.142203373 | 0.044944642 | 0.215304045 |
| LOC100129 | 1E+08    | 2065  | 0.593858115 | 0.215818581 | 0.409268303 | 0.19605701  |
| ACVR1     | 90       | 3062  | 0.400495431 | 0.436641446 | 0.414013249 | 2.776620589 |
| LOC387640 | 387646   | 6454  | 0.190008833 | 0.103578874 | 0.130948101 | 0.125459475 |
| ECT2L     | 345930   | 4483  | 0.273548295 | 0.198824613 | 0.235651083 | 0.225773882 |
| AKR7A2P1  | 246182   | 1324  | 0.926221305 | 0.336605264 | 0.159580635 | 0.15289189  |
| FABP3     | 2170     | 1097  | 1.117882414 | 1.015645783 | 0.77040934  | 0.369059003 |
| HDAC9     | 9734     | 4659  | 0.26321464  | -           | 0.136049428 | 0.130346982 |
| C1orf229  | 388759   | 2258  | 0.543098764 | 0.592115194 | 0.561429835 | 1.075795552 |
| GPR137B   | 7107     | 2046  | 0.599372927 | 1.633670709 | 1.549008514 | 3.85861469  |
| DGCR11    | 25786    | 2214  | 0.553892054 | 0.40258841  | 0.763449906 | 0.731450273 |
| FLJ30403  | 729975   | 1701  | 0.720938864 | 1.048007924 | 0.869484615 | 1.071052185 |
| HOXC11    | 3227     | 2100  | 0.58396048  | 0.318332407 | -           | 1.15673636  |
| HIST1H1E  | 3008     | 785   | 1.562187272 | 0.567726585 | 1.345762811 | 0.773613489 |
| DSC3      | 1825     | 6978  | 0.175740471 | 0.351269638 | 0.272508291 | 0.377124566 |
| PADI4     | 23569    | 2265  | 0.541420313 | 50.46938952 | 2.238778928 | 201.7138824 |
| ZNF423    | 23090    | 4846  | 0.253057575 | 0.045982807 | 0.087199654 | -           |
| C20orf118 | 140711   | 2041  | 0.600841258 | 2.947811116 | 0.414080865 | 11.20747747 |
| ACSM4     | 341392   | 1743  | 0.703566844 | 0.25568868  | 0.969752204 | 0.92910551  |
| GPR65     | 8477     | 4522  | 0.271189077 | 0.295664774 | 0.186894968 | 0.761010763 |
| STC1      | 6781     | 3897  | 0.314682322 | 3.25929254  | 0.162651856 | 4.986700242 |
| TAT       | 6898     | 2757  | 0.444801236 | 0.565770328 | 0.536450246 | 0.440541595 |
| LOC642820 | 642826   | 810   | 1.513971615 | -           | 0.521690769 | -           |
| SPOCK1    | 6695     | 4841  | 0.253318944 | 0.230151503 | 0.043644859 | 0.167262023 |
| LOC285033 | 285033   | 537   | 2.283644336 | 2.904709112 | 2.754177522 | 0.753925002 |
| FLT4      | 2324     | 5857  | 0.209376303 | 0.57068299  | -           | 0.449304289 |

|           |        |      |             |             |             |             |
|-----------|--------|------|-------------|-------------|-------------|-------------|
| POLR2J3   | 548644 | 1680 | 0.7299506   | 0.397915508 | 0.880353172 | 0.843453596 |
| MST1P9    | 11223  | 4396 | 0.278962013 | 0.152069621 | 0.38450366  | 0.276290532 |
| CEL       | 1056   | 2384 | 0.514394718 | 0.560820515 | 0.354504633 | 0.084911436 |
| SLC44A4   | 80736  | 2646 | 0.463460699 | 0.33685969  | 0.239551884 | 0.229511182 |
| ST3GAL5   | 8869   | 2397 | 0.511604926 | 1.301484183 | 2.379928476 | 11.40087463 |
| CITED1    | 4435   | 1251 | 0.980269391 | 0.178123649 | 0.67557078  | -           |
| ADORA2B   | 136    | 1885 | 0.650566052 | 0.354640878 | 0.784611846 | 0.966503855 |
| DKFZP6861 | 401232 | 2826 | 0.433940909 | 0.473105488 | 0.149529201 | 0.429785272 |
| SYT2      | 127833 | 7614 | 0.16106081  | 0.058532357 | 0.166497054 | 0.026586402 |
| SULT1C2   | 6819   | 2832 | 0.433021542 | 0.786838576 | 0.447637206 | 0.500353828 |
| RPH3AL    | 9501   | 2754 | 0.445285769 | 0.647299012 | 0.306876923 | 0.514525069 |
| CTSE      | 1510   | 2322 | 0.528129633 | -           | 0.45496288  | -           |
| LOC158696 | 158696 | 2908 | 0.421704611 | 0.383137353 | 0.435938297 | 0.417666155 |
| PMS2L2    | 5380   | 761  | 1.611454676 | 4.685049876 | 2.498768531 | 3.990056431 |
| CSGALNAC  | 55790  | 4299 | 0.285256341 | 0.46650248  | 0.245737103 | 0.141262291 |
| MSH5      | 4439   | 2945 | 0.416406454 | 0.52965324  | 0.286974209 | 0.274945824 |
| TMPRSS5   | 80975  | 2233 | 0.549179135 | 0.399162893 | 0.473096197 | 0.453266599 |
| KLHDC1    | 122773 | 2702 | 0.453855295 | 0.742225819 | 0.469174156 | 0.599345264 |
| TIE1      | 7075   | 3960 | 0.309676012 | 0.39389616  | 1.920770558 | 0.255591999 |
| BDNF-AS1  | 497258 | 2322 | 0.528129633 | 0.863692577 | 0.545955456 | 0.348714665 |
| SEPT10    | 151011 | 3269 | 0.375135212 | 0.477157783 | 0.710961265 | 0.990780608 |
| TTC3P1    | 286495 | 2542 | 0.482422112 | 0.525962277 | 0.24935259  | 0.557435893 |
| GPR113    | 165082 | 4411 | 0.278013378 | 0.505174982 | 0.383196121 | 0.826052943 |
| SEMA4F    | 10505  | 4292 | 0.285721577 | 0.051918146 | 0.098455154 | 0.33014959  |
| GLS2      | 27165  | 2636 | 0.465218895 | 0.507206414 | 0.320614205 | 0.614351633 |
| SPAG17    | 200162 | 7125 | 0.172114668 | -           | 0.029654002 | -           |
| LOC100123 | 1E+08  | 1194 | 1.027066171 | 0.373254078 | 1.592598704 | 0.169538411 |
| PAQR5     | 54852  | 5480 | 0.223780476 | 0.243977392 | 0.308444907 | 0.369395735 |
| NAP1L6    | 645996 | 2044 | 0.599959397 | 0.654107685 | 0.103368279 | 0.594213883 |
| LOC100123 | 1E+08  | 2743 | 0.447071458 | 0.649894815 | 0.924322689 | 0.442790076 |
| RASIP1    | 54922  | 3311 | 0.370376626 | 0.06730072  | 0.446690827 | 0.122276571 |
| TRIM78P   | 117852 | 1277 | 0.960310891 | 1.395976099 | 0.992724016 | 6.340763131 |
| AGSK1     | 80154  | 2561 | 0.478843033 | -           | 0.165001766 | 0.079042898 |
| FAM20C    | 56975  | 2768 | 0.443033601 | 19.7232687  | 0.686980799 | 49.36397489 |
| C12orf23  | 90488  | 3386 | 0.362172773 | 0.065810007 | 0.31199758  | 0.298920353 |
| HSP90AA6  | 441051 | 306  | 4.007571922 | 2.184634164 | 2.761892305 | 0.661532232 |
| CXCL12    | 6387   | 3545 | 0.345928634 | 0.062858303 | -           | -           |
| C1orf127  | 148345 | 2779 | 0.44127996  | 0.481106912 | 0.152058123 | 0.3642117   |
| ACAD11    | 84129  | 3556 | 0.344858551 | 0.250655438 | 0.118832824 | 0.341556012 |
| SLC12A8   | 84561  | 3510 | 0.349378065 | 0.634850954 | 0.300975444 | 0.461376326 |
| COL5A2    | 1290   | 6930 | 0.176957721 | 0.064309577 | 0.121953686 | 0.029210514 |
| LOC219347 | 219347 | 4059 | 0.302122939 | 0.274492097 | 0.260267013 | 0.099743219 |
| LOC100495 | 1E+08  | 2469 | 0.496685706 | 0.361008805 | 0.085575035 | 0.163976398 |
| C18orf26  | 284254 | 2027 | 0.604991124 | 0.769525798 | 0.312705616 | 0.798929898 |
| ALOX12    | 239    | 2358 | 0.520066585 | 1.417510717 | 0.268810129 | 0.686781554 |
| ASB14     | 142686 | 3175 | 0.386241577 | 1.193119887 | 1.73020592  | 1.402656688 |
| PCDHGA5   | 56110  | 4602 | 0.266474795 | 0.048420835 | 0.091823017 | 0.04398715  |
| LOC401127 | 401127 | 1651 | 0.742772264 | -           | 0.383921432 | -           |
| PLEKHG6   | 55200  | 3149 | 0.389430616 | 0.070762999 | 0.134191655 | 0.707118924 |
| C9orf7    | 11094  | 2891 | 0.424184368 | 0.231234194 | 0.365418128 | 0.840244329 |
| PIH1D2    | 120379 | 1263 | 0.970955668 | 1.058587576 | 0.836440069 | 1.121933524 |
| MAP2K6    | 5608   | 1879 | 0.652643432 | 0.592955521 | 0.899562582 | 0.430928926 |
| APLNR     | 187    | 3905 | 0.314037646 | -           | 0.054106213 | -           |
| TMPRSS11  | 9407   | 2800 | 0.43797036  | 0.159166203 | 0.301835373 | 0.072296022 |
| B3GNT7    | 93010  | 3641 | 0.336807747 | 0.122401914 | 0.29014661  | 0.055597051 |
| LYPD6B    | 130576 | 1600 | 0.76644813  | -           | -           | -           |
| MYEF2     | 50804  | 5403 | 0.226969648 | 0.329939196 | 0.351945744 | 0.449592144 |
| SEPT11    | 55752  | 5582 | 0.219691331 | 0.439118512 | 0.378510859 | 0.616497791 |
| EXOC3L2   | 90332  | 1719 | 0.713389766 | 0.907404766 | 0.983291501 | 0.588798322 |
| DLX2      | 1746   | 2308 | 0.531333192 | 0.675835699 | 0.91544524  | 0.964782276 |
| MGC14436  | 84983  | 1178 | 1.041016136 | -           | 0.179358881 | 0.17184114  |
| C6orf226  | 441150 | 572  | 2.143910854 | 1.168702892 | 1.10813686  | 1.769483068 |

|          |          |      |             |   |             |             |             |
|----------|----------|------|-------------|---|-------------|-------------|-------------|
| NR112    | 8856     | 4446 | 0.275824788 | - |             | 0.047522438 | 0.136591675 |
| GNMT     | 27232    | 1091 | 1.124030255 |   | 1.838216464 | 0.580984678 | 0.927721645 |
| LOC10013 | 1E+08    | 2347 | 0.522504051 |   | 0.569661742 | 0.630163327 | 0.345000193 |
| CLDND2   | 125875   | 990  | 1.238704049 |   | 1.35050112  | -           | 0.408947198 |
| LOC10050 | 1.01E+08 | 1476 | 0.830838081 |   | 1.056794575 | 0.715734286 | 1.508616187 |
| AGBL3    | 340351   | 3542 | 0.346221629 |   | 0.062911543 | 0.298256298 | 0.228604024 |
| CCBE1    | 147372   | 6276 | 0.195397866 |   | 0.390560792 | 0.336655133 | 0.193526638 |
| LRGUK    | 136332   | 2700 | 0.454191485 |   | 0.165061248 | 0.313014461 | 0.299894612 |
| KL       | 9365     | 5012 | 0.244676179 | - |             | 0.126467335 | 0.040388839 |
| ZNF487P  | 642819   | 1491 | 0.822479549 |   | 0.896711005 | 0.70853374  | 1.221904605 |
| C3orf71  | 646450   | 1598 | 0.767407389 |   | 0.557778936 | 0.396654746 | 0.633381924 |
| C1orf53  | 388722   | 697  | 1.75942182  |   | 2.237917924 | 2.425076171 | 0.871286354 |
| MYCBP    | 26292    | 2583 | 0.474764618 |   | 0.603882614 | 0.163596408 | 0.39184836  |
| KLHL30   | 377007   | 3685 | 0.332786162 |   | 0.181410598 | 0.344018607 | 0.274666028 |
| IKZF3    | 22806    | 2437 | 0.503207636 |   | 0.365749175 | 0.693589697 | 0.33225911  |
| RHOV     | 171177   | 1726 | 0.710496529 | - |             | 0.244825911 | -           |
| DISC1    | 27185    | 2832 | 0.433021542 | - |             | -           | -           |
| EPAS1    | 2034     | 5184 | 0.236558065 |   | 2.106250299 | 0.733627644 | 21.35968133 |
| CELF6    | 60677    | 3418 | 0.358782039 |   | 0.717132689 | 0.494522554 | 2.901993647 |
| SLC35E4  | 339665   | 2542 | 0.482422112 |   | 0.08766038  | 0.41558765  | 0.79633699  |
| LY86-AS1 | 285780   | 2037 | 0.602021114 |   | 0.765748058 | 0.207446992 | 0.795007807 |
| FUCA1    | 2517     | 2133 | 0.57492593  |   | 0.208938289 | 0.990552093 | 0.949033582 |
| LOC10028 | 1E+08    | 1698 | 0.722212608 |   | 1.837254173 | 0.497726175 | 1.072944503 |
| HS3ST3B1 | 9953     | 2032 | 0.603502465 |   | 0.438647017 | 0.623872327 | 0.398482014 |
| TSPAN33  | 340348   | 2900 | 0.422867934 |   | 0.23051657  | 0.5099977   | 0.349015281 |
| MDP1     | 145553   | 808  | 1.51771907  |   | 0.275783026 | 0.784473124 | 1.503184626 |
| SH2D2A   | 9047     | 1691 | 0.725202252 |   | 0.922429801 | 0.999573087 | 8.379669076 |
| MAB21L3  | 126868   | 3229 | 0.379782288 |   | 0.138019625 | 0.196300491 | 0.250763534 |
| PHKG1    | 5260     | 1431 | 0.856965065 |   | 1.090027109 | 0.738241654 | 0.707298613 |
| SAMD5    | 389432   | 6324 | 0.19391477  |   | 0.246652244 | 0.13363995  | 0.256076993 |
| SH2D3A   | 10045    | 2376 | 0.516126687 |   | 0.5627088   | -           | 1.363157326 |
| PDE7B    | 27115    | 5387 | 0.227643774 |   | 0.330919153 | 0.235327375 | 0.03757729  |
| SLC2A11  | 66035    | 2403 | 0.510327511 |   | 0.463655191 | 0.08792541  | 0.336960238 |
| PCA3     | 50652    | 3735 | 0.328331194 |   | 0.238642768 | 0.169706636 | 0.162593464 |
| FCGR1B   | 2210     | 1139 | 1.076661113 |   | 0.978194402 | 2.226002754 | 3.19905139  |
| UCN2     | 90226    | 1546 | 0.793219281 |   | 0.432404951 | 1.776650645 | 0.392811506 |
| ATP9A    | 10079    | 7580 | 0.161783246 |   | 1.734449657 | 0.139369895 | 4.780312199 |
| KIAA1875 | 340390   | 7119 | 0.172259729 |   | 0.438215703 | 0.207752961 | 0.142175069 |
| MLK7-AS1 | 339751   | 2551 | 0.480720113 |   | 0.262053334 | 0.248472867 | 0.079352749 |
| ABHD12B  | 145447   | 1708 | 0.717984197 |   | 0.130464101 | 0.865921153 | 1.540734905 |
| LOC28329 | 283299   | 2503 | 0.489938877 |   | 0.801236182 | 0.337650438 | 0.485246975 |
| CPAMD8   | 27151    | 5996 | 0.204522516 |   | 0.148654226 | 0.211425712 | 0.405127811 |
| C18orf1  | 753      | 8946 | 0.137079925 |   | 0.224177751 | 0.212560122 | 0.316790083 |
| EPN2     | 22905    | 4835 | 0.253633301 |   | 0.875661016 | 0.742883339 | 1.800298057 |
| CMBL     | 134147   | 4047 | 0.303018781 |   | 0.605673223 | 0.417661994 | 0.400155894 |
| SDHAP3   | 728609   | 1153 | 1.063588038 |   | 0.193263387 | 1.465982733 | 0.526701291 |
| AP3S2    | 10239    | 6053 | 0.202596565 |   | 0.220881564 | 0.453775301 | 0.401312796 |
| METTL20  | 254013   | 2183 | 0.561757677 |   | 1.020763558 | 0.580718538 | 1.761863672 |
| MTMR9LP  | 339483   | 2341 | 0.523843233 |   | 0.380747859 | 0.631778441 | 0.432355538 |
| TMEM130  | 222865   | 3065 | 0.400103428 |   | 0.218107032 | 0.344673346 | 0.528362448 |
| LOC28554 | 285540   | 1133 | 1.082362761 |   | 1.573399363 | 1.491860627 | 1.786662515 |
| LOC10030 | 1E+08    | 570  | 2.151433348 |   | 1.172803604 | 3.706750199 | 1.065415068 |
| FLJ44635 | 392490   | 2269 | 0.540465848 |   | 0.196414883 | 0.838062077 | 0.178430025 |
| DIRC2    | 84925    | 3348 | 0.366283455 |   | 0.599012593 | 1.388370594 | 2.478967557 |
| MSTO2P   | 1E+08    | 2559 | 0.479217276 |   | 0.435390162 | 0.743088258 | 0.15820935  |
| FBXO40   | 51725    | 5722 | 0.21431615  |   | 0.038943147 | 0.221549907 | 0.247641042 |
| SLC15A1  | 6564     | 3142 | 0.325248517 |   | 0.212761952 | 0.537962473 | 0.450987282 |
| GRAMD1C  | 54762    | 3770 | 0.271069188 |   | 0.059106813 | 0.448349626 | 0.322167952 |
| AICDA    | 57379    | 2794 | 0.36575907  |   | 0.319016013 | 0.226862664 | 0.14490255  |
| TMC7     | 79905    | 4524 | 0.22589099  |   | 0.344789742 | 0.23351543  | 0.313218842 |
| CN5H6.4  | 150384   | 1532 | 0.667056684 | - |             | 0.137914335 | -           |
| PCDHB3   | 56132    | 3173 | 0.32207086  |   | 0.280911043 | 0.199764981 | 0.127594619 |

|           |        |      |             |             |             |             |
|-----------|--------|------|-------------|-------------|-------------|-------------|
| KCNA7     | 3743   | 4372 | 0.233744474 | 0.203872539 | 0.144980394 | 0.324108427 |
| AGAP1     | 116987 | 4530 | 0.225591797 | 0.147571314 | 0.699618415 | 0.178745133 |
| DHRS2     | 10202  | 1709 | 0.597970064 | -           | 0.494522554 | 0.710692322 |
| SUSD5     | 26032  | 5005 | 0.204181986 | 0.133566045 | 0.084429475 | 0.121335982 |
| FAM74A2   | 653114 | 1790 | 0.570911084 | 0.871412734 | 0.354108539 | 0.339266251 |
| NODAL     | 4838   | 2086 | 0.489899732 | 0.213645911 | 0.709009266 | 0.291124923 |
| NEURL1B   | 54492  | 6417 | 0.159253676 | 0.069450735 | 0.164628924 | -           |
| C1orf210  | 149466 | 1495 | 0.683565779 | 0.745259815 | 0.282655199 | 0.677019609 |
| ESRRB     | 2103   | 3029 | 0.337382252 | 0.220699259 | 0.558031724 | 0.467811833 |
| RHPN1     | 114822 | 3795 | 0.269283489 | 1.70280576  | 0.055674509 | 0.906795961 |
| LOC100133 | 1E+08  | 2305 | 0.443353944 | 0.386694464 | 0.274991013 | 0.70257306  |
| TF        | 7018   | 2808 | 0.363935484 | 0.238069108 | 0.225731583 | 0.576720407 |
| AGAP7     | 653268 | 2420 | 0.422285471 | 0.368318487 | 0.523846516 | 0.501889743 |
| DISC2     | 27184  | 3892 | 0.262572158 | 0.28627015  | 0.217147751 | 0.208046108 |
| SEMG1     | 6406   | 1663 | 0.614510427 | -           | -           | 0.121725113 |
| S100A9    | 6280   | 586  | 1.743909284 | 234.2405014 | 28.48378182 | 938.565223  |
| ATP1B4    | 23439  | 4773 | 0.214106608 | 0.280116511 | 0.221333293 | 0.212056215 |
| GPR35     | 2859   | 2293 | 0.445674156 | 19.92180566 | 1.935010898 | 35.13592999 |
| GARNL3    | 84253  | 3752 | 0.272369627 | 0.059390374 | 0.281562848 | -           |
| CCDC148   | 130940 | 2846 | 0.359076191 | 0.391483986 | -           | 0.426764996 |
| TMC5      | 79838  | 4917 | 0.20783625  | 0.407869466 | 0.429702586 | 0.205845905 |
| CCDC68    | 80323  | 4136 | 0.247081925 | 0.053876374 | 0.051084323 | 0.097886297 |
| AOX1      | 316    | 4949 | 0.20649239  | 0.0450258   | 0.213462075 | 0.122708949 |
| WNT8B     | 7479   | 1996 | 0.511989399 | 0.781477351 | 0.529270444 | 0.709920862 |
| L1TD1     | 54596  | 4005 | 0.255163755 | 0.723302098 | 0.158265739 | 0.050544036 |
| PLA2G10   | 8399   | 1020 | 1.001892981 | 0.218463416 | 1.242851537 | -           |
| C1orf226  | 400793 | 4146 | 0.246485972 | 0.376224986 | 0.152883329 | 0.390600797 |
| SHOX2     | 6474   | 3233 | 0.316093672 | 1.998808493 | 0.718877938 | 2.880212711 |
| ARHGEF4   | 50649  | 4258 | 0.240002546 | 0.052332711 | 0.099241316 | -           |
| TPI1P2    | 286016 | 2017 | 0.50665882  | 0.773340998 | 0.314255966 | 0.60216816  |
| GPLD1     | 2822   | 3489 | 0.292900785 | -           | 0.242229592 | 0.058019164 |
| CA11      | 770    | 1686 | 0.606127426 | 0.396499439 | 0.250634355 | 0.360193706 |
| UFSP1     | 402682 | 1016 | 1.005837441 | 0.657970526 | 1.663659538 | 0.398482014 |
| PDGFRB    | 5159   | 5718 | 0.178721728 | 0.389703891 | 0.369508152 | 0.354020397 |
| HEYL      | 26508  | 4131 | 0.247380983 | -           | 0.153438461 | 0.098004775 |
| SLC28A2   | 9153   | 2463 | 0.414913049 | 0.09047206  | 0.343134001 | 0.410939632 |
| ABCA10    | 10349  | 6348 | 0.160984694 | 0.14041127  | 0.332836738 | 0.223220233 |
| ITIH4     | 3700   | 3283 | 0.311279574 | 0.407248282 | 0.25742889  | 0.986555531 |
| TPTE2P1   | 646405 | 6477 | 0.157778422 | 0.13761475  | 0.260966202 | 0.375041895 |
| ENPP3     | 5169   | 3180 | 0.321361899 | 0.140146343 | 0.199325247 | -           |
| RILP      | 83547  | 1807 | 0.565540033 | 4.439389403 | 1.520034254 | 13.77905376 |
| AGMO      | 392636 | 2475 | 0.41290135  | 0.270100224 | 0.256102741 | 0.327157758 |
| PANX2     | 56666  | 3069 | 0.332984959 | 0.145215174 | 0.344224114 | 0.395755353 |
| RPL23P8   | 222901 | 523  | 1.953978662 | 0.852132638 | 0.807972319 | 0.387053275 |
| DLG2      | 1740   | 8061 | 0.126774698 | 0.110573222 | 0.131053691 | -           |
| C3orf35   | 339883 | 1807 | 0.565540033 | -           | -           | 0.112024827 |
| ACCN3     | 9311   | 2088 | 0.489430479 | -           | 0.404760079 | 0.096948689 |
| DNMBP-AS1 | 1E+08  | 2651 | 0.385488812 | 0.336224345 | 0.239100069 | 0.229078306 |
| ZNF154    | 7710   | 2760 | 0.370264797 | 0.64589184  | 0.1531049   | 0.146687582 |
| PPP4R4    | 57718  | 3868 | 0.264201355 | 0.230437109 | 0.10924755  | 0.157002738 |
| LGSN      | 51557  | 5634 | 0.181386376 | 0.158205669 | 0.15000693  | 0.107789597 |
| PPIL6     | 285755 | 4223 | 0.241991674 | 0.633197304 | 0.750478669 | 0.47934848  |
| EML5      | 161436 | 7171 | 0.142508833 | 0.124296575 | 0.117855117 | -           |
| FLJ39653  | 202020 | 2547 | 0.401229227 | 1.924742467 | 0.6636349   | 0.476864224 |
| LDB3      | 11155  | 5436 | 0.187993164 | 0.286944222 | 0.116603069 | 0.186192847 |
| KLC3      | 147700 | 1793 | 0.569955851 | 0.372837732 | 0.707032107 | -           |
| C1orf140  | 400804 | 4492 | 0.227500187 | 0.198426255 | 0.235178942 | 0.22532153  |
| IL1A      | 3552   | 2943 | 0.347241196 | 4.694402465 | 0.933299999 | 19.32807016 |
| POU2AF1   | 5450   | 3032 | 0.33704843  | 0.587949036 | 0.627164529 | 0.867933779 |
| CD24      | 1E+08  | 2194 | 0.465784339 | 0.507822891 | 0.096301167 | 0.461323753 |
| TMIGD2    | 126259 | 1282 | 0.797137941 | 0.347632894 | 0.988852237 | 0.631603317 |
| ELOVL7    | 79993  | 3902 | 0.261899241 | 0.2855365   | 0.216591247 | 0.259391162 |

|           |          |       |             |             |             |             |
|-----------|----------|-------|-------------|-------------|-------------|-------------|
| DCX       | 1641     | 9433  | 0.108335719 | 0.11811337  | 0.089593877 | 0.064378945 |
| MCF2      | 4168     | 3867  | 0.264269677 | 0.2304967   | 0.109275801 | 0.471130015 |
| FAM108C1  | 58489    | 2408  | 0.424389884 | 0.277615471 | 0.087742841 | 0.420325712 |
| HNF1A     | 6927     | 3241  | 0.315313434 | 0.343771498 | 0.260764901 | 0.062458767 |
| IFT43     | 112752   | 865   | 1.181422937 | 0.77283012  | 0.732779519 | 0.936087228 |
| STX16-NPE | 1.01E+08 | 4048  | 0.252453271 | 0.550476    | 0.260974261 | 0.900128343 |
| LOC284440 | 284440   | 2385  | 0.428482533 | 0.747447161 | 0.177177997 | 0.509255001 |
| LOC144480 | 144486   | 2568  | 0.397948147 | 0.173545705 | 0.411379987 | 0.078827439 |
| MAP2      | 4133     | 9445  | 0.108198077 | 0.023592661 | 0.044740024 | -           |
| PATE2     | 399967   | 1640  | 0.623128561 | 1.222862294 | 0.515328686 | 0.987457868 |
| TTC32     | 130502   | 838   | 1.219487876 | 1.329550625 | 1.512778721 | 1.449371334 |
| LOC644240 | 644246   | 538   | 1.899499703 | 2.485122878 | 1.963613024 | 2.257570962 |
| GPR77     | 27202    | 1287  | 0.794041057 | 2.597117538 | 7.715915916 | 11.95384117 |
| NOTCH3    | 4854     | 8089  | 0.126335868 | 0.137738092 | 0.13060005  | 0.425428442 |
| CADM4     | 199731   | 2176  | 0.469637335 | 0.102404726 | 0.388391105 | 0.18605594  |
| PCDH11X   | 27328    | 4767  | 0.214376094 | 0.373958774 | 0.310256625 | 0.127393872 |
| PRDM11    | 56981    | 2229  | 0.458470543 | 0.499849001 | 0.663523252 | 0.454079998 |
| FOXP3     | 50943    | 2397  | 0.426337439 | 0.278889468 | 0.088145499 | 0.25335277  |
| MYLK4     | 340156   | 5760  | 0.177418549 | 0.23211738  | 0.220088293 | 0.562302397 |
| SCN2B     | 6327     | 4922  | 0.20762512  | 0.316909548 | 0.128779822 | 0.082254719 |
| DKFZp6860 | 401014   | 4760  | 0.214691353 | 0.046813589 | 0.08877511  | 0.042527072 |
| PKP2      | 5318     | 4439  | 0.230216454 | 0.150596543 | 0.190389512 | 0.228011785 |
| LOC283143 | 283143   | 2256  | 0.452983528 | 0.296320059 | -           | -           |
| RAB17     | 64284    | 2018  | 0.50640775  | -           | -           | -           |
| PLEKHG4B  | 153478   | 11529 | 0.088640024 | 0.07731206  | 0.054979121 | 0.105349395 |
| TMOD4     | 29765    | 1322  | 0.77301879  | 1.517015252 | 0.479466176 | 0.459369583 |
| CYP27C1   | 339761   | 4685  | 0.218128248 | 0.190252025 | 0.225490674 | 0.475286551 |
| SNCG      | 6623     | 855   | 1.195240749 | 0.521246046 | 2.22405012  | 0.710276712 |
| MAGIX     | 79917    | 2622  | 0.389752418 | -           | 0.161163052 | 0.463223943 |
| LOC284551 | 284551   | 2741  | 0.37283139  | 0.731665145 | 0.462498566 | 0.738521937 |
| C19orf23  | 148046   | 1373  | 0.744305055 | 0.811481008 | 1.231083824 | 0.884612657 |
| ADRA1A    | 148      | 2304  | 0.443546372 | 0.290146725 | 0.733627644 | 0.351438998 |
| FOXD4     | 2298     | 2208  | 0.462830996 | 0.1009206   | 0.095690562 | 0.091679739 |
| C21orf56  | 84221    | 2332  | 0.438220772 | 0.191108649 | 0.724819078 | 0.08680483  |
| CGREF1    | 10669    | 1934  | 0.52840271  | -           | -           | -           |
| UPB1      | 51733    | 2167  | 0.471587836 | 6.272632104 | 0.780008348 | 19.24335292 |
| SORBS1    | 10580    | 7226  | 0.141424141 | -           | 0.175437112 | 0.084041875 |
| LOC100123 | 1E+08    | 716   | 1.42727771  | 1.244875334 | 0.590180898 | 1.130887503 |
| ZNF253    | 56242    | 2351  | 0.434679217 | 0.189564172 | 0.089870166 | 0.086103302 |
| SPON2     | 10417    | 2179  | 0.468990748 | 0.204527476 | 0.193928188 | 0.185799782 |
| DOCK3     | 1795     | 8777  | 0.116432818 | 0.076164755 | 0.024072549 | 0.161444917 |
| CRX       | 1406     | 4482  | 0.228007773 | 0.44745519  | 0.329985125 | 0.270989107 |
| FAM157B   | 1E+08    | 1278  | 0.799632895 | 2.266686152 | 0.661298158 | 4.276666119 |
| DACT3     | 147906   | 2834  | 0.360596627 | 0.157256658 | 0.670981952 | 1.142858789 |
| CLK2P     | 1197     | 1812  | 0.563979492 | 0.122976095 | 0.233206138 | -           |
| LRRC19    | 64922    | 3624  | 0.281989746 | 0.430416334 | 0.349809208 | 0.335147124 |
| FGFR3     | 2261     | 4310  | 0.237106923 | -           | 0.588263837 | 0.093934507 |
| CRYM-AS1  | 400508   | 2304  | 0.443546372 | 0.58029345  | 0.550220733 | 0.08785975  |
| SERPIN2   | 5055     | 2180  | 0.468775615 | 47.12195764 | 1.841472691 | 52.37150399 |
| PDE6G     | 5148     | 1064  | 0.960461316 | 0.628287645 | 2.581486746 | 0.951263454 |
| CXCL2     | 2920     | 1234  | 0.828144927 | -           | 1.369755341 | 0.328085677 |
| OCLM      | 10896    | 901   | 1.134218469 | 0.741951226 | 0.70350087  | 1.12335662  |
| C6orf208  | 80069    | 2566  | 0.398258317 | 1.302607276 | 0.247020376 | 0.552222151 |
| SCARNA22  | 677770   | 125   | 8.175446722 | 3.565322956 | 6.761112364 | 1.619430904 |
| HSF2BP    | 11077    | 1916  | 0.533366827 | 0.697805902 | 1.543834373 | 0.211303615 |
| TUBG2     | 27175    | 1841  | 0.555095513 | 0.121038938 | 0.459065207 | 0.219911855 |
| LOC340511 | 340515   | 2041  | 0.500701049 | 0.436712758 | 0.517601081 | 0.099181217 |
| LOC100500 | 1.01E+08 | 977   | 1.045988577 | 0.22807849  | 0.432517423 | 1.243165996 |
| C2CD4A    | 145741   | 3461  | 0.295270396 | 0.450687314 | 0.183141949 | 0.23395419  |
| ZNF365    | 22891    | 3414  | 0.299335337 | 0.195810795 | 0.309438725 | 0.711525002 |
| HHAT      | 55733    | 3641  | 0.280673123 | 0.550808614 | 0.58029322  | 0.722761664 |
| CRB2      | 286204   | 5641  | 0.181161291 | 0.079004675 | 0.112365588 | 0.071770559 |

|            |        |      |             |             |             |   |             |
|------------|--------|------|-------------|-------------|-------------|---|-------------|
| DDR2       | 4921   | 3252 | 0.314246876 | 0.137043472 | 0.324853569 | - |             |
| FAM82B     | 51115  | 3064 | 0.333528342 | 0.145452144 | 0.413743005 |   | 0.396401168 |
| CD180      | 4064   | 2725 | 0.375020492 | 0.081773462 | 1.39564246  |   | 1.931431353 |
| LRRN4CL    | 221091 | 2600 | 0.393050323 | 0.599934151 | 0.568843588 |   | 0.31142902  |
| ZNF69      | 7620   | 1671 | 0.611568426 | 0.133352893 | 0.379326322 |   | 0.242284695 |
| BMP8B      | 656    | 3773 | 0.270853655 | 0.354358894 | 0.503992275 |   | 0.053651965 |
| ANO7       | 50636  | 4128 | 0.247560766 | 0.431846288 | 0.307099944 |   | 0.245189999 |
| C6orf147   | 387097 | 1444 | 0.707708338 | 0.925897582 | 0.146319087 |   | 1.261675739 |
| IGF1       | 3479   | 7370 | 0.138660901 | 0.120940399 | 0.028668217 |   | 0.19226622  |
| KLRC2      | 3822   | 1223 | 0.835593492 | -           | 0.345518825 | - |             |
| MRVI1      | 10335  | 6376 | 0.160277735 | 1.048459934 | 0.198825058 |   | 1.650925482 |
| MAPK8IP2   | 23542  | 3381 | 0.302256977 | 0.131814661 | 0.062491796 |   | 0.538852341 |
| FAM176B    | 55194  | 1054 | 0.969573852 | 0.422832419 | 4.410118359 |   | 2.304692937 |
| LOC100310  | 1E+08  | 851  | 1.200858802 | 1.047392173 | 0.993112862 | - |             |
| HNRNPKP3   | 399881 | 1882 | 0.543002572 | 0.236804128 | 0.336798238 |   | 0.322681503 |
| FBXO44     | 93611  | 3320 | 0.307810494 | 0.201354836 | 0.063639988 |   | 0.243890196 |
| HYI        | 81888  | 1133 | 0.901968968 | 0.590024761 | 1.118895471 |   | 0.893331258 |
| FLJ41941   | 1E+08  | 2379 | 0.429563195 | 0.561999205 | 0.088812426 |   | 0.425449481 |
| RAB3A      | 5864   | 1528 | 0.668802906 | 0.291665818 | 0.55310147  |   | 0.264959245 |
| SMAGP      | 57228  | 1087 | 0.940138767 | 0.81999148  | 0.777496822 | - |             |
| TMEM184    | 202915 | 6293 | 0.16239168  | 0.177048057 | 0.033574569 |   | 0.160836535 |
| LOC40092   | 400927 | 494  | 2.068685911 | 4.059704783 | 3.421615569 |   | 3.27820021  |
| OTX2OS1    | 1E+08  | 2440 | 0.418824115 | 0.365299483 | 0.086592115 |   | 0.414813244 |
| SNTN       | 132203 | 1586 | 0.644344792 | 0.280999602 | 0.799311834 |   | 0.765809065 |
| HIST1H2BL  | 3017   | 829  | 1.23272719  | 2.687969659 | 3.313271288 |   | 13.67432609 |
| MYH7B      | 57644  | 6530 | 0.156497832 | 0.17062227  | 0.064712025 |   | 0.216998781 |
| C9orf66    | 157983 | 2786 | 0.366809347 | 2.159541453 | 0.606704268 |   | 2.325098211 |
| TBC1D3F    | 84218  | 2122 | 0.48158852  | 1.050106903 | 0.696980834 |   | 0.381581269 |
| TTLL7      | 79739  | 3648 | 0.28013455  | 0.061083521 | 0.057917972 | - |             |
| CD109      | 135228 | 9464 | 0.107980858 | 0.070635889 | 0.156275711 |   | 0.085557423 |
| TMEM198    | 130612 | 2239 | 0.456422885 | 0.597139843 | 0.660559772 |   | 0.452051949 |
| ACTA1      | 58     | 1509 | 0.677223884 | 0.295338217 | 0.420049227 |   | 0.134147689 |
| ZNF528     | 84436  | 3995 | 0.255802463 | 0.223111574 | -           |   | 0.050670554 |
| PAM16      | 51025  | 600  | 1.703218067 | 0.742775616 | 1.056423807 |   | 0.674762877 |
| IL18       | 3606   | 1145 | 0.892516018 | 1.751523286 | 0.922640879 |   | 4.066256636 |
| GGT8P      | 645367 | 2484 | 0.41140533  | 0.5382432   | 0.34023311  |   | 1.222396515 |
| OTUD6A     | 139562 | 1689 | 0.605050823 | 0.527726903 | 0.625472947 |   | 0.838959172 |
| KLF11      | 8462   | 4054 | 0.252079635 | 0.164898385 | 0.469058424 |   | 0.149799356 |
| DEFA4      | 1669   | 542  | 1.885481255 | 369.6062428 | 3.118594264 |   | 136.6955052 |
| LOC728613  | 728613 | 2583 | 0.395637182 | 0.17253789  | 0.163596408 |   | 0.156739344 |
| MXRA8      | 54587  | 2290 | 0.446258009 | 2.043443834 | 0.738112703 |   | 1.414350134 |
| RNF138P1   | 379013 | 5701 | 0.179254664 | 0.273606173 | 0.185305    |   | 0.248553243 |
| CHRNA7     | 1139   | 3428 | 0.298112847 | 0.130007401 | 0.308174973 |   | 0.177154781 |
| SERTAD1    | 29950  | 1213 | 0.842482144 | 2.755556695 | 1.74183645  |   | 8.84478956  |
| FBLN1      | 2192   | 2947 | 0.346769881 | -           | -           | - |             |
| C3orf70    | 285382 | 5901 | 0.173179265 | 0.113285554 | 0.322244171 |   | 0.102912488 |
| LOC100128  | 1E+08  | 1897 | 0.53870893  | 0.469863331 | 0.891026932 |   | 0.533549981 |
| SLAMF7     | 57823  | 2672 | 0.382459147 | 0.750559193 | 0.553515468 |   | 20.22773443 |
| ACSBG2     | 81616  | 2712 | 0.376818156 | 0.246496333 | 0.155814721 |   | 0.223925733 |
| LILRB2     | 10288  | 2940 | 0.347595524 | 4.320225521 | 0.431193391 |   | 11.63621695 |
| CCNB3      | 85417  | 4524 | 0.22589099  | 0.098511355 | -           |   | 0.089491098 |
| MYO3B      | 140469 | 6212 | 0.16450915  | 0.179356636 | 0.034012357 |   | 0.097760236 |
| C17orf77   | 146723 | 2525 | 0.404725085 | 0.706004546 | 0.167354266 |   | 0.962038161 |
| CCRL1      | 51554  | 2402 | 0.425449975 | 0.556617864 | 0.351848062 |   | 0.337100521 |
| MDFIC      | 29969  | 5312 | 0.192381559 | 0.041948924 | 0.159099971 |   | 0.076215686 |
| CCDC114    | 93233  | 3234 | 0.315995931 | 0.41341871  | 0.195996996 |   | 1.439661054 |
| FRG1B      | 284802 | 978  | 1.04491906  | 0.455690562 | 0.864150353 |   | 0.206982477 |
| FAM98C     | 147965 | 1291 | 0.791580821 | 3.106884838 | 1.636597687 |   | 2.352000731 |
| CEACAM5    | 1048   | 3600 | 0.283869678 | 0.30948984  | 0.058690211 |   | 0.168690719 |
| ADORA2A    | 135    | 2590 | 0.394567892 | 4.559896638 | 0.571039896 |   | 14.30288877 |
| CYP1B1-AS1 | 285154 | 1776 | 0.575411509 | -           | 0.23793329  |   | 0.113980216 |
| LAMA2      | 3908   | 9708 | 0.105266877 | -           | 0.065291953 |   | 0.020851758 |



|           |          |       |             |             |             |             |
|-----------|----------|-------|-------------|-------------|-------------|-------------|
| BMP3      | 651      | 5734  | 0.178223028 | 0.116584941 | 0.184238543 | 0.035303255 |
| MGC50722  | 399693   | 3630  | 0.281523647 | 0.736636974 | 0.698462021 | 0.278827635 |
| APC2      | 10297    | 10151 | 0.100672923 | 0.285373353 | 0.145699274 | 0.199417656 |
| TFAMP1    | 260341   | 2223  | 0.45970798  | 0.300718873 | 0.095044877 | 0.091061117 |
| AGBL2     | 79841    | 3613  | 0.282848281 | 0.246701007 | 0.701748446 | 0.392195417 |
| LOC285103 | 285103   | 1835  | 0.55691054  | 0.242869411 | 0.575707797 | 0.110315457 |
| CSF1      | 1435     | 2973  | 0.343737249 | 3.97246293  | 0.142135729 | 48.07089716 |
| ALOX15    | 246      | 2707  | 0.377514163 | 0.082317209 | 0.234153781 | 0.523458456 |
| RGS3      | 5998     | 4643  | 0.220101409 | 0.191973022 | 0.273036521 | 1.787547573 |
| MOV10L1   | 54456    | 3966  | 0.25767293  | -           | 0.372918137 | 0.051041065 |
| ROS1      | 6098     | 7368  | 0.13869854  | 0.060486614 | -           | -           |
| LYG1      | 129530   | 1015  | 1.006828414 | 0.878158364 | 1.873460938 | 1.994373034 |
| UPP1      | 7378     | 1857  | 0.550312784 | 7.799743946 | 0.568887349 | 32.70256267 |
| GHRL      | 51738    | 1374  | 0.743763348 | 6.973657528 | 1.076414359 | 7.513735088 |
| CECR2     | 27443    | 5760  | 0.177418549 | -           | 0.513539351 | 0.210863399 |
| PRELP     | 5549     | 5833  | 0.175198155 | 0.343818646 | 0.326000832 | 0.312336665 |
| ANXA8L1   | 728113   | 1954  | 0.522994289 | -           | 0.324388068 | -           |
| RGL1      | 23179    | 5113  | 0.199869126 | 0.217907965 | 0.206615257 | 0.435501172 |
| LOC100133 | 1E+08    | 3021  | 0.338275684 | 0.221283699 | 0.419632098 | 0.201021711 |
| SIRT4     | 23409    | 1213  | 0.842482144 | 0.367407559 | 0.34836729  | 0.333765644 |
| FTH1P3    | 2498     | 954   | 1.071206331 | 1.167886188 | 0.442944992 | 0.212189584 |
| SLC7A5P1  | 81893    | 615   | 1.661676163 | 0.724659137 | 0.687104915 | 0.329152623 |
| ESRP1     | 54845    | 3806  | 0.268505213 | 0.351286418 | 0.0555136   | 1.170109034 |
| ASPHD1    | 253982   | 1562  | 0.654245096 | -           | 0.811593193 | 0.259191886 |
| KLF2      | 10365    | 1655  | 0.61748087  | 0.134642106 | 1.404309592 | 1.100821611 |
| CCNI2     | 645121   | 2355  | 0.433940909 | 0.094621098 | -           | 0.085957054 |
| ZNF835    | 90485    | 2774  | 0.368396121 | 0.321316056 | 0.1523322   | 0.291894539 |
| C8orf39   | 55472    | 709   | 1.441369309 | 0.628583032 | 1.788023368 | 0.571026412 |
| PAOX      | 196743   | 1878  | 0.544159127 | 1.186542517 | 0.900041582 | 1.509054356 |
| LOC643803 | 643802   | 1344  | 0.760365208 | 1.492183157 | 0.786029618 | 2.56048413  |
| ITGB5     | 3693     | 3392  | 0.301276781 | 0.197080794 | 0.186867419 | 0.358069923 |
| MCART6    | 401612   | 6239  | 0.163797218 | 0.392876989 | 0.304786481 | 0.097337168 |
| SPP1      | 6696     | 1641  | 0.622748836 | 47.39098536 | 5.536407519 | 517.1126103 |
| VGF       | 7425     | 2586  | 0.395178206 | 0.258506595 | 0.326813243 | 0.547951292 |
| LINC00176 | 284739   | 5264  | 0.194135798 | 0.084662874 | 0.160550731 | 0.038455331 |
| CAMK2N2   | 94032    | 1360  | 0.751419735 | 0.327695125 | 0.776782211 | -           |
| FUT6      | 2528     | 3137  | 0.325766924 | 0.781370587 | 0.20205747  | 0.774353317 |
| CNTNAP2   | 26047    | 9894  | 0.103287936 | 0.112610008 | 0.08541935  | -           |
| PPM1N     | 147699   | 1718  | 0.594837509 | 0.259409412 | 0.368948943 | 0.471312836 |
| CRLF2     | 64109    | 1579  | 0.647201292 | -           | -           | 0.512802693 |
| LFNG      | 3955     | 2384  | 0.428662265 | 18.88095735 | 1.152140058 | 27.34148233 |
| GGT7      | 2686     | 2640  | 0.387095015 | 0.50643792  | 0.720288959 | 1.150163994 |
| C15orf58  | 390637   | 1351  | 0.756425492 | 0.989634425 | 1.094739696 | 1.947872108 |
| LMOD3     | 56203    | 4099  | 0.249312232 | 0.543626945 | 0.360818085 | 0.296309631 |
| MESTIT1   | 317751   | 3242  | 0.315216175 | 0.137466184 | 0.195513351 | 0.187318504 |
| LOC100503 | 1.01E+08 | 4365  | 0.234119322 | 0.255249353 | 0.242021491 | 0.278252733 |
| VSIG4     | 11326    | 2209  | 0.462621476 | 1.31137388  | 0.76517795  | 14.47884126 |
| ESRP2     | 80004    | 4021  | 0.254148431 | 0.720423999 | 0.420362619 | 0.55377207  |
| CHN1      | 1123     | 2523  | 0.405045914 | 0.52992315  | 0.921178111 | 0.802333979 |
| GSDMC     | 56169    | 2731  | 0.374196573 | 0.326375225 | 0.154730693 | 0.444735693 |
| ST6GAL2   | 84620    | 6871  | 0.14873102  | 0.129723583 | 0.18450132  | 0.206229376 |
| TYMP      | 1890     | 1671  | 0.611568426 | 1.866940507 | 1.643747395 | 34.40442674 |
| CLDN18    | 51208    | 3359  | 0.30423663  | 0.199016985 | 0.06290109  | 0.180793864 |
| SERINC2   | 347735   | 2871  | 0.355949439 | 0.077615007 | 0.220778225 | 0.352540688 |
| LETM2     | 137994   | 1854  | 0.551203258 | 0.721141375 | 0.911692606 | 1.310219178 |
| KIAA1244  | 57221    | 14895 | 0.068608986 | 0.044880702 | 0.014184945 | 0.054361561 |
| AFAP1     | 60312    | 7786  | 0.131252356 | 0.171717969 | -           | 0.129995417 |
| ABHD4     | 63874    | 2543  | 0.401860338 | 0.175251817 | 0.997018142 | 2.86568583  |
| C19orf81  | 342918   | 765   | 1.335857307 | 0.873853666 | 0.828567692 | 0.264612893 |
| ZNF853    | 54753    | 3578  | 0.285615103 | 0.124557118 | 1.062919426 | 0.113151964 |
| LGMN      | 5641     | 2191  | 0.466422109 | 0.406814577 | 0.28929908  | 0.739128664 |
| WTIP      | 126374   | 2204  | 0.46367098  | -           | 0.287592688 | 0.183692253 |

|           |        |      |             |             |             |             |
|-----------|--------|------|-------------|-------------|-------------|-------------|
| SRRM5     | 1E+08  | 2415 | 0.423159768 | 0.369081051 | 0.262465542 | 0.167642951 |
| OSGIN1    | 29948  | 2409 | 0.424213715 | 0.185000153 | 0.438532091 | 1.008362954 |
| LOC100124 | 1E+08  | 1837 | 0.556304214 | -           | 0.690097206 | -           |
| MAFIP     | 727764 | 2293 | 0.445674156 | 0.09717954  | 0.645003633 | 0.264843693 |
| LOC100129 | 1E+08  | 2799 | 0.365105695 | 0.159223069 | -           | -           |
| ZNF815    | 401303 | 2821 | 0.362258362 | 0.710916045 | 0.973662495 | 0.932851903 |
| LSR       | 51599  | 2285 | 0.447234503 | -           | 0.092465979 | -           |
| LRIT3     | 345193 | 3641 | 0.280673123 | 0.122401914 | 0.174087966 | 0.111194102 |
| LOC440890 | 440896 | 3182 | 0.321159912 | 0.140058256 | 0.398399927 | 0.445318052 |
| C10orf111 | 221060 | 1785 | 0.572510275 | 0.124836238 | 0.118366813 | 0.113405525 |
| FLJ22184  | 80164  | 4518 | 0.226190978 | -           | 0.093530218 | -           |
| CCDC13    | 152206 | 2847 | 0.358950067 | -           | 0.222639369 | 0.213307548 |
| SAA2      | 6289   | 2053 | 0.497774399 | 0.434160126 | 0.205830259 | 0.295804476 |
| NME1-NM   | 654364 | 1312 | 0.778910701 | 0.169841985 | 0.322080429 | 0.154290292 |
| CD74      | 972    | 1519 | 0.67276553  | 7.774938967 | 0.834567853 | 37.18081156 |
| FLJ27354  | 400761 | 789  | 1.295222865 | -           | 0.535576074 | 0.769691494 |
| TMEM38A   | 79041  | 1639 | 0.623508749 | 0.679782443 | 0.773464654 | 1.23507543  |
| TBC1D30   | 23329  | 7840 | 0.130348321 | 0.426338045 | 0.215596695 | 0.154920048 |
| LOC100294 | 1E+08  | 3699 | 0.276272193 | 0.843378639 | 0.571194272 | 3.611869412 |
| MCTP2     | 55784  | 7637 | 0.133813126 | 0.029178039 | 0.442654993 | 0.053012665 |
| HIST1H2AC | 8334   | 546  | 1.871668206 | 0.81623694  | 3.482715847 | 19.64968816 |
| ZNF703    | 80139  | 2174 | 0.470069384 | 0.307496805 | 0.194374205 | 0.651794867 |
| IRAK1BP1  | 134728 | 1157 | 0.883259153 | 0.770380933 | 0.730457256 | 0.349920247 |
| ROR2      | 4920   | 4099 | 0.249312232 | 4.457740949 | 5.618453034 | 14.66732674 |
| TUBB4A    | 10382  | 2318 | 0.440867489 | -           | 1.002645546 | -           |
| SCARNA9L  | 1E+08  | 348  | 2.936582874 | 3.201619034 | 7.285681426 | 1.16338427  |
| TMEM45B   | 120224 | 2207 | 0.463040707 | 0.201932655 | 0.57440352  | 0.183442558 |
| ZNF677    | 342926 | 3509 | 0.291231359 | 0.381019125 | 0.060212243 | 0.230753905 |
| USP6      | 9098   | 7971 | 0.128206102 | 0.27955424  | 0.159040091 | 0.152374003 |
| CYP2B6    | 1555   | 3052 | 0.334839725 | 0.29204808  | 0.62305467  | 0.132653252 |
| MTRNR2L4  | 1E+08  | 1231 | 0.830163152 | 0.905088078 | 0.686546747 | 0.657770473 |
| C1orf150  | 148823 | 2644 | 0.386509395 | 0.16855725  | 0.799110293 | 0.765615972 |
| SERPING1  | 710    | 1984 | 0.515086109 | 0.336944584 | 1.59741503  | 122.2327509 |
| SLC22A20  | 440044 | 2377 | 0.429924628 | 1.218689483 | 1.511081592 | 0.596130434 |
| KLF8      | 11279  | 5434 | 0.188062356 | 0.082014238 | 0.07776399  | 0.111756825 |
| VWA5A     | 4013   | 3552 | 0.287705755 | 0.125468854 | 0.23793329  | 0.797861509 |
| PLEKHH2   | 130271 | 6972 | 0.146576426 | 0.12784434  | 0.090914269 | 0.20324183  |
| CHST5     | 23563  | 3265 | 0.312995663 | 0.34124454  | 0.647120249 | 0.433997562 |
| CEACAM8   | 1088   | 2333 | 0.438032936 | 0.382053467 | 0.362254199 | 0.347070489 |
| KIAA1683  | 80726  | 4421 | 0.231153775 | 0.201612924 | 0.095582339 | 0.824184468 |
| TAS2R10   | 50839  | 924  | 1.105985758 | 0.964643657 | 0.457326323 | 0.657236568 |
| AQP6      | 363    | 2654 | 0.385053067 | 0.503766431 | 0.557269529 | 0.152546242 |
| PLA2G2F   | 64600  | 2737 | 0.373376266 | 0.081414938 | -           | 0.221880376 |
| PECR      | 55825  | 1874 | 0.545320619 | 1.189075159 | 0.789217358 | 1.620295061 |
| DMBX1     | 127343 | 2896 | 0.352876671 | -           | 0.14591489  | 0.419396816 |
| TRIM69    | 140691 | 1911 | 0.534762344 | 0.233210554 | 0.110562408 | 3.28377538  |
| AQP5      | 362    | 1835 | 0.55691054  | -           | -           | -           |
| SLC35F1   | 222553 | 4852 | 0.210620536 | 0.413333504 | 0.304821379 | 0.333765644 |
| FCGR1C    | 1E+08  | 1338 | 0.763774918 | 0.333083236 | 0.789554415 | 1.966797622 |
| PARVA     | 55742  | 8719 | 0.117207345 | 0.051114276 | 0.024232683 | -           |
| INHBE     | 83729  | 2453 | 0.416604501 | 0.090840882 | 0.344532835 | 0.165045954 |
| FLJ46906  | 441172 | 1022 | 0.999932329 | -           | 0.413473114 | -           |
| ECSCR     | 641700 | 1027 | 0.995064109 | 1.301846259 | 0.20573005  | 1.379748822 |
| RAB26     | 25837  | 1641 | 0.622748836 | 0.407372367 | 0.38626099  | 0.123357016 |
| CCDC107   | 203260 | 1272 | 0.803404749 | 0.700731713 | 0.996626233 | 0.318284376 |
| C20orf203 | 284805 | 4803 | 0.212769278 | 0.371155836 | 0.131970494 | 0.25287803  |
| MANSC1    | 54682  | 2297 | 0.444898058 | 1.261134045 | 1.103795009 | 1.76254996  |
| NAV3      | 89795  | 9758 | 0.083781991 | -           | 0.281482056 | 0.082979653 |
| FAM196B   | 1E+08  | 3548 | 0.23042409  | 0.125610307 | 0.059550384 | 0.228217433 |
| SSPN      | 8082   | 4547 | 0.179798696 | 0.735097926 | 0.836403278 | 6.544324358 |
| PTPRH     | 5794   | 3935 | 0.207762306 | 0.283141912 | 0.429549705 | 1.954840354 |
| NCF1B     | 654816 | 1552 | 0.526768474 | 94.18701108 | 6.262306071 | 153.3868188 |

|           |          |       |             |             |             |   |             |
|-----------|----------|-------|-------------|-------------|-------------|---|-------------|
| LOC40065  | 400655   | 2674  | 0.305738471 | 0.249999272 | 0.237043487 | - |             |
| BEST3     | 144453   | 3552  | 0.230164604 | 0.125468854 | 0.23793329  | - |             |
| PCGF2     | 7703     | 2622  | 0.311801934 | 0.254957305 | 0.080581526 |   | 0.308815962 |
| GDF9      | 2661     | 2020  | 0.404725085 | 0.220626421 | 0.627578499 | - |             |
| SGK2      | 10110    | 2146  | 0.380962103 | 0.103836293 | 0.098455154 | - |             |
| PLCH1     | 23007    | 6473  | 0.126300737 | 0.275399579 | -           |   | 0.125091218 |
| C9orf68   | 55064    | 3763  | 0.217258749 | 0.059216764 | 0.112295914 | - |             |
| RIBC1     | 158787   | 1949  | 0.41946879  | 0.228663607 | 0.216813506 | - |             |
| TSHZ2     | 128553   | 12204 | 0.066989894 | 0.109553926 | 0.017312747 |   | 0.132696731 |
| DNAJC28   | 54943    | 1912  | 0.427586126 | 0.466177165 | 0.884036658 |   | 1.058728363 |
| SEMA6B    | 10501    | 3961  | 0.206398554 | 11.92641484 | 0.320047606 |   | 78.1403008  |
| CSPG4     | 1464     | 8305  | 0.098440057 | 0.053662296 | 0.02544067  |   | 0.097497345 |
| IL21R     | 50615    | 5006  | 0.163312959 | 0.267078727 | 0.126618914 |   | 0.363935231 |
| CAV2      | 858      | 3121  | 0.261949591 | 0.571182787 | 0.338488884 |   | 0.194580772 |
| TP53I3    | 9540     | 2042  | 0.400364678 | 0.218249446 | 0.206939041 |   | 0.49566323  |
| FLJ42289  | 388182   | 3176  | 0.25741331  | 0.420968548 | 0.199576286 |   | 0.063737048 |
| LINC00092 | 1E+08    | 1805  | 0.452933336 | 0.617265055 | 0.351165808 |   | 0.897191636 |
| HOTAIR    | 1E+08    | 2337  | 0.349826561 | 0.476749432 | 0.271225624 |   | 0.346476445 |
| ADAM32    | 203102   | 2742  | 0.298156336 | 0.081266479 | -           |   | 0.07382526  |
| KDM4D     | 55693    | 2988  | 0.273609328 | 1.044062111 | 0.353555491 |   | 0.20324183  |
| QPCT      | 25797    | 1719  | 0.475593178 | 1.296292523 | 1.106202939 |   | 4.474867244 |
| SLAMF6    | 114836   | 2754  | 0.296857179 | 0.242737129 | 0.537034615 |   | 1.69058237  |
| LOC38924  | 389247   | 810   | 1.00931441  | -           | 0.260845384 | - |             |
| GHRLOS    | 1E+08    | 1725  | 0.47393894  | 1.937675519 | 1.224839196 |   | 0.821450458 |
| FAM116B   | 414918   | 2029  | 0.402929853 | 0.658943375 | 0.62479476  |   | 0.897910186 |
| SHROOM2   | 357      | 7445  | 0.109811239 | -           | 0.056758834 | - |             |
| LOC10050  | 1.01E+08 | 1749  | 0.46743549  | 1.019246128 | 0.845622258 |   | 1.273137503 |
| SYCP3     | 50511    | 1141  | 0.716515927 | 0.195295955 | 1.481400606 |   | 0.177413552 |
| SLC16A14  | 151473   | 4411  | 0.185342252 | 0.101034996 | 0.143698545 | - |             |
| GALNTL2   | 117248   | 4641  | 0.176157008 | 0.240069688 | 0.273154184 |   | 0.392557588 |
| C13orf16  | 121793   | 736   | 1.110794392 | -           | -           |   | 0.275039216 |
| TMEM136   | 219902   | 4462  | 0.183223817 | 0.249700454 | 0.189408123 |   | 0.13610188  |
| MYOM2     | 9172     | 5018  | 0.162922414 | 0.044406673 | 0.126316119 |   | 0.161362186 |
| B4GALNT3  | 283358   | 3438  | 0.237796589 | 0.324073131 | 0.184367157 |   | 1.059836979 |
| HSP90AB3  | 3327     | 1794  | 0.45571052  | 0.372629908 | 0.471091999 |   | 0.225673203 |
| PARK2     | 5071     | 4073  | 0.200722974 | 0.437677751 | 0.829991697 |   | 0.248500937 |
| NLRP11    | 204801   | 4059  | 0.201415292 | 0.109796839 | 0.156160208 |   | 0.049871609 |
| SLC17A7   | 57030    | 2993  | 0.273152246 | -           | -           |   | 0.067634101 |
| LILRB1    | 10859    | 2971  | 0.275174915 | 0.600020693 | 0.426694234 |   | 0.613214327 |
| CDRT15P1  | 94158    | 1101  | 0.742547386 | 0.404782352 | 1.151415593 |   | 0.551577283 |
| ZNF137P   | 7696     | 2484  | 0.329124264 | 0.5382432   | 0.425291388 |   | 1.140903414 |
| UPK3A     | 7380     | 1056  | 0.77419003  | 1.6881264   | 0.600240799 |   | 1.150163994 |
| SLC26A7   | 115111   | 5280  | 0.154838006 | 0.08440632  | 0.12004816  |   | 0.0383388   |
| PATE4     | 399968   | 1986  | 0.411653913 | 0.112201755 | 0.212774181 |   | 0.203855854 |
| MYOM1     | 8736     | 5848  | 0.139799021 | 0.381040843 | 0.325164646 |   | 0.415380704 |
| CELA1     | 1990     | 952   | 0.858765412 | -           | 1.109688873 | - |             |
| CD72      | 971      | 1548  | 0.528129633 | 0.431846288 | 0.545955456 |   | 0.915375995 |
| DPPA4     | 55211    | 2823  | 0.289601372 | 0.394673547 | 0.224532159 |   | 0.358535003 |
| MZB1      | 51237    | 845   | 0.967508488 | -           | 1.250205689 | - |             |
| STAB2     | 55576    | 8266  | 0.098904509 | 0.026957741 | -           | - |             |
| NKPD1     | 284353   | 4687  | 0.174428136 | 0.380341685 | 0.180315563 |   | 0.561462603 |
| LOC72901  | 729013   | 1113  | 0.734541484 | 0.400418122 | 0.569500704 |   | 0.545630358 |
| DIP2C     | 22982    | 7896  | 0.103539092 | 0.028220958 | 0.133792275 |   | 0.051273775 |
| SUGT1P3   | 283507   | 1078  | 0.758390234 | 0.82683742  | 0.195996996 |   | 0.938909383 |
| DSEL      | 92126    | 9281  | 0.088087994 | 0.240095555 | 0.091061205 |   | 0.065433314 |
| DMGDH     | 29958    | 3104  | 0.263384237 | 0.143577761 | -           | - |             |
| KBTBD10   | 10324    | 2472  | 0.330721955 | 0.540856031 | 0.341884727 |   | 0.081888699 |
| PLAC4     | 191585   | 10009 | 0.081680954 | 0.111316158 | 0.126656866 |   | 0.10112342  |
| NDST3     | 9348     | 5961  | 0.137148913 | 0.299054098 | 0.106333549 |   | 0.135835506 |
| KCNV2     | 169522   | 2174  | 0.376055507 | 0.102498935 | 0.097187103 | - |             |
| RPA4      | 29935    | 1560  | 0.524067098 | 0.285682929 | 0.270877899 | - |             |
| FAM59B    | 150946   | 5169  | 0.158163024 | 0.21554719  | 0.08175073  |   | 0.117486281 |

|           |          |       |             |             |             |             |
|-----------|----------|-------|-------------|-------------|-------------|-------------|
| RANBP3L   | 202151   | 2635  | 0.310263633 | -           | 0.08018397  | -           |
| SCARNA12  | 677777   | 270   | 3.02794323  | 3.301224959 | 9.390433838 | 6.747628765 |
| C17orf109 | 643008   | 4368  | 0.187166821 | 0.153044426 | 0.241855267 | 0.185374417 |
| SULT2A1   | 6822     | 1987  | 0.41144674  | 0.112145287 | 0.531667744 | 0.407506518 |
| CCL3      | 6348     | 813   | 1.005590003 | 3.289043317 | 3.638359974 | 72.45608748 |
| LOC285954 | 285954   | 1858  | 0.440013279 | 0.239862955 | 0.454864933 | -           |
| SPDYA     | 245711   | 1830  | 0.446745722 | 0.487065978 | 0.230912307 | 0.22123373  |
| SYNC      | 81493    | 3493  | 0.234052297 | 0.318970347 | 0.181464152 | 0.17385817  |
| FAT2      | 2196     | 14565 | 0.05613077  | 0.12239351  | 0.058025338 | 0.055593234 |
| OSTalpha  | 200931   | 1455  | 0.561886373 | 1.378346504 | 0.726064472 | 1.11301093  |
| KRT42P    | 284116   | 2864  | 0.285455542 | 0.155609417 | 0.295090449 | 0.282721876 |
| EFHC2     | 80258    | 3269  | 0.250090141 | -           | 0.452429896 | -           |
| CDHR3     | 222256   | 6500  | 0.125776103 | 0.102845854 | 0.065010696 | 0.093428706 |
| HIF3A     | 64344    | 5899  | 0.138590383 | 0.151098617 | 0.25071933  | 0.240210551 |
| INCA1     | 388324   | 1574  | 0.519405764 | 1.274138604 | 1.073874264 | 1.414687098 |
| KIF26B    | 55083    | 7287  | 0.112192215 | 0.030579482 | 0.086984257 | -           |
| ZP3       | 7784     | 1494  | 0.547218656 | -           | 0.141422196 | 0.135494554 |
| SIGLEC6   | 946      | 2122  | 0.385270816 | 1.260128283 | 1.095255596 | 11.1612521  |
| HOXC9     | 3225     | 1640  | 0.498502849 | 0.81524153  | 0.644160858 | 1.110890102 |
| CCDC28B   | 79140    | 895   | 0.913457734 | 0.497950134 | 1.180361795 | 0.678532502 |
| GLB1L3    | 112937   | 2959  | 0.276290866 | 0.301227016 | 0.14280822  | 0.136822483 |
| RNY3      | 6085     | 102   | 8.015143845 | 8.738536657 | 2.071419229 | 3.969193391 |
| CREB5     | 9586     | 8532  | 0.095820988 | 0.078351858 | 0.049527605 | 0.237258395 |
| LOC100501 | 1.01E+08 | 2874  | 0.284462308 | 0.310135956 | 0.367579613 | 0.493041768 |
| DAGLA     | 747      | 5761  | 0.141910202 | -           | 0.330075135 | 0.878444988 |
| FAM83H    | 286077   | 5604  | 0.145885916 | 0.079526297 | 0.188512457 | 0.180611048 |
| FKBP6     | 8468     | 1570  | 0.520729091 | 2.270906341 | 0.942033968 | 0.644677908 |
| LOC574538 | 574538   | 2907  | 0.281233117 | 0.07665383  | 0.072681376 | 0.139269944 |
| FCHSD1    | 89848    | 4333  | 0.188678669 | 0.617122598 | 0.341332409 | 0.934358934 |
| ALS2CR12  | 130540   | 2013  | 0.406132475 | 0.332090439 | 0.419840559 | 0.301682359 |
| AKR1B10   | 57016    | 1610  | 0.507791722 | 0.276810788 | 0.262465542 | 0.251464426 |
| NHLH1     | 4807     | 2594  | 0.315167568 | 0.859031167 | 0.814513344 | 0.70233607  |
| STL       | 7955     | 5360  | 0.152526991 | 0.20786631  | 0.039418799 | 0.075533158 |
| LOC100501 | 1.01E+08 | 3123  | 0.261781835 | 0.142704249 | 0.202963267 | 0.324093601 |
| LINC00324 | 284029   | 2115  | 0.386545944 | 1.158940677 | 0.699287626 | 1.148532556 |
| WDR66     | 144406   | 3768  | 0.216970454 | 0.118276372 | 0.448587604 | 0.214892636 |
| C6orf163  | 206412   | 1304  | 0.626951436 | 1.708839607 | 2.268394677 | 1.862842297 |
| CSMD1     | 64478    | 14340 | 0.057011483 | 0.093235433 | 0.014733944 | 0.028232756 |
| ANXA8     | 653145   | 2070  | 0.394949117 | -           | 0.816559464 | -           |
| DPRXP4    | 503645   | 670   | 1.220215929 | 0.332586097 | 0.94605117  | 0.604265263 |
| LOC440173 | 440173   | 2018  | 0.4051262   | 1.104225395 | 0.62820048  | 1.103427895 |
| EIF4A1    | 1973     | 1894  | 0.431649774 | 0.352955678 | 0.223109568 | -           |
| TUBA8     | 51807    | 2124  | 0.384908038 | 0.629470861 | 0.895274413 | 0.476527455 |
| PRH2      | 5555     | 4323  | 0.189115122 | 0.773187664 | 0.146623707 | 0.37460812  |
| SEC14L5   | 9717     | 6456  | 0.126633314 | 0.172577978 | 0.065453767 | 0.094065457 |
| CYP2W1    | 54905    | 2354  | 0.347300201 | 0.094661293 | 0.718045068 | 0.343974279 |
| ENG       | 2022     | 3196  | 0.255802463 | 0.766946036 | 0.330545622 | 2.09016035  |
| LOC494141 | 494141   | 2093  | 0.390609017 | 0.745259815 | 0.605689712 | 1.160605043 |
| DFNB59    | 494513   | 1534  | 0.532949591 | 0.290525013 | 0.27546905  | 0.263922898 |
| SCLY      | 51540    | 2544  | 0.321361899 | 0.087591464 | 0.083052186 | 0.079571094 |
| C11orf35  | 256329   | 2098  | 0.389678109 | 1.699391304 | 0.30212311  | 1.254325652 |
| OLFML1    | 283298   | 2921  | 0.279885201 | 0.228859313 | -           | 0.207903659 |
| ZFP42     | 132625   | 2646  | 0.308973799 | 0.589504457 | 0.319402512 | 0.30601491  |
| AGAP8     | 728404   | 2420  | 0.337828377 | 0.092079622 | 0.436538763 | 0.167296581 |
| MUSTN1    | 389125   | 742   | 1.101812227 | -           | 0.284750352 | 0.545630358 |
| GNN       | 253724   | 4516  | 0.181032921 | 0.148028799 | 0.140357459 | 0.044824815 |
| SVOP      | 55530    | 3486  | 0.234522281 | 0.12784434  | 0.181828538 | 0.116138189 |
| LOC645434 | 645434   | 1690  | 0.483754244 | 0.13185366  | 0.250041138 | -           |
| LOC339822 | 339822   | 1531  | 0.533993907 | -           | -           | -           |
| DDT       | 1652     | 688   | 1.188291675 | 2.914962446 | 1.228399775 | 1.471139992 |
| TTYH2     | 94015    | 3468  | 0.235739525 | 0.514031568 | 0.48739276  | 0.291852455 |
| ADAP2     | 55803    | 2757  | 0.296534157 | 1.61648665  | 0.229907248 | 6.167582332 |

|           |        |       |             |             |             |              |
|-----------|--------|-------|-------------|-------------|-------------|--------------|
| LOC100134 | 1E+08  | 1648  | 0.496082932 | 0.946498054 | 1.153860954 | 1.105497431  |
| COL15A1   | 1306   | 5273  | 0.155043556 | 0.042259185 | 0.560968454 | 0.038389695  |
| LOC100190 | 1E+08  | 3272  | 0.249860841 | 0.612926089 | 0.581162241 | 0.618670119  |
| NEK11     | 79858  | 2963  | 0.275917878 | 0.676845819 | 0.285230862 | 0.204956662  |
| OR51E2    | 81285  | 2785  | 0.293552845 | 0.560082152 | 0.303461058 | 0.218056226  |
| ZMYND10   | 51364  | 1780  | 0.45929476  | 0.375560705 | 0.474797217 | 0.11372408   |
| TLR8-AS1  | 349408 | 1660  | 0.49249679  | 0.671182785 | 1.527359721 | 1.097505883  |
| ANGPT2    | 285    | 5270  | 0.155131816 | 0.126849726 | 0.280643896 | 0.422527038  |
| FOXD1     | 2297   | 2272  | 0.359834803 | 1.27501096  | 1.487920855 | 0.801874897  |
| SIDT1     | 54847  | 5021  | 0.162825069 | 0.088760281 | -           | 0.161265774  |
| LOC646938 | 646938 | 481   | 1.699677073 | 3.706156919 | 1.757045833 | 1.262550081  |
| TUBB2A    | 7280   | 1621  | 0.50434588  | -           | 1.564106808 | 0.249758005  |
| ARGFXP2   | 503640 | 1215  | 0.672876273 | 0.55020416  | 0.347793846 | 0.666432471  |
| BDKRB2    | 624    | 4197  | 0.194792631 | -           | 0.050341854 | -            |
| MRGPRE    | 116534 | 1296  | 0.630821506 | -           | 0.163028365 | 0.15619511   |
| BTBD8     | 284697 | 1465  | 0.558050971 | 0.304208443 | 0.28844336  | 0.414530095  |
| LOC100128 | 1E+08  | 2702  | 0.302570197 | 0.412347677 | 0.234587078 | 0.449508948  |
| CDC42BPG  | 55561  | 4945  | 0.165327537 | 0.360497771 | 0.384542538 | 0.736849248  |
| FRMPD2    | 143162 | 5024  | 0.162727841 | -           | 0.042055088 | -            |
| GPBAR1    | 151306 | 2023  | 0.4041249   | 0.220299243 | 0.104441306 | -            |
| C11orf70  | 85016  | 2198  | 0.37194935  | 0.506898737 | 0.38450366  | 0.184193688  |
| MAMSTR    | 284358 | 1823  | 0.448461148 | 0.244468113 | 0.579497426 | 0.444166457  |
| C10orf131 | 1E+08  | 1176  | 0.695191048 | 0.189483575 | 0.179663913 | 0.344266774  |
| MORN1     | 79906  | 1641  | 0.498199069 | 0.271581578 | 0.38626099  | -            |
| RPSAP9    | 653162 | 1440  | 0.567739356 | 0.92846952  | 0.293451057 | 0.281151199  |
| ANKRD34A  | 284615 | 3612  | 0.226341271 | 0.308461634 | 0.409466592 | 0.224173713  |
| UG0898HC  | 643763 | 7056  | 0.115865175 | 0.15790298  | 0.239551884 | 0.25820008   |
| LOC727849 | 727849 | 3296  | 0.248041466 | 0.067607004 | 0.384620318 | 0.122833048  |
| CCDC96    | 257236 | 2168  | 0.377096251 | 1.336173848 | 0.194912141 | 0.653598727  |
| C19orf35  | 374872 | 2570  | 0.318110767 | 0.606937274 | 0.575483786 | 0.787660945  |
| ERBB3     | 2065   | 1050  | 0.778613973 | -           | -           | 1.349525753  |
| S100A8    | 6279   | 532   | 1.536738106 | 68.69278251 | 15.48892048 | 297.9357137  |
| SEC14L4   | 284904 | 2526  | 0.323651889 | 0.617509419 | 0.418220034 | 0.961657306  |
| GRIK3     | 2899   | 9225  | 0.088622729 | -           | -           | -            |
| HOGA1     | 112817 | 2501  | 0.326887114 | 0.623682044 | 0.33792045  | 0.647513356  |
| CAPN5     | 726    | 4393  | 0.186101678 | -           | 0.33667046  | 0.506878555  |
| ZNF799    | 90576  | 2588  | 0.31589825  | 1.980352299 | 0.816401705 | 0.938619148  |
| FAM171A2  | 284069 | 2634  | 0.310381425 | 0.169197179 | 0.320857648 | 0.768522638  |
| DLL4      | 54567  | 3420  | 0.23904815  | 0.260623023 | 0.43245419  | 0.118379452  |
| HSPC072   | 29075  | 1574  | 0.519405764 | 1.41570956  | 1.073874264 | 1.414687098  |
| GATM      | 2628   | 2602  | 0.314198567 | 0.171278005 | 0.162401815 | 0.311189643  |
| GAPDHS    | 26330  | 1492  | 0.547952193 | 0.149351665 | 0.708058852 | 0.135676182  |
| C1orf101  | 257044 | 3208  | 0.254845596 | 0.06946156  | 0.263447333 | 0.1893038    |
| AIM2      | 9447   | 1485  | 0.550535133 | 0.90033408  | 0.142279301 | 32.30682863  |
| PROS1     | 5627   | 3595  | 0.227411592 | 1.735553595 | 0.058771839 | 0.788318242  |
| TNFRSF1B  | 7133   | 3682  | 0.222038205 | 3.147012386 | 0.459065207 | 27.10413619  |
| C10orf128 | 170371 | 384   | 2.129022584 | 13.34674935 | 2.200882931 | 18.9777059   |
| NME9      | 347736 | 2133  | 0.383283953 | 0.417876577 | 0.396220837 | 1.518453731  |
| GAS1      | 2619   | 2844  | 0.287462965 | 0.391759291 | 0.074291407 | 0.0711177519 |
| TSPO2     | 222642 | 1021  | 0.800729356 | 0.654748339 | 0.620817124 | 0.396530584  |
| CAPN11    | 11131  | 2754  | 0.296857179 | 0.161824753 | 0.230157692 | 0.294014325  |
| SLC7A8    | 23428  | 4237  | 0.192953663 | 0.15777627  | 0.299199568 | 8.551986422  |
| CCDC102A  | 92922  | 2450  | 0.333691703 | 0.909521162 | 0.689909425 | 0.165248051  |
| TMEM139   | 135932 | 2400  | 0.340643613 | 0.278540856 | 0.088035317 | -            |
| SLC1A1    | 6505   | 3757  | 0.217605715 | 0.059311335 | 0.224950505 | 0.053880453  |
| ULK2      | 9706   | 9165  | 0.08920291  | 0.072940322 | 0.184427506 | 0.176697316  |
| TDGF1P3   | 6998   | 2710  | 0.301677001 | 0.164452166 | 0.23389457  | 0.149393995  |
| ALDH1A3   | 220    | 3510  | 0.23291871  | 0.444395668 | 0.421365621 | -            |
| TNXB      | 7148   | 13143 | 0.06220381  | 0.169544765 | 0.096455038 | 0.477462889  |
| RPP21     | 79897  | 585   | 1.39751226  | 1.142731717 | 0.722341064 | 0.692064489  |
| ADAMTS17  | 170691 | 6331  | 0.129133576 | 0.316773679 | 0.133492189 | 0.127896928  |
| ARHGAP10  | 79658  | 3073  | 0.266041221 | 0.072513077 | 0.481286472 | 0.329366845  |

|           |          |      |             |             |             |             |
|-----------|----------|------|-------------|-------------|-------------|-------------|
| C1orf200  | 644997   | 1840 | 0.444317757 | 1.69546608  | 0.688972048 | 1.320188237 |
| C2orf134  | 170487   | 2028 | 0.403128537 | -           | 0.104183807 | 0.299450981 |
| EGF       | 1950     | 5600 | 0.14599012  | -           | 0.075458843 | 0.180740056 |
| CDA       | 978      | 985  | 0.829994591 | 7.013008352 | 3.861041324 | 16.64643442 |
| LOC100128 | 1E+08    | 1371 | 0.596312671 | 0.487598873 | 0.462329894 | 0.7382526   |
| LINC00478 | 388815   | 3475 | 0.235264654 | 0.064124514 | 0.12160274  | -           |
| PRKY      | 5616     | 7240 | 0.112920535 | 0.030777995 | 0.029182978 | 0.111839151 |
| LOC440354 | 440354   | 3874 | 0.211033731 | 0.115040106 | 0.327235046 | 0.209012765 |
| MPL       | 4352     | 3645 | 0.224292091 | 0.672471751 | 0.173896923 | 0.333216235 |
| RHBDL2    | 54933    | 1838 | 0.444801236 | 0.242472998 | 1.034582618 | 0.660812393 |
| RXFP2     | 122042   | 2803 | 0.291667739 | 0.158995851 | 0.150756162 | 0.144437291 |
| C3orf72   | 401089   | 4075 | 0.200624459 | 0.546828674 | 0.41479217  | 0.794812713 |
| LTB       | 4050     | 894  | 0.914479499 | 1.744774936 | 3.545046332 | 1.585013468 |
| LOC38838  | 388387   | 1844 | 0.443353944 | 0.6042101   | 0.80205712  | 0.439108163 |
| AQPEP     | 206338   | 4630 | 0.176575523 | 0.192512039 | 0.228169289 | 0.786980461 |
| UPK1B     | 7348     | 2060 | 0.396866346 | 0.649027237 | 0.102565418 | 0.393065753 |
| AKAP12    | 9590     | 8450 | 0.096750849 | 0.079112196 | 0.050008228 | 0.215604706 |
| C5orf39   | 389289   | 1280 | 0.638706775 | 1.218616245 | 0.825331099 | 3.79554118  |
| LOC606724 | 606724   | 571  | 1.431777009 | 3.121999086 | 4.810336073 | 4.25419677  |
| ZBTB20    | 26137    | 3779 | 0.216338892 | 0.294830226 | 0.111820461 | 0.267833902 |
| HFM1      | 164045   | 4936 | 0.165628985 | 0.225721925 | 0.428048544 | 0.04101071  |
| KRT18     | 3875     | 1485 | 0.550535133 | 0.30011136  | 0.284558601 | 1.090525861 |
| ATP6V0D2  | 245972   | 2370 | 0.344955558 | -           | 0.178299377 | 0.256239067 |
| PCDHGB3   | 56102    | 4596 | 0.177881782 | 0.339388336 | 0.137914335 | 0.176178297 |
| ELOVL2    | 54898    | 4079 | 0.200427721 | 0.273146218 | 0.103596353 | 0.446643728 |
| FLJ31813  | 326332   | 2177 | 0.375537286 | 1.023576871 | 0.582319048 | 1.394778569 |
| CLIC2     | 1193     | 2702 | 0.302570197 | 0.494817213 | 0.547369848 | 1.048854212 |
| LOC285547 | 285547   | 2122 | 0.385270816 | 0.210021381 | 1.493530358 | 0.476976586 |
| HCG22     | 285834   | 5670 | 0.144187773 | 0.117900891 | 0.223581758 | 0.142806958 |
| HSPA12B   | 116835   | 3178 | 0.257251313 | 0.210351811 | 0.199450687 | 0.191090808 |
| YJEFN3    | 374887   | 1032 | 0.79219445  | 1.511462009 | 0.818933184 | 1.569215992 |
| MGC16703  | 113691   | 1964 | 0.416265108 | 0.567292986 | 0.860630393 | 0.618418115 |
| SLC24A3   | 57419    | 3905 | 0.209358431 | -           | 0.432849703 | 0.155515132 |
| GPNMB     | 10457    | 2775 | 0.294610693 | 0.481800399 | 1.370495749 | 6.127576392 |
| ELMOD1    | 55531    | 3006 | 0.271970949 | 0.074129303 | 0.492013749 | 0.404049627 |
| ALOX12P2  | 245      | 2768 | 0.295355734 | 0.6440251   | 0.534318399 | 0.511922703 |
| PRR15     | 222171   | 1717 | 0.476147159 | -           | 0.246109215 | -           |
| LRRTM2    | 26045    | 5628 | 0.145263801 | 0.039593583 | 0.075083426 | 0.107904511 |
| SMCR5     | 140771   | 2844 | 0.287462965 | 0.156703716 | -           | 0.071177519 |
| C1orf182  | 128229   | 764  | 1.070084649 | 0.583331635 | 0.829652204 | -           |
| ERVV-1    | 147664   | 2490 | 0.328331194 | 0.626437266 | 0.593973225 | 0.243890196 |
| SHC4      | 399694   | 4556 | 0.179443519 | 0.09781944  | 0.092750115 | 0.044431269 |
| FFAR2     | 2867     | 2069 | 0.395140006 | 13.35488299 | 1.02119266  | 105.6661054 |
| PRKCZ     | 5590     | 2359 | 0.346564083 | 1.133527858 | 0.268696178 | 1.28716954  |
| SEPT5-GP1 | 1.01E+08 | 4671 | 0.17502562  | 0.190822252 | 0.090466607 | 0.086674743 |
| BNIP1     | 149428   | 2412 | 0.338948869 | 0.646695188 | 0.963570636 | 0.755331578 |
| TRIM6     | 117854   | 3430 | 0.238351216 | 0.064965797 | 0.061599056 | 0.177051484 |
| RNF222    | 643904   | 3067 | 0.26656168  | 0.508584543 | 0.413338301 | 0.726024614 |
| C1QTNF6   | 114904   | 2954 | 0.276758521 | 0.905210635 | 0.35762485  | 0.479689249 |
| SCARNA10  | 692148   | 330  | 2.477408097 | 1.35050112  | -           | -           |
| IL22RA2   | 116379   | 2910 | 0.280943186 | 0.153149612 | 0.145212894 | 0.347815916 |
| TMEM54    | 113452   | 1063 | 0.769091884 | -           | 0.993813553 | 0.380863336 |
| MARVELD3  | 91862    | 2239 | 0.365138308 | 0.69666315  | 0.660559772 | 0.632872729 |
| SYNGR1    | 9145     | 4447 | 0.183841842 | -           | 1.092770297 | 0.09104064  |
| AMY2B     | 280      | 2215 | 0.36909466  | 0.905414972 | 0.190776308 | 0.822510053 |
| RPL17-C18 | 1.01E+08 | 2008 | 0.407143761 | 0.110972453 | -           | -           |
| CHGB      | 1114     | 2666 | 0.306655916 | 0.585082068 | 0.634012787 | 0.151859612 |
| LOC15738  | 157381   | 3595 | 0.227411592 | 0.247936228 | 0.411402873 | 0.168925338 |
| PDE6B     | 5158     | 3414 | 0.23946827  | 0.326351325 | 0.12377549  | 0.296468751 |
| NUP210L   | 91181    | 5913 | 0.138262248 | 0.113055649 | 0.214393467 | -           |
| AGAP4     | 119016   | 2431 | 0.336299742 | 0.45831486  | 0.260738085 | 0.416348957 |
| LOC728739 | 728739   | 622  | 1.314380502 | 0.716503809 | 2.038116669 | 0.325448333 |

|           |          |       |             |             |             |             |
|-----------|----------|-------|-------------|-------------|-------------|-------------|
| PPP1R13B  | 23368    | 4976  | 0.164297563 | 0.089562976 | 0.21230382  | 0.162724166 |
| C12orf39  | 80763    | 638   | 1.281417981 | 0.698535062 | 0.662334675 | -           |
| IFNA1     | 3439     | 876   | 0.933270174 | 0.254375211 | 0.24119265  | 2.772998123 |
| CMA1      | 1215     | 784   | 1.042786572 | -           | -           | -           |
| RDM1      | 201299   | 1166  | 0.701153235 | 0.191108649 | -           | -           |
| PVRIG     | 79037    | 1587  | 0.515151022 | 0.842467617 | 0.931942867 | 0.765326514 |
| MS4A6A    | 64231    | 1564  | 0.522726772 | 0.569904565 | 0.270185117 | 1.164871974 |
| UBQLNL    | 143630   | 2350  | 0.34789135  | 0.094822419 | 0.179816818 | 1.292099125 |
| PNPLA3    | 80339    | 2805  | 0.291459776 | 1.112177393 | 0.828567692 | 0.433002915 |
| HIST1H1D  | 3007     | 777   | 1.052181045 | 0.286785952 | 1.087695039 | -           |
| LIPH      | 200879   | 2478  | 0.329921175 | -           | 0.08526423  | 0.245071263 |
| PA2G4P4   | 647033   | 2751  | 0.297180906 | 0.243001837 | 0.153605788 | 0.220751214 |
| SERHL2    | 253190   | 1374  | 0.595010678 | 0.162178082 | 0.30754696  | -           |
| PLD4      | 122618   | 1964  | 0.416265108 | 4.765261079 | 1.290945589 | 4.638135862 |
| C1orf51   | 148523   | 1758  | 0.465042476 | 0.126753518 | 0.3605542   | 0.460588994 |
| OSMR      | 9180     | 5556  | 0.147146269 | 0.401066747 | 0.152112859 | 0.182171403 |
| AVPR2     | 554      | 1788  | 0.45723975  | 0.872387468 | 0.590841055 | 0.679291486 |
| LOC100610 | 1.01E+08 | 4374  | 0.186910076 | 0.152834489 | 0.193218803 | 0.185120131 |
| SEMA5A    | 9037     | 11825 | 0.06913697  | 0.056532605 | 0.089338165 | 0.03423744  |
| GRIA4     | 2893     | 5621  | 0.145444702 | 0.07928578  | 0.037588465 | 0.036012963 |
| ZNF257    | 113835   | 3534  | 0.231336919 | 0.4413777   | 0.418504055 | 0.40096266  |
| EGR3      | 1960     | 4342  | 0.18828758  | 10.57197905 | 0.194642802 | 22.37813317 |
| PRX       | 57716    | 5533  | 0.147757938 | 0.12082018  | 0.076372587 | 0.073171467 |
| ASAP3     | 55616    | 4199  | 0.19469985  | -           | 0.201271504 | 0.048208827 |
| C5orf43   | 643155   | 2895  | 0.28239885  | -           | 0.437895878 | 0.069923614 |
| CBWD5     | 220869   | 1572  | 0.520066585 | 0.992257502 | 0.806430387 | 0.515086165 |
| PCSK5     | 5125     | 9538  | 0.085714476 | 0.070087865 | 0.044303787 | 0.042446815 |
| KCNG2     | 26251    | 1401  | 0.583543663 | 0.318105189 | 0.754049826 | 0.577955355 |
| HMGB3P1   | 128872   | 888   | 0.920658415 | 0.752813124 | 0.47586658  | 1.139802156 |
| ZNF547    | 284306   | 2788  | 0.29323697  | 0.399628201 | 0.530485412 | 0.871286354 |
| UGT2B28   | 54490    | 1851  | 0.441677295 | 0.120385027 | 0.342438835 | 0.765533247 |
| RNF43     | 54894    | 4573  | 0.178776443 | 0.633462694 | 0.462026594 | 0.531193168 |
| TUBA3D    | 113457   | 1560  | 0.524067098 | 0.571365858 | 0.270877899 | -           |
| PLEKHA1   | 59338    | 3996  | 0.204590759 | 0.557639351 | 0.211496258 | 0.354605115 |
| PURG      | 29942    | 2709  | 0.301788362 | -           | -           | 0.074724571 |
| FBXO4     | 26272    | 1745  | 0.468506975 | 0.383093441 | 0.242160185 | 0.812035553 |
| C8orf86   | 389649   | 2250  | 0.363353188 | 0.495183744 | 0.375617354 | 0.359873534 |
| IL17RC    | 84818    | 2641  | 0.309558755 | 0.8437436   | 0.880019831 | 0.996431359 |
| MORN4     | 118812   | 2441  | 0.334922029 | 0.182574916 | 0.605896489 | 0.082928662 |
| BCAN      | 63827    | 3488  | 0.234387807 | 0.574969657 | 0.302873798 | 1.044644362 |
| NNAT      | 4826     | 1338  | 0.611019934 | 0.499624854 | 0.157910883 | 0.151292125 |
| TMPRSS11  | 132724   | 2645  | 0.309090613 | 0.50548057  | 0.239642451 | 0.382663257 |
| FAM131A   | 131408   | 2566  | 0.318606653 | 0.17368097  | 0.658721002 | 2.051110848 |
| UBE2Q2P3  | 1E+08    | 1223  | 0.668474793 | 0.911008523 | 0.69103765  | 0.827591427 |
| C11orf92  | 399948   | 5499  | 0.148671517 | 0.162089605 | 0.115267191 | 0.294495527 |
| LOC653653 | 653653   | 1160  | 0.70477989  | 1.728874278 | 0.910710178 | 4.886213933 |
| FAM151B   | 167555   | 1707  | 0.478936539 | 2.87189166  | 2.104183329 | 2.371750005 |
| OR7E156P  | 283491   | 2647  | 0.308857073 | 0.420915536 | 0.159640923 | 0.458848953 |
| IL20RB    | 53833    | 2171  | 0.37657516  | 0.821124587 | 0.973214009 | 0.466211108 |
| AGAP11    | 119385   | 3155  | 0.259126679 | 0.353142131 | 0.267872915 | 0.128322576 |
| S100Z     | 170591   | 1164  | 0.702357966 | 2.488681187 | 1.452128944 | 9.043213809 |
| C20orf166 | 253868   | 3610  | 0.226466668 | 0.432085538 | 0.234110539 | 0.448595818 |
| FAM95B1   | 1E+08    | 1543  | 0.529841006 | 0.577660881 | 0.821586888 | 0.262383491 |
| SRC       | 6714     | 4145  | 0.19723635  | 0.215037573 | 0.356813831 | 0.781390062 |
| CXCL16    | 58191    | 2344  | 0.348781857 | 0.760521108 | 0.45069275  | 1.468127419 |
| VWDE      | 221806   | 5583  | 0.146434654 | 0.199563572 | 0.037844306 | 0.03625808  |
| MRPL23-A  | 1E+08    | 1904  | 0.429382706 | 0.468135892 | 0.443875549 | 0.10631768  |
| FAM86B2   | 653333   | 1268  | 0.644751319 | -           | 0.166628361 | -           |
| TRIM68    | 55128    | 3321  | 0.246174246 | 0.201294205 | 0.063620825 | 0.243816758 |
| CHDH      | 55349    | 3711  | 0.220303064 | 0.1801396   | 0.284673621 | 0.109096666 |
| SYNPO     | 11346    | 5397  | 0.151481318 | 0.12386475  | 0.430634125 | 0.037507664 |
| TCF7L1    | 83439    | 2932  | 0.278835154 | 0.228000701 | 0.288246605 | 0.552329776 |

|           |          |      |             |             |             |   |             |
|-----------|----------|------|-------------|-------------|-------------|---|-------------|
| SIRPG     | 55423    | 1720 | 0.47531667  | 0.388661659 | 0.368519933 | - |             |
| SLC25A18  | 83733    | 2087 | 0.391731994 | 0.213543541 | 0.404954023 |   | 0.387980571 |
| IYD       | 389434   | 7531 | 0.108557253 | 0.088766174 | 0.140276697 |   | 0.134397067 |
| PBOV1     | 59351    | 2505 | 0.326365139 | 0.355820654 | 0.253035642 |   | 0.484859552 |
| TNIP3     | 79931    | 2429 | 0.336576646 | 0.183476892 | 0.173968515 |   | 0.250015063 |
| FLJ40852  | 285962   | 2262 | 0.361425585 | 0.689579484 | 0.560437033 |   | 0.805419879 |
| LAX1      | 54900    | 3298 | 0.247891047 | 0.27026402  | 0.128129024 |   | 0.306896396 |
| LOC44213  | 442132   | 2070 | 0.394949117 | 0.86118912  | 0.408279732 |   | 0.391166885 |
| NYNRIN    | 57523    | 7857 | 0.104053032 | -           | 0.026891277 |   | 0.025764142 |
| P2RY11    | 5032     | 1977 | 0.413527907 | 0.33813761  | 0.427485607 |   | 0.204783878 |
| GUSBP4    | 375513   | 770  | 1.061746327 | 2.604537874 | 1.097583176 |   | 0.262894627 |
| SASH1     | 23328    | 7709 | 0.106050677 | 0.14452762  | 0.191852812 |   | 0.078776312 |
| OLFML2B   | 25903    | 3240 | 0.252328603 | 0.06877552  | 0.391268077 |   | 0.437346309 |
| SMAD7     | 4092     | 3088 | 0.264748922 | 1.010251809 | 0.615791079 |   | 0.721087271 |
| ARHGEF26  | 26084    | 5181 | 0.157796694 | 0.08601918  | 0.122342074 |   | 0.039071388 |
| TMEM31    | 203562   | 732  | 1.116864306 | 0.608832472 | 0.865921153 | - |             |
| BRSK1     | 84446    | 3109 | 0.262960654 | 0.573387417 | 0.271836296 |   | 0.976659036 |
| NEGR1     | 257194   | 5669 | 0.144213207 | 0.078614459 | 0.111810599 | - |             |
| LOC10050  | 1.01E+08 | 1257 | 0.650393534 | 0.53182025  | 1.344692196 |   | 0.161041259 |
| TCN1      | 6947     | 1577 | 0.518417674 | -           | -           | - |             |
| SLC9A5    | 6553     | 3745 | 0.218302983 | 0.238005538 | 0.16925348  |   | 0.162159303 |
| ST6GALNA  | 10610    | 2105 | 0.388382267 | 0.317576273 | 0.401491233 |   | 0.288497192 |
| MX1       | 4599     | 3409 | 0.239819499 | 0.392195984 | 0.185935548 |   | 8.61020391  |
| TSPAN10   | 83882    | 1613 | 0.506847286 | 0.276295951 | 0.523954771 |   | 0.878488556 |
| SCARNA16  | 677781   | 187  | 4.371896643 | 7.14971181  | 2.259730068 |   | 1.082507289 |
| LOC64869  | 648691   | 3105 | 0.263299411 | 0.21529728  | 0.408279732 |   | 0.065194481 |
| MYOZ3     | 91977    | 3831 | 0.21340242  | 0.174497012 | 0.165454003 |   | 0.211358771 |
| MCF2L     | 23263    | 5406 | 0.151229129 | 0.041219513 | 0.23450029  |   | 0.149780883 |
| POU5F1P4  | 645682   | 1083 | 0.754888894 | 0.411510036 | 0.585276347 | - |             |
| ZDHHC8P1  | 150244   | 2548 | 0.320857407 | 0.174907916 | 0.248765418 |   | 0.079446179 |
| C19orf73  | 55150    | 765  | 1.068685846 | 0.291284555 | 0.828567692 | - |             |
| HOXC13    | 3229     | 2435 | 0.335747299 | 0.183024792 | 0.433849613 |   | 1.246995049 |
| ZG16B     | 124220   | 846  | 0.966364861 | 0.263395608 | 0.499491162 |   | 2.153498542 |
| KCNJ13    | 3769     | 3609 | 0.226529419 | 0.246974436 | 0.292719259 |   | 0.168270044 |
| HIST2H2BE | 8349     | 2223 | 0.367766384 | 0.400958497 | 0.855403892 |   | 4.553055847 |
| PIGR      | 5284     | 4295 | 0.190348003 | 0.155645647 | 0.19677277  |   | 0.047131284 |
| LY6K      | 54742    | 1994 | 0.410002343 | -           | 0.317880784 | - |             |
| TSPAN13   | 27075    | 1912 | 0.427586126 | 0.349632874 | 0.221009165 |   | 0.105872836 |
| LOC10012  | 1E+08    | 1718 | 0.475870007 | 0.64852353  | 0.614914905 |   | 0.235656418 |
| APOBEC3A  | 200315   | 1444 | 0.56616667  | 0.462948791 | 0.292638174 |   | 5.607447727 |
| LOC44070  | 440700   | 1216 | 0.672322921 | 0.366501126 | 0.347507831 |   | 0.166471104 |
| C12orf71  | 728858   | 966  | 0.846319536 | -           | 0.43744257  |   | 0.419107377 |
| LOC10050  | 1.01E+08 | 2124 | 0.384908038 | 0.10491181  | 0.198949869 |   | 0.190610982 |
| H1FX-AS1  | 339942   | 2211 | 0.369762403 | 0.604701994 | 0.860046518 |   | 0.183110686 |
| STOX2     | 56977    | 4654 | 0.175664949 | 0.095759641 | 0.363188245 |   | 0.347965385 |
| C4orf26   | 152816   | 1926 | 0.424478023 | 0.231394273 | 0.767909309 |   | 0.630619511 |
| C19orf77  | 284422   | 908  | 0.900379595 | 1.227052229 | 0.698077405 | - |             |
| LRRC69    | 1E+08    | 1323 | 0.617947598 | 0.673719379 | 0.319402512 |   | 0.153007455 |
| MYBPC3    | 4607     | 4217 | 0.193868786 | 0.317049113 | 0.100206195 |   | 1.536097608 |
| FAM129C   | 199786   | 2523 | 0.324036731 | 0.17664105  | 0.251230394 |   | 0.240700194 |
| CMTM8     | 152189   | 1185 | 0.689911116 | 0.18804446  | 0.53489813  | - |             |
| FAM18A    | 780776   | 3339 | 0.244847161 | 0.533890829 | 0.253111424 |   | 0.545630358 |
| TAX1BP3   | 30851    | 1398 | 0.584795903 | 0.318787818 | 0.302267184 |   | 0.144798901 |
| LOC10012  | 1E+08    | 463  | 1.324316424 | 0.962560193 | 0.456338577 | - |             |
| ILDR1     | 286676   | 2908 | 0.210852305 | 0.076627471 | 0.072656383 |   | 0.626499232 |
| ANGPT1    | 284      | 4338 | 0.141345898 | -           | 0.097411139 |   | 0.139992298 |
| LOC73022  | 730227   | 2741 | 0.223698834 | 0.325184509 | 0.077083094 |   | 0.147704387 |
| LINC00466 | 199899   | 1793 | 0.34197351  | 0.124279244 | -           |   | 0.225799066 |
| TMEM93    | 83460    | 805  | 0.761687583 | 1.107243154 | 1.049862168 |   | 1.005857704 |
| LOC10029  | 1E+08    | 2244 | 0.27324354  | 0.397206212 | 0.470777098 |   | 0.721671526 |
| PCDHGA11  | 56105    | 4872 | 0.125853552 | 0.045737415 | 0.043367151 |   | 0.083098876 |
| POPDC2    | 64091    | 1667 | 0.367821538 | 0.668364381 | 0.887218554 |   | 0.607165156 |



|           |        |       |             |             |             |             |
|-----------|--------|-------|-------------|-------------|-------------|-------------|
| NLRP8     | 126205 | 3934  | 0.155861338 | 0.226571108 | 0.053707362 | 0.257281219 |
| FLJ13224  | 79857  | 1630  | 0.376170861 | 0.136707169 | 0.518490212 | 0.248378973 |
| HIST2H2BC | 337873 | 582   | 1.053536949 | 1.148622086 | 2.178193416 | 1.391263663 |
| CELF4     | 56853  | 4070  | 0.150653195 | 0.054750045 | 0.207650871 | 0.049736821 |
| SH2D4B    | 387694 | 3983  | 0.153943888 | 0.167837824 | 0.212186554 | 0.304939286 |
| REP15     | 387849 | 1139  | 0.538330557 | 0.391277761 | 0.185500229 | -           |
| TEKT4P2   | 1E+08  | 1640  | 0.373877137 | 0.543494353 | 0.386496515 | 0.370296701 |
| CPB2      | 1361   | 1766  | 0.347201871 | -           | 0.23928059  | -           |
| SGCB      | 6443   | 4295  | 0.142761002 | 0.415055059 | 0.344352347 | 0.047131284 |
| NFATC1    | 4772   | 4762  | 0.128760711 | -           | 0.221844563 | 0.085018422 |
| VSTM2L    | 128434 | 2018  | 0.30384465  | 0.11042254  | 0.10470008  | 0.100311627 |
| CD3D      | 915    | 771   | 0.795276918 | -           | 3.836558572 | 1.837875539 |
| ILDR2     | 387597 | 8127  | 0.07544709  | 0.164512872 | 0.051995758 | 0.074724571 |
| SERPINB9  | 5272   | 4159  | 0.147429311 | 0.214313715 | 0.152405454 | 0.243362422 |
| ANKRD63   | 1E+08  | 1143  | 0.536446635 | 0.974771149 | 0.554553179 | -           |
| PTPRO     | 5800   | 6379  | 0.096121415 | 0.41918674  | 0.132487701 | 7.679539871 |
| TXK       | 7294   | 2914  | 0.210418155 | -           | 0.362533908 | 0.416806169 |
| SLC5A4    | 6527   | 2029  | 0.30219739  | -           | -           | -           |
| CCDC120   | 90060  | 4056  | 0.151173201 | 0.164817075 | 0.312551422 | 0.199633987 |
| INGX      | 27160  | 1228  | 0.499314743 | 0.362919682 | 1.204391962 | 0.659377404 |
| FGF18     | 8817   | 1999  | 0.306732618 | -           | 0.528476141 | 0.101265064 |
| C2orf65   | 130951 | 2558  | 0.239702308 | 0.69689659  | 0.330390557 | 0.316542397 |
| FAM153C   | 653316 | 1077  | 0.569320802 | 0.827605143 | 0.78471592  | 1.315693631 |
| RASL10A   | 10633  | 1813  | 0.33820105  | 0.368724795 | 0.116538754 | 0.111654089 |
| SHROOM4   | 57477  | 9571  | 0.064064205 | 0.046564138 | 0.110377579 | 0.042300462 |
| AOC4      | 90586  | 2073  | 0.295783166 | 0.107492853 | -           | 0.195300398 |
| PPP4R1L   | 55370  | 2398  | 0.25569579  | 0.092924389 | 0.616761188 | 0.42207853  |
| CARNS1    | 57571  | 3983  | 0.153943888 | -           | 0.106093277 | 0.050823214 |
| WWC1      | 23286  | 6753  | 0.090797942 | 0.032997584 | 0.062575081 | 0.029976138 |
| APOM      | 55937  | 790   | 0.776150005 | 1.692400137 | 2.407041585 | 0.768717201 |
| CALCRL    | 10203  | 5006  | 0.122484719 | 0.044513121 | 0.084412609 | 0.202186239 |
| LOC65371  | 653712 | 1104  | 0.555397196 | 0.8073648   | 1.531048995 | 0.366718955 |
| HRASLS5   | 117245 | 3127  | 0.196085227 | 0.213782557 | 0.878382442 | 0.712093858 |
| ZG16      | 653808 | 1806  | 0.339511907 | 0.493538615 | 0.350971364 | 0.560434283 |
| SLC4A3    | 6508   | 4255  | 0.144103056 | 0.261848043 | 0.049655643 | 0.237871754 |
| PKDREJ    | 10343  | 7660  | 0.080046802 | 0.087271286 | 0.055165734 | 0.105706978 |
| CYP2F1    | 1572   | 1826  | 0.335793266 | 0.488132935 | 0.809963488 | 0.33257754  |
| ZNF132    | 7691   | 3048  | 0.201167488 | 0.146215672 | 0.207957442 | -           |
| BRWD1-IT  | 257357 | 1028  | 0.596457689 | -           | -           | -           |
| C14orf132 | 56967  | 7504  | 0.081710888 | 0.178171123 | 0.05631257  | 0.134880639 |
| ALDH1A2   | 8854   | 3703  | 0.165584257 | 0.120352517 | 0.114115453 | 1.639985387 |
| LOC100379 | 1E+08  | 3361  | 0.182433354 | 0.464096636 | 0.25145464  | 0.301143801 |
| THNSL1    | 79896  | 3787  | 0.161911409 | 0.23536592  | 0.278960604 | 0.213814484 |
| LOC100128 | 1E+08  | 3031  | 0.202295778 | -           | 0.139415877 | 0.133572328 |
| SNAI1     | 6615   | 1722  | 0.356073463 | -           | 0.122697306 | 0.352663524 |
| LOC100132 | 1E+08  | 2445  | 0.250780574 | 0.182276225 | 0.259245106 | 0.082792991 |
| FLJ40292  | 643210 | 1761  | 0.34818768  | 0.126537584 | -           | 0.114951086 |
| RSPH4A    | 345895 | 2858  | 0.214541114 | 0.155936098 | -           | 0.354144267 |
| CCR10     | 2826   | 1244  | 0.492892688 | 0.537377857 | 1.18890139  | 0.488172499 |
| SMC1B     | 27127  | 4266  | 0.143731482 | -           | 0.198110419 | 0.047451679 |
| RPL19P12  | 1E+08  | 1134  | 0.540704148 | 0.196501486 | 0.372636263 | 0.178508697 |
| ZNF491    | 126069 | 2823  | 0.217201029 | 0.236804128 | 0.449064317 | 0.286828003 |
| RAD9B     | 144715 | 1898  | 0.32305506  | 0.469615774 | 0.445278738 | 0.106653774 |
| CARD10    | 29775  | 3912  | 0.156737859 | 0.341767921 | 0.540093971 | 0.517456194 |
| ZSCAN12P  | 221584 | 3739  | 0.163989972 | 0.3575812   | 0.452066887 | 1.136936647 |
| TEX21P    | 441687 | 1062  | 0.577362057 | -           | 0.198949869 | 0.381221964 |
| AKAP6     | 9472   | 10411 | 0.058895255 | 0.149825069 | 0.020294377 | 0.019443748 |
| ARTN      | 9048   | 1961  | 0.312676443 | 0.227264339 | 0.646460259 | 0.309682095 |
| HIST1H4E  | 8367   | 377   | 1.62641513  | 1.773204388 | 1.681311098 | 0.536946586 |
| GIMAP1    | 170575 | 4430  | 0.138410498 | 0.553309149 | 0.143082231 | 0.959595061 |
| FSTL1     | 11167  | 3840  | 0.159676694 | 0.174088035 | 0.055022073 | 0.527158497 |
| C21orf67  | 84536  | 1850  | 0.331437029 | 0.843150699 | 0.799455854 | 2.735525175 |

|           |          |       |             |             |             |             |
|-----------|----------|-------|-------------|-------------|-------------|-------------|
| LOC646329 | 646329   | 2228  | 0.275205792 | 0.40005868  | 0.094831581 | 0.726854086 |
| MSTN      | 2660     | 2823  | 0.217201029 | 0.394673547 | 0.224532159 | 0.501949005 |
| LOC645752 | 645752   | 3117  | 0.19671431  | 0.071489472 | 0.067784652 | 0.45460444  |
| NCCRP1    | 342897   | 1973  | 0.310774711 | 0.903528372 | 0.321264209 | 0.4103981   |
| PRND      | 23627    | 4047  | 0.151509391 | 0.055061202 | 0.104415499 | 0.300116921 |
| ASZ1      | 136991   | 3000  | 0.204386168 | -           | 0.070428254 | -           |
| APOE      | 348      | 1223  | 0.501356095 | 0.546605114 | 0.172759412 | 0.827591427 |
| CD79A     | 973      | 1258  | 0.487407396 | 11.51361249 | 2.351340746 | 31.86082263 |
| FAM154B   | 283726   | 3146  | 0.194900987 | 0.070830478 | 0.201479429 | -           |
| FCGR2C    | 9103     | 1510  | 0.406065235 | 0.737856572 | 1.39923683  | 18.0979447  |
| LILRA5    | 353514   | 1365  | 0.449200369 | 5.387163807 | 0.464362113 | 45.23135766 |
| POM121L4  | 266697   | 2167  | 0.282952701 | 0.616980207 | 0.487505218 | 0.467071673 |
| PCDHGA4   | 56111    | 4602  | 0.133237398 | -           | 0.137734525 | 0.131961449 |
| SEZ6      | 124925   | 4250  | 0.144272589 | 0.10486244  | 0.049714061 | 0.285781924 |
| HOXB8     | 3218     | 1834  | 0.334328519 | -           | 0.460817364 | -           |
| SLC30A8   | 169026   | 5561  | 0.110260475 | 0.080141228 | 0.113982069 | 0.182007609 |
| IL5RA     | 3568     | 2415  | 0.253895861 | -           | 2.974609477 | 0.670571803 |
| C9orf131  | 138724   | 3406  | 0.180023049 | 0.130847143 | 0.124066213 | 0.118866038 |
| QRICH2    | 84074    | 5411  | 0.11331704  | 0.370632815 | 0.234283602 | 0.523748675 |
| LY9       | 4063     | 2486  | 0.246644611 | -           | 0.339959391 | -           |
| KCNK2     | 3776     | 3597  | 0.17046386  | 0.247798371 | 0.058739161 | 0.056277137 |
| HLA-DOA   | 3111     | 3485  | 0.175942182 | 0.127881024 | 0.060626904 | 0.174257271 |
| DNAJA4    | 55466    | 3203  | 0.191432565 | 0.069569992 | 0.131929292 | 0.12639954  |
| LOC643201 | 643201   | 4307  | 0.142363247 | 0.155211993 | 0.147168397 | -           |
| LOC100501 | 1.01E+08 | 2048  | 0.299393801 | 0.435220087 | 0.825331099 | 0.395368873 |
| TAF7L     | 54457    | 2371  | 0.258607551 | 0.281947724 | 0.267336265 | 0.170753997 |
| PROC      | 5624     | 1790  | 0.34254665  | -           | 0.590180898 | 0.226177501 |
| TIGD3     | 220359   | 1980  | 0.309676012 | -           | 0.640256853 | 0.511183997 |
| MAPK8IP1  | 9479     | 3234  | 0.189597558 | -           | 0.195996996 | 0.250375835 |
| LOC100501 | 1.01E+08 | 702   | 0.873445163 | 2.539403815 | 2.407803548 | 0.865080611 |
| HIST2H3D  | 653604   | 457   | 1.34170351  | -           | -           | 0.88590312  |
| ANKRD36B  | 645784   | 1753  | 0.349776671 | -           | 0.241055061 | 0.115475678 |
| MS4A4A    | 51338    | 1619  | 0.378726686 | 0.825816003 | -           | 11.0029277  |
| VWA2      | 340706   | 2946  | 0.208132554 | -           | -           | -           |
| VASH2     | 79805    | 4337  | 0.141378488 | 0.051379452 | 0.0487168   | 0.186699436 |
| FRMD6     | 122786   | 5050  | 0.121417526 | 0.132375852 | 0.083677133 | 0.320679387 |
| H3F3C     | 440093   | 1071  | 0.572510275 | 0.416120793 | 1.183668131 | 1.323064464 |
| SERPINA10 | 51156    | 2467  | 0.248544185 | 0.451626844 | 0.256933232 | 0.328218667 |
| C12orf59  | 120939   | 2800  | 0.21898518  | 0.079583102 | 0.603670747 | 1.951992607 |
| SCARNA17  | 677769   | 421   | 1.456433501 | 0.529293788 | 1.505592124 | 0.961657306 |
| SCARF1    | 8578     | 3864  | 0.158684913 | 0.692026971 | 0.164040964 | 2.095536884 |
| SEPP1     | 6414     | 2252  | 0.27227287  | 0.395795177 | 0.46910471  | 0.539330896 |
| STXBPL    | 9515     | 9382  | 0.065354776 | 0.047502171 | 0.090080904 | 0.043152603 |
| PLXDC1    | 57125    | 6271  | 0.097776831 | 0.177669179 | 0.101077067 | 0.161400784 |
| TGFB2     | 7042     | 5966  | 0.102775478 | -           | 0.070829622 | -           |
| SLAMF8    | 56833    | 3316  | 0.184909078 | 0.739191656 | -           | 4.029042508 |
| MIAT      | 440823   | 10193 | 0.060154862 | 0.065584034 | -           | 0.059578788 |
| PRR19     | 284338   | 1532  | 0.400234011 | 0.145452144 | 0.689571675 | 0.132133723 |
| DCDC2     | 51473    | 4708  | 0.130237575 | 0.047330647 | 0.044877817 | 0.042996785 |
| CBLN3     | 643866   | 2360  | 0.259812925 | 0.094420629 | 0.447637206 | 0.42887471  |
| MARCO     | 8685     | 1853  | 0.330900434 | 0.481020366 | 0.456092307 | 2.73109637  |
| AKR1D1    | 6718     | 2710  | 0.226257751 | 0.164452166 | 0.155929713 | 0.29878799  |
| ANKRD30B  | 554226   | 1437  | 0.426693461 | -           | 0.147031845 | 0.140869077 |
| SARDH     | 1757     | 3398  | 0.180446882 | 0.1967328   | 0.746149834 | 0.119145888 |
| EHD2      | 30846    | 3601  | 0.170274508 | 0.247523116 | 0.117347826 | 0.168643874 |
| SLFN1     | 200172   | 2133  | 0.287462965 | -           | 0.297165628 | 0.094903358 |
| ANKRD6    | 22881    | 5207  | 0.117756578 | 0.256768986 | 0.081154124 | 0.077752588 |
| C12orf70  | 341346   | 1272  | 0.482042849 | 0.350365857 | 0.166104372 | 1.273137503 |
| C11orf96  | 387763   | 1361  | 0.450520576 | 0.163727175 | 0.46572688  | -           |
| PCP4L1    | 654790   | 1480  | 0.414296287 | 0.752813124 | 0.142759974 | 0.957433811 |
| TNRC6C    | 57690    | 9794  | 0.062605524 | 0.682558765 | 0.08629151  | 0.516716518 |
| C7orf58   | 79974    | 5339  | 0.114845197 | 0.041736783 | 0.237443073 | 0.075830254 |

|          |        |       |             |             |             |             |
|----------|--------|-------|-------------|-------------|-------------|-------------|
| C8orf77  | 286103 | 3250  | 0.188664155 | 0.137127806 | 0.130021392 | 0.560572236 |
| IL37     | 27178  | 787   | 0.779108646 | 0.283141912 | 0.536937132 | 0.257215836 |
| PTCD1    | 26024  | 5505  | 0.111382108 | 0.08095647  | 0.03838052  | 0.073543638 |
| TES      | 26136  | 2799  | 0.219063417 | 0.238834603 | 0.377429013 | 0.361609259 |
| DSCR6    | 53820  | 2260  | 0.271309073 | 0.295795599 | 0.186977665 | 0.26871088  |
| CCDC80   | 151887 | 4578  | 0.13393589  | -           | 0.046152198 | -           |
| C11orf71 | 54494  | 680   | 0.901703683 | 1.966170748 | -           | 2.381516035 |
| KIRREL2  | 84063  | 2993  | 0.204864184 | 0.223353844 | 0.211778912 | -           |
| LOC10013 | 1E+08  | 2069  | 0.296355004 | 0.430802677 | 0.714834862 | 0.489194932 |
| FST      | 10468  | 2098  | 0.292258582 | -           | 0.402830813 | 0.096486589 |
| EPHA10   | 284656 | 2082  | 0.294504565 | 0.64216912  | 0.608889802 | 0.583368481 |
| COL6A4P2 | 646300 | 9161  | 0.066931394 | 0.097296227 | 0.069190512 | 0.022096809 |
| WDR88    | 126248 | 1724  | 0.355660385 | 0.387759892 | 0.245109932 | 0.58709067  |
| AKR7A3   | 22977  | 1301  | 0.471297851 | 0.513834016 | 0.32480363  | 0.466784465 |
| ROCK1P1  | 727758 | 2479  | 0.247341067 | -           | 0.17045967  | 0.081657468 |
| SLC13A4  | 26266  | 2908  | 0.210852305 | 0.229882412 | 0.50859468  | 0.348055129 |
| DDX43    | 55510  | 2707  | 0.226508498 | 0.740854881 | 0.234153781 | 0.224339338 |
| SLC16A12 | 387700 | 4622  | 0.132660862 | -           | 0.091425686 | 0.087593623 |
| CHAC1    | 79094  | 1578  | 0.388566859 | -           | -           | 0.384845747 |
| LPP-AS2  | 339929 | 2897  | 0.211652918 | 0.846102704 | 0.291729046 | 0.559002728 |
| GGN      | 199720 | 2168  | 0.282822188 | 0.205565207 | 0.097456071 | 0.28011374  |
| GVINP1   | 387751 | 8741  | 0.070147409 | 0.331406578 | 0.096686769 | 1.320037203 |
| TMCC3    | 57458  | 5867  | 0.104509716 | 0.303845488 | 0.144049607 | 2.691230835 |
| FAM20A   | 54757  | 4285  | 0.143094167 | 0.104005921 | -           | 0.1889651   |
| SULT1A2  | 6799   | 1348  | 0.454865359 | 0.165306146 | 0.783697186 | 0.15016978  |
| CDHR5    | 53841  | 3489  | 0.175740471 | 0.127734414 | 0.121114796 | 0.058019164 |
| DBIL5P   | 1E+08  | 2677  | 0.229046882 | 0.416198515 | 0.31570379  | 0.151235609 |
| FLNC     | 2318   | 9149  | 0.067019183 | 0.024355961 | 0.092375019 | 0.022125791 |
| C21orf96 | 80215  | 1502  | 0.408228032 | 0.741786567 | 0.562675796 | 0.539091513 |
| MBLAC1   | 255374 | 1518  | 0.403925233 | 0.4403808   | 0.139186272 | 0.133352347 |
| CKMT2    | 1160   | 1650  | 0.371611215 | 0.270100224 | -           | -           |
| ABCC6    | 368    | 5125  | 0.119640684 | 0.173918193 | 0.16490518  | 0.276488203 |
| ECM2     | 1842   | 3307  | 0.185412308 | 0.404292745 | 0.447231125 | 0.244848942 |
| TTC39B   | 158219 | 3276  | 0.187166821 | 0.068019745 | 0.128989476 | 0.370748833 |
| FOXF2    | 2295   | 2187  | 0.280365114 | -           | -           | -           |
| TEX15    | 56154  | 10155 | 0.060379961 | 0.043886299 | 0.041611967 | 0.019933911 |
| SPATA9   | 83890  | 1243  | 0.493289223 | 2.151240722 | 0.849898477 | 2.76853634  |
| PNMT     | 5409   | 1177  | 0.520950301 | -           | 1.615601404 | 0.171987139 |
| TMEM178  | 130733 | 1703  | 0.360046098 | 0.261694286 | 0.124066213 | 0.118866038 |
| NCR3     | 259197 | 1109  | 0.552893151 | 0.803724742 | 1.14310962  | 0.547598367 |
| DNM3     | 26052  | 7659  | 0.080057253 | 0.145471135 | 0.137932342 | 0.132150975 |
| C19orf71 | 1E+08  | 671   | 0.913798069 | 2.324633075 | 1.259521677 | 5.430282464 |
| MAP1LC3C | 440738 | 1192  | 0.514394718 | 0.560820515 | 0.53175695  | 0.169822872 |
| PIP5KL1  | 138429 | 1575  | 0.389306987 | 0.707405348 | 0.402447164 | 0.385578787 |
| RNFT2    | 84900  | 2914  | 0.210418155 | 0.382348464 | 0.217520345 | -           |
| KIAA0040 | 9674   | 4721  | 0.129878946 | -           | 0.089508478 | 0.171513546 |
| SIGLEC14 | 1E+08  | 2113  | 0.290183864 | 0.632747803 | 1.09992067  | 12.16680814 |
| LTBP3    | 4054   | 4721  | 0.129878946 | 0.188801258 | 0.313279672 | 0.600297412 |
| CIB3     | 117286 | 661   | 0.927622548 | -           | -           | 0.306246389 |
| CNKSRI1  | 10256  | 2564  | 0.239141382 | 0.434541117 | 0.494426119 | 0.157900829 |
| KANK4    | 163782 | 5477  | 0.111951525 | 0.122055515 | 0.19288366  | 0.36959807  |
| ROM1     | 6094   | 1894  | 0.323737331 | 0.470607571 | 0.223109568 | 0.320637059 |
| STAP2    | 55620  | 1557  | 0.393807646 | 0.143116689 | 0.678499555 | 0.52004846  |
| SPTA1    | 6708   | 8017  | 0.076482288 | 0.083385064 | 0.079063775 | 0.100999807 |
| LOC10013 | 1E+08  | 1613  | 0.380135464 | 0.138147976 | 0.392966078 | 0.125498365 |
| LRR2     | 79442  | 5108  | 0.120038861 | 0.261745518 | 0.289544505 | 0.356667926 |
| GP2      | 2813   | 2448  | 0.250473245 | 0.455132118 | 0.258927404 | 0.413457645 |
| CYP3A4   | 1576   | 2792  | 0.219612645 | -           | 0.151350116 | -           |
| BCRP3    | 644165 | 1428  | 0.429382706 | 0.468135892 | 0.591834065 | 0.42527072  |
| ZNF658   | 26149  | 4025  | 0.152337517 | 0.055362158 | 0.104986217 | 0.10058577  |
| UBE2Q2P2 | 1E+08  | 1610  | 0.380843791 | 0.276810788 | 0.131232771 | 0.377196639 |
| HR       | 55806  | 5528  | 0.110918687 | -           | 0.038220832 | 0.036618825 |

|           |          |       |             |             |             |             |
|-----------|----------|-------|-------------|-------------|-------------|-------------|
| TMEM185   | 79134    | 5938  | 0.103260105 | 0.112579666 | 0.106745417 | 0.170452057 |
| FAM46B    | 115572   | 2391  | 0.256444376 | 0.65237507  | 0.618566846 | 0.677302762 |
| PPARGC1A  | 10891    | 6318  | 0.097049463 | -           | 0.033441716 | 0.032040023 |
| FAM53A    | 152877   | 2807  | 0.218439082 | 0.31753856  | 0.376353333 | 0.288462933 |
| IL23A     | 51561    | 1049  | 0.584517163 | 0.424847826 | 0.805661626 | 2.894597659 |
| GFRA3     | 2676     | 1980  | 0.309676012 | -           | 0.106709475 | 0.204473599 |
| LOC400450 | 400456   | 1445  | 0.424331145 | 0.15420947  | -           | -           |
| MRS2P2    | 729633   | 2692  | 0.227770618 | 0.579431201 | 0.470917002 | 0.225589372 |
| FUT9      | 10690    | 12815 | 0.047846938 | 0.017388426 | 0.065949204 | 0.047388731 |
| LINC00167 | 440072   | 2863  | 0.214166435 | 0.155663769 | 0.442790279 | 0.212115469 |
| MYEOV     | 26579    | 2305  | 0.266012366 | 2.223493167 | 0.183327342 | 16.68611018 |
| FAM59A    | 64762    | 7051  | 0.086960503 | 0.03160299  | -           | -           |
| ALPP      | 250      | 2883  | 0.212680716 | -           | 0.219859273 | 0.210643978 |
| SEMA6A    | 57556    | 6860  | 0.089381706 | 0.259863189 | 0.153997639 | 0.206560064 |
| SEC14L2   | 23541    | 4303  | 0.142495585 | 0.10357085  | 0.147305202 | 0.470436586 |
| PLA2G2D   | 26279    | 2747  | 0.223210231 | 0.324474241 | -           | 0.073690886 |
| LEAP2     | 116842   | 707   | 0.86726804  | 1.260722403 | 1.793081426 | 0.286320881 |
| KCNMB4    | 27345    | 1631  | 0.375940223 | -           | 0.388629236 | -           |
| TDRKH     | 11022    | 2854  | 0.214841802 | 0.468463948 | 0.074031101 | 0.354640615 |
| PIP5K1B   | 8395     | 2654  | 0.23103184  | -           | 0.159219865 | 0.152546242 |
| LOC148709 | 148709   | 2321  | 0.264178589 | 0.192014377 | 1.09238136  | 0.348864908 |
| UGT2A3    | 79799    | 3069  | 0.199790976 | 0.435645522 | 0.619603406 | 1.121306833 |
| GRM6      | 2916     | 6143  | 0.099814179 | 0.217645468 | 0.103183182 | 0.230669386 |
| TSPAN11   | 441631   | 5562  | 0.110240652 | 0.120190229 | 0.037987192 | 0.036394977 |
| NCRUPAR   | 1E+08    | 924   | 0.663591455 | 0.482321828 | 0.685989485 | 0.438157712 |
| ATP1A4    | 480      | 3912  | 0.156737859 | -           | 0.108018794 | -           |
| C1QL3     | 389941   | 2493  | 0.245952067 | 0.268150042 | -           | -           |
| ADAMTS5   | 11096    | 9663  | 0.063454259 | -           | -           | -           |
| SLCO5A1   | 81796    | 3806  | 0.161103128 | 4.039793812 | 0.277568    | 5.584611301 |
| WDR96     | 80217    | 5365  | 0.114288631 | -           | 0.118146185 | -           |
| LOC400550 | 400550   | 3099  | 0.197856891 | 0.071904706 | 0.204535103 | 0.130641409 |
| RND2      | 8153     | 4169  | 0.147075679 | 0.21379965  | 0.050679962 | 0.242778679 |
| LMOD1     | 25802    | 3967  | 0.154564786 | 0.056171587 | 0.10652118  | 0.102056397 |
| SLCO1A2   | 6579     | 7695  | 0.079682717 | 0.086874341 | 0.054914818 | 0.10522618  |
| HIST1H3H  | 8357     | 473   | 1.296318191 | -           | 0.446690827 | 0.855935996 |
| TNNI1     | 7135     | 6162  | 0.099506411 | 0.108487188 | 0.102865025 | 0.098553487 |
| LOC158435 | 158435   | 2464  | 0.248846796 | -           | -           | 0.164309142 |
| NPEPL1    | 79716    | 2217  | 0.276571269 | 0.402043635 | 0.857718923 | -           |
| FGB       | 2244     | 3628  | 0.169007305 | 0.368521529 | 0.407660785 | 0.44637015  |
| LOC283688 | 283688   | 2922  | 0.209842062 | 0.07626033  | -           | 0.277110011 |
| GTF2H2C   | 728340   | 2106  | 0.291148388 | 0.423233969 | -           | 0.288360204 |
| ADCY1     | 107      | 12499 | 0.049056605 | 0.053484123 | 0.016904133 | 0.016195605 |
| LINC00173 | 1E+08    | 1597  | 0.38394396  | 0.139532051 | 0.13230104  | -           |
| AMDHD1    | 144193   | 2143  | 0.28612156  | -           | 0.492964912 | 0.377842021 |
| SEMA3A    | 10371    | 5672  | 0.108102698 | 0.117859318 | -           | 0.142756603 |
| PEX5L     | 51555    | 3577  | 0.171416971 | -           | 0.118135175 | -           |
| ZNF486    | 90649    | 1522  | 0.402863669 | -           | 0.138820474 | 0.133001881 |
| GHR       | 2690     | 4777  | 0.128356396 | 0.139940978 | 0.176918368 | 0.12712719  |
| TSPAN12   | 23554    | 2579  | 0.237750486 | -           | 0.573475506 | 0.156982445 |
| LOC100197 | 1E+08    | 626   | 0.979486428 | 0.355962755 | 0.337515593 | 0.646737581 |
| RTEL1-TNF | 1.01E+08 | 5772  | 0.106229817 | 0.115817404 | 0.109815365 | 0.070141671 |
| LZTS1     | 11178    | 5459  | 0.112320664 | 0.163277292 | 0.193519657 | 0.037081675 |
| PPT2-EGFL | 1.01E+08 | 2728  | 0.224764848 | 0.163367071 | 0.154900851 | -           |
| NPHS1     | 4868     | 5024  | 0.122045881 | 0.177414558 | 0.168220351 | 0.201461846 |
| C16orf89  | 146556   | 1898  | 0.32305506  | 0.35221183  | 0.222639369 | 0.106653774 |
| FAM90A25  | 389633   | 2042  | 0.300273508 | -           | -           | 0.099132646 |
| NRSN2     | 80023    | 2402  | 0.255269985 | 0.185539288 | 0.527772093 | 0.08427513  |
| TAS2R19   | 259294   | 900   | 0.681287227 | 0.495183744 | -           | 0.674762877 |
| LOC100507 | 1.01E+08 | 1256  | 0.488183522 | -           | -           | 0.322338954 |
| LINC00221 | 338005   | 1743  | 0.351783422 | 0.6392217   | 0.121219025 | 0.348414566 |
| MFAP5     | 8076     | 2900  | 0.211433967 | 0.461033141 | 0.291427257 | 0.209409169 |
| LINC00202 | 387644   | 3650  | 0.167988631 | 0.122100101 | 0.115772472 | 0.22183985  |

|           |          |       |             |             |             |             |
|-----------|----------|-------|-------------|-------------|-------------|-------------|
| CLDN16    | 10686    | 3290  | 0.186370366 | 0.270921197 | 0.256881169 | 0.246114119 |
| KIAA1671  | 85379    | 10517 | 0.058301655 | 0.084751425 | -           | 0.057743329 |
| LOC44090  | 440905   | 4525  | 0.135504642 | -           | -           | -           |
| LRRC4     | 64101    | 3723  | 0.164694737 | -           | -           | 0.108745024 |
| FLJ42709  | 441094   | 3380  | 0.181407841 | 0.13185366  | -           | -           |
| PRINS     | 1E+08    | 2199  | 0.278835154 | 1.013336447 | 0.288246605 | 0.460274813 |
| CCR2      | 729230   | 2689  | 0.228024732 | 0.082868235 | 0.235721192 | 0.376401753 |
| ANKS4B    | 257629   | 2906  | 0.210997421 | 0.306720832 | 0.508944711 | 0.48761254  |
| TLR7      | 51284    | 4992  | 0.122828226 | 0.089275915 | 0.380922046 | 0.243303922 |
| WDR17     | 116966   | 7529  | 0.081439568 | 0.177579507 | 0.028062792 | 0.080659661 |
| GSTA4     | 2941     | 1352  | 0.453519604 | 0.164817075 | 0.156275711 | -           |
| HYDIN     | 54768    | 15729 | 0.038982676 | -           | -           | -           |
| ZMAT1     | 84460    | 3489  | 0.175740471 | -           | 0.181672194 | 0.058019164 |
| CCDC140   | 151278   | 1699  | 0.360893763 | 1.0492416   | 0.248716611 | 3.455230739 |
| SELL      | 6402     | 2442  | 0.251088659 | 52.01254312 | 0.259563589 | 146.1433601 |
| NOS1AP    | 9722     | 5559  | 0.110300145 | 0.200425153 | 0.076015385 | -           |
| HLA-DMA   | 3108     | 1122  | 0.54648708  | 4.170665222 | 1.318175873 | 5.953790087 |
| STEAP4    | 79689    | 4587  | 0.133673099 | 0.097158354 | 0.046061644 | 0.044130993 |
| TRPM1     | 4308     | 5428  | 0.112962142 | 0.082104895 | 0.116774923 | 0.223760718 |
| FLJ42969  | 441374   | 1948  | 0.314763092 | 0.22878099  | -           | 0.207832508 |
| RPL18AP3  | 390354   | 616   | 0.995387182 | -           | 0.342994742 | -           |
| SIAE      | 54414    | 3038  | 0.201829659 | 0.146696962 | 0.139094642 | 0.333161394 |
| TRIM61    | 391712   | 1607  | 0.381554763 | 0.554655096 | 0.525911043 | -           |
| AMN       | 81693    | 1574  | 0.389554323 | 0.141570956 | 0.536937132 | 0.128607918 |
| GRHL1     | 29841    | 3610  | 0.169850001 | 0.061726505 | 0.292638174 | 0.728968205 |
| SLFN14    | 342618   | 2882  | 0.212754512 | 0.154637533 | 0.146623707 | 0.28095609  |
| LOC14457  | 144571   | 2187  | 0.280365114 | 0.101889659 | 0.096609402 | 0.185120131 |
| KCP       | 375616   | 2774  | 0.221037673 | 0.321316056 | -           | -           |
| PLCL1     | 5334     | 6608  | 0.092790331 | 0.20232992  | 0.159870431 | -           |
| LCN10     | 414332   | 2047  | 0.299540061 | -           | 0.516083931 | -           |
| CDK15     | 65061    | 1534  | 0.399712193 | 0.145262506 | 0.413203575 | 0.395884347 |
| GPR56     | 9289     | 4058  | 0.151098695 | 0.384383636 | 0.10413246  | 0.997677984 |
| NPM2      | 10361    | 1118  | 0.548442311 | 1.395195701 | 0.566953742 | 2.534887372 |
| OSCP1     | 127700   | 1505  | 0.407414288 | 0.444184754 | 0.421165637 | 0.403512684 |
| HTR3B     | 9177     | 1847  | 0.331975368 | 0.482582966 | 0.114393482 | 0.109598735 |
| SLC23A3   | 151295   | 2418  | 0.253580854 | 0.276467351 | 0.262139902 | -           |
| NRXN2     | 9379     | 6639  | 0.092357057 | 0.234949359 | 0.095474361 | 0.213436066 |
| MYO5B     | 4645     | 9520  | 0.064407406 | 0.046813589 | 0.08877511  | -           |
| MAGI2-AS3 | 1.01E+08 | 8509  | 0.072059996 | 0.130939408 | 0.148984436 | 0.166529797 |
| STK33     | 65975    | 2707  | 0.226508498 | 0.082317209 | -           | 0.373898897 |
| TERC      | 7012     | 451   | 1.359553224 | -           | 1.873922495 | 0.448844485 |
| MUC1      | 4582     | 1853  | 0.330900434 | 0.601275458 | 0.684138461 | 3.168071789 |
| PNMAL1    | 55228    | 3708  | 0.165360977 | 0.120190229 | -           | 0.054592466 |
| LDHAL6A   | 160287   | 2583  | 0.237382309 | 0.431344725 | 0.572587429 | 0.548587704 |
| CD300LG   | 146894   | 2799  | 0.219063417 | 0.955338413 | 0.377429013 | 0.144643703 |
| LRRC48    | 83450    | 2157  | 0.28426449  | 0.206613523 | -           | -           |
| LOC10050  | 1.01E+08 | 4827  | 0.127026829 | 0.046163805 | 0.131314333 | 0.167747141 |
| CCDC141   | 285025   | 9127  | 0.067180728 | 0.170902684 | -           | 0.088716495 |
| WBP1      | 23559    | 1237  | 0.495681895 | 0.540418799 | 0.341608345 | 0.654579993 |
| LEKR1     | 389170   | 2572  | 0.238397552 | -           | 0.164296082 | 0.157409691 |
| FBN3      | 84467    | 8967  | 0.068379447 | 0.024850305 | 0.094249921 | 0.02257487  |
| LOC44097  | 440970   | 7319  | 0.083776268 | 0.060891566 | 0.057735964 | 0.027657995 |
| COL8A2    | 1296     | 4447  | 0.137881382 | 0.200434167 | 0.142535256 | 0.31864224  |
| FKBP9L    | 360132   | 2561  | 0.239421517 | 0.087010029 | 0.082500883 | 0.079042898 |
| VTN       | 7448     | 1678  | 0.365410312 | -           | -           | 0.361910959 |
| LOC10028  | 1E+08    | 3510  | 0.174689033 | 0.190455286 | 0.060195089 | 0.115344081 |
| MDH1B     | 130752   | 2332  | 0.262932463 | -           | 0.090602385 | -           |
| AEBP1     | 165      | 4125  | 0.148644486 | -           | -           | -           |
| LOC10050  | 1.01E+08 | 2129  | 0.288003055 | 0.104665423 | 0.198482632 | 0.380326657 |
| SOCS3     | 9021     | 2746  | 0.223291516 | 0.811481008 | 0.692484651 | 6.266006319 |
| FAM66C    | 440078   | 3266  | 0.187739897 | 0.068228011 | 0.064692211 | 0.247922674 |
| HEATR4    | 399671   | 3551  | 0.172672065 | -           | 0.178500221 | 0.057006157 |

|           |        |      |             |             |             |             |
|-----------|--------|------|-------------|-------------|-------------|-------------|
| C17orf66  | 256957 | 1969 | 0.311406046 | 0.22634097  | 0.214611236 | 0.102807955 |
| LINC00256 | 286333 | 5802 | 0.105680542 | -           | -           | 0.244226481 |
| DCDC2B    | 149069 | 1367 | 0.448543163 | 0.652034191 | 0.154560908 | 0.444247688 |
| PHLDB3    | 653583 | 2505 | 0.244773854 | 0.088955164 | -           | -           |
| FLJ33065  | 440952 | 2125 | 0.288545178 | 0.20972488  | 0.298284369 | 1.238388338 |
| SRCRB4D   | 136853 | 2806 | 0.218516929 | 0.238238793 | 0.150594983 | -           |
| MFSD4     | 148808 | 4114 | 0.149041931 | 0.379151384 | 0.359502511 | 0.590458521 |
| RASGRP1   | 10125  | 5048 | 0.121465631 | 0.132428299 | 0.292986    | 0.040100805 |
| NID2      | 22795  | 5063 | 0.121105768 | 0.132035958 | 0.250386839 | 0.399819994 |
| RFPL3-AS1 | 10737  | 1357 | 0.451848566 | 0.492629369 | 0.155699898 | 0.298347624 |
| RNASE4    | 6038   | 1805 | 0.339700002 | 0.864171077 | -           | 2.579425955 |
| CYP2D7P1  | 1564   | 1680 | 0.3649753   | 0.265277006 | 0.125764739 | 0.240986742 |
| CASC2     | 255082 | 3284 | 0.186710872 | 0.135708091 | 0.193012876 | -           |
| LRRC46    | 90506  | 1938 | 0.316387257 | 0.114980745 | 0.436088259 | 0.417809831 |
| GPX8      | 493869 | 3750 | 0.163508934 | 0.297110246 | 0.281713015 | 0.323886181 |
| ASPHD2    | 57168  | 3313 | 0.185076518 | 0.739861012 | 0.25509781  | 2.016345451 |
| RPS2P32   | 256355 | 1041 | 0.58900913  | 2.140563734 | 0.81185307  | 3.111298566 |
| MPPED2    | 744    | 5693 | 0.107703935 | 0.078283044 | 0.148452318 | 0.035557503 |
| MTMR8     | 55613  | 2675 | 0.229218132 | 0.999623259 | 0.789849575 | 0.60539473  |
| C14orf55  | 317760 | 3059 | 0.200444101 | 0.364224722 | 0.207209638 | 0.198524547 |
| HTR2B     | 3357   | 2240 | 0.273731475 | 0.994788771 | 0.943235542 | 1.084440337 |
| UCN       | 7349   | 615  | 0.997005698 | 2.536306981 | 1.030657372 | 1.974915736 |
| CAMSAP3   | 57662  | 4201 | 0.145955369 | 0.212171088 | 0.100587842 | 1.060089261 |
| TNFSF9    | 8744   | 1680 | 0.3649753   | 3.979155085 | 0.503058956 | 11.5673636  |
| C14orf128 | 84837  | 1281 | 0.478656131 | -           | 0.164937362 | 0.158024093 |
| AKR1CL1   | 340811 | 2182 | 0.281007564 | 0.102123137 | -           | 0.092772165 |
| NDRG4     | 65009  | 3581 | 0.171225497 | -           | 0.118003218 | -           |
| DLX6-AS1  | 285987 | 1990 | 0.308119851 | 2.127548246 | 0.318519741 | 1.932737888 |
| CYP3A7    | 1551   | 2095 | 0.29267709  | 0.10636405  | -           | 0.096624756 |
| IL17B     | 27190  | 711  | 0.862388895 | 0.313407433 | -           | -           |
| PCDHB4    | 56131  | 3621 | 0.169334025 | 0.061538991 | 0.175049512 | 0.167712397 |
| RGPD4     | 285190 | 7172 | 0.085493378 | 0.062139622 | -           | -           |
| SHE       | 126669 | 6186 | 0.099120353 | 0.108066287 | 0.034155312 | 0.229065962 |
| CEACAM6   | 4680   | 2631 | 0.233051503 | 3.049021912 | -           | 0.076939895 |
| PLCE1     | 51196  | 7992 | 0.076721535 | 0.167291805 | 0.052874064 | 0.101315747 |
| TMEM215   | 401498 | 5399 | 0.113568902 | 0.041272955 | 0.039134055 | 0.03749377  |
| CCRL2     | 9034   | 1745 | 0.351380232 | 6.129495053 | 1.695121295 | 47.44607733 |
| GPX3      | 2878   | 1779 | 0.344664702 | 0.125257271 | 0.35629808  | 0.341364018 |
| S100A16   | 140576 | 1085 | 0.565123045 | -           | 0.389464998 | 0.186570381 |
| LOC28373  | 283731 | 2566 | 0.23895499  | 0.086840485 | 0.16468025  | 0.236666636 |
| CXorf41   | 139212 | 1953 | 0.313957247 | 0.228195274 | 0.216369443 | 0.103650211 |
| FLJ30838  | 400955 | 4313 | 0.142165199 | 0.154996071 | 0.146963664 | 0.093869169 |
| BCL6      | 604    | 3662 | 0.16743815  | 5.050549654 | 1.500110266 | 13.10093952 |
| ATP13A4   | 84239  | 4281 | 0.143227868 | 0.156154649 | -           | 0.094570831 |
| EME2      | 197342 | 1335 | 0.45929476  | 1.836074556 | 1.740923127 | 1.213056857 |
| RARG      | 5916   | 2992 | 0.204932655 | 0.670285482 | 0.211849694 | 1.014850583 |
| C16orf86  | 388284 | 1287 | 0.476424634 | 1.038847015 | 1.31334739  | 0.629149535 |
| CEACAM1   | 634    | 3528 | 0.173797762 | 4.610767003 | 0.119775942 | 27.31183072 |
| ANKRD24   | 170961 | 4041 | 0.151734349 | 0.330857735 | 0.104570533 | 0.551031302 |
| SLC5A10   | 125206 | 2139 | 0.286656617 | 0.416704413 | 0.098777355 | 0.189274299 |
| GRAP      | 10750  | 2089 | 0.293517714 | 1.066695475 | 0.910274223 | 5.038918561 |
| LOC14869  | 148696 | 4241 | 0.144578756 | 0.052542486 | -           | 0.047731399 |
| CDH6      | 1004   | 8571 | 0.071538736 | 0.051996893 | 0.098604486 | -           |
| SLC22A1   | 6580   | 1921 | 0.319187144 | 0.463993097 | 0.439947447 | 0.632260894 |
| GPR137C   | 283554 | 3908 | 0.156898287 | 0.114039245 | 0.216258712 | 0.207194333 |
| LINC00485 | 283432 | 3719 | 0.164871875 | 0.179752098 | 0.170436753 | 0.217723972 |
| TNR       | 7143   | 5190 | 0.118142294 | 0.686960107 | 0.447809706 | 0.078007269 |
| RARB      | 5915   | 3142 | 0.19514911  | 2.836826031 | 0.067245309 | 1.352961847 |
| LOC28400  | 284009 | 576  | 1.064511292 | 1.1605869   | 0.733627644 | -           |
| STEAP2    | 261729 | 6932 | 0.088453333 | 0.128582045 | 0.274316626 | 0.116808346 |
| SULT2B1   | 6820   | 1281 | 0.478656131 | 1.739521348 | -           | 1.10616865  |
| TLE6      | 79816  | 2033 | 0.301602806 | 1.424901575 | 0.415710303 | 0.497857508 |

|           |        |      |             |             |             |             |
|-----------|--------|------|-------------|-------------|-------------|-------------|
| EREG      | 2069   | 4628 | 0.132488873 | 0.096297617 | 0.228267893 | 0.087480062 |
| KIAA1324L | 222223 | 6613 | 0.092720173 | 0.134784627 | 0.031949911 | 0.061221492 |
| LOH12CR2  | 503693 | 1538 | 0.398672629 | 0.434654131 | 0.824257847 | 0.394854739 |
| TAS2R45   | 259291 | 900  | 0.681287227 | 0.247591872 | 0.704282538 | 0.224920959 |
| LOC100129 | 1E+08  | 2017 | 0.303995292 | 0.552386427 | 0.419007955 | -           |
| CD28      | 940    | 3807 | 0.16106081  | -           | -           | 0.106345607 |
| HIST1H2AI | 8329   | 469  | 1.307374209 | -           | 0.450500557 | -           |
| FAS-AS1   | 1E+08  | 1554 | 0.394567892 | 0.286785952 | 0.13596188  | 0.130263104 |
| C6orf164  | 63914  | 1558 | 0.393554881 | 0.572099319 | 0.813676873 | 0.649643334 |
| RAB30     | 27314  | 1619 | 0.378726686 | 0.412908001 | 0.13050325  | 0.500133077 |
| C12orf60  | 144608 | 1139 | 0.538330557 | 0.391277761 | 0.927501147 | 0.355450154 |
| LPIN3     | 64900  | 4464 | 0.137356296 | 0.349424013 | 0.141992447 | 0.045346968 |
| ZNF843    | 283933 | 2013 | 0.304599356 | 0.110696813 | 0.20992028  | 0.201121573 |
| MGC23284  | 197187 | 2447 | 0.250575604 | 2.094463322 | 0.604410842 | 0.661802576 |
| TAS2R4    | 50832  | 900  | 0.681287227 | 0.495183744 | 0.469521692 | -           |
| DOK2      | 9046   | 1870 | 0.327892248 | 1.906589816 | 1.016878531 | 3.78877551  |
| KLK14     | 43847  | 1133 | 0.541181381 | -           | -           | -           |
| SAMD4A    | 23034  | 6532 | 0.093869949 | -           | 0.032346106 | 0.37188401  |
| ARSD      | 414    | 5159 | 0.118852201 | -           | 0.163818384 | 0.274666028 |
| FAM179A   | 165186 | 3564 | 0.172042229 | 6.252319998 | 0.414981293 | 18.28902746 |
| MRGPRF    | 116535 | 2319 | 0.264406427 | -           | 0.182220579 | -           |
| A1BG-AS1  | 503538 | 2175 | 0.281911956 | 0.819614473 | 0.679996933 | 0.744565933 |
| ZDHHC15   | 158866 | 6057 | 0.101231386 | 0.367892826 | 0.244179186 | 0.200523886 |
| P2RX5     | 5026   | 2341 | 0.261921616 | 1.522991438 | 0.902540629 | 2.075306583 |
| PIP5K1P1  | 206426 | 4243 | 0.144510607 | 0.105035439 | -           | 0.0477089   |
| STK32B    | 55351  | 3224 | 0.19018564  | -           | -           | -           |
| TMEM72    | 643236 | 1085 | 0.565123045 | 3.491387687 | 0.778929996 | 2.611985328 |
| GPR34     | 2857   | 1938 | 0.316387257 | 4.139306837 | 1.962397164 | 26.42647179 |
| C6orf27   | 80737  | 2914 | 0.210418155 | 0.152939386 | 0.072506782 | 1.319886203 |
| C14orf82  | 145438 | 2246 | 0.273000224 | 0.297639383 | -           | 0.090128612 |
| ITGB1BP2  | 26548  | 1235 | 0.496484619 | 0.721725295 | 0.855403892 | 0.16391001  |
| MGAT3     | 4248   | 5102 | 0.120180028 | -           | 0.207060723 | 0.079352749 |
| DLK2      | 65989  | 1574 | 0.389554323 | 0.283141912 | -           | 0.257215836 |
| KIAA1210  | 57481  | 7838 | 0.078228949 | 0.085289366 | 0.026956464 | 0.129132982 |
| CIITA     | 4261   | 4654 | 0.131748712 | 0.095759641 | -           | 0.13048702  |
| C2        | 717    | 2867 | 0.213867633 | 0.233169883 | 0.368477086 | 8.543387659 |
| FLJ43879  | 401039 | 3489 | 0.175740471 | 0.191601621 | 0.060557398 | 0.058019164 |
| PRDM12    | 59335  | 2492 | 0.246050764 | 0.178838431 | 0.254355652 | 0.081231486 |
| CLEC4A    | 50856  | 1284 | 0.477537776 | 1.041274228 | 0.822759974 | 2.995442676 |
| CCDC64    | 92558  | 3081 | 0.199012822 | 0.506273545 | 0.274306733 | 1.445451147 |
| LINC00470 | 56651  | 2231 | 0.274835726 | 0.399520726 | 0.568224369 | 0.181469173 |
| HIST1H3G  | 8355   | 467  | 1.312973242 | 0.477157783 | 0.452429896 | -           |
| FBXL8     | 55336  | 1618 | 0.378960757 | 0.550884264 | 0.914087348 | 0.250221091 |
| TTY15     | 64595  | 5262 | 0.116525751 | 0.254085159 | 0.120458815 | 0.076939895 |
| ANKRD30B  | 149992 | 3438 | 0.178347442 | 0.388887757 | 0.430190032 | 0.294399161 |
| RP1L1     | 94137  | 7978 | 0.076856167 | 0.055861791 | 0.026483425 | 0.202987077 |
| TTLL13    | 440307 | 1793 | 0.34197351  | 0.497116977 | 0.353516054 | 0.338698599 |
| ADAMTS10  | 81794  | 4237 | 0.144715248 | 0.420736719 | 1.146931676 | 1.481070274 |
| ID1       | 3397   | 1234 | 0.496886956 | 12.27927274 | 0.342438835 | 10.82682735 |
| LDLRAD2   | 401944 | 4012 | 0.152831133 | -           | 0.105326401 | 0.100911696 |
| GDPD3     | 79153  | 1115 | 0.549917941 | 1.199099649 | 0.378986119 | 0.363101099 |
| SBK1      | 388228 | 5010 | 0.122386927 | 0.133432745 | 0.126517821 | 0.080809925 |
| NAALADL2  | 254827 | 4912 | 0.124828686 | 0.181459841 | 0.043013999 | 0.082422175 |
| HPCA      | 3208   | 1440 | 0.425804517 | 0.15474492  | 0.146725529 | -           |
| RNY4      | 6086   | 96   | 6.387067751 | 9.284695198 | -           | 10.54316995 |
| BAI2      | 576    | 5434 | 0.112837413 | -           | 0.07776399  | -           |
| LOC100133 | 1E+08  | 1525 | 0.40207115  | 0.146119793 | 0.415642153 | 0.132740238 |
| PLAC8L1   | 153770 | 725  | 0.845735868 | 1.229421709 | 2.331418056 | 0.279212225 |
| DYNC111   | 1780   | 3061 | 0.13354209  | -           | -           | -           |
| RERP3     | 646396 | 804  | 0.508423304 | -           | -           | -           |
| ABCA12    | 26154  | 9112 | 0.04486088  | 0.04890972  | 0.069562586 | 0.044431269 |
| NRL       | 4901   | 1974 | 0.207078184 | 0.564419161 | 0.321101461 | 0.922927947 |

|           |          |      |             |             |             |             |
|-----------|----------|------|-------------|-------------|-------------|-------------|
| KCNH6     | 81033    | 3421 | 0.119489137 | 0.45595697  | -           | 0.118344848 |
| ASIP      | 434      | 584  | 0.69995263  | -           | -           | 0.693249531 |
| LOC10050  | 1.01E+08 | 1143 | 0.35763109  | -           | -           | -           |
| C19orf80  | 55908    | 888  | 0.460329207 | -           | -           | -           |
| GPD2      | 2820     | 6046 | 0.067610376 | 0.036856216 | -           | -           |
| GMPR      | 2766     | 1515 | 0.269816723 | -           | 0.278923777 | 11.62462777 |
| FAM111B   | 374393   | 3574 | 0.114373905 | 0.124696522 | 0.059117169 | 0.169917904 |
| LOC100129 | 1E+08    | 1698 | 0.240737536 | 0.131232441 | -           | -           |
| TTLL6     | 284076   | 3454 | 0.118347521 | 0.516115078 | -           | 0.70328499  |
| TMC1      | 117531   | 3201 | 0.127701448 | -           | 0.066005861 | -           |
| TXNDC2    | 84203    | 2175 | 0.187941304 | 0.102451809 | 0.097142419 | 0.279212225 |
| LRRIQ3    | 127255   | 2865 | 0.142677953 | 0.233332654 | 0.073746863 | 0.070655799 |
| HLA-A     | 3105     | 1574 | 0.259702882 | 3.5392739   | 0.402702849 | 10.54584928 |
| COL16A1   | 1307     | 5584 | 0.073204215 | 0.079811134 | 0.037837529 | 0.036251587 |
| TNFSF4    | 7292     | 3493 | 0.117026148 | 0.255176278 | 0.423416355 | 0.811338128 |
| PLAC9     | 219348   | 691  | 0.591566333 | 0.644957119 | 0.305766659 | 0.878851793 |
| CRYBB1    | 1414     | 921  | 0.443835327 | 0.241946455 | 0.229407993 | 0.439584936 |
| TRIM17    | 51127    | 2085 | 0.196053878 | 0.106874189 | -           | 0.679617286 |
| TINAGL1   | 64129    | 2252 | 0.181515247 | 0.098948794 | 0.093820942 | -           |
| C9orf169  | 375791   | 757  | 0.539989876 | 0.588725719 | -           | -           |
| LOC284100 | 284100   | 2455 | 0.166506043 | -           | -           | -           |
| AKNAD1    | 254268   | 3066 | 0.133324311 | -           | -           | -           |
| RAET1K    | 646024   | 1891 | 0.216167285 | 0.353515629 | 0.446927047 | 0.107048579 |
| NINL      | 22981    | 4979 | 0.082099284 | 0.044754506 | -           | -           |
| CUEDC1    | 404093   | 2193 | 0.186398694 | 0.101610891 | -           | 3.046125161 |
| PCDH9     | 5101     | 6234 | 0.065571437 | 0.142978944 | -           | 0.032471746 |
| ALG1L     | 200810   | 944  | 0.433021542 | 0.236051573 | -           | 0.42887471  |
| NOX5      | 79400    | 3015 | 0.135579548 | -           | -           | 0.134281169 |
| MYO1H     | 283446   | 4276 | 0.095596898 | 0.052112415 | 0.049411778 | 0.094681414 |
| SLC16A11  | 162515   | 1803 | 0.226717879 | 0.123589953 | -           | 0.112273357 |
| LOC401021 | 401022   | 3819 | 0.107036485 | -           | 0.05532463  | -           |
| CLEC10A   | 10462    | 1788 | 0.228619875 | -           | 0.118168211 | -           |
| ZNF596    | 169270   | 2890 | 0.141443715 | 0.539733146 | 0.219326742 | 0.280178357 |
| POU2F3    | 25833    | 2965 | 0.137865881 | 0.075154362 | 0.142519232 | 0.136545607 |
| LIPN      | 643418   | 1197 | 0.341497357 | 1.116955813 | -           | 0.507340509 |
| NPC1L1    | 29881    | 5066 | 0.080689368 | -           | -           | -           |
| SYT3      | 84258    | 2928 | 0.139608038 | -           | -           | -           |
| CRYGS     | 1427     | 843  | 0.484901941 | 1.321664797 | 1.754440486 | 0.240129138 |
| TOP1P1    | 7151     | 2431 | 0.168149871 | 0.274988916 | 0.086912695 | 0.666158331 |
| KCNAB3    | 9196     | 1608 | 0.254211652 | 0.970042782 | 0.262791992 | 0.881220175 |
| FLJ43390  | 646113   | 6636 | 0.061599207 | 0.167896839 | 0.159195872 | 0.122018603 |
| LOC151534 | 151534   | 2449 | 0.16691398  | 0.090989255 | 0.086273892 | 0.165315527 |
| DGCR9     | 25787    | 2434 | 0.16794262  | 0.549299962 | 0.086805572 | 0.748504423 |
| CCDC36    | 339834   | 2994 | 0.136530506 | 0.074426414 | 0.211708178 | 0.270446043 |
| ACVRL1    | 94       | 4263 | 0.09588842  | 0.209085325 | -           | 0.284910433 |
| IL2RB     | 3560     | 4045 | 0.101056202 | 0.055088426 | 0.57456919  | 0.150132655 |
| CEP70     | 80321    | 2678 | 0.152640902 | 0.08320862  | -           | -           |
| VNN2      | 8875     | 2034 | 0.200969683 | -           | 0.311629442 | 0.398090193 |
| DIRC3     | 729582   | 3906 | 0.104652416 | 0.057048818 | 0.054092361 | -           |
| TBX4      | 9496     | 2470 | 0.165494873 | -           | -           | -           |
| CD274     | 29126    | 3691 | 0.110748398 | 0.664090905 | -           | 41.95558931 |
| C9orf84   | 158401   | 4637 | 0.088154483 | 0.240276779 | 0.318954783 | 0.261930813 |
| PMEL      | 6490     | 2195 | 0.186228855 | 0.101518307 | 0.096257294 | -           |
| LINC00482 | 284185   | 2970 | 0.137633783 | 0.07502784  | 0.213418951 | 0.408947198 |
| PP2D1     | 151649   | 1617 | 0.252796745 | 0.551224947 | 0.522658655 | 0.250375835 |
| SMTNL1    | 219537   | 1649 | 0.247891047 | -           | 0.128129024 | 3.314481079 |
| MYH15     | 22989    | 7074 | 0.057785176 | 0.157501191 | 0.029867792 | 0.14307949  |
| HOX A3    | 3200     | 3396 | 0.120368768 | 0.590545984 | 0.062215772 | 1.549808727 |
| CYTH4     | 27128    | 3138 | 0.130265244 | 7.314138473 | 3.905199541 | 28.38390685 |
| ZNF322P1  | 387328   | 2374 | 0.172187168 | 0.28159143  | 0.622996348 | 0.170538216 |
| ATO H8    | 84913    | 5873 | 0.069601964 | 0.227651304 | 0.071951221 | 0.792757338 |
| LOC100499 | 1E+08    | 1156 | 0.353609287 | -           | 0.36554457  | -           |



|           |          |       |             |             |             |             |
|-----------|----------|-------|-------------|-------------|-------------|-------------|
| TUBB1     | 81027    | 3496  | 0.116925725 | 0.446175284 | 0.181308434 | 0.289514964 |
| GNAZ      | 2781     | 3225  | 0.126751112 | -           | 0.131029309 | -           |
| HNRNPA1F  | 664709   | 1354  | 0.301899805 | 0.164573622 | 0.312089751 | -           |
| IL10      | 3586     | 1629  | 0.250934522 | 0.410373268 | 0.778212749 | 2.609580185 |
| C3orf20   | 84077    | 3349  | 0.122058028 | 0.066537081 | 0.126177821 | 0.181333708 |
| DZIP1     | 22873    | 7514  | 0.054401429 | 0.059311335 | 0.196831691 | 0.107760907 |
| ZCWPW2    | 152098   | 1752  | 0.233317543 | 1.017500844 | 0.602981625 | 0.577707942 |
| GALNT8    | 26290    | 2135  | 0.191462452 | 0.104371281 | -           | 0.284443367 |
| CASKIN2   | 57513    | 5005  | 0.081672794 | 0.044522015 | 0.126644213 | 0.040445327 |
| CDH15     | 1013     | 2875  | 0.142181682 | -           | -           | -           |
| CPA2      | 1358     | 1342  | 0.304599356 | 0.332090439 | 0.15744021  | 0.15084118  |
| MESP1     | 55897    | 1184  | 0.345246905 | 0.188203281 | 0.535349902 | -           |
| ABCB4     | 5244     | 3988  | 0.102500586 | -           | -           | -           |
| PLA2G2C   | 391013   | 453   | 0.902367188 | -           | -           | 0.446862832 |
| STX19     | 415117   | 1198  | 0.341212301 | 0.18600391  | 0.176364575 | -           |
| MYO15A    | 51168    | 11876 | 0.034420035 | 0.018763278 | 0.035581806 | 0.068180823 |
| FAM160A1  | 729830   | 4576  | 0.089329619 | -           | 0.046172369 | -           |
| BCAS4     | 55653    | 1368  | 0.298810187 | -           | 0.30889585  | 0.443922945 |
| CAPS2     | 84698    | 2155  | 0.189685539 | 0.51701319  | 0.196087946 | 0.469672536 |
| CCDC144C  | 348254   | 4204  | 0.097234143 | 0.159014761 | 0.150774092 | 0.288908939 |
| TNFRSF11E | 4982     | 2354  | 0.1736501   | -           | 0.179511267 | -           |
| SNTA1     | 6640     | 2345  | 0.174316561 | 0.380098396 | 0.090100111 | -           |
| CD3G      | 917      | 1311  | 0.311801934 | 0.679886147 | 0.483489156 | 0.463223943 |
| C1orf220  | 400798   | 2577  | 0.158623336 | 0.086469804 | 0.081988654 | 0.157104279 |
| SLC9B1    | 150159   | 1879  | 0.217547811 | 0.474364417 | -           | 0.323196694 |
| AKR1C3    | 8644     | 1224  | 0.333964327 | 0.910264235 | 0.345236538 | 3.473044217 |
| GRIP1     | 23426    | 5060  | 0.080785047 | 0.04403808  | 0.125267645 | 0.120017112 |
| GPM6A     | 2823     | 3614  | 0.113108007 | -           | 0.116925712 | -           |
| SLC10A5   | 347051   | 1317  | 0.310381425 | -           | 0.481286472 | -           |
| KIAA1211  | 57482    | 7013  | 0.058287799 | 0.095322694 | -           | 0.115459212 |
| GUCY1B2   | 2974     | 3025  | 0.135131351 | 0.073663697 | 0.209538606 | 0.200755897 |
| KCNH7     | 90134    | 4242  | 0.096363116 | -           | -           | 0.143160441 |
| LOC100129 | 1E+08    | 4300  | 0.095063334 | 0.155464664 | 0.196543964 | 0.09415296  |
| BEX4      | 56271    | 1290  | 0.31687778  | -           | -           | -           |
| TSPAN18   | 90139    | 4242  | 0.096363116 | -           | 0.099615635 | 0.095440294 |
| LUZP2     | 338645   | 5271  | 0.077551193 | 0.04227522  | -           | 0.23042557  |
| CYP4F35P  | 284233   | 2876  | 0.142132245 | 0.387400356 | 0.220394396 | -           |
| TEX14     | 56155    | 4954  | 0.082513592 | -           | 0.042649326 | 0.367755302 |
| LOC100289 | 1E+08    | 1431  | 0.285655022 | 1.401463426 | 1.181186646 | 0.707298613 |
| CCDC38    | 120935   | 1972  | 0.207288203 | 0.112998319 | 0.107142374 | -           |
| ERVFRD-1  | 405754   | 3318  | 0.123198414 | 0.067158736 | 0.063678349 | 0.244037207 |
| TRPC6     | 7225     | 4612  | 0.088632337 | 0.048315847 | -           | 0.087783549 |
| FBXW12    | 285231   | 1647  | 0.248192068 | -           | -           | -           |
| DSPP      | 1834     | 4331  | 0.094382899 | -           | 0.04878429  | -           |
| LOC650293 | 650293   | 651   | 0.627914495 | 2.396050374 | 0.64910833  | 1.243802537 |
| SPATA17   | 128153   | 1251  | 0.326756464 | -           | 0.168892695 | -           |
| PNPLA1    | 285848   | 2478  | 0.164960588 | 0.899244087 | 0.767378068 | 3.512688098 |
| BCRP2     | 400892   | 2334  | 0.175138105 | -           | 0.181049496 | -           |
| CAHM      | 1.01E+08 | 903   | 0.452682543 | 0.740307923 | 0.23398091  | 1.120868566 |
| TMEM14E   | 645843   | 1293  | 0.316142565 | 1.034026379 | 0.490219864 | 0.78278756  |
| HHIPL1    | 84439    | 3462  | 0.118074043 | 0.064365305 | 0.061029683 | 0.058471653 |
| SLC25A41  | 284427   | 1571  | 0.260198814 | 0.283682603 | 0.537962473 | 1.417388601 |
| ZCCHC16   | 340595   | 2958  | 0.138192135 | 0.225996638 | 0.214284748 | 0.136868738 |
| C8orf31   | 286122   | 1875  | 0.218011913 | 0.237688197 | 0.450740824 | 0.431848241 |
| GALR2     | 8811     | 1309  | 0.312278332 | -           | 0.161409291 | -           |
| BST1      | 683      | 1497  | 0.273061013 | 0.595411315 | 0.141138785 | -           |
| CHRNA10   | 57053    | 1962  | 0.208344718 | 0.34072276  | 0.323065384 | 0.619048511 |
| KIAA0087  | 9808     | 4320  | 0.094623226 | 0.20632656  | 0.146725529 | 0.093717066 |
| GPR64     | 10149    | 4895  | 0.083508138 | 0.136567529 | 0.043163383 | 0.330833688 |
| C17orf100 | 388327   | 1560  | 0.262033549 | 0.285682929 | 0.541755798 | 0.908334641 |
| TNS4      | 84951    | 4090  | 0.099944336 | 0.054482319 | 0.154976598 | -           |
| BAAT      | 570      | 3478  | 0.117530861 | 0.128138404 | 0.060748925 | 0.058202663 |

|           |          |       |             |   |             |             |             |
|-----------|----------|-------|-------------|---|-------------|-------------|-------------|
| GEM       | 2669     | 2195  | 0.186228855 | - |             | 0.192514589 | 0.5533363   |
| NR4A3     | 8013     | 5707  | 0.071626483 |   | 1.288501594 | 0.370220363 | 9.825266346 |
| LRRD1     | 401387   | 2661  | 0.15361606  |   | 0.334960819 | 0.397002558 | 0.152144955 |
| BLOC1S1-F | 1.01E+08 | 1213  | 0.336992857 | - |             | 0.174183645 | -           |
| TSNAXIP1  | 55815    | 2455  | 0.166506043 | - |             | 0.430315196 | 0.164911497 |
| LOC72960  | 729609   | 628   | 0.650911363 |   | 0.354829116 | 0.672881406 | -           |
| COL10A1   | 1300     | 3307  | 0.123608206 | - |             | -           | -           |
| PTGES     | 9536     | 1787  | 0.22874781  |   | 54.74177314 | -           | 138.7662883 |
| MYLK      | 4638     | 7852  | 0.052059645 |   | 0.085137297 | 0.080725202 | 0.025780548 |
| DKFZp686  | 440034   | 1656  | 0.246843198 |   | 0.2691216   | 0.510349665 | 0.122239652 |
| LOC20026  | 200261   | 1926  | 0.212239011 |   | 0.694182819 | -           | 2.627581295 |
| NEUROD1   | 4760     | 2945  | 0.138802151 | - |             | -           | -           |
| C14orf178 | 283579   | 646   | 0.632774514 |   | 2.069653419 | -           | 1.253429492 |
| C9orf96   | 169436   | 2779  | 0.14709332  |   | 0.080184485 | 0.076029061 | -           |
| LOC10012  | 1E+08    | 1224  | 0.333964327 | - |             | 0.172618269 | -           |
| GNAT2     | 2780     | 1384  | 0.295355734 |   | 0.32201255  | 0.3053248   | 0.292527259 |
| XIST      | 7503     | 19271 | 0.021211786 | - |             | -           | 0.031512977 |
| ANGPTL4   | 51129    | 1967  | 0.207815117 |   | 20.95782749 | 0.644488342 | 139.960983  |
| BREA2     | 286076   | 1002  | 0.407956423 |   | 0.667163727 | 0.421726071 | 0.404049627 |
| TAS2R43   | 259289   | 1027  | 0.398025644 |   | 0.216974377 | 0.20573005  | 0.197106975 |
| COL6A3    | 1293     | 10599 | 0.038567066 |   | 0.021023935 | -           | -           |
| SRPK3     | 26576    | 2014  | 0.20296541  |   | 1.217060344 | 0.419632098 | 0.804086844 |
| MAGI2     | 9863     | 6880  | 0.059414584 |   | 0.032388472 | 0.030709994 | -           |
| C19orf26  | 255057   | 2564  | 0.159427588 |   | 0.086908223 | 0.082404353 | -           |
| KLK10     | 5655     | 3123  | 0.130890918 |   | 0.071352124 | -           | 0.12963744  |
| GPR162    | 27239    | 2516  | 0.162469132 |   | 0.08856625  | 0.335905821 | 0.241369868 |
| LOC10019  | 1E+08    | 3528  | 0.115865175 |   | 0.126322384 | -           | -           |
| C15orf5   | 81698    | 1512  | 0.270352074 |   | 0.294752228 | 0.558954395 | -           |
| FGF8      | 2253     | 1036  | 0.394567892 | - |             | 0.20394282  | -           |
| SLC30A4   | 7782     | 4290  | 0.095284927 | - |             | 0.098501054 | 0.707793227 |
| TNFRSF130 | 115650   | 934   | 0.437657747 |   | 0.954315566 | 0.904859792 | -           |
| SIM2      | 6493     | 4177  | 0.097862661 |   | 0.21339017  | 0.202331589 | 0.04846274  |
| C12orf53  | 196500   | 2240  | 0.18248765  | - |             | 0.094323554 | 0.180740056 |
| SFRP4     | 6424     | 2974  | 0.137448667 |   | 0.074926928 | 0.142087936 | 0.204198584 |
| MYOT      | 9499     | 2290  | 0.178503204 |   | 0.583841095 | 0.184528176 | 0.618778184 |
| HTR7      | 3363     | 3378  | 0.121010165 | - |             | -           | -           |
| ESPN      | 83715    | 3531  | 0.115766734 | - |             | -           | -           |
| DNAJB13   | 374407   | 1875  | 0.218011913 |   | 0.356532296 | 0.225370412 | 0.21592412  |
| DAPK2     | 23604    | 2628  | 0.155545029 |   | 8.309590222 | 0.8039755   | 29.65567437 |
| LOC10050  | 1.01E+08 | 4374  | 0.093455038 |   | 0.203779318 | 0.096609402 | 0.185120131 |
| CYP4F11   | 57834    | 3395  | 0.120404223 |   | 0.065635548 | 0.186702293 | 0.178876757 |
| CTF1      | 1489     | 1681  | 0.243172121 |   | 0.265119197 | -           | 0.240843382 |
| BEST4     | 266675   | 2096  | 0.19502497  |   | 0.318939911 | -           | -           |
| ADHFE1    | 137872   | 1907  | 0.214353611 |   | 0.467399444 | 0.221588633 | 0.212300853 |
| ACTL8     | 81569    | 1888  | 0.216510771 |   | 0.118025786 | 0.447637206 | 0.107218677 |
| CABYR     | 26256    | 2333  | 0.175213174 |   | 0.191026734 | 0.09056355  | 0.086767622 |
| LOC65356  | 653566   | 1624  | 0.251707104 | - |             | 0.130101454 | 0.124648315 |
| LOC10033  | 1E+08    | 3162  | 0.129276514 |   | 0.704720698 | 0.334099876 | 0.640192482 |
| FITM1     | 161247   | 1064  | 0.384184526 |   | 0.41885843  | 0.397151807 | 0.951263454 |
| LRRC17    | 10234    | 2303  | 0.177495587 |   | 0.677302993 | 0.550459647 | 0.966876896 |
| ITK       | 3702     | 4366  | 0.093626279 | - |             | -           | -           |
| KIAA0319  | 9856     | 6896  | 0.059276731 | - |             | 0.061277483 | 0.029354533 |
| C2orf62   | 375307   | 1414  | 0.289089347 |   | 0.1575903   | 0.149423452 | -           |
| PLSCR3    | 57048    | 2089  | 0.195678476 |   | 0.106669548 | 0.10114158  | 0.19380456  |
| SEMA3B    | 7869     | 2989  | 0.136758895 |   | 0.14910183  | 0.070687441 | 0.135449222 |
| A1BG      | 1        | 1766  | 0.231467914 |   | 0.630896616 | 1.196402952 | 0.458502521 |
| TMEM163   | 81615    | 1901  | 0.215030161 | - |             | 0.111144009 | -           |
| SPOCK2    | 9806     | 5345  | 0.076477518 |   | 0.166759727 | 0.158117689 | 0.075745131 |
| TIGD4     | 201798   | 2472  | 0.165360977 |   | 0.270428015 | 0.085471182 | 0.163777397 |
| VEPH1     | 79674    | 4313  | 0.094776799 | - |             | -           | 0.140803754 |
| GALNT4    | 8693     | 5408  | 0.075586601 | - |             | -           | 0.187156863 |
| KEL       | 3792     | 2562  | 0.159552044 |   | 0.086976067 | -           | -           |

|           |        |       |             |             |             |             |
|-----------|--------|-------|-------------|-------------|-------------|-------------|
| ETV2      | 2116   | 1490  | 0.27434385  | 0.149552137 | 0.709009266 | 0.135858297 |
| CRYBB2    | 1415   | 781   | 0.523396077 | -           | -           | -           |
| CLEC12B   | 387837 | 3044  | 0.13428789  | 0.219611713 | -           | 0.332504703 |
| C20orf107 | 388799 | 694   | 0.58900913  | -           | -           | 0.291684241 |
| G6PC      | 2538   | 3096  | 0.132032408 | 0.215923144 | -           | 0.196151999 |
| SEMA3E    | 9723   | 6629  | 0.061664253 | 0.100844479 | -           | 0.091610588 |
| C14orf176 | 643382 | 1526  | 0.26787178  | 0.29204808  | -           | 0.795919514 |
| LOC100133 | 1E+08  | 963   | 0.424478023 | 1.156971364 | 0.21940266  | 2.102065036 |
| ZNF833P   | 401898 | 2015  | 0.202864683 | -           | 0.104855961 | -           |
| NPFPR2    | 10886  | 2052  | 0.199206791 | -           | 0.205930567 | 0.098649543 |
| WNK3      | 65267  | 11356 | 0.035996155 | 0.117734775 | 0.09302781  | 0.089128594 |
| ZNF32     | 7580   | 1219  | 0.335334156 | 0.913997887 | 0.173326301 | -           |
| ATPAF1-AS | 374973 | 865   | 0.472569175 | -           | 0.24425984  | 0.234021807 |
| TPSAB1    | 7177   | 1194  | 0.34235539  | -           | 0.530866235 | -           |
| GIPR      | 2696   | 2024  | 0.201962617 | 0.2201904   | 0.208779408 | 2.200313728 |
| ZNF626    | 199777 | 6088  | 0.067143945 | 0.073203904 | 0.034705118 | 0.166252351 |
| TSPAN2    | 10100  | 3213  | 0.127224505 | -           | 0.723352747 | -           |
| SSC5D     | 284297 | 4910  | 0.083253022 | 0.090766878 | 0.129094559 | 0.082455749 |
| LOC339524 | 339524 | 1419  | 0.288070709 | -           | 0.148896942 | -           |
| PRRG1     | 5638   | 1783  | 0.229260985 | -           | 0.118499586 | 0.227065466 |
| ZNF705D   | 728957 | 3683  | 0.110988959 | 0.060503037 | 0.05736757  | -           |
| B3GNT8    | 374907 | 1894  | 0.215824887 | 6.470854098 | 0.669328705 | 24.04777939 |
| C10orf10  | 11067  | 2060  | 0.198433173 | 0.973540856 | 0.307696254 | 2.063595205 |
| PNMA3     | 29944  | 3771  | 0.108398922 | -           | 0.056028842 | -           |
| CHMP4C    | 92421  | 1847  | 0.221316912 | 0.361937225 | 0.114393482 | 0.657592408 |
| ZFPM2     | 23414  | 4507  | 0.090697212 | 0.346090258 | 0.23439623  | 0.44914325  |
| RMRP      | 6023   | 277   | 1.475712405 | 4.022250627 | 6.102086971 | 5.846320952 |
| ASTL      | 431705 | 1296  | 0.315410753 | 0.6877552   | 0.489085096 | 0.468585331 |
| CCDC154   | 645811 | 2191  | 0.186568843 | 0.203407289 | 0.86789724  | 0.369564332 |
| ELANE     | 1991   | 938   | 0.435791403 | -           | 0.450500557 | -           |
| CALHM1    | 255022 | 3056  | 0.133760581 | 0.291665818 | 0.069137684 | -           |
| LIPE      | 3991   | 3806  | 0.107402085 | 0.175643209 | 0.1665408   | 0.106373549 |
| NPY6R     | 4888   | 2988  | 0.136804664 | -           | -           | 0.067747277 |
| LOC100129 | 1E+08  | 2248  | 0.181838228 | 0.297374579 | 0.093987883 | 0.090048427 |
| MET       | 4233   | 6695  | 0.061056361 | 0.033283448 | -           | 0.030235827 |
| C9orf152  | 401546 | 2698  | 0.151509391 | -           | 0.078311624 | -           |
| VWA5B2    | 90113  | 4040  | 0.101181271 | 0.165469815 | -           | -           |
| VWA3A     | 146177 | 4686  | 0.087232679 | 0.190211425 | 0.135265532 | 0.086397295 |
| FAM170A   | 340069 | 1471  | 0.27788738  | 0.30296762  | 0.14363342  | 0.137613095 |
| RDH16     | 8608   | 1738  | 0.235196971 | 0.128212132 | 0.243135514 | 0.232944606 |
| MTRNR2L5  | 1E+08  | 1739  | 0.235061723 | 0.384415212 | 0.36449355  | 0.465621306 |
| NOX4      | 50507  | 4615  | 0.088574721 | 0.144853316 | 0.183128721 | 0.219316211 |
| PDE6H     | 5149   | 763   | 0.53574356  | -           | -           | 0.265306505 |
| SLC39A5   | 283375 | 2015  | 0.202864683 | -           | 0.209711922 | -           |
| FBXL16    | 146330 | 3543  | 0.115374636 | 0.125787573 | -           | -           |
| CASKIN1   | 57524  | 5695  | 0.071777408 | 0.156511104 | -           | -           |
| SCML4     | 256380 | 4540  | 0.090037959 | 0.294492535 | 0.232692468 | 0.75799354  |
| LOC283335 | 283335 | 2863  | 0.142777624 | 0.233495653 | 0.442790279 | 0.282820626 |
| LOC93432  | 93432  | 1637  | 0.249708208 | 0.272245186 | 0.129068272 | 0.247316876 |
| LOC644669 | 644669 | 2097  | 0.194931968 | 0.106262606 | 0.201511456 | 0.386130401 |
| CPA6      | 57094  | 1907  | 0.214353611 | 0.116849861 | 0.332382949 | 0.106150426 |
| SUMO4     | 387082 | 702   | 0.582296775 | 1.587127384 | 1.203901774 | 1.441801018 |
| CAPN12    | 147968 | 3129  | 0.130639928 | 0.213645911 | 0.472672844 | 0.194083282 |
| DHH       | 50846  | 1971  | 0.207393372 | -           | -           | 0.205407268 |
| OLAH      | 55301  | 1834  | 0.222885679 | 0.486003674 | 0.230408682 | 0.883004855 |
| KLRC3     | 3823   | 1042  | 0.392295908 | -           | 0.202768485 | -           |
| VASN      | 114990 | 2864  | 0.142727771 | 0.389023542 | 0.147545224 | 0.282721876 |
| FAM57B    | 83723  | 1943  | 0.210382057 | 0.573424305 | 0.217483028 | 0.208367332 |
| LRFN3     | 79414  | 2549  | 0.160365765 | -           | 0.082889275 | 0.079415011 |
| ZNF667    | 63934  | 4479  | 0.091264196 | 0.199002174 | 0.14151692  | 0.045195102 |
| ADCY10    | 55811  | 5421  | 0.075405338 | -           | -           | -           |
| NKAPL     | 222698 | 1639  | 0.2494035   | -           | -           | -           |

|           |        |       |             |             |             |             |
|-----------|--------|-------|-------------|-------------|-------------|-------------|
| C21orf71  | 282566 | 459   | 0.890571538 | 0.485474259 | -           | -           |
| GPR157    | 80045  | 1153  | 0.354529346 | -           | 0.549743525 | 0.175567097 |
| TMPRSS9   | 360200 | 3180  | 0.12854476  | 0.140146343 | 0.132883498 | 0.12731375  |
| FER1L4    | 80307  | 6598  | 0.061953976 | 0.033772762 | 0.160112732 | 0.214762358 |
| MGC3771   | 81854  | 1233  | 0.331526631 | 0.903619971 | 0.514074845 | 0.656703529 |
| SEPT4     | 5414   | 2381  | 0.171680948 | -           | -           | 1.615350019 |
| HGF       | 3082   | 2820  | 0.144954729 | -           | 2.772175947 | 0.215349854 |
| BOLL      | 66037  | 2842  | 0.143832631 | -           | 0.074343688 | -           |
| GIMAP8    | 155038 | 3952  | 0.103434296 | 0.281923943 | 0.213850973 | 1.126881322 |
| SLC2A9    | 56606  | 1885  | 0.216855351 | -           | 0.112087407 | -           |
| CA14      | 23632  | 1757  | 0.232653578 | 0.76095396  | 0.120253137 | 0.460851139 |
| C20orf103 | 24141  | 2059  | 0.198529546 | 0.54111871  | -           | -           |
| DIO1      | 1733   | 1876  | 0.217895702 | 0.118780749 | 0.112625139 | 0.215809022 |
| WWTR1     | 25937  | 5135  | 0.079605129 | 0.086789751 | 0.08229202  | 0.15768558  |
| TRPM8     | 79054  | 5621  | 0.072722351 | 0.07928578  | 0.112765395 | -           |
| RP1-177G6 | 286411 | 1398  | 0.292397951 | 0.637575636 | 0.453400775 | 0.434396702 |
| PRG4      | 10216  | 5059  | 0.080801015 | 0.08809357  | 0.041764135 | 0.080027224 |
| LOC100289 | 1E+08  | 747   | 0.547218656 | 2.983034602 | 0.565688785 | 5.148793034 |
| RASL11B   | 65997  | 1979  | 0.206554995 | -           | 0.320290189 | -           |
| ZNF525    | 170958 | 6105  | 0.066956976 | 0.182500151 | 0.103825436 | 0.099473643 |
| CYP8B1    | 1582   | 3950  | 0.103486667 | 0.169240014 | 0.106979626 | 0.15374344  |
| C9orf64   | 84267  | 2485  | 0.16449591  | 0.179342201 | 0.425120244 | 0.162920614 |
| IFITM10   | 402778 | 3721  | 0.109855506 | 5.030353539 | 0.511035435 | 18.93180444 |
| GGTA1P    | 2681   | 1755  | 0.23291871  | -           | -           | -           |
| SLCO2A1   | 6578   | 4234  | 0.09654519  | 0.157888062 | 0.049901928 | 0.095620625 |
| PRRT1     | 80863  | 1931  | 0.211689454 | -           | 0.109417277 | 0.104831105 |
| FAM84B    | 157638 | 5503  | 0.074281726 | 0.080985893 | 0.230366812 | 0.147140733 |
| CYP26B1   | 56603  | 4534  | 0.09015711  | 5.553615654 | -           | 10.40271837 |
| RHBDF1    | 64285  | 3091  | 0.132245984 | 0.216272421 | 0.136709648 | 0.13097953  |
| TXNRD3NE  | 645840 | 1165  | 0.350877542 | -           | -           | -           |
| ACSBG1    | 23205  | 3010  | 0.135804763 | -           | -           | 0.201756342 |
| ANKRD45   | 339416 | 2671  | 0.153040935 | 0.50056013  | 0.237309728 | 2.728356071 |
| TECRL     | 253017 | 2843  | 0.143782039 | -           | -           | -           |
| LOC100130 | 1E+08  | 1260  | 0.324422489 | 0.884256685 | 1.17380423  | 1.124604794 |
| BCHE      | 590    | 2461  | 0.166100096 | -           | -           | -           |
| CAGE1     | 285782 | 3074  | 0.132977338 | -           | -           | -           |
| C2orf77   | 129881 | 2187  | 0.186910076 | 0.203779318 | -           | 0.092560065 |
| C6orf25   | 80739  | 2560  | 0.159676694 | -           | 0.33013244  | 0.079073775 |
| USP2      | 9099   | 3748  | 0.109064124 | 0.178361274 | 0.056372668 | 0.432078683 |
| LRRC43    | 254050 | 2045  | 0.199888673 | 0.762752466 | 0.413270927 | 0.494936095 |
| GTSE1L    | 149699 | 842   | 0.485477834 | 1.058587576 | 1.003728082 | -           |
| HFE       | 3077   | 2222  | 0.183965948 | 0.100284737 | -           | 2.004246168 |
| NEK10     | 152110 | 2656  | 0.153905247 | -           | 0.079549985 | -           |
| EXD1      | 161829 | 2949  | 0.138613881 | 0.151124235 | 0.21493872  | 0.480502557 |
| EPHX4     | 253152 | 1443  | 0.283279512 | 0.463269615 | 0.585681944 | 0.841700054 |
| FAM123C   | 205147 | 6252  | 0.065382651 | 0.178209121 | 0.067589495 | 0.129513028 |
| SKOR1     | 390598 | 2766  | 0.147784648 | 0.24168404  | 0.30554557  | 0.219554081 |
| IL1R1     | 3554   | 4909  | 0.083269981 | 0.045392684 | 0.129120856 | 0.164945091 |
| QRFPR     | 84109  | 2347  | 0.174168017 | 0.569661742 | 0.180046665 | 0.431250241 |
| IMPG2     | 50939  | 8365  | 0.048866986 | 0.106554781 | 0.02525819  | 0.048399011 |
| LY86      | 9450   | 895   | 0.456728867 | 0.995900267 | 0.944289436 | 14.24918253 |
| FPR3      | 2359   | 2517  | 0.162404583 | -           | -           | 0.241273973 |
| OR7E91P   | 79315  | 1257  | 0.325196767 | 0.53182025  | 0.504259574 | 0.322082519 |
| UBE2NL    | 389898 | 1190  | 0.343506165 | -           | 0.17755022  | -           |
| C6orf174  | 387104 | 11818 | 0.034588961 | -           | 0.035756433 | 0.051386579 |
| VIPR2     | 7434   | 3961  | 0.103199277 | 0.168770021 | 0.053341268 | 0.102210989 |
| LOC100130 | 1E+08  | 2400  | 0.170321807 | -           | -           | 0.168690719 |
| LOC100289 | 1E+08  | 583   | 0.701153235 | 1.146651894 | 2.536866774 | 1.041657957 |
| HCG26     | 352961 | 1180  | 0.346417234 | 0.755365033 | 0.358109765 | 0.857749419 |
| MARVELD2  | 153562 | 2297  | 0.177959223 | 0.776082489 | 0.275948752 | 0.528764988 |
| ANKRD57   | 65124  | 4681  | 0.087325857 | 0.238018249 | 0.135410016 | 0.216223951 |
| PPEF2     | 5470   | 3430  | 0.119175608 | 0.064965797 | 0.246396223 | 0.236068645 |

|           |        |       |             |             |             |             |
|-----------|--------|-------|-------------|-------------|-------------|-------------|
| TMEM169   | 92691  | 3477  | 0.117564664 | 0.192262886 | 0.121532793 | 0.349316416 |
| CACNA1D   | 776    | 7771  | 0.052602282 | 0.229399238 | 0.08156663  | 0.078147805 |
| GLT8D2    | 83468  | 1906  | 0.214466073 | 0.116911167 | 0.221704891 | -           |
| GRIP2     | 80852  | 7977  | 0.051243868 | 0.027934397 | -           | 0.126882827 |
| GFRAL     | 389400 | 1911  | 0.213904938 | 0.116605277 | 0.110562408 | -           |
| RPL13AP2  | 387841 | 660   | 0.619352024 | 0.33762528  | 0.640256853 | 0.920131195 |
| CTTNBP2   | 83992  | 5980  | 0.068356578 | -           | 0.0353319   | -           |
| PTCHD1    | 139411 | 5305  | 0.077054163 | -           | 0.039827476 | -           |
| C4orf44   | 345222 | 1670  | 0.244773854 | 0.266865491 | 0.126517821 | 0.363644664 |
| ZNF155    | 7711   | 2673  | 0.152926426 | 0.083364267 | -           | 0.075730963 |
| RIMKLA    | 284716 | 10583 | 0.038625374 | 0.04211144  | -           | 0.038255478 |
| NOXRED1   | 122945 | 1869  | 0.21871179  | 0.238451241 | 0.113046956 | 0.433234592 |
| TEX11     | 56159  | 3151  | 0.129727812 | 0.282872339 | 0.201159722 | 0.256970946 |
| FRMD5     | 84978  | 2261  | 0.180792718 | 0.098554925 | 0.186894968 | -           |
| ZNF135    | 7694   | 3408  | 0.119944934 | 0.130770355 | 0.061996702 | 0.118796281 |
| CORT      | 1325   | 1238  | 0.330187671 | -           | 1.194663433 | -           |
| ACMSD     | 130013 | 1278  | 0.319853158 | -           | -           | -           |
| HIST1H2BF | 8343   | 430   | 0.95063334  | -           | 0.98271982  | -           |
| LOC10012  | 1E+08  | 1440  | 0.283869678 | 0.92846952  | 0.586902115 | 0.702877996 |
| C9orf163  | 158055 | 2587  | 0.15801018  | -           | 0.163343457 | -           |
| ZNF501    | 115560 | 3081  | 0.132675215 | -           | -           | -           |
| L1CAM     | 3897   | 5046  | 0.081009183 | 0.088320525 | 0.041871732 | -           |
| CLDN9     | 9080   | 2139  | 0.191104411 | 0.416704413 | 0.493886773 | 1.041008645 |
| GRIK5     | 2901   | 3555  | 0.114985186 | 0.125362973 | 0.059433126 | 0.056942015 |
| THEMIS    | 387357 | 3983  | 0.102629258 | -           | -           | -           |
| ZNF415    | 55786  | 2674  | 0.152869236 | -           | -           | -           |
| TTC22     | 55001  | 2249  | 0.181757375 | 0.297242354 | 0.093946092 | 0.090008387 |
| DPF3      | 8110   | 2271  | 0.179996625 | 0.490604766 | 0.279108007 | 0.445682217 |
| RSAD2     | 91543  | 3512  | 0.116393034 | 0.634489421 | 0.060160809 | 181.3329165 |
| ZNF841    | 284371 | 3876  | 0.105462419 | 0.344942236 | 0.436088259 | 0.470036059 |
| ZNF792    | 126375 | 3898  | 0.104867198 | 0.400161312 | 0.325220259 | 0.519314682 |
| SIGLEC8   | 27181  | 2967  | 0.137772948 | 0.225311107 | 0.427269487 | 4.571194411 |
| P2RY4     | 5030   | 1639  | 0.2494035   | 0.135956489 | -           | 0.370522629 |
| SPDYE2    | 441273 | 1983  | 0.206138344 | 0.224743    | -           | 0.10208213  |
| PDE3A     | 5139   | 4124  | 0.099120353 | 0.108066287 | 0.051232968 | -           |
| CCL23     | 6368   | 641   | 0.637710353 | 7.995556551 | 1.31846965  | 6.631834824 |
| SLC12A3   | 6559   | 5582  | 0.073230444 | -           | -           | -           |
| C16orf3   | 750    | 1000  | 0.408772336 | -           | 0.633854284 | 0.404857726 |
| CDH26     | 60437  | 3193  | 0.128021402 | 0.209363625 | 0.397027425 | 0.126795404 |
| TM4SF20   | 79853  | 2310  | 0.176957721 | 0.192928731 | 0.091465265 | 0.438157712 |
| LOC10013  | 1E+08  | 2253  | 0.181434681 | 0.296714627 | 0.187558599 | 0.449242927 |
| F2RL2     | 2151   | 3427  | 0.119279935 | 0.065022668 | 0.369917878 | 0.2362753   |
| C17orf88  | 23591  | 780   | 0.524067098 | 1.714097575 | 2.167023193 | 2.595241833 |
| FLJ44511  | 441307 | 3506  | 0.116592224 | -           | 0.180791296 | -           |
| FBXL22    | 283807 | 1570  | 0.260364545 | 0.283863293 | 0.538305124 | 0.257871163 |
| CDH1      | 999    | 4815  | 0.084895605 | 0.138836564 | 0.043880532 | 0.042041301 |
| LOC73142  | 731424 | 3390  | 0.12058181  | 0.262929422 | 0.436281218 | 2.985676445 |
| LOC28483  | 284837 | 4622  | 0.088440575 | 0.096422624 | 0.182851373 | 0.087593623 |
| CCDC81    | 60494  | 2788  | 0.146618485 | 0.23977692  | 0.303134521 | 0.435643177 |
| SLC1A2    | 6506   | 12021 | 0.034004853 | 0.166832557 | 0.07030522  | 0.134716821 |
| SCG2      | 7857   | 2586  | 0.158071282 | 0.258506595 | 0.081703311 | 0.939345072 |
| C16orf71  | 146562 | 2716  | 0.150505278 | 0.328177739 | 0.466755732 | 0.074531982 |
| FLJ41200  | 401492 | 2330  | 0.175438771 | 0.095636345 | 0.090680155 | 0.260638021 |
| HIST1H2A  | 8332   | 470   | 0.869728375 | 0.474112095 | 0.899084091 | -           |
| ASB11     | 140456 | 2799  | 0.146042278 | 0.318446138 | 0.226457408 | 0.289287407 |
| MTPP      | 4547   | 4093  | 0.099871081 | 0.163327157 | 0.051621002 | -           |
| LOC10012  | 1E+08  | 6057  | 0.067487591 | 0.073578565 | 0.034882741 | 0.167103238 |
| SIGLEC11  | 114132 | 3183  | 0.128423605 | 1.050106903 | 0.199137381 | 2.798262636 |
| FTLP10    | 1E+08  | 1501  | 0.272333335 | 0.148456152 | 0.140762666 | -           |
| POM121L8  | 29797  | 7716  | 0.052977234 | 0.057758602 | 0.164296082 | 0.052469897 |
| PLXNA4    | 91584  | 13061 | 0.03129717  | 0.085304603 | 0.06470707  | 0.061994905 |
| SLC19A3   | 80704  | 3775  | 0.108284063 | 0.059028526 | -           | 0.05362354  |

|           |          |       |             |             |             |             |
|-----------|----------|-------|-------------|-------------|-------------|-------------|
| FLJ33360  | 401172   | 2419  | 0.168984017 | 0.184235374 | 0.17468769  | 0.418414351 |
| HSD3BP4   | 128102   | 8697  | 0.047001533 | 0.025621787 | 0.024293982 | 0.069827135 |
| CC2D2B    | 387707   | 2124  | 0.192454019 | 0.31473543  | 0.099474935 | 0.762443928 |
| ZNF418    | 147686   | 3712  | 0.110121858 | 0.060030357 | 0.056919386 | -           |
| CPA4      | 51200    | 2817  | 0.1451091   | 0.395514172 | 0.450020791 | 0.503018119 |
| PCDHB16   | 57717    | 4827  | 0.084684553 | 0.092327609 | 0.043771444 | 0.209683927 |
| ISX       | 91464    | 3401  | 0.120191807 | -           | -           | -           |
| RENBP     | 5973     | 1507  | 0.271249062 | 0.887190517 | 1.402022305 | 14.37285225 |
| ZNF575    | 284346   | 1717  | 0.23807358  | -           | 0.246109215 | -           |
| HK3       | 3101     | 3080  | 0.132718291 | 37.76579917 | 0.685989485 | 34.63636714 |
| DYX1C1    | 161582   | 2011  | 0.203268193 | -           | -           | 0.805286377 |
| LOC33929  | 339290   | 3979  | 0.102732429 | -           | 0.10619993  | 0.101748612 |
| FAM92A3   | 403315   | 2475  | 0.16516054  | 0.180066816 | 0.256102741 | 0.245368319 |
| GNG3      | 2785     | 914   | 0.447234503 | -           | 0.69349484  | 0.66442734  |
| ADCY6     | 112      | 6583  | 0.062095144 | 0.135398867 | 0.160477564 | 0.24600196  |
| GFAP      | 2670     | 3097  | 0.131989776 | -           | 0.068222396 | 0.130725775 |
| SCG3      | 29106    | 3366  | 0.121441573 | 0.066201035 | 0.125540559 | 0.180417881 |
| POTEF     | 728378   | 4337  | 0.094252326 | 0.102758905 | -           | 0.186699436 |
| CDNF      | 441549   | 1330  | 0.307347621 | 0.335086744 | 0.476582168 | -           |
| PTPRB     | 5787     | 11332 | 0.036072391 | 0.058992063 | 0.0559349   | 0.071453887 |
| PROZ      | 8858     | 1485  | 0.275267566 | -           | -           | 0.136315733 |
| RHBDL1    | 9028     | 1559  | 0.262201627 | 0.142933088 | 0.406577475 | 0.259690652 |
| SEPT3     | 55964    | 4656  | 0.087794746 | 0.047859254 | 0.04537903  | -           |
| KCNJ1     | 3758     | 2749  | 0.148698558 | 0.081059543 | 0.076858771 | 0.073637273 |
| RBPJL     | 11317    | 2630  | 0.155426744 | -           | -           | 0.153938299 |
| MAST1     | 22983    | 4933  | 0.082864856 | -           | -           | 0.04103565  |
| BATF2     | 116071   | 2142  | 0.190836758 | 15.29243915 | 0.197278022 | 110.3813781 |
| DQX1      | 165545   | 2650  | 0.154253712 | -           | 0.079730099 | 0.07638825  |
| CLDN4     | 1364     | 1846  | 0.221436802 | 0.120711097 | 0.228910901 | 0.109658106 |
| FGF17     | 8822     | 1238  | 0.330187671 | -           | 0.170666205 | 0.163512813 |
| HIST1H3D  | 8351     | 864   | 0.47311613  | 0.2579082   | -           | 0.468585331 |
| ANK3      | 288      | 17035 | 0.023996028 | 0.013080874 | -           | 0.02376623  |
| LOC10050  | 1.01E+08 | 3087  | 0.132417342 | 0.144368438 | 0.136886791 | 0.065574624 |
| TRHR      | 7201     | 1392  | 0.293658287 | -           | 0.303570059 | 0.145423034 |
| SMAD5-AS  | 9597     | 1827  | 0.223739648 | -           | 0.231291474 | 0.221597004 |
| BAALC     | 79870    | 2859  | 0.142977382 | -           | 0.07390163  | 0.070804079 |
| FADS6     | 283985   | 2052  | 0.199206791 | 0.325778779 | 0.102965283 | 0.197299087 |
| ADRA2B    | 151      | 3288  | 0.124322487 | 0.135542996 | 0.064259356 | 0.061565956 |
| SOCS1     | 8651     | 1216  | 0.336161461 | 1.466004505 | 0.173753916 | 6.492373072 |
| ETV7      | 51513    | 1634  | 0.250166668 | -           | 0.258610479 | -           |
| FAM156B   | 727866   | 1701  | 0.240312955 | 0.262001981 | 0.621060439 | 0.119005798 |
| RD3       | 343035   | 4290  | 0.095284927 | 0.103884702 | 0.147751581 | -           |
| CCDC109B  | 55013    | 1298  | 0.314924758 | 0.515021613 | 0.325554332 | -           |
| RGS17     | 26575    | 1472  | 0.277698598 | 0.6055236   | 0.43060753  | 0.275039216 |
| LRRC6     | 23639    | 1625  | 0.251552207 | -           | -           | 0.249143216 |
| LRRC16A   | 55604    | 5431  | 0.075266495 | 0.328238166 | 0.077806946 | 0.96909417  |
| EEF1DP3   | 196549   | 575   | 0.710908411 | -           | 0.367451759 | -           |
| LOC25516  | 255167   | 3045  | 0.134243789 | 0.146359727 | -           | -           |
| CDKN1C    | 1028     | 1943  | 0.210382057 | -           | 0.108741514 | -           |
| CLEC17A   | 388512   | 2162  | 0.189071386 | 1.752153395 | 1.368171443 | 9.175776397 |
| SLPI      | 6590     | 598   | 0.683565779 | 1.49051963  | 1.059956997 | 1.354039217 |
| TEX22     | 647310   | 2571  | 0.158993519 | 0.520029603 | 0.246539978 | 0.236206375 |
| SLC13A3   | 64849    | 4084  | 0.100091169 | 0.109124723 | -           | -           |
| LOC64136  | 641367   | 2694  | 0.151734349 | 0.413572169 | 0.392139498 | 0.601125057 |
| CPN2      | 1370     | 3088  | 0.132374461 | 0.072160844 | -           | -           |
| LSP1      | 4046     | 2072  | 0.197283946 | 41.72735602 | -           | 264.6620607 |
| EFCAB10   | 1E+08    | 791   | 0.516779186 | 0.563420189 | 1.0684438   | 0.255915124 |
| FSCN2     | 25794    | 1762  | 0.23199338  | -           | -           | -           |
| RUSC1-AS1 | 284618   | 1326  | 0.308274763 | 0.840243909 | -           | -           |
| CAMKV     | 79012    | 3028  | 0.134997469 | -           | 0.837324021 | 0.066852333 |
| LINC00051 | 619434   | 1058  | 0.386363267 | -           | 0.399404086 | -           |
| PCDHB13   | 56123    | 3485  | 0.117294788 | 0.191821536 | 0.060626904 | -           |

|           |          |      |             |             |             |             |
|-----------|----------|------|-------------|-------------|-------------|-------------|
| LOC40124  | 401242   | 2785 | 0.146776422 | 0.240035208 | 0.151730529 | 0.072685409 |
| GLDN      | 342035   | 5084 | 0.080403685 | 0.525962277 | -           | 2.389010971 |
| TMPRSS3   | 64699    | 2463 | 0.16596522  | 0.180944121 | 0.171567001 | 0.410939632 |
| C8orf51   | 78998    | 2030 | 0.201365683 | 0.658618773 | 0.104081163 | 0.498593259 |
| C1R       | 715      | 2526 | 0.161825945 | 0.793940682 | 0.083644007 | 2.724695701 |
| TEX9      | 374618   | 1470 | 0.278076419 | 0.15158686  | -           | -           |
| FLJ46361  | 375940   | 3743 | 0.109209815 | 0.059533178 | 0.169343918 | -           |
| KCNQ4     | 9132     | 4116 | 0.099313007 | 0.108276329 | 0.153997639 | 0.098361935 |
| C1orf190  | 541468   | 1863 | 0.219416176 | -           | 0.34023311  | -           |
| DGCR6     | 8214     | 1245 | 0.328331194 | -           | -           | -           |
| CTHRC1    | 115908   | 1236 | 0.330721955 | 0.360570687 | 0.683769454 | 0.163777397 |
| TBX6      | 6911     | 1830 | 0.223372861 | 0.487065978 | 0.577280769 | 0.44246746  |
| LRRC29    | 26231    | 1486 | 0.275082326 | 1.049682903 | 0.426550662 | 1.226015994 |
| GPR156    | 165829   | 4200 | 0.097326747 | 0.159166203 | 0.251529478 | 0.048197348 |
| ANKRD65   | 441869   | 2042 | 0.200182339 | 0.654748339 | 0.206939041 | 0.594795875 |
| TPH1      | 7166     | 1815 | 0.225218918 | 0.368318487 | 0.232820674 | 0.223062108 |
| MATN4     | 8785     | 2270 | 0.180075919 | 0.196328357 | -           | 0.267527132 |
| PCDHGC4   | 56098    | 4623 | 0.088421444 | -           | -           | 0.043787338 |
| LINC00184 | 1E+08    | 2281 | 0.179207513 | 0.683835508 | 0.185256257 | 0.266236996 |
| THBS4     | 7060     | 3233 | 0.126437469 | 0.827093169 | 0.326762699 | 0.500906559 |
| FLJ39582  | 439931   | 2632 | 0.155308638 | 0.338651497 | 0.240826096 | -           |
| HYMAI     | 57061    | 5005 | 0.081672794 | 0.17808806  | 0.084429475 | 0.161781309 |
| GPAT2     | 150763   | 2840 | 0.143933921 | 0.706159916 | 0.223188128 | -           |
| C22orf45  | 646023   | 2568 | 0.159179259 | 0.260318557 | 0.082275997 | 0.70944695  |
| PPIAL4G   | 644591   | 738  | 0.553892054 | 0.301941307 | 0.286293715 | 0.274293852 |
| PLIN2     | 123      | 2116 | 0.193181633 | 0.421233809 | 0.599106129 | 1.052323957 |
| KYNU      | 8942     | 1774 | 0.23042409  | 0.879272149 | 0.238201535 | 5.13489224  |
| SIGLEC16  | 400709   | 1714 | 0.238490278 | 0.910051805 | 0.369809967 | 5.314643426 |
| PDE6C     | 5146     | 2980 | 0.137171925 | 0.074776069 | 0.141801853 | 0.135858297 |
| EMR3      | 84658    | 2310 | 0.176957721 | 36.17413713 | 3.201284263 | 106.3846925 |
| ASB9P1    | 728619   | 1625 | 0.251552207 | 0.68563903  | 0.520085566 | 0.747429648 |
| KLHL35    | 283212   | 1952 | 0.209412057 | 0.228312177 | -           | -           |
| TRO       | 7216     | 4665 | 0.087625367 | 0.047766921 | 0.045291482 | -           |
| ZNF470    | 388566   | 7149 | 0.057178953 | 0.03116977  | 0.088663349 | 0.028315689 |
| HLA-G     | 3135     | 1578 | 0.259044573 | 0.706060471 | 0.535576074 | 3.591893639 |
| MFI2-AS1  | 1.01E+08 | 951  | 0.429834212 | 2.108826669 | 1.999540328 | 0.425717903 |
| FLJ36777  | 730971   | 2140 | 0.19101511  | 0.312382268 | -           | 0.28377878  |
| PPP2R3A   | 5523     | 6814 | 0.05999007  | 0.098106553 | 0.03100745  | 0.029707787 |
| NPPA      | 4878     | 858  | 0.476424634 | 2.337405784 | 0.738757907 | 1.179655379 |
| C8ORFK29  | 340393   | 911  | 0.448707284 | -           | 0.231926192 | -           |
| RASAL1    | 8437     | 3841 | 0.106423415 | 0.116028474 | 1.815255695 | 2.951319012 |
| SH3GL1P2  | 6459     | 2506 | 0.163117453 | 0.266759    | 0.168623114 | 0.242333036 |
| AXDND1    | 126859   | 3642 | 0.112238423 | 0.061184153 | -           | 0.055581786 |
| PDE1A     | 5136     | 2414 | 0.169334025 | -           | -           | -           |
| PTPN21    | 11099    | 6215 | 0.065771896 | 0.107562036 | -           | -           |
| HLA-DRB1  | 3123     | 1229 | 0.332605644 | 0.181312193 | -           | -           |
| KCTD16    | 57528    | 5183 | 0.078867902 | -           | 0.040764955 | -           |
| CABP1     | 9478     | 1627 | 0.251242985 | -           | -           | 0.248836955 |
| C18orf32  | 497661   | 1669 | 0.244920513 | 0.133512693 | -           | 1.212875153 |
| DUSP15    | 128853   | 1383 | 0.295569296 | 0.161122693 | 0.152772785 | -           |
| CPNE9     | 151835   | 2066 | 0.197856891 | 0.647142356 | 0.409070206 | 0.58788634  |
| ZIM3      | 114026   | 2627 | 0.155604239 | 0.084824014 | 0.160856309 | 0.231171142 |
| C9orf43   | 257169   | 2099 | 0.19474623  | 0.318484066 | 0.301979173 | -           |
| C16orf96  | 342346   | 3426 | 0.119314751 | 0.130083295 | 0.123341951 | -           |
| TMEM25    | 84866    | 2551 | 0.160240038 | 0.087351111 | 0.331297156 | 0.317410996 |
| C15orf55  | 256646   | 3795 | 0.107713396 | 0.05871744  | 0.055674509 | 0.106681878 |
| WDFY3-AS  | 404201   | 1569 | 0.260530488 | -           | 0.134662053 | -           |
| C11orf65  | 160140   | 1033 | 0.395713781 | 0.647142356 | -           | 0.195962113 |
| C7orf65   | 401335   | 2911 | 0.140423338 | 0.153097001 | 0.14516301  | -           |
| DEGS2     | 123099   | 1411 | 0.289703994 | 0.789626806 | 0.149741149 | -           |
| PCDHGA12  | 26025    | 4774 | 0.085624704 | -           | 0.044257386 | 0.042402359 |
| TCF7      | 6932     | 3322 | 0.123050071 | 0.06707787  | 0.190805022 | 0.060935841 |

|           |          |       |             |   |             |             |             |
|-----------|----------|-------|-------------|---|-------------|-------------|-------------|
| ZNF568    | 374900   | 4125  | 0.099096324 | - |             | 0.153661645 | 0.049073664 |
| FBXO24    | 26261    | 2292  | 0.178347442 |   | 0.583331635 | 0.55310147  | 0.264959245 |
| SGPP2     | 130367   | 1200  | 0.340643613 |   | 1.299857328 | 0.704282538 | 0.168690719 |
| PRR5L     | 79899    | 3979  | 0.102732429 | - |             |             | 0.050874306 |
| POM121L1  | 25812    | 3995  | 0.102320985 |   | 0.334667361 | 0.158661898 | 0.152011662 |
| HIST1H2AJ | 8331     | 439   | 0.931144274 |   | 0.507591537 | 0.481286472 | -           |
| ABCA5     | 23461    | 9249  | 0.044196382 |   | 0.048185249 | 0.045688131 | 0.065659703 |
| TMEM200   | 114801   | 5042  | 0.08107345  |   | 0.044195296 | 0.125714852 | 0.040148525 |
| TIAM2     | 26230    | 5916  | 0.069096068 |   | 0.30132885  | 0.249998872 | 2.121465433 |
| LOC10013  | 1E+08    | 2828  | 0.144544673 |   | 0.1575903   | 0.074711726 | -           |
| MYH11     | 4629     | 6942  | 0.058883944 |   | 0.160496028 | 0.182614314 | 0.262440185 |
| LGALS9C   | 654346   | 1743  | 0.234522281 |   | 9.460481165 | -           | 9.639469665 |
| DLEC1     | 9940     | 5632  | 0.072580315 |   | 0.039565462 | -           | -           |
| GLI1      | 2735     | 3618  | 0.112982956 |   | 0.615900179 | 0.233592882 | 0.559504873 |
| LRRC37A   | 9884     | 5177  | 0.078959308 | - |             | -           | -           |
| SHANK2    | 22941    | 10641 | 0.038414842 | - |             | 0.039711448 | 1.80723071  |
| LOC10012  | 1E+08    | 3681  | 0.111049263 |   | 0.36321546  | 0.11479748  | 0.274964497 |
| C1S       | 716      | 2850  | 0.14342889  |   | 0.312747628 | 0.222405012 | 0.852332055 |
| SVOPL     | 136306   | 1804  | 0.226592204 |   | 0.494085775 | 0.117120156 | 0.448844485 |
| THAP10    | 56906    | 2119  | 0.192908134 | - |             | -           | -           |
| HSPE1-MO  | 1.01E+08 | 4279  | 0.095529875 | - |             | -           | 0.047307516 |
| CARD14    | 79092    | 3916  | 0.104385173 |   | 0.056903137 | -           | -           |
| SOX2-OT   | 347689   | 2529  | 0.16163398  |   | 0.088110986 | 0.16708957  | -           |
| ALDH1A1   | 216      | 2378  | 0.171897534 | - |             | 0.088849773 | 0.085125678 |
| MTRNR2L6  | 1E+08    | 1395  | 0.293026764 |   | 1.118156841 | 0.15145861  | -           |
| NIPSNAP3  | 55335    | 1781  | 0.229518437 |   | 0.250233223 | 0.593163283 | 1.022942036 |
| LOC64632  | 646324   | 3690  | 0.110778411 | - |             | 0.057258743 | 0.164576311 |
| N4BP3     | 23138    | 5987  | 0.068276655 |   | 0.148877691 | 0.10587177  | 0.338114019 |
| RIN2      | 54453    | 4259  | 0.095978478 |   | 0.052320424 | 1.091398157 | 12.02500642 |
| LCA5L     | 150082   | 2364  | 0.17291554  |   | 0.094260865 | 0.178751913 | 0.25688942  |
| SPRNP1    | 399833   | 2403  | 0.17010917  |   | 0.185462076 | 0.263776231 | -           |
| GTF2IRD2  | 389524   | 3595  | 0.113705796 |   | 0.185952171 | 0.235087356 | 0.112616892 |
| WFDC8     | 90199    | 1269  | 0.32212162  |   | 0.702388289 | 0.499491162 | 0.319036821 |
| ARL17B    | 1.01E+08 | 488   | 0.83764823  |   | 0.456624354 | 0.432960577 | 1.659252975 |
| MAGEA8    | 4107     | 2139  | 0.191104411 |   | 0.104176103 | -           | -           |
| PROM2     | 150696   | 4739  | 0.086257087 |   | 0.18808414  | 0.312089751 | 0.29900866  |
| MUC22     | 1.01E+08 | 6005  | 0.068071996 |   | 0.14843143  | 0.105554419 | 0.033710052 |
| GPR12     | 2835     | 4863  | 0.084057647 |   | 0.045822061 | -           | 0.208131671 |
| LRAT      | 9227     | 4909  | 0.083269981 |   | 0.181570735 | 0.172161142 | 0.082472546 |
| CCDC39    | 339829   | 3894  | 0.104974919 |   | 0.343347742 | 0.162777166 | 0.259924066 |
| UTY       | 7404     | 4334  | 0.094317567 | - |             | 0.097501044 | 0.140121502 |
| PLIN5     | 440503   | 2445  | 0.16718705  |   | 4.830319956 | -           | 7.782541152 |
| PFN2      | 5217     | 2117  | 0.193090381 |   | 0.105258708 | -           | 0.286861875 |
| STAT4     | 6775     | 2761  | 0.148052277 | - |             | 0.076524723 | 0.586537814 |
| CYP2S1    | 29785    | 2657  | 0.153847323 |   | 0.083866272 | -           | -           |
| SYP       | 6855     | 2449  | 0.16691398  |   | 0.636924783 | 0.345095568 | 0.578604345 |
| LY96      | 23643    | 642   | 0.636717034 | - |             | 1.316415959 | 13.24300973 |
| CES1P1    | 51716    | 2259  | 0.180952783 |   | 0.09864218  | 0.467651088 | 0.985709381 |
| ERBB4     | 2066     | 11941 | 0.034232672 | - |             | 0.017694059 | -           |
| LRRC70    | 1E+08    | 2290  | 0.178503204 |   | 0.291920548 | 0.184528176 | 0.088396883 |
| LOC25688  | 256880   | 1985  | 0.205930648 |   | 0.112258279 | 0.319322057 | 0.305937828 |
| AHNAK2    | 113146   | 18317 | 0.022316555 |   | 0.012165348 | 0.080744299 | -           |
| IER5L     | 389792   | 2724  | 0.150063266 |   | 0.736231337 | 0.465384937 | 7.579935397 |
| CASQ1     | 844      | 1993  | 0.205104032 |   | 0.223615338 | 0.106013428 | 0.203139852 |
| C1orf114  | 399726   | 2006  | 0.203774844 |   | 0.111083093 | 0.421305606 | -           |
| C6orf81   | 221481   | 1184  | 0.345246905 | - |             | 0.356899935 | 0.341940647 |
| TMC3      | 342125   | 3303  | 0.123757898 | - |             | -           | -           |
| CASC1     | 55259    | 2651  | 0.154195525 |   | 0.420280431 | 0.318800093 | 0.229078306 |
| FLJ43315  | 644316   | 2521  | 0.1621469   |   | 0.088390593 | 0.083809901 | 0.08029705  |
| EID3      | 493861   | 1447  | 0.282496431 |   | 0.769981634 | -           | 0.839373309 |
| CD22      | 933      | 3300  | 0.123870405 |   | 0.270100224 | -           | 2.330999028 |
| DLEU7     | 220107   | 1180  | 0.346417234 | - |             | -           | 0.514649652 |



|           |          |       |             |             |             |   |             |
|-----------|----------|-------|-------------|-------------|-------------|---|-------------|
| TPTE2P3   | 220115   | 2627  | 0.155604239 | 0.084824014 | -           | - |             |
| SHANK3    | 85358    | 7145  | 0.057210964 | 0.062374439 | 0.118283981 |   | 0.113326165 |
| LOC100287 | 1E+08    | 960   | 0.425804517 | 0.92846952  | -           | - |             |
| CELF3     | 11189    | 5593  | 0.073086418 | 0.119524058 | 0.113329927 |   | 0.180966264 |
| C3orf45   | 132228   | 1526  | 0.26787178  | -           | -           |   | 0.132653252 |
| PKIB      | 5570     | 1909  | 0.214129039 | -           | 0.332034722 |   | 0.530196079 |
| MDS2      | 259283   | 1027  | 0.398025644 | 1.084871883 | 0.4114601   |   | 0.197106975 |
| CLDN14    | 23562    | 1233  | 0.331526631 | -           | -           | - |             |
| ADAM33    | 80332    | 3594  | 0.113737434 | 0.124002607 | 0.117576384 | - |             |
| RPL36A-HN | 1.01E+08 | 2659  | 0.153731604 | 0.083803191 | -           | - |             |
| LOC100507 | 1.01E+08 | 1084  | 0.377096251 | 0.822260829 | 0.194912141 |   | 0.186742494 |
| HIST1H2AC | 8969     | 498   | 0.820827984 | -           | 0.424266589 |   | 1.625934642 |
| CA12      | 771      | 3992  | 0.10239788  | 0.055819811 | 0.688051578 |   | 0.202834532 |
| ANG       | 283      | 1222  | 0.167255457 | 0.364701612 | -           |   | 1.65653734  |
| XCL1      | 6375     | 1367  | 0.149514388 | -           | -           | - |             |
| SCARNA15  | 677778   | 127   | 1.609339906 | -           | -           |   | 1.593928055 |
| FRMPD2P1  | 728798   | 1947  | 0.104974919 | -           | -           | - |             |
| NPFF      | 8620     | 592   | 0.345246905 | 3.011252497 | 2.141399608 |   | 2.393584528 |
| TNFRSF19  | 55504    | 4523  | 0.045188187 | 0.098533135 | -           | - |             |
| MYOZ2     | 51778    | 2616  | 0.078129269 | 0.08518069  | -           |   | 0.154762128 |
| SLC46A2   | 57864    | 2518  | 0.081170043 | 0.26548771  | -           |   | 0.562749023 |
| RNF224    | 643596   | 1514  | 0.134997469 | -           | -           |   | 0.133704665 |
| SNHG9     | 735301   | 345   | 0.592423675 | 3.875351039 | 4.899356785 | - |             |
| LRRC72    | 1.01E+08 | 937   | 0.218128248 | -           | -           | - |             |
| CYP2B7P1  | 1556     | 3000  | 0.068128723 | 0.297110246 | 0.211284761 |   | 0.269905151 |
| TTC25     | 83538    | 2298  | 0.088940891 | 0.290904288 | 0.45971445  |   | 0.176178297 |
| TDH       | 157739   | 1357  | 0.150616189 | -           | -           | - |             |
| HSP90AA4  | 3323     | 1257  | 0.162598383 | -           | 0.504259574 | - |             |
| C6orf165  | 154313   | 2215  | 0.092273665 | -           | -           | - |             |
| FRMD4B    | 23150    | 5261  | 0.0388493   | 0.296489031 | 0.080321141 |   | 0.731067933 |
| FPR2      | 2358     | 2019  | 0.101231386 | 0.882942783 | -           |   | 7.519645726 |
| SP6       | 80320    | 3794  | 0.053870893 | 0.176198749 | -           | - |             |
| LRP1      | 4035     | 14905 | 0.013712591 | 0.044850591 | 0.014175428 |   | 0.040743817 |
| PLIN4     | 729359   | 6353  | 0.032171599 | 1.403007617 | 0.033257479 |   | 2.740261642 |
| ZNF860    | 344787   | 3210  | 0.063671703 | -           | 0.197462394 | - |             |
| SPATA3    | 130560   | 921   | 0.221917663 | -           | 0.229407993 | - |             |
| GGT3P     | 2679     | 2036  | 0.100386134 | -           | 0.103774441 |   | 0.198849571 |
| MC4R      | 4160     | 1438  | 0.142132245 | -           | -           | - |             |
| SAMD12    | 401474   | 8884  | 0.023006097 | -           | 0.023782616 |   | 0.068357338 |
| HNMT      | 3176     | 3373  | 0.060594773 | 1.32127296  | 0.250560049 |   | 0.720173838 |
| C1QTNF7   | 114905   | 4530  | 0.045118359 | 0.098380876 | -           |   | 0.13405885  |
| S1PR1     | 1901     | 3050  | 0.067011858 | -           | -           | - |             |
| AXL       | 558      | 4743  | 0.043092171 | 0.281888279 | 0.1781866   |   | 0.512153986 |
| CHST3     | 9469     | 6978  | 0.029290079 | 0.031933603 | -           | - |             |
| LOC338963 | 338963   | 1381  | 0.147998673 | 0.161356035 | -           | - |             |
| LOC647859 | 647859   | 578   | 0.353609287 | 0.771047352 | 0.36554457  |   | 0.350222946 |
| LAIR2     | 3904     | 702   | 0.291148388 | 1.269701907 | 1.203901774 |   | 1.153440815 |
| CILP      | 8483     | 4484  | 0.045581215 | -           | 0.047119706 | - |             |
| TEX12     | 56158    | 1144  | 0.178659238 | 0.779135261 | 0.55406843  |   | 0.353896614 |
| SCARNA20  | 677681   | 130   | 1.572201293 | 3.42819515  | -           | - |             |
| KCNE2     | 9992     | 809   | 0.252640504 | 1.101768528 | 0.261167814 |   | 1.000884366 |
| POLR2J2   | 246721   | 1714  | 0.119245139 | 0.130007401 | 0.493079957 |   | 0.118103187 |
| CA9       | 768      | 1561  | 0.130932843 | 0.142749958 | 0.406056556 | - |             |
| KRTAP5-10 | 387273   | 1058  | 0.193181633 | -           | -           | - |             |
| TAS1R3    | 83756    | 2559  | 0.079869546 | -           | -           |   | 0.15820935  |
| MNX1      | 3110     | 2176  | 0.093927467 | -           | -           | - |             |
| TAS2R46   | 259292   | 930   | 0.219770073 | 0.239605037 | 1.135939577 |   | 0.217665444 |
| UGT2B15   | 7366     | 2144  | 0.095329369 | -           | -           |   | 0.094416447 |
| LOC115110 | 115110   | 2216  | 0.092232025 | 0.905006391 | -           |   | 2.009672827 |
| GDAP1L1   | 78997    | 2244  | 0.09108118  | 0.099301553 | -           | - |             |
| KCNK12    | 56660    | 1449  | 0.141053256 | -           | -           | - |             |
| EPHX3     | 79852    | 1810  | 0.112920535 | -           | -           |   | 0.559195754 |

|           |          |       |             |             |             |             |
|-----------|----------|-------|-------------|-------------|-------------|-------------|
| LOC65434  | 654342   | 613   | 0.333419524 | -           | 1.378693386 | -           |
| MFSD7     | 84179    | 1935  | 0.105625927 | 0.921272082 | -           | 0.209228799 |
| GRAMD3    | 65983    | 2977  | 0.068655078 | -           | -           | -           |
| S100A3    | 6274     | 738   | 0.276946027 | -           | 0.572587429 | -           |
| KLHL1     | 57626    | 4159  | 0.049143104 | -           | -           | -           |
| NRTN      | 4902     | 1141  | 0.179128982 | -           | 0.370350151 | -           |
| FBXW4P1   | 26226    | 2256  | 0.090596706 | 0.098773353 | 0.187309186 | -           |
| CD8A      | 925      | 3177  | 0.064333071 | -           | -           | -           |
| PRR16     | 51334    | 1798  | 0.113674176 | 0.12393364  | -           | -           |
| RBP1      | 5947     | 1487  | 0.137448667 | 0.89912314  | 0.710439682 | 0.816794336 |
| KRT85     | 3891     | 2491  | 0.082049847 | -           | -           | -           |
| ZNF559-ZN | 1.01E+08 | 2856  | 0.071563784 | -           | -           | -           |
| ADAM21P   | 145241   | 2049  | 0.099749228 | -           | -           | -           |
| MANSC4    | 1E+08    | 1095  | 0.186654035 | 0.814000675 | -           | 0.554599625 |
| KCNQ1DN   | 55539    | 1109  | 0.184297717 | -           | -           | -           |
| OOEP      | 441161   | 689   | 0.296641753 | -           | 0.306654225 | -           |
| SCARNA7   | 677767   | 330   | 0.619352024 | 2.025751679 | 1.280513705 | 1.226841594 |
| THSD7B    | 80731    | 5846  | 0.034961712 | -           | -           | -           |
| OMD       | 4958     | 2542  | 0.080403685 | -           | 0.24935259  | 0.238901097 |
| IL36G     | 56300    | 1180  | 0.173208617 | -           | 0.179054883 | 0.171549884 |
| PGF       | 5228     | 1911  | 0.106952469 | -           | 0.552812039 | 0.423712952 |
| LOC10024  | 1E+08    | 502   | 0.407143761 | -           | 0.420885979 | -           |
| HOXD10    | 3236     | 1814  | 0.112671537 | -           | 0.11647451  | -           |
| KIT       | 3815     | 5190  | 0.039380765 | 0.042935007 | -           | -           |
| KCNC1     | 3746     | 6807  | 0.03002588  | 0.032735814 | -           | -           |
| JPH3      | 57338    | 3997  | 0.051134893 | 0.111499967 | -           | 0.0506452   |
| C4orf36   | 132989   | 922   | 0.221676972 | -           | -           | 0.219554081 |
| PRKCG     | 5582     | 3143  | 0.065029007 | 0.070898086 | -           | 0.064406256 |
| HAPLN3    | 145864   | 1893  | 0.10796945  | 0.117714044 | -           | 0.855483837 |
| SLC12A7   | 10723    | 5316  | 0.03844736  | -           | 0.079490128 | 0.114237507 |
| SP5       | 389058   | 1963  | 0.104119291 | -           | -           | -           |
| FXYD6     | 53826    | 2229  | 0.091694109 | 2.599214806 | 0.094789036 | 28.87948785 |
| LOC64939  | 649395   | 1828  | 0.111808626 | -           | -           | 0.11073789  |
| SAMD13    | 148418   | 1580  | 0.129358334 | 1.269300103 | 0.53489813  | -           |
| SLX1B-SUL | 1.01E+08 | 2214  | 0.092315342 | 0.100647102 | -           | 0.091431284 |
| PHOX2A    | 401      | 1716  | 0.119106159 | -           | -           | -           |
| SAMD14    | 201191   | 1893  | 0.10796945  | -           | -           | 0.10693548  |
| KLK7      | 5650     | 2104  | 0.097141715 | 0.529545353 | 0.200841028 | 0.865902931 |
| HOMER2    | 9455     | 2005  | 0.101938238 | 0.333415488 | 0.210757867 | 0.403848106 |
| MAOA      | 4128     | 4090  | 0.049972168 | -           | -           | -           |
| TANC1     | 85461    | 7517  | 0.027189859 | 0.059287664 | 0.112430364 | 0.026929475 |
| SCARNA8   | 677776   | 131   | 1.560199756 | 3.402025721 | 6.451443095 | -           |
| PRG3      | 10394    | 886   | 0.230684163 | 0.503008318 | 0.476940771 | 1.599325102 |
| CD226     | 10666    | 2664  | 0.076721535 | -           | 0.079311097 | 0.455920863 |
| HIST1H2BL | 8340     | 453   | 0.451183594 | 0.491904381 | 0.932824553 | 0.446862832 |
| SSPO      | 23145    | 15580 | 0.013118496 | -           | -           | 0.051971467 |
| SLC22A14  | 9389     | 1977  | 0.103381977 | 0.112712537 | -           | 0.204783878 |
| MYBPC1    | 4604     | 3938  | 0.051901008 | -           | -           | -           |
| GRM5      | 2915     | 7927  | 0.025783546 | 0.028110595 | -           | -           |
| IFITM4P   | 340198   | 342   | 0.597620374 | 0.651557558 | -           | -           |
| UPP2      | 151531   | 2413  | 0.0847021   | -           | -           | -           |
| DNAH12    | 201625   | 9542  | 0.021419636 | 0.046705656 | 0.044285215 | 0.190930598 |
| IGSF11    | 152404   | 3577  | 0.05713899  | 0.06229597  | 0.059067588 | -           |
| CIB2      | 10518    | 1580  | 0.129358334 | -           | -           | 0.128119534 |
| CXCR3     | 2833     | 1914  | 0.106784832 | 0.11642251  | 0.110389113 | 0.105762206 |
| IGLON5    | 402665   | 3100  | 0.065931022 | 0.071881511 | 0.068156375 | 0.130599266 |
| GSTO2     | 119391   | 1546  | 0.132203213 | 0.288269967 | -           | 0.130937169 |
| C4A       | 720      | 5426  | 0.037667926 | -           | -           | 0.037307199 |
| OLR1      | 4973     | 2533  | 0.080689368 | 1.319577683 | -           | 13.26616315 |
| TPSB2     | 64499    | 1165  | 0.175438771 | -           | 1.632242792 | -           |
| FLJ16341  | 400957   | 1705  | 0.119874585 | -           | -           | -           |
| RHCE      | 6006     | 1618  | 0.126320252 | 0.413163198 | 0.261167814 | 0.625552729 |

|           |          |      |             |             |             |             |
|-----------|----------|------|-------------|-------------|-------------|-------------|
| FBXL2     | 25827    | 3000 | 0.068128723 | -           | -           | 0.202428863 |
| MGC16025  | 85009    | 2127 | 0.096091287 | -           | 0.198669263 | -           |
| ODF3L1    | 161753   | 1249 | 0.163639846 | -           | -           | -           |
| ALOX12B   | 242      | 2502 | 0.081689116 | -           | -           | -           |
| EXT1      | 2131     | 3376 | 0.060540927 | -           | -           | 1.07930081  |
| C17orf78  | 284099   | 1895 | 0.107855498 | 0.117589807 | -           | 0.213645238 |
| FEZ1      | 9638     | 1836 | 0.111321442 | 0.242737129 | 0.460315384 | 0.661532232 |
| COL25A1   | 84570    | 2681 | 0.07623505  | -           | -           | -           |
| KRTAP3-2  | 83897    | 749  | 0.272878729 | -           | -           | -           |
| GOS2      | 50486    | 978  | 0.208983812 | 1.822762247 | -           | 15.93765076 |
| DOC2GP    | 390213   | 434  | 0.470935871 | -           | -           | -           |
| FAM184A   | 79632    | 4057 | 0.050378646 | 0.164776449 | -           | 0.09979239  |
| RRAS2     | 22800    | 2360 | 0.086604308 | 0.094420629 | 0.089527441 | 0.343099768 |
| ABHD11-A  | 171022   | 473  | 0.432106064 | -           | 0.446690827 | 1.283903993 |
| KDM5D     | 8284     | 5595 | 0.036530146 | 0.039827111 | 0.037763139 | -           |
| C4orf40   | 401137   | 4814 | 0.04245662  | -           | 0.043889647 | -           |
| GRPR      | 2925     | 2681 | 0.07623505  | 0.166231022 | -           | 0.151009969 |
| PCDHGB5   | 56101    | 4578 | 0.044645297 | 0.04867468  | -           | 0.044217751 |
| ACSM2A    | 123876   | 2969 | 0.06884007  | 0.07505311  | -           | -           |
| KCNK7     | 10089    | 1577 | 0.129604419 | 0.282603278 | 0.133978923 | 0.256726522 |
| DYDC2     | 84332    | 1842 | 0.110958832 | -           | -           | -           |
| DUOX1     | 53905    | 5693 | 0.035901312 | 0.039141522 | -           | 0.142230011 |
| LOC100133 | 1E+08    | 2024 | 0.100981308 | -           | -           | -           |
| RAET1G    | 353091   | 1144 | 0.178659238 | -           | -           | -           |
| CACNA1G   | 8913     | 7834 | 0.026089631 | -           | -           | -           |
| GC        | 2638     | 2024 | 0.100981308 | -           | 0.104389704 | -           |
| FSIP1     | 161835   | 2813 | 0.072657721 | 0.316861265 | 0.075110118 | -           |
| CABP7     | 164633   | 3001 | 0.068106021 | -           | -           | 0.067453803 |
| CASP5     | 838      | 1488 | 0.137356296 | -           | -           | 0.408122708 |
| MFI2      | 4241     | 1696 | 0.120510712 | -           | -           | -           |
| PEX11G    | 92960    | 1143 | 0.178815545 | 0.58486269  | 0.18485106  | 0.885515586 |
| TCTE3     | 6991     | 747  | 0.273609328 | 0.29830346  | 0.282844393 | 0.541978214 |
| HOXD9     | 3235     | 1902 | 0.107458553 | -           | -           | -           |
| FBXW10    | 10517    | 3449 | 0.059259544 | -           | -           | -           |
| RRAD      | 6236     | 1476 | 0.138473014 | -           | -           | 0.274293852 |
| PRR25     | 388199   | 1209 | 0.169053902 | -           | -           | -           |
| TCTE1     | 202500   | 1686 | 0.121225485 | -           | -           | 0.600322844 |
| RNY4P8    | 1E+08    | 95   | 2.151433348 | -           | -           | -           |
| KGFLP2    | 654466   | 4723 | 0.043274649 | 0.094360654 | 0.089470574 | 0.171440917 |
| SRCIN1    | 80725    | 7050 | 0.028990946 | 0.600541987 | 0.02996947  | 1.579232264 |
| UCA1      | 652995   | 1441 | 0.141836341 | 0.463912598 | -           | -           |
| SLC9A7    | 84679    | 2200 | 0.092902804 | 1.721888928 | -           | 3.680524781 |
| HOXA2     | 3199     | 1791 | 0.114118463 | 0.497672104 | -           | 1.921435327 |
| P2RY12    | 64805    | 1502 | 0.136076011 | 0.148357313 | -           | -           |
| CD27      | 939      | 1320 | 0.154838006 | 0.50643792  | 0.320128426 | 0.766775996 |
| COL19A1   | 1310     | 8725 | 0.023425349 | -           | -           | -           |
| MYLK-AS1  | 1.01E+08 | 771  | 0.265092306 | 0.289017749 | 0.274039898 | 0.262553648 |
| TAS2R3    | 50831    | 1101 | 0.185636847 | -           | 0.383805198 | -           |
| ADAMTSL5  | 339366   | 2867 | 0.071289211 | 0.310893177 | 0.884345007 | 0.494245567 |
| KCNN1     | 3780     | 2657 | 0.076923661 | -           | -           | 0.076187001 |
| TUBA3C    | 7278     | 1564 | 0.130681693 | -           | -           | -           |
| RFTN2     | 130132   | 3131 | 0.06527824  | 0.213509439 | 0.067481559 | 0.064653102 |
| HIST1H4L  | 8368     | 364  | 0.561500462 | -           | -           | -           |
| RPS10-NU  | 1.01E+08 | 2529 | 0.08081699  | -           | -           | -           |
| CCDC89    | 220388   | 2428 | 0.084178817 | -           | -           | -           |
| C2orf54   | 79919    | 2525 | 0.080945017 | -           | -           | -           |
| EPB49     | 2039     | 2825 | 0.072349086 | -           | 0.37395533  | -           |
| LOC100133 | 1E+08    | 701  | 0.29156372  | -           | -           | -           |
| LENEP     | 55891    | 671  | 0.304599356 | -           | 0.314880419 | -           |
| CRMP1     | 1400     | 3155 | 0.06478167  | -           | -           | -           |
| TMPRSS11  | 644759   | 5897 | 0.034659347 | -           | -           | -           |
| LIP1      | 149998   | 1636 | 0.124930421 | -           | -           | -           |

|          |        |       |             |             |             |             |
|----------|--------|-------|-------------|-------------|-------------|-------------|
| GOLGA6L1 | 647042 | 3548  | 0.057606023 | 0.125610307 | -           | -           |
| JPH4     | 84502  | 4404  | 0.046409212 | -           | -           | -           |
| HNRNPA3F | 10151  | 3006  | 0.067992737 | 0.074129303 | 0.140575357 | 0.067341604 |
| PDZD9    | 255762 | 1341  | 0.15241325  | 0.664676166 | 0.630230459 | 0.301907327 |
| AK8      | 158067 | 2185  | 0.09354058  | 0.101982922 | -           | 0.092644789 |
| VCX      | 26609  | 976   | 0.209412057 | 0.228312177 | 0.216480288 | -           |
| PTGER1   | 5731   | 1458  | 0.140182557 | -           | 0.289828205 | 0.138840098 |
| TAS2R13  | 50838  | 1637  | 0.124854104 | 0.272245186 | 0.129068272 | -           |
| PABPC3   | 5042   | 2430  | 0.084109534 | 0.366802773 | 0.260845384 | 0.249912176 |
| TEKT5    | 146279 | 1609  | 0.127026829 | -           | 0.393942998 | -           |
| UQCRHL   | 440567 | 538   | 0.379899941 | -           | -           | -           |
| C8orf46  | 254778 | 3471  | 0.058883944 | -           | -           | 0.058320041 |
| LOC39975 | 399753 | 2141  | 0.095462946 | 0.104078788 | 0.296055247 | 0.283646235 |
| LOC15019 | 150197 | 2206  | 0.092650122 | -           | 0.191554634 | -           |
| MEIS3    | 56917  | 2174  | 0.094013877 | -           | 0.097187103 | 0.186227105 |
| GFRA1    | 2674   | 9580  | 0.021334673 | -           | 0.044109554 | 0.021130361 |
| LOC28559 | 285593 | 1781  | 0.114759218 | -           | -           | -           |
| tAKR     | 389932 | 1408  | 0.145160631 | 0.47478555  | -           | 0.287540999 |
| FSD2     | 123722 | 2493  | 0.081984022 | 0.268150042 | 0.169502416 | 0.081198902 |
| CA7      | 766    | 1715  | 0.119175608 | -           | -           | -           |
| NOXO1    | 124056 | 1587  | 0.128787756 | 0.14041127  | 0.133134695 | 0.127554419 |
| MARCKS   | 4082   | 4304  | 0.047487493 | 0.31064036  | -           | 2.398669147 |
| CCDC42B  | 387885 | 1514  | 0.134997469 | 0.29436286  | 0.139554004 | 0.133704665 |
| CD80     | 941    | 2757  | 0.074133539 | 0.080824333 | 0.153271499 | 2.643249571 |
| LAG3     | 3902   | 1995  | 0.102449207 | 0.335086744 | 0.211814297 | 11.7702998  |
| MGC16275 | 85001  | 2501  | 0.081721779 | -           | 0.168960225 | 0.08093917  |
| LOC64874 | 648740 | 1988  | 0.102809944 | 0.112088876 | -           | 0.101825384 |
| ARHGAP44 | 9912   | 4273  | 0.047832007 | 0.156447005 | -           | -           |
| HHIPL2   | 79802  | 2582  | 0.079158082 | -           | 0.081829884 | -           |
| LIPC     | 3990   | 1614  | 0.126633314 | 0.276124764 | 0.130907535 | 1.003364872 |
| ALDH2    | 217    | 2076  | 0.098451911 | 0.107337517 | 0.712424533 | 0.097509086 |
| LOC38659 | 386597 | 2348  | 0.08704692  | 0.189806375 | 0.179969984 | 0.172426629 |
| DEFA3    | 1668   | 501   | 0.407956423 | 59.15518377 | 4.217260706 | 52.93050109 |
| PCDHGB4  | 8641   | 4578  | 0.044645297 | 0.09734936  | 0.092304396 | 0.132653252 |
| C19orf34 | 255193 | 1313  | 0.155663494 | 0.339425262 | 0.160917564 | 0.616691129 |
| TMEM92   | 162461 | 2782  | 0.07346735  | 0.720882158 | 0.151894149 | 1.018693056 |
| RHO      | 6010   | 2768  | 0.073838934 | -           | 0.0763312   | -           |
| PYGO1    | 26108  | 1260  | 0.162211244 | -           | -           | -           |
| ZBTB32   | 27033  | 1960  | 0.104278657 | 0.113690145 | 0.107798348 | 0.309840096 |
| PRDM6    | 93166  | 3027  | 0.067521033 | -           | 0.069800053 | -           |
| WDR86    | 349136 | 2056  | 0.099409615 | -           | -           | -           |
| ODF3B    | 440836 | 970   | 0.21070739  | 0.459448835 | 1.089096708 | 15.02564756 |
| CCL1     | 6346   | 542   | 0.377096251 | -           | 0.779648566 | 0.373484987 |
| DNAH7    | 56171  | 12408 | 0.016472128 | 0.035917583 | 0.051084323 | 0.032628766 |
| GTF2IP1  | 2970   | 3638  | 0.056180915 | 0.061251425 | -           | 0.055642898 |
| COLEC11  | 78989  | 1399  | 0.146094473 | -           | -           | 0.144695399 |
| LOC91450 | 91450  | 1016  | 0.201167488 | 0.877294034 | 0.207957442 | 0.597723021 |
| FAM159B  | 1E+08  | 967   | 0.211361084 | -           | -           | -           |
| FABP2    | 2169   | 2271  | 0.089998313 | -           | 0.093036002 | -           |
| GPR37L1  | 9283   | 2459  | 0.083117596 | 0.271857688 | 0.34369217  | 0.493929718 |
| PKLR     | 5313   | 3053  | 0.06694601  | -           | -           | -           |
| GPC1     | 2817   | 3686  | 0.055449313 | 0.120907588 | 0.114641759 | -           |
| C15orf48 | 84419  | 929   | 0.220006639 | 0.479725909 | -           | 0.217899745 |
| NPAS4    | 266743 | 3302  | 0.061897689 | -           | -           | -           |
| PDGFRL   | 5157   | 1923  | 0.106285059 | -           | -           | 0.105267219 |
| DDX11L9  | 1E+08  | 1652  | 0.123720441 | -           | 0.127896345 | -           |
| CD36     | 948    | 4727  | 0.04323803  | 2.40416055  | 2.637148492 | 9.721039114 |
| ANXA2P1  | 303    | 1343  | 0.152186276 | -           | 0.157322979 | -           |
| CCDC3    | 83643  | 2753  | 0.074241252 | -           | -           | 0.073530281 |
| GPR172B  | 55065  | 2429  | 0.084144161 | 0.275215337 | 0.086984257 | 0.500030127 |
| ANXA2P2  | 304    | 1310  | 0.156019976 | 0.170101286 | 0.322572155 | 0.15452585  |
| ROBO1    | 6091   | 7550  | 0.027071016 | -           | -           | -           |

|           |          |      |             |             |             |             |   |
|-----------|----------|------|-------------|-------------|-------------|-------------|---|
| GCGR      | 2642     | 2051 | 0.099651959 | -           | -           | -           | - |
| TM7SF4    | 81501    | 1952 | 0.104706029 | 8.904174903 | 0.432960577 | 55.37756804 |   |
| FCRLA     | 84824    | 2375 | 0.086057334 | 0.187648577 | 0.088962005 | 0.596632438 |   |
| IGSF6     | 10261    | 1058 | 0.193181633 | 0.631850713 | -           | 9.757913054 |   |
| GABRB1    | 2560     | 2226 | 0.091817686 | -           | -           | -           |   |
| LOC10050  | 1.01E+08 | 2425 | 0.084282956 | 2.572913473 | 1.30691605  | 5.008549187 |   |
| LINC00242 | 401288   | 2418 | 0.084526951 | -           | -           | -           |   |
| HIST1H2AM | 8336     | 487  | 0.419684123 | 0.915123962 | 3.470796901 | 0.831330033 |   |
| ZDHHC22   | 283576   | 3408 | 0.059972467 | -           | 0.061996702 | 0.178194422 |   |
| TNFRSF8   | 943      | 3686 | 0.055449313 | 1.81361382  | 0.114641759 | 7.413970835 |   |
| NES       | 10763    | 5591 | 0.036556281 | -           | -           | -           |   |
| C2orf82   | 389084   | 480  | 0.425804517 | 0.92846952  | -           | 0.421726798 |   |
| SPANXA2-0 | 619455   | 1713 | 0.119314751 | 0.130083295 | 0.370025852 | 0.118172132 |   |
| OR10P1    | 121130   | 942  | 0.216970454 | -           | -           | -           |   |
| NFIB      | 4781     | 8507 | 0.024025646 | 0.078582115 | -           | 0.071386692 |   |
| TGM4      | 7047     | 3027 | 0.067521033 | 0.073615026 | 0.069800053 | 0.066874418 |   |
| CHIT1     | 1118     | 2325 | 0.087908029 | -           | -           | -           |   |
| ZFP2      | 80108    | 2405 | 0.084983854 | -           | 0.087852292 | -           |   |
| MAGEA1    | 4100     | 1755 | 0.116459355 | -           | -           | -           |   |
| LINC00161 | 118421   | 880  | 0.232257009 | -           | -           | -           |   |
| SCUBE3    | 222663   | 5115 | 0.039958195 | 0.043564552 | 0.041306894 | 0.039575535 |   |
| SRL       | 6345     | 4219 | 0.048444221 | 0.158449408 | 0.100158692 | 0.143940884 |   |
| CDKN2B-A  | 1E+08    | 3857 | 0.052990969 | -           | -           | 0.104967002 |   |
| GDF6      | 392255   | 3716 | 0.05500166  | -           | 0.056858117 | -           |   |
| GPR63     | 81491    | 2198 | 0.092987338 | 0.304139242 | 0.19225183  | 0.184193688 |   |
| ACTR3C    | 653857   | 1298 | 0.157462379 | -           | -           | -           |   |
| LOC14448  | 144481   | 574  | 0.356073463 | 0.776420504 | 1.472367675 | 1.763317622 |   |
| LOC14474  | 144742   | 2291 | 0.089212644 | 0.194528751 | 0.276671447 | -           |   |
| PDIA2     | 64714    | 1726 | 0.118416088 | -           | 0.122412956 | -           |   |
| C19orf21  | 126353   | 2907 | 0.070308279 | -           | -           | 0.696349718 |   |
| MPZL3     | 196264   | 983  | 0.207920822 | 0.453372705 | -           | 1.441507671 |   |
| ABCC13    | 150000   | 2839 | 0.07199231  | 0.07848985  | 0.074422248 | 0.142605751 |   |
| CHRNE     | 1145     | 2460 | 0.083083808 | 0.181164784 | 0.085888114 | 0.246864467 |   |
| KCNS1     | 3787     | 4556 | 0.04486088  | -           | -           | 0.088862539 |   |
| BTNL8     | 79908    | 2239 | 0.091284577 | 0.398093229 | -           | 0.542462339 |   |
| LAMP3     | 27074    | 3341 | 0.061175148 | 0.200089211 | 0.063239976 | 0.18176791  |   |
| GOLGA6L6  | 727832   | 4091 | 0.049959953 | -           | -           | -           |   |
| LDHAL6B   | 92483    | 1680 | 0.121658433 | -           | -           | -           |   |
| CYR61     | 3491     | 2295 | 0.089057154 | 0.097094852 | 0.092063077 | -           |   |
| FONG      | 348751   | 966  | 0.211579884 | 0.230675657 | 0.43744257  | 0.838214753 |   |
| RGS13     | 6003     | 1578 | 0.129522286 | 0.141212094 | 0.401682056 | 3.848457471 |   |
| GATA1     | 2623     | 1501 | 0.136166668 | 0.59382461  | 4.926693303 | 5.529369341 |   |
| SCRT2     | 85508    | 3594 | 0.056868717 | 0.062001303 | 0.058788192 | -           |   |
| B3GNT4    | 79369    | 1554 | 0.131522631 | 0.286785952 | 0.27192376  | -           |   |
| KCTD17    | 79734    | 1704 | 0.119944934 | -           | -           | 0.118796281 |   |
| LOC40075  | 400752   | 1740 | 0.117463315 | 0.128064761 | -           | 0.116338427 |   |
| LILRB4    | 11006    | 2097 | 0.097465984 | -           | -           | -           |   |
| ROBO3     | 64221    | 4554 | 0.044880581 | -           | -           | -           |   |
| HCG4      | 54435    | 2083 | 0.09812106  | 0.106976805 | -           | -           |   |
| SLC6A12   | 6539     | 3500 | 0.058396048 | 0.063666481 | -           | 1.677267722 |   |
| IGSF5     | 150084   | 2066 | 0.098928445 | 0.431428238 | -           | -           |   |
| RPGRIP1   | 57096    | 3950 | 0.051743334 | 0.112826676 | 0.320938878 | 0.30748688  |   |
| C2orf66   | 401027   | 1386 | 0.147464768 | 0.321547886 | 0.152442108 | 0.730262853 |   |
| FARP1     | 10160    | 5028 | 0.040649596 | 0.132955062 | 0.042021631 | 0.08052063  |   |
| LY6G5C    | 80741    | 738  | 0.276946027 | 0.603882614 | -           | -           |   |
| SLC4A11   | 83959    | 3268 | 0.062541667 | 0.272745024 | 0.193957859 | 0.247770946 |   |
| LOC38858  | 388588   | 555  | 0.368263366 | 1.204500999 | 1.142079791 | 0.72947338  |   |
| DNASE2B   | 58511    | 1279 | 0.159801539 | 0.174224148 | -           | -           |   |
| TMPRSS4   | 56649    | 3549 | 0.057589791 | 1.44411151  | 0.535802438 | 4.220832871 |   |
| HIST1H3F  | 8968     | 466  | 0.438596927 | -           | -           | -           |   |
| DFNA5     | 1687     | 2521 | 0.08107345  | -           | 0.083809901 | -           |   |
| PSD2      | 84249    | 4527 | 0.045148259 | 0.246115181 | 0.046672136 | 0.223579482 |   |

|           |          |      |             |             |             |             |
|-----------|----------|------|-------------|-------------|-------------|-------------|
| TPTE2     | 93492    | 1974 | 0.103539092 | 0.225767664 | 0.214067641 | 0.10254755  |
| TRIM46    | 80128    | 3142 | 0.065049703 | 1.631174968 | 0.268981237 | 2.834777202 |
| SP7       | 121340   | 3010 | 0.067902381 | -           | -           | -           |
| MORC4     | 79710    | 3847 | 0.053128715 | 0.11584751  | -           | 0.105239856 |
| TMEM74    | 157753   | 2087 | 0.097932999 | 0.213543541 | -           | -           |
| TIPARP-AS | 1E+08    | 2556 | 0.07996329  | -           | -           | -           |
| FSCN3     | 29999    | 1911 | 0.106952469 | -           | 0.110562408 | -           |
| TNFRSF100 | 8794     | 1512 | 0.135176037 | 2.652770056 | 0.978170191 | 2.008222847 |
| ATP10B    | 23120    | 7582 | 0.026956762 | -           | -           | -           |
| SMPDL3A   | 10924    | 2210 | 0.092482429 | 0.302487807 | -           | 0.457983853 |
| TMPRSS7   | 344805   | 2622 | 0.077950484 | -           | 0.080581526 | -           |
| PCDHA2    | 56146    | 5360 | 0.038131748 | -           | -           | -           |
| SAG       | 6295     | 1767 | 0.11566846  | -           | -           | -           |
| EPO       | 2056     | 1340 | 0.152526991 | -           | -           | -           |
| SLC10A4   | 201780   | 2118 | 0.096499607 | -           | -           | -           |
| LOC100133 | 1E+08    | 4370 | 0.04677029  | -           | -           | 0.046322394 |
| MOBP      | 4336     | 3077 | 0.066423844 | 0.144837624 | -           | 0.131575472 |
| SLFN12L   | 1.01E+08 | 1767 | 0.11566846  | -           | -           | 1.1456076   |
| CCDC64B   | 146439   | 1811 | 0.112858182 | -           | -           | -           |
| RNLS      | 55328    | 2420 | 0.084457094 | 0.092079622 | -           | 0.167296581 |
| CHRM4     | 1132     | 1468 | 0.139227635 | 0.303586764 | 0.143926949 | 0.689471604 |
| KCNK3     | 3777     | 3978 | 0.051379127 | 0.168048782 | 0.106226627 | -           |
| EDAR      | 10913    | 4226 | 0.048363977 | 0.052728984 | -           | -           |
| ZNF385D   | 79750    | 1812 | 0.112795898 | 0.491904381 | 0.116603069 | 0.782009956 |
| FAM65C    | 140876   | 4292 | 0.047620263 | 0.103836293 | 0.098455154 | 0.188656909 |
| SLC47A2   | 146802   | 2355 | 0.086788182 | 0.283863293 | 0.089717521 | 0.257871163 |
| ANKRD20A  | 728747   | 3517 | 0.058113781 | 0.063358739 | -           | -           |
| FBXO25    | 26260    | 2529 | 0.08081699  | 0.440554932 | 0.250634355 | 0.560301321 |
| MUC6      | 4588     | 8003 | 0.025538694 | 0.055687288 | -           | 0.025294123 |
| ASGR1     | 432      | 1519 | 0.134553106 | -           | 0.139094642 | -           |
| LCN6      | 158062   | 738  | 0.276946027 | -           | 0.286293715 | -           |
| ANKRD7    | 56311    | 1358 | 0.150505278 | -           | -           | -           |
| LOC391322 | 391322   | 563  | 0.363030494 | 0.395795177 | 0.375283768 | -           |
| PFN4      | 375189   | 792  | 0.258063343 | -           | -           | 0.255591999 |
| RCVRN     | 5957     | 1217 | 0.16794262  | -           | 0.694444573 | 0.166334316 |
| TP63      | 8626     | 4927 | 0.041482884 | -           | -           | 0.041085623 |
| ARHGAP22  | 58504    | 2775 | 0.073652673 | -           | 0.076138653 | 0.072947338 |
| MEGF11    | 84465    | 5914 | 0.034559717 | 0.075357688 | 0.035726202 | 0.034228756 |
| CYP2D6    | 1565     | 1673 | 0.122167464 | 0.266386951 | 0.126290951 | -           |
| CPO       | 130749   | 1209 | 0.169053902 | -           | -           | 0.334869914 |
| BK250D10  | 339674   | 1506 | 0.135714587 | -           | 0.420885979 | -           |
| PRR23C    | 389152   | 2791 | 0.073230444 | 0.159679459 | 0.302808687 | 0.290116608 |
| HIST1H2BN | 8341     | 449  | 0.455203047 | -           | 0.470567397 | 0.901687586 |
| SALL4     | 57167    | 3487 | 0.058613756 | -           | -           | -           |
| LMO3      | 55885    | 3727 | 0.054839326 | -           | 0.056690304 | -           |
| C14orf19  | 280655   | 575  | 0.355454205 | -           | -           | -           |
| MYOZ1     | 58529    | 1661 | 0.123050071 | -           | -           | 0.121871681 |
| SLC4A9    | 83697    | 3293 | 0.062066859 | 0.135337191 | 0.064161786 | 0.184417428 |
| NGFR      | 4804     | 3420 | 0.059762037 | 0.521246046 | 0.06177917  | 0.710276712 |
| COL6A6    | 131873   | 8475 | 0.024116362 | -           | -           | -           |
| SLC5A2    | 6524     | 2279 | 0.089682391 | 0.195553036 | 0.092709417 | 0.088823547 |
| ABCA17P   | 650655   | 4188 | 0.04880281  | -           | 0.050450039 | 0.096670899 |
| ANP32D    | 23519    | 396  | 0.516126687 | -           | -           | -           |
| LOC100505 | 1.01E+08 | 2206 | 0.092650122 | -           | -           | 0.091762857 |
| C14orf182 | 283551   | 2686 | 0.076093138 | 0.165921582 | 0.314645959 | -           |
| BMP10     | 27302    | 1584 | 0.129031672 | -           | 0.266773689 | -           |
| STH       | 246744   | 445  | 0.45929476  | -           | -           | -           |
| ASPN      | 54829    | 2541 | 0.080435328 | -           | 0.083150241 | 0.159330077 |
| METTL21C  | 121952   | 2312 | 0.088402322 | 0.096380919 | 0.36554457  | 0.175111473 |
| NRADDP    | 1E+08    | 1012 | 0.201962617 | -           | -           | 0.600085562 |
| ZNF98     | 148198   | 2260 | 0.090436358 | -           | -           | 0.179140587 |
| HSPA2     | 3306     | 2802 | 0.072942958 | 0.079526297 | -           | 0.144488839 |

|          |        |       |             |             |             |             |   |
|----------|--------|-------|-------------|-------------|-------------|-------------|---|
| RGPD3    | 653489 | 5873  | 0.034800982 | -           | -           | -           | - |
| SCGB3A1  | 92304  | 517   | 0.395331079 | 0.862021991 | 0.408674587 | 0.783090379 |   |
| RPP25    | 54913  | 2333  | 0.087606587 | 0.191026734 | 0.271690649 | 2.429493426 |   |
| GYPE     | 2996   | 1783  | 0.114630492 | 0.249952535 | -           | -           |   |
| GJA3     | 2700   | 5219  | 0.039161941 | 0.042696433 | -           | 0.038786906 |   |
| TBC1D12  | 23232  | 5749  | 0.035551603 | 0.31008201  | -           | 0.176055717 |   |
| ERG      | 2078   | 5114  | 0.039966009 | -           | 0.041314971 | -           |   |
| RFPL3    | 10738  | 1488  | 0.137356296 | -           | -           | -           |   |
| IAH1     | 285148 | 951   | 0.214917106 | 0.234314074 | -           | 0.638576855 |   |
| MEF2BNB  | 4207   | 1978  | 0.103329711 | -           | -           | 0.204680347 |   |
| HLF      | 3131   | 5607  | 0.036451965 | -           | -           | 0.036102883 |   |
| APLN     | 8862   | 3238  | 0.063121114 | 0.068818    | 0.522012999 | 0.500133077 |   |
| SCGB1A1  | 7356   | 452   | 0.452181788 | -           | -           | -           |   |
| DBNDD2   | 55861  | 1538  | 0.132890876 | -           | -           | -           |   |
| FKSG43   | 83957  | 1800  | 0.113547871 | -           | -           | -           |   |
| LOC65350 | 653501 | 4028  | 0.050741353 | -           | -           | -           |   |
| PCDHB14  | 56122  | 2793  | 0.073178005 | 0.159565116 | -           | -           |   |
| DNAI1    | 27019  | 2548  | 0.080214352 | -           | -           | -           |   |
| RRH      | 10692  | 1558  | 0.13118496  | 0.14302483  | 0.135612812 | -           |   |
| LOC10030 | 1E+08  | 1667  | 0.122607179 | -           | -           | 0.971464249 |   |
| LAMA5    | 3911   | 11426 | 0.017887814 | 0.019502248 | 0.018491577 | 0.053149535 |   |
| C1orf116 | 79098  | 5502  | 0.037147613 | -           | 0.038401447 | 0.036791869 |   |
| LOC10030 | 1E+08  | 2328  | 0.087794746 | -           | 0.272274177 | -           |   |
| GOLGA8F  | 1E+08  | 4511  | 0.045308395 | -           | 0.046837677 | -           |   |
| FLJ32063 | 150538 | 3397  | 0.060166667 | 0.131193809 | 0.124394914 | -           |   |
| OXCT2    | 64064  | 1824  | 0.11205382  | -           | 0.115835944 | -           |   |
| SERPINF2 | 5345   | 2296  | 0.089018366 | 0.291157689 | 0.276068939 | 1.939649384 |   |
| LAMB2    | 3913   | 5817  | 0.03513601  | -           | -           | 0.034799529 |   |
| VCAN     | 1462   | 12416 | 0.016461515 | 0.01794722  | 0.017017136 | -           |   |
| IL34     | 146433 | 1779  | 0.114888234 | 0.250514542 | -           | 0.455152025 |   |
| NT5E     | 4907   | 4086  | 0.050021089 | 0.054535655 | -           | 0.099084123 |   |
| LOC28464 | 284648 | 1504  | 0.135895059 | -           | 0.280963778 | 0.134593659 |   |
| ZNF563   | 147837 | 2786  | 0.073361869 | 0.079983017 | 0.075838034 | 0.072659319 |   |
| PMCHL2   | 5370   | 1842  | 0.110958832 | -           | -           | -           |   |
| HPX      | 3263   | 1635  | 0.125006831 | -           | -           | -           |   |
| OLFM2    | 93145  | 1899  | 0.107628314 | -           | -           | 0.426390443 |   |
| KIAA2022 | 340533 | 11727 | 0.017428683 | -           | -           | -           |   |
| MYT1     | 4661   | 5550  | 0.036826337 | -           | -           | -           |   |
| UNC13C   | 440279 | 8140  | 0.025108866 | -           | -           | -           |   |
| PACS1    | 55690  | 4488  | 0.04554059  | -           | -           | 0.180417881 |   |
| PAPSS2   | 9060   | 3874  | 0.052758433 | 0.115040106 | 0.054539174 | 0.156759574 |   |
| FAM109B  | 150368 | 2369  | 0.086275293 | -           | 0.17837464  | -           |   |
| CR2      | 1380   | 4184  | 0.048849467 | 0.05325829  | 0.05049827  | 0.048381659 |   |
| C6orf218 | 221718 | 3018  | 0.067722388 | 0.073834554 | -           | 0.201221534 |   |
| LOC40216 | 402160 | 2115  | 0.096636486 | 0.105358243 | -           | -           |   |
| C4orf49  | 84709  | 1339  | 0.152640902 | -           | -           | -           |   |
| MKX      | 283078 | 3658  | 0.055873747 | -           | -           | -           |   |
| C5orf58  | 133874 | 524   | 0.390049939 | 0.425253215 | -           | -           |   |
| GAL3ST2  | 64090  | 1449  | 0.141053256 | -           | 0.14581419  | -           |   |
| OTOP1    | 133060 | 1869  | 0.109355895 | -           | -           | -           |   |
| PCDHGA1  | 56114  | 4602  | 0.044412466 | -           | -           | 0.04398715  |   |
| GCM1     | 8521   | 2780  | 0.073520204 | 0.40077821  | 0.076001713 | 0.218448413 |   |
| LAMA4    | 3910   | 7287  | 0.028048054 | -           | -           | 0.027779451 |   |
| NUDT16P1 | 152195 | 2363  | 0.086494358 | -           | -           | 0.085666044 |   |
| SLC47A1  | 55244  | 3279  | 0.06233186  | 0.271830052 | 0.193307192 | 0.246939754 |   |
| LOC64136 | 641365 | 2017  | 0.101331764 | -           | -           | -           |   |
| LOC28475 | 284751 | 2278  | 0.089721759 | 0.391277761 | 0.092750115 | 1.332938079 |   |
| PAR-SN   | 347746 | 1797  | 0.113737434 | 0.372007821 | 0.235152767 | 0.225296453 |   |
| P2RX6    | 9127   | 2754  | 0.074214295 | -           | -           | 0.147007163 |   |
| PDE2A    | 5138   | 4327  | 0.047235075 | -           | 0.097658776 | 0.093565455 |   |
| NR2E1    | 7101   | 3271  | 0.062484307 | -           | -           | 0.061885926 |   |
| KCNK6    | 9424   | 2671  | 0.076520467 | -           | -           | 0.075787669 |   |

|           |          |      |             |             |             |             |
|-----------|----------|------|-------------|-------------|-------------|-------------|
| RASD1     | 51655    | 1814 | 0.112671537 | 0.12284051  | 0.46589804  | 0.669555225 |
| LOC100130 | 1E+08    | 3236 | 0.063160126 | -           | 0.065291953 | 0.062555273 |
| DNASE1L2  | 1775     | 1365 | 0.149733456 | 0.81623694  | 0.154787371 | 0.593198133 |
| SPDYC     | 387778   | 882  | 0.231730349 | -           | -           | 0.229511182 |
| SLX1A-SUL | 1.01E+08 | 2218 | 0.092148858 | 0.100465593 | 0.476295675 | 0.182532789 |
| LOXL1     | 4016     | 2361 | 0.086567627 | 0.283141912 | 0.089489522 | -           |
| CYP1A1    | 1543     | 2608 | 0.078368929 | 0.854419803 | 0.567098669 | 2.018079155 |
| ACADL     | 33       | 2565 | 0.079682717 | -           | -           | -           |
| TMC4      | 147798   | 2494 | 0.081951115 | 0.536085047 | 0.254151678 | 0.649330755 |
| NOTCH4    | 4855     | 6762 | 0.030225698 | 0.098860996 | 0.124983591 | 0.179617447 |
| DCST2     | 127579   | 2421 | 0.084422209 | 0.092041588 | 0.17454338  | 0.083613739 |
| GOLGA7B   | 401647   | 2894 | 0.070624108 | 0.153996327 | 0.219023595 | 0.349738879 |
| TTBK1     | 84630    | 7128 | 0.028673705 | -           | 0.029641521 | 0.141995555 |
| MAP7D2    | 256714   | 4158 | 0.049154923 | 0.107182629 | 0.050814036 | 0.146052571 |
| FAM18B2   | 1.01E+08 | 2781 | 0.073493768 | -           | -           | -           |
| SPRED3    | 399473   | 1323 | 0.1544869   | -           | -           | -           |
| PNPLA5    | 150379   | 2550 | 0.080151438 | 0.174770733 | -           | -           |
| MT1IP     | 644314   | 2005 | 0.101938238 | -           | 0.210757867 | 0.403848106 |
| GRID1     | 2894     | 5849 | 0.03494378  | -           | 0.036123228 | -           |
| SCN1B     | 6324     | 1463 | 0.139703464 | 0.152312156 | 0.144418839 | 0.138365593 |
| SSR4P1    | 728039   | 2274 | 0.089879581 | 0.097991506 | 0.278739791 | 0.178037698 |
| CHRNA2    | 1135     | 4083 | 0.050057842 | 0.054575725 | -           | -           |
| IRF6      | 3664     | 4505 | 0.045368739 | 0.247317075 | 0.281400348 | 0.179737059 |
| LRRN3     | 54674    | 3744 | 0.054590323 | -           | 0.056432896 | 0.054067538 |
| HIST2H2BA | 337875   | 515  | 0.396866346 | 0.432684825 | 1.230785018 | 0.393065753 |
| EGFL8     | 80864    | 1335 | 0.153098253 | -           | 0.158265739 | -           |
| GPC5      | 2262     | 2904 | 0.070380912 | -           | -           | -           |
| TPI1P3    | 728402   | 1214 | 0.168357634 | 0.734209834 | 0.348080332 | 0.50023607  |
| CXCL3     | 2921     | 1166 | 0.175288309 | 0.573325947 | 2.536866774 | 3.29858353  |
| FOXI1     | 2299     | 2296 | 0.089018366 | -           | -           | -           |
| INHBC     | 3626     | 1990 | 0.102706617 | -           | -           | 0.203446093 |
| LRRC25    | 126364   | 2430 | 0.084109534 | 16.59782549 | 1.478123845 | 67.22637548 |
| LRRIQ4    | 344657   | 1825 | 0.111992421 | -           | -           | 0.110919925 |
| AKAP14    | 158798   | 855  | 0.23904815  | 0.521246046 | 0.49423336  | 0.236758904 |
| PSPN      | 5623     | 471  | 0.433940909 | 0.473105488 | 0.448587604 | -           |
| BMP2      | 650      | 3150 | 0.064884498 | 0.495183744 | -           | 0.321315655 |
| C3orf49   | 132200   | 1289 | 0.158561806 | -           | 0.327827403 | -           |
| MYCL1     | 4610     | 3624 | 0.056397949 | -           | 0.408110742 | 0.111715708 |
| LOC100130 | 1E+08    | 1789 | 0.114246041 | -           | -           | -           |
| WNT6      | 7475     | 1700 | 0.120227158 | -           | -           | -           |
| GALNT9    | 50614    | 2680 | 0.076263496 | -           | -           | -           |
| WBSCR27   | 155368   | 958  | 0.213346731 | -           | -           | -           |
| RHBDL3    | 162494   | 4688 | 0.043597732 | 0.998183955 | -           | 0.172720873 |
| PRR5      | 55615    | 2574 | 0.079404106 | -           | 0.164168424 | 0.078643692 |
| C6orf58   | 352999   | 1200 | 0.170321807 | 0.185693904 | -           | 0.168690719 |
| GJC3      | 349149   | 1131 | 0.180712792 | 0.19702271  | -           | -           |
| TOX       | 9760     | 4131 | 0.049476197 | -           | -           | -           |
| RFPL2     | 10739    | 2410 | 0.084807539 | -           | 0.087670025 | -           |
| SLC26A11  | 284129   | 2930 | 0.069756371 | -           | 0.721108401 | 0.82906019  |
| LOC158571 | 158572   | 2304 | 0.088709274 | -           | -           | 0.08785975  |
| C1QA      | 712      | 1098 | 0.186144051 | -           | 0.192426923 | 0.184361442 |
| DRD4      | 1815     | 1378 | 0.148320877 | 0.323414637 | -           | 0.146900481 |
| CLEC4F    | 165530   | 2486 | 0.08221487  | -           | -           | -           |
| LOC113230 | 113230   | 1329 | 0.153789442 | 0.167669439 | 0.158980257 | 0.152316676 |
| KY        | 339855   | 5718 | 0.035744346 | 0.272792724 | 0.184754076 | 0.283216318 |
| BAIAP3    | 8938     | 4691 | 0.04356985  | -           | 0.090080904 | -           |
| MLNR      | 2862     | 1239 | 0.164960588 | -           | -           | 0.163380842 |
| LY6G6C    | 80740    | 880  | 0.232257009 | -           | 0.24009632  | 0.230032799 |
| C1orf172  | 126695   | 1803 | 0.11335894  | -           | 0.234370229 | -           |
| PNMA5     | 114824   | 3218 | 0.063513415 | -           | 0.131314333 | 0.125810356 |
| CCDC157   | 550631   | 3023 | 0.067610376 | 0.51598703  | 0.489246884 | 0.602666148 |
| C17orf110 | 1E+08    | 842  | 0.242738917 | -           | -           | 0.480828653 |



|          |          |       |             |             |             |             |
|----------|----------|-------|-------------|-------------|-------------|-------------|
| AKR1B15  | 441282   | 1625  | 0.125776103 | 0.137127806 | 0.390064175 | 0.373714824 |
| ST18     | 9705     | 6330  | 0.032288494 | -           | -           | -           |
| ARPM1    | 84517    | 2017  | 0.101331764 | -           | -           | -           |
| ZSCAN5B  | 342933   | 1626  | 0.12569875  | -           | -           | -           |
| WDR49    | 151790   | 2672  | 0.076491829 | 0.083395466 | -           | -           |
| YSK4     | 80122    | 4165  | 0.049072309 | 0.053501245 | -           | -           |
| IGFN1    | 91156    | 11810 | 0.017306195 | 0.264153902 | -           | 1.045568217 |
| SERPINI2 | 5276     | 1445  | 0.141443715 | -           | 0.146217828 | -           |
| LOC84989 | 84989    | 1335  | 0.153098253 | 0.166915869 | 0.158265739 | 0.151632107 |
| KCNA6    | 3742     | 5982  | 0.034166862 | 0.037250532 | -           | 0.067679326 |
| ENDOD1   | 23052    | 4693  | 0.043551282 | 0.047481927 | 0.090042515 | 0.431342133 |
| LOC10050 | 1.01E+08 | 10558 | 0.019358417 | -           | 0.040023634 | 0.038346062 |
| LOC44046 | 440461   | 1660  | 0.123124198 | 0.134236557 | 0.38183993  | 0.121945098 |
| LOC28317 | 283177   | 2737  | 0.074675253 | 0.081414938 | -           | 0.073960125 |
| ZBTB7C   | 201501   | 4188  | 0.04880281  | 1.010941024 | -           | 0.435019046 |
| RPS26P11 | 441502   | 566   | 0.361106304 | 0.393697323 | -           | -           |
| GABRR2   | 2570     | 1631  | 0.125313408 | 0.546493402 | 0.518172315 | 1.365246777 |
| FGF1     | 2246     | 4072  | 0.050193067 | -           | -           | -           |
| RAG1     | 5896     | 6582  | 0.031052289 | 0.101564578 | 0.064200778 | 0.030754917 |
| ZNF648   | 127665   | 3649  | 0.056011556 | -           | -           | -           |
| EPS8L3   | 79574    | 2332  | 0.087644154 | 0.191108649 | -           | 0.08680483  |
| NGEF     | 25791    | 3184  | 0.064191636 | 0.139970279 | 0.066358279 | 0.317884521 |
| KIAA1199 | 57214    | 7080  | 0.028868103 | 0.157367715 | 0.059684961 | 0.085774942 |
| UNC79    | 57578    | 8471  | 0.02412775  | -           | -           | 0.04779338  |
| IRF4     | 3662     | 5332  | 0.03833199  | -           | 0.039625799 | -           |
| ZNF233   | 353355   | 2806  | 0.072838976 | 0.635303449 | 0.150594983 | 0.072141434 |
| B3GNT6   | 192134   | 2510  | 0.081428752 | 0.177555924 | 0.336708783 | 0.322595798 |
| NHLRC4   | 283948   | 2065  | 0.098976353 | 0.323727871 | 0.511585379 | 0.294085515 |
| KRT8P41  | 283102   | 1828  | 0.111808626 | -           | 0.115582473 | -           |
| FPR1     | 2357     | 1371  | 0.149078168 | 0.812664788 | 0.154109965 | 7.825477561 |
| PKP1     | 5317     | 5447  | 0.037522704 | -           | -           | -           |
| GNAL     | 2774     | 4027  | 0.050753953 | 0.055334662 | 0.209868151 | 0.100535815 |
| TICAM2   | 353376   | 3074  | 0.066488669 | -           | 0.137465687 | 0.06585194  |
| BEND7    | 222389   | 2408  | 0.084877977 | -           | -           | -           |
| ZSCAN4   | 201516   | 2260  | 0.090436358 | -           | -           | -           |
| NRXN1    | 9378     | 9578  | 0.021339128 | 0.023265054 | -           | -           |
| LOC10013 | 1E+08    | 1567  | 0.130431505 | -           | -           | -           |
| KLRF1    | 51348    | 1242  | 0.164562132 | 0.1794144   | -           | 0.325972404 |
| ADAM5P   | 255926   | 1718  | 0.118967502 | -           | -           | -           |
| SHISA4   | 149345   | 1653  | 0.123645595 | 0.134805012 | 0.51127589  | 0.367384506 |
| SLC2A10  | 81031    | 4241  | 0.048192919 | 0.052542486 | 0.049819562 | -           |
| FAM164C  | 79696    | 2093  | 0.097652254 | -           | 0.100948285 | -           |
| PPP1R2P3 | 153743   | 1991  | 0.102655032 | -           | -           | 0.203343911 |
| C7orf10  | 79783    | 1745  | 0.117126744 | -           | -           | -           |
| CUX2     | 23316    | 6855  | 0.029815634 | 0.357572507 | 0.030821993 | 0.177180624 |
| FAM150B  | 285016   | 1403  | 0.145677953 | 0.158825862 | -           | 0.288565735 |
| BCL7A    | 605      | 3714  | 0.055031278 | -           | 0.056888735 | -           |
| SAMD15   | 161394   | 2025  | 0.100931441 | 0.110040832 | 0.313014461 | 0.099964871 |
| ST8SIA5  | 29906    | 2627  | 0.07780212  | 0.084824014 | 0.321712617 | -           |
| KIAA1984 | 84960    | 1727  | 0.118347521 | 0.129028769 | 0.734052442 | 0.351642495 |
| USH1G    | 124590   | 3561  | 0.057395723 | -           | -           | -           |
| DCST1    | 149095   | 2331  | 0.087681754 | -           | 0.181282507 | -           |
| NOXA1    | 10811    | 1650  | 0.123870405 | 1.35050112  | 0.128051371 | 1.840262391 |
| PAK6     | 56924    | 3961  | 0.051599638 | 0.168770021 | -           | 0.102210989 |
| RASD2    | 23551    | 3047  | 0.067077837 | 0.219395489 | -           | -           |
| C12orf33 | 253128   | 2236  | 0.091407052 | 0.099656836 | -           | -           |
| TGM7     | 116179   | 2312  | 0.088402322 | -           | -           | -           |
| EMX2     | 2018     | 2908  | 0.070284102 | 0.153254941 | -           | -           |
| TMEM45A  | 55076    | 1564  | 0.130681693 | 0.284952282 | 0.135092558 | 0.647151096 |
| TMEM217  | 221468   | 1590  | 0.12854476  | -           | 0.132883498 | -           |
| TM4SF18  | 116441   | 3852  | 0.053059753 | -           | -           | -           |
| SCARNA6  | 677772   | 266   | 0.768369053 | -           | -           | 0.761010763 |

|           |        |       |             |             |             |             |
|-----------|--------|-------|-------------|-------------|-------------|-------------|
| RAD21-AS1 | 644660 | 2010  | 0.101684661 | 0.332586097 | 0.31535039  | 0.201421754 |
| GGTLC1    | 92086  | 994   | 0.205619887 | -           | 0.212560122 | -           |
| C9orf172  | 389813 | 2931  | 0.069732572 | 0.152052327 | 0.360431186 | 0.414388665 |
| HSP90AB4  | 664618 | 1518  | 0.134641744 | -           | 0.139186272 | -           |
| SHROOM3   | 57619  | 11023 | 0.018541792 | 0.020215249 | -           | 0.018364226 |
| CCDC87    | 55231  | 2915  | 0.070115324 | -           | 0.217445724 | 0.069443864 |
| GSPT2     | 23708  | 2861  | 0.071438717 | -           | -           | -           |
| TSPAN5    | 10098  | 3406  | 0.060007683 | -           | -           | -           |
| ANKRD20A  | 729171 | 3670  | 0.055691054 | 0.182152058 | 0.05757078  | 0.055157728 |
| C9orf116  | 138162 | 731   | 0.279598041 | 0.304832674 | 1.445176206 | -           |
| TTC39A    | 22996  | 2759  | 0.0740798   | -           | -           | 0.440222246 |
| EPPK1     | 83481  | 15534 | 0.013157343 | -           | -           | -           |
| C8orf85   | 441376 | 1819  | 0.11236183  | -           | 0.116154349 | 0.445143184 |
| AIRE      | 326    | 2257  | 0.090556565 | 0.19745918  | 0.187226195 | 0.08968935  |
| ABCG2     | 9429   | 4445  | 0.04598114  | -           | 0.190132519 | 0.910816031 |
| SLC24A2   | 25769  | 10919 | 0.018718396 | 0.020407792 | 0.038700387 | 0.037078279 |
| FLJ37035  | 399821 | 2527  | 0.080880953 | 0.088180722 | -           | 0.160212792 |
| PC        | 5091   | 4192  | 0.048756242 | -           | 0.050401899 | -           |
| GPR182    | 11318  | 1620  | 0.126164301 | -           | 0.391268077 | -           |
| TEAD1     | 7003   | 9433  | 0.021667144 | -           | -           | -           |
| PVRL4     | 81607  | 3520  | 0.058064252 | 0.06330474  | 0.12004816  | 0.402557398 |
| LOC28388  | 283888 | 2632  | 0.077654319 | 0.253988622 | 0.160550731 | 0.153821324 |
| ZNF702P   | 79986  | 3015  | 0.067789774 | 0.221724064 | 0.070077864 | 0.335702924 |
| PKD2L2    | 27039  | 2236  | 0.091407052 | -           | 0.09449229  | -           |
| MESP2     | 145873 | 1614  | 0.126633314 | 0.276124764 | 0.130907535 | -           |
| SLC6A16   | 28968  | 2945  | 0.069401076 | 0.151329497 | 0.143487104 | 0.756101016 |
| MTRNR2L3  | 1E+08  | 1383  | 0.147784648 | 0.161122693 | 0.152772785 | 0.292738775 |
| SPAG8     | 26206  | 2010  | 0.101684661 | -           | 0.525583983 | -           |
| LOC440419 | 440419 | 3083  | 0.066294573 | 0.072277874 | 0.068532196 | -           |
| ABRA      | 137735 | 2831  | 0.07219575  | -           | 0.074632554 | -           |
| FLJ35024  | 401491 | 928   | 0.220243716 | 0.480242855 | -           | -           |
| LOC100130 | 1E+08  | 934   | 0.218828874 | 0.477157783 | 0.226214948 | 1.300399548 |
| LOC100134 | 1E+08  | 1210  | 0.168914188 | 0.736636974 | 0.349231011 | -           |
| KHDC1L    | 1E+08  | 652   | 0.313475718 | -           | 0.648112765 | -           |
| ZAP70     | 7535   | 2450  | 0.083422926 | -           | -           | -           |
| ZNF705A   | 440077 | 3438  | 0.059449147 | 0.194443878 | 0.061455719 | 0.235519329 |
| TMEFF1    | 8577   | 2501  | 0.081721779 | -           | -           | -           |
| SLC35G3   | 146861 | 1874  | 0.109064124 | 0.118907516 | 0.112745337 | -           |
| KLHL29    | 114818 | 5084  | 0.040201843 | 0.04383019  | 0.041558765 | -           |
| RAB41     | 347517 | 1077  | 0.189773601 | -           | -           | 0.187956233 |
| RNF5P1    | 286140 | 1085  | 0.188374348 | -           | -           | -           |
| UOX       | 391051 | 1553  | 0.13160732  | 0.143485309 | -           | -           |
| TPSD1     | 23430  | 855   | 0.23904815  | -           | -           | -           |
| IER3      | 8870   | 1254  | 0.162987375 | 0.533092547 | 0.673954582 | 2.421397882 |
| SYNM      | 23336  | 7355  | 0.027788738 | 0.181780572 | 0.086180052 | 0.082567857 |
| RYR1      | 6261   | 15391 | 0.01327959  | -           | 0.041183437 | -           |
| PPP1R42   | 286187 | 1111  | 0.183965948 | -           | -           | -           |
| BDNF      | 627    | 4755  | 0.042983421 | 0.09372563  | -           | 0.04257179  |
| CHRN2     | 1141   | 5731  | 0.035663264 | 0.11664597  | 0.110600992 | 0.28257388  |
| SYT7      | 9066   | 4609  | 0.044345014 | -           | -           | -           |
| C3orf80   | 401097 | 2606  | 0.078429074 | -           | -           | -           |
| LOC285375 | 285375 | 1050  | 0.194653493 | 0.212221605 | 0.201223582 | 0.771157573 |
| PLEKHA7   | 144100 | 4820  | 0.042403769 | 0.138692542 | 0.087670025 | 0.587967652 |
| TSNAX-DIS | 1E+08  | 7682  | 0.026605854 | -           | 0.055007748 | -           |
| CCDC37    | 348807 | 2086  | 0.097979946 | -           | -           | -           |
| PPEF1     | 5475   | 2873  | 0.07114033  | 0.155121952 | -           | 0.211377163 |
| BACH2     | 60468  | 9215  | 0.022179725 | 0.265996694 | 0.068785055 | 0.109836605 |
| HIST2H2AC | 8338   | 437   | 0.467702902 | 2.549573052 | 0.483489156 | 0.463223943 |
| GPR111    | 222611 | 5135  | 0.039802564 | 0.086789751 | -           | 0.039421395 |
| HIST1H2BC | 8347   | 438   | 0.466635087 | -           | 0.4823853   | 1.848665415 |
| RPL23AP32 | 56969  | 620   | 0.32965511  | -           | 0.681563746 | -           |
| FHL2      | 2274   | 1907  | 0.107176805 | 0.116849861 | 0.110794316 | 0.106150426 |

|           |        |       |             |             |             |             |
|-----------|--------|-------|-------------|-------------|-------------|-------------|
| AMACR     | 23600  | 3352  | 0.060974394 | 0.465342719 | 0.18909734  | 0.422733306 |
| SGK3      | 23678  | 4483  | 0.045591383 | -           | -           | -           |
| PPP2R2B   | 5521   | 2008  | 0.10178594  | -           | -           | -           |
| SYCE1L    | 1E+08  | 877   | 0.233051503 | 0.254085159 | -           | -           |
| FILIP1    | 27145  | 4629  | 0.044153417 | -           | -           | -           |
| PDPN      | 10630  | 2828  | 0.072272337 | 0.07879515  | 0.149423452 | -           |
| OR52B6    | 340980 | 1008  | 0.202764056 | -           | 0.209607898 | 0.401644569 |
| GPR62     | 118442 | 2206  | 0.092650122 | -           | -           | -           |
| PROP1     | 5626   | 1464  | 0.139608038 | -           | -           | -           |
| OSBPL10   | 114884 | 4231  | 0.048306823 | 0.052666671 | 0.049937311 | 0.047844212 |
| CALB1     | 793    | 2531  | 0.080753128 | 0.176082722 | 0.166957536 | 0.399898979 |
| FAM151A   | 338094 | 1998  | 0.102295379 | -           | 0.211496258 | 0.101315747 |
| GXYLT2    | 727936 | 1547  | 0.132117756 | -           | 0.409731276 | -           |
| ALS2CR11  | 151254 | 5714  | 0.035769368 | 0.03899767  | 0.073953364 | -           |
| CSNK2A1P  | 283106 | 1584  | 0.129031672 | -           | 0.400160533 | -           |
| CEP170P1  | 645455 | 1091  | 0.187338376 | -           | -           | 0.742177316 |
| HOXC5     | 3222   | 1641  | 0.124549767 | 0.407372367 | 0.38626099  | -           |
| PKD1L1    | 168507 | 9075  | 0.022521892 | -           | -           | 0.022306211 |
| TDGF1     | 6997   | 2174  | 0.094013877 | 0.20499787  | 0.485935514 | 1.676043944 |
| FAM74A4   | 401508 | 1860  | 0.109885037 | 0.239605037 | 0.227187915 | -           |
| NTN5      | 126147 | 1898  | 0.10768502  | 0.117403943 | -           | 0.106653774 |
| AFAP1L1   | 134265 | 4223  | 0.048398335 | -           | -           | 0.047934848 |
| SLC35D2   | 11046  | 1643  | 0.124398155 | -           | -           | -           |
| SYT12     | 91683  | 3632  | 0.056273725 | -           | 0.058173117 | -           |
| NPTX2     | 4885   | 2738  | 0.07464798  | -           | 0.077167553 | -           |
| KIAA1755  | 85449  | 6412  | 0.031875572 | 0.521286692 | 0.19770876  | 1.325953251 |
| SLC3A1    | 6519   | 2353  | 0.08686195  | 0.094701523 | -           | 0.086030116 |
| HES7      | 84667  | 1699  | 0.120297921 | -           | 0.124358306 | -           |
| TREML2P1  | 221438 | 213   | 0.959559474 | -           | -           | 2.851110746 |
| RTN1      | 6252   | 3327  | 0.061432572 | -           | -           | -           |
| C15orf34  | 80072  | 2835  | 0.072093886 | 0.393002971 | 0.149054505 | 0.285613916 |
| GSTM1     | 2944   | 1266  | 0.161442471 | -           | -           | -           |
| C1QTNF9   | 338872 | 1849  | 0.11053876  | 0.241030486 | 0.114269747 | 0.218960371 |
| LOC28600  | 286002 | 3888  | 0.052568459 | 0.114625867 | 0.054342788 | 0.052065037 |
| KIR3DL2   | 3812   | 1877  | 0.108889807 | 0.237434933 | -           | -           |
| C20orf173 | 140873 | 2121  | 0.096363116 | -           | -           | -           |
| SEZ6L2    | 26470  | 3530  | 0.057899764 | 0.063125406 | 0.2992702   | -           |
| FKSG29    | 1E+08  | 608   | 0.336161461 | -           | -           | 0.332942209 |
| RASSF6    | 166824 | 4323  | 0.04727878  | 0.051545844 | 0.097749138 | 0.140478045 |
| COL4A4    | 1286   | 10341 | 0.019764642 | -           | -           | -           |
| CELA3B    | 23436  | 1055  | 0.193730965 | 0.42243163  | -           | -           |
| DNAH11    | 8701   | 14188 | 0.014405566 | 0.09423429  | 0.074458966 | -           |
| CYP4F3    | 4051   | 2988  | 0.068402332 | 18.27108693 | -           | 24.32127236 |
| SLC8A2    | 6543   | 5111  | 0.039989467 | -           | 0.041339222 | 0.079213016 |
| ABCD2     | 225    | 5341  | 0.038267397 | 0.125163463 | -           | 0.037900929 |
| PXT1      | 222659 | 2121  | 0.096363116 | -           | -           | 0.095440294 |
| AKAP3     | 10566  | 3027  | 0.067521033 | 0.073615026 | -           | 0.401246507 |
| TMEM52    | 339456 | 987   | 0.207078184 | -           | 0.214067641 | -           |
| RACGAP1P  | 83956  | 2794  | 0.073151814 | -           | -           | -           |
| SCGBL     | 284402 | 441   | 0.463460699 | -           | -           | -           |
| ANKK1     | 255239 | 2543  | 0.080372068 | -           | 0.16616969  | -           |
| FBP2      | 8789   | 1332  | 0.153443069 | 0.167291805 | -           | 0.151973621 |
| ERN2      | 10595  | 3634  | 0.056242754 | 0.122637691 | 0.232564404 | 0.11140829  |
| CT45A5    | 441521 | 1338  | 0.152754984 | -           | -           | 0.151292125 |
| GJA4      | 2701   | 1710  | 0.119524075 | -           | -           | -           |
| TMEM151   | 441151 | 4637  | 0.044077241 | -           | -           | 0.087310271 |
| FOXA3     | 3171   | 2046  | 0.099895488 | -           | 0.206534469 | -           |
| KRTAP5-9  | 3846   | 1188  | 0.172042229 | 0.3751392   | 0.355698251 | 1.363157326 |
| CD96      | 10225  | 4481  | 0.045611731 | 0.049728338 | 0.141453757 | 0.04517493  |
| AGXT      | 189    | 1611  | 0.12686913  | -           | -           | -           |
| TRIM54    | 57159  | 2073  | 0.098594389 | -           | -           | -           |
| COL28A1   | 340267 | 3515  | 0.058146847 | 0.063394789 | -           | -           |

|           |        |       |             |             |             |             |   |
|-----------|--------|-------|-------------|-------------|-------------|-------------|---|
| LOC10013  | 1E+08  | 374   | 0.54648708  | -           | -           | -           | - |
| RPL13AP3  | 645683 | 1488  | 0.137356296 | 0.599012593 | 0.283984894 | 0.408122708 |   |
| ATP8A1    | 10396  | 8270  | 0.024714168 | 0.13472351  | 0.051096677 | 0.048954985 |   |
| RAB33A    | 9363   | 1128  | 0.181193411 | 0.395093413 | -           | -           |   |
| FAM183B   | 340286 | 1647  | 0.124096034 | 0.54118442  | -           | 0.614538139 |   |
| LMAN1L    | 79748  | 1795  | 0.11386416  | -           | 0.117707388 | 1.466058618 |   |
| FKBP10    | 60681  | 2888  | 0.070770834 | -           | -           | -           |   |
| ENPP1     | 5167   | 7442  | 0.027463876 | -           | -           | 0.027200868 |   |
| MUC4      | 4585   | 17123 | 0.011936353 | 0.013013647 | -           | -           |   |
| ARID3C    | 138715 | 1239  | 0.164960588 | 0.359697635 | 0.341056919 | 0.490142525 |   |
| LOC84856  | 84856  | 2322  | 0.088021606 | 0.383863367 | 0.363970304 | 0.435893331 |   |
| MCOLN2    | 255231 | 3060  | 0.066792865 | 0.072821139 | -           | -           |   |
| LOC10013  | 1E+08  | 3352  | 0.060974394 | 0.066477531 | -           | -           |   |
| C17orf98  | 388381 | 566   | 0.361106304 | -           | -           | -           |   |
| PYY2      | 23615  | 1071  | 0.190836758 | -           | -           | -           |   |
| CCL7      | 6354   | 810   | 0.252328603 | 4.951837439 | 0.521690769 | 31.23902206 |   |
| ALDH7A1   | 501    | 4953  | 0.041265126 | 0.044989438 | 0.042657937 | 0.0817399   |   |
| TOP1P2    | 7152   | 1521  | 0.134376179 | 0.146504066 | -           | -           |   |
| SLAMF9    | 89886  | 1170  | 0.174689033 | -           | -           | -           |   |
| LOC10049  | 1E+08  | 3218  | 0.063513415 | 0.138491414 | 0.196971499 | -           |   |
| SLIT3     | 6586   | 5395  | 0.037884368 | 0.082607112 | -           | 0.412737255 |   |
| SYNGR4    | 23546  | 1029  | 0.198626014 | -           | -           | 0.393447741 |   |
| CD40LG    | 959    | 1834  | 0.11144284  | 0.121500919 | 0.115204341 | 0.110375607 |   |
| MAGEA12   | 4111   | 1784  | 0.114566238 | -           | -           | -           |   |
| LSAMP     | 4045   | 9478  | 0.021564272 | 0.023510517 | -           | 0.042715523 |   |
| HIST1H3I  | 8354   | 477   | 0.428482533 | -           | 0.885889985 | -           |   |
| C6orf99   | 1E+08  | 654   | 0.312517077 | 0.34072276  | 0.323065384 | -           |   |
| C1orf85   | 112770 | 1603  | 0.127502288 | 0.139009785 | -           | 0.126281262 |   |
| TM6SF2    | 53345  | 1483  | 0.137819399 | -           | -           | -           |   |
| SLC44A3   | 126969 | 2418  | 0.084526951 | 0.184311567 | -           | 0.167434957 |   |
| TP53INP1  | 94241  | 5666  | 0.036072391 | 0.117984125 | 0.037289933 | -           |   |
| PLCXD2    | 257068 | 2148  | 0.095151847 | -           | 0.098363483 | 0.094240625 |   |
| ST6GALNA  | 81849  | 2048  | 0.099797934 | -           | -           | -           |   |
| MSH4      | 4438   | 3219  | 0.063493684 | -           | -           | 0.062885636 |   |
| IFITM5    | 387733 | 733   | 0.278835154 | -           | 0.288246605 | -           |   |
| LOC10049  | 1E+08  | 2275  | 0.089840074 | -           | -           | 0.26693916  |   |
| HSPB9     | 94086  | 616   | 0.331795727 | 0.361741371 | 0.342994742 | -           |   |
| RPL31P11  | 641311 | 1572  | 0.130016646 | -           | -           | 0.386314624 |   |
| GPR110    | 266977 | 1437  | 0.142231154 | 0.155067978 | 0.147031845 | 0.140869077 |   |
| MIER2     | 54531  | 2825  | 0.072349086 | -           | -           | 0.071656235 |   |
| LINC00238 | 440184 | 1164  | 0.175589491 | 0.191437014 | -           | -           |   |
| CCR3      | 1232   | 1796  | 0.113800762 | 4.466579427 | 0.117641849 | 8.453321114 |   |
| FGFBP2    | 83888  | 1188  | 0.172042229 | -           | -           | -           |   |
| CMTM2     | 146225 | 1073  | 0.190481051 | 1.03836293  | 0.196910309 | 2.452539812 |   |
| CLVS1     | 157807 | 3506  | 0.058296112 | -           | -           | -           |   |
| TCAP      | 8557   | 963   | 0.212239011 | 0.694182819 | 0.877610639 | 0.210206504 |   |
| CLEC4M    | 10332  | 2424  | 0.084317726 | -           | -           | -           |   |
| GIPC3     | 126326 | 4317  | 0.047344491 | 0.154852456 | 0.048942497 | -           |   |
| APOL3     | 80833  | 3654  | 0.055934912 | 1.768513371 | 0.057822868 | 4.376540825 |   |
| UBE2MP1   | 606551 | 961   | 0.212680716 | -           | -           | 0.210643978 |   |
| INHBA     | 3624   | 2175  | 0.093970652 | 0.102451809 | -           | 1.489131865 |   |
| DMRTA2    | 63950  | 3114  | 0.065634608 | -           | -           | -           |   |
| C17orf49  | 124944 | 913   | 0.223862177 | 0.244066467 | 0.231418139 | 0.443436721 |   |
| C5orf64   | 285668 | 2970  | 0.068816892 | 0.15005568  | -           | 0.204473599 |   |
| EFCAB9    | 285588 | 712   | 0.287059225 | 0.312967254 | -           | 0.852930602 |   |
| C6orf97   | 80129  | 5283  | 0.03868752  | 0.126537584 | -           | 0.114951086 |   |
| SLC6A3    | 6531   | 3952  | 0.051717148 | -           | -           | -           |   |
| LOC44092  | 440925 | 2129  | 0.096001018 | -           | -           | -           |   |
| LOC34496  | 344967 | 1613  | 0.126711821 | 0.138147976 | 0.261977385 | 0.627491826 |   |
| HCG4B     | 80868  | 1060  | 0.19281714  | -           | -           | -           |   |
| FMR1-AS1  | 1E+08  | 3026  | 0.067543347 | -           | 0.06982312  | 0.066896518 |   |
| SCN3B     | 55800  | 6081  | 0.033610618 | 0.146576343 | 0.034745068 | 0.033288746 |   |

|           |        |      |             |             |             |             |
|-----------|--------|------|-------------|-------------|-------------|-------------|
| ZC3H12C   | 85463  | 8807 | 0.023207241 | -           | -           | 0.022984996 |
| NEFH      | 4744   | 3721 | 0.054927753 | -           | 0.170345145 | 0.326410421 |
| DPY19L2P3 | 442524 | 1124 | 0.181838228 | -           | -           | -           |
| FCAMR     | 83953  | 2783 | 0.073440952 | 0.080069236 | -           | -           |
| DTNA      | 1837   | 6537 | 0.03126605  | -           | -           | -           |
| LIPJ      | 142910 | 1496 | 0.13662177  | -           | -           | -           |
| GRHL3     | 57822  | 2879 | 0.070992069 | 0.154798669 | -           | 0.070312214 |
| GAD1      | 2571   | 3488 | 0.058596952 | -           | -           | 0.058035798 |
| SAMD7     | 344658 | 2279 | 0.089682391 | -           | 0.092709417 | -           |
| C21orf88  | 114041 | 1469 | 0.139132858 | -           | -           | -           |
| LOC100133 | 1E+08  | 799  | 0.255802463 | -           | 0.264436497 | -           |
| LAMC3     | 10319  | 6107 | 0.033467524 | 0.036488077 | -           | -           |
| PODNL1    | 79883  | 3332 | 0.061340387 | 0.401259336 | 0.063410793 | 0.24301184  |
| C6orf201  | 404220 | 1681 | 0.121586061 | 0.132559598 | -           | -           |
| CLDN5     | 7122   | 2332 | 0.087644154 | 0.191108649 | 0.362409539 | -           |
| FGL1      | 2267   | 1500 | 0.136257445 | -           | 0.140856508 | -           |
| A4GNT     | 51146  | 1771 | 0.11540721  | -           | 0.119302519 | -           |
| C3orf32   | 51066  | 1545 | 0.132288782 | 0.144228275 | 0.410261673 | 0.262043836 |
| CD2       | 914    | 1595 | 0.128141798 | 0.139707012 | -           | -           |
| PPM1J     | 333926 | 1762 | 0.11599669  | 0.126465769 | -           | 0.114885847 |
| FAM90A20  | 728430 | 1395 | 0.146513382 | -           | -           | -           |
| PRSS27    | 83886  | 1462 | 0.139799021 | 0.457249011 | 0.289035241 | 0.415380704 |
| TTLL9     | 164395 | 1607 | 0.127184921 | -           | -           | -           |
| TEKT4     | 150483 | 1471 | 0.13894369  | -           | -           | -           |
| C20orf165 | 128497 | 752  | 0.271790117 | -           | 0.561927557 | -           |
| LOC386758 | 386758 | 1688 | 0.121081853 | -           | -           | -           |
| CD6       | 923    | 3307 | 0.061804103 | -           | 0.063890161 | 0.122424471 |
| PTENP1    | 11191  | 3932 | 0.051980206 | -           | -           | 0.051482417 |
| LRRN4     | 164312 | 2740 | 0.074593492 | 0.081325797 | 0.077111227 | -           |
| LOC729020 | 729020 | 2130 | 0.095955947 | -           | -           | -           |
| LOC646870 | 646870 | 1369 | 0.149295959 | -           | -           | -           |
| B3GNT3    | 10331  | 2720 | 0.075141974 | -           | -           | 0.074422376 |
| CETN4P    | 729338 | 629  | 0.324938264 | 0.354265    | 0.671811642 | -           |
| HIST1H2AH | 85235  | 439  | 0.465572137 | 0.507591537 | 0.481286472 | 0.461113583 |
| KDR       | 3791   | 6055 | 0.033754941 | -           | 0.069788526 | -           |
| SLC7A9    | 11136  | 1789 | 0.114246041 | -           | -           | -           |
| DNAJB7    | 150353 | 2578 | 0.079280903 | -           | 0.163913702 | 0.078521669 |
| CREB3L1   | 90993  | 2702 | 0.075642549 | 0.082469535 | 0.31278277  | 0.074918158 |
| C2CD4C    | 126567 | 3124 | 0.06542451  | -           | -           | -           |
| CDC20B    | 166979 | 2984 | 0.068494024 | 0.149351665 | -           | -           |
| C11orf94  | 143678 | 369  | 0.553892054 | -           | -           | -           |
| LOC283440 | 283440 | 571  | 0.357944252 | -           | -           | 0.354516397 |
| BCL2L14   | 79370  | 1930 | 0.105899569 | -           | -           | -           |
| GLRA4     | 441509 | 1675 | 0.122021593 | -           | -           | -           |
| EFNB3     | 1949   | 3236 | 0.063160126 | -           | -           | -           |
| TRIM63    | 84676  | 1764 | 0.115865175 | -           | -           | -           |
| MAB21L2   | 10586  | 2785 | 0.073388211 | 0.160023472 | 0.075865264 | -           |
| LOC285889 | 285889 | 2698 | 0.075754695 | -           | -           | -           |
| SULF2     | 55959  | 4248 | 0.048113505 | 0.577014956 | 0.198949869 | 1.763151584 |
| ZNF883    | 169834 | 2379 | 0.085912639 | -           | -           | -           |
| LCTL      | 197021 | 2128 | 0.096046132 | 0.41885843  | 0.397151807 | 0.475631727 |
| HIST1H1B  | 3009   | 790  | 0.258716668 | -           | 0.802347195 | 0.256239067 |
| ZNF682    | 91120  | 3207 | 0.063731265 | 0.208449658 | 0.06588237  | 0.126241885 |
| CLDN7     | 1366   | 2029 | 0.100732463 | 0.878591167 | 0.31239738  | 2.394427162 |
| NOX3      | 50508  | 2044 | 0.099993233 | -           | -           | -           |
| NACAP1    | 83955  | 704  | 0.290321261 | 0.9495711   | 0.3001204   | 0.575081997 |
| PPP1R1A   | 5502   | 1849 | 0.11053876  | 0.241030486 | 0.114269747 | -           |
| ARL13A    | 392509 | 1539 | 0.132804528 | 0.434371705 | -           | 0.263065449 |
| MYRIP     | 25924  | 4884 | 0.04184811  | 0.136875113 | -           | 0.165789405 |
| KIAA1644  | 85352  | 6741 | 0.030319859 | 0.066112649 | 0.094029711 | 0.030029501 |
| LOC400230 | 400236 | 1086 | 0.188200891 | 0.205186634 | -           | 0.186398585 |
| CECR7     | 1E+08  | 2726 | 0.074976584 | -           | 0.155014498 | 0.07425857  |

|           |          |       |             |             |             |             |
|-----------|----------|-------|-------------|-------------|-------------|-------------|
| PLA2G7    | 7941     | 1880  | 0.108716047 | 0.355584071 | 0.112385511 | 0.430699708 |
| FAM7A3    | 89837    | 1162  | 0.175891711 | 0.958832551 | 0.363657076 | -           |
| NANOG     | 79923    | 2098  | 0.097419527 | 0.531059783 | 0.402830813 | 0.385946355 |
| A1CF      | 29974    | 9529  | 0.021448858 | -           | -           | -           |
| LTBP4     | 8425     | 5163  | 0.039586707 | -           | -           | -           |
| GPR37     | 2861     | 3058  | 0.066836549 | -           | -           | -           |
| OGN       | 4969     | 3068  | 0.066618699 | 0.21789376  | 0.482070838 | 0.263922898 |
| RPS10P7   | 376693   | 699   | 0.292397951 | -           | 0.302267184 | 0.289597801 |
| LOC283914 | 283914   | 1371  | 0.149078168 | 0.487598873 | -           | -           |
| RPH3A     | 22895    | 4605  | 0.044383533 | -           | -           | -           |
| CRIP2     | 1397     | 1236  | 0.165360977 | -           | 0.170942364 | -           |
| RAD21L1   | 642636   | 1808  | 0.113045447 | -           | -           | -           |
| CORIN     | 10699    | 4942  | 0.041356975 | 0.22544788  | 0.213764429 | 0.163843677 |
| EGFEM1P   | 93556    | 3855  | 0.053018461 | -           | 0.05480798  | 0.05251073  |
| KIAA0408  | 9729     | 8124  | 0.025158317 | -           | -           | -           |
| FAM9C     | 171484   | 1255  | 0.162857504 | -           | -           | -           |
| ACOT6     | 641372   | 1004  | 0.203571881 | -           | -           | -           |
| GPR179    | 440435   | 7980  | 0.025612302 | -           | 0.105907149 | 0.101468102 |
| ACRV1     | 56       | 1189  | 0.171897534 | 0.187411846 | 0.355399094 | 0.340502713 |
| EBI3      | 10148    | 1149  | 0.177881782 | 3.490851458 | 2.206629361 | 12.33248077 |
| IL17C     | 27189    | 1048  | 0.19502497  | 0.637879823 | -           | 0.579471936 |
| FAM174B   | 400451   | 2630  | 0.077713372 | 0.084727257 | 0.080336411 | 0.076969149 |
| MYBPH     | 4608     | 1806  | 0.113170636 | 0.246769308 | 0.935923638 | 0.560434283 |
| PPP1R1B   | 84152    | 1841  | 0.111019103 | -           | 0.459065207 | 0.219911855 |
| LHB       | 3972     | 523   | 0.390795732 | 0.426066319 | -           | -           |
| BFSP1     | 631      | 2215  | 0.092273665 | 0.201203327 | 0.095388154 | -           |
| LINC00102 | 1E+08    | 1352  | 0.151173201 | 0.164817075 | -           | -           |
| RXFP4     | 339403   | 1146  | 0.178347442 | 1.166663271 | 0.55310147  | 1.236476475 |
| SPINT2    | 10653    | 1817  | 0.112485508 | -           | -           | -           |
| HGD       | 3081     | 2012  | 0.101583583 | 0.110751831 | 0.210024614 | 0.100610767 |
| PCDHB8    | 56128    | 2711  | 0.07539143  | -           | -           | -           |
| ZDHHC19   | 131540   | 1370  | 0.149186984 | -           | -           | -           |
| NCAN      | 1463     | 6406  | 0.031905427 | -           | -           | -           |
| HMX2      | 3167     | 1628  | 0.125544329 | 0.684375567 | 0.648908972 | 0.124342053 |
| PLEK2     | 26499    | 1479  | 0.138192135 | -           | -           | -           |
| PPBP      | 5473     | 1307  | 0.156378093 | 0.511475175 | 0.484968848 | 0.309761076 |
| PPP1R3G   | 648791   | 1745  | 0.117126744 | -           | 0.121080092 | -           |
| TMEM191   | 84222    | 1978  | 0.103329711 | 0.225311107 | -           | 0.102340173 |
| SIT1      | 27240    | 1238  | 0.165093835 | -           | -           | -           |
| PGPEP1L   | 145814   | 1483  | 0.137819399 | -           | -           | 0.13649957  |
| C6orf124  | 653483   | 2311  | 0.088440575 | 0.096422624 | 0.274277059 | 0.087593623 |
| TMEM150   | 441027   | 1888  | 0.108255386 | -           | -           | -           |
| LOC10050  | 1.01E+08 | 1507  | 0.135624531 | 0.295730172 | 0.280404461 | 0.134325722 |
| INHA      | 3623     | 1436  | 0.142330201 | 0.155175964 | 0.147134235 | -           |
| PM20D1    | 148811   | 2200  | 0.092902804 | 0.101287584 | -           | -           |
| NMUR1     | 10316    | 3274  | 0.062427052 | 0.544490372 | -           | 0.989267504 |
| ADAM21    | 8747     | 2666  | 0.076663979 | 0.167166305 | 0.158503197 | -           |
| BAI3      | 577      | 5650  | 0.036174543 | -           | -           | -           |
| C9orf117  | 286207   | 1722  | 0.118691154 | -           | 0.368091919 | -           |
| CYP26A1   | 1592     | 2245  | 0.091040609 | 1.68737445  | 0.094113479 | 0.811518827 |
| HLA-H     | 3136     | 1839  | 0.111139841 | 1.211705735 | -           | 1.981359181 |
| GLRA1     | 2741     | 1835  | 0.111382108 | -           | 0.115141559 | -           |
| FP588     | 92973    | 5245  | 0.038967811 | 0.042484783 | 0.040283081 | 0.038594635 |
| CTSL1P2   | 1517     | 1105  | 0.184964858 | 0.403317076 | -           | -           |
| C10orf55  | 414236   | 2516  | 0.081234566 | 0.26569875  | 0.16795291  | 0.402283114 |
| ZNF177    | 7730     | 2459  | 0.083117596 | -           | -           | -           |
| CERS3     | 204219   | 3894  | 0.05248746  | 0.057224624 | 0.054259055 | -           |
| SYTL5     | 94122    | 4821  | 0.042394974 | -           | -           | -           |
| FAM65B    | 9750     | 5471  | 0.037358101 | 0.040729791 | 0.386190388 | 2.072019069 |
| MAP1B     | 4131     | 11996 | 0.01703786  | 0.037151165 | 0.070451738 | 0.033749394 |
| ZNF732    | 654254   | 2193  | 0.093199347 | 0.101610891 | -           | 0.092306823 |
| PATE3     | 1E+08    | 1336  | 0.152983659 | 0.166790932 | 0.158147276 | 0.15151861  |

|           |          |       |             |             |             |             |   |
|-----------|----------|-------|-------------|-------------|-------------|-------------|---|
| BMPR1B    | 658      | 5560  | 0.036760102 | -           | -           | -           | - |
| ITGB3     | 3690     | 4894  | 0.041762601 | 0.045531811 | 0.043172203 | 0.41362661  |   |
| GLIS1     | 148979   | 2816  | 0.072580315 | -           | -           | -           |   |
| BIK       | 638      | 963   | 0.212239011 | 1.388365637 | 0.43880532  | 1.051032518 |   |
| CALHM3    | 119395   | 1699  | 0.120297921 | -           | 0.497433223 | -           |   |
| ID3       | 3399     | 1288  | 0.158684913 | 0.173006743 | -           | 1.728817929 |   |
| FXVD1     | 5348     | 558   | 0.366283455 | -           | -           | -           |   |
| UGT2B11   | 10720    | 1722  | 0.118691154 | 0.388210252 | 0.245394612 | 1.293099589 |   |
| PCDHGC5   | 56097    | 4641  | 0.044039252 | 0.048013938 | 0.045525697 | 0.08723502  |   |
| TNFRSF17  | 608      | 994   | 0.205619887 | 0.224177751 | 0.425120244 | 0.407301535 |   |
| NAGS      | 162417   | 2086  | 0.097979946 | -           | 0.101287038 | -           |   |
| RND1      | 27289    | 1665  | 0.122754455 | 0.669167221 | 0.126897755 | 0.851052277 |   |
| DEFA5     | 1670     | 449   | 0.455203047 | 0.496286603 | -           | -           |   |
| ADPRH     | 141      | 3461  | 0.059054079 | -           | -           | -           |   |
| FAM83A    | 84985    | 2946  | 0.069377518 | 0.075639065 | 0.071719199 | -           |   |
| IL13RA2   | 3598     | 1376  | 0.148536459 | -           | -           | -           |   |
| FAM105A   | 54491    | 7064  | 0.028933489 | 0.063089662 | 0.089730221 | 0.11462563  |   |
| ABHD1     | 84696    | 1471  | 0.13894369  | -           | -           | 0.137613095 |   |
| LOC283050 | 283050   | 2450  | 0.083422926 | 1.000473278 | -           | 3.470209079 |   |
| FAM186A   | 121006   | 7265  | 0.028132989 | -           | 0.05816511  | 0.055727147 |   |
| C16orf45  | 89927    | 2234  | 0.091488885 | 0.598476324 | -           | 0.634289186 |   |
| CRYBA1    | 1411     | 806   | 0.253580854 | -           | -           | -           |   |
| TUBA3E    | 112714   | 1554  | 0.131522631 | 0.143392976 | -           | 0.130263104 |   |
| C11orf20  | 25858    | 764   | 0.267521162 | 0.291665818 | -           | -           |   |
| ZNF625-ZN | 1.01E+08 | 3418  | 0.059797006 | -           | -           | -           |   |
| CCL28     | 56477    | 816   | 0.250473245 | 0.546158541 | 0.517854807 | 0.496149174 |   |
| TAS2R31   | 259290   | 1021  | 0.200182339 | 0.218249446 | 0.413878083 | -           |   |
| LOC100137 | 1E+08    | 1332  | 0.153443069 | 0.334583611 | 0.158622193 | 0.455920863 |   |
| SIAH3     | 283514   | 4005  | 0.051032751 | -           | -           | 0.101088071 |   |
| CHST8     | 64377    | 2340  | 0.087344516 | -           | -           | -           |   |
| FGF22     | 27006    | 513   | 0.398413583 | -           | -           | -           |   |
| FAM25A    | 643161   | 362   | 0.564602674 | -           | 0.583659562 | -           |   |
| TRIM2     | 23321    | 6792  | 0.030092192 | -           | 0.031107886 | -           |   |
| LILRA3    | 11026    | 1651  | 0.123795377 | 0.404904939 | -           | 0.980878803 |   |
| VPS37D    | 155382   | 1609  | 0.127026829 | 0.415474241 | 0.262628665 | 0.62905178  |   |
| POU3F3    | 5455     | 1503  | 0.135985474 | 0.148258606 | 0.562301427 | -           |   |
| MGLL      | 11343    | 4617  | 0.044268176 | 0.241317614 | -           | 6.138193808 |   |
| TLX2      | 3196     | 2170  | 0.094187174 | -           | -           | -           |   |
| HIST1H2BE | 8344     | 435   | 0.46985326  | -           | 0.485712095 | 0.465353708 |   |
| CLDN11    | 5010     | 2761  | 0.074026138 | -           | -           | 0.073317227 |   |
| C22orf24  | 25775    | 1247  | 0.1639023   | 0.178695016 | 0.169434452 | -           |   |
| SLC28A1   | 9154     | 2750  | 0.074322243 | -           | -           | -           |   |
| TBX15     | 6913     | 3513  | 0.058179951 | 0.317154405 | 0.180431052 | 0.172868371 |   |
| SRRM4     | 84530    | 8494  | 0.024062417 | -           | 0.024874589 | 0.071495949 |   |
| CNN3      | 1266     | 2082  | 0.098168188 | -           | -           | -           |   |
| LOC407835 | 407835   | 1737  | 0.117666188 | -           | -           | -           |   |
| SPATC1    | 375686   | 2065  | 0.098976353 | 0.539546452 | 0.204634151 | 1.764513091 |   |
| GPR98     | 84059    | 19333 | 0.010571881 | 0.011526027 | 0.021857421 | -           |   |
| MORN3     | 283385   | 1172  | 0.174390928 | 0.380260554 | 0.1802771   | 0.345441746 |   |
| LINC00410 | 144776   | 2018  | 0.10128155  | 0.11042254  | 0.20940016  | -           |   |
| ACHE      | 43       | 2978  | 0.068632024 | -           | 0.070948543 | 0.135949539 |   |
| MYOM3     | 127294   | 5800  | 0.035238994 | 0.115258285 | 0.036428407 | 0.104704584 |   |
| HIST1H2BH | 8345     | 425   | 0.480908631 | 0.524312199 | 0.497140615 | 0.476303207 |   |
| KCNE1L    | 23630    | 1465  | 0.139512743 | 0.152104222 | 0.43266504  | 0.138176698 |   |
| TDRD5     | 163589   | 3836  | 0.053281066 | -           | 0.165238343 | -           |   |
| DDC       | 1644     | 2090  | 0.097792425 | -           | 0.101093187 | -           |   |
| OCM       | 654231   | 744   | 0.274712591 | 0.299506297 | -           | -           |   |
| FAM19A2   | 338811   | 4069  | 0.050230073 | 0.109527002 | 0.103850952 | 0.149247134 |   |
| TREML3    | 340206   | 1137  | 0.179759163 | 0.195983012 | -           | 0.890188491 |   |
| SAMD11    | 148398   | 2575  | 0.079373269 | -           | -           | -           |   |
| ST13P4    | 145165   | 1599  | 0.127821243 | -           | 0.132135561 | -           |   |
| HOXB3     | 3213     | 3627  | 0.056351301 | -           | -           | 0.167434957 |   |

|           |          |       |             |             |             |             |
|-----------|----------|-------|-------------|-------------|-------------|-------------|
| GPR4      | 2828     | 3057  | 0.066858413 | 0.072892602 | 0.069115068 | 0.066218143 |
| MGP       | 4256     | 1473  | 0.138755036 | -           | -           | 0.412278743 |
| TMPRSS12  | 283471   | 1478  | 0.138285635 | -           | -           | -           |
| LGALS2    | 3957     | 543   | 0.376401783 | -           | 1.167319124 | -           |
| ACP5      | 54       | 1640  | 0.124625712 | -           | -           | -           |
| PENK      | 5179     | 1354  | 0.150949903 | 0.329147245 | -           | 0.14950433  |
| CCDC11    | 220136   | 1837  | 0.111260843 | 0.242604992 | 0.115016201 | -           |
| PLP1      | 5354     | 3148  | 0.06492572  | 0.070785478 | -           | -           |
| LRRC71    | 149499   | 1989  | 0.102758254 | 0.336097564 | 0.106226627 | -           |
| IQCA1     | 79781    | 3250  | 0.062888052 | -           | -           | -           |
| ASB12     | 142689   | 1293  | 0.158071282 | 0.68935092  | -           | 0.313115024 |
| SAMD3     | 154075   | 1052  | 0.19428343  | 0.423636283 | -           | 0.192422874 |
| DNALI1    | 7802     | 2663  | 0.076750345 | 0.083677313 | 0.238022638 | 0.076015345 |
| FGF6      | 2251     | 744   | 0.274712591 | -           | -           | -           |
| MCHR1     | 2847     | 2423  | 0.084352525 | -           | -           | 0.083544723 |
| RNU5D-1   | 26830    | 100   | 2.04386168  | -           | -           | 4.048577259 |
| KLF17     | 128209   | 3131  | 0.06527824  | 0.213509439 | 0.067481559 | 1.48702135  |
| CBX3P2    | 645158   | 510   | 0.400757192 | 1.310780498 | -           | 0.396919339 |
| C10orf53  | 282966   | 642   | 0.318358517 | -           | 0.32910399  | -           |
| PLXNA2    | 5362     | 11457 | 0.017839414 | 0.252843231 | 0.036883087 | 0.0706743   |
| COX7A1    | 1346     | 783   | 0.261029589 | -           | -           | 0.258529838 |
| PCDHA3    | 56145    | 5260  | 0.038856686 | -           | -           | -           |
| XKRX      | 402415   | 2854  | 0.071613934 | -           | -           | -           |
| ESAM      | 90952    | 1869  | 0.109355895 | -           | 0.113046956 | 0.108308648 |
| GTF2IRD2  | 84163    | 3551  | 0.057557355 | 0.188256281 | 0.059500074 | 0.228024627 |
| DCDC5     | 1.01E+08 | 4773  | 0.042821322 | 0.046686085 | 0.132799976 | 0.084822486 |
| LUM       | 4060     | 2116  | 0.096590817 | -           | -           | -           |
| ZNF485    | 220992   | 2072  | 0.098641973 | -           | -           | 0.097697328 |
| A2M       | 2        | 4678  | 0.043690929 | 0.333439246 | 0.090331236 | 2.423261292 |
| GPR44     | 11251    | 2910  | 0.070235797 | 0.229724417 | 1.234309602 | 2.086895494 |
| NANOGB    | 360030   | 907   | 0.225343074 | 0.491362039 | -           | 0.223185075 |
| RARRES3   | 5920     | 779   | 0.26236992  | 20.30952582 | 0.542451249 | 93.80849747 |
| LYPD3     | 27076    | 1745  | 0.117126744 | -           | -           | -           |
| CCDC116   | 164592   | 2252  | 0.090757623 | -           | 0.375283768 | 0.179776965 |
| CLRN1     | 7401     | 2398  | 0.08523193  | -           | -           | -           |
| VENTXP1   | 139538   | 2716  | 0.075252639 | 0.164088869 | -           | -           |
| PRKCH     | 5583     | 3522  | 0.05803128  | -           | -           | -           |
| CALN1     | 83698    | 9510  | 0.021491711 | 0.140588445 | 0.088868459 | 0.063857685 |
| MURC      | 347273   | 2640  | 0.077419003 | 0.16881264  | 0.160064213 | 0.230032799 |
| SLC27A6   | 28965    | 2839  | 0.07199231  | -           | 0.148844495 | -           |
| PFKFB1    | 5207     | 1733  | 0.117937777 | 0.128582045 | 0.1219185   | -           |
| LOC28385  | 283856   | 2678  | 0.076320451 | -           | -           | 0.075589568 |
| SPEF1     | 25876    | 1597  | 0.12798132  | -           | 0.13230104  | -           |
| ATO7      | 220202   | 1487  | 0.137448667 | -           | -           | -           |
| PLA2G4C   | 8605     | 2567  | 0.079620634 | 0.086806656 | -           | 0.394290734 |
| ZNF717    | 1E+08    | 3068  | 0.066618699 | 0.145262506 | 0.068867263 | 0.065980725 |
| C1QTNF4   | 114900   | 1436  | 0.142330201 | -           | 0.147134235 | 0.140967175 |
| ICAM5     | 7087     | 3005  | 0.068015364 | 0.148307943 | 0.492177481 | 0.404184086 |
| LOC10050  | 1.01E+08 | 2689  | 0.076008244 | 0.165736471 | 0.235721192 | -           |
| EDARADD   | 128178   | 2891  | 0.070697395 | 0.077078065 | 0.073083626 | 0.350101804 |
| SYT13     | 57586    | 5184  | 0.039426344 | -           | 0.122271274 | 0.039048778 |
| KRTAP10-2 | 386679   | 1071  | 0.190836758 | -           | -           | -           |
| NOS1      | 4842     | 12291 | 0.016628929 | 0.108778465 | 0.085951005 | 0.098818093 |
| INTS4L2   | 644619   | 1722  | 0.118691154 | 0.129403417 | -           | -           |
| ITGA9     | 3680     | 3962  | 0.051586615 | 0.056242475 | 0.053327804 | 0.255462977 |
| MAMDC2    | 256691   | 3618  | 0.056491478 | -           | 0.05839822  | -           |
| SLC35G6   | 643664   | 1195  | 0.17103445  | -           | 0.176807332 | 0.338793076 |
| SIX3      | 6496     | 2533  | 0.080689368 | -           | 0.083412855 | -           |
| FGF2      | 2247     | 6774  | 0.030172154 | 0.131581154 | 0.124762186 | 0.05976642  |
| ISLR2     | 57611    | 4833  | 0.04228971  | -           | -           | -           |
| CETP      | 1071     | 1717  | 0.11903679  | -           | 0.123054608 | 0.825277834 |
| LOC10012  | 1E+08    | 3667  | 0.055736615 | -           | 0.057617879 | -           |



|           |          |      |             |             |             |             |
|-----------|----------|------|-------------|-------------|-------------|-------------|
| EFHB      | 151651   | 2857 | 0.071538736 | 0.233986018 | 0.221860092 | -           |
| CPNE5     | 57699    | 3339 | 0.06121179  | -           | 0.253111424 | -           |
| CSAG1     | 158511   | 885  | 0.230944823 | -           | -           | 5.489596284 |
| RPL29P2   | 118432   | 657  | 0.311090058 | 1.017500844 | -           | -           |
| UNC13A    | 23025    | 9847 | 0.020756186 | 0.045259    | -           | 0.041114829 |
| TRPM4     | 54795    | 4103 | 0.049813836 | 1.737910288 | 0.308971135 | 17.95859277 |
| ZNF474    | 133923   | 1972 | 0.103644101 | -           | 0.107142374 | 0.102651553 |
| MIP       | 4284     | 2608 | 0.078368929 | -           | -           | 0.232855287 |
| BCL2L10   | 10017    | 887  | 0.23042409  | -           | -           | -           |
| COPZ2     | 51226    | 923  | 0.221436802 | 0.241422194 | -           | 0.219316211 |
| TIGIT     | 201633   | 2978 | 0.068632024 | -           | -           | -           |
| TMEM204   | 79652    | 943  | 0.216740369 | -           | 0.224055951 | -           |
| TTC36     | 143941   | 679  | 0.301010557 | -           | 0.311170488 | -           |
| PHLDA2    | 7262     | 937  | 0.218128248 | -           | 1.352944043 | 0.216039341 |
| KHDC1     | 80759    | 1147 | 0.178191951 | 0.971371773 | 0.552619254 | 0.529456485 |
| PCDHB5    | 26167    | 2925 | 0.069875613 | 0.076182114 | -           | 0.069206449 |
| IQCF3     | 401067   | 1319 | 0.154955397 | -           | -           | -           |
| KCNH1     | 3756     | 8106 | 0.025214183 | -           | -           | 0.024972719 |
| HEY1      | 23462    | 2331 | 0.087681754 | -           | -           | -           |
| UBE2F-SCL | 1.01E+08 | 2972 | 0.068770581 | 0.07497735  | 0.142183554 | -           |
| LOC100288 | 1E+08    | 2147 | 0.095196166 | -           | -           | 0.094284519 |
| DUSP13    | 51207    | 1788 | 0.114309937 | 0.124626781 | -           | 0.905721982 |
| CCDC40    | 55036    | 4297 | 0.047564852 | 0.051857734 | 0.098340592 | -           |
| TKTL2     | 84076    | 2837 | 0.072043062 | -           | -           | -           |
| C10orf67  | 256815   | 2943 | 0.069448239 | -           | -           | 0.068783168 |
| IL12B     | 3593     | 2347 | 0.087084009 | -           | 0.180046665 | -           |
| HIST1H2BC | 8339     | 445  | 0.45929476  | -           | 0.474797217 | -           |
| LOC100509 | 1.01E+08 | 701  | 0.29156372  | -           | -           | -           |
| FAM205B   | 389715   | 6144 | 0.033265978 | -           | -           | -           |
| LOC440704 | 440704   | 2232 | 0.091570864 | 0.199670864 | 0.094661631 | -           |
| LOC285847 | 285847   | 1813 | 0.112733683 | -           | 0.116538754 | 0.223308178 |
| GP5       | 2814     | 3493 | 0.058513074 | 0.063794069 | 0.060488051 | -           |
| PLEKHG7   | 440107   | 3267 | 0.062560811 | 0.068207127 | -           | 0.123923393 |
| ZCCHC12   | 170261   | 2212 | 0.09239881  | -           | 0.095517523 | 0.091513953 |
| CFL1P1    | 142913   | 2141 | 0.095462946 | 0.104078788 | -           | 0.472743725 |
| AMICA1    | 120425   | 2195 | 0.093114427 | 4.060732296 | 0.962572945 | 36.24352763 |
| LOC100129 | 1E+08    | 729  | 0.280365114 | 0.305668978 | -           | -           |
| KCNMB1    | 3779     | 1518 | 0.134641744 | -           | 0.139186272 | -           |
| GYS2      | 2998     | 3132 | 0.065257397 | -           | -           | 0.129264919 |
| LOC149773 | 149773   | 2099 | 0.097373115 | -           | -           | -           |
| LOC339894 | 339894   | 2016 | 0.101382028 | -           | -           | -           |
| PADI3     | 51702    | 3189 | 0.06409099  | 0.139750821 | 0.198762711 | 0.253908891 |
| SLC1A6    | 6511     | 1719 | 0.118898294 | -           | -           | -           |
| CD14      | 929      | 1648 | 0.124020733 | -           | -           | -           |
| LOC100128 | 1E+08    | 2517 | 0.081202292 | 0.088531063 | 0.083943092 | 0.160849315 |
| C22orf36  | 388886   | 1240 | 0.164827555 | 0.359407556 | -           | -           |
| GRK7      | 131890   | 1746 | 0.117059661 | -           | -           | 0.115938639 |
| CYP4A11   | 1579     | 2552 | 0.080088624 | 0.087316883 | -           | 0.15864331  |
| SLC2A14   | 144195   | 2195 | 0.093114427 | 0.40607323  | 0.096257294 | 1.475563466 |
| SHF       | 90525    | 2517 | 0.081202292 | 0.088531063 | 0.083943092 | 0.160849315 |
| HAVCR1    | 26762    | 1841 | 0.111019103 | 0.121038938 | 0.68859781  | 0.98960335  |
| RASGEF1B  | 153020   | 2269 | 0.090077641 | 0.196414883 | 0.65182606  | 6.334265875 |
| C1QTNF2   | 114898   | 2411 | 0.084772363 | -           | -           | 0.08396054  |
| C2orf61   | 285051   | 2139 | 0.095552206 | -           | 0.296332064 | -           |
| TEDDM1    | 127670   | 2500 | 0.081754467 | 0.089133074 | 0.084513905 | -           |
| SETBP1    | 26040    | 9899 | 0.020647153 | -           | 0.042688102 | -           |
| MALL      | 7851     | 3071 | 0.06655362  | 0.072560301 | 0.068799987 | 0.197748808 |
| NOD2      | 64127    | 4485 | 0.045571052 | 0.049683988 | 0.0942184   | 0.045134641 |
| LOC643719 | 643719   | 619  | 0.330187671 | 0.359988182 | -           | 0.327025627 |
| TTC16     | 158248   | 2884 | 0.07086899  | -           | 0.073261013 | -           |
| SCUBE1    | 80274    | 3885 | 0.052609052 | 0.05735719  | -           | 0.781578621 |
| MARK2P9   | 1.01E+08 | 2000 | 0.102193084 | 0.222832685 | 0.105642381 | 0.404857726 |

|           |          |      |             |             |             |             |
|-----------|----------|------|-------------|-------------|-------------|-------------|
| EPB41L1   | 2036     | 6276 | 0.032566311 | 0.071011053 | 0.033665513 | 0.419307715 |
| CCDC153   | 283152   | 773  | 0.264406427 | -           | -           | 0.261874338 |
| BAGE      | 574      | 1004 | 0.203571881 | -           | -           | -           |
| PCDH11Y   | 83259    | 4964 | 0.041173684 | 0.089779486 | 0.170253635 | 0.081558768 |
| RAP1GAP   | 5909     | 3334 | 0.06130359  | -           | -           | -           |
| ZNF205    | 7755     | 2077 | 0.09840451  | 0.107285838 | 0.101725932 | -           |
| CYP2A6    | 1548     | 1775 | 0.115147137 | -           | 0.119033668 | -           |
| NR1I3     | 9970     | 1414 | 0.144544673 | 0.1575903   | -           | 0.143160441 |
| SRRM3     | 222183   | 3651 | 0.055980873 | -           | -           | -           |
| KIAA1239  | 57495    | 7477 | 0.027335317 | 0.029802419 | -           | -           |
| RIMBP3    | 85376    | 5796 | 0.035263314 | -           | 0.14581419  | 0.104776844 |
| AMTN      | 401138   | 1072 | 0.190658739 | -           | -           | -           |
| KRBA2     | 124751   | 1964 | 0.104066277 | 0.226917194 | 0.107578799 | 0.206139372 |
| LOC100133 | 1E+08    | 661  | 0.309207516 | 0.674229001 | -           | -           |
| LINC00483 | 55018    | 1023 | 0.199790976 | 0.217822761 | 0.206534469 | 0.395755353 |
| DPYSL5    | 56896    | 5225 | 0.03911697  | 0.127942211 | 0.040437275 | 0.232454197 |
| PLEKHG1   | 57480    | 7237 | 0.028241836 | 0.061581507 | 0.116780302 | 0.055942756 |
| LEFTY1    | 10637    | 1644 | 0.124322487 | -           | 0.128518711 | -           |
| LOC646813 | 646813   | 1282 | 0.159427588 | 0.347632894 | -           | -           |
| CNRIP1    | 25927    | 2037 | 0.100336852 | 0.218785159 | 0.103723496 | 0.298127928 |
| HIST1H3J  | 8356     | 478  | 0.427586126 | 0.466177165 | 0.442018329 | -           |
| LINC00235 | 64493    | 561  | 0.36432472  | 1.191618635 | -           | -           |
| LGI4      | 163175   | 2906 | 0.070332474 | -           | -           | 0.069658934 |
| P2RX2     | 22953    | 1908 | 0.107120633 | 0.116788619 | -           | -           |
| OTP       | 23440    | 2702 | 0.075642549 | -           | -           | -           |
| H3F3AP5   | 347376   | 460  | 0.444317757 | -           | 0.459314699 | -           |
| ZNF599    | 148103   | 3115 | 0.065613537 | 0.143070745 | 0.203484521 | 0.064985189 |
| LRRC3     | 81543    | 2520 | 0.081105622 | 0.176851337 | 0.335372637 | 0.160657828 |
| C6orf138  | 442213   | 3268 | 0.062541667 | -           | 0.06465262  | 0.123885473 |
| TMEM221   | 1E+08    | 1930 | 0.105899569 | 0.346372049 | 0.10947397  | -           |
| TNFAIP8L3 | 388121   | 2292 | 0.089173721 | 0.388887757 | 0.184367157 | 0.529918489 |
| KRT18P55  | 284085   | 1950 | 0.10481342  | 0.68563903  | 0.216702319 | 0.31142902  |
| HAAO      | 23498    | 1301 | 0.157099284 | -           | -           | -           |
| HPSE2     | 60495    | 4419 | 0.046251679 | -           | -           | -           |
| LOC728622 | 728622   | 1882 | 0.108600514 | 0.236804128 | 0.224532159 | 0.107560501 |
| MYH2      | 4620     | 6163 | 0.033163422 | 0.036156528 | -           | -           |
| LOC645433 | 645431   | 2026 | 0.100881623 | 0.219973035 | -           | -           |
| ST7-AS1   | 93653    | 1908 | 0.107120633 | 0.233577238 | 0.221472496 | -           |
| ADARB2    | 105      | 8426 | 0.024256607 | 0.026445844 | -           | 0.024024313 |
| JAM2      | 58494    | 1721 | 0.118760121 | -           | 0.1227686   | -           |
| ANKFN1    | 162282   | 2426 | 0.084248214 | -           | -           | 0.083441411 |
| COL17A1   | 1308     | 5610 | 0.036432472 | 0.238323727 | -           | 0.144334305 |
| TM4SF19   | 116211   | 1077 | 0.189773601 | 0.206901286 | 0.39235796  | 0.939781165 |
| PRSS36    | 146547   | 2853 | 0.071639035 | 0.624837532 | 0.296228197 | 2.767166371 |
| LOC100505 | 1.01E+08 | 919  | 0.222400618 | -           | -           | -           |
| APOC1P1   | 342      | 939  | 0.217663651 | -           | -           | -           |
| GPX7      | 2882     | 1246 | 0.164033843 | -           | 0.339140869 | -           |
| STYK1     | 55359    | 3022 | 0.067632749 | -           | 0.06991554  | 0.066985064 |
| HOXB4     | 3214     | 2042 | 0.100091169 | -           | -           | -           |
| HOXB7     | 3217     | 1377 | 0.14842859  | -           | -           | -           |
| SLC6A13   | 6540     | 2224 | 0.091900255 | -           | 0.095002141 | 0.182040344 |
| GPCRLTM7  | 1E+08    | 2073 | 0.098594389 | -           | 0.10192222  | -           |
| LHFPL4    | 375323   | 4895 | 0.041754069 | -           | 0.043163383 | 0.124062633 |
| VWA3B     | 200403   | 4765 | 0.042893215 | -           | -           | -           |
| BEAN1     | 146227   | 3315 | 0.061654953 | 0.134439025 | 0.063735976 | 0.061064514 |
| CACNA2D2  | 9254     | 5358 | 0.038145981 | -           | -           | -           |
| KIAA1598  | 57698    | 3950 | 0.051743334 | -           | -           | -           |
| MC2R      | 4158     | 3652 | 0.055965544 | 0.183049851 | 0.347127209 | 0.16628877  |
| DLG3      | 1741     | 6032 | 0.033883649 | -           | -           | -           |
| BOK       | 666      | 2617 | 0.078099415 | 0.170296282 | 0.080735484 | 0.077351495 |
| LOC340508 | 340508   | 2311 | 0.088440575 | -           | 0.091425686 | -           |
| XAGE1D    | 9503     | 745  | 0.27434385  | -           | -           | -           |

|           |          |      |             |             |             |             |   |
|-----------|----------|------|-------------|-------------|-------------|-------------|---|
| TMEM61    | 199964   | 1122 | 0.18216236  | -           | -           | -           | - |
| RAX2      | 84839    | 2190 | 0.093327017 | 0.101750084 | 0.19295412  | 0.092433271 |   |
| TOMM20L   | 387990   | 610  | 0.335059292 | 0.365299483 | 0.692736922 | -           |   |
| HIGD1B    | 51751    | 654  | 0.312517077 | -           | 0.323065384 | -           |   |
| RNASE13   | 440163   | 1607 | 0.127184921 | -           | -           | -           |   |
| FLJ26850  | 400710   | 1451 | 0.140858834 | -           | -           | -           |   |
| SLC26A8   | 116369   | 3434 | 0.059518395 | 0.194670371 | 0.184581911 | 0.471587334 |   |
| HIST1H2BJ | 8970     | 481  | 0.424919268 | 0.463269615 | -           | 2.104250135 |   |
| TMEM27    | 57393    | 1588 | 0.128706655 | 0.280645699 | -           | -           |   |
| CNTFR     | 1271     | 2070 | 0.098737279 | -           | 0.102069933 | -           |   |
| GAMT      | 2593     | 960  | 0.212902258 | -           | -           | -           |   |
| LOC10050  | 1.01E+08 | 943  | 0.216740369 | -           | 0.224055951 | 0.643994262 |   |
| TLR5      | 7100     | 4277 | 0.047787273 | 0.10420046  | 0.049400225 | -           |   |
| LOC38963  | 389634   | 682  | 0.299686463 | 7.514885263 | 1.549008514 | 2.374532117 |   |
| ADAL      | 161823   | 3524 | 0.057998345 | 0.126465769 | -           | -           |   |
| C1orf180  | 439927   | 2884 | 0.07086899  | -           | -           | -           |   |
| C21orf128 | 150147   | 2141 | 0.095462946 | -           | -           | -           |   |
| KIAA1045  | 23349    | 5950 | 0.034350616 | -           | 0.035510044 | 0.034021658 |   |
| NRXN3     | 9369     | 6163 | 0.033163422 | -           | -           | -           |   |
| LEP       | 3952     | 3444 | 0.059345577 | 0.194105126 | -           | 0.117554508 |   |
| GSG1L     | 146395   | 4922 | 0.041525024 | -           | -           | -           |   |
| SLC8A1    | 6546     | 6053 | -           | 0.073627188 | -           | 0.234099131 |   |
| TMEM86A   | 144110   | 3607 | -           | -           | -           | 0.168363346 |   |
| CD5       | 921      | 3180 | -           | 0.070073171 | 0.132883498 | -           |   |
| FUT3      | 2525     | 2607 | -           | 0.085474754 | 0.162090342 | 0.077648202 |   |
| MLPH      | 79083    | 3771 | -           | -           | -           | 0.05368042  |   |
| HIST1H3A  | 8350     | 469  | -           | 0.475122995 | -           | -           |   |
| WFDC1     | 58189    | 1396 | -           | -           | 0.302700231 | -           |   |
| ACCN4     | 55515    | 2914 | -           | 0.076469693 | -           | -           |   |
| ZAR1L     | 646799   | 1103 | -           | 0.202024193 | -           | -           |   |
| LDHC      | 3948     | 1318 | -           | 0.169068805 | -           | -           |   |
| EVX1      | 2128     | 1858 | -           | 0.119931477 | -           | 0.217899745 |   |
| PCDHB19P  | 84054    | 4632 | -           | 0.096214458 | -           | 0.087404518 |   |
| LGALS9B   | 284194   | 1243 | -           | 2.509780842 | -           | 2.442826182 |   |
| UQCRBP1   | 442454   | 797  | -           | 0.838767948 | -           | -           |   |
| LOC72881  | 728819   | 1170 | -           | -           | 0.361170532 | 0.173016122 |   |
| GRAMD2    | 196996   | 3318 | -           | 0.067158736 | -           | -           |   |
| ARHGEF3   | 50650    | 4065 | -           | 0.438539109 | 0.051976571 | 1.44414195  |   |
| FOXR1     | 283150   | 1215 | -           | 0.183401387 | -           | -           |   |
| APCDD1L   | 164284   | 3112 | -           | 0.071604333 | 0.135787122 | 0.13009567  |   |
| FLJ35776  | 649446   | 1023 | -           | 1.306936567 | 0.206534469 | 2.77028747  |   |
| CNTNAP5   | 129684   | 5284 | -           | 0.042171212 | -           | -           |   |
| ANKRD26P  | 124149   | 6140 | -           | 0.036291968 | -           | -           |   |
| PTGDR     | 5729     | 2966 | -           | -           | -           | 0.341248926 |   |
| NBEAP1    | 606      | 548  | -           | -           | -           | 0.369395735 |   |
| CDRT4     | 284040   | 2515 | -           | -           | 0.084009845 | 0.160977227 |   |
| SELENBP1  | 8991     | 1721 | -           | -           | 0.1227686   | -           |   |
| SCT       | 6343     | 514  | -           | -           | -           | 0.787660945 |   |
| NBPF22P   | 285622   | 2633 | -           | 0.08463072  | -           | -           |   |
| HOXA6     | 3203     | 802  | -           | -           | 0.263447333 | 0.504810132 |   |
| UNC5A     | 90249    | 3749 | -           | 0.416065296 | 0.056357632 | 0.269977145 |   |
| LINC00163 | 727699   | 2155 | -           | -           | -           | 0.093934507 |   |
| WNT9A     | 7483     | 1240 | -           | -           | 0.170390937 | -           |   |
| CA6       | 765      | 1339 | -           | 0.332834481 | -           | 0.151179136 |   |
| CX3CL1    | 6376     | 3304 | -           | -           | -           | 0.061267816 |   |
| LINC00282 | 283521   | 4126 | -           | -           | 0.102416268 | -           |   |
| FLJ43826  | 342666   | 3580 | -           | 0.248975067 | 0.05901809  | 0.226177501 |   |
| ACSS3     | 79611    | 3033 | -           | 0.514285787 | 0.208985916 | 0.133484249 |   |
| SEMA3C    | 10512    | 5189 | -           | -           | -           | 0.039011151 |   |
| TEX101    | 83639    | 1600 | -           | 0.139270428 | -           | 0.379554118 |   |
| ZNF300P1  | 134466   | 2420 | -           | -           | -           | 0.08364829  |   |
| SCGN      | 10590    | 1492 | -           | -           | -           | 0.135676182 |   |

|           |        |       |   |             |             |             |
|-----------|--------|-------|---|-------------|-------------|-------------|
| LOC284379 | 284379 | 1248  | - | 1.071310984 | 1.185090809 | 0.486607844 |
| APBB1     | 322    | 2653  | - | 0.251978158 | 0.07963994  | -           |
| LOC644936 | 644936 | 1456  | - | 0.306088853 | 0.14511316  | 0.417092437 |
| GRM4      | 2914   | 3884  | - | 0.057371958 | -           | 0.364830597 |
| NEUROD2   | 4761   | 3048  | - | 0.073107836 | -           | 0.066413669 |
| PPP3R2    | 5535   | 3401  | - | 0.065519754 | -           | -           |
| CABP1     | 9478   | 1201  | - | 0.185539288 | -           | -           |
| CRHBP     | 1393   | 1854  | - | 0.360570687 | 0.683769454 | 1.419404109 |
| C21orf7   | 56911  | 1997  | - | -           | -           | 0.202732962 |
| ABLIM2    | 84448  | 2595  | - | -           | 0.081419947 | -           |
| SPAG6     | 9576   | 2630  | - | -           | -           | 0.615753195 |
| AANAT     | 15     | 1935  | - | 0.345477031 | -           | 0.418457598 |
| FLJ26484  | 400619 | 2265  | - | 0.196761753 | 0.093282455 | 0.089372566 |
| ZNF615    | 284370 | 4110  | - | 0.054217198 | -           | -           |
| ARRDC5    | 645432 | 1638  | - | -           | -           | 0.123582944 |
| NEURL3    | 93082  | 1704  | - | -           | -           | 0.118796281 |
| CYP4F12   | 66002  | 1783  | - | 1.124786406 | -           | 2.497720126 |
| LINC00114 | 400866 | 890   | - | 0.500747606 | -           | 0.227448161 |
| C7        | 730    | 4034  | - | 0.055238643 | 0.104751989 | 0.05018068  |
| C17orf72  | 92340  | 3121  | - | -           | 0.135395554 | -           |
| SP9       | 1E+08  | 1455  | - | -           | 0.290425789 | -           |
| SYN2      | 6854   | 3887  | - | -           | -           | 0.468705883 |
| ANKRD30B  | 374860 | 4617  | - | -           | -           | 0.043844241 |
| POU3F2    | 5454   | 4172  | - | -           | 0.151930557 | -           |
| SHOX      | 6473   | 1951  | - | 1.713219001 | 1.624434352 | -           |
| CLDN23    | 137075 | 1972  | - | 0.112998319 | 0.107142374 | 0.205303106 |
| PDCD1LG2  | 80380  | 2418  | - | -           | -           | 3.348699139 |
| WDR87     | 83889  | 8947  | - | -           | 0.023615152 | 0.022625334 |
| C20orf160 | 140706 | 2532  | - | -           | -           | 0.079948208 |
| RUNDC3B   | 154661 | 4101  | - | 0.054336183 | 0.103040605 | 0.049360854 |
| GPR115    | 221393 | 3180  | - | -           | -           | 0.063656875 |
| NUDT16    | 131870 | 6204  | - | -           | 0.034056216 | -           |
| PRR15L    | 79170  | 1401  | - | 0.477157783 | -           | 0.144488839 |
| FREM2     | 341640 | 16179 | - | 0.082637747 | 0.026118396 | 0.025023656 |
| SSTR4     | 6754   | 1258  | - | -           | -           | 0.160913246 |
| LOC116437 | 116437 | 2505  | - | 0.177910327 | -           | -           |
| KIR3DL1   | 3811   | 1986  | - | -           | 0.10638709  | -           |
| DEFA6     | 1671   | 479   | - | 1.395611804 | -           | 1.690428918 |
| PLGLB2    | 5342   | 3016  | - | 0.073883516 | -           | 0.134236647 |
| SMPX      | 23676  | 886   | - | -           | -           | 0.228475015 |
| LYVE1     | 10894  | 2518  | - | 0.088495903 | -           | -           |
| SPOCD1    | 90853  | 3888  | - | 0.057312933 | 0.054342788 | 0.364455257 |
| LINC00239 | 145200 | 662   | - | -           | 0.638322542 | 1.223135124 |
| LOC645638 | 645638 | 621   | - | -           | 0.34023311  | -           |
| CSRP2     | 1466   | 901   | - | -           | -           | 0.674013972 |
| LRRC16B   | 90668  | 4615  | - | 0.048284439 | -           | -           |
| LOC220980 | 220980 | 3300  | - | 0.067525056 | -           | -           |
| C14orf34  | 645687 | 2092  | - | 0.10651658  | 0.10099654  | 0.096763319 |
| RIMBP3C   | 150221 | 5802  | - | -           | 0.03641585  | -           |
| CCL4      | 6351   | 667   | - | 12.69511547 | 4.751531365 | 69.80305619 |
| OR1L8     | 138881 | 930   | - | -           | 0.227187915 | -           |
| CYP2C9    | 1559   | 1876  | - | -           | 0.112625139 | -           |
| GJB7      | 375519 | 2298  | - | -           | 0.09194289  | -           |
| TRIM74    | 378108 | 1351  | - | -           | -           | 0.299672632 |
| FBXO39    | 162517 | 1673  | - | -           | -           | 4.234913451 |
| LOC390705 | 390705 | 445   | - | -           | 0.474797217 | -           |
| MUC12     | 10071  | 16321 | - | -           | -           | 0.012402969 |
| LRP1B     | 53353  | 16557 | - | 0.013458518 | -           | -           |
| ACOT4     | 122970 | 1703  | - | 0.130847143 | -           | -           |
| CDKL2     | 8999   | 4717  | - | -           | 0.04479219  | -           |
| OPRK1     | 4986   | 4959  | - | 0.044935004 | 0.213031621 | -           |
| FAM71F2   | 346653 | 1333  | - | 0.501498915 | 0.634012787 | 3.340911467 |

|           |          |       |   |             |             |             |
|-----------|----------|-------|---|-------------|-------------|-------------|
| C7orf46   | 340277   | 1489  | - | -           | -           | 0.135949539 |
| FRMD7     | 90167    | 3227  | - | -           | -           | 0.125459475 |
| BTG3      | 10950    | 1596  | - | 0.139619477 | 0.264767871 | 0.380505381 |
| LILRA4    | 23547    | 1725  | - | 0.129178368 | -           | 0.234700131 |
| PPP1R14D  | 54866    | 880   | - | 0.25321896  | 0.24009632  | -           |
| NRCAM     | 4897     | 6406  | - | -           | 0.065964646 | -           |
| YPEL3     | 83719    | 1588  | - | -           | 0.133050857 | -           |
| RBP5      | 83758    | 968   | - | 2.07179149  | 0.873077526 | 1.254724357 |
| ZNF827    | 152485   | 4197  | - | 0.053093325 | -           | -           |
| IL5       | 3567     | 816   | - | -           | -           | 0.248074587 |
| PCDHGA8   | 9708     | 5503  | - | 0.080985893 | -           | 0.110355549 |
| FLJ21408  | 400512   | 631   | - | 0.706284262 | -           | -           |
| CNTN4     | 152330   | 5223  | - | 0.127991203 | 0.161811037 | 0.038757201 |
| RBM20     | 282996   | 7233  | - | -           | 0.058422442 | 0.027986847 |
| DNAH2     | 146754   | 13505 | - | -           | -           | 0.014989179 |
| SLC35G5   | 83650    | 1201  | - | -           | 0.175924031 | 0.168550261 |
| CLDN3     | 1365     | 1318  | - | -           | -           | 0.307175816 |
| LOC28463  | 284632   | 1863  | - | -           | -           | 0.108657468 |
| GRIN2C    | 2905     | 4298  | - | 0.103691338 | 0.098317711 | 0.094196772 |
| FGFR2     | 2263     | 3011  | - | 0.444037233 | 0.210512881 | 0.336148892 |
| KLHDC9    | 126823   | 1348  | - | 0.165306146 | -           | -           |
| ZNF556    | 80032    | 1632  | - | -           | -           | 0.248074587 |
| C1orf70   | 339453   | 1128  | - | 0.197546706 | -           | -           |
| TNNT3     | 7140     | 1217  | - | -           | -           | 1.330674531 |
| ZNF540    | 163255   | 3157  | - | 0.070583682 | -           | 0.064120641 |
| CCL25     | 6370     | 1002  | - | 0.667163727 | 0.632589106 | 0.60607444  |
| ADAMTS8   | 11095    | 3679  | - | -           | -           | 0.055022795 |
| HCAR2     | 338442   | 2082  | - | 0.32108456  | 0.202963267 | 9.722808019 |
| PKDCC     | 91461    | 2517  | - | -           | 0.167886183 | -           |
| MMP8      | 4317     | 3056  | - | 23.26034896 | 0.138275367 | 6.557741306 |
| HSPB7     | 27129    | 2908  | - | 0.076627471 | -           | -           |
| PLIN1     | 5346     | 2979  | - | -           | 0.070924727 | -           |
| EDIL3     | 10085    | 2974  | - | 0.149853857 | -           | 0.952926725 |
| C20orf123 | 128506   | 2043  | - | -           | -           | 0.198168246 |
| YAP1      | 10413    | 5396  | - | 0.082591803 | -           | 0.07502923  |
| KCNH6     | 81033    | 3017  | - | -           | 0.070031409 | -           |
| CHST1     | 8534     | 2735  | - | -           | -           | 0.074014209 |
| C11orf16  | 56673    | 1942  | - | 0.114743916 | -           | -           |
| BPI       | 671      | 1901  | - | 54.74111719 | -           | 50.7935653  |
| APOA2     | 336      | 473   | - | 0.471105042 | -           | -           |
| HSPB2     | 3316     | 858   | - | -           | -           | 0.235931076 |
| DYX1C1    | 161582   | 1807  | - | 0.616581861 | -           | -           |
| SCN4B     | 6330     | 4579  | - | 0.24332025  | -           | 0.353664753 |
| GPRIN1    | 114787   | 4208  | - | 0.052954535 | 0.251051285 | 0.144317155 |
| CRTAC1    | 55118    | 2730  | - | -           | 0.077393685 | -           |
| PYDC1     | 260434   | 582   | - | -           | 0.363032236 | -           |
| CLIC3     | 9022     | 813   | - | 10.14121689 | -           | 64.48840776 |
| RNF112    | 7732     | 3252  | - | 0.068521736 | -           | 0.186742494 |
| ASB4      | 51666    | 3824  | - | -           | -           | 0.052936418 |
| CDH23     | 64072    | 11134 | - | 1.841261631 | 0.265671516 | 4.199844381 |
| FAM167A   | 83648    | 4093  | - | 0.816635786 | -           | 0.494573328 |
| SOX15     | 6665     | 1394  | - | 0.319702561 | 0.151567261 | 0.435643177 |
| ARHGAP39  | 80728    | 5147  | - | 0.043293702 | 0.04105008  | -           |
| TBR1      | 10716    | 3186  | - | 0.069941207 | -           | -           |
| OR56B4    | 196335   | 960   | - | -           | -           | 0.210863399 |
| RAB25     | 57111    | 1101  | - | -           | 0.383805198 | -           |
| LOC10050  | 1.01E+08 | 4300  | - | 0.310929328 | 0.049135991 | 2.212594549 |
| GJC2      | 57165    | 2411  | - | -           | 0.087633663 | -           |
| KLK4      | 9622     | 1347  | - | -           | -           | 0.150281264 |
| C14orf165 | 414767   | 930   | - | -           | -           | 0.652996332 |
| PMF1-BGL  | 1.01E+08 | 794   | - | -           | 0.266101715 | -           |
| ATP5J2-PT | 1.01E+08 | 5538  | - | -           | 0.152607267 | -           |

|           |          |      |   |             |             |             |
|-----------|----------|------|---|-------------|-------------|-------------|
| NXPH4     | 11247    | 1821 | - | -           | 0.116026777 | -           |
| LOC10050  | 1.01E+08 | 616  | - | 0.361741371 | -           | -           |
| RPL3L     | 6123     | 1547 | - | -           | 0.546308368 | -           |
| C6orf126  | 389383   | 422  | - | -           | -           | 0.479689249 |
| PLA2G12B  | 84647    | 1092 | - | -           | -           | 0.370748833 |
| PABPN1L   | 390748   | 1309 | - | -           | -           | 0.154643898 |
| GJB5      | 2709     | 1299 | - | -           | 0.162651856 | -           |
| BSPRY     | 54836    | 2354 | - | 0.094661293 | -           | -           |
| OAZ3      | 51686    | 901  | - | 0.247317075 | 0.23450029  | -           |
| RGPD8     | 727851   | 7299 | - | -           | 0.028947083 | -           |
| FCER2     | 2208     | 1624 | - | -           | -           | 0.124648315 |
| PCDHB12   | 56124    | 3422 | - | -           | -           | 0.059155132 |
| PACRG     | 135138   | 1702 | - | 0.130924022 | -           | -           |
| SLC22A18A | 5003     | 1565 | - | 0.427155306 | 0.135006237 | 0.129347516 |
| LOC64690  | 646903   | 1964 | - | -           | -           | 0.103069686 |
| ZFR2      | 23217    | 4757 | - | -           | 0.133246644 | 0.297877242 |
| DDR1      | 780      | 3877 | - | -           | -           | 0.104425516 |
| EPN3      | 55040    | 3944 | - | 0.056499159 | -           | -           |
| LINC00336 | 401253   | 2107 | - | -           | -           | 0.096074448 |
| LOC100130 | 1E+08    | 3024 | - | -           | 0.069869299 | -           |
| RASGEF1C  | 255426   | 2216 | - | -           | 0.095345109 | -           |
| ENTPD3    | 956      | 2807 | - | -           | 0.075270667 | -           |
| CES5A     | 221223   | 2285 | - | -           | 0.092465979 | -           |
| CHN2      | 1124     | 3447 | - | -           | 0.12259052  | -           |
| GADD45G   | 10912    | 1087 | - | -           | -           | 0.37245421  |
| ITGA1     | 3672     | 4811 | - | 0.046317332 | -           | 0.25245753  |
| FBLN5     | 10516    | 2637 | - | -           | 0.160246311 | -           |
| APOBEC3H  | 164668   | 1164 | - | 0.191437014 | -           | 6.434594441 |
| ATP5EP2   | 432369   | 368  | - | -           | 0.574143373 | -           |
| GRIK2     | 2898     | 4724 | - | 0.04717034  | -           | 0.042851156 |
| TAL1      | 6886     | 5018 | - | -           | 0.042105373 | 0.040340547 |
| SYTL4     | 94121    | 3936 | - | -           | 0.053680071 | -           |
| C8G       | 733      | 888  | - | 0.250937708 | 0.23793329  | 1.139802156 |
| CP        | 1356     | 4674 | - | 1.096523695 | 0.135612812 | 13.16610491 |
| LOC10049  | 1E+08    | 2316 | - | 0.096214458 | -           | 0.174809035 |
| C1orf177  | 163747   | 1806 | - | 0.123384654 | 0.116990455 | -           |
| CRAT      | 1384     | 2865 | - | -           | 0.073746863 | 0.070655799 |
| OXER1     | 165140   | 1819 | - | -           | 0.232308699 | 0.111285796 |
| P2RY13    | 53829    | 2769 | - | 12.07110968 | 0.076303634 | 15.571451   |
| EXOC3L1   | 283849   | 2505 | - | -           | -           | 1.292958805 |
| FRMD1     | 79981    | 3028 | - | -           | 0.069777002 | -           |
| SAGE1     | 55511    | 3069 | - | -           | -           | 0.065959225 |
| HAS1      | 3036     | 2116 | - | 0.315925356 | -           | 0.6696607   |
| SELP      | 6403     | 3185 | - | 8.18569046  | -           | 5.084555427 |
| ITIH2     | 3698     | 3198 | - | -           | 0.132135561 | 0.063298581 |
| ZP1       | 22917    | 1972 | - | -           | 0.321427122 | 0.615909319 |
| NUPR1     | 26471    | 938  | - | -           | -           | 1.079045112 |
| PCDHGA10  | 56106    | 4617 | - | 0.048263523 | -           | 0.087688483 |
| GPR22     | 2845     | 2976 | - | -           | -           | 0.068020451 |
| C1orf141  | 400757   | 2143 | - | 0.103981654 | 0.295778947 | 0.188921011 |
| ZFP3      | 124961   | 5011 | - | 0.044468706 | -           | 0.363572095 |
| LHX9      | 56956    | 2515 | - | -           | 0.084009845 | -           |
| ARHGAP40  | 343578   | 2838 | - | -           | -           | 0.071328    |
| GDPD2     | 54857    | 2290 | - | -           | 0.092264088 | -           |
| CTCFL     | 140690   | 3493 | - | -           | 0.060488051 | -           |
| SLC4A1    | 6521     | 4953 | - | 0.134968313 | 0.042657937 | 0.326959601 |
| CHRNA1    | 1146     | 2187 | - | 0.101889659 | -           | 0.092560065 |
| CSRP3     | 8048     | 1341 | - | 0.166169042 | -           | -           |
| DDX25     | 29118    | 1839 | - | -           | -           | 0.11007551  |
| BTN1A1    | 696      | 2859 | - | -           | -           | 0.141608159 |
| RAB3IL1   | 5866     | 2305 | - | -           | 0.091663671 | -           |
| HEATR8    | 374977   | 4404 | - | -           | 0.04797565  | 0.137894321 |

|           |          |       |   |             |             |             |
|-----------|----------|-------|---|-------------|-------------|-------------|
| KIF4B     | 285643   | 4426  | - | -           | -           | 0.0914726   |
| LOC729668 | 729668   | 1567  | - | -           | -           | 0.129182427 |
| CEND1     | 51286    | 1646  | - | -           | -           | 0.368946895 |
| ST14      | 6768     | 3319  | - | 0.201415503 | -           | 1.524772996 |
| LOC644241 | 644242   | 1610  | - | -           | -           | 0.125732213 |
| PRKG2     | 5593     | 3328  | - | -           | -           | 0.121651961 |
| NAT8      | 9027     | 1073  | - | 0.207672586 | -           | 2.075225995 |
| HIST1H2BC | 8348     | 467   | - | -           | 0.452429896 | 0.433466516 |
| CNTF      | 1270     | 1914  | - | -           | 0.110389113 | -           |
| TRIM73    | 375593   | 1351  | - | 0.164939071 | -           | -           |
| TG        | 7038     | 8453  | - | 0.026361373 | 0.02499524  | 0.239475764 |
| GPX2      | 2877     | 1024  | - | 0.217610044 | -           | 0.593053309 |
| C22orf15  | 150248   | 879   | - | 0.253507036 | -           | 0.460588994 |
| NOX1      | 27035    | 2529  | - | 0.088110986 | 0.16708957  | 0.160086092 |
| TAL2      | 6887     | 656   | - | 0.679367941 | -           | -           |
| S1PR5     | 53637    | 2467  | - | -           | 0.085644411 | -           |
| AATK-AS1  | 388428   | 1577  | - | -           | 0.133978923 | -           |
| LRRN2     | 10446    | 3227  | - | -           | 0.065474051 | 0.062729738 |
| GOLGA6L1  | 283767   | 3822  | - | -           | 0.055281204 | -           |
| CYP19A1   | 1588     | 4531  | - | 0.147538745 | 0.093261868 | 2.54655599  |
| ZNF831    | 128611   | 9404  | - | 0.118477608 | 0.044935083 | 0.129154953 |
| MAST4     | 375449   | 10724 | - | -           | -           | 0.037752492 |
| TNNC2     | 7125     | 698   | - | -           | -           | 0.290012698 |
| GLIPR1L1  | 256710   | 975   | - | 0.228546343 | 0.216702319 | -           |
| PCDHGA9   | 56107    | 4605  | - | 0.096778582 | -           | 0.087916987 |
| C9orf71   | 169693   | 1284  | - | -           | -           | 0.945929266 |
| ZFHX4     | 79776    | 13975 | - | -           | 0.015118766 | 0.014485071 |
| C1orf100  | 200159   | 579   | - | 0.384857832 | -           | -           |
| C9orf128  | 392307   | 2979  | - | 0.07480117  | -           | -           |
| GRAPL     | 400581   | 967   | - | 0.691311328 | 0.436990199 | 0.62801095  |
| DAAM2     | 23500    | 6252  | - | 2.174151275 | -           | 1.100860739 |
| SERPINB6  | 5269     | 2067  | - | -           | -           | 0.195867308 |
| CCDC164   | 92749    | 2515  | - | 0.088601465 | 0.084009845 | 0.241465841 |
| RHOB      | 388      | 2384  | - | -           | -           | 0.084911436 |
| HIST1H4K  | 8362     | 354   | - | -           | -           | 0.571832946 |
| HIST1H2BE | 3018     | 431   | - | 0.51701319  | -           | -           |
| VNN3      | 55350    | 1780  | - | -           | -           | 0.11372408  |
| FLJ39582  | 439931   | 1301  | - | -           | -           | 0.155594822 |
| CCR7      | 1236     | 2207  | - | 0.100966327 | 0.09573392  | 0.091721279 |
| LOC643037 | 643037   | 604   | - | 0.737856572 | -           | 0.335147124 |
| LTF       | 4057     | 2593  | - | -           | -           | 0.156134873 |
| TRIM34    | 53840    | 2330  | - | 0.191272691 | -           | -           |
| C11orf42  | 160298   | 1149  | - | -           | -           | 0.176178297 |
| CREB3L3   | 84699    | 2586  | - | -           | -           | 0.39139378  |
| MAB21L1   | 4081     | 2907  | - | -           | -           | 0.069634972 |
| RSPH10B   | 222967   | 3122  | - | -           | 0.067676093 | 0.129678964 |
| SLC26A5   | 375611   | 2518  | - | 0.176991807 | -           | 0.160785435 |
| ARHGAP19  | 1.01E+08 | 1916  | - | 0.116300984 | -           | -           |
| SPTBN4    | 57731    | 8705  | - | -           | 0.024271656 | 0.023254321 |
| LOC440910 | 440910   | 1739  | - | -           | 0.12149785  | -           |
| KCNQ1     | 3784     | 3262  | - | -           | -           | 0.062056672 |
| WNT2B     | 7482     | 2515  | - | -           | 0.336039382 | 0.241465841 |
| ZBP1      | 81030    | 2327  | - | 0.095759641 | 0.090797061 | 4.784524049 |
| FSTL4     | 23105    | 5382  | - | -           | 0.039257667 | -           |
| PPAPDC3   | 84814    | 2095  | - | -           | 0.100851915 | -           |
| NALCN     | 259232   | 6923  | - | -           | -           | 0.02924005  |
| C1QL4     | 338761   | 2065  | - | -           | -           | 0.098028505 |
| SORCS2    | 57537    | 6061  | - | 0.11029501  | 0.069719439 | 0.567776055 |
| PTTG2     | 10744    | 576   | - | -           | -           | 0.351438998 |
| LOC442028 | 442028   | 3330  | - | 0.133833444 | 0.126897755 | -           |
| MYL4      | 4635     | 934   | - | -           | -           | 0.216733258 |
| FBXO2     | 26232    | 1724  | - | 0.258506595 | -           | 0.117418134 |

|           |          |       |   |             |             |             |
|-----------|----------|-------|---|-------------|-------------|-------------|
| KRT86     | 3892     | 2091  | - | -           | 0.202089681 | 0.096809595 |
| DOK6      | 220164   | 8897  | - | 0.050091645 | -           | -           |
| TUSC3     | 7991     | 3888  | - | 0.057312933 | -           | -           |
| LOC28535  | 285359   | 983   | - | 0.453372705 | 0.21493872  | 0.823718669 |
| BFSP2     | 8419     | 1644  | - | -           | 0.128518711 | -           |
| RTP1      | 132112   | 2265  | - | -           | 0.093282455 | -           |
| RGMB      | 285704   | 4601  | - | -           | -           | 0.08799342  |
| HLA-F-AS1 | 285830   | 1914  | - | 0.11642251  | 0.110389113 | 0.105762206 |
| EPB41L4B  | 54566    | 3783  | - | 0.058903697 | 0.055851113 | -           |
| SGMS2     | 166929   | 6246  | - | 0.035676062 | 0.033827211 | -           |
| TIAF1     | 9220     | 2110  | - | -           | 0.400539832 | 0.191875699 |
| VTRNA1-2  | 56663    | 88    | - | 2.532189599 | -           | -           |
| MUC21     | 394263   | 3656  | - | -           | 0.057791237 | -           |
| NTNG1     | 22854    | 3434  | - | -           | 0.123054608 | -           |
| SDK2      | 54549    | 10796 | - | -           | -           | 0.018750358 |
| C11orf86  | 254439   | 1185  | - | -           | -           | 0.170826045 |
| CDK5R2    | 8941     | 2495  | - | 0.089311697 | -           | -           |
| SHH       | 6469     | 1576  | - | 0.424173892 | 0.26812787  | 0.12844471  |
| ST20-MTH  | 1.01E+08 | 2282  | - | -           | -           | 0.088706776 |
| ENTPD2    | 954      | 2100  | - | -           | 0.100611791 | 0.385578787 |
| NME5      | 8382     | 1243  | - | -           | 0.339959391 | -           |
| SCN9A     | 6335     | 9771  | - | 0.022805515 | -           | -           |
| FAM83F    | 113828   | 2134  | - | 0.10442019  | -           | -           |
| SCNN1G    | 6340     | 3516  | - | -           | 0.060092367 | -           |
| PXDNL     | 137902   | 4812  | - | 0.13892312  | -           | 0.126202533 |
| HIC1      | 3090     | 3174  | - | 20.28942845 | 0.066567348 | 25.06444333 |
| GABBR1    | 2550     | 4547  | - | -           | -           | 0.044519213 |
| WTH3DI    | 150786   | 3672  | - | -           | 0.057539423 | -           |
| HGC6.3    | 1E+08    | 1016  | - | 0.438647017 | -           | -           |
| PDLIM1    | 9124     | 1462  | - | -           | 0.144517621 | 0.138460235 |
| HLA-DPB2  | 3116     | 805   | - | 0.553621577 | -           | -           |
| NEUROD4   | 58158    | 3971  | - | -           | -           | 0.101953595 |
| FAM47E    | 1E+08    | 1564  | - | -           | -           | 0.129430219 |
| PRKCDBP   | 112464   | 1039  | - | -           | 0.203353957 | -           |
| B3GALT2   | 8707     | 3548  | - | 0.125610307 | -           | -           |
| MYL9      | 10398    | 1212  | - | -           | 0.174327361 | -           |
| RPL36A-HN | 1.01E+08 | 2536  | - | -           | -           | 0.079822107 |
| TDRD12    | 91646    | 1617  | - | 0.137806237 | 0.130664664 | -           |
| OTUD7A    | 161725   | 3042  | - | -           | 0.138911743 | 0.199633987 |
| CELA2B    | 51032    | 941   | - | -           | -           | 0.215121002 |
| QRFP      | 347148   | 411   | - | -           | 0.514074845 | -           |
| C15orf56  | 644809   | 2125  | - | 0.20972488  | -           | 0.190521283 |
| HCK       | 3055     | 2234  | - | -           | -           | 0.181225482 |
| CNFN      | 84518    | 543   | - | 0.820746537 | -           | 0.372797169 |
| CXorf22   | 170063   | 3667  | - | 0.060767026 | -           | -           |
| PDZD4     | 57595    | 3745  | - | -           | 0.056417827 | -           |
| ARPC4-TTL | 1.01E+08 | 3987  | - | 0.055889813 | -           | 0.050772225 |
| ARSJ      | 79642    | 4689  | - | -           | -           | 0.043171009 |
| RAP1GAP   | 5909     | 3495  | - | 0.063757564 | 0.18136031  | 0.11583912  |
| KCNK17    | 89822    | 1741  | - | 0.127991203 | -           | -           |
| LINC00488 | 677779   | 2524  | - | 0.176571066 | 0.083710286 | 0.160403219 |
| MEGF10    | 84466    | 7689  | - | 0.086942132 | -           | -           |
| STARD13   | 90627    | 5929  | - | -           | 0.035635817 | 0.034142159 |
| DNAH9     | 1770     | 13750 | - | -           | 0.015366164 | -           |
| PCDHGA7   | 56108    | 4605  | - | 0.048389291 | -           | 0.087916987 |
| C5orf20   | 140947   | 3144  | - | -           | -           | 0.064385771 |
| LOC10014  | 1E+08    | 628   | - | 1.064487347 | 1.345762811 | -           |
| PDC       | 5132     | 1258  | - | 0.1771325   | -           | -           |
| SPSB4     | 92369    | 2455  | - | -           | 0.086063039 | -           |
| KRTCAP3   | 200634   | 956   | - | 0.466177165 | 0.442018329 | 0.423491345 |
| ZNF404    | 342908   | 1868  | - | -           | 0.113107474 | -           |
| MMP1      | 4312     | 2081  | - | -           | 0.1015304   | -           |



|           |          |       |   |             |             |             |
|-----------|----------|-------|---|-------------|-------------|-------------|
| WEE2      | 494551   | 3061  | - | 0.145594698 | -           | 0.132263223 |
| GRM1      | 2911     | 6939  | - | -           | -           | 0.029172628 |
| CSRNP3    | 80034    | 11788 | - | -           | 0.017923716 | -           |
| CLUL1     | 27098    | 1951  | - | 0.1142146   | -           | 0.103756465 |
| PRAP1     | 118471   | 807   | - | 1.104499057 | 0.78544521  | 0.752523654 |
| AATK      | 9625     | 5327  | - | -           | 0.198314963 | -           |
| HRASLS2   | 54979    | 785   | - | -           | -           | 9.799104194 |
| PTK2      | 5747     | 4550  | - | 0.048974216 | -           | -           |
| GLTPD2    | 388323   | 1239  | - | -           | 0.341056919 | 0.490142525 |
| TMPRSS11  | 389208   | 2077  | - | -           | -           | 0.097462139 |
| KCNH3     | 23416    | 3853  | - | -           | 0.219345716 | -           |
| TRPV3     | 162514   | 3420  | - | -           | 0.06177917  | -           |
| ALDOB     | 229      | 2426  | - | -           | 0.087091822 | 0.083441411 |
| LOC100129 | 1E+08    | 632   | - | 0.352583362 | -           | -           |
| LOC647107 | 647107   | 1533  | - | -           | 0.413473114 | 0.13204753  |
| LINGO1    | 84894    | 2932  | - | -           | -           | 0.069041222 |
| KRT4      | 3851     | 2147  | - | 0.10378793  | -           | -           |
| SOSTDC1   | 25928    | 1883  | - | 0.236678369 | 0.112206459 | -           |
| LOC100289 | 1E+08    | 640   | - | -           | -           | 0.316295098 |
| DCT       | 1638     | 2403  | - | -           | -           | 0.168480119 |
| CCR8      | 1237     | 1487  | - | -           | 0.284175873 | -           |
| KIAA0664L | 1E+08    | 1789  | - | 0.124557118 | -           | -           |
| NOTUM     | 147111   | 2281  | - | 0.097690787 | -           | -           |
| ESR2      | 2100     | 2745  | - | 0.081177663 | 0.153941538 | -           |
| SLC6A1    | 6529     | 4494  | - | -           | 0.047014856 | -           |
| LBX2      | 85474    | 1463  | - | -           | -           | 0.138365593 |
| LYPD5     | 284348   | 2518  | - | 0.088495903 | 0.083909754 | -           |
| COL5A3    | 50509    | 6192  | - | 0.071974381 | -           | 0.032692    |
| C15orf60  | 283677   | 938   | - | -           | 0.225250279 | -           |
| TAF1L     | 138474   | 6216  | - | 0.143392976 | 0.20394282  | 0.162828879 |
| MFSD6L    | 162387   | 2258  | - | -           | 0.093571639 | 0.179299259 |
| LOC100130 | 1E+08    | 496   | - | -           | 0.425977341 | 0.408122708 |
| GADL1     | 339896   | 3655  | - | -           | -           | 0.055384094 |
| HSD17B8   | 7923     | 989   | - | 0.225311107 | -           | -           |
| CHRNA6    | 8973     | 2400  | - | -           | -           | 0.08434536  |
| MUTED     | 63915    | 2565  | - | 0.086874341 | 0.082372227 | -           |
| TRPV4     | 59341    | 3250  | - | -           | -           | 0.124571608 |
| ANKRD53   | 79998    | 2120  | - | 0.105109757 | -           | 0.286455938 |
| RIPK3     | 11035    | 1940  | - | -           | -           | 2.295585044 |
| BEST2     | 54831    | 1924  | - | -           | 0.109815365 | -           |
| ZCCHC18   | 644353   | 3055  | - | 0.072940322 | 0.069160315 | -           |
| PMP2      | 5375     | 3579  | - | 0.062261158 | -           | -           |
| CCL24     | 6369     | 360   | - | 98.41776909 | 11.7380423  | 259.7837075 |
| MT1JP     | 4498     | 408   | - | 0.546158541 | -           | -           |
| CTRC      | 11330    | 917   | - | 0.486003674 | 0.460817364 | 0.441502427 |
| CD276     | 80381    | 3419  | - | -           | -           | 0.059207038 |
| ZNF670-ZN | 1.01E+08 | 1119  | - | 0.398271108 | 0.755262775 | -           |
| LOC729150 | 729156   | 2426  | - | 0.09185189  | -           | -           |
| RDH12     | 145226   | 1934  | - | -           | 0.2184951   | 0.62801095  |
| TAS2R30   | 259293   | 960   | - | 0.23211738  | 0.220088293 | 0.632590197 |
| CEACAM25  | 90273    | 1378  | - | 0.646829274 | -           | 0.440701443 |
| C15orf38  | 348110   | 2128  | - | 0.209429215 | -           | 0.190252691 |
| RFX6      | 222546   | 3517  | - | -           | -           | 0.518015288 |
| NSUN7     | 79730    | 3711  | - | -           | -           | 0.054548333 |
| RNF149    | 284996   | 2968  | - | 0.075078398 | 0.071187588 | 0.13640759  |
| CXCL5     | 6374     | 2475  | - | -           | -           | 0.08178944  |
| NAPSA     | 9476     | 1438  | - | -           | -           | 0.703855574 |
| TISP43    | 150527   | 2290  | - | -           | -           | 0.088396883 |
| OR52N1    | 79473    | 963   | - | 0.231394273 | -           | 0.420413007 |
| LOC100129 | 1E+08    | 629   | - | -           | 0.335905821 | 0.321826491 |
| LCN12     | 286256   | 694   | - | 0.32108456  | -           | 0.291684241 |
| TCTEX1D4  | 343521   | 1278  | - | 0.871802366 | 0.165324539 | 1.267160331 |

|           |          |       |   |             |             |             |
|-----------|----------|-------|---|-------------|-------------|-------------|
| VGLL3     | 389136   | 10396 | - | 0.042868927 | 0.020323659 | 0.058415409 |
| LRRC36    | 55282    | 2416  | - | 0.092232071 | -           | -           |
| CLDN6     | 9074     | 1389  | - | -           | 0.304225718 | -           |
| LINC00284 | 121838   | 2564  | - | -           | -           | 0.157900829 |
| EFHD1     | 80303    | 2000  | - | -           | 0.105642381 | 0.101214431 |
| PPAP2B    | 8613     | 3324  | - | -           | 0.063563406 | 0.121798353 |
| CNDP1     | 84735    | 2211  | - | -           | 0.095560724 | -           |
| GPR52     | 9293     | 1472  | - | 0.1513809   | -           | -           |
| TSTD1     | 1E+08    | 688   | - | -           | -           | 0.588455997 |
| C9orf173  | 441476   | 1173  | - | 0.189968188 | 0.180123411 | 0.172573626 |
| XCR1      | 2829     | 1373  | - | -           | -           | 0.147435443 |
| ZNF19     | 7567     | 2743  | - | -           | -           | 0.147596692 |
| EPHB1     | 2047     | 4691  | - | 0.047502171 | -           | 0.086305207 |
| HAS2-AS1  | 594842   | 2300  | - | 0.096883776 | -           | 0.088012549 |
| HCAR3     | 8843     | 2152  | - | 0.207093573 | 0.392722605 | 21.63505506 |
| CASC2     | 255082   | 2407  | - | -           | -           | 0.168200135 |
| UNC45B    | 146862   | 5694  | - | -           | -           | 0.071102516 |
| ZHX1-C80  | 1.01E+08 | 1542  | - | 0.144508875 | 0.274039898 | -           |
| C4orf45   | 152940   | 817   | - | -           | -           | 0.495541892 |
| CXCL11    | 6373     | 1610  | - | 0.138405394 | -           | 5.155020734 |
| BTBD19    | 149478   | 1572  | - | 0.425253215 | -           | 2.060344661 |
| USH2A     | 7399     | 18883 | - | 0.011800704 | -           | -           |
| TEAD2     | 8463     | 2220  | - | 0.401500333 | 0.095173316 | 0.455920863 |
| TMEM183   | 653659   | 1706  | - | 0.130617049 | -           | -           |
| TMEM51    | 55092    | 2031  | - | -           | -           | 0.099669553 |
| ADAM20    | 8748     | 2807  | - | -           | 0.075270667 | 0.072115733 |
| ZNF594    | 84622    | 4877  | - | 0.091381048 | -           | 0.124520523 |
| PLEKHA6   | 22874    | 7434  | - | 0.179848817 | -           | 0.408452104 |
| RUNDC3A   | 10900    | 1879  | - | -           | 0.112445323 | -           |
| TTPA      | 7274     | 2633  | - | 0.08463072  | -           | -           |
| HOXA7     | 3204     | 2018  | - | 0.11042254  | -           | -           |
| RPSAP52   | 204010   | 1169  | - | 0.381236415 | 0.180739745 | -           |
| VRTN      | 55237    | 3464  | - | 0.064328142 | -           | -           |
| GPR144    | 347088   | 2892  | - | -           | -           | 0.139992298 |
| PRH1      | 5554     | 673   | - | 0.331103543 | -           | -           |
| CACNG4    | 27092    | 3430  | - | -           | -           | 0.059017161 |
| BAIAP2    | 10458    | 3352  | - | 0.199432594 | 0.56729202  | 2.838352195 |
| TAS2R60   | 338398   | 957   | - | -           | 0.220778225 | -           |
| TRPC2     | 7221     | 1196  | - | 0.186314954 | -           | 0.677019609 |
| RUSC2     | 9853     | 5636  | - | -           | 0.037488425 | 0.107751346 |
| SLC9A11   | 284525   | 4427  | - | 0.050334919 | -           | 0.091451937 |
| KRT80     | 144501   | 3894  | - | -           | 0.108518111 | -           |
| HCRTR1    | 3061     | 2001  | - | 0.111360662 | -           | -           |
| LOC146330 | 146336   | 2948  | - | 0.075587749 | -           | 0.137333014 |
| TMEM30C   | 644444   | 319   | - | -           | -           | 0.634573238 |
| LRRC24    | 441381   | 1789  | - | -           | -           | 0.113151964 |
| C1orf173  | 127254   | 7170  | - | 0.031078478 | -           | 0.056465513 |
| CYGB      | 114757   | 1951  | - | -           | 0.108295623 | -           |
| LOC100500 | 1.01E+08 | 2935  | - | -           | -           | 0.068970652 |
| FAM83E    | 54854    | 2011  | - | 0.221613809 | 0.105064526 | 0.100660797 |
| POTEKP    | 440915   | 2933  | - | -           | 0.072037082 | -           |
| GGNBP1    | 449520   | 999   | - | 0.22305574  | -           | 0.202631494 |
| ATP8A2    | 51761    | 5006  | - | -           | 0.042206305 | -           |
| C10orf105 | 414152   | 4837  | - | 5.067520224 | 0.131042854 | 8.830368014 |
| SLC2A7    | 155184   | 1539  | - | 0.144790568 | -           | -           |
| C9orf50   | 375759   | 1624  | - | 1.234910199 | -           | 1.121834832 |
| GUCY2GP   | 390003   | 2974  | - | 0.074926928 | -           | -           |
| GPR25     | 2848     | 1086  | - | 0.615559903 | -           | 0.186398585 |
| GRIN3B    | 116444   | 3270  | - | -           | -           | 0.061904851 |
| TMEM145   | 284339   | 1779  | - | 0.125257271 | 0.237532053 | 0.113788006 |
| LOC348760 | 348761   | 3526  | - | -           | 0.05992194  | -           |
| POM121L2  | 94026    | 3170  | - | 0.070294222 | 0.066651344 | -           |

|           |          |       |   |             |             |             |
|-----------|----------|-------|---|-------------|-------------|-------------|
| FCGR3A    | 2214     | 2406  | - | -           | -           | 1.177890308 |
| ZNF454    | 285676   | 2172  | - | -           | -           | 0.093199292 |
| HCG9      | 10255    | 670   | - | 0.665172193 | -           | -           |
| RBPMS2    | 348093   | 2019  | - | 0.110367848 | 0.104648223 | 0.100261943 |
| FOXE1     | 2304     | 3473  | - | -           | -           | 0.058286456 |
| C14orf39  | 317761   | 2779  | - | -           | 0.076029061 | -           |
| CLCA2     | 9635     | 4043  | - | -           | -           | 0.050068974 |
| TMED11P   | 1E+08    | 545   | - | -           | -           | 0.371429106 |
| LOC64258  | 642587   | 899   | - | -           | -           | 0.225171149 |
| FBXO32    | 114907   | 1530  | - | 0.145642278 | 0.138094615 | 1.190758017 |
| RNU11     | 26824    | 135   | - | 1.65061248  | 1.565072306 | 1.499473059 |
| GFRA2     | 2675     | 3376  | - | -           | 0.125168697 | -           |
| THRSP     | 7069     | 1182  | - | 0.18852173  | 0.178751913 | 0.171259613 |
| GREB1L    | 80000    | 6052  | - | -           | 0.06982312  | -           |
| AQP7      | 364      | 1258  | - | 0.1771325   | -           | -           |
| KIAA0284  | 283638   | 6715  | - | -           | 0.062929192 | -           |
| USHBP1    | 83878    | 2410  | - | -           | -           | 0.167990758 |
| CELA3A    | 10136    | 922   | - | -           | -           | 0.219554081 |
| COBLL1    | 22837    | 4923  | - | -           | 0.042917888 | -           |
| SVEP1     | 79987    | 12356 | - | -           | -           | 0.016383042 |
| TMEM63C   | 57156    | 5434  | - | 0.041007119 | -           | 0.111756825 |
| SERPINE3  | 647174   | 1441  | - | 0.154637533 | 0.146623707 | 0.28095609  |
| COL12A1   | 1303     | 11579 | - | 0.019244553 | -           | -           |
| CAMK2B    | 816      | 4586  | - | 0.14576931  | 0.138215064 | 0.750390465 |
| CYP7A1    | 1581     | 2875  | - | -           | -           | 0.070410039 |
| LOC14547  | 145474   | 1859  | - | 0.119866963 | -           | 0.217782531 |
| TMX2-CTM  | 1.01E+08 | 6251  | - | 0.035647526 | -           | -           |
| LHX2      | 9355     | 2416  | - | 0.461160357 | 0.087452302 | -           |
| SHBG      | 6462     | 1311  | - | -           | -           | 0.154407981 |
| GDNF      | 2668     | 3830  | - | 0.058180858 | -           | 0.052853489 |
| LRRC32    | 2615     | 4327  | - | 2.986895243 | -           | 14.22194923 |
| C1QC      | 714      | 1205  | - | -           | 0.350680102 | 0.167990758 |
| HSP90B3P  | 343477   | 1362  | - | -           | -           | 0.148626184 |
| CR1L      | 1379     | 1837  | - | 0.363907487 | 0.230032402 | 0.991758175 |
| PLEKHD1   | 400224   | 1812  | - | 0.122976095 | -           | 0.223431416 |
| PDGFB     | 5155     | 3393  | - | -           | -           | 0.238642927 |
| LOC15409  | 154092   | 1717  | - | 0.778681484 | -           | 0.3536905   |
| C10orf81  | 79949    | 3459  | - | 0.128842258 | -           | 0.117044731 |
| RUNDC3A   | 10900    | 2047  | - | -           | -           | 0.296671514 |
| GRID2IP   | 392862   | 4632  | - | -           | -           | 0.043702259 |
| PHYHD1    | 254295   | 2155  | - | 0.206805276 | 0.294131918 | 0.281803522 |
| SFN       | 2810     | 1336  | - | 0.333581863 | -           | -           |
| RGS4      | 5999     | 3480  | - | -           | -           | 0.116338427 |
| ESYT3     | 83850    | 4449  | - | -           | 0.047490394 | -           |
| HSD11B1   | 3290     | 1479  | - | 0.451993275 | -           | 3.558587178 |
| SCUBE2    | 57758    | 4550  | - | 0.097948433 | -           | 0.6673479   |
| DOCK9     | 23348    | 7661  | - | -           | -           | 0.026423295 |
| TSPAN16   | 26526    | 1040  | - | -           | -           | 0.389286275 |
| C13orf15  | 28984    | 1126  | - | -           | -           | 0.179776965 |
| OR2B11    | 127623   | 954   | - | 0.233577238 | -           | -           |
| GCNT3     | 9245     | 2240  | - | -           | -           | 0.090370028 |
| APITD1-CC | 1.01E+08 | 1349  | - | 0.165183606 | -           | -           |
| C1orf170  | 84808    | 3041  | - | 0.073276121 | 0.138957423 | 0.066566545 |
| HNRNPUL2  | 1.01E+08 | 4014  | - | -           | 0.052636961 | 0.050430708 |
| ACP5      | 54       | 1663  | - | -           | -           | 0.365175339 |
| IFNA2     | 3440     | 1143  | - | -           | -           | 2.479443641 |
| AFAP1L2   | 84632    | 3997  | - | -           | 0.052860836 | -           |
| LIF       | 3976     | 3935  | - | 3.341074562 | -           | 11.31749679 |
| LPAL2     | 80350    | 2041  | - | -           | 2.173924541 | 2.082805547 |
| TLR8      | 51311    | 4216  | - | 0.158562157 | 0.100229963 | 1.680505266 |
| FAM138D   | 677784   | 1128  | - | 0.197546706 | -           | -           |
| FLRT2     | 23768    | 7185  | - | -           | -           | 0.028173815 |

|           |          |       |   |             |             |             |
|-----------|----------|-------|---|-------------|-------------|-------------|
| CCDC155   | 147872   | 2383  | - | 0.09350931  | -           | -           |
| HMCN1     | 83872    | 18212 | - | 0.024470974 | -           | 0.088921091 |
| TLR2      | 7097     | 3417  | - | -           | -           | 0.118483385 |
| PPY       | 5539     | 457   | - | -           | -           | 0.44295156  |
| ANXA10    | 11199    | 1447  | - | -           | -           | 0.279791103 |
| LSP1      | 4046     | 1756  | - | -           | 0.120321618 | -           |
| KRT78     | 196374   | 1785  | - | -           | 0.118366813 | 0.226811051 |
| CROT      | 54677    | 3342  | - | -           | 0.063221054 | -           |
| PRR23A    | 729627   | 2307  | - | 0.096589807 | 0.18316841  | 0.438727488 |
| C4BPA     | 722      | 2256  | - | 0.790186825 | -           | 0.179458212 |
| VSTM1     | 284415   | 1034  | - | -           | -           | 0.195772595 |
| FXD4      | 53828    | 787   | - | -           | -           | 1.028863344 |
| SUSD2     | 56241    | 3201  | - | -           | 0.198017583 | -           |
| PCDHB11   | 56125    | 3271  | - | 0.068123719 | -           | -           |
| GOLGA8C   | 729786   | 5282  | - | -           | 0.040000901 | -           |
| HHIP      | 64399    | 3555  | - | 0.062681487 | 0.059433126 | -           |
| GNAI1     | 2770     | 3318  | - | -           | -           | 0.061009302 |
| C16orf11  | 146325   | 2245  | - | -           | 0.094113479 | -           |
| MSR1      | 4481     | 3761  | - | -           | -           | 0.376762042 |
| FGFBP1    | 9982     | 1219  | - | -           | -           | 0.166061413 |
| PANX3     | 116337   | 1609  | - | -           | 0.131314333 | -           |
| CLMP      | 79827    | 2645  | - | -           | 0.079880817 | -           |
| NME2      | 4831     | 867   | - | 27.75770467 | -           | -           |
| FKBP1A-SD | 1.01E+08 | 1689  | - | -           | -           | 0.11985131  |
| DEFA1     | 1667     | 514   | - | 2.601159744 | -           | 1.575321891 |
| SPARCL1   | 8404     | 3058  | - | 0.072868765 | -           | -           |
| ZNF781    | 163115   | 3142  | - | -           | 0.067245309 | -           |
| KITLG     | 4254     | 5460  | - | -           | -           | 0.037074883 |
| MRC1      | 4360     | 5171  | - | -           | -           | 0.039146947 |
| ALS2CL    | 259173   | 5224  | - | 0.34124454  | -           | 0.271248476 |
| TRIM34    | 53840    | 2326  | - | -           | -           | 0.261086238 |
| SLC34A3   | 142680   | 2180  | - | -           | -           | 0.185714553 |
| LINC00240 | 1E+08    | 983   | - | 0.226686353 | -           | -           |
| psiTPTE22 | 387590   | 1483  | - | 0.150258048 | -           | 0.545998282 |
| FAM27A    | 548321   | 703   | - | 0.316973947 | -           | -           |
| FAM163A   | 148753   | 2927  | - | -           | 0.072184749 | -           |
| MYH1      | 4619     | 6038  | - | 0.036905049 | 0.034992508 | -           |
| CNTNAP4   | 85445    | 4867  | - | -           | -           | 0.041592123 |
| FLJ39739  | 388685   | 1065  | - | -           | 0.198389447 | 0.19007405  |
| FNDC7     | 163479   | 3064  | - | -           | 0.068957168 | -           |
| TSPAN6    | 7105     | 2069  | - | 0.107700669 | -           | -           |
| MYH8      | 4626     | 6038  | - | -           | 0.034992508 | -           |
| SLC22A13  | 9390     | 2560  | - | -           | -           | 0.158147549 |
| PAPPA2    | 60676    | 6940  | - | -           | -           | 0.029168424 |
| C20orf201 | 198437   | 894   | - | -           | 0.236336422 | -           |
| LOC153910 | 153910   | 2293  | - | -           | -           | 0.088281231 |
| ARNTL     | 406      | 2828  | - | -           | -           | 0.07158022  |
| SYNGR3    | 9143     | 2076  | - | -           | -           | 0.097509086 |
| NR5A2     | 2494     | 5054  | - | 0.044090361 | -           | 0.080106396 |
| PLEKHB1   | 58473    | 2391  | - | -           | -           | 0.084662845 |
| FAM198B   | 51313    | 4854  | - | -           | 0.087055938 | 0.041703515 |
| PRR4      | 11272    | 353   | - | 0.631254064 | -           | -           |
| LOC152024 | 152024   | 2241  | - | 0.099434487 | 0.094281464 | -           |
| ADAMTS2   | 9509     | 6772  | - | 0.065810007 | 0.124799032 | 0.538056635 |
| OR52K2    | 119774   | 1067  | - | 0.417680759 | 0.198017583 | 2.276613267 |
| LOC729121 | 729121   | 1674  | - | 0.266227819 | 0.126215509 | 0.120925247 |
| ARHGAP29  | 9411     | 9121  | - | -           | -           | 0.022193714 |
| SGCG      | 6445     | 1661  | - | -           | 0.127203348 | -           |
| EDN1      | 1906     | 2112  | - | 0.4220316   | 0.3001204   | 7.188524963 |
| POU4F3    | 5459     | 1182  | - | -           | -           | 0.342519227 |
| LINC00264 | 645528   | 1117  | - | 0.199492108 | -           | -           |
| GNAO1     | 2775     | 3332  | - | -           | -           | 0.06075296  |

|           |          |       |   |             |             |             |
|-----------|----------|-------|---|-------------|-------------|-------------|
| KNG1      | 3827     | 2732  | - | 0.407819701 | -           | -           |
| HSF5      | 124535   | 4107  | - | 0.054256802 | -           | -           |
| PDCD1     | 5133     | 2115  | - | 0.105358243 | -           | 0.574266278 |
| RNU5A-1   | 26831    | 116   | - | -           | -           | 1.745076405 |
| CORO2B    | 10391    | 3623  | - | 0.184515058 | 0.058317627 | 9.889569071 |
| C19orf75  | 284369   | 1706  | - | -           | 0.123848043 | -           |
| MFAP3L    | 9848     | 6204  | - | -           | 0.034056216 | -           |
| PDZD3     | 79849    | 2363  | - | 0.094300755 | -           | 0.085666044 |
| PRRT2     | 112476   | 2606  | - | -           | 0.081076271 | 0.310711992 |
| TMEM217   | 221468   | 2009  | - | 0.332751645 | -           | 0.403044028 |
| CKLF-CMT1 | 1.01E+08 | 635   | - | 0.350917614 | -           | -           |
| TMEM176   | 28959    | 1444  | - | 0.154316264 | 0.292638174 | -           |
| KCNE1     | 3753     | 3392  | - | 1.510952756 | 0.124578279 | 3.043594343 |
| LOC38949  | 389493   | 682   | - | -           | 0.619603406 | -           |
| WISP2     | 8839     | 1433  | - | 0.311001654 | -           | -           |
| TMOD1     | 7111     | 3352  | - | -           | -           | 0.060390472 |
| C15orf50  | 414926   | 1330  | - | -           | 0.158860723 | 0.152202153 |
| DPY19L2P3 | 442524   | 1691  | - | 0.527102743 | 0.499786544 | 0.359128675 |
| NR2E3     | 10002    | 1999  | - | -           | 0.105695228 | -           |
| MLLT4     | 4301     | 7629  | - | -           | 0.027694948 | -           |
| SULT1B1   | 27284    | 1320  | - | 0.16881264  | -           | -           |
| APITD1-CC | 1.01E+08 | 1383  | - | -           | 0.152772785 | -           |
| HLA-DQB1  | 3119     | 1241  | - | 0.179558972 | -           | -           |
| PPFIA2    | 8499     | 5424  | - | 0.041082722 | -           | 0.037320956 |
| SDPR      | 8436     | 3265  | - | 1.706222701 | -           | 2.727984677 |
| C21orf90  | 114043   | 1045  | - | -           | 0.202186375 | -           |
| KIR2DL4   | 3805     | 1610  | - | -           | 0.262465542 | 0.502928852 |
| OVCH2     | 341277   | 1695  | - | -           | 0.124651777 | -           |
| LOC72887  | 728875   | 772   | - | -           | 0.273684924 | -           |
| S100A12   | 6283     | 466   | - | 2.390908635 | 2.267003877 | 9.556727436 |
| KCNK4     | 50801    | 1820  | - | 0.244871082 | -           | -           |
| GPR45     | 11250    | 1725  | - | 0.258356736 | -           | -           |
| SLC12A1   | 6557     | 4717  | - | 0.09448068  | -           | -           |
| CNTN2     | 6900     | 7670  | - | -           | 0.027546905 | -           |
| FLT4      | 2324     | 4534  | - | -           | 0.093200159 | -           |
| EDNRB     | 1910     | 4296  | - | 0.051869806 | 0.049181741 | -           |
| ZNF750    | 79755    | 3218  | - | 0.069245707 | -           | -           |
| TDRD6     | 221400   | 8977  | - | -           | -           | 0.022549723 |
| LCK       | 3932     | 2135  | - | -           | -           | 0.094814456 |
| PLK2      | 10769    | 2795  | - | -           | 0.075593832 | -           |
| LOC57255  | 572558   | 536   | - | -           | -           | 0.377665789 |
| GPR88     | 54112    | 3465  | - | 0.064309577 | -           | 0.116842057 |
| MYO16     | 23026    | 7436  | - | -           | -           | 0.108891266 |
| DSCR9     | 257203   | 458   | - | -           | -           | 0.441984417 |
| CCDC162P  | 221262   | 715   | - | -           | 0.295503163 | -           |
| PSAPL1    | 768239   | 4700  | - | -           | -           | 0.043069971 |
| SPIN2A    | 54466    | 1351  | - | -           | 0.156391385 | -           |
| F2        | 2147     | 2018  | - | -           | 0.10470008  | 0.100311627 |
| CDC42BPA  | 8476     | 10527 | - | 0.021167729 | -           | -           |
| LOC44245  | 442459   | 2175  | - | -           | -           | 0.093070742 |
| OR2AE1    | 81392    | 972   | - | -           | 0.217371154 | -           |
| CDH17     | 1015     | 3699  | - | 0.180723994 | 0.171358282 | -           |
| NR1H4     | 9971     | 2492  | - | 0.089419215 | -           | -           |
| CNGB1     | 1258     | 5663  | - | -           | 0.149238751 | 0.178729351 |
| ESX1      | 80712    | 1591  | - | -           | 0.132799976 | -           |
| GBP7      | 388646   | 2454  | - | -           | -           | 0.247468048 |
| ABI3BP    | 25890    | 4488  | - | -           | -           | 0.04510447  |
| DBH       | 1621     | 2812  | - | -           | 0.075136828 | -           |
| CAGE1     | 285782   | 3255  | - | -           | 0.064910833 | -           |
| BRD7P3    | 23629    | 2474  | - | -           | -           | 0.245467498 |
| PRR18     | 285800   | 2704  | - | -           | -           | 0.074862745 |
| GLIS3-AS1 | 84850    | 730   | - | 0.610500506 | -           | 0.554599625 |

|           |          |      |   |             |             |             |
|-----------|----------|------|---|-------------|-------------|-------------|
| CELF5     | 60680    | 5008 | - | 0.088990689 | -           | -           |
| OR52K1    | 390036   | 1030 | - | -           | -           | 1.17919726  |
| TNFRSF18  | 8784     | 1214 | - | -           | -           | 0.166745357 |
| LOC723809 | 723809   | 1911 | - | -           | -           | 0.105928238 |
| FOXH1     | 8928     | 2193 | - | 0.101610891 | 0.09634508  | -           |
| AP1M2     | 10053    | 1756 | - | 0.126897884 | -           | -           |
| PATE1     | 160065   | 1576 | - | 0.141391297 | -           | -           |
| C14orf23  | 387978   | 3154 | - | 0.07065082  | -           | -           |
| TRIM67    | 440730   | 8522 | - | 0.026147933 | -           | -           |
| SEL1L2    | 80343    | 2248 | - | -           | 0.093987883 | -           |
| SLC35F4   | 341880   | 1779 | - | -           | -           | 0.113788006 |
| DDIT4L    | 115265   | 2649 | - | 0.084119549 | -           | -           |
| CLEC1A    | 51267    | 1791 | - | -           | -           | 0.45210243  |
| OR1K1     | 392392   | 951  | - | -           | 0.222171148 | -           |
| RARRES1   | 5918     | 1545 | - | 0.144228275 | -           | 0.131021918 |
| CCL3L1    | 6349     | 804  | - | -           | 0.788375975 | 3.776657891 |
| TAS2R38   | 5726     | 1143 | - | -           | -           | 0.354206234 |
| MGC39372  | 221756   | 1272 | - | 0.175182928 | -           | 0.477426564 |
| CLEC6A    | 93978    | 1613 | - | 0.138147976 | -           | 0.878488556 |
| FFAR1     | 2864     | 923  | - | -           | -           | 0.219316211 |
| FAM3B     | 54097    | 1384 | - | -           | -           | 0.585054517 |
| PDYN      | 5173     | 2800 | - | 0.318332407 | -           | 0.506072157 |
| VHLL      | 391104   | 1014 | - | 0.219756099 | -           | -           |
| GRIK1     | 2897     | 3489 | - | 0.127734414 | 0.30278699  | 0.232076656 |
| ARG1      | 383      | 1447 | - | 7.083831028 | 0.43804719  | 88.13419742 |
| ZNF20     | 7568     | 3077 | - | -           | -           | 0.065787736 |
| ADCY4     | 196883   | 3720 | - | 0.539111334 | -           | 1.741323552 |
| SORT1     | 6272     | 7034 | - | 0.095038108 | -           | 0.259007644 |
| POC1B-GA  | 1.01E+08 | 4740 | - | 0.047011115 | -           | -           |
| PDK4      | 5166     | 3710 | - | -           | -           | 0.054563036 |
| LOC339524 | 339524   | 3429 | - | -           | -           | 0.23613749  |
| OVOL1     | 5017     | 3007 | - | -           | 0.140528607 | 0.269276838 |
| ESPNP     | 284729   | 2015 | - | -           | 0.104855961 | -           |
| LINC00244 | 64433    | 611  | - | 0.364701612 | -           | -           |
| KIAA0125  | 9834     | 9613 | - | -           | 0.153853462 | 0.147404769 |
| NR5A1     | 2516     | 3095 | - | 0.071997636 | -           | 0.130810251 |
| RUFY4     | 285180   | 3638 | - | 0.12250285  | -           | 0.500786082 |
| ZNF85     | 7639     | 2331 | - | 0.286785952 | -           | -           |
| AMZ1      | 155185   | 4415 | - | 0.100943459 | -           | 0.091700504 |
| SPDEF     | 25803    | 1894 | - | 0.117651893 | -           | -           |
| FOXE3     | 2301     | 2000 | - | -           | 0.211284761 | -           |
| OLFM4     | 10562    | 2935 | - | 0.1518451   | -           | 0.206911955 |
| FAM177B   | 400823   | 1345 | - | -           | -           | 0.150504731 |
| SAT2      | 112483   | 983  | - | -           | 1.074693598 | 4.942312015 |
| NLRP9     | 338321   | 3484 | - | 0.063958865 | 0.060644306 | -           |
| TC2N      | 123036   | 5030 | - | -           | 0.084009845 | -           |
| STXBP6    | 29091    | 1970 | - | 0.226226076 | 0.107251148 | -           |
| CDH13     | 1012     | 4134 | - | 0.053902439 | -           | 0.097933654 |
| FAM171A1  | 221061   | 3964 | - | 0.224856392 | 0.053300898 | 0.919202708 |
| GPR152    | 390212   | 1429 | - | 0.155936098 | -           | 0.141657707 |
| C14orf166 | 145497   | 1734 | - | -           | -           | 0.233481964 |
| UBL4B     | 164153   | 1510 | - | 0.147571314 | -           | 0.268117699 |
| TBX5      | 6910     | 3921 | - | 0.056830575 | -           | -           |
| C14orf183 | 196913   | 975  | - | 0.228546343 | -           | -           |
| FAM132A   | 388581   | 1055 | - | 0.211215815 | 0.200269916 | -           |
| PCDHGA3   | 56112    | 4605 | - | 0.096778582 | -           | -           |
| ODF3      | 113746   | 1331 | - | -           | -           | 0.152087801 |
| LINC00421 | 1E+08    | 1067 | - | 0.208840379 | 0.198017583 | -           |
| TNFAIP8L2 | 1.01E+08 | 1948 | - | 0.22878099  | 0.108462403 | -           |
| CHADL     | 150356   | 2533 | - | 0.087971846 | -           | -           |
| ALX4      | 60529    | 5466 | - | 0.040767048 | 0.038654365 | 0.111102559 |
| C15orf63  | 25764    | 1295 | - | -           | -           | 0.156315724 |

|           |          |      |   |             |             |             |
|-----------|----------|------|---|-------------|-------------|-------------|
| C13orf35  | 400165   | 2241 | - | 0.198868973 | 0.188562928 | -           |
| NAA11     | 84779    | 1549 | - | 0.143855833 | -           | -           |
| ANGPTL7   | 10218    | 2255 | - | -           | -           | 0.089768897 |
| LOC10052  | 1.01E+08 | 382  | - | 1.166663271 | -           | -           |
| RAPSN     | 5913     | 1671 | - | -           | 0.252884215 | 0.121142348 |
| WFDC12    | 128488   | 774  | - | -           | -           | 0.261535999 |
| CRHR2     | 1395     | 3131 | - | -           | 0.067481559 | -           |
| NIPAL1    | 152519   | 2204 | - | -           | 0.095864229 | 0.091846127 |
| FGD5      | 152273   | 5897 | - | -           | -           | 0.034327431 |
| C1orf187  | 374946   | 1773 | - | -           | 0.119167942 | 0.228346151 |
| WDR16     | 146845   | 2207 | - | 0.100966327 | 0.4786696   | -           |
| OR5B21    | 219968   | 930  | - | 0.479210075 | 0.227187915 | 1.305992664 |
| ADAM12    | 8038     | 6093 | - | -           | 0.069353278 | 0.033223184 |
| PURG      | 29942    | 1972 | - | -           | 0.107142374 | -           |
| PBX1      | 5087     | 6918 | - | 0.032210564 | -           | -           |
| LILRB5    | 10990    | 2282 | - | -           | -           | 0.088706776 |
| TRIM72    | 493829   | 2152 | - | 0.31064036  | 0.098180651 | 0.376261827 |
| AACSP1    | 729522   | 2175 | - | -           | 0.097142419 | 0.093070742 |
| RBAK-LOC3 | 1.01E+08 | 858  | - | -           | 0.246252636 | -           |
| EGLN2     | 112398   | 2264 | - | -           | 0.466618289 | -           |
| CRIP3     | 401262   | 956  | - | -           | -           | 0.211745673 |
| MAP1LC3B  | 643246   | 832  | - | 0.267827746 | 0.507896061 | 0.486607844 |
| KRT17     | 3872     | 1574 | - | 0.849425736 | 0.134234283 | 2.057726688 |
| FLJ32224  | 440584   | 1138 | - | -           | -           | 0.355762501 |
| TPD52L1   | 7164     | 1409 | - | -           | 0.149953699 | -           |
| LOC40004  | 400043   | 1411 | - | -           | 0.149741149 | -           |
| IQUB      | 154865   | 3115 | - | 0.143070745 | 0.067828174 | 0.064985189 |
| MTUS2     | 23281    | 6957 | - | 0.064059993 | -           | 0.116388594 |
| C20orf152 | 140894   | 1936 | - | 0.230199054 | -           | -           |
| HSD17B14  | 51171    | 1277 | - | -           | -           | 0.158519078 |
| WNK2      | 65268    | 6834 | - | -           | -           | 0.029620846 |
| POU5F1B   | 5462     | 1599 | - | 0.139357526 | -           | -           |
| GAS2L2    | 246176   | 3025 | - | -           | 0.069846202 | -           |
| OR52N4    | 390072   | 1037 | - | 0.429764098 | 0.203746154 | 0.976031162 |
| FAM83C    | 128876   | 3191 | - | 0.069831615 | -           | 0.063437437 |
| GIMAP5    | 55340    | 1895 | - | 0.117589807 | -           | 0.106822619 |
| RLN1      | 6013     | 967  | - | -           | -           | 0.209336983 |
| ENOX1     | 55068    | 3037 | - | 0.073372632 | -           | -           |
| ATP2C2    | 9914     | 3403 | - | 0.065481247 | -           | 0.654339551 |
| GRIK1-AS2 | 1E+08    | 1073 | - | 0.415345172 | 0.590730926 | 0.754627635 |
| TREML4    | 285852   | 2088 | - | -           | -           | 0.290846067 |
| WNT4      | 54361    | 3905 | - | 0.057063428 | 0.054106213 | 0.051838377 |
| HABP2     | 3026     | 3019 | - | -           | -           | 0.067051627 |
| CFB       | 629      | 2646 | - | 0.084214922 | -           | 0.61202982  |
| MYADML2   | 255275   | 2469 | - | -           | 0.085575035 | -           |
| AIM1L     | 55057    | 5245 | - | 0.042484783 | 0.040283081 | 0.038594635 |
| S100A14   | 57402    | 1057 | - | -           | -           | 0.191512642 |
| FAM20A    | 54757    | 3712 | - | -           | 0.056919386 | -           |
| HNF4A     | 3172     | 3239 | - | -           | 0.065231479 | 0.062497333 |
| PRCD      | 768206   | 2081 | - | 0.107079618 | -           | -           |
| GPR1      | 2825     | 2330 | - | 0.382545382 | 0.36272062  | 0.521276042 |
| CST6      | 1474     | 618  | - | -           | 0.683769454 | -           |
| LOC10010  | 1E+08    | 1255 | - | 0.177555924 | 0.336708783 | 0.806489494 |
| CACNG1    | 786      | 1327 | - | -           | -           | 0.152546242 |
| WDR69     | 164781   | 1669 | - | 0.934588852 | -           | 4.60892558  |
| TAS2R50   | 259296   | 1000 | - | -           | 0.211284761 | 0.202428863 |
| SYN3      | 8224     | 3147 | - | -           | 0.067138469 | -           |
| ELN       | 2006     | 3480 | - | -           | -           | 0.058169213 |
| ITGAD     | 3681     | 3912 | - | 0.170883961 | 0.054009397 | 0.672693052 |
| EVC       | 2121     | 6430 | - | 0.069310322 | -           | -           |
| SLC18A1   | 6570     | 2974 | - | 0.074926928 | -           | 0.272264779 |
| TFF3      | 7033     | 1054 | - | -           | 0.200459925 | -           |

|          |        |       |   |             |             |             |
|----------|--------|-------|---|-------------|-------------|-------------|
| FAP      | 2191   | 2788  | - | -           | 0.07578363  | 0.653464766 |
| ATP4B    | 496    | 1509  | - | 0.147669109 | -           | -           |
| KLHL33   | 123103 | 1863  | - | -           | 0.113411037 | -           |
| TRIM31   | 11074  | 2049  | - | -           | -           | 0.889145811 |
| POU5F1P3 | 642559 | 1084  | - | 0.616695622 | -           | 0.560227481 |
| C19orf46 | 163183 | 1541  | - | 0.289205301 | 0.137108865 | 0.131362014 |
| ZNF683   | 257101 | 1668  | - | -           | -           | 0.12136023  |
| TMEM191  | 728229 | 1334  | - | -           | 0.316768758 | -           |
| APLP1    | 333    | 2450  | - | -           | -           | 0.082624026 |
| TSGA10IP | 254187 | 1726  | - | -           | -           | 0.586410379 |
| HAP1     | 9001   | 3944  | - | 0.112998319 | 0.053571187 | 0.15397733  |
| HOXC12   | 3228   | 849   | - | -           | 0.248863088 | 0.476864224 |
| RBP7     | 116362 | 704   | - | -           | -           | 0.575081997 |
| HIST1H4I | 8294   | 370   | - | -           | 0.571039896 | 0.547105035 |
| DDX39B   | 7919   | 2044  | - | -           | -           | 1.188427767 |
| KLK11    | 11012  | 1289  | - | -           | -           | 0.157043338 |
| LOC40117 | 401177 | 2322  | - | -           | 0.090992576 | -           |
| FABP5P3  | 220832 | 856   | - | 1.041274228 | -           | 0.236482317 |
| WDR65    | 149465 | 3125  | - | -           | 0.067611124 | -           |
| LOC44033 | 440335 | 890   | - | 14.77205438 | -           | 7.050892979 |
| NACAD    | 23148  | 4778  | - | -           | -           | 0.084733722 |
| PTRF     | 284119 | 3651  | - | 0.061033329 | 0.057870381 | 0.055444772 |
| DNAH3    | 55567  | 12351 | - | -           | 0.034213385 | 0.016389674 |
| NPBWR2   | 2832   | 1002  | - | 0.444775818 | -           | -           |
| REM2     | 161253 | 1885  | - | 0.472854503 | -           | 0.322167952 |
| USP50    | 373509 | 1392  | - | -           | 0.15178503  | 0.290846067 |
| GUCY2D   | 3000   | 3641  | - | 0.061200957 | -           | -           |
| IGFALS   | 3483   | 2282  | - | -           | 0.092587538 | 0.266120328 |
| PCSK1    | 5122   | 5166  | - | -           | 0.040899102 | -           |
| ZNF467   | 168544 | 2295  | - | 0.291284555 | 0.092063077 | 0.793838678 |
| NHS      | 4810   | 8776  | - | 0.050782289 | 0.024075292 | 0.046132375 |
| CNR1     | 1268   | 8974  | - | 0.049661842 | -           | 0.157900829 |
| MGC34034 | 154089 | 3517  | - | -           | 0.06007528  | -           |
| HEPACAM  | 253012 | 2110  | - | -           | -           | 0.09593785  |
| ORM1     | 5004   | 847   | - | 2.630846337 | 0.748352165 | 31.06936503 |
| PTN      | 5764   | 1558  | - | -           | -           | 0.129928667 |
| C1orf194 | 127003 | 742   | - | -           | 0.569500704 | -           |
| RARRES2  | 5919   | 767   | - | -           | 0.27546905  | -           |
| NPEPL1   | 79716  | 2160  | - | -           | -           | 1.124604794 |
| TMEM132  | 54972  | 3520  | - | -           | 0.06002408  | -           |
| GDPD4    | 220032 | 2545  | - | -           | 0.083019553 | -           |
| RNF151   | 146310 | 796   | - | 0.279940559 | -           | -           |
| ZNF208   | 7757   | 9088  | - | 0.024519442 | -           | 0.044548605 |
| LCA5     | 167691 | 4729  | - | 0.047120466 | -           | 0.04280585  |
| PPP1R26  | 9858   | 4959  | - | -           | -           | 0.040820501 |
| PCDHGB6  | 56100  | 4599  | - | -           | 0.045941457 | -           |
| KRTAP2-4 | 85294  | 812   | - | 0.274424489 | -           | -           |
| TMEM37   | 140738 | 1687  | - | 0.132088136 | 0.751457361 | 0.359980195 |
| DLG3     | 1741   | 5087  | - | -           | -           | 0.039793368 |
| ACP5     | 54     | 1506  | - | 0.14796327  | -           | -           |
| C17orf87 | 388325 | 666   | - | 0.669167221 | -           | 2.735525175 |
| FCGR3A   | 2214   | 2204  | - | 0.101103759 | -           | -           |
| PPP1R1B  | 84152  | 1528  | - | 0.145832909 | -           | -           |
| NIM1     | 167359 | 2326  | - | 0.09580081  | -           | 0.087028746 |
| DDO      | 8528   | 1733  | - | 0.514328182 | 0.243837001 | 1.401700147 |
| GPR114   | 221188 | 3848  | - | 16.90934094 | 0.109815365 | 34.72012722 |
| IFNW1    | 3467   | 1514  | - | 0.14718143  | -           | -           |
| ELAVL3   | 1995   | 4682  | - | 0.142780447 | -           | -           |
| SULT1E1  | 6783   | 1805  | - | 0.123453011 | -           | -           |
| SULF1    | 23213  | 5716  | - | 0.038984025 | -           | -           |
| ARR3     | 407    | 1331  | - | 0.167417494 | 0.317482737 | -           |
| FAM181A  | 90050  | 1848  | - | 0.241160914 | -           | 0.109539428 |



|           |        |       |   |             |             |             |
|-----------|--------|-------|---|-------------|-------------|-------------|
| PKP3      | 11187  | 2845  | - | -           | 0.148530588 | -           |
| C9orf24   | 84688  | 1184  | - | -           | -           | 0.170970323 |
| WBSCR17   | 64409  | 3298  | - | 0.067566005 | -           | -           |
| PNOG      | 5368   | 1245  | - | -           | -           | 2.926682356 |
| GPD1      | 2819   | 2909  | - | 0.076601129 | 0.072631406 | 0.139174192 |
| AVPR1B    | 553    | 1773  | - | -           | 0.119167942 | -           |
| SLN       | 6588   | 738   | - | -           | 0.286293715 | -           |
| SRD5A2    | 6716   | 2446  | - | 0.091100852 | -           | -           |
| WFIKKN1   | 117166 | 1948  | - | 0.114390495 | 0.108462403 | 0.311748762 |
| GPT       | 2875   | 1896  | - | 0.352583362 | 0.222874221 | 0.106766278 |
| PDZRN3    | 23024  | 4161  | - | -           | 0.1015548   | -           |
| LOC64880  | 648809 | 1167  | - | -           | -           | 0.346921787 |
| IGSF9B    | 22997  | 7309  | - | 0.030487438 | -           | -           |
| FA2H      | 79152  | 2450  | - | -           | 0.086238678 | -           |
| PCDHB15   | 56121  | 2661  | - | -           | -           | 0.076072478 |
| CYP4Z2P   | 163720 | 2608  | - | 0.08544198  | -           | -           |
| CYCSP52   | 360155 | 310   | - | 0.718815112 | -           | 0.652996332 |
| C18orf32  | 497661 | 1505  | - | -           | 0.280777092 | -           |
| TREM2     | 54209  | 1059  | - | -           | -           | 0.191150957 |
| ITIH1     | 3697   | 2910  | - | 0.076574806 | 0.145212894 | 0.278252733 |
| PLEKHN1   | 84069  | 2404  | - | -           | -           | 0.421025089 |
| LIX1      | 167410 | 3979  | - | 0.112004365 | 0.053099965 | 0.050874306 |
| LINC00085 | 147650 | 2017  | - | -           | 0.209503978 | 0.10036136  |
| RND3      | 390    | 2683  | - | 0.083053554 | -           | 0.226346101 |
| USP44     | 84101  | 3476  | - | 0.192318197 | 0.060783878 | -           |
| TMC2      | 117532 | 3169  | - | 0.070316404 | -           | 0.127755672 |
| VSIG8     | 391123 | 1818  | - | 0.122570234 | 0.116218241 | 0.111347009 |
| LAMA3     | 3909   | 10511 | - | -           | 0.0201013   | 0.05777629  |
| GBP1P1    | 400759 | 1234  | - | 0.18057754  | -           | 12.13917006 |
| INSL3     | 3640   | 810   | - | -           | -           | 0.249912176 |
| DSCAML1   | 57453  | 6899  | - | -           | 0.030625418 | 0.029341769 |
| NHLRC1    | 378884 | 2134  | - | -           | 0.198017583 | 0.189717772 |
| CHRFAM7A  | 89832  | 2858  | - | 0.233904148 | 0.221782465 | 0.283315414 |
| MOGAT3    | 346606 | 1420  | - | 0.156924426 | 0.297584171 | -           |
| LIPF      | 8513   | 1537  | - | -           | 0.137465687 | -           |
| C5orf46   | 389336 | 587   | - | -           | -           | 0.344853259 |
| GSTT1     | 2952   | 1076  | - | -           | -           | 0.188130914 |
| IFLTD1    | 160492 | 1285  | - | 0.693642598 | 0.328847878 | 0.630128756 |
| MMP21     | 118856 | 1919  | - | -           | 0.110101491 | 0.10548664  |
| ATG9B     | 285973 | 4577  | - | -           | 0.092324563 | -           |
| DGKI      | 9162   | 4780  | - | -           | -           | 0.042349135 |
| KRT16P3   | 644945 | 2051  | - | -           | -           | 0.789581133 |
| NKAIN1    | 79570  | 2930  | - | -           | 0.07211084  | 0.690883491 |
| ACTN2     | 88     | 4528  | - | 0.049212165 | -           | 0.312942147 |
| CAMK1G    | 57172  | 2507  | - | -           | -           | 0.161490916 |
| DDX4      | 54514  | 2880  | - | 0.07737246  | -           | -           |
| RASGRF2   | 5924   | 4078  | - | 0.05464264  | 0.051810878 | -           |
| LGI2      | 55203  | 6339  | - | -           | -           | 0.03193388  |
| C13orf33  | 84935  | 2394  | - | -           | 0.088255957 | 0.084556751 |
| SECTM1    | 6398   | 2282  | - | -           | -           | 0.088706776 |
| MSMB      | 4477   | 503   | - | -           | -           | 0.402443068 |
| C12orf61  | 283416 | 1684  | - | 0.529293788 | 0.12546601  | -           |
| GPR174    | 84636  | 1258  | - | -           | -           | 0.160913246 |
| LOC10028  | 1E+08  | 1771  | - | 0.125823086 | -           | 0.114302012 |
| ATP5L2    | 267020 | 799   | - | 0.836668403 | 0.264436497 | 0.506705539 |
| SKAP1     | 8631   | 1601  | - | 0.139183438 | -           | 0.379317045 |
| TLX1      | 3195   | 2146  | - | -           | -           | 0.094328454 |
| C2orf89   | 129293 | 1733  | - | 0.257164091 | 0.1219185   | 0.116808346 |
| ANGPTL1   | 9068   | 3555  | - | -           | 0.178299377 | 1.822144477 |
| ENPP7     | 339221 | 1877  | - | -           | -           | 0.215694047 |
| TMPRSS11  | 401136 | 3202  | - | 0.069591719 | -           | 0.063219507 |
| C6orf105  | 84830  | 1866  | - | -           | 0.226457408 | -           |

|           |          |       |   |             |             |             |
|-----------|----------|-------|---|-------------|-------------|-------------|
| FIGF      | 2277     | 2084  | - | -           | -           | 0.097134771 |
| SNRPD2P2  | 645339   | 776   | - | 0.287155522 | -           | -           |
| LOC79015  | 79015    | 1157  | - | 0.385190466 | -           | 7.698245436 |
| POU5F2    | 134187   | 1295  | - | 0.172071571 | -           | -           |
| RAB34     | 83871    | 1785  | - | -           | 0.118366813 | -           |
| SCARNA2   | 677766   | 420   | - | -           | -           | 0.481973483 |
| AK7       | 122481   | 2672  | - | -           | -           | 0.075759305 |
| EPB42     | 2038     | 2554  | - | -           | 0.082727001 | 0.079259539 |
| C5orf60   | 285679   | 1210  | - | -           | 0.174615505 | -           |
| DPYSL4    | 10570    | 2732  | - | -           | 0.077337028 | -           |
| GNLY      | 10578    | 995   | - | -           | -           | 1.017230467 |
| KRT79     | 338785   | 2144  | - | 0.20786631  | 0.098546997 | 0.944164473 |
| AGPHD1    | 123688   | 1235  | - | 0.541293971 | -           | -           |
| ANKRD5    | 63926    | 3839  | - | 0.058044461 | -           | 0.052729581 |
| P4HTM     | 54681    | 2294  | - | 0.097137177 | -           | -           |
| NAV2      | 89797    | 11020 | - | -           | -           | 0.018369225 |
| MYL10     | 93408    | 1043  | - | 0.213645911 | -           | 0.582249846 |
| LOC10013  | 1E+08    | 1573  | - | 0.141660957 | -           | -           |
| TP53AIP1  | 63970    | 1278  | - | -           | -           | 0.158395041 |
| GDPD2     | 54857    | 2443  | - | 0.182425448 | -           | 0.082860771 |
| C10orf99  | 387695   | 835   | - | 0.266865491 | 1.012142569 | -           |
| TJP3      | 27134    | 2859  | - | -           | 0.221704891 | 2.761359096 |
| OR9A4     | 130075   | 945   | - | 0.235801783 | 0.223581758 | 0.428420874 |
| LOC40064  | 400643   | 1751  | - | -           | -           | 0.115607575 |
| PIWIL3    | 440822   | 3504  | - | 0.063593803 | 0.120596325 | 0.231083177 |
| CTDSPL    | 10217    | 4455  | - | 0.05001856  | -           | -           |
| GBX1      | 2636     | 1324  | - | 0.168302632 | -           | 0.15289189  |
| SFRP5     | 6425     | 1883  | - | 0.118339185 | -           | -           |
| HYDIN     | 54768    | 3152  | - | -           | 0.067031967 | -           |
| ZNF415    | 55786    | 2545  | - | -           | 0.083019553 | -           |
| LOC10013  | 1E+08    | 2579  | - | -           | -           | 0.078491223 |
| TMPRSS13  | 84000    | 3462  | - | 0.128730609 | -           | 0.467773225 |
| LOC10050  | 1.01E+08 | 994   | - | 0.224177751 | -           | 0.203650768 |
| CNGA1     | 1259     | 2872  | - | 0.543115875 | 0.073567117 | 0.140967175 |
| PROM1     | 8842     | 4257  | - | 0.104690009 | -           | -           |
| ROR1      | 4919     | 3382  | - | 0.131775686 | -           | -           |
| COL14A1   | 7373     | 6463  | - | -           | 0.032691438 | -           |
| KCNS2     | 3788     | 3219  | - | 0.069224195 | -           | -           |
| ADCY2     | 108      | 6553  | - | 0.102014048 | 0.032242448 | 0.092673064 |
| DMKN      | 93099    | 1946  | - | 0.11450806  | -           | 0.416092216 |
| C8orf42   | 157695   | 1885  | - | -           | -           | 0.107389317 |
| P4HA2     | 8974     | 2588  | - | -           | 0.163280341 | 0.156436525 |
| MFI2      | 4241     | 3963  | - | 0.955880808 | 0.053314348 | 0.715115842 |
| AWAT2     | 158835   | 2124  | - | -           | 0.099474935 | -           |
| PRSS56    | 646960   | 2158  | - | -           | -           | 0.093803922 |
| FERMT2    | 10979    | 3372  | - | -           | 0.187975766 | 0.060032284 |
| CYP4F2    | 8529     | 2360  | - | -           | -           | 0.171549884 |
| SLC45A2   | 51151    | 2769  | - | -           | 0.152607267 | -           |
| LINC00319 | 284836   | 3015  | - | -           | 0.070077864 | -           |
| DTX1      | 1840     | 3317  | - | -           | 0.191092639 | 0.427193862 |
| SNCAIP    | 9627     | 3569  | - | 0.124871216 | -           | -           |
| LOC10012  | 1E+08    | 2012  | - | 0.110751831 | -           | -           |
| MOXD1     | 26002    | 3039  | - | 0.073324345 | -           | 0.133220706 |
| HLA-DMB   | 3109     | 1412  | - | -           | -           | 0.57345287  |
| DNAAF1    | 123872   | 2451  | - | 0.090915008 | -           | 2.064757884 |
| CDH5      | 1003     | 4134  | - | -           | -           | 0.146900481 |
| VPREB3    | 29802    | 602   | - | -           | -           | 0.33626057  |
| MYH6      | 4624     | 5941  | - | -           | -           | 0.034073197 |
| CRB3      | 92359    | 1118  | - | 0.398627343 | 0.377969162 | -           |
| EXTL1     | 2134     | 4021  | - | 0.055417231 | -           | 0.201371662 |
| CACNA1I   | 8911     | 10007 | - | -           | 0.021113697 | 0.566404333 |
| PTGR1     | 22949    | 1409  | - | 0.158149528 | -           | -           |

|           |          |       |   |             |             |             |
|-----------|----------|-------|---|-------------|-------------|-------------|
| MAFA      | 389692   | 2373  | - | 0.18780673  | 0.089036983 | 0.511830248 |
| TBC1D26   | 353149   | 1883  | - | -           | 0.224412917 | -           |
| C6orf145  | 221749   | 2211  | - | -           | 0.095560724 | 0.274666028 |
| CYP2A7    | 1549     | 2281  | - | 0.195381574 | 0.185256257 | 0.088745665 |
| ENPP2     | 5168     | 3276  | - | -           | 0.064494738 | 1.544786805 |
| HIST1H3B  | 8358     | 472   | - | 1.416309437 | -           | -           |
| RFX4      | 5992     | 3965  | - | -           | 0.053287456 | -           |
| PRSS8     | 5652     | 1940  | - | 0.114862209 | -           | 0.626068648 |
| PLGLB1    | 5343     | 3011  | - | -           | 0.07017096  | -           |
| AKR1C1    | 1645     | 1384  | - | -           | -           | 0.292527259 |
| LIPG      | 9388     | 4143  | - | -           | -           | 0.048860454 |
| PLBD1     | 79887    | 1951  | - | -           | -           | 0.103756465 |
| DUOX2     | 50506    | 6428  | - | 0.034665943 | -           | 0.094475201 |
| CLDN19    | 149461   | 3602  | - | 0.123727199 | 0.175972872 | 0.056199018 |
| BMP6      | 654      | 3105  | - | -           | 0.068046622 | -           |
| SCARNA11  | 677780   | 137   | - | -           | 1.542224535 | -           |
| GIMAP4    | 55303    | 1983  | - | 0.1123715   | -           | 6.839502682 |
| MATN1     | 4146     | 3830  | - | -           | -           | 0.052853489 |
| MECOM     | 2122     | 5740  | - | 0.698778454 | -           | 0.211598115 |
| KRTAP5-7  | 440050   | 898   | - | 0.248143301 | 0.235283699 | -           |
| FAM205A   | 259308   | 4311  | - | -           | -           | 0.046956359 |
| HEPH      | 9843     | 4509  | - | 0.049419535 | 0.046858452 | 0.583627239 |
| XKR7      | 343702   | 2929  | - | -           | 0.07213546  | 0.069111937 |
| C11orf34  | 349633   | 1541  | - | 0.144602651 | -           | -           |
| PCDHGB1   | 56104    | 4590  | - | -           | -           | 0.088204298 |
| C9orf106  | 414318   | 843   | - | -           | -           | 0.480258275 |
| LOC10050  | 1.01E+08 | 2191  | - | 0.305110933 | -           | -           |
| VN1R1     | 57191    | 1566  | - | 0.284588359 | 0.404760079 | -           |
| SPATA12   | 353324   | 2430  | - | -           | 0.347793846 | 0.249912176 |
| IFNA14    | 3448     | 778   | - | -           | -           | 0.260191341 |
| LOC10013  | 1E+08    | 1858  | - | -           | -           | 0.108949872 |
| BMX       | 660      | 2592  | - | 0.1719388   | 0.489085096 | 1.093365772 |
| CBS       | 875      | 2609  | - | 0.085409231 | -           | -           |
| C11orf85  | 283129   | 843   | - | -           | -           | 0.480258275 |
| PLAC1     | 10761    | 1126  | - | 0.395795177 | 0.375283768 | 0.179776965 |
| TRIM50    | 135892   | 2047  | - | 0.108858175 | -           | -           |
| GPR18     | 2841     | 1676  | - | 0.132955062 | 0.126064893 | 0.845466611 |
| PTCHD3    | 374308   | 2528  | - | 0.08814584  | -           | -           |
| ARHGEF37  | 389337   | 4865  | - | 0.045803224 | 0.04342955  | 0.083218443 |
| COL1A1    | 1277     | 5927  | - | -           | -           | 0.170768401 |
| LOC72864  | 728643   | 542   | - | -           | 0.389824283 | 0.373484987 |
| AGRP      | 181      | 783   | - | 0.284588359 | -           | -           |
| SCNN1A    | 6337     | 3497  | - | 0.254884398 | -           | 0.405205045 |
| HDAC9     | 9734     | 4463  | - | 0.049928901 | -           | -           |
| FBLN1     | 2192     | 2485  | - | 0.0896711   | 0.085024049 | 0.325841228 |
| UPK1A     | 11045    | 1223  | - | -           | -           | 0.165518285 |
| C7orf63   | 79846    | 3909  | - | -           | 0.054050847 | -           |
| NKAPP1    | 158801   | 2434  | - | 0.091549994 | -           | -           |
| CNTD2     | 79935    | 1817  | - | -           | 0.116282202 | -           |
| CACHD1    | 57685    | 5274  | - | 0.042251173 | -           | 0.038382416 |
| OR6M1     | 390261   | 942   | - | 0.236552744 | -           | -           |
| SRPX      | 8406     | 1920  | - | -           | 0.110044147 | -           |
| HIST1H4D  | 8360     | 367   | - | -           | 1.151415593 | -           |
| PAK6      | 56924    | 3939  | - | -           | 0.053639188 | -           |
| HIST1H2AK | 8330     | 460   | - | -           | -           | 0.880125491 |
| HPD       | 3242     | 1916  | - | 1.163009837 | 0.330821651 | 1.690428918 |
| CACNA1C   | 775      | 13603 | - | 0.016381143 | -           | -           |
| CD3E      | 916      | 1534  | - | 0.145262506 | -           | 0.131961449 |
| SPACA4    | 171169   | 978   | - | -           | 0.648112765 | -           |
| FRMPD1    | 22844    | 4933  | - | -           | -           | 0.04103565  |
| BCAR4     | 400500   | 1314  | - | -           | 0.1607951   | -           |
| GPA33     | 10223    | 2793  | - | 1.834998836 | 0.075647963 | 0.217431647 |

|           |        |       |   |             |             |             |
|-----------|--------|-------|---|-------------|-------------|-------------|
| LOC400084 | 400084 | 2092  | - | 0.10651658  | -           | -           |
| SERF1A    | 8293   | 1935  | - | 0.11515901  | -           | -           |
| IL26      | 55801  | 1047  | - | 0.212829689 | -           | -           |
| TTC23L    | 153657 | 1369  | - | -           | 0.308670214 | -           |
| C6orf132  | 647024 | 6742  | - | 0.066102843 | 0.156692941 | 0.090075139 |
| SLC9A2    | 6549   | 5446  | - | 0.040916762 | -           | -           |
| LOC285548 | 285548 | 1749  | - | 0.127405766 | -           | -           |
| KNDC1     | 85442  | 6773  | - | 0.065800291 | 0.031195152 | 0.089662866 |
| LIPM      | 340654 | 1484  | - | 0.150156796 | -           | -           |
| ARSD      | 414    | 2236  | - | 0.199313672 | -           | -           |
| CCDC148   | 130940 | 1447  | - | -           | 0.29203146  | -           |
| MUC5B     | 727897 | 17916 | - | -           | -           | 0.011298776 |
| DOK7      | 285489 | 2583  | - | 0.776420504 | 0.245394612 | 0.548587704 |
| LOC400680 | 400680 | 3760  | - | 0.059264012 | -           | 0.053837464 |
| CD1C      | 911    | 2592  | - | -           | -           | 0.078097555 |
| CCL26     | 10344  | 562   | - | 0.396499439 | -           | 0.720387413 |
| MMP10     | 4319   | 1777  | - | -           | 0.237799394 | 0.113916074 |
| GATA6     | 2627   | 3494  | - | 0.191327434 | -           | 0.173808411 |
| VSNL1     | 7447   | 2014  | - | 0.110641849 | -           | 0.100510855 |
| SYT17     | 51760  | 1912  | - | -           | -           | 0.105872836 |
| PLK5      | 126520 | 1928  | - | 0.115577119 | -           | -           |
| AQP9      | 366    | 3033  | - | 7.200001024 | 0.278647888 | 160.7150353 |
| GDF7      | 151449 | 1994  | - | -           | 0.105960261 | -           |
| IL2RA     | 3559   | 3216  | - | 0.277155081 | 0.065697998 | 4.657878066 |
| SLC34A2   | 10568  | 4187  | - | -           | 0.050462088 | -           |
| CAMK4     | 814    | 2272  | - | 0.098077766 | -           | -           |
| TAS1R1    | 80835  | 2803  | - | 0.079497925 | -           | -           |
| TEKT3     | 64518  | 1795  | - | -           | 0.117707388 | 0.563868699 |
| SNX32     | 254122 | 1719  | - | -           | -           | 0.117759664 |
| FAIM3     | 9214   | 3109  | - | 0.143346854 | 0.067959074 | 1.692875663 |
| TRIML2    | 205860 | 1300  | - | -           | -           | 0.15571451  |
| FOLR2     | 2350   | 1145  | - | 0.194613698 | -           | -           |
| LOC729170 | 729176 | 2156  | - | 0.103354678 | -           | -           |
| ANO9      | 338440 | 2879  | - | 0.077399335 | -           | 0.140624427 |
| FAM162B   | 221303 | 1050  | - | -           | -           | 2.120683326 |
| NLRP6     | 171389 | 2679  | - | -           | 0.078867026 | 0.075561352 |
| CHST15    | 51363  | 4803  | - | 1.159861986 | -           | 2.865951006 |
| ABCC6P1   | 653190 | 2740  | - | -           | 0.077111227 | 0.295516588 |
| C19orf69  | 1E+08  | 946   | - | -           | -           | 0.641951997 |
| ARHGEF10  | 55160  | 4502  | - | -           | 0.046931311 | 0.044964208 |
| CLDN25    | 644672 | 690   | - | -           | 0.306209799 | -           |
| IFNA13    | 3447   | 705   | - | -           | -           | 0.861399417 |
| CDHR2     | 54825  | 4313  | - | 0.103330714 | -           | -           |
| COBL      | 23242  | 5326  | - | -           | -           | 0.152030689 |
| IL13      | 3596   | 1282  | - | -           | -           | 0.157900829 |
| USP27X    | 389856 | 2714  | - | 0.16420979  | 0.233549847 | 0.149173812 |
| OTOA      | 146183 | 3624  | - | 0.061488048 | -           | -           |
| LOC100133 | 1E+08  | 2282  | - | -           | -           | 0.088706776 |
| CAP2      | 10486  | 3080  | - | 0.072348274 | 0.068598948 | 0.065723657 |
| LOC388906 | 388906 | 1256  | - | 0.354829116 | 0.336440703 | -           |
| NECAB2    | 54550  | 1636  | - | -           | -           | 0.247468048 |
| MMP13     | 4322   | 2735  | - | -           | -           | 0.074014209 |
| LINC00310 | 114036 | 1269  | - | 0.702388289 | 0.332994108 | 0.638073642 |
| ADCY5     | 111    | 6098  | - | -           | -           | 0.066391887 |
| LOC100130 | 1E+08  | 512   | - | -           | -           | 0.395368873 |
| CNGB1     | 1258   | 1648  | - | 0.676070039 | -           | -           |
| TNFRSF11A | 8792   | 3133  | - | 0.071124381 | 0.067438481 | 0.06461183  |
| C10orf27  | 219793 | 1583  | - | -           | -           | 0.383630189 |
| APOC2     | 344    | 738   | - | -           | 0.286293715 | -           |
| TRNP1     | 388610 | 1949  | - | 0.114331803 | 0.216813506 | 0.311588809 |
| ACPT      | 93650  | 1347  | - | -           | 0.470567397 | -           |
| TMEM89    | 440955 | 480   | - | -           | -           | 0.421726798 |

|          |        |       |   |             |             |             |
|----------|--------|-------|---|-------------|-------------|-------------|
| EMBP1    | 647121 | 4231  | - | -           | 0.049937311 | -           |
| NRN1L    | 123904 | 633   | - | 0.352026358 | -           | 0.639585665 |
| SPINK4   | 27290  | 386   | - | 1.154573496 | -           | -           |
| KRTAP5-8 | 57830  | 1198  | - | 0.372007821 | -           | 0.16897234  |
| VIL1     | 7429   | 2759  | - | -           | 0.076580196 | -           |
| LOC64410 | 644100 | 642   | - | 43.03933475 | -           | 110.0431046 |
| MLXIPL   | 51085  | 3288  | - | 1.287658458 | -           | 5.971897721 |
| SLC26A10 | 65012  | 2446  | - | -           | -           | 0.082759143 |
| CLIC5    | 53405  | 5988  | - | -           | -           | 0.270446043 |
| SLC10A6  | 345274 | 1502  | - | -           | 0.140668949 | -           |
| C7orf45  | 136263 | 1171  | - | 0.190292643 | -           | 0.172868371 |
| BAIAP2L1 | 55971  | 3682  | - | 0.121038938 | 0.114766302 | 0.219911855 |
| PCDHB10  | 56126  | 3284  | - | 0.067854045 | -           | 0.12328189  |
| KLRB1    | 3820   | 740   | - | 0.602250499 | 0.285519948 | 0.547105035 |
| AMOT     | 154796 | 6945  | - | 0.03208534  | -           | -           |
| LRRC10B  | 390205 | 2230  | - | -           | -           | 0.090775275 |
| ZMYND15  | 84225  | 2347  | - | 0.189887247 | 0.090023332 | -           |
| LOC55310 | 553103 | 1801  | - | 0.371181596 | 0.117315248 | 0.224796072 |
| OR2B6    | 26212  | 942   | - | 0.236552744 | 0.448587604 | 0.429785272 |
| ECEL1P2  | 347694 | 1309  | - | -           | 0.161409291 | -           |
| C7orf71  | 285941 | 1991  | - | 0.111919982 | 0.10611992  | -           |
| LOC10027 | 1E+08  | 1392  | - | -           | -           | 0.145423034 |
| CTAGE1   | 64693  | 4315  | - | -           | 0.097930364 | -           |
| NPR1     | 4881   | 4201  | - | -           | 0.100587842 | -           |
| CHRN4    | 1143   | 2448  | - | 0.091026424 | -           | 0.248074587 |
| HCN2     | 610    | 3459  | - | -           | 0.122165228 | 0.058522366 |
| C22orf43 | 51233  | 1336  | - | 0.166790932 | -           | 0.30303722  |
| ABCC12   | 94160  | 5168  | - | 0.04311778  | -           | -           |
| ADORA1   | 134    | 2937  | - | 0.075870849 | -           | -           |
| FCRL6    | 343413 | 1943  | - | -           | -           | 0.208367332 |
| CXCR6    | 10663  | 1953  | - | 0.114097637 | 0.108184722 | 0.103650211 |
| FLJ37505 | 400087 | 2020  | - | 0.11031321  | -           | -           |
| MAR10    | 162333 | 3116  | - | -           | -           | 0.064964333 |
| DNAH8    | 1769   | 14639 | - | -           | 0.014433005 | 0.027656105 |
| CYP3A43  | 64816  | 2167  | - | 0.102830034 | 0.097501044 | -           |
| TRIM15   | 89870  | 2241  | - | -           | 0.094281464 | -           |
| CASP14   | 23581  | 3153  | - | 0.141346454 | 0.067010708 | -           |
| TDRG1    | 732253 | 1197  | - | -           | 0.176511914 | 0.169113503 |
| CHRNA1   | 1134   | 2094  | - | -           | -           | 0.193341798 |
| NPB      | 256933 | 634   | - | 0.702942223 | 0.666513443 | -           |
| SGSH     | 6448   | 2770  | - | -           | 0.076276087 | 0.073079012 |
| CXorf58  | 254158 | 1547  | - | 0.144041813 | -           | 0.261705059 |
| ADH1C    | 126    | 1497  | - | 0.297705658 | -           | -           |
| GCOM1    | 145781 | 4676  | - | -           | 0.045184936 | -           |
| HKDC1    | 80201  | 3719  | - | -           | 0.170436753 | -           |
| RSPH9    | 221421 | 1014  | - | 0.439512199 | 0.208367615 | 0.199633987 |
| FBXO15   | 201456 | 1767  | - | 0.126107914 | -           | 0.22912152  |
| TULP2    | 7288   | 1791  | - | -           | 0.117970274 | -           |
| KIR2DL1  | 3802   | 1598  | - | -           | 0.132218249 | 0.126676385 |
| OPRM1    | 4988   | 2569  | - | -           | -           | 0.078796755 |
| MEIG1    | 644890 | 638   | - | -           | -           | 0.317286619 |
| ZNF366   | 167465 | 2770  | - | -           | 0.076276087 | 7.527138225 |
| LOC40198 | 401980 | 1873  | - | 0.118971001 | -           | 0.108077343 |
| FBLN2    | 2199   | 4591  | - | -           | 0.046021512 | -           |
| CYP27A1  | 1593   | 2388  | - | 0.653194637 | 0.353910823 | 1.525845701 |
| MCART3P  | 442229 | 1605  | - | -           | -           | 0.126123902 |
| CGREF1   | 10669  | 1408  | - | 1.74088035  | 0.900361199 | 1.150163994 |
| LOC28574 | 285740 | 1915  | - | 0.349085146 | 0.110331468 | 0.422827912 |
| EXOC3L4  | 91828  | 2591  | - | -           | -           | 0.156255394 |
| FLJ31485 | 440119 | 3678  | - | 0.121170574 | 0.172336673 | 0.22015102  |
| LRRC26   | 389816 | 1212  | - | -           | 0.174327361 | -           |
| FANK1    | 92565  | 1395  | - | 0.159736692 | 0.605834441 | 0.145110296 |

|           |        |      |   |             |             |             |
|-----------|--------|------|---|-------------|-------------|-------------|
| MRAP2     | 112609 | 2229 | - | -           | -           | 0.090816    |
| SPIB      | 6689   | 1493 | - | 0.149251631 | -           | 0.40675592  |
| LOC100270 | 1E+08  | 954  | - | 0.467154475 | 0.885889985 | -           |
| SERPIND1  | 3053   | 2237 | - | 0.099612286 | -           | 0.090491222 |
| CNGA4     | 1262   | 1911 | - | -           | -           | 0.211856476 |
| SCN8A     | 6334   | 7215 | - | 0.030884641 | 0.029284097 | 0.112226674 |
| TDRD1     | 56165  | 4510 | - | 0.049408578 | 0.093696125 | 0.089768897 |
| ERAS      | 3266   | 1266 | - | 0.176013179 | 0.333783193 | -           |
| MTRNR2L7  | 1E+08  | 1494 | - | -           | -           | 0.135494554 |
| C14orf70  | 283601 | 1627 | - | 0.136959241 | -           | -           |
| TULP1     | 7287   | 2107 | - | -           | 0.100277533 | -           |
| KCNC1     | 3746   | 3134 | - | -           | 0.067416963 | -           |
| DAPK1     | 1612   | 5942 | - | 0.300010346 | 0.035557853 | 1.567103281 |
| FCGR3B    | 2215   | 2300 | - | -           | -           | 13.11386982 |
| KCP       | 375616 | 4733 | - | -           | 0.133922308 | 0.128309019 |
| TBC1D3H   | 729877 | 2305 | - | -           | -           | 0.087821633 |
| IFNB1     | 3456   | 840  | - | -           | -           | 3.614801124 |
| RUNX1T1   | 862    | 7769 | - | 0.028682287 | -           | 0.026055974 |
| C9orf171  | 389799 | 1789 | - | 0.249114237 | -           | -           |
| MMP7      | 4316   | 1147 | - | -           | -           | 6.176992331 |
| ASPDH     | 554235 | 1061 | - | -           | -           | 0.190790634 |
| BAIAP2L2  | 80115  | 2153 | - | -           | 0.098135049 | -           |
| CAMP      | 820    | 739  | - | 0.301532726 | -           | 3.834917566 |
| ARL4D     | 379    | 1602 | - | -           | 0.263776231 | 0.252720178 |
| LOC147640 | 147646 | 1403 | - | 0.158825862 | 0.150594983 | 0.432848602 |
| C17orf107 | 1E+08  | 3099 | - | 0.071904706 | -           | -           |
| KCNJ10    | 3766   | 5323 | - | 0.125586709 | 0.039692798 | 0.038029093 |
| PLN       | 5350   | 1742 | - | 0.127917729 | -           | 0.232409716 |
| RNF183    | 138065 | 1237 | - | -           | -           | 0.163644998 |
| PKD2L1    | 9033   | 3060 | - | 0.436926833 | -           | 2.91074182  |
| PLSCR2    | 57047  | 1215 | - | -           | 0.173896923 | -           |
| PGLYRP1   | 8993   | 972  | - | 0.458503467 | 1.086855768 | 0.624780441 |
| AXIN2     | 8313   | 4241 | - | -           | -           | 0.047731399 |
| PRRG2     | 5639   | 1411 | - | 0.157925361 | 0.598964596 | 0.860788928 |
| GZMM      | 3004   | 947  | - | -           | 0.223109568 | -           |
| PKNOX2    | 63876  | 3730 | - | -           | -           | 0.162811418 |
| ULBP1     | 80329  | 3160 | - | -           | 0.334311331 | 0.064059767 |
| PPFIA4    | 8497   | 5055 | - | 6.347756005 | 0.12539155  | 5.366066792 |
| LOC283038 | 283038 | 3149 | - | 0.070762999 | -           | -           |
| ANKS1B    | 56899  | 3695 | - | -           | 0.114362523 | -           |
| ASCL2     | 430    | 1864 | - | -           | 0.226700388 | 0.325797526 |
| SYBU      | 55638  | 3251 | - | -           | -           | 0.062266645 |
| LOC341050 | 341056 | 2046 | - | 0.217822761 | 0.206534469 | -           |
| SCO2      | 9997   | 1051 | - | -           | -           | 1.348241713 |
| PGA5      | 5222   | 1398 | - | 0.796969545 | -           | 0.289597801 |
| TDO2      | 6999   | 1713 | - | -           | -           | 0.827204927 |
| LOC386758 | 386758 | 1691 | - | 0.527102743 | 0.124946636 | 0.478838233 |
| PCDHB17   | 54661  | 2411 | - | -           | 0.087633663 | -           |
| LOC731650 | 731656 | 995  | - | -           | 0.212346494 | -           |
| TMEM88    | 92162  | 887  | - | 0.753661842 | -           | 0.912869731 |
| C20orf106 | 200232 | 689  | - | 0.646829274 | 0.306654225 | 0.293800962 |
| IHH       | 3549   | 2074 | - | -           | 0.101873077 | -           |
| KRT6A     | 3853   | 2450 | - | -           | -           | 0.165248051 |
| ARHGEF33  | 1E+08  | 4316 | - | -           | 0.048953837 | -           |
| C19orf51  | 352909 | 2210 | - | -           | 0.573623787 | 0.091596771 |
| LRRC10    | 376132 | 2649 | - | 0.168239098 | -           | 0.076417087 |
| EFNA2     | 1943   | 642  | - | 0.347091409 | -           | -           |
| ZNF890P   | 645700 | 1614 | - | 0.276124764 | -           | 0.125420609 |
| LRRN1     | 57633  | 3823 | - | -           | 0.110533488 | -           |
| TTYH1     | 57348  | 1924 | - | -           | 0.109815365 | 0.210425013 |
| GYG2P1    | 352887 | 824  | - | -           | -           | 0.245666096 |
| ALMS1P    | 200420 | 1608 | - | 0.277155081 | 0.131395996 | 2.643660524 |

|          |          |      |   |             |             |             |
|----------|----------|------|---|-------------|-------------|-------------|
| GPR133   | 283383   | 5392 | - | -           | 0.039184859 | -           |
| LOC38970 | 389705   | 932  | - | -           | -           | 0.217198351 |
| MYO7B    | 4648     | 6715 | - | 0.298658848 | 0.062929192 | 2.863848396 |
| PZP      | 5858     | 4615 | - | 0.048284439 | -           | 0.043863242 |
| SYT9     | 143425   | 3958 | - | -           | -           | 0.05114423  |
| IGSF1    | 3547     | 4599 | - | -           | -           | 0.088031686 |
| C21orf81 | 391267   | 1095 | - | 0.203500169 | 0.19295412  | -           |
| LOC10050 | 1.01E+08 | 2531 | - | 0.528248166 | -           | 2.159454484 |
| ARC      | 23237    | 2985 | - | -           | -           | 0.067815364 |
| TIMP4    | 7079     | 1667 | - | -           | -           | 0.121433031 |
| EPHA3    | 2042     | 2684 | - | -           | -           | 0.226261769 |
| FAM182B  | 728882   | 5481 | - | 0.04065548  | -           | -           |
| AOX2P    | 344454   | 3738 | - | 0.178838431 | 0.056523478 | 0.054154324 |
| DNAJC5G  | 285126   | 2006 | - | 0.111083093 | 0.105326401 | -           |
| ERBB3    | 2065     | 5765 | - | 0.309221419 | 0.21989741  | -           |
| CEACAM4  | 1089     | 1205 | - | 0.36984678  | -           | 0.167990758 |
| FN3K     | 64122    | 1433 | - | -           | -           | 0.141262291 |
| PRSS33   | 260429   | 1694 | - | 0.131542317 | -           | 2.031458483 |
| FLJ42393 | 401105   | 2266 | - | 0.09833746  | 0.279723868 | 0.089333126 |
| PCDHGB7  | 56099    | 4765 | - | 0.187057868 | -           | -           |
| EPB41L3  | 23136    | 4446 | - | 0.100239624 | 0.142567315 | 0.273183351 |
| PCDHGB8P | 56120    | 1973 | - | -           | -           | 0.102599525 |
| LOC10012 | 1E+08    | 1819 | - | 0.12250285  | -           | -           |
| BIRC7    | 79444    | 1322 | - | -           | -           | 0.306246389 |
| CDKL4    | 344387   | 1567 | - | 0.142203373 | -           | -           |
| NEURL    | 9148     | 4315 | - | -           | 0.146895547 | -           |
| GFPT2    | 9945     | 3011 | - | -           | 0.07017096  | -           |
| ADAL     | 161823   | 1627 | - | -           | -           | 0.124418478 |
| C2orf70  | 339778   | 695  | - | -           | 0.304006851 | -           |
| PLSCR2   | 57047    | 1598 | - | -           | -           | 0.380029154 |
| FAM169B  | 283777   | 3298 | - | 0.13513201  | -           | -           |
| LOC44145 | 441455   | 1647 | - | 0.135296105 | -           | 0.122907628 |
| PAX2     | 5076     | 4137 | - | -           | -           | 0.24465659  |
| PRB4     | 5545     | 944  | - | -           | -           | 0.42887471  |
| XIRP1    | 165904   | 6451 | - | -           | 0.032752249 | -           |
| LOC28434 | 284344   | 1721 | - | -           | -           | 0.117622814 |
| APOL5    | 80831    | 1438 | - | 0.154960142 | -           | -           |
| RGS22    | 26166    | 4184 | - | -           | 0.10099654  | -           |
| ZNF285   | 26974    | 2703 | - | -           | 0.078166763 | -           |
| OR56B1   | 387748   | 1091 | - | 0.408492548 | -           | 0.371088658 |
| OR7E5P   | 219445   | 1833 | - | 0.243134408 | 0.115267191 | -           |
| C3orf74  | 1E+08    | 3019 | - | 0.147620195 | 0.069985015 | 0.201154882 |
| ENPEP    | 2028     | 5004 | - | -           | -           | 0.08090682  |
| CACNA1B  | 774      | 9790 | - | -           | 0.021581692 | -           |
| OR1J1    | 347168   | 969  | - | -           | -           | 0.417809831 |
| EMCN     | 51705    | 4047 | - | 0.110122404 | -           | -           |
| NEBL     | 10529    | 9231 | - | -           | -           | 0.043858491 |
| C14orf64 | 388011   | 1496 | - | -           | 0.282466259 | -           |
| FAM70A   | 55026    | 3512 | - | 0.063448942 | 0.060160809 | 0.057639198 |
| SLC6A14  | 11254    | 4564 | - | 0.097647978 | 0.092587538 | -           |
| MTNR1B   | 4544     | 1662 | - | 0.134075021 | -           | -           |
| MADCAM1  | 8174     | 1546 | - | -           | 0.136665434 | -           |
| HECW1    | 23072    | 6839 | - | -           | -           | 0.02959919  |
| FCRL1    | 115350   | 3116 | - | 0.071512415 | -           | 0.194893    |
| DKFZp686 | 401613   | 4612 | - | 0.048315847 | -           | -           |
| RASL12   | 51285    | 2603 | - | -           | 0.081169712 | -           |
| ELF5     | 2001     | 2466 | - | 0.090361997 | -           | -           |
| LOC64662 | 646627   | 1205 | - | 0.36984678  | -           | -           |
| HLA-F    | 3134     | 1591 | - | -           | -           | 0.127233729 |
| TSPY26P  | 128854   | 1215 | - | 0.183401387 | 0.173896923 | 0.499824353 |
| LOC10049 | 1E+08    | 2516 | - | -           | -           | 0.080456623 |
| LOC64365 | 643650   | 2877 | - | -           | 0.073439264 | 0.070361092 |

|           |          |       |   |             |             |             |
|-----------|----------|-------|---|-------------|-------------|-------------|
| RNASE8    | 122665   | 465   | - | -           | 0.454375831 | -           |
| ALAS2     | 212      | 2044  | - | -           | -           | 0.198071294 |
| ENTPD8    | 377841   | 2222  | - | -           | -           | 0.091102099 |
| KGFLP1    | 387628   | 3612  | - | 0.061692327 | 0.116990455 | 0.056043428 |
| TMEM132   | 124842   | 4369  | - | -           | -           | 0.046332997 |
| MYH4      | 4622     | 6016  | - | -           | -           | 0.033648415 |
| CHI3L2    | 1117     | 1516  | - | 0.146987259 | -           | -           |
| SGK3      | 23678    | 4110  | - | 0.054217198 | -           | -           |
| LRRC48    | 83450    | 2183  | - | -           | 0.483932115 | 0.370918668 |
| HSPA6     | 3310     | 2664  | - | 0.167291805 | 0.396555483 | 0.607894483 |
| PSCA      | 8000     | 1191  | - | 0.187097132 | -           | -           |
| HUS1B     | 135458   | 1026  | - | -           | 0.205930567 | -           |
| NKX2-8    | 26257    | 1857  | - | 0.239992121 | -           | -           |
| LOC38789  | 387895   | 621   | - | -           | 0.34023311  | -           |
| CXCR2P1   | 3580     | 2153  | - | -           | -           | 0.376087065 |
| LOC10062  | 1.01E+08 | 1625  | - | -           | -           | 0.124571608 |
| CDRT15L2  | 256223   | 1051  | - | -           | -           | 0.192605959 |
| DDAH1     | 23576    | 4023  | - | 0.221558722 | 0.052519205 | 0.150953664 |
| PI15      | 51050    | 6732  | - | 0.033100518 | -           | -           |
| C1orf204  | 284677   | 2501  | - | -           | -           | 0.08093917  |
| HOXD12    | 3238     | 813   | - | 0.274086943 | -           | 0.248989991 |
| RNU2-2    | 26855    | 138   | - | 1.6147296   | -           | -           |
| GABRA4    | 2557     | 11987 | - | -           | -           | 0.016887367 |
| CXorf48   | 54967    | 2188  | - | -           | -           | 0.092517762 |
| NAT8B     | 51471    | 845   | - | -           | -           | 0.479121569 |
| ZNF385B   | 151126   | 3320  | - | -           | -           | 0.060972549 |
| SYS1-DBN  | 767557   | 1344  | - | 0.165798129 | -           | 0.150616714 |
| CTAGE6P   | 340307   | 2675  | - | 0.083301938 | -           | -           |
| TIMD4     | 91937    | 1374  | - | -           | 0.15377348  | 0.147328139 |
| ORM2      | 5005     | 844   | - | 1.320098843 | -           | 5.996115609 |
| CTXN3     | 613212   | 1683  | - | -           | -           | 0.120278588 |
| PTGER2    | 5732     | 2494  | - | -           | -           | 0.081166344 |
| KRT32     | 3882     | 2005  | - | -           | -           | 0.100962026 |
| SLAMF1    | 6504     | 2009  | - | -           | 0.10516912  | 0.403044028 |
| TPPP3     | 51673    | 1146  | - | 1.555551028 | -           | 0.529918489 |
| GPRC6A    | 222545   | 2860  | - | -           | -           | 0.070779323 |
| APOA1     | 335      | 897   | - | -           | 0.235545999 | -           |
| PAX5      | 5079     | 3650  | - | -           | -           | 0.998279324 |
| MMP23B    | 8510     | 1246  | - | 0.178838431 | 0.169570434 | 0.162462972 |
| ZNF559-ZN | 1.01E+08 | 2564  | - | -           | 0.082404353 | -           |
| ASB9      | 140462   | 1962  | - | -           | -           | 0.103174752 |
| SLCO2B1   | 11309    | 4362  | - | -           | 0.048437589 | 0.278444103 |
| BARX2     | 8538     | 1767  | - | 0.252215829 | -           | -           |
| ALPK2     | 115701   | 7303  | - | -           | -           | 0.02771859  |
| NPW       | 283869   | 1033  | - | 0.431428238 | 0.204535103 | 0.391924226 |
| HEPHL1    | 341208   | 5951  | - | -           | -           | 0.034015941 |
| IL27      | 246778   | 1044  | - | -           | -           | 0.969486892 |
| C20orf46  | 55321    | 1720  | - | -           | 0.122839978 | -           |
| SOX10     | 6663     | 2882  | - | -           | -           | 0.070239023 |
| RLBP1     | 6017     | 1752  | - | -           | -           | 0.115541588 |
| CCDC152   | 1E+08    | 3491  | - | -           | 0.060522704 | -           |
| GALNTL6   | 442117   | 2850  | - | -           | -           | 0.071027671 |
| SYN1      | 6853     | 3210  | - | 0.485927973 | -           | 1.072053168 |
| ST7-OT4   | 338069   | 1589  | - | 0.14023454  | 0.132967125 | -           |
| TDRD9     | 122402   | 4782  | - | 0.139794658 | -           | 1.142948411 |
| JMJD7-PLA | 8681     | 3379  | - | -           | 0.062528784 | -           |
| PRSS3     | 5646     | 1160  | - | -           | -           | 0.349015281 |
| RNY1      | 6084     | 113   | - | 5.915911984 | -           | 8.957029334 |
| CAPNS2    | 84290    | 1040  | - | 0.428524394 | -           | 0.77857255  |
| MEP1B     | 4225     | 2327  | - | -           | -           | 0.95690481  |
| PRKAA2    | 5563     | 9369  | - | -           | 0.022551474 | 0.02160624  |
| PRRX2     | 51450    | 1327  | - | -           | -           | 0.152546242 |



|           |          |       |   |             |             |             |
|-----------|----------|-------|---|-------------|-------------|-------------|
| FAM70B    | 348013   | 1047  | - | -           | 0.201800154 | -           |
| LOC644714 | 644714   | 2316  | - | 0.096214458 | 0.273684924 | -           |
| RNF223    | 401934   | 1122  | - | -           | 0.188310839 | 0.180417881 |
| LOC100507 | 1.01E+08 | 750   | - | -           | 0.281713015 | 0.539810301 |
| CCL8      | 6355     | 1351  | - | -           | -           | 15.13346792 |
| CCDC158   | 339965   | 3626  | - | 0.061454133 | 0.058269377 | -           |
| UBXN10    | 127733   | 2987  | - | -           | -           | 0.135539915 |
| TCP11     | 6954     | 2023  | - | -           | -           | 0.100063699 |
| PRODH     | 5625     | 2423  | - | 0.091965615 | -           | -           |
| LIFR      | 3977     | 10258 | - | -           | 0.020597072 | -           |
| DLX3      | 1747     | 2613  | - | -           | -           | 0.077469905 |
| FAM26F    | 441168   | 1109  | - | -           | -           | 0.365065578 |
| C4orf38   | 152641   | 2179  | - | 0.102263738 | -           | -           |
| PLG       | 5340     | 3538  | - | -           | -           | 0.05721562  |
| CSNK1A1P  | 161635   | 1718  | - | 0.259409412 | -           | -           |
| DMRT1     | 1761     | 2229  | - | 0.1999396   | -           | -           |
| SORBS1    | 10580    | 6803  | - | 0.065510123 | -           | -           |
| FAM19A3   | 284467   | 1144  | - | -           | 0.184689477 | -           |
| DTX4      | 23220    | 5795  | - | 0.076905154 | -           | 0.034931642 |
| HIST1H2BM | 8342     | 446   | - | -           | -           | 0.453876374 |
| ZNF141    | 7700     | 1643  | - | -           | -           | 0.123206855 |
| EGLN3     | 112399   | 2722  | - | -           | -           | 0.966780021 |
| MEP1A     | 4224     | 2947  | - | -           | -           | 0.068689808 |
| PRSS22    | 64063    | 1391  | - | -           | -           | 0.436582738 |
| EPB41L4B  | 54566    | 5578  | - | -           | -           | 0.145162326 |
| ENO1-AS1  | 1.01E+08 | 447   | - | -           | 0.472672844 | 0.452860991 |
| CKAP4     | 10970    | 3036  | - | -           | -           | 0.066676174 |
| ATP6V1B1  | 525      | 1956  | - | -           | 0.108018794 | -           |
| IFIT1B    | 439996   | 1972  | - | -           | -           | 0.718560873 |
| SLC6A4    | 6532     | 4535  | - | 0.196544816 | 0.139769412 | 0.08927403  |
| CLCA4     | 22802    | 3285  | - | 0.06783339  | 0.06431804  | -           |
| IL29      | 282618   | 856   | - | -           | -           | 1.182411583 |
| LOC285507 | 285501   | 1039  | - | 0.214468416 | -           | -           |
| LOC440906 | 440900   | 869   | - | -           | -           | 0.465889213 |
| FRK       | 2444     | 2864  | - | -           | 0.147545224 | -           |
| NEURL2    | 140825   | 1276  | - | -           | -           | 0.475929929 |
| GUCA1A    | 2978     | 1918  | - | -           | 0.110158895 | -           |
| MT1A      | 4489     | 468   | - | -           | -           | 0.432540305 |
| GNG12     | 55970    | 4427  | - | -           | -           | 0.182903874 |
| MAPRE3    | 22924    | 1880  | - | 0.355584071 | 0.112385511 | 0.107674927 |
| CD163     | 9332     | 4231  | - | -           | -           | 3.540471723 |
| CYP4F8    | 11283    | 1907  | - | 0.233699722 | -           | -           |
| GAL3ST3   | 89792    | 3335  | - | -           | -           | 0.06069831  |
| NAPSB     | 256236   | 1398  | - | 0.318787818 | -           | 2.027184608 |
| MECOM     | 2122     | 5533  | - | -           | 0.038186293 | -           |
| MSI1      | 4440     | 2950  | - | 0.075536503 | -           | 0.068619954 |
| KLHL31    | 401265   | 5743  | - | -           | -           | 0.03524793  |
| KCNH4     | 23415    | 3923  | - | 21.64141037 | -           | 28.63829185 |
| C2orf78   | 388960   | 3045  | - | -           | -           | 0.066479101 |
| FAM18B2-  | 1.01E+08 | 2926  | - | -           | -           | 0.069182797 |
| RNASE1    | 6035     | 903   | - | -           | 0.23398091  | -           |
| APOF      | 319      | 1720  | - | 0.259107773 | 0.245679955 | 0.117691199 |
| CDRT1     | 374286   | 2780  | - | 0.080155642 | -           | -           |
| ABCC11    | 85320    | 4862  | - | -           | -           | 0.041634896 |
| RGS8      | 85397    | 912   | - | -           | -           | 0.221961473 |
| HMG2P4    | 283651   | 1927  | - | 0.231274193 | 0.219288803 | 0.420194837 |
| IFI30     | 10437    | 1051  | - | 1.060098405 | 0.402064246 | 64.33039032 |
| SH2D1A    | 4068     | 2523  | - | -           | 0.083743465 | -           |
| CACNA2D3  | 55799    | 3689  | - | 0.060404631 | -           | -           |
| FOLR3     | 2352     | 858   | - | 1.298558769 | -           | 3.30303506  |
| GIF       | 2694     | 1536  | - | -           | 0.137555183 | 0.131789624 |
| CRLF1     | 9244     | 1824  | - | -           | 0.347507831 | -           |

|           |          |      |   |             |             |             |
|-----------|----------|------|---|-------------|-------------|-------------|
| NPAS2     | 4862     | 4004 | - | -           | 0.052768422 | -           |
| POU4F1    | 5457     | 3817 | - | 0.116758022 | -           | 0.053033498 |
| NANOS3    | 342977   | 846  | - | -           | -           | 0.239277616 |
| HSPB8     | 26353    | 2056 | - | 0.216763312 | 0.102764962 | 0.098457618 |
| TMEM232   | 642987   | 3193 | - | 0.069787875 | -           | -           |
| TP53TG5   | 27296    | 995  | - | -           | 0.212346494 | -           |
| CYP4F30P  | 1E+08    | 2272 | - | 0.098077766 | -           | 0.089097211 |
| LEKR1     | 389170   | 1976 | - | 0.338308732 | -           | -           |
| PMCH      | 5367     | 757  | - | -           | 0.279108007 | 0.26740933  |
| HPGDS     | 27306    | 1615 | - | -           | 0.130826478 | -           |
| C6orf154  | 221424   | 2121 | - | -           | 0.099615635 | -           |
| SELM      | 140606   | 739  | - | 0.301532726 | -           | 0.273922683 |
| FAM198A   | 729085   | 3449 | - | -           | 0.061259716 | -           |
| LOC10050  | 1.01E+08 | 1200 | - | 0.185693904 | -           | -           |
| VWF       | 7450     | 8833 | - | -           | 0.047839864 | 0.02291734  |
| LOC65351  | 653513   | 877  | - | 0.254085159 | -           | -           |
| SERPINB13 | 5275     | 3197 | - | -           | -           | 0.063318381 |
| GPR61     | 83873    | 2823 | - | -           | 0.074844053 | -           |
| INSC      | 387755   | 2970 | - | -           | 0.07113965  | 0.068157866 |
| CDHR1     | 92211    | 5440 | - | -           | -           | 0.037211188 |
| ADSSL1    | 122622   | 1826 | - | 0.97626587  | 0.462836279 | 4.212648846 |
| LINC00472 | 79940    | 2933 | - | -           | -           | 0.069017683 |
| LOC28595  | 285954   | 2995 | - | -           | -           | 0.540711487 |
| LCT       | 3938     | 6274 | - | 0.07103369  | 0.13470498  | -           |
| HLA-DRB5  | 3127     | 1171 | - | -           | -           | 0.172868371 |
| HRC       | 3270     | 2430 | - | -           | -           | 0.083304059 |
| AIFM3     | 150209   | 2439 | - | -           | 0.086627618 | -           |
| ZSCAN10   | 84891    | 2463 | - | -           | 0.171567001 | 0.082187926 |
| LOC10018  | 1E+08    | 2148 | - | -           | -           | 0.094240625 |
| GABARAPL  | 23766    | 1889 | - | -           | -           | 0.107161918 |
| SLC1A7    | 6512     | 2677 | - | 0.083239703 | 0.236777842 | 0.226853414 |
| RNF144B   | 255488   | 5036 | - | 0.088495903 | 0.041954877 | 0.080392718 |
| FBLL1     | 345630   | 1064 | - | 0.209429215 | -           | -           |
| LOC10028  | 1E+08    | 1068 | - | 0.208644836 | -           | -           |
| LOC15093  | 150935   | 1019 | - | -           | 0.82938081  | 1.390581002 |
| FAM159A   | 348378   | 698  | - | -           | -           | 0.290012698 |
| APOC4-AP  | 1.01E+08 | 1829 | - | -           | 0.231038558 | -           |
| SARM1     | 23098    | 7001 | - | 0.095486081 | -           | 0.057828557 |
| SLC25A2   | 83884    | 1417 | - | 0.314513317 | -           | 0.142857349 |
| CPNE3     | 8895     | 4883 | - | 0.045634381 | -           | 0.041455839 |
| ASCL3     | 56676    | 650  | - | -           | 0.975160437 | -           |
| BCL2L14   | 79370    | 2039 | - | -           | -           | 1.290620509 |
| SCARNA27  | 1E+08    | 126  | - | 8.842566855 | -           | 3.213156555 |
| LINC00256 | 1E+08    | 5836 | - | -           | 0.036203695 | 0.069372468 |
| EFNB2     | 1948     | 4404 | - | 0.101195588 | 0.095951299 | 0.091929547 |
| MTVR2     | 246754   | 812  | - | 1.097697954 | 0.520405816 | 1.246483146 |
| PLAT      | 5327     | 3173 | - | -           | 0.066588327 | 0.063797309 |
| LTBP1     | 4052     | 6168 | - | 0.108381656 | -           | 0.032819206 |
| HIST1H4B  | 8366     | 357  | - | -           | 0.591834065 | 0.567027627 |
| ACOT1     | 641371   | 1603 | - | 0.278019569 | 0.13180584  | 0.126281262 |
| SLC5A11   | 115584   | 2384 | - | -           | -           | 0.084911436 |
| ANKRD2    | 26287    | 1462 | - | 0.152416337 | -           | -           |
| FAM5B     | 57795    | 3617 | - | 0.061607046 | -           | -           |
| SLC45A1   | 50651    | 2401 | - | -           | -           | 0.08431023  |
| P2RY14    | 9934     | 2694 | - | 0.744429904 | 0.156855799 | 1.728234539 |
| GLRA2     | 2742     | 3458 | - | 0.128879517 | 0.366601668 | 0.058539289 |
| OR7E24    | 26648    | 1020 | - | -           | 0.207141923 | -           |
| DSG2      | 1829     | 5677 | - | 0.078503676 | 0.074435357 | 0.106973153 |
| PRDM5     | 11107    | 2492 | - | 0.178838431 | -           | 0.812314859 |
| SV2A      | 9900     | 4431 | - | -           | -           | 0.04568469  |
| SLC29A4   | 222962   | 2910 | - | -           | 0.072606447 | -           |
| TSPYL6    | 388951   | 3095 | - | -           | 0.068266482 | 0.065405125 |

|           |          |       |   |             |             |             |
|-----------|----------|-------|---|-------------|-------------|-------------|
| DMRT2     | 10655    | 2944  | - | -           | 0.071767922 | 0.068759804 |
| DBNDD2    | 55861    | 1212  | - | 0.18385535  | -           | 0.167020514 |
| COL4A3    | 1285     | 8114  | - | -           | 0.026039532 | -           |
| LOC728640 | 728640   | 2520  | - | -           | -           | 0.240986742 |
| KIR2DL3   | 3804     | 1596  | - | -           | -           | 0.126835127 |
| RPL13AP6  | 644511   | 653   | - | 0.68248908  | 0.323560125 | 0.309998259 |
| GYLTL1B   | 120071   | 2539  | - | 0.087763956 | -           | -           |
| SLC6A18   | 348932   | 2141  | - | -           | 0.098685082 | -           |
| EFNA5     | 1946     | 5335  | - | 0.083536152 | -           | 0.303548436 |
| HIST1H4A  | 8359     | 372   | - | 0.599012593 | -           | -           |
| ITLN1     | 55600    | 1209  | - | 0.368623134 | 0.34951987  | 0.167434957 |
| C3orf24   | 115795   | 1105  | - | 0.201658538 | -           | -           |
| WNT8A     | 7478     | 1498  | - | -           | -           | 0.135132752 |
| NACA2     | 342538   | 770   | - | 0.289393097 | -           | -           |
| LOC338651 | 338651   | 2266  | - | -           | -           | 0.089333126 |
| PRO0611   | 28997    | 570   | - | 0.390934535 | 1.11202506  | 0.710276712 |
| TPTE2P6   | 374491   | 2727  | - | -           | -           | 0.222694019 |
| CCDC102B  | 79839    | 2828  | - | 0.1575903   | 0.074711726 | 0.143160441 |
| RGN       | 9104     | 2255  | - | -           | -           | 0.089768897 |
| NR3C2     | 4306     | 5915  | - | 0.113017423 | 0.14288065  | -           |
| SOAT2     | 8435     | 2073  | - | 0.107492853 | 0.10192222  | 0.781201594 |
| LOC100130 | 1E+08    | 1746  | - | -           | -           | 0.231877277 |
| DISC1     | 27185    | 7165  | - | 0.093300496 | 0.11795381  | 0.423786873 |
| OR5K2     | 402135   | 951   | - | -           | 0.222171148 | -           |
| ACTC1     | 70       | 3693  | - | 0.060339205 | -           | -           |
| CKMT1A    | 548596   | 1779  | - | -           | -           | 0.113788006 |
| HYAL4     | 23553    | 2411  | - | 0.092423345 | 0.175267326 | -           |
| SPA17     | 53340    | 955   | - | -           | -           | 0.211967396 |
| SSX5      | 6758     | 1399  | - | -           | 0.151025562 | -           |
| MGC70870  | 403340   | 3126  | - | 0.142567297 | 0.13517899  | -           |
| GRIK1-AS1 | 642976   | 1103  | - | 0.202024193 | -           | 0.367051429 |
| RDH5      | 5959     | 1359  | - | 0.163968127 | 0.466412277 | 0.297908555 |
| CAV1      | 857      | 3212  | - | -           | -           | 0.063022685 |
| CYS1      | 192668   | 2719  | - | -           | -           | 0.223349242 |
| LOC100501 | 1.01E+08 | 4103  | - | 0.380167876 | 0.102990378 | 0.29602076  |
| UTY       | 7404     | 4931  | - | 0.045190161 | -           | -           |
| KCNT1     | 57582    | 4782  | - | 0.046598219 | -           | -           |
| FAM64A    | 54478    | 1563  | - | 0.42770189  | -           | -           |
| FSTL5     | 56884    | 4867  | - | -           | 0.173646814 | 0.041592123 |
| TNFSF18   | 8995     | 748   | - | -           | -           | 0.270626822 |
| RASA4P    | 401331   | 1545  | - | 0.865369649 | 0.683769454 | 1.441241095 |
| C3orf35   | 339883   | 1558  | - | 0.14302483  | -           | -           |
| LRRC15    | 131578   | 5940  | - | -           | 0.035569825 | -           |
| LOC728060 | 728066   | 2023  | - | -           | 0.208882611 | 0.300191097 |
| TIMP3     | 7078     | 5496  | - | -           | 0.03844337  | -           |
| FNDC5     | 252995   | 3035  | - | -           | 0.278464265 | 0.133396285 |
| PKD1L3    | 342372   | 5199  | - | 0.085721364 | 0.081279    | 0.038936115 |
| GSTM2P1   | 442245   | 1136  | - | 0.196155532 | -           | -           |
| PLA2G5    | 5322     | 1911  | - | -           | -           | 0.105928238 |
| PPP1R9A   | 55607    | 10519 | - | 0.021183828 | -           | 0.038488233 |
| CLEC4C    | 170482   | 1314  | - | 0.339166948 | -           | 0.770277256 |
| TNFRSF4   | 7293     | 1120  | - | 0.397915508 | 2.2637653   | 0.542220169 |
| CD5L      | 922      | 2248  | - | 0.19824972  | -           | 0.360193706 |
| PPP1R36   | 145376   | 1405  | - | 0.158599776 | 0.150380613 | 0.432232448 |
| TRIL      | 9865     | 5056  | - | 0.04407292  | 0.041788916 | -           |
| TNNI2     | 7136     | 746   | - | 4.181846631 | -           | 17.63790361 |
| CDH22     | 64405    | 3675  | - | -           | -           | 0.110165368 |
| PPL       | 5493     | 6256  | - | -           | 0.067546279 | -           |
| FGF9      | 2254     | 4545  | - | 0.049028093 | -           | 0.133616411 |
| MFSD2B    | 388931   | 1508  | - | 0.147767032 | -           | -           |
| OSBP2     | 23762    | 4349  | - | 0.051237683 | 0.097164756 | 0.139638213 |
| WISP1     | 8840     | 5194  | - | 0.514823299 | 0.040678622 | 1.948679851 |

|           |          |       |   |             |             |             |
|-----------|----------|-------|---|-------------|-------------|-------------|
| GPR151    | 134391   | 1260  | - | 0.353702674 | 0.335372637 | -           |
| DUOXA1    | 90527    | 1923  | - | -           | -           | 0.105267219 |
| CALD1     | 800      | 5241  | - | 0.042517208 | -           | 0.077248183 |
| CYB5R2    | 51700    | 1348  | - | 0.330612292 | -           | -           |
| DBNDD2    | 55861    | 1486  | - | -           | 0.142183554 | -           |
| TGM3      | 7053     | 2679  | - | 7.985045814 | 0.630936204 | 19.26814485 |
| CYP4F22   | 126410   | 2620  | - | 0.085050643 | -           | -           |
| IFNA4     | 3441     | 982   | - | -           | -           | 0.206139372 |
| C7orf51   | 222950   | 3581  | - | -           | 0.059001609 | -           |
| GRIN2A    | 2903     | 14706 | - | -           | -           | 0.013765053 |
| PHOSPHO   | 162466   | 2173  | - | 0.102546104 | -           | 6.520948185 |
| TMEM196   | 256130   | 3381  | - | -           | 0.062491796 | -           |
| KRT3      | 3850     | 2327  | - | -           | 0.090797061 | -           |
| DMRT3     | 58524    | 2184  | - | -           | -           | 0.092687208 |
| TRIM55    | 84675    | 2859  | - | 0.077940778 | -           | -           |
| LOC10028  | 1E+08    | 1073  | - | -           | 0.196910309 | 0.188656909 |
| ZNF483    | 158399   | 3721  | - | 0.479081289 | 0.908507439 | 1.142436475 |
| KCTD4     | 386618   | 2133  | - | -           | 0.099055209 | -           |
| LGR5      | 8549     | 2880  | - | -           | 0.073362764 | -           |
| IFNA8     | 3445     | 1039  | - | -           | 0.203353957 | 1.948304745 |
| NEUROG2   | 63973    | 2370  | - | -           | -           | 0.341652089 |
| PFKFB2    | 5208     | 7073  | - | 0.315046917 | -           | 2.661654779 |
| CYP11A1   | 1583     | 2010  | - | -           | -           | 0.100710877 |
| AURKC     | 6795     | 1261  | - | 0.530133271 | 0.16755334  | -           |
| TSNAX-DIS | 1E+08    | 3557  | - | 0.062646243 | -           | 0.056909998 |
| SLC6A7    | 6534     | 3756  | - | -           | -           | 0.161684395 |
| FAM157A   | 728262   | 1275  | - | 0.699082933 | 0.662854153 | 3.334122449 |
| TAG       | 404663   | 624   | - | 0.357103661 | 0.338597374 | 0.324405229 |
| LOC72872  | 728723   | 1154  | - | -           | 0.183089048 | 0.350829918 |
| FLJ44054  | 643365   | 2928  | - | -           | -           | 0.069135541 |
| LOXHD1    | 125336   | 6854  | - | 0.162556671 | -           | 0.11813765  |
| GRM2      | 2912     | 3389  | - | 0.065751751 | -           | -           |
| ENDOU     | 8909     | 2474  | - | 0.270209399 | 0.170804172 | 0.081822499 |
| ALB       | 213      | 2264  | - | 0.295272992 | 0.279970974 | 0.268236126 |
| SPHK1     | 8877     | 2202  | - | 2.934672052 | 0.575707797 | 9.836461551 |
| CPLX3     | 594855   | 2012  | - | 0.332255494 | 0.210024614 | 1.60977227  |
| LOC72822  | 728228   | 692   | - | 0.6440251   | 0.610649599 | 0.877581776 |
| GUCY2E    | 390226   | 2799  | - | -           | -           | 0.072321852 |
| ZNF812    | 729648   | 2011  | - | -           | 0.210129052 | -           |
| GK3P      | 2713     | 2232  | - | 0.099835432 | -           | 0.18138787  |
| SLC10A1   | 6554     | 1631  | - | 0.136623351 | -           | -           |
| SLC36A3   | 285641   | 2983  | - | -           | -           | 0.067860832 |
| TACSTD2   | 4070     | 2080  | - | 0.107131098 | 0.101579212 | 0.097321569 |
| PRSS30P   | 124221   | 2963  | - | 0.225615273 | 0.142615431 | 1.161421083 |
| GALNTL1   | 57452    | 4309  | - | 0.051713317 | -           | 0.093956307 |
| IGFL4     | 444882   | 573   | - | 0.777775514 | -           | -           |
| DPEP1     | 1800     | 1752  | - | -           | 0.120596325 | -           |
| SYT8      | 90019    | 1423  | - | -           | -           | 0.142254999 |
| PAR5      | 8123     | 3373  | - | -           | -           | 0.060014486 |
| FAM170B   | 170370   | 1426  | - | -           | -           | 0.141955724 |
| ZNF880    | 400713   | 2285  | - | 0.097519775 | -           | 0.265770936 |
| LOC10050  | 1.01E+08 | 731   | - | -           | -           | 0.276920469 |
| GKN2      | 200504   | 826   | - | -           | 0.255792689 | -           |
| RTP4      | 64108    | 1027  | - | 0.216974377 | -           | 22.66730208 |
| LOC28541  | 285419   | 2222  | - | 2.507118415 | -           | 0.911020985 |
| CCT8L2    | 150160   | 2065  | - | -           | -           | 0.098028505 |
| CKLF-CMT  | 1.01E+08 | 794   | - | -           | -           | 0.25494819  |
| CPLX1     | 10815    | 2200  | - | 0.101287584 | -           | -           |
| BTG4      | 54766    | 1000  | - | 0.445665369 | -           | -           |
| OR9A2     | 135924   | 933   | - | -           | -           | 0.216965555 |
| KRT16P2   | 400578   | 1575  | - | -           | -           | 0.257052524 |
| GPR171    | 29909    | 1862  | - | -           | 0.113471945 | -           |

|           |          |       |   |             |             |             |
|-----------|----------|-------|---|-------------|-------------|-------------|
| LINC00158 | 54072    | 1480  | - | 0.30112525  | 0.142759974 | -           |
| JAKMIP3   | 282973   | 6488  | - | -           | -           | 0.031200503 |
| CXCR5     | 643      | 2893  | - | 4.929585836 | -           | 23.16071678 |
| TBX2      | 6909     | 3396  | - | -           | 0.062215772 | -           |
| ACCN1     | 40       | 2747  | - | 0.08111856  | -           | 0.147381771 |
| GCNT7     | 140687   | 2064  | - | 0.431846288 | 0.204733296 | 0.196151999 |
| SEC16B    | 89866    | 4024  | - | -           | -           | 4.376568359 |
| KCNN2     | 3781     | 1457  | - | 1.682333241 | -           | 1.250418508 |
| LOC10050  | 1.01E+08 | 2477  | - | 0.269882137 | -           | 0.163446801 |
| LOC65022  | 650226   | 1667  | - | -           | 0.126745508 | -           |
| EGOT      | 1E+08    | 1529  | - | 0.145737531 | 0.138184932 | 0.264785955 |
| MYH14     | 79784    | 6930  | - | 0.064309577 | -           | 0.058421028 |
| GRK1      | 6011     | 2100  | - | 0.106110802 | -           | -           |
| CXorf30   | 645090   | 2869  | - | -           | -           | 0.070557289 |
| LOC10050  | 1.01E+08 | 797   | - | -           | -           | 0.253988536 |
| MPEG1     | 219972   | 4527  | - | 3.839396821 | 0.140016409 | 0.715454342 |
| FLJ42709  | 441094   | 2791  | - | -           | 0.227106515 | 0.072529152 |
| KRT7      | 3855     | 1753  | - | -           | 0.120527531 | -           |
| EPS8L2    | 64787    | 3156  | - | 0.070606047 | -           | 0.192422874 |
| BTLA      | 151888   | 3216  | - | 0.20786631  | 0.065697998 | 0.062944298 |
| LOC39094  | 390940   | 938   | - | -           | 0.450500557 | -           |
| NMNAT3    | 349565   | 1919  | - | -           | 0.110101491 | 0.10548664  |
| EMX1      | 2016     | 2188  | - | 0.101843092 | -           | -           |
| CTSL1P8   | 1518     | 569   | - | -           | -           | 0.355762501 |
| NPHP1     | 4867     | 2758  | - | -           | -           | 1.02755768  |
| CXCR1     | 3577     | 2502  | - | 0.178123649 | -           | 0.08090682  |
| HOXA9     | 3205     | 2076  | - | 0.107337517 | 0.101774933 | 0.097509086 |
| PLVAP     | 83483    | 2317  | - | -           | 0.182377869 | 0.698934356 |
| TMEM171   | 134285   | 1266  | - | -           | -           | 0.159896416 |
| SH3TC2    | 79628    | 26588 | - | 0.008380949 | 0.007946621 | 0.007613542 |
| PGLYRP2   | 114770   | 1901  | - | -           | -           | 0.106485462 |
| FXD6-FXY  | 1.01E+08 | 1184  | - | -           | -           | 0.170970323 |
| CNPY1     | 285888   | 2234  | - | -           | -           | 0.090612741 |
| CD14      | 929      | 1661  | - | 0.13415574  | 0.636016741 | 12.30903983 |
| C17orf46  | 124783   | 1297  | - | 0.171806233 | 0.162902669 | 0.156074682 |
| PTCRA     | 171558   | 1097  | - | -           | -           | 1.291706509 |
| SLC6A11   | 6538     | 1991  | - | 0.111919982 | -           | -           |
| ANKRD26P  | 1E+08    | 3794  | - | 0.058732916 | 0.055689183 | 0.053354998 |
| ZFY       | 7544     | 4769  | - | -           | -           | 0.042446815 |
| LOC28457  | 284578   | 2363  | - | 0.094300755 | -           | -           |
| XPNPEP2   | 7512     | 3333  | - | -           | -           | 0.242938929 |
| OR52W1    | 120787   | 963   | - | 0.231394273 | -           | 0.210206504 |
| NCOR1P1   | 149934   | 419   | - | -           | 0.504259574 | -           |
| SERPINC1  | 462      | 1599  | - | 0.278715053 | 0.660677803 | -           |
| SPATA8    | 145946   | 1041  | - | -           | -           | 0.19445616  |
| S100A5    | 6276     | 710   | - | -           | 0.297584171 | 0.285111075 |
| DIRC1     | 116093   | 1454  | - | 0.306509883 | -           | -           |
| FAM110C   | 642273   | 3963  | - | -           | -           | 0.051079703 |
| MKRN9P    | 400058   | 1827  | - | 0.121966439 | -           | -           |
| TMEM191   | 645426   | 1325  | - | -           | 0.159460197 | -           |
| CD200R1L  | 344807   | 1365  | - | -           | 0.309574742 | -           |
| FOXI2     | 399823   | 3178  | - | -           | 0.066483562 | -           |
| PRSS37    | 136242   | 1197  | - | -           | -           | 0.169113503 |
| UNC5B     | 219699   | 4998  | - | 0.089168741 | 0.126821585 | -           |
| SELV      | 348303   | 1704  | - | -           | -           | 0.118796281 |
| TKTL1     | 8277     | 2652  | - | -           | -           | 1.221290274 |
| C1orf126  | 200197   | 6979  | - | 0.031929028 | -           | 0.087016276 |
| HIST1H2AF | 3012     | 564   | - | 1.185280238 | -           | 0.358916424 |
| ABCA6     | 23460    | 5296  | - | -           | -           | 0.076445945 |
| LOC28562  | 285626   | 1580  | - | -           | 0.133724533 | -           |
| SLC22A9   | 114571   | 2327  | - | -           | 0.181594122 | 0.086991346 |
| KLHL10    | 317719   | 2009  | - | 0.22183443  | -           | -           |

|           |          |       |   |             |             |             |
|-----------|----------|-------|---|-------------|-------------|-------------|
| ZNF573    | 126231   | 2448  | - | -           | -           | 0.082691529 |
| FLJ30679  | 146512   | 1980  | - | -           | -           | 0.204473599 |
| KRT5      | 3852     | 2320  | - | -           | -           | 0.698030562 |
| TSHR      | 7253     | 4410  | - | -           | -           | 0.045902236 |
| FCN2      | 2220     | 1057  | - | -           | 0.199890976 | -           |
| FLJ34503  | 285759   | 2006  | - | -           | -           | 0.100911696 |
| PTGDS     | 5730     | 837   | - | -           | 0.504862034 | -           |
| C1orf49   | 84066    | 921   | - | 0.241946455 | 0.229407993 | 0.439584936 |
| HLA-DPA1  | 3113     | 1157  | - | 0.192595233 | -           | 0.699840494 |
| LOC14578  | 145783   | 3017  | - | 0.073859027 | -           | 0.134192153 |
| CD300E    | 342510   | 3525  | - | 0.126429892 | 0.059938939 | 0.229706511 |
| SPATA21   | 374955   | 2015  | - | -           | -           | 0.200921948 |
| C10orf40  | 283025   | 1815  | - | -           | -           | 0.111531054 |
| LRRC31    | 79782    | 2520  | - | 0.088425669 | 0.083843159 | 1.526249364 |
| CHODL     | 140578   | 2625  | - | 0.084888642 | -           | -           |
| C1QL1     | 10882    | 1517  | - | 0.293780731 | -           | 0.133440252 |
| LOC72798  | 727982   | 2674  | - | -           | 0.079014496 | -           |
| C20orf202 | 400831   | 1604  | - | -           | -           | 0.252405066 |
| CGA       | 1081     | 704   | - | -           | -           | 0.287540999 |
| RSPH6A    | 81492    | 2484  | - | 0.0897072   | 0.085058278 | 0.162986202 |
| UBASH3A   | 53347    | 2492  | - | -           | 0.084785217 | -           |
| ELF3      | 1999     | 3263  | - | 0.13658148  | 0.129503378 | 0.124075307 |
| LRRC7     | 57554    | 6313  | - | 0.070594863 | -           | 0.064130798 |
| GCKR      | 2646     | 2197  | - | -           | -           | 0.092138763 |
| LOC10050  | 1.01E+08 | 2073  | - | -           | -           | 0.097650199 |
| LINC00261 | 140828   | 4924  | - | 0.045254404 | -           | 0.205553273 |
| NCRNA001  | 55410    | 1508  | - | 0.295534065 | -           | -           |
| C19orf45  | 374877   | 1709  | - | -           | -           | 0.11844872  |
| TMEM150   | 284417   | 875   | - | -           | 0.482936597 | 2.776167263 |
| CNIH2     | 254263   | 1399  | - | -           | -           | 0.144695399 |
| CLIP4     | 79745    | 4284  | - | 0.052015099 | -           | -           |
| CCR5      | 1234     | 3686  | - | 1.027714498 | -           | 16.42057244 |
| FAM166A   | 401565   | 1163  | - | -           | 0.181672194 | -           |
| HIST4H4   | 121504   | 412   | - | -           | -           | 0.491332192 |
| F2RL1     | 2150     | 2883  | - | -           | 0.073286424 | -           |
| MCHR2     | 84539    | 2368  | - | -           | 0.089224984 | -           |
| GDF15     | 9518     | 1220  | - | 9.497786563 | -           | 115.8158577 |
| IL15      | 3600     | 2333  | - | 1.050647035 | 0.362254199 | 1.041211468 |
| WNT5B     | 81029    | 2251  | - | 0.395971008 | -           | 0.269785246 |
| MED12L    | 116931   | 10349 | - | -           | -           | 0.058680702 |
| KIF26A    | 26153    | 6757  | - | -           | 0.062538038 | -           |
| TRPV6     | 55503    | 2918  | - | 0.076364868 | -           | 0.069372468 |
| SCN4A     | 6329     | 7805  | - | 0.028549992 | -           | 0.051871586 |
| NTRK1     | 4914     | 2663  | - | 0.167354626 | 0.634727034 | 0.228046034 |
| CORO6     | 84940    | 2397  | - | 0.092963156 | -           | -           |
| HORMAD1   | 84072    | 1898  | - | -           | 0.111319685 | 0.53326887  |
| POC1B-GA  | 1.01E+08 | 5507  | - | -           | 0.038366581 | -           |
| TCL6      | 27004    | 3307  | - | -           | 0.127780321 | 0.061212236 |
| LINC00314 | 246705   | 583   | - | 0.382217298 | -           | -           |
| C17orf28  | 283987   | 3369  | - | -           | 0.125428769 | -           |
| RPL13AP5  | 728658   | 658   | - | 2.031908979 | 0.321101461 | 1.845855893 |
| ADAM19    | 8728     | 6506  | - | 0.137001343 | -           | 0.031114181 |
| CEACAM3   | 1084     | 1151  | - | 0.193599205 | -           | 2.462210323 |
| CSMD3     | 114788   | 13150 | - | 0.016945451 | -           | -           |
| FKBP1B    | 2281     | 1016  | - | -           | -           | 0.199241007 |
| CPXM2     | 119587   | 3750  | - | -           | -           | 0.05398103  |
| PGR       | 5241     | 13037 | - | 0.017092328 | -           | -           |
| RGPD1     | 400966   | 6711  | - | 0.099612286 | 0.15741675  | 0.150818703 |
| C17orf108 | 201229   | 1495  | - | 0.447155889 | -           | 0.677019609 |
| ANKRD20A  | 441425   | 3964  | - | 0.112428196 | -           | 0.051066817 |
| PPP1R1C   | 151242   | 1014  | - | -           | -           | 0.199633987 |
| GUCY2F    | 2986     | 3698  | - | -           | -           | 0.164220278 |

|             |          |       |   |             |             |             |
|-------------|----------|-------|---|-------------|-------------|-------------|
| RNASE11     | 122651   | 1769  | - | -           | -           | 0.11443124  |
| SH2D1B      | 117157   | 2553  | - | 0.960109492 | -           | 4.202400994 |
| SEN3P3-EIF4 | 1.01E+08 | 4303  | - | 0.051785425 | 0.294610404 | 0.094087317 |
| LOC286359   | 286359   | 2034  | - | 0.219107851 | 0.103876481 | -           |
| CYSLTR2     | 57105    | 2548  | - | 1.136901453 | 0.248765418 | 1.827262107 |
| ZNF704      | 619279   | 14403 | - | -           | -           | 0.014054632 |
| KLHL32      | 114792   | 3807  | - | -           | -           | 0.106345607 |
| FLJ42351    | 400999   | 514   | - | -           | 0.411059847 | -           |
| DGCR10      | 26222    | 944   | - | 0.708154718 | -           | 1.072186774 |
| STEAP1B     | 256227   | 1299  | - | -           | -           | 0.155834383 |
| OR11A1      | 26531    | 2229  | - | 0.0999698   | 0.189578072 | 0.090816    |
| RPL13AP1    | 399670   | 1848  | - | -           | 0.114331581 | -           |
| TNS3        | 64759    | 7639  | - | -           | 0.082976081 | 0.158996358 |
| C1orf227    | 149643   | 537   | - | -           | 1.180361795 | 1.130887503 |
| RAB39       | 54734    | 1845  | - | 0.120776523 | 0.114517486 | 0.109717541 |
| ASXL3       | 80816    | 7642  | - | 0.087476846 | -           | 0.02648899  |
| DENND2D     | 79961    | 2062  | - | -           | -           | 0.981711266 |
| TXNDC8      | 255220   | 501   | - | -           | -           | 0.404049627 |
| LRP2        | 4036     | 15735 | - | 0.028323188 | -           | 0.141513663 |
| SIGLEC9     | 27180    | 1737  | - | 0.513143776 | 1.094739696 | 3.729259421 |
| FRMD3       | 257019   | 2529  | - | 0.088110986 | 0.16708957  | 0.800430459 |
| GCET2       | 257144   | 3355  | - | 0.066418088 | 0.062976084 | 0.120672944 |
| LOC731789   | 731789   | 6118  | - | -           | 0.03453494  | 0.033087424 |
| CA4         | 762      | 1165  | - | -           | -           | 0.695034723 |
| CATSPERG    | 57828    | 3727  | - | 0.119577507 | -           | 0.054314157 |
| FFAR3       | 2865     | 1709  | - | 5.606673753 | 0.247261277 | 44.29982138 |
| LOC388553   | 388553   | 1170  | - | 0.190455286 | 0.180585266 | -           |
| STON2       | 85439    | 2919  | - | -           | -           | 0.069348703 |
| HIST3H3     | 8290     | 481   | - | 0.92653923  | -           | 0.420850027 |
| NCR1        | 9437     | 1153  | - | -           | 0.183247842 | -           |
| HIST1H4H    | 8365     | 374   | - | 0.595809317 | -           | 0.541253644 |
| CRISP3      | 10321    | 2231  | - | 1.198562177 | -           | 0.090734587 |
| C1orf114    | 57821    | 1866  | - | 0.238834603 | 0.339686112 | 0.325448333 |
| PRPH2       | 5961     | 3027  | - | 0.220845079 | 0.139600107 | -           |
| ADH4        | 127      | 1980  | - | 0.11254176  | -           | 0.204473599 |
| ALS2CL      | 259173   | 3324  | - | -           | 0.063563406 | -           |
| SUMO1P3     | 474338   | 1210  | - | 0.552477731 | 0.523846516 | 1.003779486 |
| LOC91149    | 91149    | 4622  | - | -           | -           | 0.043796812 |
| BDAG1       | 57653    | 6348  | - | -           | 0.066567348 | -           |
| MPZL2       | 10205    | 2871  | - | -           | -           | 0.070508138 |
| ZACN        | 353174   | 1473  | - | -           | -           | 0.137426248 |
| LOC440356   | 440356   | 782   | - | -           | 0.270185117 | 0.258860439 |
| SCN2A       | 6326     | 8876  | - | -           | -           | 0.022806316 |
| C21orf49    | 54067    | 1215  | - | 0.183401387 | 0.173896923 | -           |
| GOLGA6A     | 342096   | 3176  | - | 0.070161425 | -           | -           |
| GPER        | 2852     | 2981  | - | -           | 0.070877142 | 0.067906361 |
| MCART2      | 147407   | 1185  | - | 0.18804446  | -           | -           |
| SGCA        | 6442     | 1441  | - | 0.154637533 | -           | 0.140478045 |
| KIF5A       | 3798     | 3897  | - | -           | -           | 0.051944794 |
| NAALADL1    | 10004    | 2703  | - | 0.082439025 | 0.312667053 | -           |
| SLC38A4     | 55089    | 3999  | - | 0.055722102 | 0.052834399 | 0.151859612 |
| NEU4        | 129807   | 2551  | - | -           | 0.082824289 | 0.079352749 |
| C21orf15    | 54094    | 1296  | - | -           | 0.163028365 | -           |
| GPR89B      | 51463    | 2150  | - | 0.207286218 | -           | -           |
| EPSTI1      | 94240    | 1594  | - | -           | -           | 0.634971339 |
| AADA4L4     | 343066   | 1575  | - | 0.14148107  | -           | -           |
| PDE1C       | 5137     | 2979  | - | -           | -           | 0.067951951 |
| FLJ25363    | 401082   | 1493  | - | -           | 0.28303384  | 0.271170613 |
| MGC2889     | 84789    | 2211  | - | 0.100783666 | -           | -           |
| SH3GL2      | 6456     | 2745  | - | 0.081177663 | 0.230912307 | 0.073744577 |
| ZNF705G     | 1E+08    | 925   | - | 0.2409002   | -           | -           |
| ONECUT1     | 3175     | 1925  | - | -           | 0.109758318 | -           |

|           |          |      |   |             |             |             |
|-----------|----------|------|---|-------------|-------------|-------------|
| HSPB6     | 126393   | 1457 | - | 0.152939386 | -           | 0.13893539  |
| FOXP2     | 93986    | 6448 | - | 0.034558419 | -           | -           |
| C15orf54  | 400360   | 3080 | - | -           | 0.068598948 | -           |
| SLED1     | 643036   | 751  | - | 0.296714627 | 0.281337898 | 0.539091513 |
| GPR142    | 350383   | 1389 | - | -           | -           | 0.145737122 |
| ABLIM3    | 22885    | 4335 | - | 0.051403157 | -           | -           |
| SLC25A47  | 283600   | 1733 | - | -           | -           | 0.116808346 |
| HTR1D     | 3352     | 2857 | - | 0.077995339 | -           | -           |
| C3orf43   | 255798   | 1810 | - | -           | 0.116731912 | -           |
| D4S234E   | 27065    | 3124 | - | -           | 0.067632766 | 0.129595943 |
| GLDC      | 2731     | 3820 | - | 0.058333164 | -           | 0.105983698 |
| ITIH3     | 3699     | 3037 | - | -           | 0.069570221 | -           |
| VMO1      | 284013   | 821  | - | -           | -           | 0.246563779 |
| FER1L5    | 90342    | 6477 | - | 0.034403688 | -           | -           |
| EIF3CL    | 728689   | 3053 | - | 0.072988105 | -           | -           |
| GJB6      | 10804    | 2178 | - | -           | -           | 0.18588509  |
| CD40      | 958      | 1616 | - | -           | -           | 5.636942347 |
| TFCP2L1   | 29842    | 9306 | - | -           | -           | 0.043505021 |
| GCM2      | 9247     | 2379 | - | -           | -           | 0.085089896 |
| INSL6     | 11172    | 711  | - | -           | -           | 0.284710074 |
| FAM21B    | 55747    | 4328 | - | 0.051486295 | 0.048818106 | -           |
| BCL2L2-PA | 1.01E+08 | 2130 | - | -           | 0.099194724 | -           |
| C17orf47  | 284083   | 2127 | - | -           | -           | 0.190342137 |
| ADAMDEC   | 27299    | 2438 | - | 0.548398732 | -           | 1.909706254 |
| C20orf26  | 26074    | 4120 | - | -           | -           | 0.049133219 |
| EVPLL     | 645027   | 2015 | - | 0.11058694  | -           | -           |
| DNMT3L    | 29947    | 1705 | - | -           | 0.495682725 | 0.237453212 |
| CLC       | 1178     | 641  | - | 4.519227616 | -           | 68.8447615  |
| CD200R1   | 131450   | 2272 | - | 0.294233299 | 1.022945588 | 1.960138638 |
| CLCNKA    | 1187     | 2556 | - | 0.087180237 | 0.08266227  | 0.395987604 |
| TAS2R42   | 353164   | 945  | - | 0.235801783 | 0.223581758 | -           |
| LIMS3-LOC | 1E+08    | 3219 | - | 0.069224195 | 0.06563677  | -           |
| BLNK      | 29760    | 1829 | - | 1.340163768 | 0.115519279 | 5.312512532 |
| IGFBP6    | 3489     | 980  | - | 0.909521162 | -           | 2.478720771 |
| GLUD2     | 2747     | 2348 | - | 0.094903188 | 0.089984992 | -           |
| RNU6-1    | 26827    | 106  | - | 2.102195139 | -           | -           |
| ANXA3     | 306      | 1634 | - | -           | -           | 0.123885473 |
| CCDC151   | 115948   | 2176 | - | -           | 0.097097776 | -           |
| PRKAG3    | 53632    | 2299 | - | -           | -           | 0.088050832 |
| GNA14     | 9630     | 2492 | - | -           | 0.169570434 | -           |
| WASH7P    | 653635   | 1786 | - | 0.249532682 | -           | 0.113342029 |
| KCNMB2    | 10242    | 2543 | - | -           | 0.083084845 | -           |
| TYRO3P    | 7302     | 864  | - | 0.5158164   | -           | 0.234292665 |
| PPM1E     | 22843    | 6540 | - | 0.034072276 | 0.032306538 | -           |



**Table S2.** Pathway analysis of genes suppressed or reactivated upon ATRA treatment.

| Category | Term                                                       | Genes | Count | %   | <i>P</i> -Value | Benjamini |
|----------|------------------------------------------------------------|-------|-------|-----|-----------------|-----------|
|          | Cell cycle                                                 |       | 113   | 0.8 | 2.5E-09         | 5E-07     |
|          | Ribosome                                                   |       | 80    | 0.6 | 1.5E-07         | 0.000015  |
|          | Spliceosome                                                |       | 110   | 0.8 | 3.6E-07         | 0.000024  |
|          | DNA replication                                            |       | 36    | 0.3 | 9.8E-06         | 0.00048   |
|          | Pyrimidine metabolism                                      |       | 83    | 0.6 | 0.000013        | 0.00052   |
|          | Nucleotide excision repair                                 |       | 42    | 0.3 | 0.000039        | 0.0013    |
|          | Aminoacyl-tRNA biosynthesis                                |       | 39    | 0.3 | 0.00011         | 0.003     |
|          | Purine metabolism                                          |       | 124   | 0.9 | 0.00014         | 0.0035    |
|          | Progesterone-mediated oocyte maturation                    |       | 72    | 0.5 | 0.0009          | 0.02      |
|          | Mismatch repair                                            |       | 23    | 0.2 | 0.0012          | 0.024     |
|          | Ubiquitin mediated proteolysis                             |       | 109   | 0.8 | 0.0014          | 0.025     |
|          | Homologous recombination                                   |       | 27    | 0.2 | 0.0014          | 0.023     |
|          | B cell receptor signaling pathway                          |       | 63    | 0.5 | 0.0018          | 0.027     |
|          | <b>Lysosome</b>                                            |       | 94    | 0.7 | 0.0018          | 0.026     |
|          | Endocytosis                                                |       | 142   | 1.1 | 0.0024          | 0.031     |
|          | Focal adhesion                                             |       | 154   | 1.1 | 0.0026          | 0.032     |
|          | RNA degradation                                            |       | 49    | 0.4 | 0.0028          | 0.032     |
|          | Valine, leucine and isoleucine degradation                 |       | 39    | 0.3 | 0.0031          | 0.033     |
|          | Small cell lung cancer                                     |       | 69    | 0.5 | 0.0032          | 0.033     |
|          | Pancreatic cancer                                          |       | 60    | 0.4 | 0.0035          | 0.034     |
|          | Chronic myeloid leukemia                                   |       | 62    | 0.5 | 0.0042          | 0.039     |
|          | NOD-like receptor signaling pathway                        |       | 52    | 0.4 | 0.0056          | 0.049     |
|          | Glycerolipid metabolism                                    |       | 39    | 0.3 | 0.007           | 0.059     |
|          | Apoptosis                                                  |       | 70    | 0.5 | 0.0077          | 0.062     |
|          | Glycerophospholipid metabolism                             |       | 56    | 0.4 | 0.008           | 0.062     |
|          | Fc epsilon RI signaling pathway                            |       | 63    | 0.5 | 0.01            | 0.076     |
|          | Notch signaling pathway                                    |       | 40    | 0.3 | 0.011           | 0.08      |
|          | Acute myeloid leukemia                                     |       | 48    | 0.4 | 0.013           | 0.089     |
|          | Colorectal cancer                                          |       | 67    | 0.5 | 0.013           | 0.087     |
|          | Non-small cell lung cancer                                 |       | 45    | 0.3 | 0.014           | 0.086     |
|          | N-Glycan biosynthesis                                      |       | 39    | 0.3 | 0.014           | 0.088     |
|          | Toll-like receptor signaling pathway                       |       | 79    | 0.6 | 0.016           | 0.094     |
|          | TP53 (mouse TRP53) signaling pathway                       |       | 55    | 0.4 | 0.017           | 0.097     |
|          | Epithelial cell signaling in Helicobacter pylori infection |       | 55    | 0.4 | 0.017           | 0.097     |
|          | Adipocytokine signaling pathway                            |       | 54    | 0.4 | 0.02            | 0.11      |
|          | RNA polymerase                                             |       | 25    | 0.2 | 0.023           | 0.12      |
|          | Fc gamma R-mediated phagocytosis                           |       | 74    | 0.5 | 0.023           | 0.12      |
|          | Propanoate metabolism                                      |       | 28    | 0.2 | 0.023           | 0.12      |
|          | Pathways in cancer                                         |       | 237   | 1.8 | 0.027           | 0.13      |
|          | TGFB signaling pathway                                     |       | 68    | 0.5 | 0.027           | 0.13      |

|                           |     |     |       |      |
|---------------------------|-----|-----|-------|------|
| Insulin signaling pathway | 102 | 0.8 | 0.029 | 0.14 |
| VEGF signaling pathway    | 59  | 0.4 | 0.034 | 0.15 |
| Prostate cancer           | 69  | 0.5 | 0.034 | 0.15 |
| Lysine degradation        | 36  | 0.3 | 0.049 | 0.21 |

---

**Table S3.** Pathway analysis of genes regulated by *MIR125B1* upon ATRA treatment.

| Category | Term                                       | Genes | Count | %   | P-Value  | Benjamini |
|----------|--------------------------------------------|-------|-------|-----|----------|-----------|
|          | Ribosome                                   |       | 82    | 0.6 | 8.9E-11  | 1.8E-08   |
|          | <b>Lysosome</b>                            |       | 99    | 0.8 | 7.5E-07  | 0.000075  |
|          | Pyrimidine metabolism                      |       | 82    | 0.6 | 1.6E-06  | 0.00011   |
|          | Cell cycle                                 |       | 103   | 0.8 | 5.3E-06  | 0.00026   |
|          | DNA replication                            |       | 35    | 0.3 | 0.000016 | 0.00063   |
|          | Aminoacyl-tRNA biosynthesis                |       | 39    | 0.3 | 0.000016 | 0.00054   |
|          | Spliceosome                                |       | 100   | 0.8 | 0.00014  | 0.004     |
|          | Nucleotide excision repair                 |       | 40    | 0.3 | 0.00016  | 0.0039    |
|          | Huntington's disease                       |       | 137   | 1.1 | 0.00025  | 0.0055    |
|          | Mismatch repair                            |       | 23    | 0.2 | 0.00038  | 0.0075    |
|          | Endocytosis                                |       | 139   | 1.1 | 0.0004   | 0.0072    |
|          | RNA degradation                            |       | 49    | 0.4 | 0.00043  | 0.0071    |
|          | Base excision repair                       |       | 32    | 0.2 | 0.00081  | 0.012     |
|          | Purine metabolism                          |       | 116   | 0.9 | 0.001    | 0.015     |
|          | Glycerophospholipid metabolism             |       | 55    | 0.4 | 0.0031   | 0.04      |
|          | Valine, leucine and isoleucine degradation |       | 37    | 0.3 | 0.0062   | 0.074     |
|          | RNA polymerase                             |       | 25    | 0.2 | 0.0084   | 0.094     |
|          | Progesterone-mediated oocyte maturation    |       | 66    | 0.5 | 0.01     | 0.11      |
|          | Fructose and mannose metabolism            |       | 29    | 0.2 | 0.013    | 0.13      |
|          | Oocyte meiosis                             |       | 81    | 0.6 | 0.023    | 0.2       |
|          | Propanoate metabolism                      |       | 27    | 0.2 | 0.023    | 0.2       |
|          | Steroid biosynthesis                       |       | 16    | 0.1 | 0.024    | 0.19      |
|          | Ubiquitin mediated proteolysis             |       | 99    | 0.8 | 0.025    | 0.2       |
|          | Homologous recombination                   |       | 24    | 0.2 | 0.026    | 0.2       |
|          | TP53 (mouse TRP53) signaling pathway       |       | 52    | 0.4 | 0.027    | 0.2       |
|          | Cysteine and methionine metabolism         |       | 28    | 0.2 | 0.034    | 0.23      |
|          | Lysine degradation                         |       | 35    | 0.3 | 0.035    | 0.23      |
|          | Notch signaling pathway                    |       | 37    | 0.3 | 0.037    | 0.24      |
|          | VEGF signaling pathway                     |       | 56    | 0.4 | 0.043    | 0.26      |
|          | Oxidative phosphorylation                  |       | 93    | 0.7 | 0.044    | 0.26      |
|          | N-Glycan biosynthesis                      |       | 36    | 0.3 | 0.046    | 0.26      |

**Table S4.** Real-time PCR primers.

| Primers name        | Primer sequence                                     |
|---------------------|-----------------------------------------------------|
| <i>RT-MIR125B</i>   | GTCGTATCCAGTGCAGGGTCCGAGGTATTCGCACTGGATACGACTCACAAG |
| <i>MIR125B-F</i>    | GCGGCTCCCTGAGACCCTAAC                               |
| <i>MIR125B-R</i>    | GTGCAGGGTCCGAGGT                                    |
| <i>U6-F</i>         | CGCTTCGGCAGCACATATAC                                |
| <i>U6-R</i>         | TTCACGAATTTGCGTGTCAT                                |
| <i>CEBPB-F</i>      | AACTCTCTGCTTCTCCCTCTG                               |
| <i>CEBPB-R</i>      | AAGCCCGTAGGAACATCTTT                                |
| <i>PML-RARA-F-1</i> | TCTTCTGCCCAACAGCAA                                  |
| <i>PML-RARA-F-2</i> | CCGATGGCTTCGACGAGTT                                 |
| <i>PML-RARA-R</i>   | GCTTGTAGATGCGGGGTAGAG                               |
| <i>CEBPA-F</i>      | GGGTGAGTTCATGGAGAATGG                               |
| <i>CEBPA-R</i>      | CAGTTTGCAAGAATCAGAGCA                               |
| <i>RARA-F</i>       | TCAGTGA ACTCTCCACCAAG                               |
| <i>RARA-R</i>       | TCCAGTCTCAGCATCGTCC                                 |
| <i>SUV39H1-F</i>    | TTCCGCACGGATGATGGGCG                                |
| <i>SUV39H1-R</i>    | TGTCCACGGGGTCCACTTGCAT                              |
| <i>BAK1-F</i>       | AGAGCTGTCTGAACTCACGT                                |
| <i>BAK1-R</i>       | TTAACTGTGCCAGAGCCAT                                 |
| <i>BMF-F</i>        | TGATGTGTTCCAACCAGAGGAT                              |
| <i>BMF-R</i>        | GGTGAGAGGGAAGAGCTGAAGT                              |
